# Supplementary material for: Hydrothermal chimneys host habitat-specific microbial communities: analogues for studying the possible impact of mining seafloor massive sulfide deposits
Source: Sci Rep. 2018 Jul 10;8:10386. doi: 10.1038/s41598-018-28613-5 (PMC6039533; doi:10.1038/s41598-018-28613-5)
Supplement: Supplementary file 2 — Supplementary Table S2: exclusive bacterial and archaeal OTUs present in the active or inactive chimneys. [file 41598_2018_28613_MOESM2_ESM.xlsx]

## Sheet: Bac OTUs only_active chimney
Supplementary Table S2: exclusive bacterial and archaeal OTUs present in the active or inactive chimneys.
Table S2.1: exclusive bacterial OTUs present in active chimney
	open ocean		plume		sulfide talus	vent fluids		active chimneys			inactive chimneys
#OTU ID	RF4	RF1	F9	F5	S3	F6	F1	S5	S6	S8	S7	S1	S2	S4	taxonomy
JN874210,1,1430	0	0	0.00100351	9.81238e-06	4.33894e-06	0.0280984	0.00017951	0.000108219	5.99106e-05	0	0	0	0	0	Bacteria; Aquificae; Aquificae; Aquificales; Aquificaceae; uncultured bacterium; uncultured bacterium
KC294034,1,1328	3.23568e-05	0.0228394	0.000770733	0.000926043	0	2.44831e-05	1.97989e-05	0	0	9.21693e-06	0	0	0	0	Bacteria; Proteobacteria; Alphaproteobacteria; Rhodobacterales; Rhodobacteraceae; Paracoccus
New,ReferenceOTU1934	1.47077e-06	0	6.34852e-05	1.22655e-06	0	0.00205352	0.00197461	0.00911077	1.16493e-05	0	0	0	0	0	Bacteria; Proteobacteria; Epsilonproteobacteria; Campylobacterales; Helicobacteraceae; Sulfurimonas; uncultured bacterium
AM268715,1,1398	4.4123e-06	1.58255e-06	9.46709e-05	0	0	0.00244423	0.0075645	0	6.49032e-05	0	0	0	0	0	Bacteria; Proteobacteria; Epsilonproteobacteria
New,ReferenceOTU623	0	0	0.000446624	9.81238e-06	0	0.00785805	1.31993e-06	0.000130176	8.32092e-06	0	0	0	0	0	Bacteria; Proteobacteria; Epsilonproteobacteria; Nautiliales; Nautiliaceae; Caminibacter; uncultured bacterium
JQ712397,1,1378	0	0	7.35092e-05	2.45309e-06	4.01352e-05	0.00635336	0.000506852	3.76413e-05	1.16493e-05	0	0	0	0	0	Bacteria; Proteobacteria; Epsilonproteobacteria; Campylobacterales; Campylobacteraceae; Arcobacter; uncultured epsilon proteobacterium
JQ678579,1,1473	1.47077e-06	1.58255e-06	0.000182659	0	1.08473e-06	0.00440287	0.00120641	0.000263489	9.31943e-05	2.76508e-05	0	0	0	0	Bacteria; Proteobacteria; Epsilonproteobacteria; Nautiliales; Nautiliaceae; Caminibacter
New,ReferenceOTU1925	0	0	8.79883e-05	1.22655e-06	0	0.00466811	5.54369e-05	2.19574e-05	6.65674e-06	2.02772e-05	0	0	0	0	Bacteria; Proteobacteria; Epsilonproteobacteria; Nautiliales; Nautiliaceae; Caminibacter; uncultured bacterium
JN856415,1,1464	0	0	4.4551e-06	2.45309e-06	0	0.00417844	0.000426336	1.56839e-06	9.98511e-06	0.000206459	0	0	0	0	Bacteria; Aquificae; Aquificae; Aquificales; Desulfurobacteriaceae
AY280414,1,1441	0	0	6.79403e-05	0	0	0.00283086	1.18793e-05	0.0011512	0.000124814	9.21693e-05	0	0	0	0	Bacteria; Proteobacteria; Epsilonproteobacteria; Nautiliales; Nautiliaceae; Caminibacter; uncultured bacterium
FN562876,1,1277	1.47077e-06	0	5.4575e-05	0	0	0.00365308	1.18793e-05	5.33252e-05	0.000404397	0	0	0	0	0	Bacteria; Proteobacteria; Epsilonproteobacteria; Nautiliales; Nautiliaceae; Caminibacter
AY355295,1,1221	1.47077e-06	0	0	0	0	0	0	9.41033e-06	0	0.00415131	0	0	0	0	Bacteria; Proteobacteria; Epsilonproteobacteria; Nautiliales; Nautiliaceae; Nitratifractor; uncultured bacterium
New,ReferenceOTU1732	0	0	0	0	0	2.24428e-05	3.95978e-06	0.000403076	0.00344653	3.68677e-06	0	0	0	0	Bacteria; Proteobacteria; Epsilonproteobacteria; Campylobacterales; Helicobacteraceae; Sulfurimonas; uncultured bacterium
New,ReferenceOTU1081	0	0	0	0	0	7.1409e-06	0	0.00042817	0.00319024	0	0	0	0	0	Bacteria; Proteobacteria; Epsilonproteobacteria; Campylobacterales; Helicobacteraceae; Sulfurimonas; uncultured bacterium
AY770963,1,1477	1.76492e-05	0	6.57128e-05	2.45309e-06	0	0.00338989	3.95978e-05	1.56839e-06	0	0	0	0	0	0	Bacteria; Proteobacteria; Gammaproteobacteria; Pseudomonadales; Pseudomonadaceae; Pseudomonas; uncultured bacterium
New,ReferenceOTU2331	0	0	7.79643e-06	0	0	0.000187704	1.8479e-05	1.56839e-06	1.16493e-05	0.00307477	0	0	0	0	Unassigned
New,ReferenceOTU2441	0	0	0	0	0	4.18253e-05	1.58391e-05	1.56839e-06	0	0.0031485	0	0	0	0	Unassigned
New,ReferenceOTU2449	0	0	2.33893e-05	0	3.2542e-06	0.000499863	0.00262797	6.27356e-06	0	0	0	0	0	0	Bacteria; Proteobacteria; Gammaproteobacteria; Oceanospirillales; E12-CR02-full
HQ336972,1,1349	0	0	7.79643e-06	1.22655e-06	0	0.00273802	3.69579e-05	0	0	0.000300472	0	0	0	0	Bacteria; Aquificae; Aquificae; Aquificales; Desulfurobacteriaceae
New,ReferenceOTU1621	0	0	0	0	0	0.000163221	5.27971e-06	0.00239336	0.000465972	0	0	0	0	0	Bacteria; Proteobacteria; Epsilonproteobacteria; Campylobacterales; Helicobacteraceae; Sulfurovum; uncultured bacterium
New,CleanUp,ReferenceOTU931732	0	0	0	1.22655e-06	0	0.000858948	5.27971e-06	0.00184756	1.33135e-05	1.84339e-06	0	0	0	0	Bacteria; Proteobacteria; Epsilonproteobacteria; Campylobacterales; Helicobacteraceae; Sulfurovum
New,ReferenceOTU1255	0	0	2.22755e-06	0	0	0	0	1.56839e-06	0.000344486	0.00232451	0	0	0	0	Bacteria; Proteobacteria; Epsilonproteobacteria; Nautiliales; Nautiliaceae; Nitratifractor; uncultured bacterium
JQ199269,1,1308	0.000578011	0.000992261	0.000372001	0.000667242	0	4.08051e-06	1.05594e-05	0	0	1.84339e-06	0	0	0	0	Bacteria; Proteobacteria; Alphaproteobacteria; Rhodospirillales; Rhodospirillaceae; AEGEAN-169 marine group; uncultured alpha proteobacterium
New,ReferenceOTU513	0	0	0	0	0	0.000171382	9.23948e-06	0.0007591	6.65674e-06	0.00167564	0	0	0	0	Bacteria; Chloroflexi; Anaerolineae; Anaerolineales; Anaerolineaceae; uncultured
New,ReferenceOTU1302	0	0	3.67546e-05	3.67964e-06	0	0.00250645	1.18793e-05	1.56839e-06	6.65674e-06	5.53016e-06	0	0	0	0	Bacteria; Proteobacteria; Epsilonproteobacteria; Nautiliales; Nautiliaceae; Caminibacter
New,ReferenceOTU1350	0	0	0	0	0	0	0	0.0023667	3.16195e-05	0.000145627	0	0	0	0	Bacteria; Bacteroidetes; Flavobacteriia; Flavobacteriales; R103-B20; uncultured bacterium; uncultured bacterium
New,ReferenceOTU1311	0	0	1.33653e-05	0	1.08473e-06	0.00208004	2.63985e-06	0.000409349	2.49628e-05	0	0	0	0	0	Bacteria; Proteobacteria; Epsilonproteobacteria; Nautiliales; Nautiliaceae; Caminibacter; uncultured bacterium
New,ReferenceOTU1066	0	0	0.000165953	0	0	0.000630439	2.24387e-05	0	0.0010917	0.000597257	0	0	0	0	Bacteria; Proteobacteria; Epsilonproteobacteria; Nautiliales; Nautiliaceae; uncultured; uncultured bacterium
New,ReferenceOTU1629	0	0	3.34133e-06	0	0	3.06038e-06	7.91956e-06	3.13678e-05	0.00240974	3.31809e-05	0	0	0	0	Unassigned
New,ReferenceOTU2220	0	0	2.22755e-06	3.67964e-06	0	0.00235344	5.80768e-05	0	0	1.84339e-06	0	0	0	0	Bacteria; Aquificae; Aquificae; Aquificales; Desulfurobacteriaceae
New,ReferenceOTU1970	0	0	7.12816e-05	0	0	0.00186581	2.63985e-05	6.11672e-05	0.000331173	4.42413e-05	0	0	0	0	Unassigned
AJ507320,1,1514	0	0	1.33653e-05	0	0	0.00170667	1.58391e-05	4.70517e-06	4.99255e-06	0.000641498	0	0	0	0	Bacteria; Aquificae; Aquificae; Aquificales; Desulfurobacteriaceae
HG799952,1,1818	0.000252972	0.000732722	1.11378e-05	0.00130137	0	3.1624e-05	0	4.70517e-06	0	4.7928e-05	0	0	0	0	Bacteria; Firmicutes; Bacilli; Bacillales; Staphylococcaceae; Staphylococcus
New,ReferenceOTU492	0	0	0	0	0	0.000434575	1.45192e-05	0.0014837	0.000444337	0	0	0	0	0	Bacteria; Proteobacteria; Epsilonproteobacteria; Campylobacterales; Helicobacteraceae; Sulfurovum; uncultured epsilon proteobacterium
New,ReferenceOTU1761	0	0	3.34133e-06	1.22655e-06	0	0.00223816	5.27971e-06	0	0	1.65905e-05	0	0	0	0	Bacteria; Aquificae; Aquificae; Aquificales; Desulfurobacteriaceae
JQ712419,1,1381	0	1.58255e-06	4.4551e-06	1.22655e-06	0	0.00161588	0.000596607	3.13678e-05	9.98511e-06	0	0	0	0	0	Bacteria; Proteobacteria; Epsilonproteobacteria; Campylobacterales; Campylobacteraceae; Arcobacter; uncultured epsilon proteobacterium
New,ReferenceOTU1744	1.912e-05	0	0.000328564	1.83982e-05	0	0.00137513	0.000469894	1.56839e-06	1.66418e-06	0	0	0	0	0	Bacteria; Proteobacteria; Gammaproteobacteria; Alteromonadales; Alteromonadaceae; Alteromonas
AF068792,1,1449	0	0	0.000102467	0	0	0.000297877	0.000249466	0	3.32837e-06	0.00155582	0	0	0	0	Bacteria; Aquificae; Aquificae; Aquificales; Hydrogenothermaceae
JN874115,1,1488	1.47077e-06	0	5.12337e-05	0	7.59314e-06	0.00147204	3.82779e-05	0.000523842	1.66418e-06	0	0	0	0	0	Bacteria; Bacteroidetes; Flavobacteriia; Flavobacteriales; R103-B20; uncultured bacterium; uncultured bacterium
New,CleanUp,ReferenceOTU228259	0	0	2.22755e-06	0	0	8.16103e-06	1.31993e-06	0	2.99553e-05	0.00204063	0	0	0	0	Archaea; Nanoarchaeota; Nanoarchaeota Incertae Sedis; Unknown Order; Unknown Family; Nanoarchaeum; uncultured nanoarchaeote
JQ712438,1,1381	0	0	0	0	1.08473e-06	0.000205046	4.75174e-05	0.00178953	1.16493e-05	3.68677e-06	0	0	0	0	Bacteria; Proteobacteria; Epsilonproteobacteria; Campylobacterales; Helicobacteraceae; Sulfurovum; uncultured epsilon proteobacterium
ABCJ01000018,7593,9105	0	0	3.00719e-05	1.22655e-06	0	0.00111908	1.45192e-05	0.000647745	4.99255e-05	6.08317e-05	0	0	0	0	Bacteria; Proteobacteria; Epsilonproteobacteria; Nautiliales; Nautiliaceae; Caminibacter
New,CleanUp,ReferenceOTU762408	0	0	0	0	0	0	3.95978e-06	0	0	0.00186551	0	0	0	0	Bacteria; Aquificae; Aquificae; Aquificales; Desulfurobacteriaceae; Desulfurobacterium
New,ReferenceOTU2197	0	0	0.000338588	1.22655e-06	0	0.00143736	5.27971e-06	0	7.65525e-05	0	0	0	0	0	Bacteria; Proteobacteria; Epsilonproteobacteria; Nautiliales; Nautiliaceae; Nitratiruptor; uncultured bacterium
JQ712475,1,1305	1.47077e-06	0	1.55929e-05	0	0	0.000426414	0.000802515	2.03891e-05	1.16493e-05	0.000553016	0	0	0	0	Bacteria; Proteobacteria; Epsilonproteobacteria; Campylobacterales; Campylobacteraceae; Campylobacter; uncultured epsilon proteobacterium
New,ReferenceOTU2627	0.000298565	0.00104607	0.00016818	0.000294371	0	1.12214e-05	5.27971e-06	0	0	1.84339e-06	0	0	0	0	Bacteria; Acidobacteria; Acidobacteria; Subgroup 6; uncultured bacterium; uncultured bacterium; uncultured bacterium
New,ReferenceOTU631	0	0	0	0	0	4.38655e-05	6.59963e-06	0.00131431	0.000394412	1.47471e-05	0	0	0	0	Bacteria; Proteobacteria; Epsilonproteobacteria; Campylobacterales; Campylobacteraceae; Thiofractor; uncultured bacterium
New,ReferenceOTU383	0	0	3.34133e-05	1.22655e-06	0	0.00161486	2.63985e-05	1.56839e-06	0	8.29524e-05	0	0	0	0	Bacteria; Proteobacteria; Epsilonproteobacteria; Nautiliales; Nautiliaceae; Caminibacter; uncultured bacterium
AM110958,1,1490	1.47077e-06	0	2.22755e-06	0.000657429	0	0.00105073	1.18793e-05	4.70517e-06	4.99255e-06	0	0	0	0	0	Bacteria; Proteobacteria; Gammaproteobacteria; Alteromonadales; Pseudoalteromonadaceae; Pseudoalteromonas
New,ReferenceOTU180	0	0	4.67786e-05	0	0	0.00122007	0.000146512	1.72523e-05	0.000174739	0.000112447	0	0	0	0	Bacteria; Candidate division SR1; uncultured bacterium; uncultured bacterium; uncultured bacterium; uncultured bacterium; uncultured bacterium
New,ReferenceOTU569	0	0	1.33653e-05	0	0	0.00137615	3.43181e-05	0.00029172	0	0	0	0	0	0	Bacteria; Bacteroidetes; VC2,1 Bac22; uncultured bacterium; uncultured bacterium; uncultured bacterium; uncultured bacterium
New,CleanUp,ReferenceOTU707603	0	0	6.34852e-05	0	0	0.000113234	2.50786e-05	7.52827e-05	0.00106508	0.0003484	0	0	0	0	Bacteria; Proteobacteria; Epsilonproteobacteria; Nautiliales; Nautiliaceae; Nitratifractor; uncultured bacterium
New,ReferenceOTU2350	0	0	0	0	0	0.00023871	3.95978e-06	0.00138646	0	0	0	0	0	0	Bacteria; Proteobacteria; Epsilonproteobacteria; Campylobacterales; Helicobacteraceae; Sulfurovum; uncultured epsilon proteobacterium
GU583970,1,1481	1.47077e-06	1.58255e-06	0	0	0	0.000177502	0.000256066	0.000952012	0.00021468	1.84339e-06	0	0	0	0	Bacteria; Proteobacteria; Epsilonproteobacteria; Campylobacterales; Helicobacteraceae; Sulfurovum; uncultured epsilon proteobacterium
New,ReferenceOTU687	0	0	1.55929e-05	0	0	7.54895e-05	2.63985e-05	0.00134568	0.000121485	2.02772e-05	0	0	0	0	Bacteria; Proteobacteria; Epsilonproteobacteria; Nautiliales; Nautiliaceae; Nitratifractor; uncultured epsilon proteobacterium
New,ReferenceOTU349	0	0	8.57607e-05	0	0	0.000360105	0.000933188	0	7.82167e-05	0.00011429	0	0	0	0	Bacteria; BD1-5; uncultured Microgenomates bacterium; uncultured Microgenomates bacterium; uncultured Microgenomates bacterium; uncultured Microgenomates bacterium; uncultured Microgenomates bacterium
New,ReferenceOTU1137	0	0	1.22515e-05	0	0	0	0.000109554	0	6.65674e-06	0.00141388	0	0	0	0	Unassigned
New,ReferenceOTU2423	0	0	0	0	0	4.99863e-05	1.31993e-06	0.00134725	6.82316e-05	0	0	0	0	0	Bacteria; Proteobacteria; Epsilonproteobacteria; Campylobacterales; Helicobacteraceae; Sulfurovum; uncultured bacterium
JQ712443,1,1378	0	0	3.22995e-05	0	0	2.04026e-05	0.000587367	0	0	0.000812933	0	0	0	0	Bacteria; Proteobacteria; Epsilonproteobacteria; Campylobacterales; Campylobacteraceae; Campylobacter; uncultured epsilon proteobacterium
AJ969460,1,1473	1.47077e-06	0	0	0	0	0	2.63985e-06	0	0	0.00141572	0	0	0	0	Bacteria; Thermodesulfobacteria; Thermodesulfobacteria; Thermodesulfobacteriales; Thermodesulfobacteriaceae; uncultured Thermodesulfobacteriaceae bacterium; uncultured Thermodesulfobacteriaceae bacterium
New,CleanUp,ReferenceOTU166031	0	0	3.34133e-06	0	0	0.000111194	0	0.00124687	3.16195e-05	1.84339e-06	0	0	0	0	Unassigned
FR853039,1,1493	0	0	3.34133e-06	0	0	0.00130474	6.20365e-05	3.13678e-06	1.66418e-06	0	0	0	0	0	Bacteria; Proteobacteria; Epsilonproteobacteria; Nautiliales; Nautiliaceae; Nitratifractor; uncultured bacterium
New,CleanUp,ReferenceOTU670814	0	0	3.67546e-05	0	0	0.00105379	0	0.000218006	5.65823e-05	0	0	0	0	0	Bacteria; Aquificae; Aquificae; Aquificales; Aquificaceae
New,CleanUp,ReferenceOTU173141	0	0	2.11617e-05	0	0	0.0012721	0	6.27356e-06	0	5.7145e-05	0	0	0	0	Bacteria; Aquificae; Aquificae; Aquificales; Aquificaceae; Aquifex
New,ReferenceOTU400	0	0	0	0	0	0	3.69579e-05	0	0	0.00131802	0	0	0	0	Bacteria; Candidate division SR1
JQ678560,1,1472	0	0	2.22755e-06	0	0	5.81473e-05	7.52358e-05	0	1.8306e-05	0.00116686	0	0	0	0	Bacteria; Proteobacteria; Epsilonproteobacteria; Nautiliales; Nautiliaceae; Nautilia
New,ReferenceOTU1859	0	0	0	0	0	0	0	0.00127667	0	0	0	0	0	0	Bacteria
HQ673340,1,1525	0.000350042	0.000432037	0.000233893	0.000212193	0	1.02013e-05	0	0	0	1.84339e-06	0	0	0	0	Bacteria; Deferribacteres; Deferribacteres; Deferribacterales; SAR406 clade(Marine group A)
New,ReferenceOTU2018	0	0	0	0	0	0.000196885	1.31993e-06	0.000999064	1.66418e-05	1.84339e-06	0	0	0	0	Bacteria; Proteobacteria; Epsilonproteobacteria; Campylobacterales; Helicobacteraceae; Sulfurovum; uncultured bacterium
New,CleanUp,ReferenceOTU934596	0	0	2.22755e-06	0	0	2.44831e-05	7.91956e-06	0.00111356	1.66418e-06	1.84339e-06	0	0	0	0	Bacteria; Proteobacteria; Epsilonproteobacteria; Campylobacterales; Helicobacteraceae; Sulfurimonas; uncultured bacterium
New,ReferenceOTU1148	0	0	0	0	0	0	0	7.84194e-06	0.00113664	0	0	0	0	0	Bacteria; Proteobacteria; Epsilonproteobacteria; Nautiliales; Nautiliaceae; uncultured
New,ReferenceOTU1714	0	0	0	0	0	0	2.63985e-06	0	0	0.00110234	0	0	0	0	Unassigned
New,ReferenceOTU366	0	0	2.22755e-06	0	0	0.00024075	0	0.000787331	6.82316e-05	0	0	0	0	0	Bacteria; Proteobacteria; Epsilonproteobacteria; Nautiliales; Nautiliaceae; Thioreductor
FR853052,1,1462	0	0	3.11857e-05	0	3.2542e-06	0.000723271	5.01572e-05	1.09787e-05	0.000257949	1.47471e-05	0	0	0	0	Bacteria; Proteobacteria; Epsilonproteobacteria; Campylobacterales; Campylobacteraceae; Campylobacter; uncultured epsilon proteobacterium
New,ReferenceOTU540	0	0	7.79643e-06	1.22655e-06	0	0.00100381	2.77185e-05	4.23465e-05	0	0	0	0	0	0	Bacteria; Proteobacteria; Epsilonproteobacteria; Nautiliales; Nautiliaceae; Lebetimonas
New,CleanUp,ReferenceOTU517018	0	0	0	0	0	4.28454e-05	0	0.000903392	8.65376e-05	0	0	0	0	0	Bacteria; Proteobacteria; Epsilonproteobacteria; Nautiliales; Nautiliaceae; Thioreductor
New,CleanUp,ReferenceOTU747629	0	0	0	0	0	6.52882e-05	1.31993e-06	0.000266626	0.000697293	0	0	0	0	0	Bacteria; Proteobacteria; Epsilonproteobacteria; Nautiliales; Nautiliaceae; uncultured
New,CleanUp,ReferenceOTU699193	0	0	0	0	0	0	1.31993e-06	0	0	0.00100833	0	0	0	0	Unassigned
AY280423,1,1439	0	0	0	0	0	3.26441e-05	6.59963e-06	5.6462e-05	0	0.000906946	0	0	0	0	Bacteria; Deferribacteres; Deferribacteres; Deferribacterales; Deferribacterales Incertae Sedis; Caldithrix; uncultured bacterium
New,CleanUp,ReferenceOTU678249	0	0	3.34133e-06	0	0	2.44831e-05	5.27971e-06	0.000962991	3.32837e-06	1.84339e-06	0	0	0	0	Bacteria; Proteobacteria; Epsilonproteobacteria; Campylobacterales; Helicobacteraceae; Sulfurimonas; uncultured bacterium
New,ReferenceOTU2260	0	0	0	0	0	0.000179543	1.31993e-05	0.000796742	0	0	0	0	0	0	Bacteria; Proteobacteria; Deltaproteobacteria; Myxococcales; 0319-6G20; uncultured organism; uncultured organism
New,ReferenceOTU1383	0	0	0	0	0	3.87649e-05	0	1.72523e-05	3.99404e-05	0.000890355	0	0	0	0	Unassigned
AJ441199,1,1415	0	0	0	0	0	8.16103e-06	0.000964866	0	4.99255e-06	0	0	0	0	0	Bacteria; Proteobacteria; Epsilonproteobacteria; Campylobacterales; Helicobacteraceae; Sulfurimonas; uncultured bacterium
FJ905710,1,1379	0	0	1.44791e-05	0	0	0.000945659	0	0	4.99255e-06	3.68677e-06	0	0	0	0	Bacteria; Proteobacteria; Epsilonproteobacteria; Nautiliales; Nautiliaceae; Lebetimonas; uncultured bacterium
New,CleanUp,ReferenceOTU981127	0	0	0	0	0	2.04026e-06	2.63985e-06	0	0	0.000954874	0	0	0	0	Bacteria; Proteobacteria; Deltaproteobacteria; Desulfarculales; Desulfarculaceae; Desulfarculus; uncultured bacterium
New,CleanUp,ReferenceOTU628262	0	0	0	0	0	0.000100993	7.91956e-06	0.000417191	0.000426031	5.53016e-06	0	0	0	0	Bacteria; Proteobacteria; Epsilonproteobacteria; Campylobacterales; Helicobacteraceae; Sulfurovum; uncultured epsilon proteobacterium
New,ReferenceOTU1260	0	0	0	0	0	4.18253e-05	0	0.000519137	0.000394412	0	0	0	0	0	Bacteria; Proteobacteria; Epsilonproteobacteria; Campylobacterales; Helicobacteraceae; Sulfurimonas
New,CleanUp,ReferenceOTU534386	0	0	7.79643e-06	0	0	0	0.000578128	0	0	0.00035393	0	0	0	0	Bacteria; Aquificae; Aquificae; Aquificales; Desulfurobacteriaceae; Desulfurobacterium
New,ReferenceOTU1546	0	0	0	0	0	0.000753875	7.91956e-06	5.80304e-05	9.31943e-05	0	0	0	0	0	Bacteria; Proteobacteria; Epsilonproteobacteria; Campylobacterales; Helicobacteraceae; Sulfurovum; uncultured epsilon proteobacterium
New,CleanUp,ReferenceOTU325717	0	0	4.4551e-06	0	0	0	2.50786e-05	0	0.000842077	1.47471e-05	0	0	0	0	Bacteria; Aquificae; Aquificae; Aquificales; Desulfurobacteriaceae; Desulfurobacterium
New,CleanUp,ReferenceOTU685719	0	0	7.79643e-06	2.45309e-06	0	0.000788559	1.8479e-05	1.56839e-06	6.49032e-05	0	0	0	0	0	Bacteria; Proteobacteria; Epsilonproteobacteria; Nautiliales; Nautiliaceae; Nitratiruptor
New,ReferenceOTU2214	0	0	0	0	0	8.16103e-05	2.11188e-05	0.000158407	0.000599106	3.68677e-06	0	0	0	0	Bacteria; Proteobacteria; Epsilonproteobacteria; Campylobacterales; Helicobacteraceae; Sulfurovum; uncultured bacterium
New,ReferenceOTU1750	0	0	0	0	0	7.1409e-06	1.18793e-05	0	0	0.000844271	0	0	0	0	Unassigned
New,ReferenceOTU799	0	0	1.11378e-06	0	0	1.53019e-05	1.18793e-05	0.000374845	0.000457651	1.84339e-06	0	0	0	0	Bacteria; Proteobacteria; Epsilonproteobacteria; Campylobacterales; Helicobacteraceae; Sulfurovum; uncultured bacterium
New,ReferenceOTU66	5.29476e-05	0.000147178	0.000488947	0.000107936	0	3.06038e-05	7.91956e-06	0	0	2.02772e-05	0	0	0	0	Bacteria; Candidate division OD1; uncultured deep-sea bacterium; uncultured deep-sea bacterium; uncultured deep-sea bacterium; uncultured deep-sea bacterium; uncultured deep-sea bacterium
New,CleanUp,ReferenceOTU902358	0	0	2.22755e-06	0	0	9.48719e-05	3.95978e-06	0.000744985	4.99255e-06	1.84339e-06	0	0	0	0	Bacteria; Proteobacteria; Epsilonproteobacteria; Nautiliales; Nautiliaceae; Thioreductor
FR852941,1,937	0	0	0	0	0	5.10064e-06	1.31993e-06	0	0.000321188	0.000516148	0	0	0	0	Archaea; Crenarchaeota; Thermoprotei; Desulfurococcales; Desulfurococcaceae; uncultured; uncultured archaeon
New,ReferenceOTU1422	0	1.58255e-06	0	0	0	0	0	0.00080772	3.32837e-06	1.10603e-05	0	0	0	0	Bacteria; Bacteroidetes; Flavobacteriia; Flavobacteriales; R103-B20; uncultured bacterium; uncultured bacterium
New,CleanUp,ReferenceOTU247399	0	0	0	0	0	7.1409e-06	0	0.000128608	0.00068398	1.84339e-06	0	0	0	0	Bacteria; Proteobacteria; Epsilonproteobacteria; Nautiliales; Nautiliaceae; uncultured
New,ReferenceOTU1520	0	0	0	1.22655e-06	0	0.000347864	0.000300943	0.000163112	8.32092e-06	0	0	0	0	0	Bacteria; Proteobacteria; Epsilonproteobacteria; Campylobacterales; Campylobacteraceae; Arcobacter; uncultured epsilon proteobacterium
New,CleanUp,ReferenceOTU652734	0	0	0	0	0	0	0	0	0	0.000809246	0	0	0	0	Unassigned
DQ228625,1,1358	0	0	0	0	0	0	0.000128033	1.56839e-06	0	0.000672836	0	0	0	0	Archaea; Euryarchaeota; Methanococci; Methanococcales; Methanocaldococcaceae; Methanocaldococcus
New,ReferenceOTU2336	0	0	2.22755e-06	0	0	5.91674e-05	3.95978e-06	0.000679112	5.32539e-05	0	0	0	0	0	Bacteria; Proteobacteria; Epsilonproteobacteria; Nautiliales; Nautiliaceae; Thioreductor
New,CleanUp,ReferenceOTU581095	0	0	0	0	0	8.87511e-05	3.95978e-06	0.000583441	8.98659e-05	1.65905e-05	0	0	0	0	Bacteria; Proteobacteria; Epsilonproteobacteria; Campylobacterales; Helicobacteraceae; Sulfurovum
New,ReferenceOTU247	0	0	0	0	0	0	3.69579e-05	1.56839e-06	0	0.000742885	0	0	0	0	Unassigned
New,ReferenceOTU509	0	0	5.90301e-05	0	0	0.000179543	0.000128033	0.000183501	8.1545e-05	0.000145627	0	0	0	0	Bacteria; Candidate division SR1; uncultured bacterium; uncultured bacterium; uncultured bacterium; uncultured bacterium; uncultured bacterium
New,CleanUp,ReferenceOTU1006563	0	0	1.78204e-05	1.22655e-06	0	0.000711029	3.82779e-05	7.84194e-06	0	0	0	0	0	0	Bacteria; Bacteroidetes; Bacteroidia; Bacteroidales; Marinilabiaceae; uncultured; uncultured bacterium
New,ReferenceOTU1712	0	0	6.68265e-06	0	0	0.000338683	3.95978e-05	0.000356024	1.8306e-05	3.68677e-06	0	0	0	0	Bacteria; Proteobacteria; Epsilonproteobacteria; Nautiliales; Nautiliaceae; Caminibacter
New,ReferenceOTU2239	0	0	0	0	0	0.000215247	0	0.000439149	0.000106508	0	0	0	0	0	Bacteria; Proteobacteria; Epsilonproteobacteria; Nautiliales; Nautiliaceae; Thioreductor
New,CleanUp,ReferenceOTU878317	0	0	0	0	0	0	6.59963e-06	0	0	0.000741041	0	0	0	0	Bacteria; Candidate division OD1; uncultured bacterium; uncultured bacterium; uncultured bacterium; uncultured bacterium; uncultured bacterium
New,CleanUp,ReferenceOTU943478	0	0	0	0	0	0	0	0.00074028	3.32837e-06	0	0	0	0	0	Bacteria; Proteobacteria; Epsilonproteobacteria; Campylobacterales; Helicobacteraceae; Sulfurimonas; bacterium enrichment culture clone 16S-9
EF218996,1,1378	0	0	0	0	0	3.06038e-06	0	0.000724596	0	0	0	0	0	0	Bacteria; Proteobacteria
New,CleanUp,ReferenceOTU282817	0	0	0	0	0	0	0	0.000307404	0.000396076	0	0	0	0	0	Bacteria; Proteobacteria; Epsilonproteobacteria; Campylobacterales; Campylobacteraceae; Sulfurospirillum; uncultured bacterium
New,CleanUp,ReferenceOTU467214	0	0	7.79643e-06	0	0	2.44831e-05	0	0.000655587	0	1.84339e-06	0	0	0	0	Bacteria; Proteobacteria; Epsilonproteobacteria; Nautiliales; Nautiliaceae; Caminibacter; uncultured bacterium
New,ReferenceOTU774	0	0	0	0	0	1.53019e-05	0	0.000669702	0	0	0	0	0	0	Bacteria; Proteobacteria; Epsilonproteobacteria; Campylobacterales; Helicobacteraceae; Sulfurimonas; uncultured bacterium
New,ReferenceOTU174	0	0	0	0	0	8.87511e-05	6.59963e-06	0.000432875	0.000146448	0	0	0	0	0	Bacteria; Proteobacteria; Epsilonproteobacteria; Campylobacterales; Helicobacteraceae; Sulfurovum; uncultured bacterium
New,CleanUp,ReferenceOTU182853	0	0	6.12577e-05	1.10389e-05	0	0.000542708	2.90384e-05	3.13678e-06	1.16493e-05	1.47471e-05	0	0	0	0	Bacteria; Proteobacteria; Epsilonproteobacteria; Nautiliales; Nautiliaceae; Caminibacter
New,CleanUp,ReferenceOTU492551	0	0	0	0	0	5.10064e-06	0	0.000657155	1.66418e-06	1.84339e-06	0	0	0	0	Bacteria; Proteobacteria
JN886904,1,1521	7.35383e-05	0.000428872	7.12816e-05	8.46317e-05	0	0	0	0	0	7.37354e-06	0	0	0	0	Bacteria; Proteobacteria; Deltaproteobacteria; Sh765B-TzT-29
New,CleanUp,ReferenceOTU676935	0	0	3.22995e-05	0	0	0.000438655	0.00018083	0	3.32837e-06	0	0	0	0	0	Bacteria; Proteobacteria; Epsilonproteobacteria; Campylobacterales; Helicobacteraceae; Sulfurimonas; uncultured bacterium
New,CleanUp,ReferenceOTU480075	0	0	1.0024e-05	0	0	0	2.37587e-05	0	0	0.000617534	0	0	0	0	Bacteria; Candidate division SR1; uncultured bacterium; uncultured bacterium; uncultured bacterium; uncultured bacterium; uncultured bacterium
New,ReferenceOTU2343	0	0	3.11857e-05	0	0	0.000569232	2.63985e-06	1.09787e-05	3.49479e-05	1.84339e-06	0	0	0	0	Bacteria; Proteobacteria; Epsilonproteobacteria; Nautiliales; Nautiliaceae; Thioreductor
New,ReferenceOTU2340	0	0	0	0	0	0.000148939	9.76746e-05	0.000202322	0.000199702	1.84339e-06	0	0	0	0	Bacteria; Proteobacteria; Epsilonproteobacteria; Campylobacterales; Helicobacteraceae; Sulfurovum; uncultured bacterium
New,CleanUp,ReferenceOTU443043	0	0	0	0	0	0.000197905	0	0.000399939	4.4933e-05	0	0	0	0	0	Bacteria; Proteobacteria; Epsilonproteobacteria; Nautiliales; Nautiliaceae; uncultured
New,CleanUp,ReferenceOTU829296	0	0	0	0	0	0	0	3.13678e-06	0.000639047	0	0	0	0	0	Bacteria; Proteobacteria; Epsilonproteobacteria; Nautiliales; Nautiliaceae; Nitratifractor; uncultured bacterium
JN873978,1,1448	0	0	1.44791e-05	0	0	0.000443756	1.31993e-06	0.000174091	8.32092e-06	0	0	0	0	0	Bacteria; Proteobacteria; Epsilonproteobacteria; Nautiliales; Nautiliaceae; Caminibacter
New,CleanUp,ReferenceOTU710522	0	0	0	0	0	3.06038e-06	0	0.000633629	0	0	0	0	0	0	Unassigned
New,ReferenceOTU1271	0	0	0	0	0	0	0	1.56839e-06	0	0.000612004	0	0	0	0	Bacteria; Proteobacteria; Epsilonproteobacteria; Nautiliales; Nautiliaceae; Nitratifractor; uncultured bacterium
FR852997,1,1487	0	0	1.78204e-05	0	0	0.000544748	1.31993e-05	3.45046e-05	0	0	0	0	0	0	Bacteria; Bacteroidetes; Bacteroidia; Bacteroidales; Marinilabiaceae; uncultured; uncultured bacterium
New,CleanUp,ReferenceOTU480876	0	0	0	0	0	0.000118335	0	0.00034034	0.000141456	0	0	0	0	0	Bacteria; Proteobacteria; Epsilonproteobacteria; Nautiliales; Nautiliaceae; Thioreductor
New,CleanUp,ReferenceOTU297791	0	0	0	0	0	0	3.95978e-06	0	0	0.000591727	0	0	0	0	Unassigned
New,CleanUp,ReferenceOTU1136839	0	0	0	0	0	2.04026e-06	0	0.000589714	0	0	0	0	0	0	Bacteria; Proteobacteria; Epsilonproteobacteria; Campylobacterales; Helicobacteraceae; Sulfurovum; uncultured bacterium
New,CleanUp,ReferenceOTU662678	5.44183e-05	3.95638e-05	0.000282899	1.22655e-05	0	0.000187704	6.59963e-06	3.13678e-06	0	0	0	0	0	0	Bacteria; Proteobacteria; Gammaproteobacteria; Oceanospirillales; Halomonadaceae; Halomonas; uncultured bacterium
New,ReferenceOTU2092	0	0	0	0	0	0	3.95978e-06	0	0	0.000578823	0	0	0	0	Bacteria; Aquificae; Aquificae; Aquificales; Desulfurobacteriaceae; Desulfurobacterium
JN873933,1,1549	0	0	3.34133e-06	0	0	0.00040193	1.31993e-05	0.000123903	2.66269e-05	5.53016e-06	0	0	0	0	Bacteria; Aquificae; Aquificae; Aquificales; Desulfurobacteriaceae; Balnearium
New,ReferenceOTU1923	0	0	0	0	0	4.18253e-05	5.27971e-06	0.00032152	0.000204695	0	0	0	0	0	Bacteria; Proteobacteria; Epsilonproteobacteria; Nautiliales; Nautiliaceae; uncultured; uncultured proteobacterium
New,CleanUp,ReferenceOTU1122365	0	0	7.79643e-06	0	0	0.000124456	0.000430296	0	9.98511e-06	0	0	0	0	0	Unassigned
New,ReferenceOTU2575	0	1.58255e-06	0	0	0	0	4.88373e-05	0	0	0.000516148	0	0	0	0	Unassigned
New,CleanUp,ReferenceOTU682189	0	0	0	0	0	6.01876e-05	7.91956e-06	0	0	0.000481124	0	0	0	0	Bacteria; Proteobacteria; Deltaproteobacteria; Desulfobacterales; Desulfobulbaceae; SEEP-SRB2; uncultured bacterium
New,ReferenceOTU1858	0	0	0	0	0	0.000153019	6.99561e-05	0.000326225	0	0	0	0	0	0	Bacteria; Proteobacteria; Deltaproteobacteria
New,ReferenceOTU156	0	0	0	0	0	3.46844e-05	0.000436896	7.37143e-05	0	0	0	0	0	0	Bacteria; Proteobacteria; Epsilonproteobacteria; Campylobacterales; Campylobacteraceae; Arcobacter; uncultured epsilon proteobacterium
New,CleanUp,ReferenceOTU869614	0	0	0	0	0	1.42818e-05	1.31993e-06	0.000398371	0.000124814	1.84339e-06	0	0	0	0	Bacteria; Proteobacteria; Epsilonproteobacteria; Campylobacterales; Helicobacteraceae; Sulfurovum; uncultured bacterium
New,ReferenceOTU457	0	0	5.56888e-06	0	0	1.02013e-05	0	0.000509726	1.66418e-06	0	0	0	0	0	Bacteria; Proteobacteria; Epsilonproteobacteria; Campylobacterales; Helicobacteraceae; Sulfurimonas; uncultured bacterium
New,CleanUp,ReferenceOTU202713	0	0	0	0	1.08473e-06	1.83623e-05	0.000190069	0.000312109	0	0	0	0	0	0	Bacteria; BD1-5; uncultured bacterium; uncultured bacterium; uncultured bacterium; uncultured bacterium; uncultured bacterium
New,ReferenceOTU272	0	0	0	0	0	3.06038e-06	0	0.000285447	0.000151441	7.92656e-05	0	0	0	0	Bacteria; Caldiserica; Caldisericia; Caldisericales; Caldisericaceae; Caldisericum
New,ReferenceOTU2154	0	0	0	0	0	0.000259113	3.95978e-06	0.000244669	6.65674e-06	0	0	0	0	0	Bacteria; Proteobacteria; Epsilonproteobacteria; Campylobacterales; Helicobacteraceae; Sulfurovum
FR853036,1,1481	0	0	0	1.22655e-06	0	0.000129556	0.000374859	3.13678e-06	0	0	0	0	0	0	Bacteria; Proteobacteria; Epsilonproteobacteria
New,CleanUp,ReferenceOTU955658	0	0	0	0	0	0	0	0	0	0.000508775	0	0	0	0	Bacteria; Proteobacteria; Epsilonproteobacteria; Nautiliales; Nautiliaceae; Nitratifractor; uncultured bacterium
New,CleanUp,ReferenceOTU989682	0	0	0	0	0	0	9.23948e-06	0	0	0.000495871	0	0	0	0	Bacteria; Thermodesulfobacteria; Thermodesulfobacteria; Thermodesulfobacteriales; Thermodesulfobacteriaceae; uncultured Thermodesulfobacteriaceae bacterium; uncultured Thermodesulfobacteriaceae bacterium
New,ReferenceOTU998	1.47077e-06	0	0	0	0	0.000496802	1.31993e-06	4.70517e-06	0	0	0	0	0	0	Bacteria; Proteobacteria; Epsilonproteobacteria; Campylobacterales; Helicobacteraceae; Sulfurovum; uncultured epsilon proteobacterium
New,CleanUp,ReferenceOTU552433	0	0	0	0	0	0.000148939	0	6.90091e-05	0.000264605	1.84339e-05	0	0	0	0	Bacteria; Proteobacteria; Epsilonproteobacteria; Nautiliales; Nautiliaceae; uncultured
New,ReferenceOTU1665	0	0	0	0	0	0.000229529	1.18793e-05	0.000227416	2.99553e-05	0	0	0	0	0	Bacteria; Proteobacteria; Epsilonproteobacteria; Nautiliales; Nautiliaceae; Caminibacter
New,CleanUp,ReferenceOTU307025	0	0	0	0	0	1.22415e-05	0	0.000483064	0	0	0	0	0	0	Bacteria; Acidobacteria; Holophagae; Acanthopleuribacterales; Acanthopleuribacteraceae; Thermotomaculum; uncultured bacterium
New,ReferenceOTU2574	0	0	0	0	0	0	0	0	0	0.000494027	0	0	0	0	Bacteria; Thermodesulfobacteria; Thermodesulfobacteria; Thermodesulfobacteriales; Thermodesulfobacteriaceae; uncultured Thermodesulfobacteriaceae bacterium; uncultured Thermodesulfobacteriaceae bacterium
New,CleanUp,ReferenceOTU177650	0	0	3.34133e-06	1.22655e-06	0	0.0004815	0	4.70517e-06	1.66418e-06	0	0	0	0	0	Bacteria; Proteobacteria; Epsilonproteobacteria; Nautiliales; Nautiliaceae; Caminibacter; uncultured bacterium
New,CleanUp,ReferenceOTU602542	0.000150018	0.000180411	0.000105809	4.66088e-05	0	5.10064e-06	1.31993e-06	1.56839e-06	0	0	0	0	0	0	Bacteria; Chloroflexi; SAR202 clade; uncultured deep-sea bacterium; uncultured deep-sea bacterium; uncultured deep-sea bacterium; uncultured deep-sea bacterium
New,CleanUp,ReferenceOTU543514	0	0	4.4551e-06	0	0	0	0	0.000453264	2.99553e-05	1.84339e-06	0	0	0	0	Bacteria; Proteobacteria; Epsilonproteobacteria; Campylobacterales; Helicobacteraceae
New,ReferenceOTU1880	0	0	0	0	0	4.59058e-05	0	0.000367003	6.82316e-05	0	0	0	0	0	Bacteria; Proteobacteria; Epsilonproteobacteria; Nautiliales; Nautiliaceae
New,ReferenceOTU887	0	0	0	0	0	0	1.31993e-06	0	0	0.000477437	0	0	0	0	Bacteria; Aquificae; Aquificae; Aquificales; Desulfurobacteriaceae; Desulfurobacterium
New,CleanUp,ReferenceOTU1061140	0	0	0	0	0	4.38655e-05	7.91956e-06	0.000181933	0	0.000243327	0	0	0	0	Bacteria; Acidobacteria; Holophagae; Acanthopleuribacterales; Acanthopleuribacteraceae; Thermotomaculum
D86374,1,1409	0	0	0	0	0	0.000454977	0	0	0	1.47471e-05	0	0	0	0	Bacteria; Proteobacteria; Gammaproteobacteria; Thiotrichales; Piscirickettsiaceae; Hydrogenovibrio
New,ReferenceOTU287	0	0	0	0	0	0	0	0	0	0.000464533	0	0	0	0	Bacteria; Proteobacteria; Epsilonproteobacteria; Nautiliales; Nautiliaceae; Nitratifractor; uncultured bacterium
New,CleanUp,ReferenceOTU924632	0	0	0	0	0	6.63083e-05	6.59963e-06	0.000258784	0.00012315	0	0	0	0	0	Bacteria; Proteobacteria; Epsilonproteobacteria; Nautiliales; Nautiliaceae; Caminibacter; uncultured bacterium
New,ReferenceOTU891	0	0	0	0	0	5.81473e-05	1.31993e-06	0.000307404	8.1545e-05	0	0	0	0	0	Bacteria; Proteobacteria; Epsilonproteobacteria; Campylobacterales; Helicobacteraceae; Sulfurovum; uncultured bacterium
New,ReferenceOTU749	0	0	0	0	0	3.77447e-05	0	0.00034034	4.82613e-05	1.65905e-05	0	0	0	0	Bacteria; Proteobacteria; Epsilonproteobacteria; Campylobacterales; Helicobacteraceae; Sulfurovum
New,CleanUp,ReferenceOTU505015	0	0	0	0	0	0	0	3.29362e-05	0.000409389	0	0	0	0	0	Bacteria; Proteobacteria; Epsilonproteobacteria; Campylobacterales; Helicobacteraceae; Sulfurimonas; uncultured bacterium
New,CleanUp,ReferenceOTU631789	0	0	0	0	0	0.000155059	3.82779e-05	0.000246237	0	0	0	0	0	0	Unassigned
New,CleanUp,ReferenceOTU566169	0	0	0	0	0	2.04026e-06	1.31993e-06	6.43039e-05	0.000369449	0	0	0	0	0	Bacteria; Proteobacteria; Epsilonproteobacteria; Campylobacterales; Helicobacteraceae; Sulfurovum; uncultured epsilon proteobacterium
New,CleanUp,ReferenceOTU61567	0	0	1.22515e-05	0	0	0.000379488	1.31993e-06	1.56839e-05	2.82911e-05	0	0	0	0	0	Bacteria; Proteobacteria; Epsilonproteobacteria; Nautiliales; Nautiliaceae; Caminibacter; uncultured bacterium
New,CleanUp,ReferenceOTU26066	0	0	0	0	0	1.12214e-05	0	0.000425033	0	0	0	0	0	0	Unassigned
New,ReferenceOTU29	0	0	0	1.22655e-06	0	0.00032134	2.63985e-06	0	0	0.00010876	0	0	0	0	Unassigned
New,ReferenceOTU1644	0	0	0	0	0	6.52882e-05	6.59963e-06	0.000236827	0.000124814	0	0	0	0	0	Bacteria; Proteobacteria; Epsilonproteobacteria; Nautiliales; Nautiliaceae; uncultured
New,CleanUp,ReferenceOTU832913	0	0	4.4551e-06	0	0	0.000121395	9.23948e-06	0.000219574	7.48883e-05	0	0	0	0	0	Bacteria; Proteobacteria; Epsilonproteobacteria; Campylobacterales; Helicobacteraceae; Sulfurovum; uncultured bacterium
New,ReferenceOTU1699	0	0	1.11378e-06	0	0	2.04026e-06	0	0.000421897	3.32837e-06	0	0	0	0	0	Bacteria; Proteobacteria; Epsilonproteobacteria; Campylobacterales; Helicobacteraceae; Sulfurimonas
JQ611140,1,1366	0	0	7.79643e-06	0	0	7.03888e-05	6.59963e-06	0.000334067	6.65674e-06	0	0	0	0	0	Bacteria; Proteobacteria; Epsilonproteobacteria; Campylobacterales; Helicobacteraceae; Sulfurimonas; uncultured bacterium
HQ672842,1,1478	0.000122074	0.000126604	8.35332e-05	8.58583e-05	0	0	2.63985e-06	1.56839e-06	0	0	0	0	0	0	Bacteria; Proteobacteria; Deltaproteobacteria; SAR324 clade(Marine group B); uncultured bacterium; uncultured bacterium; uncultured bacterium
New,CleanUp,ReferenceOTU1122011	0	0	0	0	0	0	7.65557e-05	0	0	0.000344713	0	0	0	0	Unassigned
New,CleanUp,ReferenceOTU734399	0	0	0	0	0	8.16103e-06	1.97989e-05	0.000307404	8.32092e-05	0	0	0	0	0	Bacteria; SBYG-2791; uncultured organism; uncultured organism; uncultured organism; uncultured organism; uncultured organism
New,ReferenceOTU153	0	0	0	0	0	0	0	0	0	0.000418449	0	0	0	0	Bacteria; Proteobacteria; Deltaproteobacteria; Desulfarculales; Desulfarculaceae; Desulfarculus
DQ118403,32210,33682	0	0	0	0	0	5.6107e-05	3.95978e-06	0.00034034	6.65674e-06	1.10603e-05	0	0	0	0	Archaea; Euryarchaeota; Thermoplasmata; Thermoplasmatales; Deep Sea Hydrothermal Vent Gp 2(DHVEG-2); uncultured archaeon; uncultured archaeon
New,CleanUp,ReferenceOTU558065	0	0	3.67546e-05	1.22655e-06	8.67787e-06	0.000350924	1.31993e-06	1.41155e-05	0	0	0	0	0	0	Bacteria; Bacteroidetes; Flavobacteriia; Flavobacteriales; R103-B20; uncultured bacterium; uncultured bacterium
New,ReferenceOTU183	0	0	0	0	0	0.00016016	1.58391e-05	0.000222711	8.32092e-06	0	0	0	0	0	Bacteria; Proteobacteria; Epsilonproteobacteria; Campylobacterales; Helicobacteraceae; Sulfurovum; uncultured bacterium
New,ReferenceOTU1787	0	0	8.9102e-06	0	0	0.000232589	0	1.88207e-05	0.000131471	1.47471e-05	0	0	0	0	Bacteria; Aquificae; Aquificae; Aquificales; Desulfurobacteriaceae; Thermovibrio
New,ReferenceOTU203	0	0	0	0	0	3.1624e-05	1.31993e-06	0.000323088	3.32837e-05	1.29037e-05	0	0	0	0	Bacteria; Proteobacteria; Epsilonproteobacteria; Campylobacterales; Helicobacteraceae; Sulfurovum
New,CleanUp,ReferenceOTU794920	0	0	0	0	0	0	6.59963e-06	0	0	0.000394485	0	0	0	0	Bacteria; Candidate division OP8
New,CleanUp,ReferenceOTU1080160	0	0	0	0	0	8.46706e-05	0	0.000266626	4.4933e-05	0	0	0	0	0	Bacteria; Proteobacteria; Epsilonproteobacteria; Nautiliales; Nautiliaceae; uncultured
New,CleanUp,ReferenceOTU671321	0	0	0	0	0	1.22415e-05	2.63985e-06	0.000377982	0	0	0	0	0	0	Bacteria; Proteobacteria; Epsilonproteobacteria; Campylobacterales; Helicobacteraceae; Sulfurimonas; uncultured bacterium
New,CleanUp,ReferenceOTU776730	0	0	0	0	0	1.12214e-05	0	0.000260353	0.000106508	0	0	0	0	0	Bacteria; Proteobacteria; Epsilonproteobacteria; Campylobacterales; Campylobacteraceae; Thiofractor; uncultured bacterium
New,CleanUp,ReferenceOTU907735	0	0	0	0	0	4.08051e-05	0	0.000337204	0	0	0	0	0	0	Bacteria; Proteobacteria; Epsilonproteobacteria; Nautiliales; Nautiliaceae; Caminibacter
New,CleanUp,ReferenceOTU795298	0	0	3.34133e-06	0	0	0.000188724	1.7159e-05	0.000127039	3.99404e-05	0	0	0	0	0	Bacteria; Proteobacteria; Epsilonproteobacteria; Campylobacterales; Helicobacteraceae; Sulfurovum; uncultured epsilon proteobacterium
New,CleanUp,ReferenceOTU716409	0	0	0	0	0	4.48856e-05	0.000319422	1.56839e-06	9.98511e-06	0	0	0	0	0	Bacteria; Proteobacteria; Epsilonproteobacteria; Campylobacterales; Helicobacteraceae; Sulfurovum; uncultured epsilon proteobacterium
New,ReferenceOTU395	0	0	0	0	0	4.99863e-05	3.5638e-05	0.000213301	9.98511e-06	6.63619e-05	0	0	0	0	Bacteria; Proteobacteria; Epsilonproteobacteria; Nautiliales; Nautiliaceae; Nitratifractor
New,ReferenceOTU2136	0	0	0	0	0	0	0	0	0	0.000357617	0	0	0	0	Bacteria; Thermodesulfobacteria; Thermodesulfobacteria; Thermodesulfobacteriales; Thermodesulfobacteriaceae; Thermodesulfatator
New,CleanUp,ReferenceOTU625827	0	0	0	0	0	4.08051e-06	0	0.000343477	6.65674e-06	0	0	0	0	0	Bacteria; Proteobacteria; Epsilonproteobacteria; Campylobacterales; Helicobacteraceae; Sulfurovum
New,CleanUp,ReferenceOTU336189	0	0	0	0	0	3.06038e-06	0	0	0.000349479	0	0	0	0	0	Bacteria; Proteobacteria; Epsilonproteobacteria; Campylobacterales; Helicobacteraceae; Sulfurimonas; uncultured bacterium
New,ReferenceOTU1985	0	0	0	0	0	7.1409e-06	0	0.000343477	1.66418e-06	0	0	0	0	0	Unassigned
New,CleanUp,ReferenceOTU435884	3.67691e-05	0.00014243	6.57128e-05	0.000105483	0	0	0	1.56839e-06	0	0	0	0	0	0	Bacteria; Chloroflexi; SAR202 clade; uncultured Chloroflexi bacterium; uncultured Chloroflexi bacterium; uncultured Chloroflexi bacterium; uncultured Chloroflexi bacterium
New,CleanUp,ReferenceOTU710545	0	0	0	0	0	0	0	2.8231e-05	0.000322852	0	0	0	0	0	Bacteria; Proteobacteria; Epsilonproteobacteria; Campylobacterales; Campylobacteraceae; Sulfurospirillum; uncultured bacterium
New,CleanUp,ReferenceOTU637627	0	0	0	0	0	0	0	0	0	0.000350243	0	0	0	0	Bacteria; Proteobacteria; Epsilonproteobacteria; Nautiliales; Nautiliaceae; Caminibacter; uncultured bacterium
AB260038,1,1420	0	0	0	0	0	0	9.89945e-05	0	0	0.0002507	0	0	0	0	Bacteria; Proteobacteria; Deltaproteobacteria; Desulfovibrionales; Desulfohalobiaceae
New,ReferenceOTU2620	0	0	0	0	0	6.12077e-06	0	0.00034034	0	1.84339e-06	0	0	0	0	Unassigned
New,ReferenceOTU1300	0	0	0	0	0	7.54895e-05	1.05594e-05	0.000257216	3.32837e-06	0	0	0	0	0	Bacteria; Proteobacteria; Epsilonproteobacteria; Campylobacterales; Helicobacteraceae; Sulfurovum; uncultured epsilon proteobacterium
New,ReferenceOTU130	0	0	0	0	0	1.02013e-06	0	0.000219574	0.000124814	0	0	0	0	0	Bacteria; Proteobacteria; Epsilonproteobacteria; Campylobacterales; Helicobacteraceae; Sulfurovum; uncultured bacterium
New,CleanUp,ReferenceOTU560540	0	0	0	0	0	2.85636e-05	7.91956e-06	0	0	0.000304159	0	0	0	0	Unassigned
JN856062,1,1452	0	0	5.12337e-05	0	0	0.000227489	4.61974e-05	0	1.49777e-05	0	0	0	0	0	Bacteria; Aquificae; Aquificae; Aquificales; Hydrogenothermaceae
DQ228658,1,1410	0	0	7.79643e-06	0	0	0.000306038	2.24387e-05	0	3.32837e-06	0	0	0	0	0	Bacteria; Proteobacteria; Gammaproteobacteria
New,ReferenceOTU300	0	0	1.11378e-06	0	0	0.000334602	0	0	3.32837e-06	0	0	0	0	0	Bacteria; Proteobacteria; Epsilonproteobacteria; Nautiliales; Nautiliaceae; Caminibacter; uncultured bacterium
New,ReferenceOTU1879	0	0	4.4551e-06	0	0	0.0003193	0	1.41155e-05	0	0	0	0	0	0	Bacteria; Proteobacteria; Epsilonproteobacteria; Nautiliales; Nautiliaceae; Caminibacter; uncultured bacterium
New,CleanUp,ReferenceOTU99519	0	0	0	0	0	0.000323381	1.31993e-06	1.09787e-05	0	0	0	0	0	0	Bacteria; Proteobacteria; Epsilonproteobacteria; Campylobacterales; Helicobacteraceae; Sulfurovum; uncultured epsilon proteobacterium
New,CleanUp,ReferenceOTU750523	0	0	1.33653e-05	0	0	0.000230549	1.31993e-06	0	4.32688e-05	4.60846e-05	0	0	0	0	Bacteria; Aquificae; Aquificae; Aquificales; Desulfurobacteriaceae
New,CleanUp,ReferenceOTU258178	0	0	0	0	0	3.9785e-05	0.000233627	5.6462e-05	1.66418e-06	0	0	0	0	0	Bacteria; Proteobacteria; Epsilonproteobacteria; Campylobacterales; Helicobacteraceae; Sulfurimonas; uncultured bacterium
AB247822,1,918	0	0	0	0	0	7.34492e-05	0	0.000252511	3.32837e-06	0	0	0	0	0	Archaea; Euryarchaeota; Thermoplasmata; Thermoplasmatales; Deep Sea Hydrothermal Vent Gp 2(DHVEG-2)
New,CleanUp,ReferenceOTU963323	0	0	0	0	0	5.10064e-06	0	0.000316815	4.99255e-06	0	0	0	0	0	Bacteria; Proteobacteria; Epsilonproteobacteria; Campylobacterales; Helicobacteraceae; Sulfurimonas
New,ReferenceOTU1842	0	0	0	0	0	0.000146898	0	0.000172523	3.32837e-06	0	0	0	0	0	Bacteria; Proteobacteria; Epsilonproteobacteria; Nautiliales; Nautiliaceae; Caminibacter; uncultured bacterium
New,CleanUp,ReferenceOTU35750	0	0	0	0	0	3.57045e-05	6.59963e-06	0.000263489	1.66418e-05	0	0	0	0	0	Bacteria; Proteobacteria; Epsilonproteobacteria; Campylobacterales; Helicobacteraceae; Sulfurovum; uncultured epsilon proteobacterium
New,CleanUp,ReferenceOTU125620	0	0	0	0	0	0.00015914	1.31993e-06	0.000161544	0	0	0	0	0	0	Bacteria; Proteobacteria; Epsilonproteobacteria; Campylobacterales; Helicobacteraceae; Sulfurovum; uncultured bacterium
AM268745,1,1431	0	0	1.22515e-05	0	0	6.83486e-05	0.000223068	1.41155e-05	0	0	0	0	0	0	Bacteria; BD1-5; uncultured prokaryote; uncultured prokaryote; uncultured prokaryote; uncultured prokaryote; uncultured prokaryote
New,CleanUp,ReferenceOTU440726	4.4123e-06	0	0	0	0	0.000106093	7.91956e-06	0.000199185	0	0	0	0	0	0	Bacteria; Bacteroidetes; VC2,1 Bac22; uncultured bacterium; uncultured bacterium; uncultured bacterium; uncultured bacterium
New,CleanUp,ReferenceOTU336114	0	0	0	0	0	2.04026e-06	1.31993e-06	0	0	0.000313376	0	0	0	0	Unassigned
New,CleanUp,ReferenceOTU1122825	0	0	0	0	0	2.95837e-05	3.95978e-06	0	0	0.000282038	0	0	0	0	Bacteria; Aquificae; Aquificae; Aquificales; Desulfurobacteriaceae
New,CleanUp,ReferenceOTU40636	0	0	0	0	0	0	0	0.000310541	0	0	0	0	0	0	Unassigned
New,CleanUp,ReferenceOTU113585	0	0	0	0	0	0.000248911	1.97989e-05	4.07781e-05	0	0	0	0	0	0	Bacteria; Lentisphaerae; Lentisphaeria; Victivallales; Victivallaceae; Victivallis; uncultured organism
HQ636027,1,905	0	0	0	0	0	0	0	0	0	0.000307845	0	0	0	0	Archaea; Crenarchaeota; Thermoprotei; Fervidicoccales; Fervidicoccaceae; uncultured; uncultured archaeon
New,CleanUp,ReferenceOTU136415	0	0	1.44791e-05	0	0	4.08051e-06	1.8479e-05	4.70517e-06	7.98808e-05	0.000186182	0	0	0	0	Archaea; Euryarchaeota; Halobacteria; Halobacteriales; Deep Sea Euryarchaeotic Group(DSEG); uncultured euryarchaeote; uncultured euryarchaeote
New,ReferenceOTU858	0	0	1.11378e-06	0	0	7.65096e-05	0	5.01884e-05	0.000178068	0	0	0	0	0	Bacteria; Proteobacteria; Epsilonproteobacteria; Nautiliales; Nautiliaceae; Nautilia
New,CleanUp,ReferenceOTU1113010	0	0	4.4551e-06	0	0	0	0	0.000293289	4.99255e-06	1.84339e-06	0	0	0	0	Bacteria; Proteobacteria; Epsilonproteobacteria; Nautiliales; Nautiliaceae; Nitratifractor
New,CleanUp,ReferenceOTU481754	0	0	0	0	0	0	0	0.000246237	5.82464e-05	0	0	0	0	0	Bacteria; Proteobacteria; Gammaproteobacteria; Thiotrichales; Piscirickettsiaceae; Thiomicrospira; uncultured bacterium
New,CleanUp,ReferenceOTU264422	0	0	0	0	0	5.81473e-05	1.31993e-06	0.000244669	0	0	0	0	0	0	Bacteria; Proteobacteria; Epsilonproteobacteria; Campylobacterales; Helicobacteraceae; Sulfurovum
New,CleanUp,ReferenceOTU810100	0	0	0	0	0	2.24428e-05	1.31993e-06	0.000266626	1.33135e-05	0	0	0	0	0	Bacteria; Proteobacteria; Epsilonproteobacteria; Campylobacterales; Helicobacteraceae; Sulfurimonas; uncultured bacterium
New,CleanUp,ReferenceOTU1071458	0	0	1.11378e-06	0	0	3.67246e-05	3.95978e-06	0	0	0.000261761	0	0	0	0	Unassigned
New,CleanUp,ReferenceOTU1137336	0	0	0	2.45309e-06	0	5.91674e-05	3.95978e-06	0.000219574	1.8306e-05	0	0	0	0	0	Bacteria; Proteobacteria; Epsilonproteobacteria; Campylobacterales; Helicobacteraceae; Sulfurovum; uncultured bacterium
New,CleanUp,ReferenceOTU470606	0	0	0	0	0	8.16103e-06	0	0.000172523	0.000119821	0	0	0	0	0	Bacteria; Proteobacteria; Epsilonproteobacteria; Campylobacterales; Helicobacteraceae; Sulfurimonas; uncultured bacterium
New,CleanUp,ReferenceOTU494339	0	0	0	0	0	5.10064e-06	1.31993e-06	0.000290152	0	0	0	0	0	0	Unassigned
New,CleanUp,ReferenceOTU1014760	0	0	0	0	0	0.000259113	0	0	0	3.68677e-05	0	0	0	0	Bacteria; Aquificae; Aquificae; Aquificales; Aquificaceae
New,CleanUp,ReferenceOTU314461	0	0	0	0	0	0	0	2.97994e-05	0.000264605	0	0	0	0	0	Bacteria; Proteobacteria; Epsilonproteobacteria; Campylobacterales; Helicobacteraceae; Sulfurimonas; uncultured bacterium
New,CleanUp,ReferenceOTU508534	0	0	2.22755e-06	0	0	0.000279515	0	1.09787e-05	0	0	0	0	0	0	Bacteria; Proteobacteria; Epsilonproteobacteria; Campylobacterales; Helicobacteraceae; Sulfurovum
New,CleanUp,ReferenceOTU140791	0	0	0	0	0	6.12077e-06	0	3.76413e-05	0	0.000248857	0	0	0	0	Bacteria; TA06; uncultured bacterium; uncultured bacterium; uncultured bacterium; uncultured bacterium; uncultured bacterium
New,CleanUp,ReferenceOTU1058708	0	0	0	0	0	1.42818e-05	0	0.000276036	0	0	0	0	0	0	Bacteria; Proteobacteria; Epsilonproteobacteria; Nautiliales; Nautiliaceae; Lebetimonas
New,CleanUp,ReferenceOTU332173	0	0	4.78923e-05	0	0	9.5892e-05	1.18793e-05	0.000133313	0	0	0	0	0	0	Bacteria; Chlorobi; Ignavibacteria; Ignavibacteriales; IheB3-7; uncultured bacterium; uncultured bacterium
New,CleanUp,ReferenceOTU505385	0	0	0	0	0	0	0	0.000287015	0	1.84339e-06	0	0	0	0	Unassigned
New,CleanUp,ReferenceOTU301056	0	0	0	0	0	6.12077e-06	0	0.000277605	0	0	0	0	0	0	Bacteria; Caldiserica; Caldisericia; Caldisericales; Caldisericaceae; Caldisericum
New,ReferenceOTU2103	0	0	1.22515e-05	0	0	0.000183623	1.58391e-05	6.11672e-05	1.66418e-06	7.37354e-06	0	0	0	0	Bacteria; Proteobacteria; Epsilonproteobacteria; Campylobacterales; Helicobacteraceae; Sulfurovum; uncultured bacterium
FR754508,1,1482	0	0	0	0	0	0.000187704	0	9.25349e-05	0	0	0	0	0	0	Bacteria; Proteobacteria; Deltaproteobacteria; Desulfurellales; Desulfurellaceae; Hippea
New,ReferenceOTU1071	2.94153e-06	0	1.44791e-05	0	0	4.7946e-05	0.000211188	0	1.66418e-06	0	0	0	0	0	Bacteria; Proteobacteria; Gammaproteobacteria; Alteromonadales; Alteromonadaceae; Marinobacter
New,CleanUp,ReferenceOTU364375	0	0	0	0	0	0	5.01572e-05	0	0	0.000226736	0	0	0	0	Bacteria; Thermodesulfobacteria; Thermodesulfobacteria; Thermodesulfobacteriales; Thermodesulfobacteriaceae; Caldimicrobium; uncultured bacterium
New,CleanUp,ReferenceOTU1031591	0	0	0	0	0	0	0	0.000210164	6.49032e-05	0	0	0	0	0	Bacteria; Proteobacteria; Epsilonproteobacteria; Campylobacterales; Helicobacteraceae; Sulfurimonas; uncultured bacterium
GU390752,1,1470	0	0	0	0	0	6.42681e-05	6.73162e-05	0.000139587	3.32837e-06	0	0	0	0	0	Bacteria; Proteobacteria; Epsilonproteobacteria; Campylobacterales; Helicobacteraceae; Sulfurovum; uncultured epsilon proteobacterium
New,ReferenceOTU2064	0	0	0	0	0	9.18115e-06	0	0.000191343	6.98957e-05	1.84339e-06	0	0	0	0	Bacteria; Proteobacteria; Epsilonproteobacteria; Campylobacterales; Helicobacteraceae; Sulfurimonas; uncultured bacterium
New,CleanUp,ReferenceOTU49104	0	0	0	0	0	0.000104053	1.31993e-06	0.000159976	4.99255e-06	0	0	0	0	0	Bacteria; Proteobacteria; Epsilonproteobacteria; Nautiliales; Nautiliaceae; Nitratifractor
New,CleanUp,ReferenceOTU550533	0	0	0	0	0	0.000268294	0	1.56839e-06	0	0	0	0	0	0	Bacteria; Proteobacteria; Epsilonproteobacteria; Campylobacterales; Helicobacteraceae
New,CleanUp,ReferenceOTU509259	0	0	0	0	0	0	0	1.56839e-06	0.000266269	0	0	0	0	0	Bacteria; Proteobacteria; Epsilonproteobacteria; Nautiliales; Nautiliaceae; uncultured
New,CleanUp,ReferenceOTU170191	0	0	0	0	0	6.73285e-05	1.31993e-06	3.60729e-05	0.00016309	0	0	0	0	0	Bacteria; Proteobacteria; Epsilonproteobacteria; Campylobacterales; Helicobacteraceae; Sulfurimonas; uncultured bacterium
New,CleanUp,ReferenceOTU483963	0	0	0	0	0	0.000209126	3.69579e-05	2.03891e-05	0	0	0	0	0	0	Bacteria; Candidate division OD1; uncultured bacterium; uncultured bacterium; uncultured bacterium; uncultured bacterium; uncultured bacterium
New,ReferenceOTU1831	0	0	0	0	0	0	1.31993e-06	3.13678e-06	0	0.000261761	0	0	0	0	Bacteria; Thermodesulfobacteria; Thermodesulfobacteria; Thermodesulfobacteriales; Thermodesulfobacteriaceae; Caldimicrobium; uncultured bacterium
New,CleanUp,ReferenceOTU1071090	0	0	0	0	0	6.93687e-05	0	0.000192912	1.66418e-06	0	0	0	0	0	Bacteria; Proteobacteria; Epsilonproteobacteria; Nautiliales; Nautiliaceae; Caminibacter
New,CleanUp,ReferenceOTU1039769	0	0	0	0	0	0	0	0	0	0.000261761	0	0	0	0	Unassigned
New,CleanUp,ReferenceOTU903315	0	0	3.4527e-05	0	0	8.56908e-05	2.24387e-05	9.41033e-06	0	0.00010876	0	0	0	0	Unassigned
New,ReferenceOTU2132	0	0	0	0	0	0	0	0	0.000259613	0	0	0	0	0	Unassigned
New,CleanUp,ReferenceOTU732005	0	0	1.11378e-06	0	0	0.000254012	2.63985e-06	1.56839e-06	0	0	0	0	0	0	Bacteria; Proteobacteria; Gammaproteobacteria; Thiotrichales; Piscirickettsiaceae; Thiomicrospira; uncultured gamma proteobacterium
New,CleanUp,ReferenceOTU751965	0	0	0	0	0	6.52882e-05	2.50786e-05	0.000128608	3.66121e-05	0	0	0	0	0	Bacteria; Proteobacteria; Epsilonproteobacteria; Campylobacterales; Helicobacteraceae; Sulfurimonas
AF367482,1,1328	0	1.58255e-06	0	0	0	1.83623e-05	6.07166e-05	0.000108219	6.65674e-05	0	0	0	0	0	Bacteria; BD1-5; uncultured bacterium; uncultured bacterium; uncultured bacterium; uncultured bacterium; uncultured bacterium
FR853061,1,1484	0	0	0	0	0	0.000193824	5.14771e-05	9.41033e-06	0	0	0	0	0	0	Bacteria; Bacteroidetes; Sphingobacteriia; Sphingobacteriales; WCHB1-69
New,CleanUp,ReferenceOTU552493	0	0	0	0	0	0	0	0	0	0.000254387	0	0	0	0	Bacteria; Proteobacteria; Deltaproteobacteria; Syntrophobacterales; Syntrophobacteraceae
New,CleanUp,ReferenceOTU417468	0	0	0	0	0	2.55032e-05	3.95978e-06	0.000216438	8.32092e-06	0	0	0	0	0	Bacteria; Bacteroidetes; Flavobacteriia; Flavobacteriales; Schleiferiaceae; Schleiferia; uncultured Bacteroidetes bacterium
New,CleanUp,ReferenceOTU1094393	0	0	0	0	0	4.18253e-05	1.31993e-06	0.000141155	6.98957e-05	0	0	0	0	0	Bacteria; Proteobacteria; Epsilonproteobacteria; Campylobacterales; Helicobacteraceae; Sulfurimonas
New,CleanUp,ReferenceOTU229393	0	0	0	0	0	7.957e-05	0	0.000172523	0	0	0	0	0	0	Bacteria; Proteobacteria; Epsilonproteobacteria; Nautiliales; Nautiliaceae; Nitratifractor; uncultured bacterium
New,CleanUp,ReferenceOTU338390	0	0	0	0	0	0	0	2.66626e-05	0.000224665	0	0	0	0	0	Bacteria; Proteobacteria; Epsilonproteobacteria; Campylobacterales; Helicobacteraceae; Sulfurimonas
New,ReferenceOTU2463	0	0	0	0	0	1.63221e-05	6.59963e-06	0.000218006	6.65674e-06	0	0	0	0	0	Bacteria; Proteobacteria; Epsilonproteobacteria; Campylobacterales; Helicobacteraceae; Sulfurimonas
New,ReferenceOTU578	0	0	0	0	0	4.89662e-05	5.27971e-06	0.000178796	1.33135e-05	0	0	0	0	0	Bacteria; Proteobacteria; Epsilonproteobacteria; Campylobacterales; Helicobacteraceae; Sulfurimonas; uncultured epsilon proteobacterium
New,CleanUp,ReferenceOTU142452	0	0	0	0	0	0.00023565	0	4.70517e-06	4.99255e-06	0	0	0	0	0	Bacteria; Proteobacteria; Epsilonproteobacteria; Nautiliales; Nautiliaceae; Lebetimonas
JX521734,1,1489	0	0	0	0	0	0.000144858	7.52358e-05	2.35258e-05	0	0	0	0	0	0	Bacteria; Proteobacteria; Epsilonproteobacteria; Campylobacterales; Campylobacteraceae; Arcobacter; uncultured epsilon proteobacterium
New,CleanUp,ReferenceOTU585661	0	0	2.22755e-06	0	0	4.08051e-06	7.91956e-06	0.000228985	0	0	0	0	0	0	Bacteria; Proteobacteria; Epsilonproteobacteria; Campylobacterales; Helicobacteraceae; Sulfurimonas; uncultured bacterium
EF644801,1,1336	0	0	0	0	0	5.71272e-05	7.91956e-06	3.13678e-05	0.000146448	0	0	0	0	0	Bacteria; Proteobacteria; Epsilonproteobacteria; Campylobacterales; Helicobacteraceae; Sulfurimonas; uncultured bacterium
New,CleanUp,ReferenceOTU681354	0	0	0	0	0	1.93824e-05	0	8.93982e-05	0.000133135	0	0	0	0	0	Bacteria; Proteobacteria; Epsilonproteobacteria; Nautiliales; Nautiliaceae; uncultured; uncultured proteobacterium
New,CleanUp,ReferenceOTU1121402	0	0	0	0	0	6.93687e-05	1.31993e-06	0.000169386	1.66418e-06	0	0	0	0	0	Bacteria; Proteobacteria; Epsilonproteobacteria; Campylobacterales; Helicobacteraceae; Sulfurovum; uncultured bacterium
New,CleanUp,ReferenceOTU928227	0	0	0	0	0	0	0	0	0	0.000235953	0	0	0	0	Bacteria; Elusimicrobia; Elusimicrobia; Lineage IV; uncultured bacterium; uncultured bacterium; uncultured bacterium
New,CleanUp,ReferenceOTU41906	0	0	0	0	0	1.02013e-06	0	3.92097e-05	0.00019471	0	0	0	0	0	Bacteria; Proteobacteria; Epsilonproteobacteria; Campylobacterales; Campylobacteraceae; Sulfurospirillum; uncultured bacterium
New,CleanUp,ReferenceOTU1014569	0	0	0	0	0	3.06038e-06	5.27971e-06	1.56839e-05	0.000209687	0	0	0	0	0	Bacteria; Proteobacteria; Epsilonproteobacteria; Nautiliales; Nautiliaceae; uncultured; uncultured proteobacterium
JQ712409,1,1382	0	0	8.9102e-06	0	6.5084e-06	5.10064e-05	6.20365e-05	9.41033e-06	3.32837e-06	9.21693e-05	0	0	0	0	Bacteria; Proteobacteria; Epsilonproteobacteria; Campylobacterales; Campylobacteraceae; Arcobacter; uncultured epsilon proteobacterium
New,CleanUp,ReferenceOTU1025152	0	0	0	0	0	2.55032e-05	0	0.00018507	1.99702e-05	1.84339e-06	0	0	0	0	Bacteria; Proteobacteria; Epsilonproteobacteria; Campylobacterales; Helicobacteraceae; Sulfurimonas; uncultured bacterium
New,CleanUp,ReferenceOTU656208	0	0	2.22755e-06	0	0	0.000212187	1.45192e-05	1.56839e-06	1.66418e-06	0	0	0	0	0	Bacteria; Proteobacteria; Epsilonproteobacteria; Campylobacterales; Helicobacteraceae; Sulfurovum; uncultured bacterium
New,CleanUp,ReferenceOTU246626	0	0	0	0	0	2.04026e-06	0	0.000189775	3.99404e-05	0	0	0	0	0	Bacteria; Proteobacteria; Epsilonproteobacteria; Nautiliales; Nautiliaceae; Nitratifractor
New,CleanUp,ReferenceOTU27647	0	0	1.11378e-06	0	0	0.000167301	2.63985e-05	3.45046e-05	1.66418e-06	0	0	0	0	0	Bacteria; Proteobacteria; Epsilonproteobacteria; Campylobacterales; Helicobacteraceae; Sulfurimonas
New,ReferenceOTU914	0	0	2.22755e-05	0	0	1.53019e-05	0	0.000169386	1.49777e-05	7.37354e-06	0	0	0	0	Bacteria; Proteobacteria; Epsilonproteobacteria; Nautiliales; Nautiliaceae; Nitratifractor; uncultured bacterium
AF068806,1,1452	0	0	0	0	0	0	0	1.25471e-05	0.000216344	0	0	0	0	0	Bacteria; Proteobacteria; Epsilonproteobacteria; Campylobacterales; Helicobacteraceae; Sulfurimonas; uncultured bacterium
New,CleanUp,ReferenceOTU651483	0	0	0	0	0	2.04026e-06	0	0.000119198	9.98511e-05	0	0	0	0	0	Bacteria; Proteobacteria; Epsilonproteobacteria; Campylobacterales; Campylobacteraceae; Sulfurospirillum; uncultured bacterium
New,CleanUp,ReferenceOTU495095	0	0	0	0	0	6.12077e-06	2.63985e-06	0.000210164	0	0	0	0	0	0	Unassigned
New,CleanUp,ReferenceOTU212201	0	0	0	0	0	2.14227e-05	0	2.35258e-05	0.000173075	0	0	0	0	0	Bacteria; Proteobacteria; Epsilonproteobacteria; Campylobacterales; Helicobacteraceae; Sulfurimonas
New,CleanUp,ReferenceOTU16613	0	0	0	0	0	6.12077e-06	0	0.000208596	0	0	0	0	0	0	Unassigned
New,CleanUp,ReferenceOTU1129266	0	0	0	0	0	7.54895e-05	3.95978e-06	0.000134881	0	0	0	0	0	0	Bacteria; Proteobacteria; Epsilonproteobacteria; Campylobacterales; Helicobacteraceae; Sulfurovum; uncultured epsilon proteobacterium
New,CleanUp,ReferenceOTU344644	0	0	0	0	0	1.12214e-05	0	0.000164681	3.82762e-05	0	0	0	0	0	Bacteria; Proteobacteria; Epsilonproteobacteria; Campylobacterales; Helicobacteraceae; Sulfurimonas; uncultured bacterium
New,CleanUp,ReferenceOTU726760	0	0	0	0	0	0	0	0.000174091	3.99404e-05	0	0	0	0	0	Unassigned
New,CleanUp,ReferenceOTU610864	0	0	1.33653e-05	0	0	0.000122415	3.03583e-05	4.70517e-05	0	0	0	0	0	0	Bacteria; Spirochaetae; Spirochaetes; Spirochaetales; PL-11B10
AB235239,1,1418	0	0	0	0	0	0.000111194	9.37148e-05	7.84194e-06	0	0	0	0	0	0	Bacteria; Proteobacteria; Epsilonproteobacteria; Campylobacterales; Helicobacteraceae; Sulfurimonas; uncultured bacterium
New,ReferenceOTU1474	0	0	0	0	0	5.20265e-05	0	0.000133313	2.49628e-05	1.84339e-06	0	0	0	0	Bacteria; Proteobacteria; Epsilonproteobacteria; Campylobacterales; Helicobacteraceae; Sulfurimonas; uncultured Sulfurimonas sp,
New,CleanUp,ReferenceOTU209446	0	0	0	0	0	0	0	0	0	0.000211989	0	0	0	0	Unassigned
New,CleanUp,ReferenceOTU151224	0	0	0	0	0	9.48719e-05	3.95978e-06	0.000112924	0	0	0	0	0	0	Bacteria; Proteobacteria; Epsilonproteobacteria; Campylobacterales; Helicobacteraceae; Sulfurovum; uncultured bacterium
New,CleanUp,ReferenceOTU11180	0	0	0	0	0	1.63221e-05	0	0.000189775	4.99255e-06	0	0	0	0	0	Bacteria; Proteobacteria; Epsilonproteobacteria; Nautiliales; Nautiliaceae
New,CleanUp,ReferenceOTU1035823	0	0	0	0	0	0	5.93967e-05	0	0	0.000151158	0	0	0	0	Bacteria; Proteobacteria; Epsilonproteobacteria; Nautiliales; Nautiliaceae; Caminibacter; uncultured bacterium
New,CleanUp,ReferenceOTU112968	0	0	4.4551e-06	0	0	0.0001571	2.63985e-06	2.03891e-05	0	2.58074e-05	0	0	0	0	Bacteria; Proteobacteria; Epsilonproteobacteria; Campylobacterales; Helicobacteraceae; Sulfurovum; uncultured bacterium
New,CleanUp,ReferenceOTU1017550	0	0	0	0	0	0	0	2.03891e-05	0.000189717	0	0	0	0	0	Archaea; Euryarchaeota; Archaeoglobi; Archaeoglobales; Archaeoglobaceae; uncultured; uncultured archaeon
JN662268,1,1369	0	0	0	0	0	0.000124456	1.97989e-05	3.13678e-06	6.15748e-05	0	0	0	0	0	Bacteria; Proteobacteria; Epsilonproteobacteria; Campylobacterales; Campylobacteraceae; Campylobacter
New,CleanUp,ReferenceOTU464507	0	0	0	0	0	2.04026e-06	0	0.000205459	0	0	0	0	0	0	Unassigned
New,CleanUp,ReferenceOTU373278	0	0	0	0	0	5.50869e-05	4.88373e-05	3.13678e-06	9.98511e-05	0	0	0	0	0	Bacteria; Proteobacteria; Gammaproteobacteria; Alteromonadales; Colwelliaceae; Colwellia
New,CleanUp,ReferenceOTU528487	0	0	0	0	0	0.000188724	0	1.25471e-05	4.99255e-06	0	0	0	0	0	Bacteria; Proteobacteria; Epsilonproteobacteria; Nautiliales; Nautiliaceae; Caminibacter; uncultured bacterium
New,ReferenceOTU71	3.82399e-05	1.10779e-05	0.000115833	1.3492e-05	0	7.1409e-06	3.95978e-06	0	0	1.29037e-05	0	0	0	0	Unassigned
New,CleanUp,ReferenceOTU772699	0	0	1.11378e-05	0	0	7.957e-05	4.09177e-05	0	0	7.00487e-05	0	0	0	0	Bacteria; Candidate division OD1; uncultured bacterium; uncultured bacterium; uncultured bacterium; uncultured bacterium; uncultured bacterium
M59932,1,1477	0	0	0	0	0	0	0	0	0	0.000200929	0	0	0	0	Archaea; Euryarchaeota; Methanopyri; Methanopyrales; Methanopyraceae; Methanopyrus; Methanopyrus kandleri
JN662167,1,1374	0	0	5.56888e-06	0	0	0.000164241	1.31993e-05	1.41155e-05	0	3.68677e-06	0	0	0	0	Bacteria; Proteobacteria; Epsilonproteobacteria; Nautiliales; Nautiliaceae; Nitratifractor; uncultured epsilon proteobacterium
New,CleanUp,ReferenceOTU946377	0	0	2.22755e-06	0	0	0.000110174	1.05594e-05	7.21459e-05	0	5.53016e-06	0	0	0	0	Bacteria; Proteobacteria; Epsilonproteobacteria; Campylobacterales; Helicobacteraceae; Sulfurovum; uncultured epsilon proteobacterium
New,CleanUp,ReferenceOTU294950	0	0	0	0	0	4.18253e-05	0	0.00015527	3.32837e-06	0	0	0	0	0	Bacteria; Proteobacteria; Epsilonproteobacteria; Campylobacterales; Helicobacteraceae; Sulfurovum; uncultured bacterium
New,CleanUp,ReferenceOTU58337	0	0	0	1.22655e-06	0	1.02013e-06	0	0	0	0.000193556	0	0	0	0	Bacteria; Thermotogae; Thermotogae; Thermotogales; Thermotogaceae; EM3; uncultured bacterium
New,CleanUp,ReferenceOTU17427	0	0	0	0	0	0	0	0	0	0.000193556	0	0	0	0	Unassigned
New,CleanUp,ReferenceOTU671232	0	0	4.4551e-06	0	0	3.9785e-05	0.000130673	0	1.16493e-05	5.53016e-06	0	0	0	0	Unassigned
New,CleanUp,ReferenceOTU224030	0	0	0	0	0	1.32617e-05	0	0.000178796	0	0	0	0	0	0	Bacteria; Proteobacteria; Epsilonproteobacteria; Nautiliales; Nautiliaceae; Lebetimonas
New,ReferenceOTU2257	0	0	0	0	0	2.04026e-06	0	0.000189775	0	0	0	0	0	0	Bacteria; Proteobacteria; Deltaproteobacteria; Desulfurellales; Desulfurellaceae; Hippea
New,CleanUp,ReferenceOTU223097	0	0	0	0	0	6.12077e-06	0	0.00018507	0	0	0	0	0	0	Bacteria; Proteobacteria; Epsilonproteobacteria; Campylobacterales; Helicobacteraceae; Sulfurimonas; uncultured bacterium
New,CleanUp,ReferenceOTU572126	0	0	0	0	0	4.08051e-05	2.63985e-06	0.000147429	0	0	0	0	0	0	Bacteria; Thermodesulfobacteria; Thermodesulfobacteria; Thermodesulfobacteriales; Thermodesulfobacteriaceae; PS-B30; uncultured bacterium
New,CleanUp,ReferenceOTU932323	0	0	0	0	0	4.08051e-06	2.63985e-06	0.000183501	0	0	0	0	0	0	Bacteria; Acidobacteria; Holophagae; Acanthopleuribacterales; Acanthopleuribacteraceae; Thermotomaculum; uncultured bacterium
HM041955,1,1543	0	0	0	0	0	2.04026e-06	0	0	0	0.000188025	0	0	0	0	Bacteria; Caldiserica; Caldisericia; Caldisericales; TTA-B1
New,ReferenceOTU1223	0	0	0	0	0	0	0	0	0	0.000189869	0	0	0	0	Bacteria; Thermotogae; Thermotogae; Thermotogales; Thermotogaceae; EM3; uncultured bacterium
New,CleanUp,ReferenceOTU209371	0	0	0	0	0	0	0	0	0	0.000189869	0	0	0	0	Bacteria; Aquificae; Aquificae; Aquificales; Desulfurobacteriaceae; Desulfurobacterium
New,CleanUp,ReferenceOTU8523	0	0	0	0	0	1.83623e-05	0.000150472	1.72523e-05	1.66418e-06	0	0	0	0	0	Bacteria; Proteobacteria; Epsilonproteobacteria; Campylobacterales; Helicobacteraceae; Sulfurimonas; uncultured bacterium
New,CleanUp,ReferenceOTU882034	0	0	0	0	0	7.1409e-06	0	0.000178796	0	0	0	0	0	0	Bacteria; Proteobacteria; Epsilonproteobacteria; Campylobacterales; Helicobacteraceae; Sulfurimonas; uncultured bacterium
New,CleanUp,ReferenceOTU406904	0	0	0	0	0.000182235	0	0	0	3.32837e-06	0	0	0	0	0	Bacteria; Proteobacteria; Deltaproteobacteria; Myxococcales; 0319-6G20; uncultured bacterium; uncultured bacterium
New,CleanUp,ReferenceOTU314919	0	0	1.11378e-06	0	0	0.000172402	0	0	1.66418e-06	9.21693e-06	0	0	0	0	Bacteria; Aquificae; Aquificae; Aquificales; Aquificaceae
New,CleanUp,ReferenceOTU801168	0	0	0	0	0	2.44831e-05	5.4117e-05	0	0	0.000105073	0	0	0	0	Bacteria; Candidate division OD1; uncultured bacterium; uncultured bacterium; uncultured bacterium; uncultured bacterium; uncultured bacterium
CP002543,1425680,1427250	0	0	1.11378e-06	0	0	0.0001571	3.95978e-06	4.70517e-06	1.66418e-06	1.47471e-05	0	0	0	0	Bacteria; Aquificae; Aquificae; Aquificales; Desulfurobacteriaceae; Desulfurobacterium
FJ628224,1,1473	0	0	0	0	0	0.000118335	1.58391e-05	4.39149e-05	4.99255e-06	0	0	0	0	0	Bacteria; Proteobacteria; Epsilonproteobacteria; Campylobacterales; Helicobacteraceae; Sulfurimonas; uncultured bacterium
New,CleanUp,ReferenceOTU807316	0	0	7.57367e-05	0	0	8.16103e-05	5.27971e-06	2.03891e-05	0	0	0	0	0	0	Bacteria; Bacteroidetes; Flavobacteriia; Flavobacteriales; Flavobacteriaceae; Maritimimonas; uncultured bacterium
New,CleanUp,ReferenceOTU605213	0	0	0	0	0	3.77447e-05	0.000104274	4.07781e-05	0	0	0	0	0	0	Bacteria; Proteobacteria; Epsilonproteobacteria; Campylobacterales; Campylobacteraceae; Arcobacter
New,CleanUp,ReferenceOTU132839	0	0	0	0	0	0	2.63985e-06	4.86201e-05	0.000131471	0	0	0	0	0	Bacteria; Proteobacteria; Deltaproteobacteria; Desulfurellales; Desulfurellaceae; Hippea
New,CleanUp,ReferenceOTU1096123	1.47077e-06	0	6.57128e-05	0	0	1.22415e-05	8.84351e-05	7.84194e-06	3.32837e-06	3.68677e-06	0	0	0	0	Bacteria; Proteobacteria; Epsilonproteobacteria; Campylobacterales; Helicobacteraceae; Sulfurovum; uncultured epsilon proteobacterium
New,CleanUp,ReferenceOTU620479	0	0	0	0	0	5.10064e-06	0	0.000177228	0	0	0	0	0	0	Bacteria; Bacteroidetes; VC2,1 Bac22; uncultured bacterium; uncultured bacterium; uncultured bacterium; uncultured bacterium
New,CleanUp,ReferenceOTU381683	0	0	0	0	0	0	0	0.000181933	0	0	0	0	0	0	Unassigned
New,CleanUp,ReferenceOTU735388	0	0	1.11378e-06	0	0	9.28317e-05	0	7.21459e-05	1.49777e-05	0	0	0	0	0	Bacteria; Proteobacteria; Epsilonproteobacteria; Nautiliales; Nautiliaceae; Nitratifractor
New,CleanUp,ReferenceOTU638686	0	0	0	0	0	3.9785e-05	0	0.000117629	2.16344e-05	1.84339e-06	0	0	0	0	Bacteria; Proteobacteria; Epsilonproteobacteria; Nautiliales; Nautiliaceae
New,CleanUp,ReferenceOTU212819	0	0	1.11378e-06	0	0	7.85499e-05	0	9.72401e-05	3.32837e-06	0	0	0	0	0	Bacteria; Proteobacteria; Epsilonproteobacteria; Campylobacterales; Helicobacteraceae; Sulfurovum; uncultured bacterium
EU265788,1,1519	0	0	1.67066e-05	0	0	0.000119355	2.77185e-05	1.56839e-05	0	0	0	0	0	0	Bacteria; Proteobacteria; Deltaproteobacteria; Desulfobacterales; Desulfobulbaceae; Desulfocapsa; uncultured delta proteobacterium
New,CleanUp,ReferenceOTU960342	0	0	0	0	0	0.000172402	0	4.70517e-06	1.66418e-06	0	0	0	0	0	Bacteria; Proteobacteria; Epsilonproteobacteria; Nautiliales; Nautiliaceae; uncultured; uncultured epsilon proteobacterium
New,CleanUp,ReferenceOTU557312	0	0	0.000105809	0	0	2.95837e-05	0	3.92097e-05	3.32837e-06	0	0	0	0	0	Bacteria; Proteobacteria; Epsilonproteobacteria; Nautiliales; Nautiliaceae; Caminibacter; uncultured bacterium
New,CleanUp,ReferenceOTU60078	0	0	0	0	0	0	0	0.000141155	3.66121e-05	0	0	0	0	0	Bacteria; Proteobacteria; Epsilonproteobacteria; Campylobacterales; Helicobacteraceae; Sulfurovum; uncultured bacterium
New,ReferenceOTU1122	0	0	0	0	0	6.83486e-05	0	0.000108219	0	0	0	0	0	0	Bacteria; Proteobacteria; Epsilonproteobacteria; Nautiliales; Nautiliaceae; uncultured; uncultured epsilon proteobacterium
New,CleanUp,ReferenceOTU142885	0	0	0	0	0	9.18115e-06	0	0	0.000166418	0	0	0	0	0	Bacteria; Proteobacteria; Epsilonproteobacteria; Nautiliales; Nautiliaceae; uncultured; uncultured bacterium
New,ReferenceOTU2544	0	0	0	0	0	0	0	1.72523e-05	0.000158098	0	0	0	0	0	Bacteria; Proteobacteria; Epsilonproteobacteria; Campylobacterales; Helicobacteraceae; Sulfurimonas
New,ReferenceOTU2328	0	0	0	0	0	0	0	3.13678e-06	0	0.000171435	0	0	0	0	Bacteria; Proteobacteria; Epsilonproteobacteria; Nautiliales; Nautiliaceae; Nitratifractor; uncultured bacterium
New,CleanUp,ReferenceOTU799235	0	0	0	0	0	0	0	0	0	0.000171435	0	0	0	0	Bacteria; Proteobacteria; Deltaproteobacteria; Desulfarculales; Desulfarculaceae; Desulfarculus
New,CleanUp,ReferenceOTU994670	0	0	1.11378e-05	0	0	0.000139758	0	1.09787e-05	8.32092e-06	0	0	0	0	0	Bacteria; Proteobacteria; Epsilonproteobacteria; Nautiliales; Nautiliaceae; Thioreductor
New,CleanUp,ReferenceOTU856586	0	0	0	0	0	0	0	0.000169386	0	0	0	0	0	0	Unassigned
AB095129,1,1070	0	0	0	0	0	0	1.31993e-06	3.13678e-06	3.32837e-05	0.00013088	0	0	0	0	Archaea; Euryarchaeota; Thermococci; Thermococcales; Thermococcaceae
New,ReferenceOTU1860	0	0	1.11378e-06	0	0	6.73285e-05	5.27971e-05	4.70517e-05	0	0	0	0	0	0	Unassigned
New,CleanUp,ReferenceOTU459519	0	0	0	0	0	0	0	0.000167818	0	0	0	0	0	0	Unassigned
New,CleanUp,ReferenceOTU983081	0	0	0	0	0	4.08051e-06	6.59963e-06	0.000156839	0	0	0	0	0	0	Unassigned
AY280435,1,1423	0	0	0	0	0	7.957e-05	0	8.78298e-05	0	0	0	0	0	0	Bacteria; Proteobacteria; Epsilonproteobacteria; Campylobacterales; Helicobacteraceae; Sulfurovum; uncultured epsilon proteobacterium
JQ912654,1,1273	0	0	2.22755e-06	0	0.000135592	1.42818e-05	1.05594e-05	4.70517e-06	0	0	0	0	0	0	Bacteria; Proteobacteria; Epsilonproteobacteria; Campylobacterales; Helicobacteraceae; Sulfurimonas; uncultured bacterium
New,CleanUp,ReferenceOTU120357	0	0	3.89821e-05	0	4.33894e-06	6.32479e-05	2.11188e-05	3.92097e-05	0	0	0	0	0	0	Unassigned
New,ReferenceOTU1529	0	0	0	0	0	5.10064e-05	3.95978e-06	3.76413e-05	7.32241e-05	0	0	0	0	0	Bacteria; Proteobacteria; Epsilonproteobacteria; Campylobacterales; Helicobacteraceae; Sulfurimonas
New,CleanUp,ReferenceOTU563631	0	0	2.22755e-06	0	0	0	0	0.000163112	0	0	0	0	0	0	Bacteria; Bacteroidetes; Flavobacteriia; Flavobacteriales; R103-B20; uncultured Bacteroidetes bacterium; uncultured Bacteroidetes bacterium
New,CleanUp,ReferenceOTU149132	0	0	0	0	0	0	0	0	0	0.000164061	0	0	0	0	Bacteria; Thermodesulfobacteria; Thermodesulfobacteria; Thermodesulfobacteriales; Thermodesulfobacteriaceae; Thermodesulfatator
New,ReferenceOTU1365	0	0	1.11378e-06	0	0	7.1409e-06	0.000125393	2.19574e-05	0	7.37354e-06	0	0	0	0	Bacteria; Proteobacteria; Epsilonproteobacteria; Campylobacterales; Helicobacteraceae; Sulfurovum; uncultured bacterium
New,CleanUp,ReferenceOTU919982	0	0	0	0	0	2.04026e-06	0	4.70517e-05	0.000113165	0	0	0	0	0	Bacteria; Proteobacteria; Epsilonproteobacteria; Campylobacterales; Helicobacteraceae; Sulfurimonas; uncultured bacterium
New,CleanUp,ReferenceOTU230456	0	0	0	0	0	3.06038e-06	0	0.000158407	0	0	0	0	0	0	Bacteria; Proteobacteria; Epsilonproteobacteria; Campylobacterales; Helicobacteraceae; Sulfurovum; uncultured epsilon proteobacterium
New,ReferenceOTU846	0	0	0	0	0	2.75435e-05	0	0.000130176	3.32837e-06	0	0	0	0	0	Bacteria; Proteobacteria; Epsilonproteobacteria; Nautiliales; Nautiliaceae; uncultured; uncultured proteobacterium
New,CleanUp,ReferenceOTU1109796	0	0	0	0	0	0.000135677	6.59963e-06	1.25471e-05	4.99255e-06	0	0	0	0	0	Bacteria; Proteobacteria; Epsilonproteobacteria; Campylobacterales; Helicobacteraceae; Sulfurovum; uncultured bacterium
JN874117,1,1410	0	0	3.34133e-06	0	0	0.000126496	0	2.50942e-05	1.66418e-06	1.84339e-06	0	0	0	0	Bacteria; Proteobacteria; Epsilonproteobacteria; Nautiliales; Nautiliaceae; Caminibacter
New,ReferenceOTU1290	0	0	0	0	0	0	0	0.000134881	2.32986e-05	0	0	0	0	0	Unassigned
New,ReferenceOTU1677	0	0	0	0	0	0.000148939	1.31993e-06	7.84194e-06	0	0	0	0	0	0	Bacteria; Proteobacteria; Epsilonproteobacteria; Campylobacterales; Helicobacteraceae; Sulfurovum
New,CleanUp,ReferenceOTU133404	0	0	0	0	0	0	0	0	0	0.000156688	0	0	0	0	Archaea; Nanoarchaeota; Nanoarchaeota Incertae Sedis; Unknown Order; Unknown Family; Nanoarchaeum; uncultured nanoarchaeote
New,CleanUp,ReferenceOTU1058407	0	0	4.4551e-06	0	0	2.14227e-05	0.000126713	0	3.32837e-06	0	0	0	0	0	Bacteria; BD1-5; uncultured bacterium; uncultured bacterium; uncultured bacterium; uncultured bacterium; uncultured bacterium
New,ReferenceOTU485	0	0	0	0	0	3.87649e-05	0.000112194	4.70517e-06	0	0	0	0	0	0	Bacteria; Proteobacteria; Epsilonproteobacteria; Campylobacterales; Helicobacteraceae; Sulfurovum; uncultured epsilon proteobacterium
New,CleanUp,ReferenceOTU173296	0	0	0	0	0	0	0	0.00015527	0	0	0	0	0	0	Bacteria; Proteobacteria; Gammaproteobacteria; Thiotrichales; Piscirickettsiaceae; Thiomicrospira; uncultured bacterium
AB070215,1,1304	0	0	0	0	0.000126914	0	0	0	0	2.76508e-05	0	0	0	0	Bacteria; Proteobacteria; JTB23; uncultured bacterium; uncultured bacterium; uncultured bacterium; uncultured bacterium
New,CleanUp,ReferenceOTU815611	0	0	0	0	0	3.06038e-06	0	0.000150565	0	0	0	0	0	0	Bacteria; Proteobacteria; Gammaproteobacteria; Thiotrichales; Piscirickettsiaceae; Thiomicrospira; uncultured gamma proteobacterium
New,CleanUp,ReferenceOTU838351	0	0	0	0	0	5.10064e-06	0	2.66626e-05	0.000121485	0	0	0	0	0	Bacteria; Proteobacteria; Epsilonproteobacteria; Campylobacterales; Helicobacteraceae; Sulfurimonas; uncultured bacterium
New,CleanUp,ReferenceOTU752486	0	0	3.34133e-06	0	0	0.000145878	0	0	0	3.68677e-06	0	0	0	0	Bacteria; Aquificae; Aquificae; Aquificales; Desulfurobacteriaceae; Desulfurobacterium
New,CleanUp,ReferenceOTU422969	0	0	0	0	0	8.16103e-06	0	0.000120766	1.8306e-05	5.53016e-06	0	0	0	0	Bacteria; Proteobacteria; Epsilonproteobacteria; Nautiliales; Nautiliaceae; Nitratifractor; uncultured bacterium
New,ReferenceOTU2606	0	0	0	0	0	0.000106093	2.63985e-06	4.39149e-05	0	0	0	0	0	0	Bacteria; Proteobacteria; Epsilonproteobacteria; Campylobacterales; Helicobacteraceae; Sulfurovum; uncultured bacterium
New,ReferenceOTU818	0	0	5.56888e-06	0	0	5.20265e-05	8.71151e-05	0	6.65674e-06	0	0	0	0	0	Bacteria; Proteobacteria; Epsilonproteobacteria; Campylobacterales; Campylobacteraceae; Campylobacter; uncultured epsilon proteobacterium
New,CleanUp,ReferenceOTU253134	0	0	0	0	0.00010088	2.85636e-05	1.8479e-05	0	3.32837e-06	0	0	0	0	0	Bacteria; Proteobacteria; Epsilonproteobacteria; Campylobacterales; Helicobacteraceae; Sulfurimonas; uncultured bacterium
HM823892,1,1286	0	0	0	0	0	0	0	0	0	0.000151158	0	0	0	0	Bacteria; Proteobacteria; Alphaproteobacteria; Rhodobacterales; Rhodobacteraceae; Paracoccus
New,CleanUp,ReferenceOTU878453	0	0	0	0	0	0	1.31993e-06	0	1.66418e-06	0.000147471	0	0	0	0	Bacteria; Thermotogae; Thermotogae; Thermotogales; Thermotogaceae; Thermotoga
New,ReferenceOTU2557	0	0	3.34133e-06	0	0	0.000140778	1.31993e-06	3.13678e-06	1.66418e-06	0	0	0	0	0	Bacteria; Proteobacteria; Epsilonproteobacteria; Campylobacterales; Helicobacteraceae; Sulfurovum; uncultured bacterium
New,CleanUp,ReferenceOTU24318	0	0	8.9102e-06	0	0	2.75435e-05	0.000104274	9.41033e-06	0	0	0	0	0	0	Bacteria; Candidate division OD1; uncultured bacterium; uncultured bacterium; uncultured bacterium; uncultured bacterium; uncultured bacterium
New,CleanUp,ReferenceOTU791934	0	0	3.34133e-06	0	0	0.000141798	0	3.13678e-06	1.66418e-06	0	0	0	0	0	Bacteria; Proteobacteria; Epsilonproteobacteria; Nautiliales; Nautiliaceae; Caminibacter; uncultured bacterium
New,CleanUp,ReferenceOTU798852	0	0	0	0	0	2.14227e-05	6.07166e-05	6.74407e-05	0	0	0	0	0	0	Bacteria; Proteobacteria; Epsilonproteobacteria; Campylobacterales; Campylobacteraceae; Arcobacter; uncultured epsilon proteobacterium
New,CleanUp,ReferenceOTU1121018	0	0	0	0	0	5.10064e-06	0	0.000142723	1.66418e-06	0	0	0	0	0	Bacteria; Proteobacteria; Epsilonproteobacteria; Campylobacterales; Helicobacteraceae; Sulfurovum; uncultured epsilon proteobacterium
New,ReferenceOTU1427	0	0	0	0	0	1.73422e-05	0	0.000127039	4.99255e-06	0	0	0	0	0	Bacteria; Proteobacteria; Gammaproteobacteria; Thiotrichales; Piscirickettsiaceae; Thiomicrospira; uncultured gamma proteobacterium
New,CleanUp,ReferenceOTU26950	0	0	0	0	0	0	0	1.56839e-06	0	0.000147471	0	0	0	0	Bacteria; Proteobacteria; Epsilonproteobacteria; Nautiliales; Nautiliaceae; Nitratifractor; uncultured bacterium
New,ReferenceOTU1282	0	0	0	0	0	0	0	0.000148997	0	0	0	0	0	0	Unassigned
AF449239,1,1432	0	1.58255e-06	0	0	0	0	0.000143872	3.13678e-06	0	0	0	0	0	0	Bacteria; Proteobacteria; Epsilonproteobacteria; Campylobacterales; Campylobacteraceae; Arcobacter; uncultured epsilon proteobacterium
New,CleanUp,ReferenceOTU609097	0	0	0	0	0	1.32617e-05	0.000133313	0	1.66418e-06	0	0	0	0	0	Bacteria; Proteobacteria; Epsilonproteobacteria
New,CleanUp,ReferenceOTU135807	0	0	0	0	0	0	7.91956e-06	0	0	0.000140097	0	0	0	0	Unassigned
New,CleanUp,ReferenceOTU1080616	0	0	0	0	0	0	0	9.41033e-06	0.000138127	0	0	0	0	0	Bacteria; Proteobacteria; Epsilonproteobacteria; Campylobacterales; Helicobacteraceae; Sulfurovum
New,CleanUp,ReferenceOTU47631	0	0	0	0	0	0	6.59963e-06	0	0	0.000140097	0	0	0	0	Bacteria; Candidate division OD1; uncultured bacterium; uncultured bacterium; uncultured bacterium; uncultured bacterium; uncultured bacterium
New,CleanUp,ReferenceOTU137786	0	0	0	0	0	0.000117315	5.27971e-06	2.35258e-05	0	0	0	0	0	0	Unassigned
New,ReferenceOTU657	0	0	0	0	0	7.34492e-05	0	6.11672e-05	8.32092e-06	1.84339e-06	0	0	0	0	Bacteria; Proteobacteria; Epsilonproteobacteria; Campylobacterales; Helicobacteraceae; Sulfurovum; uncultured bacterium
JN873968,1,1469	0	0	5.56888e-06	0	0	4.28454e-05	8.18354e-05	1.41155e-05	0	0	0	0	0	0	Bacteria; Proteobacteria; Epsilonproteobacteria; Campylobacterales; Helicobacteraceae; Sulfurovum; uncultured bacterium
AY280432,1,1454	0	0	0	0	0	3.46844e-05	0.000106914	1.56839e-06	0	0	0	0	0	0	Bacteria; Proteobacteria; Epsilonproteobacteria; Campylobacterales; Campylobacteraceae; Campylobacter; uncultured epsilon proteobacterium
New,CleanUp,ReferenceOTU558594	0	0	0	0	0	0	0	0.000138018	4.99255e-06	0	0	0	0	0	Unassigned
New,CleanUp,ReferenceOTU165178	0	0	0	0	0	0	0	0.000142723	0	0	0	0	0	0	Bacteria; Proteobacteria; Gammaproteobacteria; Thiotrichales; Piscirickettsiaceae; Thiomicrospira; uncultured bacterium
New,CleanUp,ReferenceOTU620800	0	0	3.34133e-06	0	0	0.000128536	3.95978e-06	1.56839e-06	4.99255e-06	0	0	0	0	0	Bacteria; Proteobacteria; Epsilonproteobacteria; Nautiliales; Nautiliaceae; Caminibacter; uncultured bacterium
AY531577,1,1444	0	0	0	0	0	0.000103033	1.18793e-05	4.70517e-06	0	2.21206e-05	0	0	0	0	Bacteria; Chloroflexi; Anaerolineae; Anaerolineales; Anaerolineaceae; uncultured; uncultured bacterium
New,CleanUp,ReferenceOTU22163	0	0	0	0	0	1.02013e-06	0	0.000139587	0	0	0	0	0	0	Unassigned
New,CleanUp,ReferenceOTU320068	0	0	0	0	0	0.000138737	0	1.56839e-06	0	0	0	0	0	0	Bacteria; Proteobacteria; Epsilonproteobacteria; Nautiliales; Nautiliaceae; Lebetimonas; uncultured bacterium
New,CleanUp,ReferenceOTU803071	0	0	0	0	0	2.04026e-05	0	0.000119198	0	0	0	0	0	0	Bacteria; Proteobacteria; Epsilonproteobacteria; Nautiliales; Nautiliaceae
New,CleanUp,ReferenceOTU602084	0	0	0	0	0	1.12214e-05	5.4117e-05	6.74407e-05	6.65674e-06	0	0	0	0	0	Bacteria; Proteobacteria; Epsilonproteobacteria; Campylobacterales; Helicobacteraceae; Sulfurimonas; uncultured bacterium
New,CleanUp,ReferenceOTU91198	0	0	4.4551e-06	0	0	3.06038e-06	0	0.000120766	9.98511e-06	0	0	0	0	0	Bacteria; Proteobacteria; Epsilonproteobacteria; Campylobacterales; Helicobacteraceae; Sulfurovum; uncultured bacterium
New,CleanUp,ReferenceOTU485276	0	0	1.11378e-06	0	0	8.05901e-05	0	5.6462e-05	0	0	0	0	0	0	Bacteria; Proteobacteria; Epsilonproteobacteria; Nautiliales; Nautiliaceae
New,ReferenceOTU1778	0	0	5.56888e-06	0	0	0.000121395	1.31993e-06	4.70517e-06	3.32837e-06	1.84339e-06	0	0	0	0	Bacteria; Proteobacteria; Epsilonproteobacteria; Campylobacterales; Helicobacteraceae; Sulfurovum; uncultured bacterium
New,CleanUp,ReferenceOTU257302	0	0	0	0	0	0	0	3.60729e-05	0.000101515	0	0	0	0	0	Bacteria; Proteobacteria; Epsilonproteobacteria; Campylobacterales; Campylobacteraceae; Sulfurospirillum; uncultured bacterium
New,ReferenceOTU2240	0	0	0	0	0	3.06038e-06	0	0.000120766	1.33135e-05	0	0	0	0	0	Unassigned
New,CleanUp,ReferenceOTU452291	0	0	0	0	0	1.02013e-06	0	0.000128608	6.65674e-06	0	0	0	0	0	Bacteria; Proteobacteria; Epsilonproteobacteria; Campylobacterales; Campylobacteraceae; Sulfurospirillum; uncultured bacterium
New,CleanUp,ReferenceOTU521170	0	0	0	0	0	4.08051e-06	0	0.000130176	1.66418e-06	0	0	0	0	0	Bacteria; Proteobacteria; Epsilonproteobacteria; Campylobacterales; Helicobacteraceae; Sulfurimonas; uncultured bacterium
FR853069,1,1471	0	0	0	0	0	5.50869e-05	1.8479e-05	4.54833e-05	1.66418e-05	0	0	0	0	0	Bacteria; Proteobacteria; Epsilonproteobacteria; Campylobacterales; Helicobacteraceae; Sulfurovum; uncultured bacterium
New,CleanUp,ReferenceOTU117785	0	0	1.11378e-06	0	0	3.46844e-05	0	7.84194e-05	8.32092e-06	1.29037e-05	0	0	0	0	Bacteria; Proteobacteria; Epsilonproteobacteria; Nautiliales; Nautiliaceae; Caminibacter
JN873971,1,1458	0	0	0	0	0	0.000129556	3.95978e-06	0	1.66418e-06	0	0	0	0	0	Bacteria; Proteobacteria; Epsilonproteobacteria; Nautiliales; Nautiliaceae; Lebetimonas; uncultured bacterium
New,CleanUp,ReferenceOTU524771	0	0	0	0	0	0	0	0	0.000134799	0	0	0	0	0	Bacteria; Proteobacteria; Epsilonproteobacteria; Campylobacterales; Helicobacteraceae; Sulfurimonas; uncultured bacterium
AJ431223,1,1466	0	0	0	0	0	5.30467e-05	5.27971e-06	7.52827e-05	0	0	0	0	0	0	Bacteria; Proteobacteria; Epsilonproteobacteria; Campylobacterales; Helicobacteraceae; Sulfurovum; uncultured epsilon proteobacterium
New,CleanUp,ReferenceOTU546709	0	0	0	0	0	1.02013e-06	0	0.000125471	6.65674e-06	0	0	0	0	0	Bacteria; Proteobacteria; Epsilonproteobacteria; Campylobacterales; Helicobacteraceae; Sulfurovum
New,CleanUp,ReferenceOTU206472	0	0	0	0	0	0	0	3.13678e-06	0.000129806	0	0	0	0	0	Bacteria; Proteobacteria; Epsilonproteobacteria; Campylobacterales; Helicobacteraceae; Sulfurovum; uncultured epsilon proteobacterium
New,CleanUp,ReferenceOTU922520	0	0	0	0	0	0.000129556	0	1.56839e-06	1.66418e-06	0	0	0	0	0	Unassigned
New,CleanUp,ReferenceOTU228458	0	0	0	0	0	7.75297e-05	0	0	1.66418e-06	5.34582e-05	0	0	0	0	Bacteria; Proteobacteria; Epsilonproteobacteria; Nautiliales; Nautiliaceae; Caminibacter
New,CleanUp,ReferenceOTU1006602	0	0	1.11378e-06	0	0	1.63221e-05	1.31993e-06	0	4.99255e-06	0.00010876	0	0	0	0	Bacteria; Deinococcus-Thermus; Deinococci; Thermales; Thermaceae; Vulcanithermus
New,CleanUp,ReferenceOTU1080724	0	0	0	0	0	0	0	0	6.65674e-06	0.00012535	0	0	0	0	Archaea; Crenarchaeota; Thermoprotei; Desulfurococcales; Desulfurococcaceae; Staphylothermus
New,CleanUp,ReferenceOTU1467	0	0	0	0	0	0.000102013	0	2.66626e-05	3.32837e-06	0	0	0	0	0	Bacteria; Proteobacteria; Epsilonproteobacteria; Campylobacterales; Helicobacteraceae; Sulfurimonas; uncultured epsilon proteobacterium
New,CleanUp,ReferenceOTU33122	0	0	0	0	0	2.34629e-05	5.27971e-06	9.25349e-05	9.98511e-06	0	0	0	0	0	Bacteria; Proteobacteria; Deltaproteobacteria; Desulfurellales; Desulfurellaceae; uncultured; uncultured bacterium
New,CleanUp,ReferenceOTU632659	0	0	0	0	0	5.30467e-05	0	3.45046e-05	4.16046e-05	1.84339e-06	0	0	0	0	Bacteria; Aquificae; Aquificae; Aquificales; Desulfurobacteriaceae; Thermovibrio
New,CleanUp,ReferenceOTU1146932	0	0	0	0	0	0	0	6.43039e-05	6.65674e-05	0	0	0	0	0	Bacteria; Proteobacteria; Epsilonproteobacteria; Campylobacterales; Campylobacteraceae; Sulfurospirillum; uncultured bacterium
New,CleanUp,ReferenceOTU735041	0	0	2.22755e-06	0	0	0	0	0.000128608	0	0	0	0	0	0	Bacteria; Proteobacteria; Epsilonproteobacteria; Nautiliales; Nautiliaceae; Nitratifractor
New,CleanUp,ReferenceOTU1008554	0	0	3.00719e-05	0	0	4.99863e-05	3.5638e-05	0	1.49777e-05	0	0	0	0	0	Bacteria; Proteobacteria; Gammaproteobacteria; Thiotrichales; Piscirickettsiaceae; Thiomicrospira; uncultured gamma proteobacterium
New,CleanUp,ReferenceOTU920318	0	0	2.22755e-06	0	0	6.01876e-05	4.48775e-05	0	2.32986e-05	0	0	0	0	0	Bacteria; Proteobacteria; Epsilonproteobacteria; Campylobacterales; Campylobacteraceae; Campylobacter; uncultured epsilon proteobacterium
New,CleanUp,ReferenceOTU448115	0	0	1.11378e-06	1.22655e-06	0	0.000126496	0	1.56839e-06	0	0	0	0	0	0	Bacteria; Proteobacteria; Epsilonproteobacteria; Campylobacterales; Helicobacteraceae; Sulfurovum
New,CleanUp,ReferenceOTU541291	0	0	0	0	0	6.73285e-05	1.31993e-06	5.17568e-05	9.98511e-06	0	0	0	0	0	Bacteria; Thermotogae; Thermotogae; Thermotogales; Thermotogaceae; uncultured
New,CleanUp,ReferenceOTU755289	0	0	0	0	0	4.38655e-05	4.88373e-05	3.76413e-05	0	0	0	0	0	0	Bacteria; Proteobacteria; Epsilonproteobacteria; Campylobacterales; Helicobacteraceae; Sulfurimonas; uncultured bacterium
New,CleanUp,ReferenceOTU12312	0	0	0	0	0	0	0	0.000130176	0	0	0	0	0	0	Unassigned
New,CleanUp,ReferenceOTU698812	0	0	0	0	0	0	0	0.000130176	0	0	0	0	0	0	Bacteria; Proteobacteria; Deltaproteobacteria; Desulfurellales; Desulfurellaceae; Hippea
New,CleanUp,ReferenceOTU507691	0	0	1.11378e-06	0	0	2.04026e-05	1.05594e-05	9.72401e-05	0	0	0	0	0	0	Bacteria; Bacteroidetes; Flavobacteriia; Flavobacteriales; Flavobacteriaceae; Maritimimonas; uncultured bacterium
New,CleanUp,ReferenceOTU917328	0	0	2.45031e-05	0	0	5.81473e-05	4.48775e-05	1.56839e-06	0	0	0	0	0	0	Bacteria; BD1-5; uncultured bacterium; uncultured bacterium; uncultured bacterium; uncultured bacterium; uncultured bacterium
New,ReferenceOTU1216	0	0	0	0	0	5.10064e-06	0	0.000123903	0	0	0	0	0	0	Bacteria; Proteobacteria; Epsilonproteobacteria; Campylobacterales; Campylobacteraceae; Thiofractor; uncultured bacterium
New,ReferenceOTU2495	0	0	1.11378e-06	0	0	1.12214e-05	1.8479e-05	2.03891e-05	0	7.74222e-05	0	0	0	0	Bacteria; Proteobacteria; Epsilonproteobacteria; Nautiliales; Nautiliaceae; Nitratifractor; uncultured bacterium
New,CleanUp,ReferenceOTU540203	0	0	0	0	0	5.20265e-05	2.63985e-06	7.37143e-05	0	0	0	0	0	0	Bacteria; Proteobacteria; Epsilonproteobacteria; Nautiliales; Nautiliaceae; Caminibacter; uncultured bacterium
New,CleanUp,ReferenceOTU457429	0	0	0	0	0	4.38655e-05	0	6.90091e-05	1.49777e-05	0	0	0	0	0	Bacteria; Proteobacteria; Epsilonproteobacteria; Campylobacterales; Helicobacteraceae; Sulfurovum; uncultured bacterium
New,CleanUp,ReferenceOTU711361	0	0	0	0	0	0	0	9.41033e-06	0.000118157	0	0	0	0	0	Bacteria; Proteobacteria; Epsilonproteobacteria; Nautiliales; Nautiliaceae; Nitratifractor; uncultured epsilon proteobacterium
New,CleanUp,ReferenceOTU948464	0	0	0	0	0	0.000102013	1.45192e-05	1.09787e-05	0	0	0	0	0	0	Bacteria; Proteobacteria; Deltaproteobacteria; Desulfurellales; Desulfurellaceae; Hippea
New,CleanUp,ReferenceOTU131049	0	0	0	0	0	0.000124456	1.31993e-06	1.56839e-06	0	0	0	0	0	0	Bacteria; Proteobacteria; Epsilonproteobacteria; Campylobacterales; Helicobacteraceae; Sulfurovum; uncultured epsilon proteobacterium
New,CleanUp,ReferenceOTU61686	0	0	0	0	0	0	5.27971e-06	0	0	0.000121663	0	0	0	0	Archaea; Marine Hydrothermal Vent Group 1(MHVG-1); uncultured archaeon; uncultured archaeon; uncultured archaeon; uncultured archaeon; uncultured archaeon
New,CleanUp,ReferenceOTU132478	0	0	3.34133e-06	0	0	2.24428e-05	0	0.000100377	0	0	0	0	0	0	Unassigned
New,CleanUp,ReferenceOTU86179	0	0	0	0	0	2.75435e-05	0	8.62614e-05	1.16493e-05	0	0	0	0	0	Bacteria; Proteobacteria; Epsilonproteobacteria; Nautiliales; Nautiliaceae; uncultured
New,CleanUp,ReferenceOTU359003	0	0	0	0	0	9.18115e-06	0	0.000116061	0	0	0	0	0	0	Bacteria; Proteobacteria; Epsilonproteobacteria; Campylobacterales; Helicobacteraceae; Sulfurimonas; uncultured bacterium
New,CleanUp,ReferenceOTU72583	0	0	0	0	0	9.79323e-05	6.59963e-06	2.03891e-05	0	0	0	0	0	0	Bacteria; Proteobacteria; Epsilonproteobacteria; Campylobacterales; Helicobacteraceae; Sulfurovum; uncultured bacterium
New,CleanUp,ReferenceOTU490204	0	0	0	0	0	4.08051e-06	0	0.000120766	0	0	0	0	0	0	Bacteria; Bacteroidetes; Flavobacteriia; Flavobacteriales; R103-B20; uncultured bacterium; uncultured bacterium
New,ReferenceOTU2173	0	0	0	0	0	3.06038e-05	0	9.41033e-05	0	0	0	0	0	0	Bacteria; Proteobacteria; Epsilonproteobacteria; Nautiliales; Nautiliaceae
New,CleanUp,ReferenceOTU769694	0	0	1.78204e-05	0	0	8.46706e-05	0	1.88207e-05	3.32837e-06	0	0	0	0	0	Bacteria; Bacteroidetes; Sphingobacteriia; Sphingobacteriales; WCHB1-69; uncultured bacterium; uncultured bacterium
New,CleanUp,ReferenceOTU1071679	0	0	0	0	0	3.06038e-06	0	0.000117629	3.32837e-06	0	0	0	0	0	Bacteria; Proteobacteria; Epsilonproteobacteria; Campylobacterales; Campylobacteraceae; Sulfurospirillum; uncultured bacterium
New,CleanUp,ReferenceOTU195169	0	0	0	0	0	6.32479e-05	2.63985e-06	3.45046e-05	2.32986e-05	0	0	0	0	0	Bacteria; Proteobacteria; Epsilonproteobacteria; Campylobacterales; Helicobacteraceae; Sulfurovum; uncultured bacterium
New,CleanUp,ReferenceOTU245684	0	0	0	0	0	1.02013e-06	0	0.000117629	4.99255e-06	0	0	0	0	0	Bacteria; Bacteroidetes; Flavobacteriia; Flavobacteriales; R103-B20; uncultured bacterium; uncultured bacterium
New,CleanUp,ReferenceOTU844176	0	0	0	0	0	2.04026e-06	0	3.45046e-05	8.1545e-05	5.53016e-06	0	0	0	0	Bacteria; Proteobacteria; Deltaproteobacteria; Desulfurellales; Desulfurellaceae; Hippea
New,CleanUp,ReferenceOTU698212	0	0	0	0	0	7.85499e-05	0	2.50942e-05	1.99702e-05	0	0	0	0	0	Bacteria; Proteobacteria; Epsilonproteobacteria; Nautiliales; Nautiliaceae; Caminibacter; uncultured bacterium
New,CleanUp,ReferenceOTU157729	0	0	0	0	0	6.12077e-06	1.05594e-05	0	0	0.000106916	0	0	0	0	Bacteria; Acidobacteria; Holophagae; Acanthopleuribacterales; Acanthopleuribacteraceae; Thermotomaculum; uncultured bacterium
New,ReferenceOTU370	0	0	0	0	0	2.14227e-05	0.000100314	1.56839e-06	0	0	0	0	0	0	Bacteria; Proteobacteria; Epsilonproteobacteria; Campylobacterales; Helicobacteraceae; Sulfurovum; uncultured bacterium
New,CleanUp,ReferenceOTU100302	0	0	0	0	0	5.81473e-05	7.91956e-06	4.39149e-05	1.33135e-05	0	0	0	0	0	Bacteria; Proteobacteria; Epsilonproteobacteria; Campylobacterales; Helicobacteraceae; Sulfurovum; uncultured bacterium
New,CleanUp,ReferenceOTU1044156	0	0	0	0	0	2.04026e-06	2.63985e-06	2.03891e-05	9.81869e-05	0	0	0	0	0	Bacteria; Proteobacteria; Epsilonproteobacteria; Campylobacterales; Helicobacteraceae; Sulfurovum; uncultured epsilon proteobacterium
New,CleanUp,ReferenceOTU1008105	0	0	0	0	0	0	0	0.000120766	0	1.84339e-06	0	0	0	0	Bacteria; Proteobacteria; Gammaproteobacteria; Thiotrichales; Piscirickettsiaceae; Thiomicrospira
New,CleanUp,ReferenceOTU454782	0	0	0	0	0	4.28454e-05	2.63985e-06	7.68511e-05	0	0	0	0	0	0	Bacteria; Proteobacteria; Epsilonproteobacteria; Nautiliales; Nautiliaceae; Thioreductor
New,CleanUp,ReferenceOTU713297	0	0	0	0	0	0	0	0.000122334	0	0	0	0	0	0	Bacteria; Proteobacteria; Gammaproteobacteria; Thiotrichales; Piscirickettsiaceae; Thiomicrospira; uncultured bacterium
New,CleanUp,ReferenceOTU881662	0	0	0	0	0	5.10064e-06	0	0.000112924	0	3.68677e-06	0	0	0	0	Bacteria; Proteobacteria; Epsilonproteobacteria; Campylobacterales; Helicobacteraceae; Sulfurimonas
New,CleanUp,ReferenceOTU1035652	0	0	0	0	0	2.04026e-06	0	0.000119198	0	0	0	0	0	0	Bacteria; Bacteroidetes; Flavobacteriia; Flavobacteriales; R103-B20; uncultured bacterium; uncultured bacterium
New,CleanUp,ReferenceOTU857925	0	0	0	0	0	8.05901e-05	3.5638e-05	0	4.99255e-06	0	0	0	0	0	Bacteria; Proteobacteria; Alphaproteobacteria; OCS116 clade
New,CleanUp,ReferenceOTU536775	0	0	0	0	0	9.18115e-06	1.31993e-06	9.72401e-05	1.33135e-05	0	0	0	0	0	Bacteria; Proteobacteria; Epsilonproteobacteria; Nautiliales; Nautiliaceae; uncultured
New,ReferenceOTU419	0	0	0	0	0	8.56908e-05	0	3.29362e-05	1.66418e-06	0	0	0	0	0	Bacteria; Proteobacteria; Epsilonproteobacteria; Nautiliales; Nautiliaceae
New,CleanUp,ReferenceOTU793349	0	0	0	0	0	4.08051e-05	0	6.43039e-05	1.49777e-05	0	0	0	0	0	Bacteria; Proteobacteria; Epsilonproteobacteria; Nautiliales; Nautiliaceae; Caminibacter; uncultured bacterium
New,CleanUp,ReferenceOTU764962	0	0	0	0	0	0	0	0	0	0.00011982	0	0	0	0	Unassigned
New,CleanUp,ReferenceOTU1030887	0	0	0	0	0	8.16103e-06	0	0.000108219	3.32837e-06	0	0	0	0	0	Bacteria; Proteobacteria; Epsilonproteobacteria; Campylobacterales; Campylobacteraceae; Thiofractor
New,CleanUp,ReferenceOTU48398	0	0	0	0	0	8.56908e-05	3.95978e-06	2.97994e-05	0	0	0	0	0	0	Bacteria; Caldiserica; Caldisericia; Caldisericales; Caldisericaceae; Caldisericum
New,CleanUp,ReferenceOTU1133326	0	0	0	0	0	0	2.90384e-05	0	0	9.03259e-05	0	0	0	0	Bacteria; Proteobacteria; Epsilonproteobacteria; Campylobacterales; Helicobacteraceae; Sulfurovum; uncultured bacterium
New,CleanUp,ReferenceOTU46541	0	0	0	0	0	6.12077e-06	0	0.000108219	4.99255e-06	0	0	0	0	0	Bacteria; Deinococcus-Thermus; Deinococci; Thermales; Thermaceae; Oceanithermus; uncultured bacterium
New,CleanUp,ReferenceOTU510092	0	0	1.11378e-06	0	0	2.95837e-05	6.59963e-06	8.15562e-05	0	0	0	0	0	0	Bacteria; Proteobacteria; Epsilonproteobacteria; Campylobacterales; Helicobacteraceae; Sulfurovum; uncultured epsilon proteobacterium
AJ575998,1,1369	0	0	0	0	0	3.06038e-06	0	1.72523e-05	9.81869e-05	0	0	0	0	0	Bacteria; Proteobacteria; Epsilonproteobacteria; Campylobacterales; Helicobacteraceae; Sulfurimonas
New,CleanUp,ReferenceOTU326585	0	0	0	0	0	1.02013e-05	0	8.78298e-05	1.99702e-05	0	0	0	0	0	Bacteria; Proteobacteria; Epsilonproteobacteria; Nautiliales; Nautiliaceae; uncultured
New,CleanUp,ReferenceOTU184918	0	0	0	0	0	5.91674e-05	5.4117e-05	4.70517e-06	0	0	0	0	0	0	Bacteria; Bacteroidetes; Bacteroidia; Bacteroidales; Marinilabiaceae; uncultured; uncultured Bacteroidetes bacterium
New,CleanUp,ReferenceOTU912245	0	0	0	0	0	0	0	0	0	0.000117977	0	0	0	0	Bacteria; Aquificae; Aquificae; Aquificales; Desulfurobacteriaceae; Desulfurobacterium
New,CleanUp,ReferenceOTU535779	0	0	0	0	0	0	0	0.000112924	4.99255e-06	0	0	0	0	0	Unassigned
New,CleanUp,ReferenceOTU641599	0	0	0	0	0	3.06038e-06	0	9.41033e-05	1.99702e-05	0	0	0	0	0	Unassigned
New,CleanUp,ReferenceOTU922859	0	0	0	0	0	7.34492e-05	2.63985e-06	3.92097e-05	1.66418e-06	0	0	0	0	0	Bacteria; Bacteroidetes; Flavobacteriia; Flavobacteriales; R103-B20
New,ReferenceOTU2186	0	0	3.34133e-06	0	0	5.50869e-05	0	5.6462e-05	1.66418e-06	0	0	0	0	0	Bacteria; Proteobacteria; Epsilonproteobacteria; Campylobacterales; Helicobacteraceae; Sulfurimonas; uncultured bacterium
New,CleanUp,ReferenceOTU1131447	0	0	0	0	0	5.81473e-05	0	3.13678e-05	2.66269e-05	0	0	0	0	0	Bacteria; Proteobacteria; Epsilonproteobacteria; Nautiliales; Nautiliaceae; Caminibacter
New,CleanUp,ReferenceOTU777286	0	0	1.11378e-06	0	0	1.32617e-05	1.31993e-06	0.000100377	0	0	0	0	0	0	Archaea; Euryarchaeota; Halobacteria; Halobacteriales; Deep Sea Hydrothermal Vent Gp 6(DHVEG-6); unidentified archaeon; unidentified archaeon
New,CleanUp,ReferenceOTU1035275	0	0	0	0	0	0.000108134	0	7.84194e-06	0	0	0	0	0	0	Bacteria; Proteobacteria; Epsilonproteobacteria; Nautiliales; Nautiliaceae; Thioreductor
New,CleanUp,ReferenceOTU355679	0	0	0	0	0	7.1409e-06	0	0	0	0.00010876	0	0	0	0	Unassigned
AM268727,1,1392	0	0	1.11378e-05	0	0	4.38655e-05	2.63985e-05	1.41155e-05	1.66418e-06	1.84339e-05	0	0	0	0	Bacteria; Proteobacteria; Epsilonproteobacteria; Campylobacterales; Helicobacteraceae; Sulfurovum; uncultured epsilon proteobacterium
New,ReferenceOTU715	0	0	1.11378e-06	0	0	0	0	6.11672e-05	3.66121e-05	1.65905e-05	0	0	0	0	Bacteria; Caldiserica; Caldisericia; Caldisericales; Caldisericaceae; Caldisericum
New,CleanUp,ReferenceOTU734295	0	0	0	0	0	6.12077e-06	0	0	0	0.00010876	0	0	0	0	Bacteria; Planctomycetes; vadinHA49; uncultured organism; uncultured organism; uncultured organism; uncultured organism
New,CleanUp,ReferenceOTU338887	0	0	0	0	0	0.000102013	0	7.84194e-06	4.99255e-06	0	0	0	0	0	Bacteria; Proteobacteria; Epsilonproteobacteria; Campylobacterales; Helicobacteraceae; Sulfurovum; uncultured bacterium
New,CleanUp,ReferenceOTU1038234	0	0	2.22755e-06	0	0	1.22415e-05	0	0.000100377	0	0	0	0	0	0	Bacteria; Proteobacteria; Epsilonproteobacteria; Campylobacterales; Helicobacteraceae; Sulfurovum; uncultured bacterium
New,ReferenceOTU1592	0	0	1.11378e-06	0	0	1.02013e-06	1.58391e-05	0	0	9.58561e-05	0	0	0	0	Bacteria; Proteobacteria; Epsilonproteobacteria; Campylobacterales; Campylobacteraceae; Campylobacter; uncultured epsilon proteobacterium
New,CleanUp,ReferenceOTU93820	0	0	2.22755e-06	0	0	2.04026e-05	1.31993e-06	3.29362e-05	5.65823e-05	0	0	0	0	0	Bacteria; Proteobacteria; Epsilonproteobacteria; Campylobacterales; Helicobacteraceae; Sulfurovum; uncultured bacterium
New,CleanUp,ReferenceOTU818262	0	0	0	0	0	0	0	0	0	0.000112447	0	0	0	0	Unassigned
New,CleanUp,ReferenceOTU387647	0	0	0	0	0	0	0	1.25471e-05	9.98511e-05	0	0	0	0	0	Bacteria; Proteobacteria; Epsilonproteobacteria; Campylobacterales; Helicobacteraceae; Sulfurimonas
New,ReferenceOTU273	0	0	0	0	0	3.06038e-06	0	3.92097e-05	6.98957e-05	0	0	0	0	0	Bacteria; Proteobacteria; Epsilonproteobacteria; Campylobacterales; Helicobacteraceae; Sulfurovum; uncultured bacterium
New,CleanUp,ReferenceOTU302191	0	0	0	0	0	0	0	0.000111356	0	0	0	0	0	0	Bacteria; Caldiserica; Caldisericia; Caldisericales; Caldisericaceae; Caldisericum
New,ReferenceOTU441	0	0	0	0	0	3.26441e-05	0	7.37143e-05	4.99255e-06	0	0	0	0	0	Bacteria; Proteobacteria; Epsilonproteobacteria; Nautiliales; Nautiliaceae; Thioreductor
FN562872,1,1346	0	0	2.22755e-06	0	0	2.95837e-05	0	4.07781e-05	3.82762e-05	0	0	0	0	0	Bacteria; Proteobacteria; Epsilonproteobacteria; Campylobacterales; Helicobacteraceae; Sulfurovum; uncultured epsilon proteobacterium
New,ReferenceOTU1688	0	0	0	0	0	0	1.31993e-06	0	0	0.00010876	0	0	0	0	Bacteria; Spirochaetae; Spirochaetes; Spirochaetales; Spirochaetaceae; Spirochaeta; uncultured bacterium
New,CleanUp,ReferenceOTU299123	0	0	0	0	0	5.10064e-06	1.31993e-06	0.000103514	0	0	0	0	0	0	Bacteria; Acidobacteria; Holophagae; Acanthopleuribacterales; Acanthopleuribacteraceae; Thermotomaculum; uncultured bacterium
New,CleanUp,ReferenceOTU382329	0	0	0	0	0	0	0	0	0.000109836	0	0	0	0	0	Bacteria; Proteobacteria; Epsilonproteobacteria; Campylobacterales; Helicobacteraceae; Sulfurovum; uncultured bacterium
New,ReferenceOTU1524	0	0	0	0	0	0	0	0.000109787	0	0	0	0	0	0	Unassigned
New,CleanUp,ReferenceOTU680196	0	0	0	0	0	0.000104053	3.95978e-06	1.56839e-06	0	0	0	0	0	0	Bacteria; Proteobacteria; Epsilonproteobacteria; Campylobacterales; Helicobacteraceae; Sulfurovum; uncultured bacterium
New,CleanUp,ReferenceOTU524225	0	0	2.0048e-05	0	0	1.93824e-05	6.07166e-05	9.41033e-06	0	0	0	0	0	0	Unassigned
New,ReferenceOTU96	0	0	1.11378e-06	0	0	0	0	0.000108219	0	0	0	0	0	0	Bacteria; Proteobacteria; Epsilonproteobacteria; Campylobacterales; Helicobacteraceae; Sulfurimonas; uncultured bacterium
New,CleanUp,ReferenceOTU825047	0	0	2.22755e-06	0	0	6.63083e-05	0	4.07781e-05	0	0	0	0	0	0	Bacteria; Proteobacteria; Epsilonproteobacteria; Nautiliales; Nautiliaceae; Caminibacter; uncultured bacterium
DQ925878,1,1449	0	0	0	0	0	1.32617e-05	0	0	0	9.58561e-05	0	0	0	0	Bacteria; Thermotogae; Thermotogae; Thermotogales; Thermotogaceae; EM3
New,CleanUp,ReferenceOTU65902	0	0	0	0	0	3.46844e-05	0	2.03891e-05	5.15897e-05	1.84339e-06	0	0	0	0	Bacteria; Aquificae; Aquificae; Aquificales; Desulfurobacteriaceae; Thermovibrio
New,CleanUp,ReferenceOTU407088	0	0	0	0	0	0	0	0.000108219	0	0	0	0	0	0	Unassigned
AJ535664,1,1485	0	0	0	0	0	3.1624e-05	4.88373e-05	0	1.66418e-06	2.58074e-05	0	0	0	0	Bacteria; Proteobacteria; Epsilonproteobacteria; Nautiliales; Nautiliaceae; Caminibacter
New,ReferenceOTU1767	0	0	1.11378e-06	0	0	1.02013e-05	8.84351e-05	6.27356e-06	1.66418e-06	0	0	0	0	0	Bacteria; Proteobacteria; Epsilonproteobacteria; Campylobacterales; Helicobacteraceae; Sulfurovum; uncultured bacterium
JQ611088,1,1395	0	0	0	0	0	3.46844e-05	3.16782e-05	3.60729e-05	4.99255e-06	0	0	0	0	0	Bacteria; Proteobacteria; Epsilonproteobacteria; Campylobacterales; Helicobacteraceae; Sulfurovum; uncultured bacterium
New,CleanUp,ReferenceOTU666102	0	0	0	0	0	1.32617e-05	0	9.41033e-05	0	0	0	0	0	0	Bacteria; Proteobacteria; Epsilonproteobacteria; Campylobacterales; Helicobacteraceae; Sulfurovum
New,CleanUp,ReferenceOTU399916	0	0	0	0	0	4.7946e-05	1.31993e-06	5.80304e-05	0	0	0	0	0	0	Bacteria; Proteobacteria; Epsilonproteobacteria; Campylobacterales; Helicobacteraceae; Sulfurovum; uncultured epsilon proteobacterium
New,CleanUp,ReferenceOTU941872	0	0	0	0	0	0.000100993	2.63985e-06	3.13678e-06	0	0	0	0	0	0	Bacteria; Proteobacteria; Epsilonproteobacteria; Campylobacterales; Helicobacteraceae; Sulfurimonas; uncultured epsilon proteobacterium
New,CleanUp,ReferenceOTU235141	0	0	0	0	0	4.08051e-06	1.31993e-05	2.03891e-05	6.82316e-05	0	0	0	0	0	Bacteria
New,ReferenceOTU2499	0	1.58255e-06	1.11378e-06	0	0	1.12214e-05	8.31554e-05	0	0	7.37354e-06	0	0	0	0	Bacteria; Proteobacteria; Epsilonproteobacteria; Campylobacterales; Helicobacteraceae; Sulfurovum; uncultured bacterium
New,CleanUp,ReferenceOTU1076913	0	0	0	0	0	7.85499e-05	7.91956e-06	6.27356e-06	1.16493e-05	0	0	0	0	0	Bacteria; Proteobacteria; Epsilonproteobacteria; Campylobacterales; Helicobacteraceae; Sulfurimonas; uncultured epsilon proteobacterium
New,CleanUp,ReferenceOTU1095456	0	0	0	0	0	8.16103e-06	1.8479e-05	6.43039e-05	1.33135e-05	0	0	0	0	0	Bacteria; BD1-5; uncultured bacterium; uncultured bacterium; uncultured bacterium; uncultured bacterium; uncultured bacterium
New,CleanUp,ReferenceOTU696858	0	0	0	0	0	9.5892e-05	0	7.84194e-06	0	0	0	0	0	0	Bacteria; Proteobacteria; Epsilonproteobacteria; Campylobacterales; Helicobacteraceae; Sulfurovum; uncultured bacterium
New,CleanUp,ReferenceOTU176537	0	0	0	0	0	0	0	0.000103514	0	0	0	0	0	0	Unassigned
New,CleanUp,ReferenceOTU508714	0	0	0	0	0	2.04026e-05	0	5.95988e-05	2.32986e-05	0	0	0	0	0	Bacteria; Proteobacteria; Epsilonproteobacteria; Campylobacterales; Helicobacteraceae; Sulfurovum; uncultured bacterium
New,CleanUp,ReferenceOTU947013	0	0	0	0	0	0	1.31993e-06	0	0.000101515	0	0	0	0	0	Bacteria; Thermodesulfobacteria; Thermodesulfobacteria; Thermodesulfobacteriales; Thermodesulfobacteriaceae; Caldimicrobium
New,CleanUp,ReferenceOTU105630	0	0	0	0	0	2.04026e-05	0	8.15562e-05	0	0	0	0	0	0	Bacteria; Proteobacteria; Epsilonproteobacteria; Campylobacterales; Helicobacteraceae; Sulfurovum; uncultured epsilon proteobacterium
New,CleanUp,ReferenceOTU1014134	0	0	0	0	0	0	0	0.000101945	0	0	0	0	0	0	Unassigned
New,CleanUp,ReferenceOTU748316	0	0	0	0	0	5.91674e-05	0	3.13678e-06	3.82762e-05	0	0	0	0	0	Bacteria; Proteobacteria; Epsilonproteobacteria; Nautiliales; Nautiliaceae; uncultured; uncultured proteobacterium
New,CleanUp,ReferenceOTU449777	0	0	0	0	0	0	0	9.72401e-05	3.32837e-06	0	0	0	0	0	Bacteria; Proteobacteria; Epsilonproteobacteria; Campylobacterales; Campylobacteraceae; Sulfurospirillum; uncultured bacterium
New,CleanUp,ReferenceOTU139884	0	0	0	0	0	0	7.91956e-06	0	0	9.21693e-05	0	0	0	0	Unassigned
New,CleanUp,ReferenceOTU49185	0	0	0	0	0	2.04026e-06	0	8.78298e-05	9.98511e-06	0	0	0	0	0	Bacteria; Proteobacteria; Epsilonproteobacteria; Nautiliales; Nautiliaceae; Nitratifractor
AY251058,1,1480	0	0	0	0	0	3.06038e-05	0	6.90091e-05	0	0	0	0	0	0	Bacteria; Proteobacteria; Epsilonproteobacteria; Nautiliales; Nautiliaceae
New,CleanUp,ReferenceOTU666334	0	0	0	0	0	0	0	0	0	9.95428e-05	0	0	0	0	Bacteria; Proteobacteria; Epsilonproteobacteria; Nautiliales; Nautiliaceae; Nitratifractor; uncultured bacterium
New,CleanUp,ReferenceOTU564912	0	0	0	0	0	5.50869e-05	0	4.39149e-05	0	0	0	0	0	0	Bacteria; Proteobacteria; Epsilonproteobacteria; Campylobacterales; Helicobacteraceae; Sulfurovum; uncultured epsilon proteobacterium
New,CleanUp,ReferenceOTU681443	0	0	0	0	0	1.02013e-06	0	1.25471e-05	8.48734e-05	0	0	0	0	0	Bacteria; Proteobacteria; Epsilonproteobacteria; Campylobacterales; Helicobacteraceae; Sulfurimonas; uncultured bacterium
New,CleanUp,ReferenceOTU251165	0	0	0	0	0	1.02013e-06	0	9.72401e-05	0	0	0	0	0	0	Unassigned
New,CleanUp,ReferenceOTU126600	0	0	1.44791e-05	0	0	1.63221e-05	6.59963e-06	0	0	6.08317e-05	0	0	0	0	Unassigned
New,CleanUp,ReferenceOTU534206	0	0	0	0	0	6.12077e-05	5.27971e-06	3.13678e-05	0	0	0	0	0	0	Bacteria; Proteobacteria; Epsilonproteobacteria; Nautiliales; Nautiliaceae; Thioreductor
New,CleanUp,ReferenceOTU714533	0	0	0	0	0	5.10064e-06	0	9.09666e-05	1.66418e-06	0	0	0	0	0	Bacteria; Proteobacteria; Epsilonproteobacteria; Nautiliales; Nautiliaceae; Nitratifractor; uncultured bacterium
New,CleanUp,ReferenceOTU1147808	0	0	0	0	0	0	5.27971e-06	0	1.49777e-05	7.74222e-05	0	0	0	0	Archaea; Euryarchaeota; Archaeoglobi; Archaeoglobales; Archaeoglobaceae; Archaeoglobus
New,CleanUp,ReferenceOTU1105085	0	0	2.22755e-06	0	0	1.53019e-05	7.52358e-05	3.13678e-06	1.66418e-06	0	0	0	0	0	Bacteria; Proteobacteria; Epsilonproteobacteria; Campylobacterales; Campylobacteraceae; Arcobacter; uncultured epsilon proteobacterium
New,CleanUp,ReferenceOTU474238	0	0	3.34133e-06	0	0	4.08051e-06	8.84351e-05	1.56839e-06	0	0	0	0	0	0	Bacteria; Proteobacteria; Epsilonproteobacteria; Campylobacterales; Helicobacteraceae; Sulfurovum; uncultured epsilon proteobacterium
New,CleanUp,ReferenceOTU769438	0	0	0	0	0	0	0	9.72401e-05	0	0	0	0	0	0	Unassigned
New,CleanUp,ReferenceOTU180650	0	0	0	0	0	1.02013e-05	7.52358e-05	0	1.16493e-05	0	0	0	0	0	Bacteria; Proteobacteria; Epsilonproteobacteria; Campylobacterales; Hydrogenimonaceae; Hydrogenimonas
New,CleanUp,ReferenceOTU971909	0	0	0	1.22655e-06	0	7.54895e-05	1.31993e-06	1.72523e-05	1.66418e-06	0	0	0	0	0	Bacteria; Proteobacteria; Epsilonproteobacteria; Nautiliales; Nautiliaceae; Caminibacter
JN856413,1,1453	0	0	0	0	0	0	3.03583e-05	0	0	6.63619e-05	0	0	0	0	Bacteria; Aquificae; Aquificae; Aquificales; Desulfurobacteriaceae; Desulfurobacterium
New,CleanUp,ReferenceOTU1036887	0	0	0	0	0	1.02013e-06	0	9.56717e-05	0	0	0	0	0	0	Bacteria; Proteobacteria; Epsilonproteobacteria; Campylobacterales; Helicobacteraceae; Sulfurimonas
New,CleanUp,ReferenceOTU192012	0	0	0	0	0	2.55032e-05	0	6.11672e-05	9.98511e-06	0	0	0	0	0	Bacteria; Proteobacteria; Epsilonproteobacteria; Campylobacterales; Helicobacteraceae; Sulfurovum; uncultured bacterium
New,CleanUp,ReferenceOTU520887	0	0	0	0	0	2.65233e-05	2.63985e-06	6.74407e-05	0	0	0	0	0	0	Bacteria; Proteobacteria; Epsilonproteobacteria; Campylobacterales; Helicobacteraceae; Sulfurovum; uncultured bacterium
New,CleanUp,ReferenceOTU904141	0	0	0	0	0	0	0	0	9.65227e-05	0	0	0	0	0	Bacteria; Proteobacteria; Epsilonproteobacteria; Campylobacterales; Helicobacteraceae; Sulfurimonas; uncultured bacterium
New,CleanUp,ReferenceOTU1008197	0	0	0	0	0	4.99863e-05	1.18793e-05	3.29362e-05	1.66418e-06	0	0	0	0	0	Bacteria; Proteobacteria; Epsilonproteobacteria; Campylobacterales; Helicobacteraceae; Sulfurovum; uncultured bacterium
New,ReferenceOTU1273	0	0	0	0	0	4.48856e-05	3.03583e-05	1.56839e-05	4.99255e-06	0	0	0	0	0	Bacteria; Proteobacteria; Epsilonproteobacteria; Campylobacterales; Campylobacteraceae; Arcobacter
New,CleanUp,ReferenceOTU200405	0	0	0	0	0	0	3.95978e-06	2.35258e-05	6.82316e-05	0	0	0	0	0	Bacteria; Proteobacteria; Epsilonproteobacteria; Campylobacterales; Helicobacteraceae; Sulfurovum; uncultured epsilon proteobacterium
New,CleanUp,ReferenceOTU380484	0	0	0	0	0	4.08051e-06	0	3.45046e-05	5.65823e-05	0	0	0	0	0	Bacteria; Proteobacteria; Epsilonproteobacteria; Campylobacterales; Helicobacteraceae
New,ReferenceOTU1449	0	0	0	0	0	2.95837e-05	6.07166e-05	3.13678e-06	1.66418e-06	0	0	0	0	0	Bacteria; Proteobacteria; Epsilonproteobacteria; Campylobacterales; Helicobacteraceae; Sulfurovum; uncultured epsilon proteobacterium
New,CleanUp,ReferenceOTU991296	0	0	0	0	0	0	0	8.15562e-05	1.33135e-05	0	0	0	0	0	Bacteria; Proteobacteria; Epsilonproteobacteria; Campylobacterales; Helicobacteraceae; Sulfurovum
New,CleanUp,ReferenceOTU972690	0	0	0	0	0	0	0	4.70517e-06	8.98659e-05	0	0	0	0	0	Bacteria; Proteobacteria; Epsilonproteobacteria; Campylobacterales; Helicobacteraceae; Sulfurimonas; uncultured bacterium
DQ295583,1,1319	0	0	0	0	0	2.55032e-05	2.11188e-05	3.76413e-05	8.32092e-06	1.84339e-06	0	0	0	0	Bacteria; Proteobacteria; Epsilonproteobacteria; Campylobacterales; Helicobacteraceae; Sulfurovum; uncultured epsilon proteobacterium
New,ReferenceOTU376	0	0	0	0	0	0	0	0	0	9.40127e-05	0	0	0	0	Bacteria; Proteobacteria; Deltaproteobacteria; Desulfovibrionales; Desulfohalobiaceae; Desulfothermus
New,CleanUp,ReferenceOTU393973	0	0	0	0	0	9.18115e-06	0	8.31246e-05	1.66418e-06	0	0	0	0	0	Bacteria; Proteobacteria; Epsilonproteobacteria; Campylobacterales; Helicobacteraceae; Sulfurovum
New,CleanUp,ReferenceOTU1097499	0	0	0	0	0	6.22278e-05	0	2.66626e-05	4.99255e-06	0	0	0	0	0	Bacteria; Proteobacteria; Epsilonproteobacteria; Nautiliales; Nautiliaceae
New,CleanUp,ReferenceOTU775904	0	0	0	0	0	7.1409e-06	6.86362e-05	6.27356e-06	1.16493e-05	0	0	0	0	0	Bacteria; Proteobacteria; Epsilonproteobacteria; Campylobacterales; Helicobacteraceae; Sulfurovum; uncultured bacterium
New,CleanUp,ReferenceOTU713951	0	0	0	0	0	3.06038e-05	1.31993e-06	5.6462e-05	4.99255e-06	0	0	0	0	0	Bacteria; Proteobacteria; Epsilonproteobacteria; Campylobacterales; Helicobacteraceae; Sulfurovum; uncultured bacterium
New,CleanUp,ReferenceOTU178977	0	0	0	0	0	1.63221e-05	1.31993e-06	4.39149e-05	2.99553e-05	1.84339e-06	0	0	0	0	Bacteria; Proteobacteria; Epsilonproteobacteria; Campylobacterales; Helicobacteraceae; Sulfurovum
New,CleanUp,ReferenceOTU1067997	0	0	0	0	0	3.06038e-06	0	8.4693e-05	0	5.53016e-06	0	0	0	0	Unassigned
New,CleanUp,ReferenceOTU875692	0	0	0	0	0	2.04026e-06	0	9.09666e-05	0	0	0	0	0	0	Bacteria; Proteobacteria; Deltaproteobacteria; Desulfobacterales; Desulfobulbaceae; Desulfobulbus; uncultured bacterium
New,CleanUp,ReferenceOTU552143	0	0	0	0	0	0	2.63985e-06	0	0	9.03259e-05	0	0	0	0	Unassigned
New,CleanUp,ReferenceOTU210991	0	0	0	0	0	2.04026e-05	0	4.07781e-05	3.16195e-05	0	0	0	0	0	Bacteria; Proteobacteria; Epsilonproteobacteria; Campylobacterales; Helicobacteraceae; Sulfurovum; uncultured epsilon proteobacterium
New,CleanUp,ReferenceOTU874056	0	0	0	0	0	0	0	9.25349e-05	0	0	0	0	0	0	Unassigned
New,CleanUp,ReferenceOTU521629	0	0	0	0	0	0	0	9.25349e-05	0	0	0	0	0	0	Bacteria; Bacteroidetes; VC2,1 Bac22; uncultured bacterium; uncultured bacterium; uncultured bacterium; uncultured bacterium
New,CleanUp,ReferenceOTU817508	0	0	0	0	0	2.04026e-06	0	0	0	9.03259e-05	0	0	0	0	Bacteria; Aquificae; Aquificae; Aquificales; Aquificaceae
New,CleanUp,ReferenceOTU330031	0	0	0	0	0	9.07914e-05	0	1.56839e-06	0	0	0	0	0	0	Bacteria; Proteobacteria; Epsilonproteobacteria; Nautiliales; Nautiliaceae; Caminibacter; uncultured bacterium
New,CleanUp,ReferenceOTU927309	0	0	0	0	0	7.34492e-05	0	0	1.8306e-05	0	0	0	0	0	Bacteria; Proteobacteria; Epsilonproteobacteria; Nautiliales; Nautiliaceae; Caminibacter
New,CleanUp,ReferenceOTU374793	0	0	0	0	0	2.65233e-05	2.11188e-05	4.07781e-05	3.32837e-06	0	0	0	0	0	Bacteria; Proteobacteria; Epsilonproteobacteria; Campylobacterales; Helicobacteraceae; Sulfurovum
New,CleanUp,ReferenceOTU878743	0	0	0	0	0	0	0	2.66626e-05	6.49032e-05	0	0	0	0	0	Bacteria; Proteobacteria; Epsilonproteobacteria; Campylobacterales; Campylobacteraceae; Sulfurospirillum; uncultured bacterium
New,CleanUp,ReferenceOTU181478	0	0	0	0	0	0	0	0	9.15301e-05	0	0	0	0	0	Bacteria; Proteobacteria; Epsilonproteobacteria; Campylobacterales; Helicobacteraceae; Sulfurovum; uncultured Sulfurovum sp,
New,CleanUp,ReferenceOTU196569	0	0	0	0	0	0	0	0	9.15301e-05	0	0	0	0	0	Bacteria; Thermodesulfobacteria; Thermodesulfobacteria; Thermodesulfobacteriales; Thermodesulfobacteriaceae; Caldimicrobium
New,ReferenceOTU1265	0	0	0	0	0	1.02013e-06	6.99561e-05	2.03891e-05	0	0	0	0	0	0	Bacteria; Proteobacteria; Epsilonproteobacteria; Campylobacterales; Helicobacteraceae; Sulfurovum; uncultured bacterium
New,CleanUp,ReferenceOTU634598	0	0	0	0	0	1.42818e-05	0	7.68511e-05	0	0	0	0	0	0	Bacteria; Proteobacteria; Epsilonproteobacteria; Campylobacterales; Helicobacteraceae; Sulfurimonas; uncultured Sulfurimonas sp,
New,CleanUp,ReferenceOTU943392	0	0	0	1.22655e-06	0	6.73285e-05	1.58391e-05	0	6.65674e-06	0	0	0	0	0	Bacteria; Proteobacteria; Epsilonproteobacteria; Campylobacterales; Helicobacteraceae; Sulfurimonas; uncultured bacterium
New,CleanUp,ReferenceOTU924119	1.912e-05	3.63987e-05	1.44791e-05	1.83982e-05	0	1.02013e-06	0	1.56839e-06	0	0	0	0	0	0	Bacteria; Chloroflexi; SAR202 clade; uncultured bacterium; uncultured bacterium; uncultured bacterium; uncultured bacterium
New,CleanUp,ReferenceOTU845091	0	0	0	0	0	0	0	9.09666e-05	0	0	0	0	0	0	Unassigned
New,CleanUp,ReferenceOTU479302	0	0	0	0	0	2.65233e-05	0	6.43039e-05	0	0	0	0	0	0	Bacteria; Proteobacteria; Epsilonproteobacteria; Campylobacterales; Helicobacteraceae; Sulfurimonas; uncultured bacterium
New,CleanUp,ReferenceOTU1137401	0	0	2.22755e-06	0	0	7.54895e-05	0	6.27356e-06	6.65674e-06	0	0	0	0	0	Bacteria; Proteobacteria; Epsilonproteobacteria; Campylobacterales; Campylobacteraceae; Arcobacter
New,CleanUp,ReferenceOTU854181	0	0	0	0	0	2.04026e-06	3.95978e-06	4.70517e-06	7.98808e-05	0	0	0	0	0	Bacteria; Proteobacteria; Epsilonproteobacteria; Campylobacterales; Helicobacteraceae; Sulfurimonas; uncultured bacterium
FJ001807,1,1529	0	0	1.11378e-06	0	0	6.22278e-05	2.37587e-05	0	3.32837e-06	0	0	0	0	0	Bacteria; Proteobacteria; Epsilonproteobacteria; Nautiliales; Nautiliaceae; Nitratiruptor; uncultured bacterium
New,CleanUp,ReferenceOTU927025	0	0	1.22515e-05	0	0	7.65096e-05	0	0	1.66418e-06	0	0	0	0	0	Unassigned
New,CleanUp,ReferenceOTU737077	0	0	2.22755e-06	0	0	8.36505e-05	2.63985e-06	0	1.66418e-06	0	0	0	0	0	Bacteria; Proteobacteria; Epsilonproteobacteria; Nautiliales; Nautiliaceae; Caminibacter; uncultured bacterium
New,CleanUp,ReferenceOTU518374	0	0	0	0	0	1.63221e-05	0	7.21459e-05	1.66418e-06	0	0	0	0	0	Bacteria; Proteobacteria; Epsilonproteobacteria; Campylobacterales; Helicobacteraceae; Sulfurovum
New,CleanUp,ReferenceOTU21609	0	0	0	0	0	6.12077e-06	5.27971e-06	7.84194e-05	0	0	0	0	0	0	Bacteria; Proteobacteria; Epsilonproteobacteria; Campylobacterales; Helicobacteraceae; Sulfurovum; uncultured bacterium
New,CleanUp,ReferenceOTU156801	0	0	0	0	0	4.38655e-05	0	4.54833e-05	0	0	0	0	0	0	Bacteria; Proteobacteria; Epsilonproteobacteria; Campylobacterales; Helicobacteraceae; Sulfurovum; uncultured epsilon proteobacterium
JX570598,1,1370	0	0	0	0	0	2.04026e-06	2.63985e-06	0	1.66418e-06	8.29524e-05	0	0	0	0	Bacteria; Proteobacteria; Epsilonproteobacteria; Campylobacterales; Campylobacteraceae; Arcobacter; uncultured epsilon proteobacterium
New,CleanUp,ReferenceOTU1067507	0	0	0	0	0	6.12077e-06	0	8.31246e-05	0	0	0	0	0	0	Bacteria; Proteobacteria; Epsilonproteobacteria; Campylobacterales; Helicobacteraceae; Sulfurimonas; uncultured bacterium
AB006899,1,1452	0	3.16511e-06	8.13056e-05	0	0	1.02013e-06	0	0	0	3.68677e-06	0	0	0	0	Bacteria; Proteobacteria; Alphaproteobacteria; Rhodobacterales; Rhodobacteraceae; Paracoccus; uncultured bacterium
New,CleanUp,ReferenceOTU24845	0	0	0	0	0	4.48856e-05	0	4.23465e-05	1.66418e-06	0	0	0	0	0	Bacteria; Proteobacteria; Epsilonproteobacteria; Nautiliales; Nautiliaceae; Thioreductor
New,CleanUp,ReferenceOTU133871	0	0	0	0	0	1.02013e-06	0	8.78298e-05	0	0	0	0	0	0	Unassigned
New,CleanUp,ReferenceOTU334178	0	0	0	0	0	0	3.95978e-06	0	0	8.47958e-05	0	0	0	0	Unassigned
New,CleanUp,ReferenceOTU635323	0	0	0	0	0	3.06038e-05	0	5.80304e-05	0	0	0	0	0	0	Bacteria; Proteobacteria; Epsilonproteobacteria; Nautiliales; Nautiliaceae; Caminibacter; uncultured bacterium
New,CleanUp,ReferenceOTU332316	0	0	0	0	0	3.87649e-05	2.11188e-05	2.50942e-05	3.32837e-06	0	0	0	0	0	Bacteria; Proteobacteria; Epsilonproteobacteria; Campylobacterales; Helicobacteraceae; Sulfurovum; uncultured epsilon proteobacterium
AB752315,1,1446	0	0	1.44791e-05	0	0	5.71272e-05	1.31993e-05	0	3.32837e-06	0	0	0	0	0	Bacteria; Aquificae; Aquificae; Aquificales; Hydrogenothermaceae
New,CleanUp,ReferenceOTU968604	0	0	0	0	0	0	0	8.78298e-05	0	0	0	0	0	0	Unassigned
New,CleanUp,ReferenceOTU671141	0	0	0	0	0	3.46844e-05	1.31993e-06	5.17568e-05	0	0	0	0	0	0	Bacteria; Proteobacteria; Epsilonproteobacteria; Campylobacterales; Helicobacteraceae; Sulfurimonas; uncultured bacterium
New,CleanUp,ReferenceOTU124239	0	0	2.22755e-06	0	0	4.28454e-05	0	3.92097e-05	3.32837e-06	0	0	0	0	0	Bacteria; Proteobacteria; Epsilonproteobacteria; Campylobacterales; Helicobacteraceae; Sulfurovum; uncultured bacterium
New,CleanUp,ReferenceOTU541566	0	0	0	0	0	7.75297e-05	6.59963e-06	1.56839e-06	1.66418e-06	0	0	0	0	0	Bacteria; Proteobacteria; Epsilonproteobacteria; Campylobacterales; Campylobacteraceae; Arcobacter; uncultured epsilon proteobacterium
New,ReferenceOTU1285	0	0	0	0	0	0	2.63985e-06	8.4693e-05	0	0	0	0	0	0	Unassigned
AY531564,1,1352	0	0	0	0	0	6.12077e-06	0	0	0	8.1109e-05	0	0	0	0	Bacteria; Proteobacteria; Epsilonproteobacteria; Nautiliales; Nautiliaceae; Nitratifractor; uncultured bacterium
New,CleanUp,ReferenceOTU531003	0	0	0	0	0	1.42818e-05	7.1276e-05	1.56839e-06	0	0	0	0	0	0	Bacteria; Proteobacteria; Epsilonproteobacteria; Campylobacterales; Helicobacteraceae; Sulfurovum
New,CleanUp,ReferenceOTU201018	0	0	0	0	0	8.16103e-06	7.2596e-05	6.27356e-06	0	0	0	0	0	0	Bacteria; Proteobacteria; Epsilonproteobacteria; Campylobacterales; Helicobacteraceae; Sulfurovum; uncultured epsilon proteobacterium
New,CleanUp,ReferenceOTU1130972	0	0	0	0	0	9.18115e-06	2.63985e-06	5.48936e-05	1.99702e-05	0	0	0	0	0	Bacteria; Proteobacteria; Epsilonproteobacteria; Campylobacterales; Helicobacteraceae; Sulfurovum; uncultured bacterium
New,CleanUp,ReferenceOTU531119	0	0	0	0	0	1.02013e-05	3.95978e-06	0	6.49032e-05	7.37354e-06	0	0	0	0	Bacteria; Proteobacteria; Epsilonproteobacteria; Nautiliales; Nautiliaceae; Nautilia
New,CleanUp,ReferenceOTU254696	0	0	0	0	0	4.08051e-06	7.91956e-05	3.13678e-06	0	0	0	0	0	0	Bacteria; Proteobacteria; Epsilonproteobacteria; Campylobacterales; Campylobacteraceae; Arcobacter; uncultured epsilon proteobacterium
New,CleanUp,ReferenceOTU520716	0	0	0	0	0	1.63221e-05	0	0	0	7.00487e-05	0	0	0	0	Unassigned
New,CleanUp,ReferenceOTU536780	0	0	0	0	0	0	0	8.4693e-05	1.66418e-06	0	0	0	0	0	Bacteria; Proteobacteria; Epsilonproteobacteria; Campylobacterales; Campylobacteraceae; Thiofractor
New,CleanUp,ReferenceOTU457034	0	0	0	0	0	0	0	8.62614e-05	0	0	0	0	0	0	Bacteria; Proteobacteria; Deltaproteobacteria; Desulfurellales; Desulfurellaceae; Hippea
New,CleanUp,ReferenceOTU634334	0	0	0	0	0	2.44831e-05	2.63985e-06	4.07781e-05	1.8306e-05	0	0	0	0	0	Bacteria; Proteobacteria; Epsilonproteobacteria; Campylobacterales; Helicobacteraceae; Sulfurovum; uncultured epsilon proteobacterium
New,CleanUp,ReferenceOTU140621	0	0	0	0	0	1.22415e-05	0	7.37143e-05	0	0	0	0	0	0	Bacteria; Proteobacteria; Epsilonproteobacteria; Campylobacterales; Helicobacteraceae; Sulfurimonas; uncultured bacterium
New,CleanUp,ReferenceOTU17383	0	0	0	0	0	7.957e-05	0	6.27356e-06	0	0	0	0	0	0	Bacteria; Proteobacteria; Epsilonproteobacteria; Nautiliales; Nautiliaceae; Nitratifractor; uncultured bacterium
New,CleanUp,ReferenceOTU700248	0	0	0	0	0	1.02013e-06	0	7.84194e-06	7.48883e-05	1.84339e-06	0	0	0	0	Bacteria; Proteobacteria; Epsilonproteobacteria; Campylobacterales; Helicobacteraceae; Sulfurovum; uncultured bacterium
New,CleanUp,ReferenceOTU611111	0	0	1.11378e-06	0	0	2.75435e-05	0	3.13678e-06	4.82613e-05	5.53016e-06	0	0	0	0	Bacteria; Proteobacteria; Epsilonproteobacteria; Nautiliales; Nautiliaceae
New,ReferenceOTU1847	0	0	0	0	0	6.22278e-05	1.8479e-05	4.70517e-06	0	0	0	0	0	0	Bacteria; Proteobacteria; Epsilonproteobacteria; Campylobacterales; Campylobacteraceae; Arcobacter; uncultured epsilon proteobacterium
New,CleanUp,ReferenceOTU783078	0	0	0	0	0	5.10064e-06	0	7.99878e-05	0	0	0	0	0	0	Unassigned
New,CleanUp,ReferenceOTU968461	0	0	0	0	0	2.04026e-06	0	0	0	8.29524e-05	0	0	0	0	Bacteria; Proteobacteria; Epsilonproteobacteria; Nautiliales; Nautiliaceae; Caminibacter; uncultured bacterium
New,CleanUp,ReferenceOTU1060063	0	0	0	0	0	0	0	7.99878e-05	4.99255e-06	0	0	0	0	0	Unassigned
New,CleanUp,ReferenceOTU139646	0	0	0	0	0	7.85499e-05	0	6.27356e-06	0	0	0	0	0	0	Bacteria; Proteobacteria; Epsilonproteobacteria; Nautiliales; Nautiliaceae; Lebetimonas
New,CleanUp,ReferenceOTU368549	0	0	0	0	0	0	0	4.70517e-06	7.98808e-05	0	0	0	0	0	Bacteria; Proteobacteria; Epsilonproteobacteria; Campylobacterales; Helicobacteraceae; Sulfurovum; uncultured bacterium
New,CleanUp,ReferenceOTU290260	0	0	0	0	0	3.06038e-05	3.95978e-05	1.41155e-05	0	0	0	0	0	0	Bacteria; Proteobacteria; Epsilonproteobacteria; Campylobacterales; Helicobacteraceae; Sulfurimonas; uncultured bacterium
New,CleanUp,ReferenceOTU979992	0	0	0	0	0	0	0	1.56839e-05	6.82316e-05	0	0	0	0	0	Bacteria; Proteobacteria; Epsilonproteobacteria; Campylobacterales; Campylobacteraceae; Sulfurospirillum; uncultured bacterium
New,CleanUp,ReferenceOTU39971	0	0	0	0	0	7.1409e-06	2.63985e-06	6.74407e-05	6.65674e-06	0	0	0	0	0	Bacteria; Proteobacteria; Epsilonproteobacteria; Campylobacterales; Helicobacteraceae; Sulfurimonas; uncultured bacterium
New,CleanUp,ReferenceOTU324678	0	0	0	0	0	1.32617e-05	0	7.05775e-05	0	0	0	0	0	0	Bacteria; Proteobacteria; Epsilonproteobacteria; Nautiliales; Nautiliaceae; Caminibacter; uncultured bacterium
New,CleanUp,ReferenceOTU118060	1.47077e-06	0	1.11378e-06	0	0	0	7.91956e-05	0	0	1.84339e-06	0	0	0	0	Bacteria; Proteobacteria; Gammaproteobacteria; Thiotrichales; Thiotrichaceae; uncultured; uncultured bacterium
New,CleanUp,ReferenceOTU484355	0	0	1.11378e-06	0	1.08473e-06	1.73422e-05	6.20365e-05	1.56839e-06	0	0	0	0	0	0	Bacteria; BD1-5; uncultured bacterium; uncultured bacterium; uncultured bacterium; uncultured bacterium; uncultured bacterium
New,CleanUp,ReferenceOTU661107	0	0	0	0	0	0	0	8.31246e-05	0	0	0	0	0	0	Unassigned
New,CleanUp,ReferenceOTU1002510	0	0	0	0	0	0	0	8.31246e-05	0	0	0	0	0	0	Unassigned
New,CleanUp,ReferenceOTU636975	0	0	0	0	0	0	0	8.31246e-05	0	0	0	0	0	0	Unassigned
New,CleanUp,ReferenceOTU654736	0	0	0	0	0	0	1.31993e-06	0	0	8.1109e-05	0	0	0	0	Bacteria; Aquificae; Aquificae; Aquificales; Desulfurobacteriaceae; Desulfurobacterium
New,CleanUp,ReferenceOTU852106	0	0	0	0	0	0	0	3.13678e-06	0	7.92656e-05	0	0	0	0	Bacteria; Proteobacteria; Epsilonproteobacteria; Nautiliales; Nautiliaceae; Nitratifractor; uncultured bacterium
New,CleanUp,ReferenceOTU235468	0	0	0	0	0	6.42681e-05	1.58391e-05	0	0	1.84339e-06	0	0	0	0	Unassigned
New,CleanUp,ReferenceOTU583531	0	0	0	0	0	2.85636e-05	2.63985e-06	4.23465e-05	8.32092e-06	0	0	0	0	0	Bacteria; Proteobacteria; Epsilonproteobacteria; Campylobacterales; Helicobacteraceae
New,CleanUp,ReferenceOTU821608	0	0	0	0	0	2.04026e-06	0	2.8231e-05	5.15897e-05	0	0	0	0	0	Bacteria; Proteobacteria; Epsilonproteobacteria; Campylobacterales; Helicobacteraceae; Sulfurimonas; uncultured bacterium
New,ReferenceOTU554	0	0	0	0	0	7.85499e-05	0	3.13678e-06	0	0	0	0	0	0	Bacteria; Proteobacteria; Epsilonproteobacteria; Campylobacterales; Helicobacteraceae; Sulfurovum; uncultured epsilon proteobacterium
CU467449,60,1378	0	0	4.78923e-05	0	0	3.06038e-05	0	3.13678e-06	0	0	0	0	0	0	Bacteria; Proteobacteria; Alphaproteobacteria; Rhodobacterales; Rhodobacteraceae; Phaeobacter
New,CleanUp,ReferenceOTU601848	0	0	0	0	0	0	0	8.15562e-05	0	0	0	0	0	0	Unassigned
New,CleanUp,ReferenceOTU633955	0	0	0	0	0	0	0	2.50942e-05	4.65972e-05	9.21693e-06	0	0	0	0	Bacteria; Caldiserica; Caldisericia; Caldisericales; Caldisericaceae; Caldisericum
New,CleanUp,ReferenceOTU12988	0	0	0	0	0	1.42818e-05	6.33565e-05	3.13678e-06	0	0	0	0	0	0	Bacteria; Proteobacteria; Epsilonproteobacteria; Campylobacterales
New,CleanUp,ReferenceOTU73011	0	0	0	0	0	1.63221e-05	0	6.43039e-05	0	0	0	0	0	0	Unassigned
New,CleanUp,ReferenceOTU1091816	0	0	0	0	0	0	0	7.21459e-05	8.32092e-06	0	0	0	0	0	Bacteria; Proteobacteria; Epsilonproteobacteria; Campylobacterales; Campylobacteraceae; Sulfurospirillum; uncultured bacterium
EF644841,1,1326	0	0	0	0	0	6.12077e-06	1.31993e-06	1.25471e-05	3.32837e-06	5.7145e-05	0	0	0	0	Bacteria; Proteobacteria; Epsilonproteobacteria; Nautiliales; Nautiliaceae; Nitratifractor; uncultured bacterium
New,CleanUp,ReferenceOTU55484	0	0	0	0	0	6.12077e-06	0	7.37143e-05	0	0	0	0	0	0	Bacteria; Proteobacteria; Epsilonproteobacteria; Campylobacterales; Helicobacteraceae; Sulfurimonas; uncultured bacterium
New,CleanUp,ReferenceOTU412814	0	0	0	0	0	6.01876e-05	6.59963e-06	7.84194e-06	4.99255e-06	0	0	0	0	0	Bacteria; Proteobacteria; Epsilonproteobacteria; Campylobacterales; Helicobacteraceae; Sulfurovum; uncultured bacterium
New,CleanUp,ReferenceOTU468513	0	0	2.22755e-06	0	0	7.54895e-05	0	1.56839e-06	0	0	0	0	0	0	Bacteria; Proteobacteria; Epsilonproteobacteria; Campylobacterales; Helicobacteraceae; Sulfurovum; uncultured bacterium
New,CleanUp,ReferenceOTU545992	0	0	5.56888e-06	0	0	7.03888e-05	0	3.13678e-06	0	0	0	0	0	0	Bacteria; Proteobacteria; Epsilonproteobacteria; Nautiliales; Nautiliaceae; Caminibacter; uncultured bacterium
New,CleanUp,ReferenceOTU118332	0	0	0	0	0	5.6107e-05	6.59963e-06	1.56839e-06	0	1.47471e-05	0	0	0	0	Bacteria; TM6; uncultured bacterium VC2,1 Bac47; uncultured bacterium VC2,1 Bac47; uncultured bacterium VC2,1 Bac47; uncultured bacterium VC2,1 Bac47; uncultured bacterium VC2,1 Bac47
New,CleanUp,ReferenceOTU1022628	0	0	0	0	0	1.22415e-05	5.27971e-06	5.6462e-05	4.99255e-06	0	0	0	0	0	Bacteria; Proteobacteria; Epsilonproteobacteria; Campylobacterales; Helicobacteraceae; Sulfurimonas; uncultured bacterium
New,ReferenceOTU1200	0	0	5.56888e-06	0	0	6.63083e-05	3.95978e-06	3.13678e-06	0	0	0	0	0	0	Bacteria; Proteobacteria; Epsilonproteobacteria; Campylobacterales; Helicobacteraceae; Sulfurovum; uncultured bacterium
New,CleanUp,ReferenceOTU445579	0	0	0	0	0	2.04026e-06	0	7.68511e-05	0	0	0	0	0	0	Bacteria; Proteobacteria; Epsilonproteobacteria; Nautiliales; Nautiliaceae
New,CleanUp,ReferenceOTU1070948	0	0	0	0	0	6.32479e-05	3.95978e-06	0	1.16493e-05	0	0	0	0	0	Bacteria; Proteobacteria; Epsilonproteobacteria; Nautiliales; Nautiliaceae; Nitratiruptor; uncultured bacterium
New,CleanUp,ReferenceOTU101688	0	0	0	0	0	1.42818e-05	4.22376e-05	2.03891e-05	1.66418e-06	0	0	0	0	0	Bacteria; Proteobacteria; Epsilonproteobacteria; Campylobacterales; Helicobacteraceae; Sulfurimonas; uncultured bacterium
New,CleanUp,ReferenceOTU286888	0	0	0	0	0	0	0	7.84194e-05	0	0	0	0	0	0	Bacteria; Proteobacteria; Deltaproteobacteria; Desulfobacterales; Desulfobulbaceae; Desulfobulbus; uncultured bacterium
New,CleanUp,ReferenceOTU650577	0	0	0	0	0	0	0	7.84194e-05	0	0	0	0	0	0	Unassigned
New,CleanUp,ReferenceOTU153830	0	0	0	0	0	0	0	7.84194e-05	0	0	0	0	0	0	Unassigned
New,ReferenceOTU1348	0	0	0	0	0	0	1.05594e-05	0	3.32837e-06	6.45185e-05	0	0	0	0	Bacteria; Aquificae; Aquificae; Aquificales; Desulfurobacteriaceae; Desulfurobacterium
New,CleanUp,ReferenceOTU373182	0	0	0	0	0	3.57045e-05	9.23948e-06	2.8231e-05	4.99255e-06	0	0	0	0	0	Bacteria; Proteobacteria; Epsilonproteobacteria; Campylobacterales; Campylobacteraceae; Arcobacter; uncultured bacterium
New,CleanUp,ReferenceOTU627901	0	0	0	0	0	1.32617e-05	1.45192e-05	5.01884e-05	0	0	0	0	0	0	Bacteria; Proteobacteria; Epsilonproteobacteria; Campylobacterales; Helicobacteraceae; Sulfurimonas; uncultured bacterium
New,CleanUp,ReferenceOTU937899	0	0	0	0	0	4.48856e-05	0	3.29362e-05	0	0	0	0	0	0	Bacteria; Proteobacteria; Epsilonproteobacteria; Campylobacterales; Helicobacteraceae; Sulfurovum
New,CleanUp,ReferenceOTU749304	0	0	0	0	0	0	0	6.27356e-05	1.49777e-05	0	0	0	0	0	Bacteria; Proteobacteria; Epsilonproteobacteria; Campylobacterales; Campylobacteraceae; Thiofractor
New,CleanUp,ReferenceOTU65031	0	0	0	0	0	0	0	6.58723e-05	1.16493e-05	0	0	0	0	0	Unassigned
New,CleanUp,ReferenceOTU210533	0	0	0	0	0	2.24428e-05	0	5.33252e-05	1.66418e-06	0	0	0	0	0	Bacteria; Proteobacteria; Epsilonproteobacteria; Campylobacterales; Helicobacteraceae; Sulfurovum; uncultured bacterium
Y07963,1,1333	0	0	0	0	0	0	0	0	0	7.74222e-05	0	0	0	0	Archaea; Crenarchaeota; Thermoprotei; Desulfurococcales; Desulfurococcaceae; Staphylothermus
New,CleanUp,ReferenceOTU987891	0	0	0	0	0	6.63083e-05	0	1.09787e-05	0	0	0	0	0	0	Bacteria; Proteobacteria; Epsilonproteobacteria; Nautiliales; Nautiliaceae; Lebetimonas
New,CleanUp,ReferenceOTU944262	0	0	0	0	0	3.06038e-06	6.59963e-05	6.27356e-06	1.66418e-06	0	0	0	0	0	Bacteria; Proteobacteria; Epsilonproteobacteria; Campylobacterales; Helicobacteraceae; Sulfurovum; uncultured bacterium
New,CleanUp,ReferenceOTU510372	0	0	0	0	0	1.83623e-05	5.27971e-06	5.33252e-05	0	0	0	0	0	0	Bacteria; Proteobacteria; Epsilonproteobacteria; Campylobacterales; Helicobacteraceae; Sulfurovum; uncultured bacterium
New,CleanUp,ReferenceOTU146141	0	0	0	0	0	0	0	7.68511e-05	0	0	0	0	0	0	Bacteria; Proteobacteria; Deltaproteobacteria; Desulfobacterales; Desulfobulbaceae; Desulfobulbus; uncultured delta proteobacterium
New,CleanUp,ReferenceOTU85161	0	0	0	0	0	6.93687e-05	2.63985e-06	4.70517e-06	0	0	0	0	0	0	Bacteria; Lentisphaerae; R76-B128; uncultured bacterium; uncultured bacterium; uncultured bacterium; uncultured bacterium
New,CleanUp,ReferenceOTU308134	0	0	0	0	0	6.63083e-05	3.95978e-06	6.27356e-06	0	0	0	0	0	0	Bacteria; Proteobacteria; Epsilonproteobacteria; Nautiliales; Nautiliaceae; Caminibacter; uncultured bacterium
New,CleanUp,ReferenceOTU133418	0	0	0	0	0	5.10064e-06	1.31993e-06	5.33252e-05	1.66418e-05	0	0	0	0	0	Bacteria; Proteobacteria; Epsilonproteobacteria; Campylobacterales; Helicobacteraceae; Sulfurovum; uncultured bacterium
New,CleanUp,ReferenceOTU895383	0	0	0	0	0	4.08051e-06	0	7.21459e-05	0	0	0	0	0	0	Bacteria; Proteobacteria; Epsilonproteobacteria; Nautiliales; Nautiliaceae; uncultured; uncultured proteobacterium
New,CleanUp,ReferenceOTU90174	0	0	0	0	0	0	1.7159e-05	0	0	5.89883e-05	0	0	0	0	Bacteria; Proteobacteria; Epsilonproteobacteria; Campylobacterales; Helicobacteraceae; Sulfurovum; uncultured bacterium
New,ReferenceOTU504	0	0	0	0	0	5.71272e-05	7.91956e-06	1.09787e-05	0	0	0	0	0	0	Bacteria; Proteobacteria; Epsilonproteobacteria; Campylobacterales; Campylobacteraceae; Arcobacter; uncultured bacterium
New,CleanUp,ReferenceOTU499802	0	0	0	0	0	4.59058e-05	0	2.8231e-05	1.66418e-06	0	0	0	0	0	Bacteria; Proteobacteria; Epsilonproteobacteria; Campylobacterales; Helicobacteraceae; Sulfurovum
New,CleanUp,ReferenceOTU117563	0	0	0	0	0	0	0	6.74407e-05	8.32092e-06	0	0	0	0	0	Bacteria; Proteobacteria; Epsilonproteobacteria; Campylobacterales; Helicobacteraceae; Sulfurimonas; uncultured bacterium
New,CleanUp,ReferenceOTU363446	0	0	0	0	0	2.04026e-06	0	7.37143e-05	0	0	0	0	0	0	Bacteria; Acidobacteria; Holophagae; Acanthopleuribacterales; Acanthopleuribacteraceae; Thermotomaculum; uncultured bacterium
New,CleanUp,ReferenceOTU542087	0	0	0	0	0	4.59058e-05	0	1.56839e-06	1.16493e-05	1.65905e-05	0	0	0	0	Bacteria; Proteobacteria; Epsilonproteobacteria; Nautiliales; Nautiliaceae; Caminibacter; uncultured bacterium
New,CleanUp,ReferenceOTU215105	3.82399e-05	1.26604e-05	4.4551e-06	1.71717e-05	0	0	1.31993e-06	0	0	1.84339e-06	0	0	0	0	Bacteria; Proteobacteria; Gammaproteobacteria; Oceanospirillales; SUP05 cluster; uncultured bacterium; uncultured bacterium
New,CleanUp,ReferenceOTU203471	0	0	0	0	0	0	5.27971e-06	0	6.65674e-05	3.68677e-06	0	0	0	0	Bacteria; Aquificae; Aquificae; Aquificales; Desulfurobacteriaceae; Desulfurobacterium
New,CleanUp,ReferenceOTU1011502	0	0	0	0	0	0	0	7.52827e-05	0	0	0	0	0	0	Bacteria; Proteobacteria; Epsilonproteobacteria; Nautiliales; Nautiliaceae; uncultured; uncultured proteobacterium
New,CleanUp,ReferenceOTU566164	0	0	0	0	0	0	0	7.52827e-05	0	0	0	0	0	0	Unassigned
New,CleanUp,ReferenceOTU1146785	0	0	0	0	0	6.83486e-05	0	6.27356e-06	0	0	0	0	0	0	Bacteria; Proteobacteria; Epsilonproteobacteria; Nautiliales; Nautiliaceae; Thioreductor
JQ611123,1,1366	0	0	0	0	0	1.12214e-05	5.54369e-05	7.84194e-06	0	0	0	0	0	0	Bacteria; Proteobacteria; Epsilonproteobacteria; Campylobacterales; Helicobacteraceae; Sulfurovum; uncultured epsilon proteobacterium
EU574673,1,1457	0	0	0	0	0	6.12077e-06	0	2.35258e-05	1.16493e-05	3.31809e-05	0	0	0	0	Bacteria; BHI80-139
New,CleanUp,ReferenceOTU545905	0	0	0	0	0	5.81473e-05	1.45192e-05	1.56839e-06	0	0	0	0	0	0	Bacteria; Proteobacteria; Epsilonproteobacteria; Nautiliales; Nautiliaceae; Nitratifractor
New,CleanUp,ReferenceOTU449461	0	0	0	0	0	2.04026e-06	0	7.21459e-05	0	0	0	0	0	0	Unassigned
New,CleanUp,ReferenceOTU566907	0	0	0	0	0	7.1409e-06	3.5638e-05	3.13678e-05	0	0	0	0	0	0	Bacteria; Proteobacteria; Epsilonproteobacteria; Campylobacterales; Helicobacteraceae; Sulfurimonas; uncultured bacterium
New,CleanUp,ReferenceOTU484470	0	0	0	0	0	0	0	7.05775e-05	3.32837e-06	0	0	0	0	0	Unassigned
New,CleanUp,ReferenceOTU76812	0	0	0	0	0	1.12214e-05	5.93967e-05	3.13678e-06	0	0	0	0	0	0	Bacteria; Proteobacteria; Epsilonproteobacteria; Campylobacterales; Helicobacteraceae; Sulfurovum; uncultured epsilon proteobacterium
New,CleanUp,ReferenceOTU111303	0	0	0	0	0	0	0	7.37143e-05	0	0	0	0	0	0	Bacteria; Proteobacteria; Epsilonproteobacteria; Nautiliales; Nautiliaceae; Caminibacter; uncultured bacterium
New,CleanUp,ReferenceOTU948414	0	0	3.34133e-06	0	0	7.1409e-06	0	6.27356e-05	0	0	0	0	0	0	Bacteria; Bacteroidetes; Bacteroidia; Bacteroidales; Marinilabiaceae; uncultured
New,CleanUp,ReferenceOTU979531	0	0	0	0	0	0	1.31993e-06	0	0	7.18921e-05	0	0	0	0	Bacteria; Aquificae; Aquificae; Aquificales; Desulfurobacteriaceae; Desulfurobacterium
New,CleanUp,ReferenceOTU493188	0	0	0	0	0	1.02013e-05	0	6.27356e-05	0	0	0	0	0	0	Bacteria; Proteobacteria; Epsilonproteobacteria; Campylobacterales; Helicobacteraceae; Sulfurovum; uncultured epsilon proteobacterium
DQ232415,1,1256	1.32369e-05	1.4243e-05	0	4.0476e-05	0	3.06038e-06	0	0	0	1.84339e-06	0	0	0	0	Bacteria; Firmicutes; Bacilli; Bacillales; Staphylococcaceae; Staphylococcus
New,CleanUp,ReferenceOTU361152	0	0	0	0	0	0	0	9.41033e-06	6.3239e-05	0	0	0	0	0	Unassigned
New,CleanUp,ReferenceOTU436164	0	0	0	0	0	5.10064e-06	6.59963e-06	0	0	6.08317e-05	0	0	0	0	Unassigned
AB278151,1,1436	0	0	3.34133e-06	0	2.16947e-06	3.06038e-06	6.20365e-05	0	0	1.84339e-06	0	0	0	0	Bacteria; Proteobacteria; Epsilonproteobacteria; Campylobacterales; Helicobacteraceae; Sulfurovum; uncultured bacterium
New,CleanUp,ReferenceOTU478012	0	0	0	0	0	5.20265e-05	0	2.03891e-05	0	0	0	0	0	0	Bacteria; Proteobacteria; Epsilonproteobacteria; Campylobacterales; Helicobacteraceae; Sulfurimonas; uncultured bacterium
New,CleanUp,ReferenceOTU876748	0	0	0	0	0	3.26441e-05	0	3.60729e-05	0	3.68677e-06	0	0	0	0	Bacteria; Proteobacteria; Epsilonproteobacteria; Nautiliales; Nautiliaceae; Nitratifractor; uncultured bacterium
New,CleanUp,ReferenceOTU195288	0	0	0	0	0	3.46844e-05	0	3.76413e-05	0	0	0	0	0	0	Bacteria; Proteobacteria; Epsilonproteobacteria; Nautiliales; Nautiliaceae; Thioreductor
New,CleanUp,ReferenceOTU111305	0	0	2.22755e-06	0	0	1.83623e-05	0	0	0	5.16148e-05	0	0	0	0	Unassigned
New,CleanUp,ReferenceOTU662626	0	0	0	0	0	1.02013e-06	0	6.27356e-06	6.49032e-05	0	0	0	0	0	Bacteria; Proteobacteria; Epsilonproteobacteria; Campylobacterales; Helicobacteraceae; Sulfurimonas; uncultured bacterium
New,CleanUp,ReferenceOTU551966	0	0	6.68265e-06	0	2.16947e-06	1.93824e-05	4.22376e-05	0	1.66418e-06	0	0	0	0	0	Bacteria; Candidate division OD1; uncultured bacterium; uncultured bacterium; uncultured bacterium; uncultured bacterium; uncultured bacterium
FJ535280,1,1323	0	0	0	0	0	3.1624e-05	2.11188e-05	1.41155e-05	3.32837e-06	1.84339e-06	0	0	0	0	Bacteria; Proteobacteria; Epsilonproteobacteria; Campylobacterales; Helicobacteraceae; Sulfurovum; uncultured epsilon proteobacterium
New,CleanUp,ReferenceOTU633362	0	0	0	0	0	2.04026e-06	0	1.56839e-06	6.82316e-05	0	0	0	0	0	Bacteria; Proteobacteria; Epsilonproteobacteria; Campylobacterales; Helicobacteraceae; Sulfurimonas; uncultured bacterium
New,CleanUp,ReferenceOTU49301	0	0	0	0	0	1.53019e-05	0	5.6462e-05	0	0	0	0	0	0	Bacteria; Proteobacteria; Epsilonproteobacteria; Nautiliales; Nautiliaceae; Thioreductor
New,CleanUp,ReferenceOTU482628	0	0	0	0	0	0	1.45192e-05	0	0	5.7145e-05	0	0	0	0	Bacteria; Thermodesulfobacteria; Thermodesulfobacteria; Thermodesulfobacteriales; Thermodesulfobacteriaceae; Caldimicrobium
New,CleanUp,ReferenceOTU803933	0	0	0	0	0	0	1.31993e-06	0	1.49777e-05	5.53016e-05	0	0	0	0	Archaea; Euryarchaeota; Archaeoglobi; Archaeoglobales; Archaeoglobaceae; Archaeoglobus
New,CleanUp,ReferenceOTU789339	0	0	0	0	0	1.02013e-06	0	7.05775e-05	0	0	0	0	0	0	Bacteria; Bacteroidetes; Flavobacteriia; Flavobacteriales; R103-B20; uncultured bacterium; uncultured bacterium
New,CleanUp,ReferenceOTU770181	0	0	0	0	0	0	0	0	7.15599e-05	0	0	0	0	0	Bacteria; Proteobacteria; Epsilonproteobacteria; Campylobacterales; Helicobacteraceae; Sulfurovum; uncultured bacterium
New,ReferenceOTU1343	0	0	0	0	0	2.85636e-05	3.82779e-05	4.70517e-06	0	0	0	0	0	0	Bacteria; Bacteroidetes; Sphingobacteriia; Sphingobacteriales; Saprospiraceae
New,CleanUp,ReferenceOTU65595	0	1.58255e-06	0	0	0	0	1.58391e-05	4.07781e-05	0	1.29037e-05	0	0	0	0	Bacteria; Proteobacteria; Deltaproteobacteria; Desulfobacterales; Desulfobulbaceae; Desulfobulbus; uncultured bacterium
New,CleanUp,ReferenceOTU15031	0	0	0	0	0	2.85636e-05	0	3.92097e-05	3.32837e-06	0	0	0	0	0	Bacteria; Proteobacteria; Epsilonproteobacteria; Campylobacterales; Helicobacteraceae; Sulfurovum; uncultured bacterium
New,CleanUp,ReferenceOTU684270	0	0	1.11378e-06	0	0	3.36642e-05	7.91956e-06	2.8231e-05	0	0	0	0	0	0	Bacteria; Proteobacteria; Epsilonproteobacteria; Campylobacterales; Helicobacteraceae; Sulfurimonas; uncultured bacterium
New,CleanUp,ReferenceOTU332116	0	0	0	0	0	0	0	6.74407e-05	3.32837e-06	0	0	0	0	0	Unassigned
New,CleanUp,ReferenceOTU187387	0	0	0	0	0	1.32617e-05	3.95978e-06	0	0	5.34582e-05	0	0	0	0	Unassigned
New,CleanUp,ReferenceOTU51905	0	0	0	0	0	0	0	7.05775e-05	0	0	0	0	0	0	Unassigned
New,CleanUp,ReferenceOTU508062	0	0	0	0	0	0	0	7.05775e-05	0	0	0	0	0	0	Unassigned
New,CleanUp,ReferenceOTU709106	0	0	0	0	0	0	0	7.05775e-05	0	0	0	0	0	0	Unassigned
New,CleanUp,ReferenceOTU1061909	0	0	0	0	0	2.04026e-06	0	2.97994e-05	3.66121e-05	1.84339e-06	0	0	0	0	Bacteria; Proteobacteria; Deltaproteobacteria; Desulfurellales; Desulfurellaceae; Hippea
New,CleanUp,ReferenceOTU136757	0	0	0	0	0	0	0	0	0	7.00487e-05	0	0	0	0	Bacteria; Aquificae; Aquificae; Aquificales; Desulfurobacteriaceae; Desulfurobacterium
New,CleanUp,ReferenceOTU545285	0	0	0	0	0	0	0	0	0	7.00487e-05	0	0	0	0	Unassigned
New,CleanUp,ReferenceOTU263453	0	0	0	0	0	7.1409e-06	0	6.27356e-06	5.65823e-05	0	0	0	0	0	Bacteria; Proteobacteria; Epsilonproteobacteria; Nautiliales; Nautiliaceae; Thioreductor
New,CleanUp,ReferenceOTU1078026	0	0	0	0	0	4.08051e-06	0	6.58723e-05	0	0	0	0	0	0	Bacteria; Proteobacteria; Epsilonproteobacteria; Campylobacterales; Helicobacteraceae; Sulfurimonas; uncultured bacterium
JN662309,1,1384	0	0	0	0	0	1.22415e-05	1.31993e-05	3.92097e-05	3.32837e-06	1.84339e-06	0	0	0	0	Bacteria; Proteobacteria; Epsilonproteobacteria; Campylobacterales; Helicobacteraceae; Sulfurovum; uncultured epsilon proteobacterium
New,CleanUp,ReferenceOTU702733	0	0	0	0	0	6.12077e-06	1.31993e-06	4.86201e-05	9.98511e-06	3.68677e-06	0	0	0	0	Bacteria; BHI80-139
New,CleanUp,ReferenceOTU583247	0	0	0	0	0	3.06038e-06	4.61974e-05	2.03891e-05	0	0	0	0	0	0	Bacteria; Bacteroidetes; SB-1; uncultured bacterium; uncultured bacterium; uncultured bacterium; uncultured bacterium
New,CleanUp,ReferenceOTU746784	0	0	0	0	0	2.04026e-06	0	6.74407e-05	0	0	0	0	0	0	Bacteria; Proteobacteria; Epsilonproteobacteria; Campylobacterales; Helicobacteraceae; Sulfurimonas
New,CleanUp,ReferenceOTU805111	0	0	0	0	0	3.1624e-05	0	3.76413e-05	0	0	0	0	0	0	Bacteria; Proteobacteria; Epsilonproteobacteria; Campylobacterales; Helicobacteraceae; Sulfurovum; uncultured bacterium
New,CleanUp,ReferenceOTU307911	0	0	0	0	0	4.59058e-05	3.95978e-06	1.88207e-05	0	0	0	0	0	0	Bacteria; Proteobacteria; Epsilonproteobacteria; Nautiliales; Nautiliaceae; Caminibacter
New,CleanUp,ReferenceOTU367842	0	0	0	0	0	2.04026e-06	0	3.29362e-05	3.16195e-05	1.84339e-06	0	0	0	0	Unassigned
New,CleanUp,ReferenceOTU47653	0	0	0	0	0	0	0	3.29362e-05	3.16195e-05	3.68677e-06	0	0	0	0	Bacteria; Proteobacteria; Deltaproteobacteria; Desulfurellales; Desulfurellaceae; Hippea
New,CleanUp,ReferenceOTU180840	0	0	0	0	0	0	0	5.48936e-05	1.33135e-05	0	0	0	0	0	Bacteria; Proteobacteria; Gammaproteobacteria; Thiotrichales; Piscirickettsiaceae; Thiomicrospira; uncultured bacterium
New,CleanUp,ReferenceOTU364092	0	0	0	0	0	0	0	0	0	6.82053e-05	0	0	0	0	Bacteria; Proteobacteria; Epsilonproteobacteria; Nautiliales; Nautiliaceae; Nitratifractor; uncultured bacterium
Y10011,1,1488	0	0	0	0	0	0	0	0	0	6.82053e-05	0	0	0	0	Archaea; Euryarchaeota; Archaeoglobi; Archaeoglobales; Archaeoglobaceae; Archaeoglobus
New,CleanUp,ReferenceOTU146906	0	0	0	0	0	1.63221e-05	0	5.01884e-05	1.66418e-06	0	0	0	0	0	Bacteria; Proteobacteria; Epsilonproteobacteria; Campylobacterales; Helicobacteraceae; Sulfurovum
New,CleanUp,ReferenceOTU120003	0	0	2.22755e-06	0	0	3.06038e-06	0	6.11672e-05	1.66418e-06	0	0	0	0	0	Bacteria; Proteobacteria; Epsilonproteobacteria; Campylobacterales; Helicobacteraceae; Sulfurimonas; uncultured bacterium
New,CleanUp,ReferenceOTU909231	0	0	0	0	0	4.08051e-06	2.63985e-06	6.11672e-05	0	0	0	0	0	0	Bacteria; Proteobacteria; Epsilonproteobacteria; Nautiliales; Nautiliaceae; Nitratifractor; uncultured bacterium
New,CleanUp,ReferenceOTU652183	0	0	0	0	0	0	0	9.41033e-06	5.82464e-05	0	0	0	0	0	Bacteria; Proteobacteria; Epsilonproteobacteria; Campylobacterales; Helicobacteraceae; Sulfurimonas; uncultured bacterium
New,ReferenceOTU285	0	0	0	0	0	0	0	6.58723e-05	1.66418e-06	0	0	0	0	0	Unassigned
New,CleanUp,ReferenceOTU879348	0	0	0	0	0	0	0	6.74407e-05	0	0	0	0	0	0	Unassigned
New,CleanUp,ReferenceOTU1005757	0	0	0	0	0	4.59058e-05	0	4.70517e-06	1.66418e-05	0	0	0	0	0	Bacteria; Proteobacteria; Epsilonproteobacteria; Campylobacterales; Helicobacteraceae; Sulfurovum; uncultured epsilon proteobacterium
New,ReferenceOTU47	0	0	0	0	3.2542e-06	1.02013e-05	4.75174e-05	6.27356e-06	0	0	0	0	0	0	Bacteria; Proteobacteria; Epsilonproteobacteria; Campylobacterales; Helicobacteraceae; Sulfurimonas; uncultured bacterium
New,CleanUp,ReferenceOTU929255	0	0	2.22755e-06	0	0	3.1624e-05	3.16782e-05	0	1.66418e-06	0	0	0	0	0	Bacteria; Bacteroidetes; Flavobacteriia; Flavobacteriales; Cryomorphaceae; Owenweeksia; uncultured bacterium
New,CleanUp,ReferenceOTU321642	0	0	0	0	0	5.10064e-06	0	5.33252e-05	4.99255e-06	3.68677e-06	0	0	0	0	Bacteria; Deinococcus-Thermus; Deinococci; Thermales; Thermaceae; Oceanithermus; uncultured bacterium
New,CleanUp,ReferenceOTU1103523	0	0	0	0	0	4.7946e-05	0	1.88207e-05	0	0	0	0	0	0	Bacteria; Bacteroidetes; Flavobacteriia; Flavobacteriales; R103-B20; uncultured bacterium; uncultured bacterium
New,CleanUp,ReferenceOTU169625	1.47077e-06	0	0	0	0	9.18115e-06	3.5638e-05	2.03891e-05	0	0	0	0	0	0	Bacteria; Bacteroidetes; Flavobacteriia; Flavobacteriales; Flavobacteriaceae; uncultured; uncultured Bacteroidetes bacterium
New,CleanUp,ReferenceOTU31885	0	0	0	0	0	4.08051e-06	5.14771e-05	1.09787e-05	0	0	0	0	0	0	Unassigned
New,CleanUp,ReferenceOTU450918	0	0	0	0	0	5.10064e-06	4.88373e-05	1.25471e-05	0	0	0	0	0	0	Bacteria; Proteobacteria; Gammaproteobacteria; Alteromonadales; Colwelliaceae; Colwellia
JQ678255,1,951	0	0	0	0	0	2.04026e-06	0	1.09787e-05	5.15897e-05	1.84339e-06	0	0	0	0	Archaea; Euryarchaeota; Thermococci; Thermococcales; Thermococcaceae
New,CleanUp,ReferenceOTU613714	0	0	0	0	0	2.04026e-06	1.18793e-05	3.92097e-05	1.33135e-05	0	0	0	0	0	Bacteria; Proteobacteria; Epsilonproteobacteria; Nautiliales; Nautiliaceae; Nitratifractor; uncultured epsilon proteobacterium
JQ611192,1,1361	0	0	0	0	0	2.04026e-06	0	6.43039e-05	0	0	0	0	0	0	Bacteria; Deferribacteres; Deferribacteres; Deferribacterales; Deferribacterales Incertae Sedis; Caldithrix; uncultured bacterium
New,CleanUp,ReferenceOTU392569	0	0	0	0	0	5.50869e-05	7.91956e-06	3.13678e-06	0	0	0	0	0	0	Unassigned
New,CleanUp,ReferenceOTU46828	0	0	0	0	0	0	0	6.58723e-05	0	0	0	0	0	0	Bacteria; Acidobacteria; Holophagae; Acanthopleuribacterales; Acanthopleuribacteraceae; Thermotomaculum; uncultured bacterium
New,CleanUp,ReferenceOTU786884	0	0	0	0	0	0	0	6.58723e-05	0	0	0	0	0	0	Unassigned
New,CleanUp,ReferenceOTU346569	0	0	0	0	0	0	0	6.58723e-05	0	0	0	0	0	0	Bacteria; Caldiserica; Caldisericia; Caldisericales; Caldisericaceae; Caldisericum
JF738108,1,1498	0	0	0	0	0	0	0	6.58723e-05	0	0	0	0	0	0	Bacteria; Caldiserica; Caldisericia; Caldisericales; Caldisericaceae; Caldisericum; uncultured bacterium
New,ReferenceOTU711	0	0	0	0	0	3.67246e-05	2.37587e-05	4.70517e-06	0	0	0	0	0	0	Bacteria; Proteobacteria; Epsilonproteobacteria; Campylobacterales; Helicobacteraceae; Sulfurimonas
New,CleanUp,ReferenceOTU454379	0	0	3.34133e-06	0	0	6.01876e-05	0	1.56839e-06	0	0	0	0	0	0	Bacteria; Proteobacteria; Epsilonproteobacteria; Nautiliales; Nautiliaceae; Caminibacter; uncultured bacterium
New,CleanUp,ReferenceOTU152670	0	0	0	0	0	0	3.95978e-06	7.84194e-06	5.32539e-05	0	0	0	0	0	Bacteria; Proteobacteria; Epsilonproteobacteria; Campylobacterales; Helicobacteraceae; Sulfurimonas
New,CleanUp,ReferenceOTU781303	0	0	0	0	0	5.71272e-05	0	7.84194e-06	0	0	0	0	0	0	Bacteria; Proteobacteria; Epsilonproteobacteria; Nautiliales; Nautiliaceae; Caminibacter; uncultured bacterium
New,CleanUp,ReferenceOTU66544	0	0	0	0	0	2.55032e-05	0	3.92097e-05	0	0	0	0	0	0	Bacteria; Proteobacteria; Epsilonproteobacteria; Campylobacterales; Helicobacteraceae; Sulfurimonas; uncultured bacterium
New,CleanUp,ReferenceOTU89820	0	0	0	0	0	0	0	0	0	6.45185e-05	0	0	0	0	Archaea; Crenarchaeota; Thermoprotei; Thermoproteales; Thermofilaceae; Thermofilum
New,CleanUp,ReferenceOTU477471	0	0	0	0	0	0	0	0	0	6.45185e-05	0	0	0	0	Bacteria; Aquificae; Aquificae; Aquificales; Desulfurobacteriaceae; Desulfurobacterium
AF420340,1,1521	0	0	0	0	0	2.34629e-05	7.91956e-06	3.29362e-05	0	0	0	0	0	0	Bacteria; Proteobacteria; Deltaproteobacteria; Desulfobacterales; Desulfobacteraceae; uncultured
New,CleanUp,ReferenceOTU920226	0	0	0	0	0	0	5.93967e-05	4.70517e-06	0	0	0	0	0	0	Bacteria; Proteobacteria; Alphaproteobacteria; OCS116 clade
FN397812,1,1405	0	0	0	0	3.90504e-05	1.02013e-05	1.31993e-05	1.56839e-06	0	0	0	0	0	0	Bacteria; Proteobacteria; Gammaproteobacteria; Alteromonadales; Colwelliaceae; Colwellia; uncultured bacterium
New,CleanUp,ReferenceOTU257553	0	0	0	0	0	1.02013e-05	0	2.97994e-05	1.66418e-05	7.37354e-06	0	0	0	0	Bacteria; BHI80-139
New,CleanUp,ReferenceOTU707728	0	0	0	0	0	5.10064e-05	0	6.27356e-06	6.65674e-06	0	0	0	0	0	Bacteria; Proteobacteria; Epsilonproteobacteria; Nautiliales; Nautiliaceae
New,CleanUp,ReferenceOTU987610	0	0	6.68265e-06	0	0	5.40668e-05	0	3.13678e-06	0	0	0	0	0	0	Unassigned
New,CleanUp,ReferenceOTU47033	0	0	0	0	0	3.06038e-05	0	2.97994e-05	3.32837e-06	0	0	0	0	0	Bacteria; Proteobacteria; Epsilonproteobacteria; Nautiliales; Nautiliaceae; Caminibacter; uncultured bacterium
New,CleanUp,ReferenceOTU927795	0	0	3.34133e-06	0	0	2.34629e-05	2.90384e-05	7.84194e-06	0	0	0	0	0	0	Bacteria; Bacteroidetes; Sphingobacteriia; Sphingobacteriales; Saprospiraceae; uncultured; uncultured bacterium
New,CleanUp,ReferenceOTU330728	0	0	0	0	0	1.02013e-05	5.01572e-05	3.13678e-06	0	0	0	0	0	0	Bacteria; Proteobacteria; Epsilonproteobacteria; Campylobacterales; Campylobacteraceae; Arcobacter
New,CleanUp,ReferenceOTU400142	0	0	0	0	0	1.63221e-05	0	4.70517e-05	0	0	0	0	0	0	Bacteria; Proteobacteria; Epsilonproteobacteria; Campylobacterales; Helicobacteraceae; Sulfurimonas; uncultured bacterium
New,CleanUp,ReferenceOTU265330	0	0	0	0	0	2.44831e-05	2.77185e-05	1.09787e-05	0	0	0	0	0	0	Bacteria; Proteobacteria; Epsilonproteobacteria; Campylobacterales; Helicobacteraceae; Sulfurovum; uncultured bacterium
New,CleanUp,ReferenceOTU80006	0	0	0	0	0	4.89662e-05	1.31993e-06	7.84194e-06	4.99255e-06	0	0	0	0	0	Bacteria; Proteobacteria; Epsilonproteobacteria; Campylobacterales; Helicobacteraceae; Sulfurovum
New,CleanUp,ReferenceOTU26891	0	0	0	0	0	0	0	5.95988e-05	3.32837e-06	0	0	0	0	0	Bacteria; Bacteroidetes; Flavobacteriia; Flavobacteriales; R103-B20; uncultured bacterium; uncultured bacterium
AF419628,1,1456	0	0	0	0	0	2.04026e-06	0	0	0	6.08317e-05	0	0	0	0	Archaea; Euryarchaeota; Archaeoglobi; Archaeoglobales; Archaeoglobaceae; uncultured; uncultured archaeon
New,CleanUp,ReferenceOTU599264	0	0	0	0	0	7.1409e-06	0	4.23465e-05	1.33135e-05	0	0	0	0	0	Bacteria; Proteobacteria; Epsilonproteobacteria; Campylobacterales; Helicobacteraceae; Sulfurimonas
New,CleanUp,ReferenceOTU1143170	0	0	0	0	0	0	0	6.27356e-05	0	0	0	0	0	0	Bacteria; Proteobacteria; Epsilonproteobacteria; Campylobacterales; Helicobacteraceae; Sulfurimonas; uncultured bacterium
New,CleanUp,ReferenceOTU160822	0	0	0	0	0	0	0	6.27356e-05	0	0	0	0	0	0	Unassigned
New,CleanUp,ReferenceOTU607332	0	0	0	0	0	0	0	6.27356e-05	0	0	0	0	0	0	Unassigned
New,CleanUp,ReferenceOTU601051	0	0	0	0	0	3.77447e-05	2.63985e-06	2.03891e-05	1.66418e-06	0	0	0	0	0	Bacteria; Proteobacteria; Epsilonproteobacteria; Campylobacterales; Helicobacteraceae; Sulfurovum; uncultured bacterium
New,CleanUp,ReferenceOTU654477	0	0	0	0	0	2.75435e-05	3.16782e-05	3.13678e-06	0	0	0	0	0	0	Bacteria; Proteobacteria; Epsilonproteobacteria; Campylobacterales; Helicobacteraceae; Sulfurovum; uncultured bacterium
New,CleanUp,ReferenceOTU301712	0	0	0	0	0	1.42818e-05	1.31993e-06	2.50942e-05	2.16344e-05	0	0	0	0	0	Bacteria; Proteobacteria; Epsilonproteobacteria; Campylobacterales; Helicobacteraceae; Sulfurovum; uncultured bacterium
New,CleanUp,ReferenceOTU155302	0	0	0	0	0	2.04026e-06	0	5.01884e-05	9.98511e-06	0	0	0	0	0	Bacteria; Proteobacteria
New,CleanUp,ReferenceOTU81866	0	0	0	0	0	3.26441e-05	0	1.09787e-05	1.8306e-05	0	0	0	0	0	Bacteria; Proteobacteria; Epsilonproteobacteria; Nautiliales; Nautiliaceae; Caminibacter; uncultured bacterium
New,CleanUp,ReferenceOTU75172	0	0	0	0	0	5.30467e-05	3.95978e-06	1.56839e-06	3.32837e-06	0	0	0	0	0	Bacteria; Proteobacteria; Epsilonproteobacteria; Campylobacterales; Helicobacteraceae; Sulfurovum; uncultured epsilon proteobacterium
New,CleanUp,ReferenceOTU442403	0	0	1.11378e-06	0	0	1.53019e-05	4.22376e-05	1.56839e-06	1.66418e-06	0	0	0	0	0	Bacteria; Proteobacteria; Epsilonproteobacteria; Campylobacterales; Helicobacteraceae; Sulfurovum
New,CleanUp,ReferenceOTU300821	0	0	0	0	0	5.81473e-05	0	0	0	3.68677e-06	0	0	0	0	Bacteria; Aquificae; Aquificae; Aquificales; Aquificaceae
New,CleanUp,ReferenceOTU283929	0	0	0	0	0	5.71272e-05	0	4.70517e-06	0	0	0	0	0	0	Bacteria; Aquificae; Aquificae; Aquificales; Desulfurobacteriaceae; Thermovibrio
New,CleanUp,ReferenceOTU380650	0	0	0	0	0	0	2.24387e-05	3.92097e-05	0	0	0	0	0	0	Unassigned
JN874124,1,1480	0	0	0	0	0	0	0	5.33252e-05	8.32092e-06	0	0	0	0	0	Bacteria; Proteobacteria; Epsilonproteobacteria; Campylobacterales; Helicobacteraceae; Sulfurimonas; uncultured bacterium
New,CleanUp,ReferenceOTU1032563	0	0	0	0	0	2.04026e-06	0	5.95988e-05	0	0	0	0	0	0	Bacteria; Caldiserica; Caldisericia; Caldisericales; Caldisericaceae; Caldisericum
New,CleanUp,ReferenceOTU580354	0	0	0	0	0	0	0	0	6.15748e-05	0	0	0	0	0	Bacteria; Thermodesulfobacteria; Thermodesulfobacteria; Thermodesulfobacteriales; Thermodesulfobacteriaceae; Thermodesulfobacterium
New,CleanUp,ReferenceOTU515819	0	0	0	0	0	1.93824e-05	1.31993e-06	4.07781e-05	0	0	0	0	0	0	Bacteria; Proteobacteria; Epsilonproteobacteria; Campylobacterales; Helicobacteraceae; Sulfurovum; uncultured bacterium
New,ReferenceOTU1278	0	0	0	0	0	0	0	1.56839e-06	5.99106e-05	0	0	0	0	0	Bacteria; Proteobacteria; Epsilonproteobacteria; Campylobacterales; Helicobacteraceae; Sulfurimonas; uncultured bacterium
New,CleanUp,ReferenceOTU31637	0	0	0	0	0	4.99863e-05	6.59963e-06	4.70517e-06	0	0	0	0	0	0	Bacteria; Proteobacteria; Epsilonproteobacteria; Campylobacterales; Helicobacteraceae; Sulfurovum; uncultured epsilon proteobacterium
New,CleanUp,ReferenceOTU1108174	0	0	0	0	0	7.1409e-06	2.90384e-05	2.50942e-05	0	0	0	0	0	0	Bacteria; Bacteroidetes; Sphingobacteriia; Sphingobacteriales; WCHB1-69
New,CleanUp,ReferenceOTU648737	0	0	0	0	0	0	0	6.11672e-05	0	0	0	0	0	0	Bacteria; Proteobacteria; Epsilonproteobacteria; Campylobacterales; Helicobacteraceae; Sulfurovum; uncultured bacterium
New,CleanUp,ReferenceOTU393443	0	0	1.11378e-06	1.22655e-06	0	7.1409e-06	4.22376e-05	9.41033e-06	0	0	0	0	0	0	Bacteria; Proteobacteria; Epsilonproteobacteria; Campylobacterales; Helicobacteraceae; Sulfurovum; uncultured bacterium
New,CleanUp,ReferenceOTU434311	0	0	1.11378e-06	0	0	7.1409e-06	4.35576e-05	0	0	9.21693e-06	0	0	0	0	Bacteria; Proteobacteria; Deltaproteobacteria; Desulfobacterales; Desulfobulbaceae; Desulfobulbus
New,CleanUp,ReferenceOTU875553	0	0	0	0	0	6.12077e-06	5.01572e-05	4.70517e-06	0	0	0	0	0	0	Bacteria; Bacteroidetes; Flavobacteriia; Flavobacteriales; Flavobacteriaceae; uncultured; uncultured Bacteroidetes bacterium
New,CleanUp,ReferenceOTU592602	0	0	0	0	0	0	0	0	0	6.08317e-05	0	0	0	0	Bacteria; Thermodesulfobacteria; Thermodesulfobacteria; Thermodesulfobacteriales; Thermodesulfobacteriaceae; Thermodesulfatator
New,CleanUp,ReferenceOTU1012638	0	0	0	0	0	1.02013e-06	0	5.95988e-05	0	0	0	0	0	0	Bacteria; Proteobacteria; Epsilonproteobacteria; Campylobacterales; Helicobacteraceae; Sulfurimonas; uncultured bacterium
New,CleanUp,ReferenceOTU1038637	0	0	0	0	0	3.36642e-05	0	2.50942e-05	1.66418e-06	0	0	0	0	0	Bacteria; Proteobacteria; Epsilonproteobacteria; Nautiliales; Nautiliaceae; Caminibacter; uncultured bacterium
New,CleanUp,ReferenceOTU840977	0	0	2.22755e-06	0	0	1.42818e-05	4.22376e-05	1.56839e-06	0	0	0	0	0	0	Bacteria; Proteobacteria; Epsilonproteobacteria; Campylobacterales; Campylobacteraceae; Arcobacter; uncultured bacterium
New,CleanUp,ReferenceOTU1097885	0	0	0	0	0	3.9785e-05	0	2.03891e-05	0	0	0	0	0	0	Bacteria; Proteobacteria; Epsilonproteobacteria; Campylobacterales; Helicobacteraceae; Sulfurovum; uncultured bacterium
New,CleanUp,ReferenceOTU582515	0	0	0	3.67964e-06	0	4.08051e-05	0	1.56839e-05	0	0	0	0	0	0	Bacteria; Proteobacteria; Epsilonproteobacteria; Campylobacterales; Helicobacteraceae; Sulfurovum; uncultured bacterium
AJ431248,1,1498	0	0	0	0	0	5.10064e-06	0	3.13678e-05	3.32837e-06	2.02772e-05	0	0	0	0	Bacteria; BHI80-139
New,CleanUp,ReferenceOTU403079	0	0	4.4551e-06	0	0	3.87649e-05	2.63985e-06	1.41155e-05	0	0	0	0	0	0	Bacteria; Bacteroidetes; Flavobacteriia; Flavobacteriales; Flavobacteriaceae; uncultured; uncultured bacterium
New,CleanUp,ReferenceOTU372720	0	0	0	0	0	0	0	1.56839e-06	5.82464e-05	0	0	0	0	0	Archaea; Euryarchaeota; Archaeoglobi; Archaeoglobales; Archaeoglobaceae; uncultured; uncultured archaeon
New,CleanUp,ReferenceOTU501720	0	0	0	0	0	0	0	5.6462e-05	3.32837e-06	0	0	0	0	0	Bacteria; Proteobacteria; Epsilonproteobacteria; Campylobacterales; Helicobacteraceae; Sulfurovum; uncultured epsilon proteobacterium
New,CleanUp,ReferenceOTU197303	0	0	0	0	0	5.40668e-05	3.95978e-06	0	1.66418e-06	0	0	0	0	0	Bacteria; Aquificae; Aquificae; Aquificales; Desulfurobacteriaceae
New,CleanUp,ReferenceOTU932156	0	0	0	0	0	0	0	5.95988e-05	0	0	0	0	0	0	Unassigned
New,ReferenceOTU188	0	0	0	0	0	0	0	5.95988e-05	0	0	0	0	0	0	Bacteria; Proteobacteria
New,CleanUp,ReferenceOTU752025	0	0	0	0	0	0	0	5.95988e-05	0	0	0	0	0	0	Bacteria; Bacteroidetes; VC2,1 Bac22; uncultured bacterium; uncultured bacterium; uncultured bacterium; uncultured bacterium
New,CleanUp,ReferenceOTU165028	0	0	0	0	0	0	0	5.95988e-05	0	0	0	0	0	0	Unassigned
New,CleanUp,ReferenceOTU1066673	0	0	2.22755e-06	0	1.08473e-06	3.26441e-05	0	2.35258e-05	0	0	0	0	0	0	Bacteria; Bacteroidetes; Flavobacteriia; Flavobacteriales; R103-B20; uncultured bacterium; uncultured bacterium
New,CleanUp,ReferenceOTU1117805	0	0	3.34133e-06	0	0	3.06038e-06	1.31993e-06	5.17568e-05	0	0	0	0	0	0	Bacteria; Proteobacteria; Epsilonproteobacteria; Campylobacterales; Helicobacteraceae; Sulfurimonas; uncultured bacterium
New,CleanUp,ReferenceOTU817994	0	0	0	0	0	0	0	7.84194e-06	5.15897e-05	0	0	0	0	0	Bacteria; Proteobacteria; Epsilonproteobacteria; Campylobacterales; Helicobacteraceae; Sulfurimonas; uncultured bacterium
KC682585,1,1482	0	0	0	0	3.2542e-06	1.53019e-05	1.31993e-05	0	0	2.76508e-05	0	0	0	0	Bacteria; Bacteroidetes; BD2-2
New,CleanUp,ReferenceOTU660090	0	0	0	0	0	2.04026e-05	3.5638e-05	0	3.32837e-06	0	0	0	0	0	Bacteria; Proteobacteria; Epsilonproteobacteria; Campylobacterales; Helicobacteraceae; Sulfurovum; uncultured bacterium
New,CleanUp,ReferenceOTU364942	0	0	0	0	0	5.30467e-05	0	6.27356e-06	0	0	0	0	0	0	Bacteria; Proteobacteria; Epsilonproteobacteria; Nautiliales; Nautiliaceae; Caminibacter
AJ431255,1,1521	0	0	0	0	0	8.16103e-06	0	4.39149e-05	3.32837e-06	3.68677e-06	0	0	0	0	Bacteria; Firmicutes; Clostridia; Thermoanaerobacterales; Thermodesulfobiaceae; Coprothermobacter
New,CleanUp,ReferenceOTU179527	0	0	0	0	0	1.02013e-06	5.01572e-05	7.84194e-06	0	0	0	0	0	0	Bacteria; BD1-5; uncultured bacterium; uncultured bacterium; uncultured bacterium; uncultured bacterium; uncultured bacterium
New,CleanUp,ReferenceOTU686451	0	0	0	0	0	0	0	0	0	5.89883e-05	0	0	0	0	Unassigned
New,CleanUp,ReferenceOTU127067	0	0	0	0	0	0	0	0	0	5.89883e-05	0	0	0	0	Bacteria; Proteobacteria; Epsilonproteobacteria; Nautiliales; Nautiliaceae; Nitratifractor
New,CleanUp,ReferenceOTU345358	0	0	0	0	0	0	0	0	0	5.89883e-05	0	0	0	0	Bacteria; Proteobacteria; Epsilonproteobacteria; Campylobacterales; Helicobacteraceae; Sulfurovum; uncultured bacterium
New,CleanUp,ReferenceOTU714783	0	0	0	0	0	4.08051e-06	0	5.48936e-05	0	0	0	0	0	0	Unassigned
New,CleanUp,ReferenceOTU606748	0	0	0	0	0	2.24428e-05	0	2.97994e-05	6.65674e-06	0	0	0	0	0	Bacteria; Proteobacteria; Epsilonproteobacteria; Campylobacterales; Helicobacteraceae; Sulfurovum
New,CleanUp,ReferenceOTU564457	0	0	0	0	0	0	0	0	5.32539e-05	5.53016e-06	0	0	0	0	Bacteria; Aquificae; Aquificae; Aquificales; Desulfurobacteriaceae; Desulfurobacterium
New,CleanUp,ReferenceOTU912992	0	0	0	0	0	5.50869e-05	0	0	0	3.68677e-06	0	0	0	0	Bacteria; Aquificae; Aquificae; Aquificales; Aquificaceae
New,CleanUp,ReferenceOTU1054714	0	0	0	0	0	5.71272e-05	0	1.56839e-06	0	0	0	0	0	0	Bacteria; Proteobacteria; Epsilonproteobacteria; Campylobacterales; Helicobacteraceae; Sulfurovum; uncultured bacterium
New,CleanUp,ReferenceOTU122305	0	0	0	0	0	2.24428e-05	3.29982e-05	3.13678e-06	0	0	0	0	0	0	Bacteria; Proteobacteria; Epsilonproteobacteria; Campylobacterales; Helicobacteraceae; Sulfurimonas; uncultured bacterium
New,CleanUp,ReferenceOTU1006605	0	0	0	0	0	4.08051e-06	0	3.13678e-06	3.66121e-05	1.47471e-05	0	0	0	0	Bacteria; Proteobacteria; Epsilonproteobacteria; Nautiliales; Nautiliaceae; uncultured
New,CleanUp,ReferenceOTU111955	0	0	0	0	0	0	0	2.19574e-05	3.66121e-05	0	0	0	0	0	Bacteria; Proteobacteria; Epsilonproteobacteria; Campylobacterales; Campylobacteraceae; Sulfurospirillum; uncultured bacterium
FR853037,1,1525	0	0	0	0	0	3.26441e-05	3.95978e-06	2.19574e-05	0	0	0	0	0	0	Bacteria; Proteobacteria; Deltaproteobacteria; Sva0485; uncultured bacterium; uncultured bacterium; uncultured bacterium
AY531601,1,1476	0	0	6.68265e-06	0	0	6.12077e-06	2.63985e-06	7.84194e-06	0	3.50243e-05	0	0	0	0	Bacteria; Proteobacteria; Epsilonproteobacteria; Campylobacterales; Helicobacteraceae; Sulfurovum; uncultured bacterium
New,CleanUp,ReferenceOTU915217	0	0	0	0	0	2.04026e-06	1.31993e-06	5.48936e-05	0	0	0	0	0	0	Unassigned
New,CleanUp,ReferenceOTU281768	0	0	0	0	0	5.50869e-05	0	3.13678e-06	0	0	0	0	0	0	Bacteria; Proteobacteria; Epsilonproteobacteria; Nautiliales; Nautiliaceae; Nitratifractor
New,CleanUp,ReferenceOTU363529	0	0	0	0	0	0	0	5.48936e-05	3.32837e-06	0	0	0	0	0	Bacteria; Proteobacteria; Epsilonproteobacteria; Campylobacterales; Helicobacteraceae; Sulfurimonas; uncultured epsilon proteobacterium
New,CleanUp,ReferenceOTU365619	0	0	4.4551e-06	0	1.08473e-06	1.22415e-05	1.97989e-05	1.88207e-05	1.66418e-06	0	0	0	0	0	Bacteria; Proteobacteria; Epsilonproteobacteria; Campylobacterales; Helicobacteraceae; Sulfurovum; uncultured epsilon proteobacterium
New,CleanUp,ReferenceOTU274458	0	0	0	0	0	0	0	5.80304e-05	0	0	0	0	0	0	Unassigned
New,CleanUp,ReferenceOTU922062	0	0	0	0	0	0	0	5.80304e-05	0	0	0	0	0	0	Bacteria; Proteobacteria; Deltaproteobacteria; Desulfobacterales; Desulfobulbaceae; Desulfobulbus; uncultured bacterium
New,CleanUp,ReferenceOTU1117149	0	0	0	0	0	0	0	5.80304e-05	0	0	0	0	0	0	Bacteria; Bacteroidetes; Flavobacteriia; Flavobacteriales; R103-B20; uncultured Bacteroidetes bacterium; uncultured Bacteroidetes bacterium
New,CleanUp,ReferenceOTU958129	0	0	0	0	0	0	0	5.80304e-05	0	0	0	0	0	0	Bacteria; Proteobacteria; Deltaproteobacteria; Desulfurellales; Desulfurellaceae; Hippea
New,CleanUp,ReferenceOTU688937	0	0	0	0	0	3.06038e-06	1.7159e-05	3.76413e-05	0	0	0	0	0	0	Bacteria; Proteobacteria; Epsilonproteobacteria; Campylobacterales; Helicobacteraceae; Sulfurimonas; uncultured bacterium
New,CleanUp,ReferenceOTU72948	0	0	0	0	0	0	0	3.60729e-05	2.16344e-05	0	0	0	0	0	Bacteria; Proteobacteria; Epsilonproteobacteria; Nautiliales; Nautiliaceae; Caminibacter; uncultured bacterium
New,CleanUp,ReferenceOTU609197	0	0	1.11378e-06	0	0	0	0	5.6462e-05	0	0	0	0	0	0	Bacteria; Proteobacteria; Epsilonproteobacteria; Nautiliales; Nautiliaceae; Nitratifractor
New,CleanUp,ReferenceOTU64889	0	0	0	0	0	4.08051e-06	0	5.17568e-05	1.66418e-06	0	0	0	0	0	Unassigned
New,CleanUp,ReferenceOTU951726	0	0	1.11378e-06	0	0	1.73422e-05	1.18793e-05	2.19574e-05	3.32837e-06	1.84339e-06	0	0	0	0	Bacteria; BD1-5; uncultured bacterium; uncultured bacterium; uncultured bacterium; uncultured bacterium; uncultured bacterium
New,CleanUp,ReferenceOTU1140389	0	0	0	0	0	3.06038e-05	0	2.66626e-05	0	0	0	0	0	0	Bacteria; Proteobacteria; Epsilonproteobacteria; Campylobacterales; Helicobacteraceae; Sulfurovum; uncultured epsilon proteobacterium
New,CleanUp,ReferenceOTU1084896	0	0	0	0	0	0	0	0	0	5.7145e-05	0	0	0	0	Bacteria; Proteobacteria; Epsilonproteobacteria; Nautiliales; Nautiliaceae; Nitratifractor; uncultured bacterium
New,CleanUp,ReferenceOTU732708	0	0	0	0	0	0	0	0	0	5.7145e-05	0	0	0	0	Bacteria; Thermodesulfobacteria; Thermodesulfobacteria; Thermodesulfobacteriales; Thermodesulfobacteriaceae
New,CleanUp,ReferenceOTU551337	0	0	0	0	0	0	0	0	0	5.7145e-05	0	0	0	0	Unassigned
New,CleanUp,ReferenceOTU1043384	0	0	0	0	0	0	0	1.88207e-05	3.82762e-05	0	0	0	0	0	Bacteria; Proteobacteria; Epsilonproteobacteria; Campylobacterales; Campylobacteraceae; Thiofractor
New,CleanUp,ReferenceOTU453095	0	0	0	0	0	0	0	4.70517e-05	9.98511e-06	0	0	0	0	0	Unassigned
New,CleanUp,ReferenceOTU946121	0	0	0	0	0	1.02013e-05	4.35576e-05	3.13678e-06	0	0	0	0	0	0	Bacteria; BD1-5; uncultured bacterium; uncultured bacterium; uncultured bacterium; uncultured bacterium; uncultured bacterium
New,CleanUp,ReferenceOTU251379	0	0	0	0	5.53214e-05	0	0	1.56839e-06	0	0	0	0	0	0	Unassigned
New,CleanUp,ReferenceOTU54773	0	0	0	0	0	2.85636e-05	0	2.8231e-05	0	0	0	0	0	0	Bacteria; Proteobacteria; Epsilonproteobacteria; Nautiliales; Nautiliaceae; Thioreductor
New,CleanUp,ReferenceOTU798344	0	0	0	0	0	4.89662e-05	1.31993e-06	6.27356e-06	0	0	0	0	0	0	Bacteria; Proteobacteria; Epsilonproteobacteria; Nautiliales; Nautiliaceae; Caminibacter; uncultured bacterium
New,CleanUp,ReferenceOTU35980	0	0	0	0	0	0	0	5.6462e-05	0	0	0	0	0	0	Bacteria; Caldiserica; Caldisericia; Caldisericales; Caldisericaceae; Caldisericum
New,CleanUp,ReferenceOTU930365	0	0	0	0	0	0	0	5.6462e-05	0	0	0	0	0	0	Bacteria; Proteobacteria; Deltaproteobacteria; Desulfurellales; Desulfurellaceae; Hippea; uncultured delta proteobacterium
New,CleanUp,ReferenceOTU1108913	0	0	0	0	0	0	0	5.6462e-05	0	0	0	0	0	0	Unassigned
New,CleanUp,ReferenceOTU94564	0	0	0	0	0	2.65233e-05	0	2.8231e-05	1.66418e-06	0	0	0	0	0	Bacteria; Proteobacteria; Epsilonproteobacteria; Campylobacterales; Helicobacteraceae; Sulfurovum; uncultured epsilon proteobacterium
New,CleanUp,ReferenceOTU678915	0	0	0	0	0	2.65233e-05	0	2.97994e-05	0	0	0	0	0	0	Bacteria; Proteobacteria; Epsilonproteobacteria; Campylobacterales; Helicobacteraceae; Sulfurovum
New,CleanUp,ReferenceOTU261307	0	0	0	0	0	6.12077e-06	0	5.01884e-05	0	0	0	0	0	0	Bacteria; Proteobacteria; Epsilonproteobacteria; Campylobacterales; Helicobacteraceae; Sulfurovum; uncultured epsilon proteobacterium
New,CleanUp,ReferenceOTU305415	0	0	0	0	0	4.08051e-06	4.75174e-05	4.70517e-06	0	0	0	0	0	0	Bacteria; Proteobacteria
New,CleanUp,ReferenceOTU1024917	0	0	0	0	0	4.59058e-05	0	0	9.98511e-06	0	0	0	0	0	Bacteria; Proteobacteria; Epsilonproteobacteria; Nautiliales; Nautiliaceae; Caminibacter; uncultured bacterium
New,CleanUp,ReferenceOTU55014	0	0	3.34133e-06	0	0	3.87649e-05	5.27971e-06	0	8.32092e-06	0	0	0	0	0	Unassigned
New,CleanUp,ReferenceOTU29986	0	0	1.11378e-06	0	0	2.04026e-05	1.18793e-05	2.19574e-05	0	0	0	0	0	0	Bacteria; Bacteroidetes; Sphingobacteriia; Sphingobacteriales; WCHB1-69
New,CleanUp,ReferenceOTU791180	0	0	3.67546e-05	0	0	1.12214e-05	2.63985e-06	4.70517e-06	0	0	0	0	0	0	Unassigned
New,CleanUp,ReferenceOTU35256	0	0	0	0	0	1.93824e-05	1.31993e-06	7.84194e-06	2.66269e-05	0	0	0	0	0	Bacteria; Proteobacteria; Epsilonproteobacteria; Campylobacterales; Campylobacteraceae; Sulfurospirillum; uncultured bacterium
New,CleanUp,ReferenceOTU593163	0	0	0	0	0	3.26441e-05	7.91956e-06	6.27356e-06	8.32092e-06	0	0	0	0	0	Bacteria; Proteobacteria; Epsilonproteobacteria; Campylobacterales; Helicobacteraceae; Sulfurovum; uncultured bacterium
New,CleanUp,ReferenceOTU698439	0	0	0	0	0	0	0	5.48936e-05	0	0	0	0	0	0	Bacteria; Proteobacteria; Epsilonproteobacteria; BR36; uncultured bacterium; uncultured bacterium; uncultured bacterium
New,CleanUp,ReferenceOTU122251	0	0	0	0	0	0	0	5.48936e-05	0	0	0	0	0	0	Bacteria; Proteobacteria; Deltaproteobacteria; Desulfurellales; Desulfurellaceae; Hippea
New,CleanUp,ReferenceOTU889138	0	0	0	0	0	0	0	5.48936e-05	0	0	0	0	0	0	Bacteria; Proteobacteria; Deltaproteobacteria; Desulfurellales; Desulfurellaceae; Hippea; uncultured delta proteobacterium
New,ReferenceOTU41	0	0	0	0	0	4.69259e-05	0	6.27356e-06	1.66418e-06	0	0	0	0	0	Bacteria; Proteobacteria; Epsilonproteobacteria; Nautiliales; Nautiliaceae; Lebetimonas
New,CleanUp,ReferenceOTU734475	0	0	0	0	0	3.06038e-06	0	1.41155e-05	9.98511e-06	2.76508e-05	0	0	0	0	Bacteria; BHI80-139
JN874002,1,1430	0	0	3.34133e-06	0	0	3.87649e-05	0	1.09787e-05	1.66418e-06	0	0	0	0	0	Bacteria; Proteobacteria; Epsilonproteobacteria; Nautiliales; Nautiliaceae; Caminibacter
New,CleanUp,ReferenceOTU562267	0	0	0	0	0	2.34629e-05	1.7159e-05	1.41155e-05	0	0	0	0	0	0	Bacteria; Proteobacteria; Epsilonproteobacteria; Campylobacterales; Campylobacteraceae; Arcobacter
New,CleanUp,ReferenceOTU780283	0	0	0	0	0	0	0	3.13678e-06	5.15897e-05	0	0	0	0	0	Bacteria; Proteobacteria; Epsilonproteobacteria; Nautiliales; Nautiliaceae
New,CleanUp,ReferenceOTU898900	0	0	0	0	0	1.02013e-06	4.09177e-05	9.41033e-06	3.32837e-06	0	0	0	0	0	Bacteria; Bacteroidetes; Flavobacteriia; Flavobacteriales; Cryomorphaceae; Owenweeksia; uncultured bacterium
New,CleanUp,ReferenceOTU334476	0	0	0	0	0	5.30467e-05	0	1.56839e-06	0	0	0	0	0	0	Bacteria; Proteobacteria; Epsilonproteobacteria; Nautiliales; Nautiliaceae; Thioreductor
New,CleanUp,ReferenceOTU243697	0	0	0	0	0	5.30467e-05	0	1.56839e-06	0	0	0	0	0	0	Bacteria; Proteobacteria; Epsilonproteobacteria; Campylobacterales; Helicobacteraceae; Sulfurovum
New,CleanUp,ReferenceOTU770144	0	0	0	0	0	3.26441e-05	0	2.19574e-05	0	0	0	0	0	0	Bacteria; Thermodesulfobacteria; Thermodesulfobacteria; Thermodesulfobacteriales; Thermodesulfobacteriaceae; PS-B30
New,CleanUp,ReferenceOTU886163	0	0	0	0	0	0	1.31993e-06	1.56839e-06	5.15897e-05	0	0	0	0	0	Bacteria; Proteobacteria; Epsilonproteobacteria; Campylobacterales; Helicobacteraceae; Sulfurimonas; uncultured bacterium
New,CleanUp,ReferenceOTU889406	0	0	0	0	0	2.04026e-06	0	4.86201e-05	0	3.68677e-06	0	0	0	0	Bacteria; Proteobacteria; Epsilonproteobacteria; Nautiliales; Nautiliaceae; Nitratifractor; uncultured bacterium
New,CleanUp,ReferenceOTU360245	0	0	0	0	0	2.44831e-05	0	2.97994e-05	0	0	0	0	0	0	Bacteria; Proteobacteria; Epsilonproteobacteria; Campylobacterales; Helicobacteraceae; Sulfurovum; uncultured bacterium
AY531578,1,1472	0	0	0	0	0	8.16103e-06	1.31993e-05	1.56839e-06	0	3.13376e-05	0	0	0	0	Bacteria; Proteobacteria; Epsilonproteobacteria; Campylobacterales; Helicobacteraceae; Sulfurovum; uncultured bacterium
New,CleanUp,ReferenceOTU634329	0	0	6.68265e-06	0	0	3.57045e-05	3.95978e-06	7.84194e-06	0	0	0	0	0	0	Bacteria; Proteobacteria; Epsilonproteobacteria; Campylobacterales; Helicobacteraceae; Sulfurovum; uncultured epsilon proteobacterium
New,CleanUp,ReferenceOTU456860	0	2.05732e-05	7.79643e-06	2.20778e-05	0	2.04026e-06	0	0	1.66418e-06	0	0	0	0	0	Bacteria; Proteobacteria; Deltaproteobacteria; Bdellovibrionales; Bdellovibrionaceae; OM27 clade; uncultured bacterium
New,CleanUp,ReferenceOTU559968	0	0	0	0	0	4.59058e-05	6.59963e-06	1.56839e-06	0	0	0	0	0	0	Bacteria; Proteobacteria; Epsilonproteobacteria; Campylobacterales; Helicobacteraceae; Sulfurovum; uncultured bacterium
DQ071279,1,1334	0	0	2.22755e-06	0	0	9.18115e-06	2.63985e-06	3.13678e-06	0	3.68677e-05	0	0	0	0	Bacteria; Proteobacteria; Epsilonproteobacteria; Campylobacterales; Helicobacteraceae; Sulfurovum; uncultured bacterium
New,CleanUp,ReferenceOTU1111919	0	0	0	0	0	1.63221e-05	0	3.76413e-05	0	0	0	0	0	0	Bacteria; Proteobacteria; Epsilonproteobacteria; Nautiliales; Nautiliaceae; Nitratifractor; uncultured epsilon proteobacterium
New,CleanUp,ReferenceOTU38768	0	0	0	0	0	3.06038e-06	4.61974e-05	4.70517e-06	0	0	0	0	0	0	Bacteria; Proteobacteria; Epsilonproteobacteria; Campylobacterales; Helicobacteraceae; Sulfurovum; uncultured epsilon proteobacterium
New,CleanUp,ReferenceOTU595452	0	0	0	0	0	2.14227e-05	1.05594e-05	2.19574e-05	0	0	0	0	0	0	Bacteria; Proteobacteria; Epsilonproteobacteria; Campylobacterales; Helicobacteraceae; Sulfurovum; uncultured bacterium
New,CleanUp,ReferenceOTU109222	0	0	0	0	0	0	1.05594e-05	0	4.32688e-05	0	0	0	0	0	Bacteria; Aquificae; Aquificae; Aquificales; Desulfurobacteriaceae; Desulfurobacterium
FR853072,1,1474	0	0	0	0	0	4.28454e-05	0	1.09787e-05	0	0	0	0	0	0	Bacteria; Bacteroidetes; Flavobacteriia; Flavobacteriales; R103-B20; uncultured bacterium; uncultured bacterium
New,CleanUp,ReferenceOTU397497	0	0	0	0	0	2.24428e-05	0	3.13678e-05	0	0	0	0	0	0	Bacteria; Proteobacteria; Epsilonproteobacteria; Campylobacterales; Helicobacteraceae; Sulfurovum
New,CleanUp,ReferenceOTU335315	0	0	0	0	0	1.42818e-05	3.16782e-05	7.84194e-06	0	0	0	0	0	0	Bacteria; Deferribacteres; Deferribacteres; Deferribacterales; Deferribacterales Incertae Sedis; Caldithrix; uncultured bacterium
New,CleanUp,ReferenceOTU749553	0	0	0	0	0	2.04026e-06	0	5.17568e-05	0	0	0	0	0	0	Bacteria; Proteobacteria; Gammaproteobacteria; Thiotrichales; Piscirickettsiaceae; Thiomicrospira; uncultured gamma proteobacterium
JQ611142,1,1378	0	0	0	0	0	2.04026e-06	0	5.17568e-05	0	0	0	0	0	0	Bacteria; Bacteroidetes; Flavobacteriia; Flavobacteriales; R103-B20; uncultured bacterium; uncultured bacterium
New,CleanUp,ReferenceOTU682724	0	0	0	0	0	2.04026e-06	5.01572e-05	1.56839e-06	0	0	0	0	0	0	Bacteria; Bacteroidetes; Flavobacteriia; Flavobacteriales; Flavobacteriaceae; uncultured; uncultured Bacteroidetes bacterium
New,CleanUp,ReferenceOTU489816	0	0	0	0	0	3.06038e-06	0	4.39149e-05	6.65674e-06	0	0	0	0	0	Bacteria; Proteobacteria; Epsilonproteobacteria; Campylobacterales; Helicobacteraceae; Sulfurovum; uncultured epsilon proteobacterium
New,CleanUp,ReferenceOTU375762	0	0	0	0	0	8.16103e-06	4.22376e-05	3.13678e-06	0	0	0	0	0	0	Bacteria; Bacteroidetes; Sphingobacteriia; Sphingobacteriales; WCHB1-69
FM997674,1,1430	0	0	0	0	0	0	0	0	0	5.34582e-05	0	0	0	0	Bacteria; Bacteroidetes; Bacteroidia; Bacteroidales; Prevotellaceae; Alloprevotella; uncultured bacterium
New,CleanUp,ReferenceOTU493917	0	0	0	0	0	0	0	0	0	5.34582e-05	0	0	0	0	Bacteria; Proteobacteria; Epsilonproteobacteria; Nautiliales; Nautiliaceae; uncultured
New,CleanUp,ReferenceOTU1065951	0	0	0	0	0	0	0	5.17568e-05	1.66418e-06	0	0	0	0	0	Bacteria; Proteobacteria; Epsilonproteobacteria; Nautiliales; Nautiliaceae
New,CleanUp,ReferenceOTU211666	0	0	0	0	0	0	0	5.33252e-05	0	0	0	0	0	0	Bacteria; Proteobacteria; Epsilonproteobacteria; Campylobacterales
New,CleanUp,ReferenceOTU494263	0	0	0	0	0	0	0	5.33252e-05	0	0	0	0	0	0	Bacteria; Proteobacteria; Deltaproteobacteria; Desulfurellales; Desulfurellaceae; Hippea; uncultured delta proteobacterium
New,CleanUp,ReferenceOTU623937	0	0	0	0	0	0	0	5.33252e-05	0	0	0	0	0	0	Unassigned
New,CleanUp,ReferenceOTU251461	0	0	0	0	0	0	0	5.33252e-05	0	0	0	0	0	0	Bacteria
New,CleanUp,ReferenceOTU10003	0	0	0	0	0	0	0	5.33252e-05	0	0	0	0	0	0	Bacteria; Bacteroidetes; Flavobacteriia; Flavobacteriales; R103-B20; uncultured bacterium; uncultured bacterium
New,CleanUp,ReferenceOTU1039961	0	0	2.22755e-06	0	0	4.18253e-05	0	0	0	9.21693e-06	0	0	0	0	Bacteria; Aquificae; Aquificae; Aquificales; Aquificaceae
New,CleanUp,ReferenceOTU955192	0	0	0	0	0	2.34629e-05	6.59963e-06	1.56839e-05	0	7.37354e-06	0	0	0	0	Bacteria; Proteobacteria; Epsilonproteobacteria; Nautiliales; Nautiliaceae; Nitratifractor
AM749992,1,1368	0	0	0	0	0	8.16103e-06	0	0	4.4933e-05	0	0	0	0	0	Archaea; Euryarchaeota; Thermoplasmata; Thermoplasmatales; AMOS1A-4113-D04; uncultured archaeon; uncultured archaeon
New,CleanUp,ReferenceOTU589161	0	0	2.22755e-06	0	0	2.24428e-05	0	2.50942e-05	3.32837e-06	0	0	0	0	0	Bacteria; Proteobacteria; Epsilonproteobacteria; Nautiliales; Nautiliaceae; Caminibacter; uncultured bacterium
New,CleanUp,ReferenceOTU69801	0	0	0	0	0	4.28454e-05	3.95978e-06	6.27356e-06	0	0	0	0	0	0	Bacteria; Proteobacteria; Epsilonproteobacteria; Campylobacterales; Helicobacteraceae; Sulfurovum; uncultured bacterium
New,CleanUp,ReferenceOTU201133	0	0	0	0	0	3.26441e-05	0	2.03891e-05	0	0	0	0	0	0	Bacteria; Proteobacteria; Epsilonproteobacteria; Campylobacterales; Helicobacteraceae; Sulfurovum; uncultured bacterium
New,CleanUp,ReferenceOTU316117	0	0	0	0	0	2.55032e-05	2.11188e-05	6.27356e-06	0	0	0	0	0	0	Bacteria; Proteobacteria; Epsilonproteobacteria; Campylobacterales; Helicobacteraceae; Sulfurovum; uncultured epsilon proteobacterium
New,ReferenceOTU450	0	0	0	0	0	4.28454e-05	0	0	9.98511e-06	0	0	0	0	0	Bacteria; Proteobacteria; Epsilonproteobacteria; Nautiliales; Nautiliaceae; Caminibacter
New,CleanUp,ReferenceOTU541388	0	0	0	0	0	0	0	7.84194e-06	4.4933e-05	0	0	0	0	0	Bacteria; Proteobacteria; Epsilonproteobacteria; Campylobacterales; Helicobacteraceae; Sulfurimonas; uncultured bacterium
JQ769535,1,1451	0	5.06417e-05	0	0	0	0	0	0	0	1.84339e-06	0	0	0	0	Bacteria; Proteobacteria; Alphaproteobacteria; Sphingomonadales; Sphingomonadaceae; Sphingomonas; uncultured bacterium
New,CleanUp,ReferenceOTU186745	0	0	0	0	0	3.06038e-06	1.31993e-06	0	0	4.7928e-05	0	0	0	0	Bacteria; Proteobacteria; Epsilonproteobacteria; Nautiliales; Nautiliaceae; Caminibacter
New,CleanUp,ReferenceOTU114285	0	0	0	0	0	0	2.63985e-05	0	0	2.58074e-05	0	0	0	0	Archaea; Euryarchaeota; Halobacteria; Halobacteriales; Deep Sea Euryarchaeotic Group(DSEG); uncultured euryarchaeote; uncultured euryarchaeote
New,CleanUp,ReferenceOTU890577	0	0	0	0	0	0	0	0	1.16493e-05	4.05545e-05	0	0	0	0	Bacteria; Proteobacteria; Deltaproteobacteria; Desulfovibrionales; Desulfohalobiaceae; Desulfothermus
New,ReferenceOTU646	0	0	0	0	0	2.04026e-06	0	2.35258e-05	2.66269e-05	0	0	0	0	0	Bacteria; Proteobacteria; Epsilonproteobacteria; Campylobacterales; Campylobacteraceae; Thiofractor
New,CleanUp,ReferenceOTU171310	0	0	0	0	0	4.59058e-05	0	6.27356e-06	0	0	0	0	0	0	Bacteria; Proteobacteria; Epsilonproteobacteria; Nautiliales; Nautiliaceae; Caminibacter; uncultured bacterium
New,ReferenceOTU669	0	0	0	0	0	1.02013e-06	1.31993e-06	0	0	4.97714e-05	0	0	0	0	Unassigned
New,CleanUp,ReferenceOTU585856	0	0	0	0	0	1.22415e-05	2.63985e-06	1.72523e-05	1.99702e-05	0	0	0	0	0	Bacteria; Proteobacteria; Epsilonproteobacteria; Campylobacterales; Helicobacteraceae; Sulfurovum; uncultured epsilon proteobacterium
New,CleanUp,ReferenceOTU474996	0	0	0	0	0	1.12214e-05	0	4.07781e-05	0	0	0	0	0	0	Bacteria; Proteobacteria; Epsilonproteobacteria; Nautiliales; Nautiliaceae; Thioreductor
New,CleanUp,ReferenceOTU847627	0	0	7.79643e-06	0	0	1.02013e-05	5.27971e-06	2.19574e-05	6.65674e-06	0	0	0	0	0	Unassigned
New,CleanUp,ReferenceOTU285486	0	0	0	0	0	4.59058e-05	2.63985e-06	0	3.32837e-06	0	0	0	0	0	Bacteria; Proteobacteria; Epsilonproteobacteria; Campylobacterales; Helicobacteraceae; Sulfurovum; uncultured bacterium
New,CleanUp,ReferenceOTU182806	0	0	0	0	0	2.44831e-05	0	1.56839e-06	0	2.58074e-05	0	0	0	0	Bacteria; Thermotogae; Thermotogae; Thermotogales; Thermotogaceae; Thermotoga
New,CleanUp,ReferenceOTU1032539	0	0	0	0	0	4.08051e-05	0	1.09787e-05	0	0	0	0	0	0	Bacteria; Proteobacteria; Epsilonproteobacteria; Campylobacterales; Helicobacteraceae; Sulfurovum
New,CleanUp,ReferenceOTU872020	0	0	0	0	0	0	0	5.17568e-05	0	0	0	0	0	0	Unassigned
New,CleanUp,ReferenceOTU1059870	0	0	0	0	0	0	0	5.17568e-05	0	0	0	0	0	0	Unassigned
New,CleanUp,ReferenceOTU441530	0	0	0	0	0	0	0	5.17568e-05	0	0	0	0	0	0	Bacteria; Proteobacteria; Epsilonproteobacteria; Nautiliales; Nautiliaceae; Nitratifractor
New,CleanUp,ReferenceOTU807729	0	0	0	0	0	0	0	5.17568e-05	0	0	0	0	0	0	Bacteria; Bacteroidetes; VC2,1 Bac22; uncultured bacterium; uncultured bacterium; uncultured bacterium; uncultured bacterium
New,CleanUp,ReferenceOTU509663	0	0	0	0	0	0	0	0	0	5.16148e-05	0	0	0	0	Archaea; Crenarchaeota; Thermoprotei; Thermoproteales; Thermoproteaceae; Thermoproteus
New,CleanUp,ReferenceOTU762305	0	0	0	0	0	6.12077e-06	0	4.54833e-05	0	0	0	0	0	0	Bacteria; Proteobacteria; Epsilonproteobacteria; Nautiliales; Nautiliaceae; Caminibacter
New,CleanUp,ReferenceOTU126914	0	0	1.11378e-06	0	0	1.22415e-05	1.45192e-05	2.19574e-05	1.66418e-06	0	0	0	0	0	Bacteria; Proteobacteria; Epsilonproteobacteria; Campylobacterales; Helicobacteraceae; Sulfurovum
New,CleanUp,ReferenceOTU672718	0	0	0	0	0	4.69259e-05	1.31993e-06	3.13678e-06	0	0	0	0	0	0	Bacteria; Proteobacteria; Epsilonproteobacteria; Campylobacterales; Helicobacteraceae; Sulfurovum; uncultured bacterium
New,CleanUp,ReferenceOTU876314	0	0	0	0	0	3.77447e-05	3.95978e-06	9.41033e-06	0	0	0	0	0	0	Bacteria; Proteobacteria; Epsilonproteobacteria; Campylobacterales; Helicobacteraceae; Sulfurovum; uncultured bacterium
New,ReferenceOTU2116	0	0	0	0	0	3.06038e-05	0	1.88207e-05	1.66418e-06	0	0	0	0	0	Bacteria; Proteobacteria; Epsilonproteobacteria; Nautiliales; Nautiliaceae; Thioreductor
New,CleanUp,ReferenceOTU303851	0	0	0	0	0	2.04026e-06	0	4.70517e-05	1.66418e-06	0	0	0	0	0	Bacteria; Proteobacteria; Epsilonproteobacteria; Nautiliales; Nautiliaceae; Thioreductor
New,CleanUp,ReferenceOTU96041	0	0	0	0	0	3.06038e-06	0	9.41033e-06	3.82762e-05	0	0	0	0	0	Bacteria; Proteobacteria; Epsilonproteobacteria; Nautiliales; Nautiliaceae; Caminibacter
New,CleanUp,ReferenceOTU217	0	0	0	0	0	2.24428e-05	0	2.8231e-05	0	0	0	0	0	0	Bacteria; Proteobacteria; Epsilonproteobacteria; Campylobacterales; Helicobacteraceae; Sulfurovum; uncultured epsilon proteobacterium
New,CleanUp,ReferenceOTU1101496	0	0	0	0	0	2.04026e-06	0	2.19574e-05	2.66269e-05	0	0	0	0	0	Bacteria; Proteobacteria; Epsilonproteobacteria; Nautiliales; Nautiliaceae; uncultured
New,ReferenceOTU458	0	0	0	0	0	4.89662e-05	0	1.56839e-06	0	0	0	0	0	0	Bacteria; Proteobacteria; Epsilonproteobacteria; Campylobacterales; Helicobacteraceae; Sulfurovum; uncultured epsilon proteobacterium
New,CleanUp,ReferenceOTU251180	0	0	0	0	0	8.16103e-06	0	4.23465e-05	0	0	0	0	0	0	Bacteria; Proteobacteria; Epsilonproteobacteria; Campylobacterales; Helicobacteraceae; Sulfurovum; uncultured bacterium
New,CleanUp,ReferenceOTU124804	0	0	0	0	0	8.16103e-06	0	4.23465e-05	0	0	0	0	0	0	Bacteria; Proteobacteria; Epsilonproteobacteria; Nautiliales; Nautiliaceae; Nitratifractor; uncultured bacterium
New,CleanUp,ReferenceOTU802378	0	0	0	0	0	0	0	4.70517e-05	3.32837e-06	0	0	0	0	0	Bacteria; Bacteroidetes; Flavobacteriia; Flavobacteriales; R103-B20; uncultured bacterium; uncultured bacterium
New,CleanUp,ReferenceOTU404000	0	0	0	0	0	3.46844e-05	0	1.56839e-05	0	0	0	0	0	0	Bacteria; Proteobacteria; Epsilonproteobacteria; Campylobacterales; Helicobacteraceae; Sulfurovum; uncultured epsilon proteobacterium
New,CleanUp,ReferenceOTU45514	1.47077e-06	0	1.11378e-06	0	0	2.04026e-06	4.09177e-05	4.70517e-06	0	0	0	0	0	0	Bacteria; Proteobacteria; Epsilonproteobacteria; Campylobacterales; Helicobacteraceae; Sulfurovum; uncultured bacterium
New,CleanUp,ReferenceOTU5572	0	0	0	0	0	0	0	5.01884e-05	0	0	0	0	0	0	Bacteria; Bacteroidetes; VC2,1 Bac22; uncultured bacterium; uncultured bacterium; uncultured bacterium; uncultured bacterium
New,CleanUp,ReferenceOTU251441	0	0	0	0	0	0	0	5.01884e-05	0	0	0	0	0	0	Unassigned
New,CleanUp,ReferenceOTU472052	0	0	0	0	0	0	0	5.01884e-05	0	0	0	0	0	0	Bacteria; Proteobacteria; Epsilonproteobacteria; Campylobacterales; Helicobacteraceae; Sulfurimonas
New,CleanUp,ReferenceOTU688327	0	0	0	0	0	0	0	5.01884e-05	0	0	0	0	0	0	Unassigned
New,CleanUp,ReferenceOTU105774	0	0	0	0	0	0	0	5.01884e-05	0	0	0	0	0	0	Unassigned
New,CleanUp,ReferenceOTU297439	0	0	8.9102e-06	0	0	3.36642e-05	0	0	0	7.37354e-06	0	0	0	0	Unassigned
New,CleanUp,ReferenceOTU621254	0	0	0	0	0	0	0	0	4.99255e-05	0	0	0	0	0	Bacteria; Proteobacteria; Epsilonproteobacteria; Campylobacterales; Helicobacteraceae; Sulfurimonas; uncultured bacterium
New,CleanUp,ReferenceOTU294985	0	0	0	0	0	3.06038e-05	2.63985e-06	0	0	1.65905e-05	0	0	0	0	Unassigned
New,ReferenceOTU214	0	0	0	0	0	3.57045e-05	0	1.41155e-05	0	0	0	0	0	0	Unassigned
New,CleanUp,ReferenceOTU424001	0	0	1.89342e-05	0	0	0	2.90384e-05	0	0	1.84339e-06	0	0	0	0	Bacteria; Aquificae; Aquificae; Aquificales; Desulfurobacteriaceae; Desulfurobacterium
New,CleanUp,ReferenceOTU420758	0	0	0	0	0	0	0	0	0	4.97714e-05	0	0	0	0	Unassigned
New,CleanUp,ReferenceOTU974421	0	0	0	0	0	5.10064e-06	0	3.29362e-05	1.16493e-05	0	0	0	0	0	Bacteria; Proteobacteria; Epsilonproteobacteria; Nautiliales; Nautiliaceae
New,ReferenceOTU1568	0	0	0	0	0	0	0	0	1.66418e-06	4.7928e-05	0	0	0	0	Bacteria; Aquificae; Aquificae; Aquificales; Desulfurobacteriaceae; Desulfurobacterium
AB193990,1,1459	0	0	0	0	0	3.06038e-06	3.95978e-06	0	0	4.23979e-05	0	0	0	0	Archaea; Euryarchaeota; Archaeoglobi; Archaeoglobales; Archaeoglobaceae; Archaeoglobus
New,CleanUp,ReferenceOTU229578	0	0	0	0	0	2.44831e-05	1.31993e-06	2.35258e-05	0	0	0	0	0	0	Bacteria; Proteobacteria; Epsilonproteobacteria; Campylobacterales; Helicobacteraceae; Sulfurimonas; uncultured bacterium
New,CleanUp,ReferenceOTU179133	0	0	0	0	0	0	0	0	8.32092e-06	4.05545e-05	0	0	0	0	Archaea; Crenarchaeota; Thermoprotei; Thermoproteales; Thermoproteaceae; uncultured; uncultured archaeon
New,CleanUp,ReferenceOTU36381	0	0	0	0	0	2.85636e-05	1.7159e-05	3.13678e-06	0	0	0	0	0	0	Bacteria; Proteobacteria; Epsilonproteobacteria; Campylobacterales; Helicobacteraceae; Sulfurovum
New,CleanUp,ReferenceOTU883459	0	0	0	0	0	2.95837e-05	1.45192e-05	4.70517e-06	0	0	0	0	0	0	Bacteria; Proteobacteria; Epsilonproteobacteria; Campylobacterales; Helicobacteraceae; Sulfurovum; uncultured bacterium
New,CleanUp,ReferenceOTU653333	0	0	0	0	0	3.77447e-05	0	0	0	1.10603e-05	0	0	0	0	Bacteria; Aquificae; Aquificae; Aquificales; Aquificaceae; Aquifex
New,CleanUp,ReferenceOTU160409	0	0	0	0	0	7.1409e-06	5.27971e-06	3.13678e-05	4.99255e-06	0	0	0	0	0	Bacteria; Proteobacteria; Epsilonproteobacteria; Campylobacterales; Campylobacteraceae; Arcobacter; uncultured bacterium
New,CleanUp,ReferenceOTU440391	0	0	0	0	0	0	2.63985e-06	0	0	4.60846e-05	0	0	0	0	Bacteria; Aquificae; Aquificae; Aquificales; Desulfurobacteriaceae; Desulfurobacterium
New,CleanUp,ReferenceOTU723737	0	0	0	0	0	1.53019e-05	2.24387e-05	1.09787e-05	0	0	0	0	0	0	Bacteria; BD1-5; uncultured organism; uncultured organism; uncultured organism; uncultured organism; uncultured organism
New,CleanUp,ReferenceOTU326399	0	0	0	0	0	0	0	4.86201e-05	0	0	0	0	0	0	Bacteria; Acidobacteria; Holophagae; Acanthopleuribacterales; Acanthopleuribacteraceae; Thermotomaculum; uncultured bacterium
New,CleanUp,ReferenceOTU635806	0	0	0	0	0	0	0	4.86201e-05	0	0	0	0	0	0	Bacteria; Proteobacteria; Epsilonproteobacteria; Nautiliales; Nautiliaceae; Nitratifractor
New,CleanUp,ReferenceOTU461174	0	0	0	0	0	0	0	4.86201e-05	0	0	0	0	0	0	Bacteria; Proteobacteria; Epsilonproteobacteria; Nautiliales; Nautiliaceae; Lebetimonas
New,CleanUp,ReferenceOTU165602	0	0	0	0	0	0	0	4.86201e-05	0	0	0	0	0	0	Unassigned
New,CleanUp,ReferenceOTU577955	0	0	0	0	0	0	0	4.86201e-05	0	0	0	0	0	0	Unassigned
New,ReferenceOTU1142	0	0	0	0	0	2.55032e-05	0	3.13678e-06	1.99702e-05	0	0	0	0	0	Bacteria; Proteobacteria; Epsilonproteobacteria; Nautiliales; Nautiliaceae; Lebetimonas
New,CleanUp,ReferenceOTU695212	0	0	0	0	0	4.69259e-05	0	1.56839e-06	0	0	0	0	0	0	Bacteria; Proteobacteria; Epsilonproteobacteria; Nautiliales; Nautiliaceae; Lebetimonas
New,CleanUp,ReferenceOTU756282	0	0	0	0	0	0	1.31993e-06	0	4.16046e-05	5.53016e-06	0	0	0	0	Bacteria; Thermodesulfobacteria; Thermodesulfobacteria; Thermodesulfobacteriales; Thermodesulfobacteriaceae; Caldimicrobium
New,CleanUp,ReferenceOTU350081	0	0	0	0	0	2.34629e-05	0	0	2.49628e-05	0	0	0	0	0	Archaea; Euryarchaeota; Halobacteria; Halobacteriales; Miscellaneous Euryarchaeotic Group(MEG); uncultured euryarchaeote Alv-FOS5; uncultured euryarchaeote Alv-FOS5
New,CleanUp,ReferenceOTU62226	0	0	0	0	0	9.18115e-06	0	3.92097e-05	0	0	0	0	0	0	Bacteria; Proteobacteria; Epsilonproteobacteria; Nautiliales; Nautiliaceae; Thioreductor
New,CleanUp,ReferenceOTU505675	0	0	0	0	0	0	0	2.66626e-05	2.16344e-05	0	0	0	0	0	Bacteria; Proteobacteria; Epsilonproteobacteria; Campylobacterales; Helicobacteraceae; Sulfurovum; uncultured bacterium
New,CleanUp,ReferenceOTU419998	0	0	0	0	0	2.95837e-05	9.23948e-06	9.41033e-06	0	0	0	0	0	0	Bacteria; Proteobacteria; Epsilonproteobacteria; Campylobacterales; Campylobacteraceae; Arcobacter; uncultured bacterium
New,CleanUp,ReferenceOTU659478	0	0	1.11378e-06	0	0	4.08051e-05	0	6.27356e-06	0	0	0	0	0	0	Bacteria; Proteobacteria; Epsilonproteobacteria; Nautiliales; Nautiliaceae; Caminibacter
New,CleanUp,ReferenceOTU477513	0	0	0	0	0	2.85636e-05	0	6.27356e-06	1.33135e-05	0	0	0	0	0	Bacteria; Proteobacteria; Epsilonproteobacteria; Nautiliales; Nautiliaceae; Caminibacter; uncultured bacterium
New,CleanUp,ReferenceOTU67755	0	0	0	0	0	2.34629e-05	1.05594e-05	1.41155e-05	0	0	0	0	0	0	Bacteria; Candidate division SR1; uncultured bacterium; uncultured bacterium; uncultured bacterium; uncultured bacterium; uncultured bacterium
New,CleanUp,ReferenceOTU80616	0	0	0	0	0	1.02013e-06	0	4.70517e-05	0	0	0	0	0	0	Unassigned
New,CleanUp,ReferenceOTU89378	0	0	0	0	0	4.48856e-05	0	3.13678e-06	0	0	0	0	0	0	Bacteria; Aquificae; Aquificae; Aquificales; Desulfurobacteriaceae
New,CleanUp,ReferenceOTU85940	0	0	0	0	0	4.08051e-06	0	4.39149e-05	0	0	0	0	0	0	Bacteria; Proteobacteria; Deltaproteobacteria; Desulfobacterales; Desulfobulbaceae; Desulfobulbus; uncultured bacterium
New,CleanUp,ReferenceOTU237126	0	0	0	0	0	1.73422e-05	3.95978e-06	2.66626e-05	0	0	0	0	0	0	Bacteria; Proteobacteria; Epsilonproteobacteria; Campylobacterales; Helicobacteraceae; Sulfurimonas
ADEN01000012,3720,5257	0	1.26604e-05	3.34133e-06	2.45309e-06	0	0	0	0	0	2.94942e-05	0	0	0	0	Bacteria; Actinobacteria; Actinobacteria; Bifidobacteriales; Bifidobacteriaceae; Bifidobacterium
New,CleanUp,ReferenceOTU727158	0	0	0	0	0	0	0	0	0	4.7928e-05	0	0	0	0	Bacteria; Proteobacteria; Epsilonproteobacteria; Nautiliales; Nautiliaceae; Nitratifractor; uncultured bacterium
New,CleanUp,ReferenceOTU578093	0	0	0	0	0	0	0	0	0	4.7928e-05	0	0	0	0	Bacteria; Proteobacteria; Epsilonproteobacteria; Nautiliales; Nautiliaceae; Nitratifractor; uncultured bacterium
New,CleanUp,ReferenceOTU455668	0	0	0	0	0	0	0	0	0	4.7928e-05	0	0	0	0	Bacteria; Candidate division OP3
New,CleanUp,ReferenceOTU88066	0	0	0	0	0	0	0	0	0	4.7928e-05	0	0	0	0	Bacteria; Aquificae; Aquificae; Aquificales; Desulfurobacteriaceae; Desulfurobacterium
New,CleanUp,ReferenceOTU480800	0	0	0	0	0	2.04026e-06	0	4.07781e-05	4.99255e-06	0	0	0	0	0	Bacteria; Proteobacteria; Epsilonproteobacteria; Campylobacterales; Helicobacteraceae; Sulfurimonas
AY672540,1,1472	0	0	0	0	0	5.10064e-06	1.31993e-06	2.19574e-05	8.32092e-06	1.10603e-05	0	0	0	0	Bacteria; Proteobacteria; Epsilonproteobacteria; Campylobacterales; Helicobacteraceae
AB019749,1,1399	0	0	2.22755e-06	0	0	0	0	4.54833e-05	0	0	0	0	0	0	Archaea; Euryarchaeota; Halobacteria; Halobacteriales; Deep Sea Hydrothermal Vent Gp 6(DHVEG-6); unidentified archaeon; unidentified archaeon
New,CleanUp,ReferenceOTU620481	0	0	0	0	0	2.44831e-05	0	1.56839e-06	2.16344e-05	0	0	0	0	0	Bacteria; Proteobacteria; Epsilonproteobacteria; Nautiliales; Nautiliaceae; Caminibacter
New,CleanUp,ReferenceOTU117904	0	0	1.11378e-06	0	0	1.02013e-06	0	4.54833e-05	0	0	0	0	0	0	Bacteria; Proteobacteria; Epsilonproteobacteria; Nautiliales; Nautiliaceae; Nitratifractor
New,CleanUp,ReferenceOTU195239	0	0	0	0	0	0	0	4.07781e-05	6.65674e-06	0	0	0	0	0	Unassigned
New,CleanUp,ReferenceOTU416407	0	0	0	0	0	2.04026e-06	0	2.03891e-05	2.49628e-05	0	0	0	0	0	Bacteria; Proteobacteria; Epsilonproteobacteria; Campylobacterales; Helicobacteraceae; Sulfurovum; uncultured bacterium
New,CleanUp,ReferenceOTU224319	0	0	0	0	0	3.46844e-05	0	1.09787e-05	1.66418e-06	0	0	0	0	0	Bacteria; Proteobacteria; Epsilonproteobacteria; Campylobacterales; Campylobacteraceae; Arcobacter; uncultured epsilon proteobacterium
New,CleanUp,ReferenceOTU592865	0	0	0	0	0	1.12214e-05	0	3.60729e-05	0	0	0	0	0	0	Bacteria; Proteobacteria; Epsilonproteobacteria; Nautiliales; Nautiliaceae; Thioreductor
New,CleanUp,ReferenceOTU272009	0	0	0	0	0	1.12214e-05	0	3.60729e-05	0	0	0	0	0	0	Bacteria; Proteobacteria; Epsilonproteobacteria; Nautiliales; Nautiliaceae; uncultured; uncultured proteobacterium
New,CleanUp,ReferenceOTU877967	0	0	1.11378e-06	0	0	8.16103e-06	2.37587e-05	1.41155e-05	0	0	0	0	0	0	Bacteria; Proteobacteria; Gammaproteobacteria; Vibrionales; Vibrionaceae; Photobacterium; uncultured bacterium
New,CleanUp,ReferenceOTU746625	0	0	0	0	0	0	0	4.54833e-05	1.66418e-06	0	0	0	0	0	Bacteria; Proteobacteria; Epsilonproteobacteria; Nautiliales; Nautiliaceae; Nitratifractor; uncultured bacterium
New,CleanUp,ReferenceOTU353109	0	0	0	0	0	2.95837e-05	0	1.25471e-05	4.99255e-06	0	0	0	0	0	Bacteria; Proteobacteria; Epsilonproteobacteria; Nautiliales; Nautiliaceae; Lebetimonas
New,CleanUp,ReferenceOTU469928	0	0	0	0	0	0	0	4.70517e-05	0	0	0	0	0	0	Bacteria; Proteobacteria; Epsilonproteobacteria; Nautiliales; Nautiliaceae; Lebetimonas
New,CleanUp,ReferenceOTU1023026	0	0	0	0	0	0	0	4.70517e-05	0	0	0	0	0	0	Unassigned
New,ReferenceOTU1175	0	0	0	0	0	4.08051e-06	1.31993e-06	0	4.16046e-05	0	0	0	0	0	Bacteria; Proteobacteria; Epsilonproteobacteria; Nautiliales; Nautiliaceae; uncultured; uncultured bacterium
New,CleanUp,ReferenceOTU305075	0	0	0	0	0	4.38655e-05	0	3.13678e-06	0	0	0	0	0	0	Bacteria; Proteobacteria; Epsilonproteobacteria; Nautiliales; Nautiliaceae; uncultured; uncultured epsilon proteobacterium
New,CleanUp,ReferenceOTU1001472	0	0	0	0	0	8.16103e-06	1.97989e-05	1.72523e-05	1.66418e-06	0	0	0	0	0	Bacteria; Bacteroidetes; Cytophagia; Cytophagales; Flammeovirgaceae; uncultured; uncultured bacterium
New,CleanUp,ReferenceOTU132369	0	0	0	0	0	0	0	0	4.65972e-05	0	0	0	0	0	Unassigned
New,CleanUp,ReferenceOTU18482	0	0	0	0	0	1.02013e-06	0	4.54833e-05	0	0	0	0	0	0	Unassigned
New,CleanUp,ReferenceOTU20169	0	0	0	1.22655e-06	0	2.95837e-05	0	1.56839e-05	0	0	0	0	0	0	Bacteria; Proteobacteria; Epsilonproteobacteria; Campylobacterales; Helicobacteraceae; Sulfurovum; uncultured epsilon proteobacterium
New,CleanUp,ReferenceOTU1021188	0	0	0	0	0	4.48856e-05	0	1.56839e-06	0	0	0	0	0	0	Bacteria; Proteobacteria; Epsilonproteobacteria; Nautiliales; Nautiliaceae; Caminibacter; uncultured bacterium
New,CleanUp,ReferenceOTU838381	0	0	0	0	0	5.10064e-06	0	3.45046e-05	4.99255e-06	1.84339e-06	0	0	0	0	Bacteria; Proteobacteria; Epsilonproteobacteria; Campylobacterales; Helicobacteraceae; Sulfurovum; uncultured bacterium
New,CleanUp,ReferenceOTU469066	0	0	0	0	0	4.28454e-05	0	0	3.32837e-06	0	0	0	0	0	Bacteria; Proteobacteria; Epsilonproteobacteria; Nautiliales; Nautiliaceae; Caminibacter
New,CleanUp,ReferenceOTU463007	0	0	0	0	0	1.32617e-05	0	1.56839e-06	0	3.13376e-05	0	0	0	0	Unassigned
New,CleanUp,ReferenceOTU53699	0	0	0	0	0	0	0	0	0	4.60846e-05	0	0	0	0	Bacteria; Aquificae; Aquificae; Aquificales; Desulfurobacteriaceae; Desulfurobacterium
New,CleanUp,ReferenceOTU781816	0	0	0	0	0	0	5.27971e-06	4.07781e-05	0	0	0	0	0	0	Bacteria; Proteobacteria; Deltaproteobacteria; Desulfobacterales; Desulfobulbaceae; Desulfobulbus; uncultured bacterium
New,CleanUp,ReferenceOTU16482	0	0	0	0	0	0	5.27971e-06	0	0	4.05545e-05	0	0	0	0	Bacteria; Proteobacteria; Deltaproteobacteria; Myxococcales; uncultured; uncultured bacterium; uncultured bacterium
New,CleanUp,ReferenceOTU430984	0	0	0	0	0	3.77447e-05	0	4.70517e-06	3.32837e-06	0	0	0	0	0	Bacteria; Proteobacteria; Epsilonproteobacteria; Campylobacterales; Helicobacteraceae; Sulfurovum; uncultured bacterium
New,CleanUp,ReferenceOTU1057140	0	0	0	0	0	9.18115e-06	0	2.97994e-05	6.65674e-06	0	0	0	0	0	Bacteria; Proteobacteria; Epsilonproteobacteria; Nautiliales; Nautiliaceae; Caminibacter
New,CleanUp,ReferenceOTU520975	0	0	0	0	0	0	2.63985e-06	4.70517e-06	3.82762e-05	0	0	0	0	0	Bacteria; Proteobacteria; Epsilonproteobacteria; Nautiliales; Nautiliaceae
New,CleanUp,ReferenceOTU36440	0	0	0	0	3.2542e-06	0	0	4.23465e-05	0	0	0	0	0	0	Bacteria; Bacteroidetes; VC2,1 Bac22; uncultured bacterium; uncultured bacterium; uncultured bacterium; uncultured bacterium
New,CleanUp,ReferenceOTU612901	0	0	1.11378e-06	0	0	0	0	3.60729e-05	8.32092e-06	0	0	0	0	0	Bacteria; Proteobacteria; Epsilonproteobacteria; Nautiliales; Nautiliaceae; uncultured; uncultured proteobacterium
New,CleanUp,ReferenceOTU544620	0	0	0	0	0	0	0	4.54833e-05	0	0	0	0	0	0	Bacteria; Proteobacteria; Epsilonproteobacteria; Campylobacterales; Helicobacteraceae; Sulfurimonas; uncultured bacterium
New,CleanUp,ReferenceOTU1064382	0	0	0	0	0	3.06038e-06	0	4.23465e-05	0	0	0	0	0	0	Bacteria; Proteobacteria; Deltaproteobacteria; Desulfobacterales; Desulfobulbaceae; Desulfobulbus; uncultured bacterium
New,CleanUp,ReferenceOTU695817	0	0	0	0	0	3.06038e-06	0	4.23465e-05	0	0	0	0	0	0	Bacteria; Proteobacteria; Epsilonproteobacteria; Campylobacterales; Helicobacteraceae; Sulfurimonas; uncultured bacterium
New,CleanUp,ReferenceOTU700205	0	0	0	0	0	0	0	2.66626e-05	1.49777e-05	3.68677e-06	0	0	0	0	Bacteria; Proteobacteria; Epsilonproteobacteria; Campylobacterales; Campylobacteraceae; Sulfurospirillum; uncultured bacterium
New,CleanUp,ReferenceOTU546635	0	0	0	0	0	4.08051e-06	0	1.56839e-05	4.99255e-06	2.02772e-05	0	0	0	0	Bacteria; BHI80-139
New,CleanUp,ReferenceOTU321542	0	0	0	0	0	2.14227e-05	0	2.35258e-05	0	0	0	0	0	0	Unassigned
New,CleanUp,ReferenceOTU1011943	0	0	0	0	0	2.14227e-05	0	2.35258e-05	0	0	0	0	0	0	Bacteria; Proteobacteria; Epsilonproteobacteria; Campylobacterales; Helicobacteraceae; Sulfurovum; uncultured bacterium
New,CleanUp,ReferenceOTU788643	0	0	0	0	0	3.06038e-06	0	3.45046e-05	0	7.37354e-06	0	0	0	0	Bacteria; Proteobacteria; Epsilonproteobacteria; Nautiliales; Nautiliaceae; Nitratifractor; uncultured epsilon proteobacterium
New,ReferenceOTU443	0	0	0	0	0	0	0	0	4.4933e-05	0	0	0	0	0	Bacteria; Aquificae; Aquificae; Aquificales; Desulfurobacteriaceae; Desulfurobacterium
New,CleanUp,ReferenceOTU437780	0	0	0	0	0	0	0	0	4.4933e-05	0	0	0	0	0	Bacteria; Proteobacteria; Epsilonproteobacteria; Nautiliales; Nautiliaceae; uncultured; uncultured bacterium
FR853035,1,1480	0	0	0	0	0	6.12077e-06	2.63985e-06	3.60729e-05	0	0	0	0	0	0	Bacteria; Proteobacteria; Epsilonproteobacteria; Campylobacterales; Helicobacteraceae; Sulfurovum
New,CleanUp,ReferenceOTU704855	0	0	0	0	0	0	0	3.13678e-06	4.16046e-05	0	0	0	0	0	Bacteria; BD1-5; uncultured bacterium; uncultured bacterium; uncultured bacterium; uncultured bacterium; uncultured bacterium
New,CleanUp,ReferenceOTU359635	0	0	0	0	0	6.12077e-06	0	2.97994e-05	4.99255e-06	3.68677e-06	0	0	0	0	Bacteria; BHI80-139
JQ611145,1,1374	0	0	0	0	0	0	4.09177e-05	1.56839e-06	0	1.84339e-06	0	0	0	0	Bacteria; Proteobacteria; Epsilonproteobacteria; Campylobacterales; Helicobacteraceae; Sulfurovum; uncultured Sulfurovum sp,
New,CleanUp,ReferenceOTU204445	0	0	0	0	0	1.42818e-05	2.37587e-05	6.27356e-06	0	0	0	0	0	0	Bacteria; Proteobacteria; Epsilonproteobacteria; Campylobacterales; Helicobacteraceae; Sulfurimonas
New,CleanUp,ReferenceOTU145950	0	0	0	0	0	3.06038e-06	1.45192e-05	2.66626e-05	0	0	0	0	0	0	Bacteria; Proteobacteria; Epsilonproteobacteria; Campylobacterales; Campylobacteraceae; Arcobacter; uncultured Arcobacter sp,
New,CleanUp,ReferenceOTU917501	0	0	0	0	0	0	0	0	0	4.42413e-05	0	0	0	0	Bacteria; Proteobacteria; Epsilonproteobacteria; Nautiliales; Nautiliaceae; Nitratifractor; uncultured bacterium
New,CleanUp,ReferenceOTU936908	0	0	0	0	0	0	0	0	0	4.42413e-05	0	0	0	0	Archaea; Marine Hydrothermal Vent Group 1(MHVG-1); uncultured archaeon; uncultured archaeon; uncultured archaeon; uncultured archaeon; uncultured archaeon
New,CleanUp,ReferenceOTU802174	0	0	0	0	0	3.26441e-05	0	1.56839e-06	9.98511e-06	0	0	0	0	0	Unassigned
New,CleanUp,ReferenceOTU968783	0	0	0	0	0	0	0	4.07781e-05	3.32837e-06	0	0	0	0	0	Unassigned
New,CleanUp,ReferenceOTU325995	0	0	0	0	0	5.10064e-06	3.5638e-05	0	3.32837e-06	0	0	0	0	0	Bacteria; Proteobacteria; Epsilonproteobacteria; Campylobacterales; Helicobacteraceae; Sulfurovum; uncultured bacterium
New,CleanUp,ReferenceOTU1120106	0	0	0	0	0	3.77447e-05	0	6.27356e-06	0	0	0	0	0	0	Bacteria; Proteobacteria; Epsilonproteobacteria; Campylobacterales; Campylobacteraceae; Arcobacter; uncultured epsilon proteobacterium
New,CleanUp,ReferenceOTU807034	0	0	0	0	0	3.06038e-06	0	3.92097e-05	1.66418e-06	0	0	0	0	0	Bacteria; Proteobacteria; Epsilonproteobacteria; Campylobacterales; Helicobacteraceae; Sulfurovum; uncultured epsilon proteobacterium
New,CleanUp,ReferenceOTU698951	0	0	0	0	0	0	0	4.39149e-05	0	0	0	0	0	0	Unassigned
New,CleanUp,ReferenceOTU985552	0	0	0	0	0	0	0	4.39149e-05	0	0	0	0	0	0	Bacteria; Proteobacteria; Gammaproteobacteria; Thiotrichales; Piscirickettsiaceae; Thiomicrospira; uncultured gamma proteobacterium
New,CleanUp,ReferenceOTU141369	0	0	0	0	0	0	0	4.39149e-05	0	0	0	0	0	0	Unassigned
New,CleanUp,ReferenceOTU266792	0	0	0	0	0	0	0	4.39149e-05	0	0	0	0	0	0	Unassigned
New,CleanUp,ReferenceOTU410400	0	0	0	0	0	0	0	4.39149e-05	0	0	0	0	0	0	Unassigned
JN662281,1,1350	0	0	0	0	0	6.12077e-06	1.31993e-06	2.97994e-05	6.65674e-06	0	0	0	0	0	Bacteria; Proteobacteria; Epsilonproteobacteria; Campylobacterales; Helicobacteraceae; Sulfurovum
New,CleanUp,ReferenceOTU665976	0	0	0	0	0	9.18115e-06	0	3.45046e-05	0	0	0	0	0	0	Bacteria; Proteobacteria; Epsilonproteobacteria; Nautiliales; Nautiliaceae; Nitratifractor; uncultured bacterium
New,CleanUp,ReferenceOTU825820	0	0	0	0	0	3.57045e-05	0	7.84194e-06	0	0	0	0	0	0	Bacteria; Proteobacteria; Epsilonproteobacteria; Nautiliales; Nautiliaceae; Caminibacter
New,CleanUp,ReferenceOTU419334	0	0	0	0	0	1.02013e-05	0	0	3.32837e-05	0	0	0	0	0	Bacteria; Proteobacteria; Epsilonproteobacteria; Campylobacterales; Helicobacteraceae; Sulfurimonas; uncultured bacterium
New,CleanUp,ReferenceOTU114786	0	0	0	0	0	4.18253e-05	0	1.56839e-06	0	0	0	0	0	0	Unassigned
New,CleanUp,ReferenceOTU580909	0	0	0	0	0	9.18115e-06	2.63985e-06	3.13678e-05	0	0	0	0	0	0	Bacteria; Proteobacteria; Epsilonproteobacteria; Nautiliales; Nautiliaceae; Nitratifractor; uncultured bacterium
New,CleanUp,ReferenceOTU529557	0	0	0	0	0	5.10064e-06	0	3.13678e-06	3.49479e-05	0	0	0	0	0	Bacteria; Proteobacteria; Epsilonproteobacteria; Campylobacterales; Helicobacteraceae; Sulfurimonas; uncultured bacterium
AY280446,1,1065	0	0	0	0	0	0	0	6.27356e-06	0	3.68677e-05	0	0	0	0	Archaea; Euryarchaeota; Thermococci; Thermococcales; Thermococcaceae; Thermococcus
New,CleanUp,ReferenceOTU1027810	0	0	0	0	0	0	0	2.97994e-05	1.33135e-05	0	0	0	0	0	Bacteria; Proteobacteria; Gammaproteobacteria; Thiotrichales; Piscirickettsiaceae; Thiomicrospira; uncultured bacterium
New,CleanUp,ReferenceOTU794561	0	0	0	0	0	3.77447e-05	0	0	1.66418e-06	3.68677e-06	0	0	0	0	Bacteria; Aquificae; Aquificae; Aquificales; Desulfurobacteriaceae
AB235323,1,1432	0	0	0	0	0	3.9785e-05	0	3.13678e-06	0	0	0	0	0	0	Bacteria; Proteobacteria; Epsilonproteobacteria; Nautiliales; Nautiliaceae; Caminibacter; uncultured bacterium
New,CleanUp,ReferenceOTU89452	0	0	0	0	0	5.10064e-06	0	3.60729e-05	1.66418e-06	0	0	0	0	0	Bacteria; Proteobacteria; Epsilonproteobacteria; Campylobacterales; Helicobacteraceae; Sulfurimonas; uncultured bacterium
New,CleanUp,ReferenceOTU291940	0	0	0	0	0	5.10064e-06	0	3.76413e-05	0	0	0	0	0	0	Bacteria; Proteobacteria; Epsilonproteobacteria; Campylobacterales; Helicobacteraceae; Sulfurimonas; uncultured bacterium
New,ReferenceOTU74	0	0	0	0	0	0	0	3.60729e-05	6.65674e-06	0	0	0	0	0	Unassigned
New,CleanUp,ReferenceOTU550281	0	0	0	0	0	0	0	9.41033e-06	3.32837e-05	0	0	0	0	0	Bacteria; Proteobacteria; Epsilonproteobacteria; Campylobacterales; Helicobacteraceae; Sulfurimonas; uncultured bacterium
New,CleanUp,ReferenceOTU229370	0	0	0	0	0	0	1.31993e-06	3.13678e-05	9.98511e-06	0	0	0	0	0	Bacteria; Proteobacteria; Epsilonproteobacteria; Campylobacterales; Campylobacteraceae; Thiofractor; uncultured bacterium
New,CleanUp,ReferenceOTU486492	0	0	0	0	0	6.12077e-06	0	2.8231e-05	8.32092e-06	0	0	0	0	0	Bacteria; Proteobacteria; Epsilonproteobacteria; Campylobacterales; Helicobacteraceae; Sulfurimonas; uncultured bacterium
New,CleanUp,ReferenceOTU201721	0	0	0	0	0	1.12214e-05	2.50786e-05	6.27356e-06	0	0	0	0	0	0	Bacteria; Proteobacteria; Epsilonproteobacteria; Campylobacterales; Helicobacteraceae; Sulfurovum; uncultured epsilon proteobacterium
New,CleanUp,ReferenceOTU342781	0	0	0	0	0	3.46844e-05	0	7.84194e-06	0	0	0	0	0	0	Bacteria; Proteobacteria; Epsilonproteobacteria; Nautiliales; Nautiliaceae
New,CleanUp,ReferenceOTU1064028	0	0	0	0	0	0	4.09177e-05	1.56839e-06	0	0	0	0	0	0	Unassigned
New,CleanUp,ReferenceOTU1081723	0	0	0	0	0	0	0	4.07781e-05	1.66418e-06	0	0	0	0	0	Unassigned
New,CleanUp,ReferenceOTU298262	0	0	0	0	0	0	0	0	0	4.23979e-05	0	0	0	0	Bacteria; Proteobacteria; Epsilonproteobacteria; Nautiliales; Nautiliaceae; Nitratifractor; uncultured bacterium
DQ412066,1,1393	0	0	0	0	0	0	0	0	0	4.23979e-05	0	0	0	0	Bacteria; Proteobacteria; Gammaproteobacteria; Pseudomonadales; Moraxellaceae; Acinetobacter; uncultured bacterium
CP002372,812466,813878	0	0	0	0	0	0	0	0	0	4.23979e-05	0	0	0	0	Archaea; Euryarchaeota; Thermococci; Thermococcales; Thermococcaceae; Thermococcus
New,CleanUp,ReferenceOTU982818	0	0	0	0	0	1.02013e-06	0	3.13678e-05	9.98511e-06	0	0	0	0	0	Archaea; Euryarchaeota; Halobacteria; Halobacteriales; Deep Sea Hydrothermal Vent Gp 6(DHVEG-6)
New,CleanUp,ReferenceOTU930614	0	0	0	0	0	0	0	4.23465e-05	0	0	0	0	0	0	Bacteria; Proteobacteria; Gammaproteobacteria; Thiotrichales; Piscirickettsiaceae; Thiomicrospira; uncultured gamma proteobacterium
New,CleanUp,ReferenceOTU748035	0	0	0	0	0	0	0	4.23465e-05	0	0	0	0	0	0	Unassigned
New,CleanUp,ReferenceOTU24302	0	0	0	0	0	0	0	4.23465e-05	0	0	0	0	0	0	Bacteria; Caldiserica; Caldisericia; Caldisericales; Caldisericaceae; Caldisericum
New,CleanUp,ReferenceOTU329830	0	0	0	0	0	0	0	4.23465e-05	0	0	0	0	0	0	Bacteria; Proteobacteria
New,CleanUp,ReferenceOTU138638	0	0	0	0	0	0	0	4.23465e-05	0	0	0	0	0	0	Bacteria; Proteobacteria; Epsilonproteobacteria; Campylobacterales; Helicobacteraceae; Sulfurimonas; uncultured bacterium
New,CleanUp,ReferenceOTU89137	0	0	0	0	0	0	0	4.23465e-05	0	0	0	0	0	0	Bacteria; Proteobacteria; Deltaproteobacteria; Desulfurellales; Desulfurellaceae; Hippea; uncultured delta proteobacterium
New,CleanUp,ReferenceOTU219886	0	0	0	0	0	0	0	4.23465e-05	0	0	0	0	0	0	Bacteria; Proteobacteria; Epsilonproteobacteria; Campylobacterales; Helicobacteraceae; Sulfurimonas; uncultured bacterium
New,CleanUp,ReferenceOTU612866	0	0	0	0	0	5.10064e-06	3.5638e-05	1.56839e-06	0	0	0	0	0	0	Bacteria; Bacteroidetes; Flavobacteriia; Flavobacteriales; Flavobacteriaceae; uncultured; uncultured Bacteroidetes bacterium
New,CleanUp,ReferenceOTU474870	0	0	0	0	0	0	0	1.72523e-05	2.49628e-05	0	0	0	0	0	Bacteria; Proteobacteria; Epsilonproteobacteria; Nautiliales; Nautiliaceae
New,CleanUp,ReferenceOTU7036	0	0	0	0	0	6.12077e-06	0	3.60729e-05	0	0	0	0	0	0	Bacteria; Proteobacteria; Epsilonproteobacteria; Campylobacterales; Helicobacteraceae; Sulfurovum
New,CleanUp,ReferenceOTU1097100	0	0	2.22755e-06	0	0	1.32617e-05	1.31993e-06	2.03891e-05	4.99255e-06	0	0	0	0	0	Bacteria; Proteobacteria; Epsilonproteobacteria; Campylobacterales; Helicobacteraceae; Sulfurovum; uncultured bacterium
New,CleanUp,ReferenceOTU279155	0	0	0	0	0	3.87649e-05	0	1.56839e-06	0	1.84339e-06	0	0	0	0	Bacteria; Proteobacteria; Epsilonproteobacteria; Nautiliales; Nautiliaceae; Nitratifractor; uncultured bacterium
New,ReferenceOTU405	0	0	0	0	0	0	0	1.88207e-05	2.32986e-05	0	0	0	0	0	Unassigned
New,CleanUp,ReferenceOTU945938	0	0	0	0	0	2.75435e-05	1.31993e-06	1.56839e-06	1.16493e-05	0	0	0	0	0	Bacteria; Proteobacteria; Epsilonproteobacteria; Nautiliales; Nautiliaceae; Thioreductor
New,CleanUp,ReferenceOTU298372	0	0	1.11378e-06	0	0	3.67246e-05	2.63985e-06	1.56839e-06	0	0	0	0	0	0	Bacteria; Proteobacteria; Epsilonproteobacteria; Campylobacterales; Helicobacteraceae; Sulfurovum; uncultured bacterium
New,CleanUp,ReferenceOTU703138	0	0	0	0	0	3.46844e-05	3.95978e-06	0	3.32837e-06	0	0	0	0	0	Bacteria; Proteobacteria; Epsilonproteobacteria; Campylobacterales; Helicobacteraceae; Sulfurimonas; uncultured bacterium
New,CleanUp,ReferenceOTU272610	0	0	0	0	0	1.73422e-05	5.27971e-06	1.09787e-05	8.32092e-06	0	0	0	0	0	Bacteria; Proteobacteria; Epsilonproteobacteria; Campylobacterales; Campylobacteraceae; Arcobacter; uncultured epsilon proteobacterium
New,CleanUp,ReferenceOTU230046	0	0	0	0	0	0	1.31993e-06	0	0	4.05545e-05	0	0	0	0	Bacteria; Aquificae; Aquificae; Aquificales; Desulfurobacteriaceae; Desulfurobacterium
New,CleanUp,ReferenceOTU831535	0	0	1.11378e-06	0	0	2.04026e-06	3.69579e-05	0	1.66418e-06	0	0	0	0	0	Unassigned
New,CleanUp,ReferenceOTU279075	0	0	0	0	0	8.16103e-06	2.24387e-05	7.84194e-06	3.32837e-06	0	0	0	0	0	Bacteria; BD1-5; uncultured bacterium; uncultured bacterium; uncultured bacterium; uncultured bacterium; uncultured bacterium
New,CleanUp,ReferenceOTU471847	0	0	0	0	0	1.32617e-05	2.37587e-05	4.70517e-06	0	0	0	0	0	0	Bacteria; Proteobacteria; Epsilonproteobacteria; Campylobacterales; Helicobacteraceae; Sulfurovum
New,CleanUp,ReferenceOTU448138	0	0	0	0	0	4.08051e-06	0	3.76413e-05	0	0	0	0	0	0	Bacteria; Proteobacteria; Epsilonproteobacteria; Campylobacterales; Helicobacteraceae; Sulfurovum; uncultured epsilon proteobacterium
New,CleanUp,ReferenceOTU261287	0	0	0	0	0	0	0	2.66626e-05	1.49777e-05	0	0	0	0	0	Archaea; Euryarchaeota; Archaeoglobi; Archaeoglobales; Archaeoglobaceae; uncultured; uncultured archaeon
New,CleanUp,ReferenceOTU893884	0	0	0	0	0	0	0	0	4.16046e-05	0	0	0	0	0	Bacteria; Proteobacteria; Epsilonproteobacteria; Campylobacterales; Helicobacteraceae; Sulfurimonas; uncultured bacterium
New,CleanUp,ReferenceOTU376778	0	0	0	0	0	0	0	0	4.16046e-05	0	0	0	0	0	Unassigned
New,CleanUp,ReferenceOTU1136171	0	0	0	0	0	2.55032e-05	1.45192e-05	1.56839e-06	0	0	0	0	0	0	Bacteria; Proteobacteria; Epsilonproteobacteria; Campylobacterales; Helicobacteraceae; Sulfurimonas; uncultured epsilon proteobacterium
New,CleanUp,ReferenceOTU151606	0	0	0	0	1.08473e-06	4.08051e-06	3.16782e-05	4.70517e-06	0	0	0	0	0	0	Bacteria; Proteobacteria; Gammaproteobacteria; Alteromonadales; Colwelliaceae; Colwellia; uncultured bacterium
New,CleanUp,ReferenceOTU82965	0	0	0	0	0	3.36642e-05	0	7.84194e-06	0	0	0	0	0	0	Bacteria; Proteobacteria; Epsilonproteobacteria; Campylobacterales; Helicobacteraceae; Sulfurovum; uncultured bacterium
New,CleanUp,ReferenceOTU315432	0	0	0	0	0	5.10064e-06	0	3.29362e-05	3.32837e-06	0	0	0	0	0	Bacteria; Firmicutes; Clostridia; Thermoanaerobacterales; Thermodesulfobiaceae; Coprothermobacter
New,CleanUp,ReferenceOTU492414	0	0	3.4527e-05	0	0	0	0	0	4.99255e-06	1.84339e-06	0	0	0	0	Bacteria; Proteobacteria; Epsilonproteobacteria; Nautiliales; Nautiliaceae; Nitratifractor; uncultured bacterium
New,CleanUp,ReferenceOTU1117401	0	0	0	0	0	1.12214e-05	0	2.66626e-05	3.32837e-06	0	0	0	0	0	Bacteria; Proteobacteria; Epsilonproteobacteria; Campylobacterales; Helicobacteraceae; Sulfurimonas; uncultured bacterium
New,CleanUp,ReferenceOTU436375	0	0	0	0	0	1.02013e-06	0	2.35258e-05	1.66418e-05	0	0	0	0	0	Unassigned
New,CleanUp,ReferenceOTU211490	0	0	0	0	0	1.12214e-05	0	2.97994e-05	0	0	0	0	0	0	Bacteria; Proteobacteria; Epsilonproteobacteria; Nautiliales; Nautiliaceae; Thioreductor
New,ReferenceOTU770	0	0	0	0	0	0	0	1.09787e-05	2.99553e-05	0	0	0	0	0	Bacteria; Proteobacteria; Epsilonproteobacteria; Campylobacterales; Helicobacteraceae; Sulfurimonas
New,CleanUp,ReferenceOTU308355	0	0	0	0	0	2.34629e-05	1.58391e-05	1.56839e-06	0	0	0	0	0	0	Bacteria; Fusobacteria; Fusobacteriia; Fusobacteriales; Fusobacteriaceae; Psychrilyobacter; uncultured bacterium
New,CleanUp,ReferenceOTU616281	0	0	0	0	0	0	3.95978e-06	0	0	3.68677e-05	0	0	0	0	Unassigned
New,CleanUp,ReferenceOTU766096	0	0	0	0	0	0	0	4.07781e-05	0	0	0	0	0	0	Unassigned
New,CleanUp,ReferenceOTU239249	0	0	0	0	0	0	0	4.07781e-05	0	0	0	0	0	0	Bacteria; Proteobacteria; Epsilonproteobacteria; Campylobacterales; Campylobacteraceae; Thiofractor
New,CleanUp,ReferenceOTU614292	0	0	0	0	0	0	0	4.07781e-05	0	0	0	0	0	0	Unassigned
New,CleanUp,ReferenceOTU1142136	0	0	0	0	0	0	0	4.07781e-05	0	0	0	0	0	0	Bacteria; Proteobacteria; Epsilonproteobacteria; Nautiliales; Nautiliaceae; Caminibacter; uncultured bacterium
New,CleanUp,ReferenceOTU530159	0	0	0	0	0	0	0	4.07781e-05	0	0	0	0	0	0	Bacteria; Acidobacteria; Holophagae; Acanthopleuribacterales; Acanthopleuribacteraceae; Thermotomaculum
New,CleanUp,ReferenceOTU545711	0	0	0	0	0	2.34629e-05	0	1.72523e-05	0	0	0	0	0	0	Bacteria; Proteobacteria; Epsilonproteobacteria; Campylobacterales; Helicobacteraceae; Sulfurovum; uncultured bacterium
New,CleanUp,ReferenceOTU20227	0	0	0	0	0	3.06038e-06	0	3.76413e-05	0	0	0	0	0	0	Bacteria; Proteobacteria; Epsilonproteobacteria; Campylobacterales; Helicobacteraceae; Sulfurovum
New,CleanUp,ReferenceOTU672720	0	0	0	0	0	0	0	1.56839e-05	2.49628e-05	0	0	0	0	0	Bacteria; Proteobacteria; Epsilonproteobacteria; Campylobacterales; Campylobacteraceae; Thiofractor
New,CleanUp,ReferenceOTU223198	0	0	0	0	0	0	0	0	0	4.05545e-05	0	0	0	0	Bacteria; Proteobacteria; Epsilonproteobacteria; Nautiliales; Nautiliaceae
New,CleanUp,ReferenceOTU351472	0	0	0	0	0	9.18115e-06	0	3.13678e-05	0	0	0	0	0	0	Bacteria; Proteobacteria; Epsilonproteobacteria; Campylobacterales; Helicobacteraceae; Sulfurimonas; uncultured bacterium
New,CleanUp,ReferenceOTU155699	0	0	3.34133e-06	0	0	2.04026e-06	1.31993e-05	2.19574e-05	0	0	0	0	0	0	Bacteria; Proteobacteria; Epsilonproteobacteria; Campylobacterales; Helicobacteraceae; Sulfurimonas; uncultured bacterium
New,CleanUp,ReferenceOTU623704	0	0	0	0	0	9.18115e-06	1.97989e-05	1.56839e-06	9.98511e-06	0	0	0	0	0	Bacteria; BD1-5; uncultured bacterium; uncultured bacterium; uncultured bacterium; uncultured bacterium; uncultured bacterium
New,CleanUp,ReferenceOTU305085	0	0	0	0	0	1.02013e-06	1.05594e-05	1.72523e-05	1.16493e-05	0	0	0	0	0	Unassigned
New,CleanUp,ReferenceOTU408303	0	0	0	0	0	2.85636e-05	3.95978e-06	6.27356e-06	1.66418e-06	0	0	0	0	0	Bacteria; Proteobacteria; Epsilonproteobacteria; Nautiliales; Nautiliaceae; Caminibacter
New,CleanUp,ReferenceOTU1067795	0	0	0	0	0	1.02013e-05	3.95978e-06	6.27356e-06	1.99702e-05	0	0	0	0	0	Bacteria; Proteobacteria; Epsilonproteobacteria; Campylobacterales; Helicobacteraceae; Sulfurovum; uncultured epsilon proteobacterium
New,CleanUp,ReferenceOTU544152	0	0	0	0	0	1.02013e-06	0	3.92097e-05	0	0	0	0	0	0	Bacteria; Proteobacteria; Epsilonproteobacteria; Campylobacterales; Helicobacteraceae; Sulfurovum; uncultured epsilon proteobacterium
New,CleanUp,ReferenceOTU602245	0	0	0	0	0	1.02013e-06	0	3.92097e-05	0	0	0	0	0	0	Bacteria; Proteobacteria; Epsilonproteobacteria; Campylobacterales; Helicobacteraceae; Sulfurimonas; uncultured bacterium
New,CleanUp,ReferenceOTU377648	0	0	0	0	0	6.12077e-06	3.03583e-05	0	0	3.68677e-06	0	0	0	0	Bacteria; Proteobacteria; Epsilonproteobacteria; Campylobacterales; Helicobacteraceae; Sulfurovum; uncultured epsilon proteobacterium
New,CleanUp,ReferenceOTU837017	0	0	0	0	0	5.10064e-06	0	2.66626e-05	8.32092e-06	0	0	0	0	0	Bacteria; Proteobacteria; Epsilonproteobacteria; Nautiliales; Nautiliaceae; Nitratifractor; uncultured bacterium
New,CleanUp,ReferenceOTU1111985	0	0	0	0	0	3.57045e-05	2.63985e-06	1.56839e-06	0	0	0	0	0	0	Bacteria; Deferribacteres; Deferribacteres; Deferribacterales; Deferribacteraceae; uncultured; uncultured bacterium
New,CleanUp,ReferenceOTU882189	0	0	0	0	0	2.04026e-06	0	7.84194e-06	2.99553e-05	0	0	0	0	0	Archaea; Euryarchaeota; Thermococci; Thermococcales; Thermococcaceae
New,ReferenceOTU1077	0	0	0	0	0	1.02013e-05	2.63985e-05	3.13678e-06	0	0	0	0	0	0	Bacteria; Bacteroidetes; Flavobacteriia; Flavobacteriales; Schleiferiaceae; Schleiferia; uncultured Bacteroidetes bacterium
New,CleanUp,ReferenceOTU564409	0	0	0	0	0	0	0	4.70517e-06	3.49479e-05	0	0	0	0	0	Bacteria; Proteobacteria; Epsilonproteobacteria; Campylobacterales; Helicobacteraceae; Sulfurimonas; uncultured bacterium
New,CleanUp,ReferenceOTU417773	0	0	0	0	0	1.02013e-06	3.69579e-05	1.56839e-06	0	0	0	0	0	0	Bacteria; Proteobacteria; Epsilonproteobacteria; Campylobacterales; Helicobacteraceae; Sulfurovum; uncultured bacterium
New,CleanUp,ReferenceOTU175195	0	0	0	0	0	2.85636e-05	0	1.09787e-05	0	0	0	0	0	0	Bacteria; Bacteroidetes; VC2,1 Bac22
New,CleanUp,ReferenceOTU101028	0	0	0	0	0	8.16103e-06	0	3.13678e-05	0	0	0	0	0	0	Bacteria; Proteobacteria; Epsilonproteobacteria; Campylobacterales; Helicobacteraceae; Sulfurovum; uncultured epsilon proteobacterium
New,CleanUp,ReferenceOTU50482	0	0	0	0	0	5.10064e-06	0	1.25471e-05	3.32837e-06	1.84339e-05	0	0	0	0	Bacteria; BHI80-139
New,CleanUp,ReferenceOTU600491	0	0	0	0	0	0	0	3.60729e-05	3.32837e-06	0	0	0	0	0	Bacteria; Proteobacteria; Epsilonproteobacteria; Campylobacterales; Helicobacteraceae; Sulfurovum; uncultured bacterium
New,CleanUp,ReferenceOTU639826	0	0	0	0	0	3.46844e-05	0	4.70517e-06	0	0	0	0	0	0	Bacteria; Proteobacteria; Epsilonproteobacteria; Campylobacterales; Helicobacteraceae; Sulfurovum; uncultured epsilon proteobacterium
New,CleanUp,ReferenceOTU281365	0	0	0	0	0	6.12077e-06	6.59963e-06	2.66626e-05	0	0	0	0	0	0	Unassigned
New,CleanUp,ReferenceOTU138026	0	0	0	0	0	6.12077e-06	0	2.97994e-05	3.32837e-06	0	0	0	0	0	Bacteria; Proteobacteria; Epsilonproteobacteria; Campylobacterales; Helicobacteraceae; Sulfurovum; uncultured bacterium
New,CleanUp,ReferenceOTU859713	0	0	0	0	0	2.04026e-06	3.5638e-05	1.56839e-06	0	0	0	0	0	0	Bacteria; Proteobacteria; Epsilonproteobacteria; Campylobacterales; Helicobacteraceae; Sulfurovum; uncultured bacterium
New,CleanUp,ReferenceOTU702015	0	0	0	0	0	0	0	3.92097e-05	0	0	0	0	0	0	Unassigned
New,CleanUp,ReferenceOTU13665	0	0	0	0	0	0	0	3.92097e-05	0	0	0	0	0	0	Unassigned
New,CleanUp,ReferenceOTU54717	0	0	0	0	0	0	0	3.92097e-05	0	0	0	0	0	0	Unassigned
New,CleanUp,ReferenceOTU649168	0	0	0	0	0	0	0	3.92097e-05	0	0	0	0	0	0	Unassigned
New,CleanUp,ReferenceOTU968833	0	0	0	0	0	1.02013e-06	0	2.97994e-05	8.32092e-06	0	0	0	0	0	Bacteria; Proteobacteria; Epsilonproteobacteria; Nautiliales; Nautiliaceae; Nitratifractor
New,CleanUp,ReferenceOTU305622	0	0	0	0	0	1.02013e-05	1.05594e-05	0	1.8306e-05	0	0	0	0	0	Bacteria; Proteobacteria; Epsilonproteobacteria; Campylobacterales; Campylobacteraceae; Arcobacter; uncultured epsilon proteobacterium
New,CleanUp,ReferenceOTU1076332	0	0	0	0	0	6.12077e-06	0	3.29362e-05	0	0	0	0	0	0	Bacteria; Proteobacteria; Epsilonproteobacteria; Campylobacterales; Helicobacteraceae; Sulfurovum; uncultured bacterium
New,CleanUp,ReferenceOTU30164	0	0	0	0	0	0	0	2.66626e-05	4.99255e-06	7.37354e-06	0	0	0	0	Bacteria; Proteobacteria; Epsilonproteobacteria; Campylobacterales; Campylobacteraceae; Thiofractor
New,CleanUp,ReferenceOTU596385	0	0	0	0	0	7.1409e-06	1.31993e-06	2.03891e-05	9.98511e-06	0	0	0	0	0	Bacteria; Proteobacteria; Epsilonproteobacteria; Campylobacterales; Helicobacteraceae; Sulfurovum; uncultured bacterium
New,CleanUp,ReferenceOTU513318	0	0	0	0	0	0	0	0	0	3.87111e-05	0	0	0	0	Bacteria; Aquificae; Aquificae; Aquificales; Desulfurobacteriaceae; Desulfurobacterium
New,CleanUp,ReferenceOTU1097309	0	0	0	0	0	0	0	0	0	3.87111e-05	0	0	0	0	Bacteria; Proteobacteria; Epsilonproteobacteria; Nautiliales; Nautiliaceae; Caminibacter
New,CleanUp,ReferenceOTU338339	0	0	0	0	0	0	0	0	0	3.87111e-05	0	0	0	0	Bacteria; Aquificae; Aquificae; Aquificales; Desulfurobacteriaceae; Desulfurobacterium
New,CleanUp,ReferenceOTU879696	0	0	0	0	0	0	0	0	0	3.87111e-05	0	0	0	0	Bacteria; Aquificae; Aquificae; Aquificales; Desulfurobacteriaceae; Desulfurobacterium
New,CleanUp,ReferenceOTU1118257	0	0	0	0	0	1.53019e-05	1.31993e-06	2.03891e-05	1.66418e-06	0	0	0	0	0	Bacteria; Proteobacteria; Epsilonproteobacteria; Campylobacterales; Helicobacteraceae; Sulfurovum; uncultured epsilon proteobacterium
New,CleanUp,ReferenceOTU1123542	0	0	0	0	0	1.42818e-05	0	9.41033e-06	1.49777e-05	0	0	0	0	0	Bacteria; Proteobacteria; Epsilonproteobacteria; Campylobacterales; Helicobacteraceae; Sulfurimonas; uncultured bacterium
New,CleanUp,ReferenceOTU1076883	0	0	0	0	0	1.02013e-05	1.8479e-05	0	9.98511e-06	0	0	0	0	0	Bacteria; Proteobacteria; Epsilonproteobacteria; Campylobacterales; Campylobacteraceae; Arcobacter; uncultured epsilon proteobacterium
New,CleanUp,ReferenceOTU605263	0	0	0	0	0	1.22415e-05	3.95978e-06	9.41033e-06	0	1.29037e-05	0	0	0	0	Unassigned
New,CleanUp,ReferenceOTU776359	0	0	0	0	0	0	3.95978e-06	3.45046e-05	0	0	0	0	0	0	Unassigned
New,CleanUp,ReferenceOTU742012	0	0	0	0	0	4.08051e-06	2.63985e-05	6.27356e-06	1.66418e-06	0	0	0	0	0	Bacteria; Proteobacteria; Epsilonproteobacteria; Campylobacterales; Helicobacteraceae; Sulfurimonas; uncultured bacterium
New,CleanUp,ReferenceOTU643819	0	0	0	0	0	3.67246e-05	0	0	1.66418e-06	0	0	0	0	0	Bacteria; Proteobacteria; Epsilonproteobacteria; Campylobacterales; Helicobacteraceae; Sulfurovum; uncultured bacterium
New,CleanUp,ReferenceOTU396358	0	0	0	0	0	3.67246e-05	0	1.56839e-06	0	0	0	0	0	0	Bacteria; Proteobacteria; Epsilonproteobacteria; Nautiliales; Nautiliaceae; Caminibacter
New,CleanUp,ReferenceOTU845230	0	0	3.34133e-06	0	0	0	0	0	3.49479e-05	0	0	0	0	0	Bacteria; Aquificae; Aquificae; Aquificales; Desulfurobacteriaceae; Desulfurobacterium
New,CleanUp,ReferenceOTU702620	0	0	0	0	0	0	0	0	3.82762e-05	0	0	0	0	0	Bacteria; Proteobacteria; Epsilonproteobacteria
New,CleanUp,ReferenceOTU146000	0	0	0	0	0	0	1.05594e-05	0	0	2.76508e-05	0	0	0	0	Bacteria; Aquificae; Aquificae; Aquificales; Desulfurobacteriaceae; Desulfurobacterium
New,CleanUp,ReferenceOTU465418	0	0	0	0	0	2.04026e-06	0	3.45046e-05	1.66418e-06	0	0	0	0	0	Bacteria; Proteobacteria; Epsilonproteobacteria; Campylobacterales; Helicobacteraceae; Sulfurimonas; uncultured bacterium
New,CleanUp,ReferenceOTU779847	0	0	0	0	0	1.73422e-05	0	1.41155e-05	6.65674e-06	0	0	0	0	0	Bacteria; Proteobacteria; Epsilonproteobacteria; Nautiliales; Nautiliaceae; Thioreductor
New,CleanUp,ReferenceOTU93467	0	0	0	0	0	3.06038e-06	1.31993e-06	2.03891e-05	1.33135e-05	0	0	0	0	0	Bacteria; Proteobacteria; Epsilonproteobacteria; Campylobacterales; Helicobacteraceae; Sulfurimonas; uncultured bacterium
New,CleanUp,ReferenceOTU478867	0	0	0	0	0	2.14227e-05	0	0	1.66418e-05	0	0	0	0	0	Bacteria; Proteobacteria; Epsilonproteobacteria; Nautiliales; Nautiliaceae; uncultured; uncultured epsilon proteobacterium
New,CleanUp,ReferenceOTU444825	0	0	0	0	0	1.02013e-06	0	2.03891e-05	1.66418e-05	0	0	0	0	0	Bacteria; Proteobacteria; Epsilonproteobacteria; Nautiliales; Nautiliaceae; Thioreductor
New,CleanUp,ReferenceOTU1110029	0	0	0	0	0	1.02013e-05	2.63985e-06	2.35258e-05	1.66418e-06	0	0	0	0	0	Bacteria; Proteobacteria; Epsilonproteobacteria; Campylobacterales; Helicobacteraceae; Sulfurimonas; uncultured bacterium
New,CleanUp,ReferenceOTU693656	0	0	0	0	0	1.93824e-05	1.31993e-06	1.72523e-05	0	0	0	0	0	0	Bacteria; Proteobacteria; Epsilonproteobacteria; Nautiliales; Nautiliaceae; Thioreductor
New,CleanUp,ReferenceOTU211353	0	0	0	0	0	0	1.31993e-06	0	3.66121e-05	0	0	0	0	0	Bacteria; Proteobacteria; Epsilonproteobacteria; Nautiliales; Nautiliaceae
New,CleanUp,ReferenceOTU1099499	0	0	0	0	0	3.1624e-05	0	6.27356e-06	0	0	0	0	0	0	Unassigned
AB293234,1,1316	0	0	0	0	0	2.55032e-05	1.31993e-06	1.09787e-05	0	0	0	0	0	0	Archaea; Euryarchaeota; Thermoplasmata; Thermoplasmatales; Deep Sea Hydrothermal Vent Gp 2(DHVEG-2); uncultured archaeon; uncultured archaeon
New,CleanUp,ReferenceOTU1111623	0	0	0	0	0	0	3.95978e-06	0	2.82911e-05	5.53016e-06	0	0	0	0	Bacteria; Aquificae; Aquificae; Aquificales; Desulfurobacteriaceae; Desulfurobacterium
New,CleanUp,ReferenceOTU576993	0	0	0	0	0	0	0	9.41033e-06	2.82911e-05	0	0	0	0	0	Bacteria; Proteobacteria; Epsilonproteobacteria; Campylobacterales; Campylobacteraceae; Thiofractor; uncultured bacterium
New,CleanUp,ReferenceOTU751462	0	0	0	0	0	0	0	3.76413e-05	0	0	0	0	0	0	Bacteria; Bacteroidetes; VC2,1 Bac22; uncultured bacterium; uncultured bacterium; uncultured bacterium; uncultured bacterium
New,CleanUp,ReferenceOTU194969	0	0	0	0	0	0	0	3.76413e-05	0	0	0	0	0	0	Bacteria; Proteobacteria; Epsilonproteobacteria; Nautiliales; Nautiliaceae; Lebetimonas; epsilon proteobacterium 55YT-9-4
New,CleanUp,ReferenceOTU447959	0	0	0	0	0	0	0	3.76413e-05	0	0	0	0	0	0	Unassigned
New,CleanUp,ReferenceOTU877650	0	0	0	0	0	0	0	3.76413e-05	0	0	0	0	0	0	Bacteria; Acidobacteria; Holophagae; Acanthopleuribacterales; Acanthopleuribacteraceae; Thermotomaculum; uncultured bacterium
New,CleanUp,ReferenceOTU603405	0	0	0	0	0	0	0	3.76413e-05	0	0	0	0	0	0	Unassigned
New,CleanUp,ReferenceOTU202363	0	0	0	0	0	0	0	3.76413e-05	0	0	0	0	0	0	Bacteria; Proteobacteria; Deltaproteobacteria; Desulfurellales; Desulfurellaceae; Hippea; uncultured delta proteobacterium
New,CleanUp,ReferenceOTU930029	0	0	0	0	0	0	0	3.76413e-05	0	0	0	0	0	0	Bacteria; Proteobacteria; Epsilonproteobacteria; Campylobacterales; Helicobacteraceae; Sulfurimonas; uncultured bacterium
New,CleanUp,ReferenceOTU674333	0	0	0	0	0	0	0	3.76413e-05	0	0	0	0	0	0	Bacteria; Caldiserica; Caldisericia; Caldisericales; Caldisericaceae; Caldisericum; uncultured bacterium
New,CleanUp,ReferenceOTU845370	0	0	0	0	0	0	0	3.76413e-05	0	0	0	0	0	0	Unassigned
New,CleanUp,ReferenceOTU177535	0	0	0	0	0	0	0	3.76413e-05	0	0	0	0	0	0	Bacteria; Proteobacteria; Epsilonproteobacteria; Nautiliales; Nautiliaceae
New,ReferenceOTU854	0	0	0	0	0	0	0	1.09787e-05	2.66269e-05	0	0	0	0	0	Bacteria; Proteobacteria; Epsilonproteobacteria; Campylobacterales; Helicobacteraceae; Sulfurimonas; uncultured bacterium
New,CleanUp,ReferenceOTU687909	0	0	0	0	0	0	0	1.09787e-05	2.66269e-05	0	0	0	0	0	Bacteria; Proteobacteria; Epsilonproteobacteria; Campylobacterales; Campylobacteraceae; Sulfurospirillum; uncultured bacterium
New,CleanUp,ReferenceOTU432841	0	0	0	0	0	3.06038e-06	0	3.45046e-05	0	0	0	0	0	0	Bacteria
New,CleanUp,ReferenceOTU826773	0	0	0	0	0	2.95837e-05	0	7.84194e-06	0	0	0	0	0	0	Bacteria; Proteobacteria; Deltaproteobacteria; Bdellovibrionales; Bacteriovoracaceae; HotSeep-1; uncultured bacterium
New,ReferenceOTU1649	0	0	0	0	0	2.95837e-05	0	7.84194e-06	0	0	0	0	0	0	Bacteria; Proteobacteria; Epsilonproteobacteria; Campylobacterales; Helicobacteraceae; Sulfurovum
New,CleanUp,ReferenceOTU1056304	0	0	0	0	0	1.63221e-05	5.27971e-06	1.56839e-05	0	0	0	0	0	0	Bacteria; Proteobacteria; Epsilonproteobacteria; Campylobacterales; Helicobacteraceae; Sulfurimonas; uncultured bacterium
New,CleanUp,ReferenceOTU1105373	0	0	0	0	0	4.08051e-06	0	0	0	3.31809e-05	0	0	0	0	Unassigned
New,CleanUp,ReferenceOTU602764	0	0	0	0	0	1.53019e-05	0	2.19574e-05	0	0	0	0	0	0	Bacteria; Aquificae; Aquificae; Aquificales; Desulfurobacteriaceae; Thermovibrio
New,CleanUp,ReferenceOTU715714	0	0	0	0	0	2.95837e-05	1.31993e-06	6.27356e-06	0	0	0	0	0	0	Bacteria; Proteobacteria; Epsilonproteobacteria; Campylobacterales; Helicobacteraceae; Sulfurovum; uncultured bacterium
New,CleanUp,ReferenceOTU1033302	0	0	0	0	0	0	0	0	3.16195e-05	5.53016e-06	0	0	0	0	Archaea; Euryarchaeota; Archaeoglobi; Archaeoglobales; Archaeoglobaceae; Archaeoglobus
New,CleanUp,ReferenceOTU611861	0	0	0	0	0	4.08051e-06	0	3.13678e-05	1.66418e-06	0	0	0	0	0	Unassigned
New,CleanUp,ReferenceOTU543815	0	0	0	0	0	1.02013e-06	0	3.60729e-05	0	0	0	0	0	0	Bacteria; Proteobacteria; Epsilonproteobacteria; Campylobacterales; Helicobacteraceae; Sulfurimonas; uncultured bacterium
New,ReferenceOTU1016	0	0	0	0	0	1.02013e-06	0	3.60729e-05	0	0	0	0	0	0	Bacteria; Proteobacteria; Deltaproteobacteria; Desulfobacterales; Desulfobulbaceae; Desulfobulbus; uncultured bacterium
New,CleanUp,ReferenceOTU525390	0	0	0	0	0	4.08051e-06	0	3.29362e-05	0	0	0	0	0	0	Bacteria; Proteobacteria; Epsilonproteobacteria; Nautiliales; Nautiliaceae; Lebetimonas
New,CleanUp,ReferenceOTU849190	0	0	0	0	0	3.36642e-05	0	0	3.32837e-06	0	0	0	0	0	Bacteria; Proteobacteria; Epsilonproteobacteria; Campylobacterales; Campylobacteraceae; Arcobacter; uncultured epsilon proteobacterium
New,CleanUp,ReferenceOTU191776	0	0	0	0	0	2.24428e-05	0	7.84194e-06	6.65674e-06	0	0	0	0	0	Bacteria; Proteobacteria; Epsilonproteobacteria; Nautiliales; Nautiliaceae; Thioreductor
New,CleanUp,ReferenceOTU835229	0	0	0	0	0	1.32617e-05	0	0	1.99702e-05	3.68677e-06	0	0	0	0	Bacteria; Proteobacteria; Epsilonproteobacteria; Nautiliales; Nautiliaceae
JF180570,1,1361	0	0	0	0	0	0	0	0	0	3.68677e-05	0	0	0	0	Bacteria; Actinobacteria; Actinobacteria; Actinomycetales; Actinomycetaceae; Actinomyces
KC001222,1,1314	0	0	0	0	0	0	0	0	0	3.68677e-05	0	0	0	0	Bacteria; Firmicutes; Bacilli; Lactobacillales; Carnobacteriaceae; Granulicatella
New,CleanUp,ReferenceOTU28526	0	0	0	0	0	0	0	0	0	3.68677e-05	0	0	0	0	Bacteria; Thermodesulfobacteria; Thermodesulfobacteria; Thermodesulfobacteriales; Thermodesulfobacteriaceae; Thermodesulfatator
New,CleanUp,ReferenceOTU72913	0	0	0	0	0	0	0	0	0	3.68677e-05	0	0	0	0	Bacteria; Proteobacteria; Epsilonproteobacteria; Nautiliales; Nautiliaceae; Nitratifractor; uncultured bacterium
AJ504424,1,1380	0	0	0	0	0	0	0	0	0	3.68677e-05	0	0	0	0	Bacteria; Actinobacteria; Actinobacteria; Corynebacteriales; Corynebacteriaceae; Corynebacterium; uncultured bacterium
New,ReferenceOTU535	0	0	2.45031e-05	0	0	9.18115e-06	1.31993e-06	0	0	1.84339e-06	0	0	0	0	Bacteria; Proteobacteria; Alphaproteobacteria; SAR11 clade; Deep 1; uncultured bacterium; uncultured bacterium
New,CleanUp,ReferenceOTU965656	0	0	0	0	0	3.36642e-05	0	3.13678e-06	0	0	0	0	0	0	Bacteria; Proteobacteria; Epsilonproteobacteria; Campylobacterales; Helicobacteraceae; Sulfurovum; uncultured epsilon proteobacterium
New,CleanUp,ReferenceOTU795287	0	0	0	0	0	2.04026e-06	0	3.13678e-05	3.32837e-06	0	0	0	0	0	Unassigned
New,CleanUp,ReferenceOTU590138	0	1.58255e-06	0	0	0	2.04026e-06	1.58391e-05	1.72523e-05	0	0	0	0	0	0	Bacteria; Bacteroidetes; SB-1; uncultured bacterium; uncultured bacterium; uncultured bacterium; uncultured bacterium
New,CleanUp,ReferenceOTU55446	0	0	0	0	0	1.83623e-05	2.63985e-06	1.56839e-05	0	0	0	0	0	0	Bacteria; Proteobacteria; Epsilonproteobacteria; Campylobacterales; Helicobacteraceae; Sulfurovum; uncultured bacterium
New,CleanUp,ReferenceOTU903386	0	0	0	0	0	3.36642e-05	1.31993e-06	0	1.66418e-06	0	0	0	0	0	Bacteria; Proteobacteria; Epsilonproteobacteria; Nautiliales; Nautiliaceae; Caminibacter; uncultured bacterium
New,CleanUp,ReferenceOTU671077	0	0	0	0	0	2.04026e-06	0	3.29362e-05	1.66418e-06	0	0	0	0	0	Bacteria; Proteobacteria; Epsilonproteobacteria; Campylobacterales; Helicobacteraceae; Sulfurimonas; uncultured bacterium
New,CleanUp,ReferenceOTU5068	0	0	0	0	0	0	0	0	3.66121e-05	0	0	0	0	0	Archaea; Euryarchaeota; Archaeoglobi; Archaeoglobales; Archaeoglobaceae; uncultured; uncultured archaeon
New,CleanUp,ReferenceOTU404712	0	0	0	0	0	0	0	0	3.66121e-05	0	0	0	0	0	Unassigned
New,CleanUp,ReferenceOTU971059	0	0	0	0	0	0	1.31993e-06	2.19574e-05	1.33135e-05	0	0	0	0	0	Bacteria; Proteobacteria; Deltaproteobacteria; Desulfurellales; Desulfurellaceae; Hippea
JN662282,1,1401	0	0	0	0	0	3.36642e-05	1.31993e-06	1.56839e-06	0	0	0	0	0	0	Bacteria; Proteobacteria; Epsilonproteobacteria; Campylobacterales; Campylobacteraceae; Campylobacter; uncultured epsilon proteobacterium
New,CleanUp,ReferenceOTU433649	0	0	0	0	0	0	0	1.56839e-06	3.49479e-05	0	0	0	0	0	Bacteria; Proteobacteria; Epsilonproteobacteria; Campylobacterales
New,CleanUp,ReferenceOTU119656	0	0	0	0	0	0	0	1.56839e-06	3.49479e-05	0	0	0	0	0	Bacteria; Proteobacteria; Epsilonproteobacteria; Campylobacterales; Helicobacteraceae; Sulfurimonas
New,CleanUp,ReferenceOTU960370	0	0	1.11378e-06	0	0	3.06038e-05	0	4.70517e-06	0	0	0	0	0	0	Bacteria; Proteobacteria; Epsilonproteobacteria; Campylobacterales; Helicobacteraceae; Sulfurovum; uncultured bacterium
New,CleanUp,ReferenceOTU90338	0	0	0	0	0	3.46844e-05	0	0	1.66418e-06	0	0	0	0	0	Bacteria; Proteobacteria; Epsilonproteobacteria; Nautiliales; Nautiliaceae; Caminibacter; uncultured bacterium
New,CleanUp,ReferenceOTU680532	0	0	1.11378e-06	0	0	3.36642e-05	0	1.56839e-06	0	0	0	0	0	0	Bacteria; Proteobacteria; Epsilonproteobacteria; Campylobacterales; Campylobacteraceae; Arcobacter
New,CleanUp,ReferenceOTU930342	0	0	0	0	0	0	1.31993e-06	0	0	3.50243e-05	0	0	0	0	Bacteria; Proteobacteria; Deltaproteobacteria; Desulfobacterales; Desulfobacteraceae
New,CleanUp,ReferenceOTU538249	0	0	0	0	0	3.1624e-05	0	4.70517e-06	0	0	0	0	0	0	Bacteria; Proteobacteria; Epsilonproteobacteria; Campylobacterales; Helicobacteraceae; Sulfurimonas; uncultured bacterium
New,CleanUp,ReferenceOTU499509	0	0	0	0	0	0	0	4.70517e-06	3.16195e-05	0	0	0	0	0	Bacteria; Proteobacteria; Epsilonproteobacteria; Campylobacterales; Campylobacteraceae; Sulfurospirillum; uncultured bacterium
New,CleanUp,ReferenceOTU692120	0	0	0	0	0	1.12214e-05	0	2.50942e-05	0	0	0	0	0	0	Bacteria; Proteobacteria; Epsilonproteobacteria; Nautiliales; Nautiliaceae; Nitratifractor
New,CleanUp,ReferenceOTU160326	0	0	0	0	0	0	0	3.29362e-05	3.32837e-06	0	0	0	0	0	Unassigned
New,CleanUp,ReferenceOTU1053139	0	0	0	0	0	1.02013e-06	1.31993e-06	1.88207e-05	1.49777e-05	0	0	0	0	0	Bacteria; BD1-5; uncultured bacterium; uncultured bacterium; uncultured bacterium; uncultured bacterium; uncultured bacterium
New,CleanUp,ReferenceOTU417078	0	0	0	0	0	0	0	3.60729e-05	0	0	0	0	0	0	Unassigned
New,CleanUp,ReferenceOTU993243	0	0	0	0	0	0	0	3.60729e-05	0	0	0	0	0	0	Bacteria; Proteobacteria; Deltaproteobacteria; Desulfurellales; Desulfurellaceae; Hippea; uncultured delta proteobacterium
New,CleanUp,ReferenceOTU10772	0	0	0	0	0	0	0	3.60729e-05	0	0	0	0	0	0	Bacteria; Acidobacteria; Holophagae; Acanthopleuribacterales; Acanthopleuribacteraceae; Thermotomaculum; uncultured bacterium
New,CleanUp,ReferenceOTU410731	0	0	0	0	0	0	0	3.60729e-05	0	0	0	0	0	0	Bacteria; Proteobacteria; Deltaproteobacteria; Desulfurellales; Desulfurellaceae; Hippea; uncultured delta proteobacterium
New,CleanUp,ReferenceOTU1014621	0	0	0	0	0	0	0	3.60729e-05	0	0	0	0	0	0	Unassigned
New,CleanUp,ReferenceOTU742700	0	0	0	0	0	0	0	3.60729e-05	0	0	0	0	0	0	Bacteria; Proteobacteria; Deltaproteobacteria; Desulfobacterales; Desulfobulbaceae; Desulfobulbus; uncultured delta proteobacterium
EF532910,1,1588	0	1.58255e-06	2.22755e-06	0	0	8.16103e-06	0	0	0	2.3964e-05	0	0	0	0	Bacteria; Proteobacteria; Gammaproteobacteria; Pseudomonadales; Moraxellaceae; Acinetobacter; uncultured bacterium
New,CleanUp,ReferenceOTU54719	0	0	0	0	0	3.06038e-06	0	1.25471e-05	0	2.02772e-05	0	0	0	0	Bacteria; Proteobacteria; Deltaproteobacteria; Desulfobacterales; Desulfobulbaceae; Desulfobulbus; uncultured bacterium
New,CleanUp,ReferenceOTU1131056	0	0	0	0	0	0	2.63985e-06	0	0	3.31809e-05	0	0	0	0	Bacteria; Aquificae; Aquificae; Aquificales; Desulfurobacteriaceae; Desulfurobacterium
New,CleanUp,ReferenceOTU350944	0	0	0	0	0	3.26441e-05	0	3.13678e-06	0	0	0	0	0	0	Bacteria; Proteobacteria; Epsilonproteobacteria; Campylobacterales; Helicobacteraceae; Sulfurovum; uncultured epsilon proteobacterium
New,CleanUp,ReferenceOTU302472	0	0	0	0	0	7.1409e-06	0	9.41033e-06	9.98511e-06	9.21693e-06	0	0	0	0	Bacteria; BD1-5; uncultured bacterium; uncultured bacterium; uncultured bacterium; uncultured bacterium; uncultured bacterium
New,CleanUp,ReferenceOTU1021507	0	0	0	0	0	3.06038e-06	1.31993e-06	3.13678e-05	0	0	0	0	0	0	Bacteria; Proteobacteria; Epsilonproteobacteria; Campylobacterales; Helicobacteraceae; Sulfurimonas; uncultured epsilon proteobacterium
New,CleanUp,ReferenceOTU313630	0	0	0	0	0	4.08051e-06	0	2.66626e-05	4.99255e-06	0	0	0	0	0	Bacteria; Proteobacteria; Epsilonproteobacteria; Campylobacterales; Helicobacteraceae; Sulfurimonas
New,CleanUp,ReferenceOTU895668	0	0	0	0	0	4.08051e-06	0	9.41033e-06	0	2.21206e-05	0	0	0	0	Bacteria; BHI80-139
New,CleanUp,ReferenceOTU899430	0	0	1.11378e-06	0	0	6.12077e-06	2.50786e-05	3.13678e-06	0	0	0	0	0	0	Bacteria; Proteobacteria; Epsilonproteobacteria; Campylobacterales; Helicobacteraceae; Sulfurimonas; uncultured bacterium
New,CleanUp,ReferenceOTU357058	0	0	0	0	0	2.24428e-05	0	6.27356e-06	6.65674e-06	0	0	0	0	0	Bacteria; Proteobacteria; Epsilonproteobacteria; Nautiliales; Nautiliaceae
New,CleanUp,ReferenceOTU188999	0	0	0	0	0	7.1409e-06	0	2.8231e-05	0	0	0	0	0	0	Bacteria; Proteobacteria; Epsilonproteobacteria; Campylobacterales; Helicobacteraceae; Sulfurovum; uncultured epsilon proteobacterium
New,CleanUp,ReferenceOTU925824	0	0	0	0	0	3.36642e-05	0	1.56839e-06	0	0	0	0	0	0	Bacteria; Proteobacteria; Epsilonproteobacteria; Campylobacterales; Helicobacteraceae; Sulfurimonas
New,CleanUp,ReferenceOTU17776	0	0	0	0	0	1.53019e-05	2.63985e-06	1.72523e-05	0	0	0	0	0	0	Bacteria; Proteobacteria; Epsilonproteobacteria; Campylobacterales; Helicobacteraceae; Sulfurovum; uncultured epsilon proteobacterium
New,CleanUp,ReferenceOTU562873	0	0	0	0	0	7.1409e-06	1.97989e-05	1.56839e-06	6.65674e-06	0	0	0	0	0	Unassigned
New,CleanUp,ReferenceOTU1090722	0	0	0	0	0	9.18115e-06	1.45192e-05	3.13678e-06	8.32092e-06	0	0	0	0	0	Bacteria; Proteobacteria; Epsilonproteobacteria; Campylobacterales; Helicobacteraceae; Sulfurovum; uncultured epsilon proteobacterium
New,CleanUp,ReferenceOTU217627	0	0	0	0	0	1.32617e-05	1.45192e-05	0	0	7.37354e-06	0	0	0	0	Bacteria; Chloroflexi; Anaerolineae; Anaerolineales; Anaerolineaceae; uncultured; uncultured Chloroflexi bacterium
New,CleanUp,ReferenceOTU94317	0	0	0	0	0	5.10064e-06	0	2.66626e-05	3.32837e-06	0	0	0	0	0	Bacteria; Proteobacteria; Epsilonproteobacteria; Nautiliales; Nautiliaceae; Thioreductor
JQ611082,1,933	0	0	0	0	0	0	0	0	0	3.50243e-05	0	0	0	0	Archaea; Crenarchaeota; Thermoprotei; Desulfurococcales; Desulfurococcaceae; uncultured; uncultured archaeon
New,CleanUp,ReferenceOTU1101044	0	0	0	0	0	0	0	0	0	3.50243e-05	0	0	0	0	Bacteria; Proteobacteria; Epsilonproteobacteria; Nautiliales; Nautiliaceae; Nitratifractor; uncultured bacterium
New,CleanUp,ReferenceOTU986021	0	0	0	0	0	0	0	0	0	3.50243e-05	0	0	0	0	Bacteria; Aquificae; Aquificae; Aquificales; Desulfurobacteriaceae; Desulfurobacterium
New,CleanUp,ReferenceOTU78630	0	0	0	0	0	0	0	0	0	3.50243e-05	0	0	0	0	Bacteria; Aquificae; Aquificae; Aquificales; Desulfurobacteriaceae; Desulfurobacterium
New,CleanUp,ReferenceOTU58626	0	0	0	0	0	0	0	0	0	3.50243e-05	0	0	0	0	Bacteria; Proteobacteria; Epsilonproteobacteria; Nautiliales; Nautiliaceae; Nitratifractor; uncultured bacterium
New,CleanUp,ReferenceOTU937830	0	0	0	0	0	0	0	0	0	3.50243e-05	0	0	0	0	Bacteria; Proteobacteria; Epsilonproteobacteria; Nautiliales; Nautiliaceae; Nitratifractor; uncultured bacterium
New,CleanUp,ReferenceOTU614358	0	0	0	0	0	0	0	0	0	3.50243e-05	0	0	0	0	Bacteria; Proteobacteria; Epsilonproteobacteria; Nautiliales; Nautiliaceae; Nitratifractor; uncultured bacterium
New,CleanUp,ReferenceOTU1072021	0	0	0	0	0	1.02013e-06	2.77185e-05	6.27356e-06	0	0	0	0	0	0	Bacteria; Bacteroidetes; Sphingobacteriia; Sphingobacteriales; WCHB1-69
New,CleanUp,ReferenceOTU107045	0	0	0	0	0	3.06038e-06	3.03583e-05	1.56839e-06	0	0	0	0	0	0	Unassigned
New,CleanUp,ReferenceOTU1026809	0	0	0	0	0	2.34629e-05	6.59963e-06	1.56839e-06	3.32837e-06	0	0	0	0	0	Bacteria; Proteobacteria; Epsilonproteobacteria; Nautiliales; Nautiliaceae; Caminibacter
New,CleanUp,ReferenceOTU402595	0	0	0	0	0	0	0	0	3.49479e-05	0	0	0	0	0	Unassigned
New,CleanUp,ReferenceOTU1130153	0	0	0	0	0	0	0	0	3.49479e-05	0	0	0	0	0	Bacteria; Proteobacteria; Epsilonproteobacteria; Campylobacterales; Helicobacteraceae; Sulfurovum
New,ReferenceOTU209	0	0	0	0	0	0	0	1.56839e-06	3.32837e-05	0	0	0	0	0	Bacteria; Proteobacteria; Epsilonproteobacteria; Campylobacterales; Helicobacteraceae; Sulfurimonas; uncultured bacterium
New,CleanUp,ReferenceOTU598841	0	0	0	0	0	0	0	1.56839e-06	3.32837e-05	0	0	0	0	0	Bacteria; Proteobacteria; Epsilonproteobacteria; Nautiliales; Nautiliaceae; Nitratifractor; uncultured bacterium
New,CleanUp,ReferenceOTU1095321	0	0	0	0	0	2.85636e-05	0	6.27356e-06	0	0	0	0	0	0	Bacteria; Proteobacteria; Epsilonproteobacteria; Campylobacterales; Campylobacteraceae; Arcobacter; uncultured bacterium
New,CleanUp,ReferenceOTU955765	0	0	0	0	0	6.12077e-06	0	2.35258e-05	3.32837e-06	1.84339e-06	0	0	0	0	Bacteria; BHI80-139
New,CleanUp,ReferenceOTU920253	0	0	0	0	0	1.12214e-05	0	2.35258e-05	0	0	0	0	0	0	Bacteria; Bacteroidetes; VC2,1 Bac22; uncultured bacterium; uncultured bacterium; uncultured bacterium; uncultured bacterium
New,ReferenceOTU1537	0	0	0	0	0	2.24428e-05	1.31993e-06	1.09787e-05	0	0	0	0	0	0	Bacteria; Proteobacteria; Epsilonproteobacteria; Campylobacterales; Helicobacteraceae; Sulfurovum; uncultured bacterium
New,CleanUp,ReferenceOTU863345	0	0	0	0	0	1.42818e-05	0	2.03891e-05	0	0	0	0	0	0	Bacteria; Proteobacteria; Epsilonproteobacteria; Campylobacterales; Helicobacteraceae; Sulfurovum; uncultured epsilon proteobacterium
New,CleanUp,ReferenceOTU840418	0	0	0	0	0	3.1624e-05	1.31993e-06	0	1.66418e-06	0	0	0	0	0	Bacteria; Proteobacteria; Epsilonproteobacteria; Campylobacterales; Helicobacteraceae; Sulfurovum
New,CleanUp,ReferenceOTU518774	0	0	0	0	0	4.08051e-06	0	1.88207e-05	1.16493e-05	0	0	0	0	0	Bacteria; Proteobacteria; Epsilonproteobacteria; Nautiliales; Nautiliaceae
New,CleanUp,ReferenceOTU58071	0	0	0	0	0	3.1624e-05	1.31993e-06	1.56839e-06	0	0	0	0	0	0	Bacteria; Proteobacteria; Epsilonproteobacteria; Nautiliales; Nautiliaceae; Caminibacter
New,CleanUp,ReferenceOTU358143	0	0	0	0	0	0	0	3.45046e-05	0	0	0	0	0	0	Bacteria; Proteobacteria; Epsilonproteobacteria; Campylobacterales; Helicobacteraceae; Sulfurovum; uncultured epsilon proteobacterium
New,CleanUp,ReferenceOTU592294	0	0	0	0	0	0	0	3.45046e-05	0	0	0	0	0	0	Bacteria; Proteobacteria; Epsilonproteobacteria; Campylobacterales; Helicobacteraceae; Sulfurimonas; uncultured bacterium
New,CleanUp,ReferenceOTU796524	0	0	0	0	0	0	0	3.45046e-05	0	0	0	0	0	0	Bacteria; Acidobacteria; Holophagae; Acanthopleuribacterales; Acanthopleuribacteraceae; Thermotomaculum; uncultured bacterium
New,CleanUp,ReferenceOTU864557	0	0	0	0	0	0	0	3.45046e-05	0	0	0	0	0	0	Bacteria; Proteobacteria; Epsilonproteobacteria; Nautiliales; Nautiliaceae; Nitratifractor
New,CleanUp,ReferenceOTU164157	0	0	0	0	0	0	0	3.45046e-05	0	0	0	0	0	0	Unassigned
New,CleanUp,ReferenceOTU102874	0	0	0	0	0	0	0	3.45046e-05	0	0	0	0	0	0	Unassigned
New,CleanUp,ReferenceOTU395674	0	0	0	0	0	0	0	3.45046e-05	0	0	0	0	0	0	Bacteria; Acidobacteria; Holophagae; Acanthopleuribacterales; Acanthopleuribacteraceae; Thermotomaculum; uncultured bacterium
New,CleanUp,ReferenceOTU323634	0	0	0	0	0	0	0	3.45046e-05	0	0	0	0	0	0	Unassigned
New,CleanUp,ReferenceOTU105294	0	0	0	0	0	0	0	3.45046e-05	0	0	0	0	0	0	Bacteria; Proteobacteria; Epsilonproteobacteria; Campylobacterales; Helicobacteraceae
New,CleanUp,ReferenceOTU732861	0	0	0	0	0	0	1.31993e-06	0	0	3.31809e-05	0	0	0	0	Unassigned
New,CleanUp,ReferenceOTU652626	0	0	0	0	0	1.63221e-05	0	1.56839e-06	0	1.65905e-05	0	0	0	0	Bacteria; Proteobacteria; Epsilonproteobacteria; Nautiliales; Nautiliaceae; Caminibacter; uncultured bacterium
New,CleanUp,ReferenceOTU765640	0	0	0	0	0	2.95837e-05	0	1.56839e-06	3.32837e-06	0	0	0	0	0	Bacteria; Aquificae; Aquificae; Aquificales; Desulfurobacteriaceae
New,CleanUp,ReferenceOTU38293	0	0	0	0	0	1.22415e-05	9.23948e-06	7.84194e-06	4.99255e-06	0	0	0	0	0	Unassigned
New,CleanUp,ReferenceOTU690549	0	0	0	0	0	2.95837e-05	0	4.70517e-06	0	0	0	0	0	0	Bacteria; Proteobacteria; Epsilonproteobacteria; Nautiliales; Nautiliaceae
New,CleanUp,ReferenceOTU110968	0	0	0	0	0	0	6.59963e-06	0	0	2.76508e-05	0	0	0	0	Bacteria; Aquificae; Aquificae; Aquificales; Desulfurobacteriaceae; Desulfurobacterium
New,CleanUp,ReferenceOTU1113688	0	0	0	0	0	3.26441e-05	0	1.56839e-06	0	0	0	0	0	0	Bacteria; Proteobacteria; Epsilonproteobacteria; Nautiliales; Nautiliaceae; Caminibacter; uncultured bacterium
New,CleanUp,ReferenceOTU946719	0	0	0	0	0	3.26441e-05	0	1.56839e-06	0	0	0	0	0	0	Bacteria; Proteobacteria; Epsilonproteobacteria; Campylobacterales; Helicobacteraceae; Sulfurovum; uncultured bacterium
New,CleanUp,ReferenceOTU1046153	0	0	0	0	0	2.55032e-05	3.95978e-06	4.70517e-06	0	0	0	0	0	0	Bacteria; Proteobacteria; Epsilonproteobacteria; Campylobacterales; Helicobacteraceae; Sulfurimonas; uncultured bacterium
New,CleanUp,ReferenceOTU61340	0	0	1.0024e-05	0	0	1.83623e-05	2.63985e-06	3.13678e-06	0	0	0	0	0	0	Bacteria; Firmicutes; Clostridia; Clostridiales; Family XII; Fusibacter; uncultured bacterium
New,CleanUp,ReferenceOTU121819	0	0	0	0	0	1.02013e-06	0	3.13678e-06	2.99553e-05	0	0	0	0	0	Bacteria; Proteobacteria; Epsilonproteobacteria; Campylobacterales; Helicobacteraceae; Sulfurimonas; uncultured bacterium
New,CleanUp,ReferenceOTU447850	0	0	0	0	0	1.02013e-06	0	4.70517e-06	2.82911e-05	0	0	0	0	0	Bacteria; Proteobacteria; Epsilonproteobacteria; Campylobacterales; Helicobacteraceae; Sulfurovum; uncultured bacterium
New,CleanUp,ReferenceOTU360437	0	0	0	0	0	2.75435e-05	0	3.13678e-06	3.32837e-06	0	0	0	0	0	Bacteria; Proteobacteria; Epsilonproteobacteria; Nautiliales; Nautiliaceae
AF367485,1,1271	0	0	0	0	0	2.04026e-06	3.95978e-06	4.70517e-06	2.32986e-05	0	0	0	0	0	Bacteria; BD1-5; uncultured epsilon proteobacterium; uncultured epsilon proteobacterium; uncultured epsilon proteobacterium; uncultured epsilon proteobacterium; uncultured epsilon proteobacterium
New,CleanUp,ReferenceOTU557657	0	0	0	0	0	9.18115e-06	1.8479e-05	6.27356e-06	0	0	0	0	0	0	Unassigned
New,CleanUp,ReferenceOTU670656	0	0	0	0	0	2.44831e-05	0	9.41033e-06	0	0	0	0	0	0	Bacteria; Proteobacteria; Epsilonproteobacteria; Campylobacterales; Helicobacteraceae; Sulfurovum; uncultured bacterium
New,CleanUp,ReferenceOTU766405	0	0	0	0	0	4.08051e-06	0	2.97994e-05	0	0	0	0	0	0	Bacteria; Proteobacteria; Epsilonproteobacteria; Nautiliales; Nautiliaceae; Caminibacter; uncultured bacterium
New,CleanUp,ReferenceOTU261507	0	0	0	0	0	1.02013e-06	5.27971e-06	1.25471e-05	1.49777e-05	0	0	0	0	0	Bacteria; Proteobacteria; Epsilonproteobacteria; Campylobacterales; Helicobacteraceae; Sulfurovum; uncultured bacterium
New,CleanUp,ReferenceOTU1038697	0	0	0	0	0	6.12077e-06	1.97989e-05	7.84194e-06	0	0	0	0	0	0	Bacteria; Proteobacteria; Epsilonproteobacteria; Campylobacterales; Helicobacteraceae; Sulfurovum
New,CleanUp,ReferenceOTU508423	0	0	0	0	0	0	7.91956e-06	0	0	2.58074e-05	0	0	0	0	Bacteria; Proteobacteria; Deltaproteobacteria; Desulfovibrionales; Desulfohalobiaceae
New,CleanUp,ReferenceOTU647908	0	0	0	0	0	0	0	2.03891e-05	1.33135e-05	0	0	0	0	0	Bacteria; Proteobacteria; Epsilonproteobacteria; Campylobacterales; Helicobacteraceae; Sulfurovum; uncultured epsilon proteobacterium
New,CleanUp,ReferenceOTU282630	0	0	0	0	0	1.32617e-05	0	2.03891e-05	0	0	0	0	0	0	Bacteria; Proteobacteria; Epsilonproteobacteria; Campylobacterales; Helicobacteraceae; Sulfurovum; uncultured epsilon proteobacterium
New,CleanUp,ReferenceOTU693793	0	0	0	0	0	5.10064e-06	2.50786e-05	1.56839e-06	1.66418e-06	0	0	0	0	0	Bacteria; Proteobacteria; Epsilonproteobacteria; Campylobacterales; Helicobacteraceae; Sulfurimonas; uncultured bacterium
New,CleanUp,ReferenceOTU965025	0	0	0	0	0	2.04026e-06	0	3.13678e-05	0	0	0	0	0	0	Bacteria; Proteobacteria; Epsilonproteobacteria; Nautiliales; Nautiliaceae; Thioreductor
New,CleanUp,ReferenceOTU77610	0	0	0	0	0	1.12214e-05	1.7159e-05	0	4.99255e-06	0	0	0	0	0	Bacteria; Proteobacteria; Epsilonproteobacteria; Campylobacterales; Helicobacteraceae; Sulfurovum; uncultured bacterium
New,CleanUp,ReferenceOTU99397	0	0	0	0	0	1.02013e-06	0	1.56839e-05	1.66418e-05	0	0	0	0	0	Unassigned
New,CleanUp,ReferenceOTU380026	0	0	0	0	0	0	0	0	3.32837e-05	0	0	0	0	0	Bacteria; Proteobacteria; Epsilonproteobacteria; Nautiliales; Nautiliaceae; uncultured; uncultured bacterium
New,CleanUp,ReferenceOTU741564	0	0	0	0	0	0	0	0	0	3.31809e-05	0	0	0	0	Bacteria; Proteobacteria; Epsilonproteobacteria; Nautiliales; Nautiliaceae; Lebetimonas; uncultured bacterium
New,ReferenceOTU2135	0	0	0	0	0	0	0	0	0	3.31809e-05	0	0	0	0	Bacteria; Proteobacteria; Deltaproteobacteria; Desulfobacterales; Desulfobulbaceae; Desulfobulbus
New,CleanUp,ReferenceOTU433990	0	0	0	0	0	0	0	0	0	3.31809e-05	0	0	0	0	Bacteria; Proteobacteria; Epsilonproteobacteria; Nautiliales; Nautiliaceae; Nitratifractor; uncultured bacterium
New,CleanUp,ReferenceOTU136111	0	0	0	0	0	0	0	3.13678e-05	1.66418e-06	0	0	0	0	0	Bacteria; Proteobacteria; Epsilonproteobacteria; Nautiliales; Nautiliaceae; Nitratifractor; uncultured epsilon proteobacterium
New,CleanUp,ReferenceOTU693075	0	0	0	0	0	2.24428e-05	2.63985e-06	6.27356e-06	1.66418e-06	0	0	0	0	0	Bacteria; Proteobacteria; Epsilonproteobacteria; Campylobacterales; Campylobacteraceae; Arcobacter; uncultured epsilon proteobacterium
New,CleanUp,ReferenceOTU43232	0	0	1.11378e-06	0	0	7.1409e-06	1.97989e-05	1.56839e-06	3.32837e-06	0	0	0	0	0	Bacteria; BD1-5; uncultured prokaryote; uncultured prokaryote; uncultured prokaryote; uncultured prokaryote; uncultured prokaryote
New,CleanUp,ReferenceOTU751505	0	0	0	0	0	0	0	3.29362e-05	0	0	0	0	0	0	Unassigned
New,CleanUp,ReferenceOTU657670	0	0	0	0	0	0	0	3.29362e-05	0	0	0	0	0	0	Unassigned
New,CleanUp,ReferenceOTU554100	0	0	0	0	0	0	0	3.29362e-05	0	0	0	0	0	0	Bacteria; Proteobacteria; Epsilonproteobacteria; Campylobacterales; Helicobacteraceae; Sulfurovum; uncultured bacterium
New,CleanUp,ReferenceOTU211118	0	0	0	0	0	0	0	3.29362e-05	0	0	0	0	0	0	Bacteria; Proteobacteria; Epsilonproteobacteria; Campylobacterales; Helicobacteraceae; Sulfurimonas; uncultured bacterium
New,ReferenceOTU2175	0	0	0	0	0	0	0	3.29362e-05	0	0	0	0	0	0	Unassigned
New,CleanUp,ReferenceOTU924165	0	0	0	0	0	0	0	3.29362e-05	0	0	0	0	0	0	Bacteria; Proteobacteria; Deltaproteobacteria; Desulfurellales; Desulfurellaceae; Hippea; uncultured delta proteobacterium
New,CleanUp,ReferenceOTU897969	0	0	0	0	0	0	0	3.29362e-05	0	0	0	0	0	0	Bacteria; Proteobacteria; Epsilonproteobacteria; Campylobacterales; Helicobacteraceae; Sulfurimonas; uncultured bacterium
New,CleanUp,ReferenceOTU1030487	0	0	0	0	0	0	0	3.29362e-05	0	0	0	0	0	0	Bacteria; Proteobacteria; Deltaproteobacteria; Desulfurellales; Desulfurellaceae; Hippea; uncultured delta proteobacterium
New,CleanUp,ReferenceOTU121041	0	0	0	0	0	3.06038e-06	0	2.97994e-05	0	0	0	0	0	0	Bacteria; Proteobacteria; Epsilonproteobacteria; Campylobacterales; Helicobacteraceae; Sulfurovum; uncultured epsilon proteobacterium
New,CleanUp,ReferenceOTU561128	0	0	0	0	0	6.12077e-06	0	2.66626e-05	0	0	0	0	0	0	Bacteria; Proteobacteria; Epsilonproteobacteria; Campylobacterales; Helicobacteraceae; Sulfurimonas; uncultured bacterium
New,CleanUp,ReferenceOTU313380	0	0	0	0	0	0	0	9.41033e-06	2.32986e-05	0	0	0	0	0	Bacteria; Proteobacteria; Epsilonproteobacteria; Campylobacterales; Helicobacteraceae; Sulfurimonas; uncultured bacterium
New,CleanUp,ReferenceOTU691816	0	0	0	0	0	1.22415e-05	7.91956e-06	1.25471e-05	0	0	0	0	0	0	Unassigned
New,CleanUp,ReferenceOTU500037	0	0	0	0	0	9.18115e-06	0	2.35258e-05	0	0	0	0	0	0	Unassigned
New,CleanUp,ReferenceOTU121177	0	0	0	0	0	0	1.31993e-06	3.13678e-05	0	0	0	0	0	0	Bacteria; Proteobacteria; Epsilonproteobacteria; Campylobacterales; Helicobacteraceae; Sulfurimonas; uncultured bacterium
New,CleanUp,ReferenceOTU104244	0	0	0	0	0	3.06038e-06	1.31993e-06	2.8231e-05	0	0	0	0	0	0	Bacteria; Proteobacteria; Epsilonproteobacteria; Nautiliales; Nautiliaceae; Nitratifractor
New,CleanUp,ReferenceOTU524330	0	0	0	0	3.2542e-06	0	2.77185e-05	1.56839e-06	0	0	0	0	0	0	Bacteria; Bacteroidetes; Flavobacteriia; Flavobacteriales; Flavobacteriaceae; Lutibacter; uncultured bacterium
New,CleanUp,ReferenceOTU681604	0	0	0	0	0	6.12077e-06	0	4.70517e-06	2.16344e-05	0	0	0	0	0	Bacteria; Proteobacteria; Epsilonproteobacteria; Nautiliales; Nautiliaceae; uncultured; uncultured proteobacterium
New,CleanUp,ReferenceOTU859253	0	0	0	0	0	8.16103e-06	2.11188e-05	3.13678e-06	0	0	0	0	0	0	Unassigned
New,ReferenceOTU2431	0	0	0	0	0	0	0	4.70517e-06	0	2.76508e-05	0	0	0	0	Bacteria; Proteobacteria; Epsilonproteobacteria; Campylobacterales; Helicobacteraceae; Sulfurovum; uncultured epsilon proteobacterium
New,ReferenceOTU780	0	0	0	0	0	4.08051e-06	2.50786e-05	3.13678e-06	0	0	0	0	0	0	Bacteria; Bacteroidetes; SB-1; uncultured bacterium; uncultured bacterium; uncultured bacterium; uncultured bacterium
New,CleanUp,ReferenceOTU332258	0	0	3.34133e-06	0	0	1.63221e-05	2.63985e-06	0	9.98511e-06	0	0	0	0	0	Bacteria; Proteobacteria; Epsilonproteobacteria; Campylobacterales; Helicobacteraceae; Sulfurovum
New,CleanUp,ReferenceOTU1055110	0	0	0	0	0	5.10064e-06	2.24387e-05	4.70517e-06	0	0	0	0	0	0	Bacteria; Proteobacteria; Epsilonproteobacteria; Campylobacterales; Campylobacteraceae; Arcobacter
New,CleanUp,ReferenceOTU1079539	0	0	0	0	0	1.32617e-05	3.95978e-06	9.41033e-06	0	5.53016e-06	0	0	0	0	Bacteria; BD1-5; uncultured bacterium; uncultured bacterium; uncultured bacterium; uncultured bacterium; uncultured bacterium
New,CleanUp,ReferenceOTU18354	0	0	0	0	0	1.02013e-05	0	2.19574e-05	0	0	0	0	0	0	Bacteria; Proteobacteria; Epsilonproteobacteria; Campylobacterales; Helicobacteraceae; Sulfurovum; uncultured bacterium
New,CleanUp,ReferenceOTU269339	0	0	1.11378e-06	0	0	1.93824e-05	0	0	1.16493e-05	0	0	0	0	0	Bacteria; Proteobacteria; Epsilonproteobacteria; Campylobacterales; Helicobacteraceae; Sulfurovum; uncultured epsilon proteobacterium
New,CleanUp,ReferenceOTU347492	0	0	0	0	0	0	3.03583e-05	1.56839e-06	0	0	0	0	0	0	Bacteria; Proteobacteria; Deltaproteobacteria; Desulfobacterales; Desulfobacteraceae; uncultured; uncultured bacterium
New,CleanUp,ReferenceOTU329378	0	0	0	0	0	2.34629e-05	5.27971e-06	3.13678e-06	0	0	0	0	0	0	Bacteria; Proteobacteria; Epsilonproteobacteria; Campylobacterales; Helicobacteraceae; Sulfurovum; uncultured bacterium
New,CleanUp,ReferenceOTU29110	0	0	0	0	0	2.04026e-06	0	2.97994e-05	0	0	0	0	0	0	Bacteria; Proteobacteria; Epsilonproteobacteria; Nautiliales; Nautiliaceae; Nitratifractor; uncultured bacterium
New,CleanUp,ReferenceOTU865401	0	0	0	0	0	1.53019e-05	1.31993e-05	0	3.32837e-06	0	0	0	0	0	Bacteria; BD1-5
New,CleanUp,ReferenceOTU151544	0	0	0	0	0	5.10064e-06	0	2.66626e-05	0	0	0	0	0	0	Bacteria; Proteobacteria; Epsilonproteobacteria; Campylobacterales; Helicobacteraceae; Sulfurovum
New,CleanUp,ReferenceOTU1012141	0	0	0	0	0	2.75435e-05	2.63985e-06	1.56839e-06	0	0	0	0	0	0	Bacteria; Proteobacteria; Epsilonproteobacteria; Campylobacterales; Helicobacteraceae; Sulfurovum; uncultured bacterium
FJ792441,1,1307	0	0	1.33653e-05	0	0	2.04026e-06	1.31993e-05	3.13678e-06	0	0	0	0	0	0	Bacteria; Proteobacteria; Epsilonproteobacteria; Campylobacterales; Helicobacteraceae; Sulfurovum; uncultured bacterium
New,CleanUp,ReferenceOTU1066525	0	0	0	0	0	1.83623e-05	3.95978e-06	9.41033e-06	0	0	0	0	0	0	Bacteria; Bacteroidetes; Bacteroidia; Bacteroidales; Marinilabiaceae; uncultured; uncultured bacterium
New,CleanUp,ReferenceOTU1096027	0	0	0	0	0	0	0	2.66626e-05	4.99255e-06	0	0	0	0	0	Bacteria; Proteobacteria; Gammaproteobacteria; Thiotrichales; Piscirickettsiaceae; Thiomicrospira; uncultured gamma proteobacterium
New,CleanUp,ReferenceOTU580339	0	0	0	0	0	1.02013e-06	2.90384e-05	1.56839e-06	0	0	0	0	0	0	Unassigned
New,CleanUp,ReferenceOTU90466	0	0	0	0	0	2.65233e-05	0	1.56839e-06	1.66418e-06	1.84339e-06	0	0	0	0	Bacteria; Proteobacteria; Epsilonproteobacteria; Nautiliales; Nautiliaceae; Caminibacter
New,CleanUp,ReferenceOTU603168	0	0	3.34133e-06	0	0	2.04026e-05	0	7.84194e-06	0	0	0	0	0	0	Bacteria; Proteobacteria; Epsilonproteobacteria; Campylobacterales; Helicobacteraceae; Sulfurovum; uncultured bacterium
New,CleanUp,ReferenceOTU1118402	0	0	0	0	0	9.18115e-06	1.58391e-05	1.56839e-06	4.99255e-06	0	0	0	0	0	Bacteria; Proteobacteria; Gammaproteobacteria; Alteromonadales; Colwelliaceae
New,CleanUp,ReferenceOTU81818	0	0	0	0	0	2.04026e-06	0	0	0	2.94942e-05	0	0	0	0	Unassigned
New,CleanUp,ReferenceOTU992376	0	0	0	0	0	0	0	2.97994e-05	1.66418e-06	0	0	0	0	0	Bacteria; Proteobacteria; Gammaproteobacteria; Thiotrichales; Piscirickettsiaceae; Thiomicrospira; uncultured gamma proteobacterium
GU369929,1,1382	0	0	0	0	0	1.73422e-05	0	1.41155e-05	0	0	0	0	0	0	Bacteria; Proteobacteria; Epsilonproteobacteria; Campylobacterales; Helicobacteraceae; Sulfurovum
New,CleanUp,ReferenceOTU783771	0	0	0	0	0	6.12077e-06	2.37587e-05	1.56839e-06	0	0	0	0	0	0	Bacteria; Bacteroidetes; Sphingobacteriia; Sphingobacteriales; WCHB1-69
New,CleanUp,ReferenceOTU744941	0	0	0	0	0	6.12077e-06	3.95978e-06	4.70517e-06	1.66418e-05	0	0	0	0	0	Bacteria; Proteobacteria; Epsilonproteobacteria; Campylobacterales; Helicobacteraceae; Sulfurimonas; uncultured bacterium
New,CleanUp,ReferenceOTU819209	0	0	0	0	0	1.02013e-06	0	2.03891e-05	9.98511e-06	0	0	0	0	0	Bacteria; Proteobacteria; Epsilonproteobacteria; Campylobacterales; Helicobacteraceae; Sulfurovum; uncultured bacterium
New,CleanUp,ReferenceOTU647475	0	0	0	0	0	3.06038e-06	7.91956e-06	2.03891e-05	0	0	0	0	0	0	Bacteria; Proteobacteria; Epsilonproteobacteria; Campylobacterales; Helicobacteraceae; Sulfurimonas; uncultured bacterium
New,CleanUp,ReferenceOTU1125158	0	0	0	0	0	0	0	3.13678e-05	0	0	0	0	0	0	Unassigned
New,CleanUp,ReferenceOTU1015064	0	0	0	0	0	0	0	3.13678e-05	0	0	0	0	0	0	Unassigned
New,CleanUp,ReferenceOTU539519	0	0	0	0	0	0	0	3.13678e-05	0	0	0	0	0	0	Bacteria; Proteobacteria
New,CleanUp,ReferenceOTU352272	0	0	0	0	0	0	0	3.13678e-05	0	0	0	0	0	0	Bacteria; Bacteroidetes; VC2,1 Bac22; uncultured bacterium; uncultured bacterium; uncultured bacterium; uncultured bacterium
New,CleanUp,ReferenceOTU602493	0	0	0	0	0	0	0	3.13678e-05	0	0	0	0	0	0	Unassigned
New,CleanUp,ReferenceOTU901185	0	0	0	0	0	0	0	3.13678e-05	0	0	0	0	0	0	Unassigned
New,CleanUp,ReferenceOTU475542	0	0	0	0	0	0	0	0	0	3.13376e-05	0	0	0	0	Bacteria; Proteobacteria; Deltaproteobacteria; Myxococcales; Sandaracinaceae; Sandaracinus; uncultured bacterium
New,CleanUp,ReferenceOTU1089162	0	0	0	0	0	0	0	0	0	3.13376e-05	0	0	0	0	Bacteria; Proteobacteria; Deltaproteobacteria; Desulfobacterales; Desulfobulbaceae; Desulfobulbus; uncultured bacterium
New,CleanUp,ReferenceOTU894474	0	0	0	0	0	0	0	0	0	3.13376e-05	0	0	0	0	Bacteria; Proteobacteria; Epsilonproteobacteria; Nautiliales; Nautiliaceae; Nitratifractor; uncultured bacterium
New,CleanUp,ReferenceOTU735660	0	0	0	0	0	0	0	0	0	3.13376e-05	0	0	0	0	Bacteria; Proteobacteria; Epsilonproteobacteria; Nautiliales; Nautiliaceae; Nitratifractor; uncultured bacterium
New,CleanUp,ReferenceOTU702576	0	0	0	0	0	0	0	0	0	3.13376e-05	0	0	0	0	Unassigned
EU169192,1,1393	0	0	0	0	0	0	0	0	0	3.13376e-05	0	0	0	0	Bacteria; Proteobacteria; Gammaproteobacteria; Pseudomonadales; Pseudomonadaceae; Pseudomonas
New,CleanUp,ReferenceOTU334008	0	0	0	0	0	0	0	0	0	3.13376e-05	0	0	0	0	Unassigned
New,CleanUp,ReferenceOTU573036	0	0	0	0	0	0	0	0	0	3.13376e-05	0	0	0	0	Bacteria; Proteobacteria; Epsilonproteobacteria; Campylobacterales; Helicobacteraceae; Sulfurovum
New,CleanUp,ReferenceOTU48333	0	0	0	0	0	0	0	0	0	3.13376e-05	0	0	0	0	Bacteria; Proteobacteria; Deltaproteobacteria; Desulfobacterales; Desulfobulbaceae; Desulfobulbus; uncultured bacterium
New,CleanUp,ReferenceOTU1123978	0	0	0	0	0	0	0	0	0	3.13376e-05	0	0	0	0	Bacteria; Proteobacteria; Epsilonproteobacteria; Nautiliales; Nautiliaceae; Nitratifractor; uncultured bacterium
New,CleanUp,ReferenceOTU30295	0	0	0	0	0	0	0	0	0	3.13376e-05	0	0	0	0	Archaea; Euryarchaeota; Archaeoglobi; Archaeoglobales; Archaeoglobaceae
New,CleanUp,ReferenceOTU286762	0	0	0	0	0	0	0	0	0	3.13376e-05	0	0	0	0	Unassigned
New,CleanUp,ReferenceOTU1113275	0	0	0	0	0	2.34629e-05	0	7.84194e-06	0	0	0	0	0	0	Bacteria; Proteobacteria; Epsilonproteobacteria; Campylobacterales; Helicobacteraceae; Sulfurovum
New,CleanUp,ReferenceOTU274482	0	0	0	0	0	3.06038e-06	0	2.8231e-05	0	0	0	0	0	0	Bacteria; Proteobacteria; Epsilonproteobacteria; Nautiliales; Nautiliaceae; Caminibacter; uncultured bacterium
New,CleanUp,ReferenceOTU132110	0	0	0	0	0	1.12214e-05	1.8479e-05	1.56839e-06	0	0	0	0	0	0	Bacteria; Proteobacteria; Epsilonproteobacteria; Campylobacterales; Helicobacteraceae; Sulfurimonas; uncultured bacterium
New,CleanUp,ReferenceOTU149734	0	0	0	0	0	6.12077e-06	0	2.50942e-05	0	0	0	0	0	0	Bacteria; Proteobacteria; Epsilonproteobacteria; Campylobacterales; Helicobacteraceae; Sulfurimonas; uncultured bacterium
New,CleanUp,ReferenceOTU489629	0	0	0	0	0	9.18115e-06	0	2.19574e-05	0	0	0	0	0	0	Bacteria; Proteobacteria; Epsilonproteobacteria; Campylobacterales; Helicobacteraceae; Sulfurovum; uncultured bacterium
New,CleanUp,ReferenceOTU1021383	0	0	0	0	0	8.16103e-06	1.97989e-05	3.13678e-06	0	0	0	0	0	0	Bacteria; Proteobacteria; Epsilonproteobacteria; Campylobacterales; Helicobacteraceae; Sulfurimonas; uncultured epsilon proteobacterium
New,CleanUp,ReferenceOTU606191	0	0	0	0	0	0	5.27971e-06	0	0	2.58074e-05	0	0	0	0	Bacteria; Firmicutes; Clostridia; Clostridiales; Ruminococcaceae; uncultured; uncultured organism
New,CleanUp,ReferenceOTU675815	0	0	0	0	0	0	0	1.56839e-06	0	2.94942e-05	0	0	0	0	Bacteria; Bacteroidetes; Flavobacteriia; Flavobacteriales; R103-B20; uncultured bacterium; uncultured bacterium
New,ReferenceOTU382	0	0	0	0	0	0	0	9.41033e-06	2.16344e-05	0	0	0	0	0	Bacteria; Proteobacteria; Epsilonproteobacteria; Nautiliales; Nautiliaceae; uncultured; uncultured proteobacterium
New,CleanUp,ReferenceOTU1075130	0	0	0	0	0	2.65233e-05	2.63985e-06	0	0	1.84339e-06	0	0	0	0	Bacteria; Proteobacteria; Epsilonproteobacteria; Campylobacterales; Helicobacteraceae; Sulfurovum; uncultured bacterium
New,ReferenceOTU1845	0	0	0	0	0	1.53019e-05	0	1.56839e-05	0	0	0	0	0	0	Bacteria; Proteobacteria; Epsilonproteobacteria; Campylobacterales; Helicobacteraceae; Sulfurovum; uncultured bacterium
New,CleanUp,ReferenceOTU680021	0	0	0	0	0	2.14227e-05	7.91956e-06	1.56839e-06	0	0	0	0	0	0	Bacteria; Bacteroidetes; Bacteroidia; Bacteroidales; Marinilabiaceae; uncultured; uncultured bacterium
New,CleanUp,ReferenceOTU380736	0	0	0	0	0	0	2.63985e-06	2.8231e-05	0	0	0	0	0	0	Bacteria; Proteobacteria; Epsilonproteobacteria; Campylobacterales; Helicobacteraceae; Sulfurimonas; uncultured bacterium
New,CleanUp,ReferenceOTU75043	0	0	0	0	0	1.02013e-06	2.63985e-05	1.56839e-06	0	1.84339e-06	0	0	0	0	Bacteria; Proteobacteria; Epsilonproteobacteria; Campylobacterales; Helicobacteraceae; Sulfurovum; uncultured epsilon proteobacterium
New,CleanUp,ReferenceOTU295441	0	0	0	0	0	1.02013e-06	0	2.97994e-05	0	0	0	0	0	0	Bacteria; Proteobacteria; Epsilonproteobacteria; Campylobacterales; Helicobacteraceae; Sulfurimonas; uncultured bacterium
New,CleanUp,ReferenceOTU921264	0	0	0	0	0	0	1.31993e-06	0	0	2.94942e-05	0	0	0	0	Bacteria; Aquificae; Aquificae; Aquificales; Desulfurobacteriaceae
New,CleanUp,ReferenceOTU322186	0	0	0	0	0	2.44831e-05	0	6.27356e-06	0	0	0	0	0	0	Bacteria; Aquificae; Aquificae; Aquificales; Desulfurobacteriaceae; Thermovibrio
New,CleanUp,ReferenceOTU776518	0	0	0	0	0	0	0	0	6.65674e-06	2.3964e-05	0	0	0	0	Archaea; Euryarchaeota; Archaeoglobi; Archaeoglobales; Archaeoglobaceae; Archaeoglobus
New,CleanUp,ReferenceOTU258583	0	0	0	0	0	0	6.59963e-06	0	0	2.3964e-05	0	0	0	0	Bacteria; Thermodesulfobacteria; Thermodesulfobacteria; Thermodesulfobacteriales; Thermodesulfobacteriaceae; Thermodesulfatator; Thermodesulfatator indicus DSM 15286
New,CleanUp,ReferenceOTU222888	0	0	0	0	0	8.16103e-06	1.45192e-05	7.84194e-06	0	0	0	0	0	0	Bacteria; Proteobacteria; Epsilonproteobacteria; Campylobacterales; Campylobacteraceae; Arcobacter; uncultured epsilon proteobacterium
New,CleanUp,ReferenceOTU1084410	0	0	0	0	0	1.63221e-05	0	1.41155e-05	0	0	0	0	0	0	Bacteria; Proteobacteria; Epsilonproteobacteria; Nautiliales; Nautiliaceae
New,CleanUp,ReferenceOTU708598	0	0	0	0	0	1.42818e-05	1.45192e-05	1.56839e-06	0	0	0	0	0	0	Bacteria; Bacteroidetes; Bacteroidia; Bacteroidales; Marinilabiaceae; uncultured; uncultured bacterium
New,CleanUp,ReferenceOTU1041446	0	0	0	0	0	9.18115e-06	1.31993e-05	6.27356e-06	1.66418e-06	0	0	0	0	0	Bacteria; Proteobacteria; Epsilonproteobacteria; Campylobacterales; Helicobacteraceae; Sulfurovum; uncultured bacterium
New,CleanUp,ReferenceOTU138877	0	0	0	0	0	2.24428e-05	0	7.84194e-06	0	0	0	0	0	0	Bacteria; Aquificae; Aquificae; Aquificales; Desulfurobacteriaceae; Thermovibrio
New,CleanUp,ReferenceOTU1011874	0	0	0	0	0	2.04026e-06	0	2.8231e-05	0	0	0	0	0	0	Bacteria; Proteobacteria; Epsilonproteobacteria; Nautiliales; Nautiliaceae; Thioreductor
AB015257,1,1481	0	0	0	0	2.16947e-06	9.18115e-06	1.05594e-05	0	8.32092e-06	0	0	0	0	0	Bacteria; Proteobacteria; Epsilonproteobacteria; Campylobacterales; Helicobacteraceae; Sulfurimonas; uncultured bacterium
New,CleanUp,ReferenceOTU1107116	0	0	0	0	0	2.55032e-05	0	4.70517e-06	0	0	0	0	0	0	Bacteria; Proteobacteria; Epsilonproteobacteria; Campylobacterales; Helicobacteraceae; Sulfurimonas; uncultured bacterium
New,CleanUp,ReferenceOTU618658	0	0	0	0	0	0	0	2.35258e-05	6.65674e-06	0	0	0	0	0	Bacteria; Proteobacteria; Epsilonproteobacteria; Campylobacterales; Helicobacteraceae
GU291331,1,1491	0	0	0	0	0	1.02013e-06	0	1.56839e-05	1.33135e-05	0	0	0	0	0	Bacteria; Proteobacteria; Epsilonproteobacteria; Campylobacterales; Helicobacteraceae; Sulfurimonas
New,CleanUp,ReferenceOTU886456	0	0	0	0	0	1.42818e-05	0	1.56839e-05	0	0	0	0	0	0	Bacteria; Proteobacteria; Epsilonproteobacteria; Nautiliales; Nautiliaceae
New,CleanUp,ReferenceOTU412184	0	0	0	0	0	0	0	0	2.99553e-05	0	0	0	0	0	Unassigned
New,CleanUp,ReferenceOTU604562	0	0	0	0	0	0	0	0	2.99553e-05	0	0	0	0	0	Archaea; Euryarchaeota; Archaeoglobi; Archaeoglobales; Archaeoglobaceae; uncultured; uncultured archaeon
New,CleanUp,ReferenceOTU41989	0	0	0	0	0	6.12077e-06	0	1.88207e-05	4.99255e-06	0	0	0	0	0	Bacteria; Proteobacteria; Epsilonproteobacteria; Nautiliales; Nautiliaceae; Nitratifractor; uncultured bacterium
New,CleanUp,ReferenceOTU388035	0	0	1.11378e-06	0	0	0	6.59963e-06	0	1.66418e-05	5.53016e-06	0	0	0	0	Bacteria; Aquificae; Aquificae; Aquificales; Desulfurobacteriaceae; Desulfurobacterium
New,ReferenceOTU868	0	0	0	0	0	0	0	4.70517e-06	2.32986e-05	1.84339e-06	0	0	0	0	Archaea; Euryarchaeota; Archaeoglobi; Archaeoglobales; Archaeoglobaceae; uncultured; uncultured archaeon
JX391700,1,1477	0	0	1.11378e-06	0	0	2.04026e-06	2.50786e-05	1.56839e-06	0	0	0	0	0	0	Bacteria; Proteobacteria; Epsilonproteobacteria; Campylobacterales; Helicobacteraceae; Sulfurovum; uncultured bacterium
New,CleanUp,ReferenceOTU729303	0	0	0	0	0	0	0	2.97994e-05	0	0	0	0	0	0	Unassigned
New,CleanUp,ReferenceOTU864310	0	0	0	0	0	0	0	2.97994e-05	0	0	0	0	0	0	Bacteria; Bacteroidetes; VC2,1 Bac22; uncultured bacterium; uncultured bacterium; uncultured bacterium; uncultured bacterium
New,CleanUp,ReferenceOTU602351	0	0	0	0	0	0	0	2.97994e-05	0	0	0	0	0	0	Unassigned
New,CleanUp,ReferenceOTU165384	0	0	0	0	0	0	0	2.97994e-05	0	0	0	0	0	0	Unassigned
New,CleanUp,ReferenceOTU420742	0	0	0	0	0	0	0	2.97994e-05	0	0	0	0	0	0	Bacteria; Bacteroidetes; VC2,1 Bac22; uncultured bacterium; uncultured bacterium; uncultured bacterium; uncultured bacterium
New,CleanUp,ReferenceOTU542803	0	0	0	0	0	0	0	2.97994e-05	0	0	0	0	0	0	Unassigned
New,CleanUp,ReferenceOTU1067367	0	0	0	0	0	0	0	2.97994e-05	0	0	0	0	0	0	Bacteria; Proteobacteria; Epsilonproteobacteria; Campylobacterales; Helicobacteraceae; Sulfurovum
New,CleanUp,ReferenceOTU920629	0	0	0	0	0	0	0	2.97994e-05	0	0	0	0	0	0	Unassigned
New,CleanUp,ReferenceOTU965081	0	0	0	0	0	0	0	2.97994e-05	0	0	0	0	0	0	Unassigned
New,CleanUp,ReferenceOTU8862	0	0	0	0	0	0	0	2.97994e-05	0	0	0	0	0	0	Unassigned
New,CleanUp,ReferenceOTU67381	0	0	0	0	0	0	0	2.97994e-05	0	0	0	0	0	0	Unassigned
New,ReferenceOTU1206	0	0	0	0	0	0	0	2.97994e-05	0	0	0	0	0	0	Bacteria; Proteobacteria; Epsilonproteobacteria; Campylobacterales; Helicobacteraceae; Sulfurimonas; uncultured bacterium
New,CleanUp,ReferenceOTU366406	0	0	0	0	0	0	0	2.97994e-05	0	0	0	0	0	0	Unassigned
New,CleanUp,ReferenceOTU949049	0	0	0	0	0	1.12214e-05	1.31993e-06	1.72523e-05	0	0	0	0	0	0	Bacteria; Proteobacteria; Epsilonproteobacteria; Nautiliales; Nautiliaceae; Caminibacter; uncultured bacterium
New,CleanUp,ReferenceOTU411482	0	0	0	0	0	2.65233e-05	0	1.56839e-06	1.66418e-06	0	0	0	0	0	Bacteria; Proteobacteria; Epsilonproteobacteria; Nautiliales; Nautiliaceae; uncultured
New,CleanUp,ReferenceOTU451638	0	0	0	0	0	2.34629e-05	0	6.27356e-06	0	0	0	0	0	0	Bacteria; Proteobacteria; Epsilonproteobacteria; Nautiliales; Nautiliaceae; Thioreductor
New,CleanUp,ReferenceOTU869248	0	0	0	0	0	2.04026e-05	2.63985e-06	0	6.65674e-06	0	0	0	0	0	Bacteria; Proteobacteria; Epsilonproteobacteria; Campylobacterales
New,CleanUp,ReferenceOTU255719	0	0	1.11378e-06	0	0	1.32617e-05	1.05594e-05	4.70517e-06	0	0	0	0	0	0	Bacteria; Proteobacteria; Epsilonproteobacteria; Campylobacterales; Helicobacteraceae; Sulfurovum; uncultured bacterium
New,CleanUp,ReferenceOTU285821	0	0	0	0	0	0	1.31993e-06	2.8231e-05	0	0	0	0	0	0	Bacteria; Proteobacteria; Epsilonproteobacteria; Campylobacterales; Helicobacteraceae; Sulfurimonas; uncultured bacterium
New,CleanUp,ReferenceOTU326931	0	0	0	0	0	0	2.63985e-05	3.13678e-06	0	0	0	0	0	0	Bacteria; Bacteroidetes; Flavobacteriia; Flavobacteriales; Cryomorphaceae; Owenweeksia; uncultured bacterium
New,CleanUp,ReferenceOTU204916	0	0	1.11378e-06	0	0	1.93824e-05	2.63985e-06	4.70517e-06	1.66418e-06	0	0	0	0	0	Bacteria; Proteobacteria; Epsilonproteobacteria; Campylobacterales; Campylobacteraceae; Arcobacter; uncultured epsilon proteobacterium
New,CleanUp,ReferenceOTU387757	0	0	0	0	0	0	0	0	0	2.94942e-05	0	0	0	0	Bacteria; Aquificae; Aquificae; Aquificales; Desulfurobacteriaceae; Desulfurobacterium
New,CleanUp,ReferenceOTU859301	0	0	0	0	0	0	0	0	0	2.94942e-05	0	0	0	0	Bacteria; Aquificae; Aquificae; Aquificales; Desulfurobacteriaceae; Desulfurobacterium
New,CleanUp,ReferenceOTU915871	0	0	0	0	0	0	0	0	0	2.94942e-05	0	0	0	0	Bacteria; Aquificae; Aquificae; Aquificales; Desulfurobacteriaceae; Desulfurobacterium
New,CleanUp,ReferenceOTU1146851	0	0	0	0	0	0	0	0	0	2.94942e-05	0	0	0	0	Bacteria; Aquificae; Aquificae; Aquificales; Desulfurobacteriaceae; Desulfurobacterium
New,CleanUp,ReferenceOTU1065836	0	0	0	0	0	0	0	0	0	2.94942e-05	0	0	0	0	Archaea; Marine Hydrothermal Vent Group 1(MHVG-1); uncultured archaeon; uncultured archaeon; uncultured archaeon; uncultured archaeon; uncultured archaeon
New,CleanUp,ReferenceOTU930128	0	0	0	0	0	0	0	0	0	2.94942e-05	0	0	0	0	Bacteria; Aquificae; Aquificae; Aquificales; Desulfurobacteriaceae; Desulfurobacterium
New,CleanUp,ReferenceOTU497769	0	0	0	0	0	0	0	0	0	2.94942e-05	0	0	0	0	Bacteria; Proteobacteria; Epsilonproteobacteria; Nautiliales; Nautiliaceae; Nitratifractor; uncultured bacterium
New,CleanUp,ReferenceOTU1069481	0	0	0	0	0	0	0	0	0	2.94942e-05	0	0	0	0	Bacteria; Proteobacteria; Epsilonproteobacteria; Nautiliales; Nautiliaceae; Nitratifractor; uncultured bacterium
New,CleanUp,ReferenceOTU972675	0	0	0	0	0	1.02013e-06	1.31993e-06	3.13678e-06	0	2.3964e-05	0	0	0	0	Bacteria; Proteobacteria; Epsilonproteobacteria; Nautiliales; Nautiliaceae; Nitratifractor; uncultured bacterium
New,CleanUp,ReferenceOTU508439	0	0	0	0	0	1.02013e-06	0	2.8231e-05	0	0	0	0	0	0	Bacteria; Proteobacteria; Epsilonproteobacteria; Campylobacterales; Helicobacteraceae; Sulfurimonas; uncultured bacterium
New,CleanUp,ReferenceOTU1095558	0	0	0	0	0	1.02013e-06	0	2.8231e-05	0	0	0	0	0	0	Bacteria; Proteobacteria; Epsilonproteobacteria; Campylobacterales; Helicobacteraceae; Sulfurimonas; uncultured bacterium
New,CleanUp,ReferenceOTU464720	0	0	0	0	0	1.02013e-06	0	2.8231e-05	0	0	0	0	0	0	Bacteria; Proteobacteria; Epsilonproteobacteria; Campylobacterales; Helicobacteraceae; Sulfurovum
New,CleanUp,ReferenceOTU562146	0	0	2.22755e-06	0	0	1.63221e-05	2.63985e-06	7.84194e-06	0	0	0	0	0	0	Bacteria; Proteobacteria; Epsilonproteobacteria; Campylobacterales; Helicobacteraceae; Sulfurovum; uncultured epsilon proteobacterium
JQ072950,1,1372	0	0	0	0	0	1.02013e-05	0	1.88207e-05	0	0	0	0	0	0	Bacteria; Proteobacteria; Epsilonproteobacteria; Campylobacterales; Helicobacteraceae; Sulfurovum
New,CleanUp,ReferenceOTU150140	0	0	0	0	0	0	0	1.56839e-05	1.33135e-05	0	0	0	0	0	Bacteria; Proteobacteria; Epsilonproteobacteria; Campylobacterales; Helicobacteraceae; Sulfurovum; uncultured epsilon proteobacterium
New,CleanUp,ReferenceOTU811673	0	0	2.22755e-06	0	0	1.73422e-05	0	9.41033e-06	0	0	0	0	0	0	Bacteria; Bacteroidetes; Bacteroidia; Bacteroidales; Marinilabiaceae; uncultured; uncultured bacterium
New,CleanUp,ReferenceOTU692543	0	0	0	0	0	2.04026e-06	0	2.50942e-05	0	1.84339e-06	0	0	0	0	Bacteria; Deinococcus-Thermus; Deinococci; Thermales; Thermaceae; Oceanithermus; uncultured bacterium
New,CleanUp,ReferenceOTU303574	0	0	0	0	0	1.32617e-05	0	1.56839e-05	0	0	0	0	0	0	Bacteria; Proteobacteria; Epsilonproteobacteria; Campylobacterales; Helicobacteraceae; Sulfurimonas; uncultured bacterium
New,CleanUp,ReferenceOTU769962	0	0	1.11378e-06	0	0	2.44831e-05	0	0	3.32837e-06	0	0	0	0	0	Bacteria; Proteobacteria; Epsilonproteobacteria
New,CleanUp,ReferenceOTU941489	0	0	0	0	0	2.24428e-05	0	3.13678e-06	3.32837e-06	0	0	0	0	0	Bacteria; Proteobacteria; Epsilonproteobacteria; Nautiliales; Nautiliaceae; Thioreductor
New,CleanUp,ReferenceOTU25031	0	0	0	0	0	0	0	1.88207e-05	9.98511e-06	0	0	0	0	0	Bacteria; Caldiserica; Caldisericia; Caldisericales; Caldisericaceae; Caldisericum; uncultured Caldiserica bacterium
New,CleanUp,ReferenceOTU725068	0	0	0	0	0	2.04026e-06	0	2.50942e-05	1.66418e-06	0	0	0	0	0	Bacteria; Proteobacteria; Epsilonproteobacteria; Campylobacterales; Helicobacteraceae; Sulfurimonas
New,CleanUp,ReferenceOTU34276	0	0	0	0	0	2.04026e-06	0	2.66626e-05	0	0	0	0	0	0	Bacteria; Proteobacteria; Epsilonproteobacteria; Campylobacterales; Helicobacteraceae; Sulfurimonas; uncultured bacterium
New,CleanUp,ReferenceOTU685678	0	0	0	0	0	3.06038e-06	0	1.72523e-05	8.32092e-06	0	0	0	0	0	Bacteria; Proteobacteria; Epsilonproteobacteria; Campylobacterales; Helicobacteraceae; Sulfurimonas; uncultured bacterium
New,CleanUp,ReferenceOTU359967	0	0	0	0	0	5.10064e-06	0	2.35258e-05	0	0	0	0	0	0	Bacteria; Bacteroidetes; Flavobacteriia; Flavobacteriales; R103-B20; uncultured bacterium; uncultured bacterium
New,ReferenceOTU1408	0	0	0	0	0	0	0	2.50942e-05	1.66418e-06	1.84339e-06	0	0	0	0	Bacteria; Proteobacteria; Epsilonproteobacteria; Campylobacterales; Helicobacteraceae; Sulfurovum
New,CleanUp,ReferenceOTU1092608	0	0	0	0	0	0	0	2.35258e-05	4.99255e-06	0	0	0	0	0	Bacteria; Proteobacteria; Epsilonproteobacteria; Campylobacterales; Helicobacteraceae; Sulfurimonas
New,CleanUp,ReferenceOTU662735	0	0	0	0	0	6.12077e-06	1.58391e-05	3.13678e-06	3.32837e-06	0	0	0	0	0	Unassigned
New,CleanUp,ReferenceOTU1071619	0	0	0	0	0	0	0	2.50942e-05	3.32837e-06	0	0	0	0	0	Unassigned
New,CleanUp,ReferenceOTU1072915	0	0	6.68265e-06	0	0	4.08051e-06	1.45192e-05	3.13678e-06	0	0	0	0	0	0	Bacteria; Bacteroidetes; Sphingobacteriia; Sphingobacteriales; Chitinophagaceae; uncultured; uncultured bacterium
New,CleanUp,ReferenceOTU1033878	0	0	0	0	0	1.02013e-05	0	1.56839e-06	1.66418e-05	0	0	0	0	0	Bacteria; Aquificae; Aquificae; Aquificales; Desulfurobacteriaceae; Thermovibrio
New,CleanUp,ReferenceOTU1067790	0	0	0	0	0	1.12214e-05	9.23948e-06	7.84194e-06	0	0	0	0	0	0	Bacteria; Proteobacteria; Epsilonproteobacteria; Campylobacterales; Helicobacteraceae; Sulfurovum
New,CleanUp,ReferenceOTU372394	0	0	0	0	0	0	0	0	2.82911e-05	0	0	0	0	0	Bacteria; Proteobacteria; Epsilonproteobacteria; Campylobacterales; Campylobacteraceae; Sulfurospirillum; uncultured bacterium
New,CleanUp,ReferenceOTU136546	0	0	0	0	0	0	0	0	2.82911e-05	0	0	0	0	0	Bacteria; Proteobacteria; Epsilonproteobacteria; Nautiliales; Nautiliaceae; uncultured; uncultured bacterium
New,CleanUp,ReferenceOTU435880	0	0	0	0	0	0	0	2.8231e-05	0	0	0	0	0	0	Bacteria; Caldiserica; Caldisericia; Caldisericales; Caldisericaceae; Caldisericum
New,CleanUp,ReferenceOTU438690	0	0	0	0	0	0	0	2.8231e-05	0	0	0	0	0	0	Bacteria; Proteobacteria; Epsilonproteobacteria; Nautiliales; Nautiliaceae; Nitratifractor; uncultured bacterium
New,CleanUp,ReferenceOTU669291	0	0	0	0	0	0	0	2.8231e-05	0	0	0	0	0	0	Bacteria; Proteobacteria
New,CleanUp,ReferenceOTU462739	0	0	0	0	0	0	0	2.8231e-05	0	0	0	0	0	0	Bacteria; Proteobacteria; Deltaproteobacteria; Desulfobacterales; Desulfobulbaceae; Desulfobulbus; uncultured bacterium
New,CleanUp,ReferenceOTU773769	0	0	0	0	0	0	0	2.8231e-05	0	0	0	0	0	0	Unassigned
New,CleanUp,ReferenceOTU642015	0	0	0	0	0	0	0	2.8231e-05	0	0	0	0	0	0	Bacteria; Bacteroidetes; VC2,1 Bac22; uncultured bacterium; uncultured bacterium; uncultured bacterium; uncultured bacterium
New,CleanUp,ReferenceOTU226125	0	0	0	0	0	0	0	2.8231e-05	0	0	0	0	0	0	Unassigned
New,CleanUp,ReferenceOTU922515	0	0	0	0	0	0	0	2.8231e-05	0	0	0	0	0	0	Bacteria; Proteobacteria; Epsilonproteobacteria; Campylobacterales; Helicobacteraceae
New,CleanUp,ReferenceOTU264443	0	0	0	0	0	0	0	2.8231e-05	0	0	0	0	0	0	Bacteria; Bacteroidetes; Flavobacteriia; Flavobacteriales; R103-B20; uncultured bacterium; uncultured bacterium
New,CleanUp,ReferenceOTU107993	0	0	0	0	0	0	0	2.8231e-05	0	0	0	0	0	0	Unassigned
New,CleanUp,ReferenceOTU953885	0	0	0	0	0	0	0	2.8231e-05	0	0	0	0	0	0	Bacteria; Bacteroidetes; Flavobacteriia; Flavobacteriales; R103-B20; uncultured bacterium; uncultured bacterium
New,CleanUp,ReferenceOTU186605	0	0	0	0	0	0	0	2.8231e-05	0	0	0	0	0	0	Unassigned
New,CleanUp,ReferenceOTU1146973	0	0	0	0	0	2.24428e-05	2.63985e-06	3.13678e-06	0	0	0	0	0	0	Bacteria; Proteobacteria; Epsilonproteobacteria; Campylobacterales; Campylobacteraceae; Arcobacter; uncultured epsilon proteobacterium
New,CleanUp,ReferenceOTU227765	0	0	0	0	0	0	0	1.56839e-06	2.66269e-05	0	0	0	0	0	Bacteria; Proteobacteria; Epsilonproteobacteria; Campylobacterales; Helicobacteraceae; Sulfurimonas; uncultured epsilon proteobacterium
New,CleanUp,ReferenceOTU315282	0	0	0	0	0	0	0	1.56839e-06	2.66269e-05	0	0	0	0	0	Bacteria; Proteobacteria; Epsilonproteobacteria; Campylobacterales; Helicobacteraceae; Sulfurimonas; uncultured bacterium
New,CleanUp,ReferenceOTU169411	0	0	0	0	0	2.65233e-05	0	0	1.66418e-06	0	0	0	0	0	Bacteria; Proteobacteria; Epsilonproteobacteria; Nautiliales; Nautiliaceae; Caminibacter; uncultured bacterium
New,CleanUp,ReferenceOTU780163	0	0	5.56888e-06	0	0	1.02013e-05	5.27971e-06	1.56839e-06	0	5.53016e-06	0	0	0	0	Bacteria; Proteobacteria; Epsilonproteobacteria; Campylobacterales; Helicobacteraceae; Sulfurovum; uncultured bacterium
New,CleanUp,ReferenceOTU635030	0	0	0	0	0	2.65233e-05	0	1.56839e-06	0	0	0	0	0	0	Bacteria; Proteobacteria; Epsilonproteobacteria; Campylobacterales; Helicobacteraceae; Sulfurimonas
New,CleanUp,ReferenceOTU771483	0	0	0	0	0	6.12077e-06	0	2.19574e-05	0	0	0	0	0	0	Bacteria; Proteobacteria; Epsilonproteobacteria; Campylobacterales; Helicobacteraceae; Sulfurovum; uncultured bacterium
New,CleanUp,ReferenceOTU44261	0	0	0	0	0	1.53019e-05	0	9.41033e-06	3.32837e-06	0	0	0	0	0	Bacteria; Proteobacteria; Epsilonproteobacteria; Campylobacterales; Helicobacteraceae; Sulfurovum
New,CleanUp,ReferenceOTU90596	0	0	0	0	0	0	0	4.70517e-06	2.32986e-05	0	0	0	0	0	Bacteria; Proteobacteria; Epsilonproteobacteria; Campylobacterales; Helicobacteraceae; Sulfurimonas
New,CleanUp,ReferenceOTU267276	0	0	0	0	0	2.04026e-05	1.31993e-06	6.27356e-06	0	0	0	0	0	0	Bacteria; Bacteroidetes
New,CleanUp,ReferenceOTU752267	0	0	0	0	0	1.22415e-05	0	1.56839e-05	0	0	0	0	0	0	Bacteria; Proteobacteria; Epsilonproteobacteria; Campylobacterales; Helicobacteraceae; Sulfurovum; uncultured bacterium
New,CleanUp,ReferenceOTU529611	0	0	0	0	0	0	0	6.27356e-06	2.16344e-05	0	0	0	0	0	Bacteria; Proteobacteria; Epsilonproteobacteria; Campylobacterales; Helicobacteraceae; Sulfurovum; uncultured bacterium
New,CleanUp,ReferenceOTU437059	0	0	0	0	0	0	2.63985e-06	1.56839e-06	1.99702e-05	3.68677e-06	0	0	0	0	Bacteria; Aquificae; Aquificae; Aquificales; Hydrogenothermaceae; Sulfurihydrogenibium; uncultured bacterium
New,CleanUp,ReferenceOTU1078883	0	0	0	0	0	1.83623e-05	7.91956e-06	1.56839e-06	0	0	0	0	0	0	Bacteria; Proteobacteria; Epsilonproteobacteria; Campylobacterales; Helicobacteraceae; Sulfurovum
New,CleanUp,ReferenceOTU551157	0	0	0	0	0	1.53019e-05	0	1.25471e-05	0	0	0	0	0	0	Bacteria; Proteobacteria; Epsilonproteobacteria; Nautiliales; Nautiliaceae; Caminibacter; uncultured bacterium
New,CleanUp,ReferenceOTU716133	0	0	0	0	0	1.83623e-05	0	9.41033e-06	0	0	0	0	0	0	Bacteria; Proteobacteria; Epsilonproteobacteria; Campylobacterales; Helicobacteraceae; Sulfurovum; uncultured epsilon proteobacterium
New,CleanUp,ReferenceOTU336743	0	0	0	0	0	1.02013e-05	1.58391e-05	0	1.66418e-06	0	0	0	0	0	Bacteria; Proteobacteria; Epsilonproteobacteria; Campylobacterales; Helicobacteraceae; Sulfurimonas; uncultured epsilon proteobacterium
New,CleanUp,ReferenceOTU430260	0	0	0	0	0	2.14227e-05	0	6.27356e-06	0	0	0	0	0	0	Bacteria; Proteobacteria; Epsilonproteobacteria; Campylobacterales; Helicobacteraceae; Sulfurovum; uncultured bacterium
New,CleanUp,ReferenceOTU46436	0	0	0	0	0	1.02013e-06	0	2.66626e-05	0	0	0	0	0	0	Unassigned
New,CleanUp,ReferenceOTU842936	0	0	0	0	0	1.02013e-06	0	2.66626e-05	0	0	0	0	0	0	Bacteria; Proteobacteria; Deltaproteobacteria; Desulfobacterales; Desulfobulbaceae; Desulfobulbus; uncultured bacterium
New,CleanUp,ReferenceOTU160412	0	0	0	0	0	1.02013e-06	2.50786e-05	1.56839e-06	0	0	0	0	0	0	Bacteria; Bacteroidetes; Flavobacteriia; Flavobacteriales; Flavobacteriaceae
New,CleanUp,ReferenceOTU761362	0	0	0	0	0	0	0	0	0	2.76508e-05	0	0	0	0	Bacteria; Thermodesulfobacteria; Thermodesulfobacteria; Thermodesulfobacteriales; Thermodesulfobacteriaceae; uncultured Thermodesulfobacteriaceae bacterium; uncultured Thermodesulfobacteriaceae bacterium
FN429809,1,1489	0	0	0	0	0	0	0	0	0	2.76508e-05	0	0	0	0	Bacteria; Proteobacteria; Deltaproteobacteria; Desulfobacterales; Desulfobacteraceae
EU559691,1,933	0	0	0	0	0	0	0	0	0	2.76508e-05	0	0	0	0	Archaea; Crenarchaeota; Thermoprotei; Desulfurococcales; Desulfurococcaceae; uncultured; uncultured archaeon
AB845279,1,1381	0	0	0	0	0	0	0	0	0	2.76508e-05	0	0	0	0	Bacteria; Proteobacteria; Gammaproteobacteria; Enterobacteriales; Enterobacteriaceae
New,CleanUp,ReferenceOTU173162	0	0	0	0	0	0	0	0	0	2.76508e-05	0	0	0	0	Bacteria; Aquificae; Aquificae; Aquificales; Desulfurobacteriaceae; Desulfurobacterium
New,CleanUp,ReferenceOTU1008629	0	0	0	0	0	0	0	0	0	2.76508e-05	0	0	0	0	Bacteria; Aquificae; Aquificae; Aquificales; Desulfurobacteriaceae; Desulfurobacterium
New,CleanUp,ReferenceOTU100382	0	0	0	0	0	0	0	0	0	2.76508e-05	0	0	0	0	Unassigned
New,CleanUp,ReferenceOTU1072801	0	0	0	0	0	0	0	0	0	2.76508e-05	0	0	0	0	Bacteria; Aquificae; Aquificae; Aquificales; Desulfurobacteriaceae; Desulfurobacterium
New,CleanUp,ReferenceOTU359111	0	0	0	0	0	0	0	0	0	2.76508e-05	0	0	0	0	Bacteria; Aquificae; Aquificae; Aquificales; Desulfurobacteriaceae; Desulfurobacterium
New,CleanUp,ReferenceOTU915988	0	0	0	0	0	0	0	0	0	2.76508e-05	0	0	0	0	Bacteria; Aquificae; Aquificae; Aquificales; Desulfurobacteriaceae; Desulfurobacterium
New,CleanUp,ReferenceOTU516995	0	0	0	0	0	0	0	0	0	2.76508e-05	0	0	0	0	Bacteria; Proteobacteria; Deltaproteobacteria; 43F-1404R; uncultured organism; uncultured organism; uncultured organism
New,CleanUp,ReferenceOTU915883	0	0	0	0	0	1.02013e-06	0	0	2.66269e-05	0	0	0	0	0	Bacteria; Proteobacteria; Epsilonproteobacteria; Campylobacterales; Helicobacteraceae; Sulfurimonas; uncultured bacterium
New,ReferenceOTU228	0	0	0	0	0	7.1409e-06	0	1.88207e-05	1.66418e-06	0	0	0	0	0	Unassigned
New,CleanUp,ReferenceOTU208970	0	0	0	0	0	2.44831e-05	0	3.13678e-06	0	0	0	0	0	0	Bacteria; Proteobacteria; Epsilonproteobacteria; Campylobacterales; Helicobacteraceae; Sulfurovum; uncultured bacterium
New,CleanUp,ReferenceOTU65165	0	0	1.11378e-06	0	0	1.73422e-05	1.31993e-06	7.84194e-06	0	0	0	0	0	0	Bacteria; Proteobacteria; Epsilonproteobacteria; Campylobacterales; Helicobacteraceae; Sulfurimonas
New,CleanUp,ReferenceOTU844307	0	0	0	0	0	4.08051e-06	0	2.35258e-05	0	0	0	0	0	0	Unassigned
New,CleanUp,ReferenceOTU240121	0	0	0	0	0	4.08051e-06	0	2.35258e-05	0	0	0	0	0	0	Bacteria; Proteobacteria; Gammaproteobacteria; Thiotrichales; Piscirickettsiaceae; Thiomicrospira; uncultured gamma proteobacterium
New,CleanUp,ReferenceOTU532168	0	0	0	0	0	2.04026e-06	0	1.09787e-05	1.66418e-06	1.29037e-05	0	0	0	0	Bacteria; BHI80-139
New,CleanUp,ReferenceOTU426809	0	0	0	0	0	7.1409e-06	0	2.03891e-05	0	0	0	0	0	0	Bacteria; Proteobacteria; Epsilonproteobacteria; Campylobacterales; Helicobacteraceae; Sulfurovum; uncultured bacterium
New,CleanUp,ReferenceOTU1131005	0	0	0	0	0	2.44831e-05	1.31993e-06	0	1.66418e-06	0	0	0	0	0	Bacteria; Proteobacteria; Epsilonproteobacteria; Campylobacterales; Helicobacteraceae; Sulfurovum; uncultured bacterium
New,CleanUp,ReferenceOTU383367	0	0	0	0	0	2.55032e-05	0	0	0	1.84339e-06	0	0	0	0	Bacteria; Aquificae; Aquificae; Aquificales; Desulfurobacteriaceae
New,CleanUp,ReferenceOTU14649	0	0	0	0	0	0	0	2.19574e-05	1.66418e-06	3.68677e-06	0	0	0	0	Bacteria; Proteobacteria; Epsilonproteobacteria; Nautiliales; Nautiliaceae; Nitratifractor; uncultured bacterium
New,CleanUp,ReferenceOTU606157	0	0	0	0	0	2.24428e-05	0	4.70517e-06	0	0	0	0	0	0	Bacteria; Proteobacteria; Epsilonproteobacteria; Campylobacterales; Helicobacteraceae; Sulfurovum; uncultured bacterium
New,CleanUp,ReferenceOTU591251	0	0	0	0	0	0	0	1.88207e-05	8.32092e-06	0	0	0	0	0	Bacteria; Proteobacteria; Epsilonproteobacteria; Campylobacterales; Helicobacteraceae; Sulfurimonas; uncultured bacterium
New,CleanUp,ReferenceOTU139679	0	0	0	0	0	0	0	1.88207e-05	8.32092e-06	0	0	0	0	0	Bacteria; Proteobacteria; Deltaproteobacteria; Desulfurellales; Desulfurellaceae; Hippea
New,CleanUp,ReferenceOTU554140	0	0	0	0	0	0	1.31993e-06	0	0	2.58074e-05	0	0	0	0	Bacteria; Proteobacteria; Epsilonproteobacteria; Nautiliales; Nautiliaceae; Caminibacter; uncultured bacterium
New,CleanUp,ReferenceOTU246632	0	0	0	0	0	4.08051e-06	2.63985e-06	2.03891e-05	0	0	0	0	0	0	Bacteria; Firmicutes; Clostridia; Thermoanaerobacterales; Thermodesulfobiaceae; Coprothermobacter
New,CleanUp,ReferenceOTU21084	0	0	0	0	0	1.02013e-06	3.95978e-06	0	0	2.21206e-05	0	0	0	0	Unassigned
New,CleanUp,ReferenceOTU16047	0	0	0	0	0	2.55032e-05	0	1.56839e-06	0	0	0	0	0	0	Bacteria; Proteobacteria; Epsilonproteobacteria; Campylobacterales; Helicobacteraceae; Sulfurovum; uncultured epsilon proteobacterium
New,CleanUp,ReferenceOTU219922	0	0	0	0	0	2.55032e-05	0	1.56839e-06	0	0	0	0	0	0	Bacteria; Proteobacteria; Epsilonproteobacteria; Nautiliales; Nautiliaceae; Nitratifractor; uncultured bacterium
New,CleanUp,ReferenceOTU1146139	0	0	0	0	0	1.32617e-05	3.95978e-06	3.13678e-06	6.65674e-06	0	0	0	0	0	Bacteria; Verrucomicrobia; Verrucomicrobiae; Verrucomicrobiales; Verrucomicrobiaceae; Persicirhabdus; uncultured bacterium
New,CleanUp,ReferenceOTU656450	0	0	0	0	0	4.08051e-06	0	6.27356e-06	1.66418e-05	0	0	0	0	0	Unassigned
New,CleanUp,ReferenceOTU413540	0	0	0	0	0	1.93824e-05	1.31993e-06	6.27356e-06	0	0	0	0	0	0	Bacteria; Proteobacteria; Epsilonproteobacteria; Nautiliales; Nautiliaceae; Thioreductor
New,CleanUp,ReferenceOTU301441	0	0	0	0	0	1.02013e-06	3.95978e-06	2.19574e-05	0	0	0	0	0	0	Bacteria; Proteobacteria; Epsilonproteobacteria; Campylobacterales; Helicobacteraceae; Sulfurimonas; uncultured bacterium
New,CleanUp,ReferenceOTU347954	0	0	0	0	0	0	6.59963e-06	0	0	2.02772e-05	0	0	0	0	Unassigned
New,CleanUp,ReferenceOTU172541	0	0	0	0	0	0	0	2.35258e-05	3.32837e-06	0	0	0	0	0	Unassigned
New,CleanUp,ReferenceOTU564382	0	0	0	0	0	0	0	2.35258e-05	3.32837e-06	0	0	0	0	0	Bacteria; Proteobacteria; Epsilonproteobacteria; Campylobacterales; Helicobacteraceae; Sulfurovum; uncultured bacterium
New,CleanUp,ReferenceOTU646889	0	0	0	0	0	0	0	2.50942e-05	1.66418e-06	0	0	0	0	0	Bacteria; Deinococcus-Thermus; Deinococci; Thermales; Thermaceae; Oceanithermus; uncultured bacterium
New,CleanUp,ReferenceOTU129772	0	0	0	0	0	1.73422e-05	0	9.41033e-06	0	0	0	0	0	0	Bacteria; Proteobacteria; Epsilonproteobacteria; Campylobacterales; Helicobacteraceae; Sulfurimonas; uncultured bacterium
New,CleanUp,ReferenceOTU440522	0	0	0	0	0	3.06038e-06	0	2.19574e-05	1.66418e-06	0	0	0	0	0	Bacteria; Proteobacteria; Gammaproteobacteria; Thiotrichales; Piscirickettsiaceae; Thiomicrospira; uncultured gamma proteobacterium
New,CleanUp,ReferenceOTU1001745	0	0	0	0	0	0	0	2.66626e-05	0	0	0	0	0	0	Bacteria; Acidobacteria; Holophagae; Acanthopleuribacterales; Acanthopleuribacteraceae; Thermotomaculum
New,CleanUp,ReferenceOTU513836	0	0	0	0	0	0	0	2.66626e-05	0	0	0	0	0	0	Unassigned
New,CleanUp,ReferenceOTU105508	0	0	0	0	0	0	0	2.66626e-05	0	0	0	0	0	0	Bacteria; Proteobacteria; Deltaproteobacteria; Desulfurellales; Desulfurellaceae; Hippea; uncultured delta proteobacterium
New,CleanUp,ReferenceOTU1063972	0	0	0	0	0	0	0	2.66626e-05	0	0	0	0	0	0	Unassigned
New,CleanUp,ReferenceOTU1069553	0	0	0	0	0	0	0	2.66626e-05	0	0	0	0	0	0	Bacteria; Caldiserica; Caldisericia; Caldisericales; Caldisericaceae; Caldisericum
New,CleanUp,ReferenceOTU498795	0	0	0	0	0	0	0	2.66626e-05	0	0	0	0	0	0	Bacteria; Bacteroidetes; Flavobacteriia; Flavobacteriales; R103-B20; uncultured bacterium; uncultured bacterium
New,CleanUp,ReferenceOTU630968	0	0	0	0	0	0	0	2.66626e-05	0	0	0	0	0	0	Unassigned
New,CleanUp,ReferenceOTU436001	0	0	0	0	0	0	0	2.66626e-05	0	0	0	0	0	0	Unassigned
New,CleanUp,ReferenceOTU371837	0	0	0	0	0	0	0	2.66626e-05	0	0	0	0	0	0	Bacteria; Proteobacteria; Epsilonproteobacteria; Nautiliales; Nautiliaceae; uncultured
New,CleanUp,ReferenceOTU1025208	0	0	0	0	0	0	0	2.66626e-05	0	0	0	0	0	0	Unassigned
New,CleanUp,ReferenceOTU759304	0	0	0	0	0	0	0	2.66626e-05	0	0	0	0	0	0	Bacteria; Proteobacteria; Epsilonproteobacteria; Campylobacterales; Helicobacteraceae; Sulfurimonas; uncultured bacterium
New,CleanUp,ReferenceOTU509728	0	0	0	0	0	0	0	2.66626e-05	0	0	0	0	0	0	Unassigned
New,CleanUp,ReferenceOTU868398	0	0	0	0	0	0	0	2.66626e-05	0	0	0	0	0	0	Unassigned
New,CleanUp,ReferenceOTU1083159	0	0	0	0	0	0	0	2.66626e-05	0	0	0	0	0	0	Unassigned
New,CleanUp,ReferenceOTU971210	0	0	0	0	0	0	0	2.66626e-05	0	0	0	0	0	0	Bacteria; Proteobacteria; Deltaproteobacteria; Desulfurellales; Desulfurellaceae; Hippea; uncultured delta proteobacterium
New,CleanUp,ReferenceOTU643519	0	0	0	0	0	2.34629e-05	0	3.13678e-06	0	0	0	0	0	0	Bacteria; Proteobacteria; Epsilonproteobacteria; Campylobacterales; Helicobacteraceae; Sulfurovum; uncultured epsilon proteobacterium
New,CleanUp,ReferenceOTU174984	0	0	0	0	0	2.34629e-05	0	3.13678e-06	0	0	0	0	0	0	Bacteria; Proteobacteria; Epsilonproteobacteria; Nautiliales; Nautiliaceae
New,CleanUp,ReferenceOTU1059524	0	0	0	0	0	2.34629e-05	0	3.13678e-06	0	0	0	0	0	0	Bacteria; Proteobacteria; Epsilonproteobacteria; Campylobacterales; Helicobacteraceae; Sulfurovum; uncultured epsilon proteobacterium
New,CleanUp,ReferenceOTU846264	0	0	0	0	0	1.73422e-05	0	0	0	9.21693e-06	0	0	0	0	Bacteria; Lentisphaerae; Oligosphaeria; Oligosphaerales; uncultured organism; uncultured organism; uncultured organism
New,CleanUp,ReferenceOTU1043952	1.47077e-06	0	0	0	0	8.16103e-06	1.18793e-05	0	4.99255e-06	0	0	0	0	0	Bacteria; Proteobacteria; Epsilonproteobacteria; Campylobacterales; Campylobacteraceae; Arcobacter; uncultured epsilon proteobacterium
EU776140,1,1362	0	1.89906e-05	0	4.90619e-06	0	1.02013e-06	0	1.56839e-06	0	0	0	0	0	0	Bacteria; Proteobacteria; Gammaproteobacteria; Pseudomonadales; Moraxellaceae; Acinetobacter
New,CleanUp,ReferenceOTU511986	0	0	0	0	0	0	0	3.13678e-06	2.32986e-05	0	0	0	0	0	Bacteria; Proteobacteria; Epsilonproteobacteria; Campylobacterales; Helicobacteraceae; Sulfurimonas; uncultured bacterium
New,CleanUp,ReferenceOTU859424	0	0	0	0	0	0	1.31993e-06	2.50942e-05	0	0	0	0	0	0	Bacteria; Proteobacteria; Epsilonproteobacteria; Campylobacterales; Helicobacteraceae; Sulfurimonas; uncultured bacterium
New,CleanUp,ReferenceOTU670898	0	0	0	0	0	0	1.31993e-06	2.50942e-05	0	0	0	0	0	0	Bacteria; Proteobacteria; Epsilonproteobacteria; Campylobacterales; Campylobacteraceae; Arcobacter; uncultured bacterium
New,CleanUp,ReferenceOTU139376	0	0	0	0	0	1.22415e-05	0	1.41155e-05	0	0	0	0	0	0	Bacteria; Proteobacteria; Epsilonproteobacteria; Nautiliales; Nautiliaceae; Caminibacter
New,CleanUp,ReferenceOTU463418	0	0	0	0	0	0	0	4.70517e-06	2.16344e-05	0	0	0	0	0	Bacteria; Proteobacteria; Epsilonproteobacteria; Campylobacterales; Helicobacteraceae; Sulfurimonas
New,CleanUp,ReferenceOTU832735	0	0	0	0	0	7.1409e-06	1.58391e-05	0	3.32837e-06	0	0	0	0	0	Bacteria; Proteobacteria; Epsilonproteobacteria; Campylobacterales; Helicobacteraceae; Sulfurovum; uncultured epsilon proteobacterium
New,CleanUp,ReferenceOTU985445	0	0	0	0	0	1.83623e-05	0	7.84194e-06	0	0	0	0	0	0	Bacteria; Proteobacteria; Epsilonproteobacteria; Campylobacterales; Helicobacteraceae; Sulfurimonas; uncultured bacterium
New,CleanUp,ReferenceOTU549002	0	0	0	0	0	1.02013e-06	0	2.50942e-05	0	0	0	0	0	0	Unassigned
New,CleanUp,ReferenceOTU934508	0	0	0	0	0	2.44831e-05	0	1.56839e-06	0	0	0	0	0	0	Bacteria; Proteobacteria; Epsilonproteobacteria; Nautiliales; Nautiliaceae; Caminibacter
New,CleanUp,ReferenceOTU751356	0	0	0	0	0	1.63221e-05	0	7.84194e-06	0	1.84339e-06	0	0	0	0	Bacteria; Proteobacteria; Epsilonproteobacteria; Campylobacterales; Helicobacteraceae; Sulfurovum; uncultured epsilon proteobacterium
New,CleanUp,ReferenceOTU380844	0	0	1.11378e-06	0	0	1.22415e-05	2.63985e-06	3.13678e-06	4.99255e-06	1.84339e-06	0	0	0	0	Bacteria; BD1-5; uncultured bacterium; uncultured bacterium; uncultured bacterium; uncultured bacterium; uncultured bacterium
New,CleanUp,ReferenceOTU944368	0	0	0	0	0	1.02013e-05	7.91956e-06	7.84194e-06	0	0	0	0	0	0	Bacteria; Proteobacteria; Epsilonproteobacteria; Campylobacterales; Helicobacteraceae; Sulfurimonas
New,CleanUp,ReferenceOTU10400	0	0	0	0	0	7.1409e-06	0	1.88207e-05	0	0	0	0	0	0	Bacteria; Proteobacteria; Gammaproteobacteria; Thiotrichales; Piscirickettsiaceae; Thiomicrospira; uncultured gamma proteobacterium
New,CleanUp,ReferenceOTU476847	0	0	0	0	0	0	0	1.09787e-05	1.49777e-05	0	0	0	0	0	Bacteria; Proteobacteria; Epsilonproteobacteria; Campylobacterales; Helicobacteraceae; Sulfurimonas; bacterium enrichment culture clone 16S-9
New,CleanUp,ReferenceOTU831997	0	0	0	0	0	1.02013e-05	0	1.56839e-05	0	0	0	0	0	0	Bacteria; Proteobacteria; Epsilonproteobacteria; Nautiliales; Nautiliaceae; Nitratifractor; uncultured bacterium
New,CleanUp,ReferenceOTU122552	0	0	0	0	0	1.63221e-05	7.91956e-06	1.56839e-06	0	0	0	0	0	0	Bacteria; Proteobacteria; Epsilonproteobacteria; Campylobacterales; Helicobacteraceae; Sulfurimonas; uncultured epsilon proteobacterium
New,CleanUp,ReferenceOTU61874	0	0	0	0	0	0	0	0	0	2.58074e-05	0	0	0	0	Bacteria; Proteobacteria; Epsilonproteobacteria; Nautiliales; Nautiliaceae; Nitratifractor; uncultured bacterium
New,CleanUp,ReferenceOTU780484	0	0	0	0	0	0	0	0	0	2.58074e-05	0	0	0	0	Bacteria; Aquificae; Aquificae; Aquificales; Desulfurobacteriaceae; Desulfurobacterium
New,ReferenceOTU414	0	0	0	0	0	0	0	0	0	2.58074e-05	0	0	0	0	Unassigned
New,CleanUp,ReferenceOTU442298	0	0	0	0	0	0	0	0	0	2.58074e-05	0	0	0	0	Bacteria; Aquificae; Aquificae; Aquificales; Desulfurobacteriaceae; Desulfurobacterium
New,CleanUp,ReferenceOTU29251	0	0	0	0	0	0	0	0	0	2.58074e-05	0	0	0	0	Bacteria; Proteobacteria; Epsilonproteobacteria; Nautiliales; Nautiliaceae; Nitratifractor; uncultured bacterium
New,CleanUp,ReferenceOTU435459	0	0	0	0	0	0	0	0	0	2.58074e-05	0	0	0	0	Bacteria; Aquificae; Aquificae; Aquificales; Desulfurobacteriaceae; Desulfurobacterium
New,CleanUp,ReferenceOTU1067247	0	0	0	0	0	0	0	0	0	2.58074e-05	0	0	0	0	Bacteria; Proteobacteria; Epsilonproteobacteria; Nautiliales; Nautiliaceae; Nitratifractor; uncultured bacterium
New,CleanUp,ReferenceOTU917324	0	0	0	0	0	0	0	0	0	2.58074e-05	0	0	0	0	Archaea; Euryarchaeota; Methanococci; Methanococcales; Methanococcaceae; uncultured
New,CleanUp,ReferenceOTU640995	0	0	0	0	0	0	0	0	0	2.58074e-05	0	0	0	0	Archaea; Nanoarchaeota; Nanoarchaeota Incertae Sedis; Unknown Order; Unknown Family; Nanoarchaeum; uncultured nanoarchaeote
New,CleanUp,ReferenceOTU370766	0	0	0	0	0	0	0	0	0	2.58074e-05	0	0	0	0	Bacteria; Aquificae; Aquificae; Aquificales; Desulfurobacteriaceae; Desulfurobacterium
New,CleanUp,ReferenceOTU372317	0	0	0	0	0	0	0	0	0	2.58074e-05	0	0	0	0	Bacteria; Proteobacteria; Epsilonproteobacteria; Nautiliales; Nautiliaceae; Nitratifractor; uncultured bacterium
New,CleanUp,ReferenceOTU1030005	0	0	0	0	0	0	0	0	0	2.58074e-05	0	0	0	0	Bacteria; Aquificae; Aquificae; Aquificales; Desulfurobacteriaceae; Desulfurobacterium
New,CleanUp,ReferenceOTU983605	0	0	0	0	0	0	0	0	0	2.58074e-05	0	0	0	0	Bacteria; Proteobacteria; Epsilonproteobacteria; Nautiliales; Nautiliaceae; Nitratifractor; uncultured bacterium
New,CleanUp,ReferenceOTU43399	0	0	0	0	0	1.63221e-05	0	9.41033e-06	0	0	0	0	0	0	Bacteria; Proteobacteria; Epsilonproteobacteria; Campylobacterales; Helicobacteraceae; Sulfurimonas
New,CleanUp,ReferenceOTU164633	0	0	0	0	0	1.02013e-05	1.31993e-06	1.41155e-05	0	0	0	0	0	0	Bacteria; Proteobacteria; Epsilonproteobacteria; Nautiliales; Nautiliaceae; Nitratifractor
New,ReferenceOTU162	0	0	5.56888e-06	0	0	8.16103e-06	3.95978e-06	6.27356e-06	1.66418e-06	0	0	0	0	0	Bacteria; Proteobacteria; Epsilonproteobacteria; Campylobacterales; Helicobacteraceae; Sulfurovum; uncultured bacterium
New,CleanUp,ReferenceOTU1144462	0	0	2.22755e-06	0	0	6.12077e-06	0	1.72523e-05	0	0	0	0	0	0	Bacteria; Proteobacteria; Epsilonproteobacteria; Campylobacterales; Helicobacteraceae; Sulfurimonas
New,CleanUp,ReferenceOTU414234	0	0	0	0	0	2.04026e-06	0	2.35258e-05	0	0	0	0	0	0	Bacteria; Proteobacteria; Deltaproteobacteria; Desulfobacterales; Desulfobulbaceae; Desulfobulbus; uncultured bacterium
New,CleanUp,ReferenceOTU1091656	0	0	0	0	0	0	5.27971e-06	0	0	2.02772e-05	0	0	0	0	Unassigned
New,CleanUp,ReferenceOTU1104232	0	0	0	0	0	1.12214e-05	0	1.09787e-05	3.32837e-06	0	0	0	0	0	Bacteria; Proteobacteria; Epsilonproteobacteria; Campylobacterales; Helicobacteraceae; Sulfurovum; uncultured bacterium
New,CleanUp,ReferenceOTU72644	0	0	0	0	0	5.10064e-06	0	2.03891e-05	0	0	0	0	0	0	Bacteria; Proteobacteria; Epsilonproteobacteria; Campylobacterales; Helicobacteraceae; Sulfurovum; uncultured bacterium
New,ReferenceOTU1031	0	0	0	0	0	0	0	2.03891e-05	4.99255e-06	0	0	0	0	0	Bacteria; Deinococcus-Thermus; Deinococci; Thermales; Thermaceae; Oceanithermus; uncultured bacterium
New,CleanUp,ReferenceOTU1098635	0	0	0	0	0	1.73422e-05	0	4.70517e-06	3.32837e-06	0	0	0	0	0	Bacteria; Proteobacteria; Epsilonproteobacteria; Nautiliales; Nautiliaceae; Lebetimonas
New,CleanUp,ReferenceOTU1004786	0	0	0	0	0	2.04026e-06	1.31993e-06	2.19574e-05	0	0	0	0	0	0	Bacteria; Proteobacteria; Epsilonproteobacteria; Campylobacterales; Helicobacteraceae; Sulfurimonas; uncultured bacterium
New,CleanUp,ReferenceOTU112053	0	0	0	0	0	1.53019e-05	0	0	9.98511e-06	0	0	0	0	0	Bacteria; Proteobacteria; Epsilonproteobacteria; Nautiliales; Nautiliaceae; Nitratiruptor
New,CleanUp,ReferenceOTU394061	0	0	0	0	0	0	0	2.19574e-05	3.32837e-06	0	0	0	0	0	Unassigned
New,CleanUp,ReferenceOTU93412	0	0	0	0	0	0	1.31993e-06	0	0	2.3964e-05	0	0	0	0	Bacteria; Aquificae; Aquificae; Aquificales; Desulfurobacteriaceae; Desulfurobacterium
New,CleanUp,ReferenceOTU493187	0	0	0	0	0	0	1.31993e-06	0	0	2.3964e-05	0	0	0	0	Bacteria; Thermodesulfobacteria; Thermodesulfobacteria; Thermodesulfobacteriales; Thermodesulfobacteriaceae; Thermodesulfatator
New,CleanUp,ReferenceOTU108201	0	0	0	0	0	1.42818e-05	0	1.09787e-05	0	0	0	0	0	0	Bacteria; Proteobacteria; Epsilonproteobacteria; Nautiliales; Nautiliaceae; Nitratifractor; uncultured bacterium
New,CleanUp,ReferenceOTU17775	0	0	0	0	0	1.12214e-05	1.31993e-06	1.09787e-05	1.66418e-06	0	0	0	0	0	Bacteria; Proteobacteria; Epsilonproteobacteria; Campylobacterales; Helicobacteraceae; Sulfurovum
New,CleanUp,ReferenceOTU413132	0	0	0	0	0	1.02013e-05	0	0	1.49777e-05	0	0	0	0	0	Bacteria; Aquificae; Aquificae; Aquificales; Desulfurobacteriaceae; Thermovibrio
New,CleanUp,ReferenceOTU486958	0	0	0	0	0	2.04026e-06	0	3.13678e-06	1.99702e-05	0	0	0	0	0	Bacteria; Proteobacteria; Epsilonproteobacteria; Campylobacterales; Helicobacteraceae; Sulfurimonas; uncultured epsilon proteobacterium
New,CleanUp,ReferenceOTU943594	0	0	0	0	0	2.04026e-05	0	4.70517e-06	0	0	0	0	0	0	Bacteria; Proteobacteria; Epsilonproteobacteria; Campylobacterales; Helicobacteraceae; Sulfurovum; uncultured epsilon proteobacterium
New,CleanUp,ReferenceOTU503643	0	0	0	0	0	0	0	2.50942e-05	0	0	0	0	0	0	Unassigned
New,CleanUp,ReferenceOTU906510	0	0	0	0	0	0	0	2.50942e-05	0	0	0	0	0	0	Unassigned
New,CleanUp,ReferenceOTU867551	0	0	0	0	0	0	0	2.50942e-05	0	0	0	0	0	0	Unassigned
New,CleanUp,ReferenceOTU226615	0	0	0	0	0	0	0	2.50942e-05	0	0	0	0	0	0	Bacteria; Bacteroidetes; Flavobacteriia; Flavobacteriales; R103-B20; uncultured bacterium; uncultured bacterium
New,CleanUp,ReferenceOTU736507	0	0	0	0	0	0	0	2.50942e-05	0	0	0	0	0	0	Unassigned
New,CleanUp,ReferenceOTU730913	0	0	0	0	0	0	0	2.50942e-05	0	0	0	0	0	0	Bacteria; Proteobacteria; Gammaproteobacteria; Thiotrichales; Piscirickettsiaceae; Thiomicrospira; uncultured gamma proteobacterium
New,CleanUp,ReferenceOTU357710	0	0	0	0	0	0	0	2.50942e-05	0	0	0	0	0	0	Bacteria; Proteobacteria; Epsilonproteobacteria; Campylobacterales; Helicobacteraceae; Sulfurovum; uncultured epsilon proteobacterium
New,ReferenceOTU375	0	0	0	0	0	0	0	2.50942e-05	0	0	0	0	0	0	Bacteria; Bacteroidetes; Flavobacteriia; Flavobacteriales; R103-B20; uncultured bacterium; uncultured bacterium
New,CleanUp,ReferenceOTU306722	0	0	0	0	0	0	0	2.50942e-05	0	0	0	0	0	0	Unassigned
New,CleanUp,ReferenceOTU836419	0	0	0	0	0	0	0	2.50942e-05	0	0	0	0	0	0	Bacteria; Proteobacteria; Deltaproteobacteria; Desulfurellales; Desulfurellaceae; Hippea; uncultured delta proteobacterium
New,CleanUp,ReferenceOTU343292	0	0	0	0	0	0	0	2.50942e-05	0	0	0	0	0	0	Bacteria; Proteobacteria; Epsilonproteobacteria; Campylobacterales; Helicobacteraceae; Sulfurimonas; uncultured bacterium
New,CleanUp,ReferenceOTU276849	0	0	0	0	0	0	0	2.50942e-05	0	0	0	0	0	0	Bacteria; Proteobacteria; Deltaproteobacteria; Desulfurellales; Desulfurellaceae; Hippea; uncultured delta proteobacterium
New,CleanUp,ReferenceOTU462608	0	0	0	0	0	0	0	3.13678e-06	1.66418e-06	2.02772e-05	0	0	0	0	Bacteria; BHI80-139
New,CleanUp,ReferenceOTU718708	0	0	0	0	0	4.08051e-06	0	1.09787e-05	9.98511e-06	0	0	0	0	0	Bacteria; Proteobacteria; Epsilonproteobacteria; Nautiliales; Nautiliaceae; Thioreductor
New,CleanUp,ReferenceOTU609943	0	0	0	0	0	2.34629e-05	0	1.56839e-06	0	0	0	0	0	0	Bacteria; Proteobacteria; Epsilonproteobacteria; Campylobacterales; Helicobacteraceae; Sulfurovum
New,CleanUp,ReferenceOTU1046265	0	0	0	0	0	2.34629e-05	0	1.56839e-06	0	0	0	0	0	0	Bacteria; Proteobacteria; Epsilonproteobacteria; Nautiliales; Nautiliaceae; Nitratifractor
New,CleanUp,ReferenceOTU480638	0	0	0	0	0	2.34629e-05	0	1.56839e-06	0	0	0	0	0	0	Bacteria; Proteobacteria; Epsilonproteobacteria; Campylobacterales; Helicobacteraceae; Sulfurovum; uncultured bacterium
New,CleanUp,ReferenceOTU439378	0	0	0	0	0	3.06038e-06	0	2.19574e-05	0	0	0	0	0	0	Unassigned
New,CleanUp,ReferenceOTU496005	0	0	0	0	0	3.06038e-06	0	2.19574e-05	0	0	0	0	0	0	Unassigned
New,CleanUp,ReferenceOTU255197	0	0	0	0	0	3.06038e-06	0	2.19574e-05	0	0	0	0	0	0	Unassigned
New,CleanUp,ReferenceOTU39661	0	0	0	0	0	1.02013e-06	0	9.41033e-06	1.66418e-06	1.29037e-05	0	0	0	0	Bacteria; BHI80-139
New,CleanUp,ReferenceOTU234187	0	0	0	0	0	1.63221e-05	3.95978e-06	4.70517e-06	0	0	0	0	0	0	Bacteria; Proteobacteria; Epsilonproteobacteria; Campylobacterales; Campylobacteraceae; Campylobacter; uncultured bacterium
New,CleanUp,ReferenceOTU771261	0	0	0	0	0	1.02013e-06	0	0	0	2.3964e-05	0	0	0	0	Archaea; Nanoarchaeota; Nanoarchaeota Incertae Sedis; Unknown Order; Unknown Family; Nanoarchaeum; uncultured nanoarchaeote
New,CleanUp,ReferenceOTU170056	0	0	0	0	0	0	0	0	2.49628e-05	0	0	0	0	0	Unassigned
New,CleanUp,ReferenceOTU931948	0	0	0	0	0	0	0	0	2.49628e-05	0	0	0	0	0	Unassigned
New,CleanUp,ReferenceOTU1147662	0	0	0	0	0	0	0	0	2.49628e-05	0	0	0	0	0	Bacteria; Proteobacteria; Epsilonproteobacteria; Campylobacterales; Helicobacteraceae; Sulfurimonas; uncultured bacterium
New,CleanUp,ReferenceOTU570295	0	0	0	0	0	0	0	0	2.49628e-05	0	0	0	0	0	Bacteria; Proteobacteria; Epsilonproteobacteria; Campylobacterales; Helicobacteraceae; Sulfurimonas; uncultured bacterium
New,CleanUp,ReferenceOTU863128	0	0	0	0	0	0	0	0	2.49628e-05	0	0	0	0	0	Bacteria; Proteobacteria; Epsilonproteobacteria; Campylobacterales; Helicobacteraceae; Sulfurimonas; uncultured bacterium
New,CleanUp,ReferenceOTU1055907	0	0	0	0	0	1.02013e-06	0	1.72523e-05	6.65674e-06	0	0	0	0	0	Bacteria; BHI80-139
New,CleanUp,ReferenceOTU547525	0	0	0	0	0	0	1.31993e-06	0	3.32837e-06	2.02772e-05	0	0	0	0	Archaea; Crenarchaeota; Thermoprotei; Thermoproteales; Thermoproteaceae; uncultured; uncultured archaeon
New,CleanUp,ReferenceOTU626149	0	0	0	0	0	0	0	1.56839e-06	2.32986e-05	0	0	0	0	0	Bacteria; Proteobacteria; Epsilonproteobacteria; Campylobacterales; Helicobacteraceae; Sulfurimonas; uncultured bacterium
New,CleanUp,ReferenceOTU100922	0	0	0	0	0	0	0	1.56839e-06	2.32986e-05	0	0	0	0	0	Bacteria; Proteobacteria; Epsilonproteobacteria; Campylobacterales; Helicobacteraceae; Sulfurimonas; uncultured bacterium
New,ReferenceOTU1772	0	0	0	0	0	0	0	1.56839e-06	2.32986e-05	0	0	0	0	0	Bacteria; Proteobacteria; Epsilonproteobacteria; Campylobacterales; Helicobacteraceae; Sulfurimonas; uncultured bacterium
New,CleanUp,ReferenceOTU428122	0	0	0	0	0	2.04026e-05	1.31993e-06	3.13678e-06	0	0	0	0	0	0	Bacteria; Proteobacteria; Epsilonproteobacteria; Campylobacterales; Helicobacteraceae; Sulfurovum; uncultured bacterium
New,CleanUp,ReferenceOTU828492	0	0	0	0	0	1.02013e-06	0	1.88207e-05	4.99255e-06	0	0	0	0	0	Bacteria; Proteobacteria; Epsilonproteobacteria; Campylobacterales; Campylobacteraceae; Sulfurospirillum; uncultured bacterium
New,CleanUp,ReferenceOTU573671	0	0	0	0	0	1.53019e-05	7.91956e-06	1.56839e-06	0	0	0	0	0	0	Bacteria; Proteobacteria; Epsilonproteobacteria; Campylobacterales; Helicobacteraceae; Sulfurimonas; uncultured bacterium
New,CleanUp,ReferenceOTU513562	0	0	0	0	0	4.08051e-06	0	1.56839e-05	4.99255e-06	0	0	0	0	0	Bacteria; BHI80-139
New,CleanUp,ReferenceOTU376843	0	0	0	0	0	8.16103e-06	0	0	0	1.65905e-05	0	0	0	0	Bacteria; Proteobacteria; Deltaproteobacteria; Desulfobacterales; Desulfobacteraceae; uncultured; uncultured organism
New,CleanUp,ReferenceOTU72150	0	0	0	0	0	8.16103e-06	0	0	0	1.65905e-05	0	0	0	0	Bacteria; Thermotogae; Thermotogae; Thermotogales; Thermotogaceae; Thermotoga
New,CleanUp,ReferenceOTU1034673	0	0	4.4551e-06	0	0	0	0	0	0	2.02772e-05	0	0	0	0	Bacteria; Aquificae; Aquificae; Aquificales; Desulfurobacteriaceae; Desulfurobacterium; Desulfurobacterium thermolithotrophum DSM 11699
New,CleanUp,ReferenceOTU179165	0	0	0	0	0	4.08051e-06	0	1.72523e-05	3.32837e-06	0	0	0	0	0	Bacteria; Proteobacteria; Epsilonproteobacteria; Nautiliales; Nautiliaceae; Thioreductor
New,CleanUp,ReferenceOTU1102343	0	0	0	0	0	2.04026e-05	2.63985e-06	1.56839e-06	0	0	0	0	0	0	Bacteria; Proteobacteria; Epsilonproteobacteria; Campylobacterales; Campylobacteraceae; Arcobacter; uncultured epsilon proteobacterium
New,CleanUp,ReferenceOTU215050	0	0	0	0	0	0	2.63985e-06	2.19574e-05	0	0	0	0	0	0	Bacteria; Proteobacteria; Epsilonproteobacteria; Nautiliales; Nautiliaceae; Nitratifractor; uncultured bacterium
New,CleanUp,ReferenceOTU272997	0	0	0	0	0	0	0	6.27356e-06	1.8306e-05	0	0	0	0	0	Bacteria; Proteobacteria; Epsilonproteobacteria; Campylobacterales; Campylobacteraceae; Thiofractor; uncultured bacterium
New,CleanUp,ReferenceOTU773693	0	0	0	0	0	2.14227e-05	0	3.13678e-06	0	0	0	0	0	0	Bacteria; Proteobacteria; Epsilonproteobacteria; Nautiliales; Nautiliaceae; Caminibacter; uncultured bacterium
New,CleanUp,ReferenceOTU48752	0	0	0	0	0	1.02013e-06	0	2.35258e-05	0	0	0	0	0	0	Bacteria; Proteobacteria; Epsilonproteobacteria; Campylobacterales; Helicobacteraceae; Sulfurimonas; uncultured bacterium
New,CleanUp,ReferenceOTU545149	0	0	0	0	0	1.02013e-06	0	2.35258e-05	0	0	0	0	0	0	Unassigned
New,ReferenceOTU1788	0	0	0	0	0	1.02013e-06	0	2.35258e-05	0	0	0	0	0	0	Bacteria; Proteobacteria; Deltaproteobacteria; Desulfobacterales; Desulfobulbaceae; Desulfobulbus; uncultured delta proteobacterium
New,CleanUp,ReferenceOTU359587	0	0	0	0	0	1.02013e-06	0	2.35258e-05	0	0	0	0	0	0	Unassigned
New,CleanUp,ReferenceOTU162768	0	0	0	0	0	1.02013e-06	0	2.35258e-05	0	0	0	0	0	0	Bacteria; Proteobacteria; Epsilonproteobacteria; Nautiliales; Nautiliaceae; Nitratifractor; uncultured bacterium
JN662166,1,1404	0	0	0	0	0	1.22415e-05	1.31993e-06	1.09787e-05	0	0	0	0	0	0	Bacteria; Proteobacteria; Epsilonproteobacteria; Campylobacterales; Helicobacteraceae; Sulfurovum
New,CleanUp,ReferenceOTU448751	0	0	0	0	0	2.04026e-06	0	1.41155e-05	8.32092e-06	0	0	0	0	0	Bacteria; Proteobacteria; Epsilonproteobacteria; Campylobacterales; Helicobacteraceae; Sulfurimonas; uncultured bacterium
New,CleanUp,ReferenceOTU607146	0	0	0	0	0	1.63221e-05	0	3.13678e-06	4.99255e-06	0	0	0	0	0	Bacteria; Proteobacteria; Epsilonproteobacteria; Nautiliales; Nautiliaceae; Thioreductor
New,CleanUp,ReferenceOTU405103	0	0	0	0	0	4.08051e-06	1.7159e-05	3.13678e-06	0	0	0	0	0	0	Bacteria; Proteobacteria; Epsilonproteobacteria; Campylobacterales; Helicobacteraceae; Sulfurimonas; uncultured bacterium
New,CleanUp,ReferenceOTU659018	0	0	0	0	0	1.32617e-05	0	9.41033e-06	1.66418e-06	0	0	0	0	0	Bacteria; Proteobacteria; Epsilonproteobacteria; Nautiliales; Nautiliaceae; Caminibacter
New,CleanUp,ReferenceOTU215649	0	0	0	0	0	3.06038e-06	0	6.27356e-06	1.49777e-05	0	0	0	0	0	Archaea; Euryarchaeota; Archaeoglobi; Archaeoglobales; Archaeoglobaceae; uncultured; uncultured archaeon
New,CleanUp,ReferenceOTU158250	0	0	0	0	0	2.04026e-06	0	1.72523e-05	4.99255e-06	0	0	0	0	0	Bacteria; Proteobacteria; Epsilonproteobacteria; Campylobacterales; Helicobacteraceae; Sulfurovum; uncultured bacterium
New,CleanUp,ReferenceOTU481906	0	0	0	0	0	0	1.31993e-06	6.27356e-06	1.66418e-05	0	0	0	0	0	Bacteria; Proteobacteria; Epsilonproteobacteria; Campylobacterales; Helicobacteraceae; Sulfurimonas; uncultured bacterium
New,CleanUp,ReferenceOTU1051799	0	0	1.11378e-06	0	0	7.1409e-06	2.63985e-06	0	1.33135e-05	0	0	0	0	0	Bacteria; Proteobacteria; Epsilonproteobacteria; Campylobacterales; Helicobacteraceae; Sulfurovum
New,CleanUp,ReferenceOTU941038	0	0	0	0	0	0	0	1.25471e-05	1.16493e-05	0	0	0	0	0	Bacteria; Proteobacteria; Epsilonproteobacteria; Campylobacterales; Helicobacteraceae
New,CleanUp,ReferenceOTU798021	0	0	0	0	0	1.63221e-05	0	7.84194e-06	0	0	0	0	0	0	Bacteria; Proteobacteria; Epsilonproteobacteria; Nautiliales; Nautiliaceae; Caminibacter
New,CleanUp,ReferenceOTU446016	0	0	0	0	0	1.02013e-05	3.95978e-06	0	9.98511e-06	0	0	0	0	0	Bacteria; Proteobacteria; Epsilonproteobacteria; Campylobacterales; Helicobacteraceae; Sulfurovum; uncultured epsilon proteobacterium
New,CleanUp,ReferenceOTU5412	0	0	0	0	0	3.06038e-06	2.63985e-06	0	0	1.84339e-05	0	0	0	0	Bacteria; Aquificae; Aquificae; Aquificales; Desulfurobacteriaceae; Desulfurobacterium
New,CleanUp,ReferenceOTU396981	0	0	0	0	0	0	0	2.03891e-05	0	3.68677e-06	0	0	0	0	Bacteria; Proteobacteria; Deltaproteobacteria; Desulfobacterales; Desulfobulbaceae; Desulfobulbus; uncultured bacterium
New,CleanUp,ReferenceOTU392571	0	0	0	0	0	1.12214e-05	0	1.09787e-05	0	1.84339e-06	0	0	0	0	Bacteria; Proteobacteria; Epsilonproteobacteria; Campylobacterales; Helicobacteraceae; Sulfurovum; uncultured bacterium
New,CleanUp,ReferenceOTU65295	0	0	0	0	0	3.06038e-06	0	1.09787e-05	9.98511e-06	0	0	0	0	0	Bacteria; Proteobacteria; Epsilonproteobacteria; Campylobacterales; Campylobacteraceae; Sulfurospirillum; uncultured bacterium
New,CleanUp,ReferenceOTU195123	0	0	0	0	0	2.24428e-05	0	1.56839e-06	0	0	0	0	0	0	Bacteria; Proteobacteria; Epsilonproteobacteria; Nautiliales; Nautiliaceae; Caminibacter
New,CleanUp,ReferenceOTU275368	0	0	0	0	0	1.73422e-05	0	0	6.65674e-06	0	0	0	0	0	Bacteria; Proteobacteria; Epsilonproteobacteria; Campylobacterales; Helicobacteraceae; Sulfurimonas
New,CleanUp,ReferenceOTU381079	0	0	0	0	0	2.04026e-06	0	2.19574e-05	0	0	0	0	0	0	Unassigned
New,CleanUp,ReferenceOTU1132492	0	0	0	0	0	9.18115e-06	0	3.13678e-06	1.16493e-05	0	0	0	0	0	Bacteria; Proteobacteria; Epsilonproteobacteria; Nautiliales; Nautiliaceae
New,CleanUp,ReferenceOTU166673	0	0	0	0	0	0	0	0	0	2.3964e-05	0	0	0	0	Unassigned
New,CleanUp,ReferenceOTU737223	0	0	0	0	0	0	0	0	0	2.3964e-05	0	0	0	0	Bacteria; Proteobacteria; Epsilonproteobacteria; Nautiliales; Nautiliaceae; Nitratifractor; uncultured bacterium
New,CleanUp,ReferenceOTU178963	0	0	0	0	0	0	0	0	0	2.3964e-05	0	0	0	0	Bacteria; Aquificae; Aquificae; Aquificales; Desulfurobacteriaceae
New,CleanUp,ReferenceOTU344824	0	0	0	0	0	0	0	0	0	2.3964e-05	0	0	0	0	Unassigned
New,CleanUp,ReferenceOTU72761	0	0	0	0	0	0	0	0	0	2.3964e-05	0	0	0	0	Bacteria; Aquificae; Aquificae; Aquificales; Desulfurobacteriaceae; Desulfurobacterium
DQ366691,1,1269	0	0	0	0	0	0	0	0	0	2.3964e-05	0	0	0	0	Bacteria; Bacteroidetes; Bacteroidia; Bacteroidales; Prevotellaceae; Alloprevotella
New,ReferenceOTU95	0	0	0	0	0	0	0	0	0	2.3964e-05	0	0	0	0	Bacteria; Candidate division OP8; uncultured bacterium; uncultured bacterium; uncultured bacterium; uncultured bacterium; uncultured bacterium
New,CleanUp,ReferenceOTU1037510	0	0	0	0	0	0	0	0	0	2.3964e-05	0	0	0	0	Archaea; Crenarchaeota; Thermoprotei; Desulfurococcales; Pyrodictiaceae; uncultured
New,CleanUp,ReferenceOTU686817	0	0	0	0	0	0	0	0	0	2.3964e-05	0	0	0	0	Unassigned
New,CleanUp,ReferenceOTU743628	0	0	0	0	0	5.10064e-06	0	1.88207e-05	0	0	0	0	0	0	Bacteria; Proteobacteria; Epsilonproteobacteria; Campylobacterales; Helicobacteraceae; Sulfurimonas; uncultured bacterium
New,CleanUp,ReferenceOTU961039	0	0	0	0	0	2.04026e-05	0	0	1.66418e-06	1.84339e-06	0	0	0	0	Bacteria; Proteobacteria; Epsilonproteobacteria; Nautiliales; Nautiliaceae; Caminibacter
New,CleanUp,ReferenceOTU189398	0	0	0	0	0	0	0	1.72523e-05	6.65674e-06	0	0	0	0	0	Bacteria; Proteobacteria; Epsilonproteobacteria; Campylobacterales; Helicobacteraceae; Sulfurimonas
New,CleanUp,ReferenceOTU709319	0	0	0	0	0	1.93824e-05	1.31993e-06	3.13678e-06	0	0	0	0	0	0	Unassigned
New,CleanUp,ReferenceOTU328285	0	0	0	0	0	6.12077e-06	0	1.09787e-05	6.65674e-06	0	0	0	0	0	Bacteria; Aquificae; Aquificae; Aquificales; Desulfurobacteriaceae; Thermovibrio
New,CleanUp,ReferenceOTU772898	0	0	0	0	0	7.1409e-06	0	0	0	1.65905e-05	0	0	0	0	Unassigned
New,CleanUp,ReferenceOTU182095	0	0	0	0	0	0	0	2.03891e-05	3.32837e-06	0	0	0	0	0	Unassigned
New,CleanUp,ReferenceOTU1041686	0	0	0	0	0	0	0	2.03891e-05	3.32837e-06	0	0	0	0	0	Bacteria; Proteobacteria; Epsilonproteobacteria; Campylobacterales; Helicobacteraceae; Sulfurimonas; uncultured bacterium
New,CleanUp,ReferenceOTU72458	0	0	0	0	0	0	0	2.03891e-05	3.32837e-06	0	0	0	0	0	Unassigned
New,CleanUp,ReferenceOTU323628	0	0	0	0	0	1.42818e-05	0	9.41033e-06	0	0	0	0	0	0	Bacteria; Proteobacteria; Epsilonproteobacteria; Nautiliales; Nautiliaceae; Caminibacter; uncultured bacterium
New,CleanUp,ReferenceOTU1033703	0	0	0	0	0	7.1409e-06	0	1.09787e-05	0	5.53016e-06	0	0	0	0	Bacteria; Proteobacteria; Epsilonproteobacteria; Campylobacterales; Helicobacteraceae; Sulfurovum; uncultured bacterium
New,CleanUp,ReferenceOTU877106	0	0	0	0	0	1.42818e-05	2.63985e-06	0	6.65674e-06	0	0	0	0	0	Bacteria; Proteobacteria; Epsilonproteobacteria; Campylobacterales; Helicobacteraceae; Sulfurimonas
New,CleanUp,ReferenceOTU391788	0	0	0	0	0	2.04026e-05	0	3.13678e-06	0	0	0	0	0	0	Unassigned
New,CleanUp,ReferenceOTU818535	0	0	0	0	0	0	0	2.35258e-05	0	0	0	0	0	0	Bacteria; Proteobacteria; Epsilonproteobacteria; Campylobacterales; Helicobacteraceae; Sulfurimonas; uncultured bacterium
New,CleanUp,ReferenceOTU552600	0	0	0	0	0	0	0	2.35258e-05	0	0	0	0	0	0	Unassigned
New,CleanUp,ReferenceOTU195887	0	0	0	0	0	0	0	2.35258e-05	0	0	0	0	0	0	Unassigned
New,CleanUp,ReferenceOTU62891	0	0	0	0	0	0	0	2.35258e-05	0	0	0	0	0	0	Unassigned
New,CleanUp,ReferenceOTU563808	0	0	0	0	0	0	0	2.35258e-05	0	0	0	0	0	0	Unassigned
New,CleanUp,ReferenceOTU871318	0	0	0	0	0	0	0	2.35258e-05	0	0	0	0	0	0	Bacteria; Proteobacteria; Epsilonproteobacteria; Campylobacterales; Helicobacteraceae; Sulfurimonas
New,CleanUp,ReferenceOTU722428	0	0	0	0	0	0	0	2.35258e-05	0	0	0	0	0	0	Bacteria; Proteobacteria; Deltaproteobacteria; Desulfobacterales; Desulfobulbaceae; Desulfobulbus; uncultured bacterium
New,CleanUp,ReferenceOTU384337	0	0	0	0	0	0	0	2.35258e-05	0	0	0	0	0	0	Unassigned
New,CleanUp,ReferenceOTU217985	0	0	0	0	0	0	0	2.35258e-05	0	0	0	0	0	0	Bacteria; Proteobacteria; Epsilonproteobacteria; Campylobacterales; Helicobacteraceae; Sulfurimonas; uncultured bacterium
New,CleanUp,ReferenceOTU342315	0	0	0	0	0	2.04026e-06	2.63985e-06	1.88207e-05	0	0	0	0	0	0	Bacteria; Proteobacteria; Epsilonproteobacteria; Campylobacterales; Helicobacteraceae; Sulfurovum; uncultured epsilon proteobacterium
New,CleanUp,ReferenceOTU52897	0	0	0	0	0	2.04026e-06	1.97989e-05	1.56839e-06	0	0	0	0	0	0	Bacteria; Proteobacteria; Epsilonproteobacteria; Campylobacterales; Helicobacteraceae; Sulfurovum; uncultured epsilon proteobacterium
New,CleanUp,ReferenceOTU359234	0	0	0	0	0	3.06038e-06	0	0	0	2.02772e-05	0	0	0	0	Unassigned
New,CleanUp,ReferenceOTU285854	0	0	0	0	0	0	0	0	2.32986e-05	0	0	0	0	0	Bacteria; Proteobacteria; Epsilonproteobacteria; Campylobacterales; Helicobacteraceae; Sulfurimonas; uncultured bacterium
DQ836759,1,1457	0	0	0	0	0	0	0	0	2.32986e-05	0	0	0	0	0	Bacteria; Proteobacteria; Epsilonproteobacteria; Campylobacterales; Helicobacteraceae; Sulfurimonas; uncultured bacterium
New,CleanUp,ReferenceOTU542831	0	0	0	0	0	9.18115e-06	0	1.41155e-05	0	0	0	0	0	0	Bacteria; Proteobacteria; Epsilonproteobacteria; Campylobacterales; Helicobacteraceae; Sulfurimonas
New,CleanUp,ReferenceOTU129751	0	0	0	0	0	2.04026e-06	0	6.27356e-06	1.49777e-05	0	0	0	0	0	Bacteria; Proteobacteria; Epsilonproteobacteria; Campylobacterales; Helicobacteraceae; Sulfurovum; uncultured bacterium
FJ628244,1,1466	0	0	0	0	0	3.06038e-06	1.8479e-05	0	1.66418e-06	0	0	0	0	0	Bacteria; Proteobacteria; Epsilonproteobacteria; Campylobacterales; Helicobacteraceae; Sulfurimonas; uncultured bacterium
JQ032350,1,1314	0	0	0	0	0	1.32617e-05	6.59963e-06	0	3.32837e-06	0	0	0	0	0	Bacteria; Proteobacteria; Gammaproteobacteria; Alteromonadales; Alteromonadaceae; Marinobacter; uncultured bacterium
New,CleanUp,ReferenceOTU84623	0	0	0	0	0	0	0	3.13678e-06	1.99702e-05	0	0	0	0	0	Bacteria; Proteobacteria; Epsilonproteobacteria; Campylobacterales; Campylobacteraceae; Sulfurospirillum; uncultured bacterium
New,CleanUp,ReferenceOTU521674	0	0	0	0	0	1.83623e-05	0	4.70517e-06	0	0	0	0	0	0	Bacteria; Proteobacteria; Epsilonproteobacteria; Nautiliales; Nautiliaceae; Thioreductor
New,CleanUp,ReferenceOTU538275	0	0	0	0	0	0	0	4.70517e-06	1.8306e-05	0	0	0	0	0	Bacteria; Proteobacteria; Epsilonproteobacteria; Campylobacterales; Campylobacteraceae; Sulfurospirillum; uncultured bacterium
New,CleanUp,ReferenceOTU530174	0	0	0	0	0	2.14227e-05	0	1.56839e-06	0	0	0	0	0	0	Bacteria; Proteobacteria; Epsilonproteobacteria; Campylobacterales; Helicobacteraceae; Sulfurovum; uncultured bacterium
New,CleanUp,ReferenceOTU869858	0	0	0	0	0	0	1.31993e-06	0	2.16344e-05	0	0	0	0	0	Unassigned
New,CleanUp,ReferenceOTU1114642	0	0	0	0	0	1.02013e-05	7.91956e-06	4.70517e-06	0	0	0	0	0	0	Bacteria; Proteobacteria; Epsilonproteobacteria; Campylobacterales; Helicobacteraceae; Sulfurovum; uncultured epsilon proteobacterium
New,CleanUp,ReferenceOTU1030252	0	0	0	0	0	2.04026e-06	0	1.41155e-05	6.65674e-06	0	0	0	0	0	Bacteria; Proteobacteria; Epsilonproteobacteria; Campylobacterales; Helicobacteraceae; Sulfurovum; uncultured bacterium
New,CleanUp,ReferenceOTU116148	0	0	1.11378e-06	0	0	5.10064e-06	1.18793e-05	4.70517e-06	0	0	0	0	0	0	Bacteria; BD1-5; uncultured bacterium; uncultured bacterium; uncultured bacterium; uncultured bacterium; uncultured bacterium
New,CleanUp,ReferenceOTU1114838	0	0	0	0	0	4.08051e-06	1.31993e-06	1.56839e-05	1.66418e-06	0	0	0	0	0	Bacteria; Proteobacteria; Epsilonproteobacteria; Campylobacterales; Helicobacteraceae; Sulfurimonas; uncultured bacterium
New,CleanUp,ReferenceOTU373276	0	0	0	0	0	2.04026e-06	0	1.88207e-05	0	1.84339e-06	0	0	0	0	Bacteria; Proteobacteria; Epsilonproteobacteria; Nautiliales; Nautiliaceae; Nitratifractor
New,CleanUp,ReferenceOTU883098	0	0	0	0	0	7.1409e-06	1.05594e-05	0	4.99255e-06	0	0	0	0	0	Bacteria; Proteobacteria; Epsilonproteobacteria; Campylobacterales; Helicobacteraceae; Sulfurimonas; uncultured bacterium
New,CleanUp,ReferenceOTU614850	0	0	0	0	0	1.63221e-05	0	4.70517e-06	1.66418e-06	0	0	0	0	0	Bacteria; Proteobacteria; Deltaproteobacteria; Desulfurellales; Desulfurellaceae; uncultured; uncultured bacterium
New,CleanUp,ReferenceOTU340747	0	0	0	0	0	1.32617e-05	0	9.41033e-06	0	0	0	0	0	0	Bacteria; Proteobacteria; Epsilonproteobacteria; Campylobacterales; Helicobacteraceae; Sulfurovum; uncultured epsilon proteobacterium
New,CleanUp,ReferenceOTU497175	0	0	0	0	0	9.18115e-06	1.18793e-05	1.56839e-06	0	0	0	0	0	0	Bacteria; Proteobacteria; Epsilonproteobacteria; Campylobacterales; Helicobacteraceae; Sulfurimonas; uncultured bacterium
New,CleanUp,ReferenceOTU321667	0	0	0	0	0	5.10064e-06	1.58391e-05	0	1.66418e-06	0	0	0	0	0	Unassigned
New,CleanUp,ReferenceOTU498110	0	0	0	0	0	0	1.31993e-06	7.84194e-06	1.33135e-05	0	0	0	0	0	Bacteria; Proteobacteria; Epsilonproteobacteria; Campylobacterales; Helicobacteraceae; Sulfurimonas
New,CleanUp,ReferenceOTU316299	0	0	0	0	0	2.04026e-06	0	2.03891e-05	0	0	0	0	0	0	Bacteria; Proteobacteria; Epsilonproteobacteria; Nautiliales; Nautiliaceae; Nitratifractor; uncultured bacterium
New,CleanUp,ReferenceOTU1046223	0	0	0	0	0	2.04026e-06	0	2.03891e-05	0	0	0	0	0	0	Bacteria; Proteobacteria; Epsilonproteobacteria; Nautiliales; Nautiliaceae; Thioreductor
New,CleanUp,ReferenceOTU1066297	0	0	0	0	0	1.12214e-05	0	9.41033e-06	1.66418e-06	0	0	0	0	0	Unassigned
New,CleanUp,ReferenceOTU994912	0	0	0	0	0	3.06038e-06	9.23948e-06	0	9.98511e-06	0	0	0	0	0	Bacteria; Proteobacteria; Epsilonproteobacteria; Campylobacterales; Campylobacteraceae; Sulfurospirillum; uncultured bacterium
AF355050,1,1465	0	0	0	0	0	1.02013e-06	0	6.27356e-06	1.49777e-05	0	0	0	0	0	Bacteria; Proteobacteria; Epsilonproteobacteria; Campylobacterales; Helicobacteraceae; Sulfurimonas; uncultured epsilon proteobacterium
New,CleanUp,ReferenceOTU159376	0	0	0	0	0	3.06038e-06	2.63985e-06	7.84194e-06	4.99255e-06	3.68677e-06	0	0	0	0	Bacteria; BHI80-139
New,CleanUp,ReferenceOTU940781	0	0	3.34133e-06	0	0	0	0	1.88207e-05	0	0	0	0	0	0	Unassigned
New,CleanUp,ReferenceOTU1090419	0	0	0	0	0	0	1.7159e-05	0	4.99255e-06	0	0	0	0	0	Bacteria; Proteobacteria; Epsilonproteobacteria; Campylobacterales; Helicobacteraceae; Sulfurovum; uncultured bacterium
New,CleanUp,ReferenceOTU418609	0	0	0	0	0	0	0	0	0	2.21206e-05	0	0	0	0	Unassigned
New,CleanUp,ReferenceOTU242572	0	0	0	0	0	0	0	0	0	2.21206e-05	0	0	0	0	Bacteria; Aquificae; Aquificae; Aquificales; Desulfurobacteriaceae; Desulfurobacterium
New,CleanUp,ReferenceOTU140796	0	0	0	0	0	0	0	0	0	2.21206e-05	0	0	0	0	Bacteria; Proteobacteria; Epsilonproteobacteria; Nautiliales; Nautiliaceae; Nitratifractor; uncultured bacterium
New,CleanUp,ReferenceOTU732927	0	0	0	0	0	0	0	0	0	2.21206e-05	0	0	0	0	Bacteria; Proteobacteria; Epsilonproteobacteria; Nautiliales; Nautiliaceae; Nitratifractor; uncultured bacterium
New,CleanUp,ReferenceOTU177561	0	0	0	0	0	0	0	0	0	2.21206e-05	0	0	0	0	Unassigned
New,CleanUp,ReferenceOTU466200	0	0	0	0	0	0	0	0	0	2.21206e-05	0	0	0	0	Bacteria; Aquificae; Aquificae; Aquificales; Desulfurobacteriaceae; Desulfurobacterium
New,CleanUp,ReferenceOTU12453	0	0	0	0	0	0	0	0	0	2.21206e-05	0	0	0	0	Bacteria; Proteobacteria; Epsilonproteobacteria; Nautiliales; Nautiliaceae; Nitratifractor; uncultured bacterium
AB016298,1,1416	0	0	0	0	0	0	0	0	0	2.21206e-05	0	0	0	0	Archaea; Euryarchaeota; Thermococci; Thermococcales; Thermococcaceae; Thermococcus
New,CleanUp,ReferenceOTU130881	0	0	0	0	0	0	0	0	0	2.21206e-05	0	0	0	0	Unassigned
New,CleanUp,ReferenceOTU495889	0	0	0	0	0	0	0	0	0	2.21206e-05	0	0	0	0	Bacteria; Proteobacteria; Epsilonproteobacteria; Nautiliales; Nautiliaceae; Nitratifractor; uncultured bacterium
New,CleanUp,ReferenceOTU530233	0	0	0	0	0	0	0	0	0	2.21206e-05	0	0	0	0	Bacteria; Aquificae; Aquificae; Aquificales; Desulfurobacteriaceae; Desulfurobacterium
New,CleanUp,ReferenceOTU550636	0	0	0	0	0	0	0	0	0	2.21206e-05	0	0	0	0	Bacteria; Thermodesulfobacteria; Thermodesulfobacteria; Thermodesulfobacteriales; Thermodesulfobacteriaceae; Thermodesulfatator
New,CleanUp,ReferenceOTU502286	0	0	0	0	0	0	0	0	0	2.21206e-05	0	0	0	0	Archaea; Crenarchaeota; Thermoprotei; Thermoproteales; Thermoproteaceae; uncultured; uncultured archaeon
New,CleanUp,ReferenceOTU621990	0	0	0	0	0	0	0	0	0	2.21206e-05	0	0	0	0	Bacteria; Aquificae; Aquificae; Aquificales; Desulfurobacteriaceae; Desulfurobacterium
New,CleanUp,ReferenceOTU1147187	0	0	0	0	0	0	0	0	0	2.21206e-05	0	0	0	0	Bacteria; Thermodesulfobacteria; Thermodesulfobacteria; Thermodesulfobacteriales; Thermodesulfobacteriaceae; Thermodesulfatator
New,CleanUp,ReferenceOTU431096	0	0	0	0	0	0	0	0	0	2.21206e-05	0	0	0	0	Bacteria; Thermodesulfobacteria; Thermodesulfobacteria; Thermodesulfobacteriales; Thermodesulfobacteriaceae; Caldimicrobium; uncultured Thermodesulfobacterium sp,
New,CleanUp,ReferenceOTU198493	0	0	0	0	0	0	0	0	0	2.21206e-05	0	0	0	0	Bacteria; Aquificae; Aquificae; Aquificales; Desulfurobacteriaceae; Desulfurobacterium
New,CleanUp,ReferenceOTU370424	0	0	0	0	0	7.1409e-06	5.27971e-06	4.70517e-06	4.99255e-06	0	0	0	0	0	Bacteria; Proteobacteria; Epsilonproteobacteria; Campylobacterales; Helicobacteraceae; Sulfurimonas; uncultured bacterium
New,CleanUp,ReferenceOTU1068353	0	0	0	0	0	2.04026e-06	1.8479e-05	1.56839e-06	0	0	0	0	0	0	Bacteria; Proteobacteria; Gammaproteobacteria; Alteromonadales; Colwelliaceae; Colwellia; uncultured bacterium
New,CleanUp,ReferenceOTU883307	0	0	0	0	0	1.02013e-06	0	9.41033e-06	1.16493e-05	0	0	0	0	0	Bacteria; Proteobacteria; Epsilonproteobacteria; Campylobacterales; Helicobacteraceae; Sulfurimonas; uncultured bacterium
New,CleanUp,ReferenceOTU418792	0	0	0	0	0	3.06038e-06	0	1.56839e-05	3.32837e-06	0	0	0	0	0	Bacteria; Proteobacteria; Epsilonproteobacteria; Nautiliales; Nautiliaceae; Thioreductor
New,CleanUp,ReferenceOTU101267	0	0	0	0	0	0	0	2.03891e-05	1.66418e-06	0	0	0	0	0	Unassigned
New,CleanUp,ReferenceOTU448625	0	0	0	0	0	0	0	2.03891e-05	1.66418e-06	0	0	0	0	0	Bacteria; Proteobacteria; Epsilonproteobacteria; Campylobacterales; Helicobacteraceae; Sulfurovum; uncultured epsilon proteobacterium
New,CleanUp,ReferenceOTU18009	0	0	0	0	0	3.06038e-06	1.58391e-05	3.13678e-06	0	0	0	0	0	0	Bacteria; BD1-5; uncultured bacterium; uncultured bacterium; uncultured bacterium; uncultured bacterium; uncultured bacterium
New,CleanUp,ReferenceOTU1122777	0	0	0	0	0	2.04026e-06	1.05594e-05	9.41033e-06	0	0	0	0	0	0	Unassigned
New,CleanUp,ReferenceOTU1022846	0	0	0	0	0	1.02013e-06	0	1.09787e-05	9.98511e-06	0	0	0	0	0	Bacteria; Candidate division SR1; uncultured bacterium; uncultured bacterium; uncultured bacterium; uncultured bacterium; uncultured bacterium
New,CleanUp,ReferenceOTU927163	0	0	0	0	0	2.04026e-05	0	1.56839e-06	0	0	0	0	0	0	Bacteria; Proteobacteria; Epsilonproteobacteria; Campylobacterales; Helicobacteraceae; Sulfurovum; uncultured bacterium
New,CleanUp,ReferenceOTU617166	0	0	0	0	0	0	0	2.19574e-05	0	0	0	0	0	0	Bacteria; Proteobacteria; Epsilonproteobacteria; Campylobacterales; Helicobacteraceae; Sulfurimonas
New,CleanUp,ReferenceOTU503636	0	0	0	0	0	0	0	2.19574e-05	0	0	0	0	0	0	Bacteria; Proteobacteria; Gammaproteobacteria; Thiotrichales; Piscirickettsiaceae; Thiomicrospira; uncultured gamma proteobacterium
New,CleanUp,ReferenceOTU972482	0	0	0	0	0	0	0	2.19574e-05	0	0	0	0	0	0	Bacteria; Proteobacteria; Deltaproteobacteria; Desulfurellales; Desulfurellaceae; Hippea; uncultured delta proteobacterium
New,CleanUp,ReferenceOTU187313	0	0	0	0	0	0	0	2.19574e-05	0	0	0	0	0	0	Unassigned
New,CleanUp,ReferenceOTU209868	0	0	0	0	0	0	0	2.19574e-05	0	0	0	0	0	0	Bacteria; Proteobacteria; Epsilonproteobacteria; Nautiliales; Nautiliaceae; Lebetimonas
New,CleanUp,ReferenceOTU522242	0	0	0	0	0	0	0	2.19574e-05	0	0	0	0	0	0	Bacteria; Proteobacteria; Epsilonproteobacteria; Nautiliales; Nautiliaceae; Thioreductor
New,CleanUp,ReferenceOTU93690	0	0	0	0	0	0	0	2.19574e-05	0	0	0	0	0	0	Unassigned
New,CleanUp,ReferenceOTU581524	0	0	0	0	0	0	0	2.19574e-05	0	0	0	0	0	0	Bacteria; Acidobacteria; Holophagae; Acanthopleuribacterales; Acanthopleuribacteraceae; Thermotomaculum; uncultured bacterium
New,CleanUp,ReferenceOTU541229	0	0	0	0	0	0	0	2.19574e-05	0	0	0	0	0	0	Bacteria; Proteobacteria; Epsilonproteobacteria; Nautiliales; Nautiliaceae; Thioreductor
New,CleanUp,ReferenceOTU224598	0	0	0	0	0	0	0	2.19574e-05	0	0	0	0	0	0	Bacteria; Proteobacteria; Epsilonproteobacteria; Campylobacterales; Helicobacteraceae; Sulfurimonas; uncultured bacterium
New,CleanUp,ReferenceOTU680733	0	0	0	0	0	0	0	2.19574e-05	0	0	0	0	0	0	Bacteria; Proteobacteria; Epsilonproteobacteria; Campylobacterales; Helicobacteraceae
New,CleanUp,ReferenceOTU852587	0	0	0	0	0	0	0	2.19574e-05	0	0	0	0	0	0	Unassigned
New,CleanUp,ReferenceOTU768909	0	0	0	0	0	0	0	2.19574e-05	0	0	0	0	0	0	Bacteria; Proteobacteria; Epsilonproteobacteria; Campylobacterales; Helicobacteraceae; Sulfurimonas
EF644842,1,1332	0	0	0	0	0	3.06038e-06	0	1.88207e-05	0	0	0	0	0	0	Bacteria; Proteobacteria; Epsilonproteobacteria; Campylobacterales; Campylobacteraceae; Thiofractor; uncultured bacterium
New,CleanUp,ReferenceOTU540109	0	0	0	0	0	3.06038e-06	2.63985e-06	7.84194e-06	8.32092e-06	0	0	0	0	0	Bacteria; Proteobacteria; Epsilonproteobacteria; Nautiliales; Nautiliaceae; uncultured; uncultured proteobacterium
New,CleanUp,ReferenceOTU443545	0	0	0	0	0	1.22415e-05	7.91956e-06	0	1.66418e-06	0	0	0	0	0	Bacteria; BD1-5; uncultured bacterium; uncultured bacterium; uncultured bacterium; uncultured bacterium; uncultured bacterium
New,CleanUp,ReferenceOTU24371	0	0	0	0	0	6.12077e-06	0	1.56839e-05	0	0	0	0	0	0	Bacteria; Bacteroidetes; VC2,1 Bac22; uncultured bacterium; uncultured bacterium; uncultured bacterium; uncultured bacterium
New,CleanUp,ReferenceOTU506176	0	0	0	0	0	0	3.95978e-06	7.84194e-06	9.98511e-06	0	0	0	0	0	Bacteria; Proteobacteria; Epsilonproteobacteria; Campylobacterales; Campylobacteraceae; Sulfurospirillum; uncultured bacterium
New,CleanUp,ReferenceOTU1073708	0	0	0	0	0	2.04026e-06	0	3.13678e-06	0	1.65905e-05	0	0	0	0	Bacteria; BD1-5; uncultured bacterium; uncultured bacterium; uncultured bacterium; uncultured bacterium; uncultured bacterium
New,CleanUp,ReferenceOTU853227	0	0	0	0	0	9.18115e-06	0	1.25471e-05	0	0	0	0	0	0	Bacteria; Proteobacteria; Epsilonproteobacteria; Campylobacterales; Helicobacteraceae; Sulfurimonas; uncultured bacterium
New,CleanUp,ReferenceOTU569400	0	0	0	0	0	0	1.31993e-06	2.03891e-05	0	0	0	0	0	0	Unassigned
FN562853,1,1331	0	0	2.22755e-06	0	0	4.08051e-06	1.31993e-06	3.13678e-06	1.66418e-06	9.21693e-06	0	0	0	0	Bacteria; Proteobacteria; Epsilonproteobacteria; Campylobacterales; Helicobacteraceae; Sulfurovum; uncultured epsilon proteobacterium
New,CleanUp,ReferenceOTU872694	0	0	0	0	0	0	0	0	2.16344e-05	0	0	0	0	0	Bacteria; Proteobacteria; Epsilonproteobacteria; Campylobacterales; Helicobacteraceae; Sulfurimonas; uncultured bacterium
New,CleanUp,ReferenceOTU867998	0	0	0	0	0	0	0	0	2.16344e-05	0	0	0	0	0	Bacteria; Aquificae; Aquificae; Aquificales; Desulfurobacteriaceae; Desulfurobacterium
New,CleanUp,ReferenceOTU717382	0	0	0	0	0	0	0	0	2.16344e-05	0	0	0	0	0	Bacteria; Proteobacteria; Epsilonproteobacteria; Campylobacterales; Campylobacteraceae; Sulfurospirillum; uncultured bacterium
New,CleanUp,ReferenceOTU433334	0	0	0	0	0	0	1.05594e-05	0	0	1.10603e-05	0	0	0	0	Unassigned
New,CleanUp,ReferenceOTU564467	0	0	0	0	0	0	1.31993e-06	0	0	2.02772e-05	0	0	0	0	Bacteria; Proteobacteria; Epsilonproteobacteria; Campylobacterales; Helicobacteraceae; Sulfurovum; uncultured epsilon proteobacterium
New,CleanUp,ReferenceOTU551924	0	0	0	0	0	1.53019e-05	0	6.27356e-06	0	0	0	0	0	0	Bacteria; Proteobacteria; Epsilonproteobacteria; Nautiliales; Nautiliaceae; Nitratifractor; uncultured bacterium
New,CleanUp,ReferenceOTU494269	0	0	0	0	0	1.83623e-05	0	3.13678e-06	0	0	0	0	0	0	Bacteria; Proteobacteria; Epsilonproteobacteria
New,CleanUp,ReferenceOTU1029018	0	0	0	0	0	1.02013e-06	0	9.41033e-06	0	1.10603e-05	0	0	0	0	Bacteria; BD1-5; uncultured bacterium; uncultured bacterium; uncultured bacterium; uncultured bacterium; uncultured bacterium
DQ831555,1,1517	0	0	0	0	0	1.02013e-06	0	2.03891e-05	0	0	0	0	0	0	Bacteria; Proteobacteria; Deltaproteobacteria; Desulfobacterales; Desulfobulbaceae; Desulfobulbus; uncultured bacterium
New,CleanUp,ReferenceOTU308626	0	0	0	0	0	1.02013e-06	0	2.03891e-05	0	0	0	0	0	0	Bacteria; Proteobacteria; Epsilonproteobacteria
New,CleanUp,ReferenceOTU409000	0	0	0	0	0	1.02013e-06	0	2.03891e-05	0	0	0	0	0	0	Unassigned
New,CleanUp,ReferenceOTU63800	0	0	0	0	0	1.02013e-06	0	2.03891e-05	0	0	0	0	0	0	Bacteria; Proteobacteria; Epsilonproteobacteria; Campylobacterales; Helicobacteraceae; Sulfurovum; uncultured bacterium
New,CleanUp,ReferenceOTU502326	0	0	0	0	0	4.08051e-06	0	1.72523e-05	0	0	0	0	0	0	Bacteria; Proteobacteria; Epsilonproteobacteria; Campylobacterales; Helicobacteraceae; Sulfurovum
New,CleanUp,ReferenceOTU695185	0	0	0	0	0	1.02013e-06	0	0	0	2.02772e-05	0	0	0	0	Bacteria; Proteobacteria; Epsilonproteobacteria; Campylobacterales; Helicobacteraceae; Sulfurovum
New,CleanUp,ReferenceOTU134458	0	0	0	0	0	0	1.31993e-06	0	1.99702e-05	0	0	0	0	0	Bacteria; Proteobacteria; Epsilonproteobacteria; Campylobacterales; Helicobacteraceae; Sulfurimonas; uncultured epsilon proteobacterium
EU107477,1,1511	0	0	3.34133e-06	0	0	3.06038e-06	1.31993e-05	0	1.66418e-06	0	0	0	0	0	Bacteria; Proteobacteria; Epsilonproteobacteria; Campylobacterales; Helicobacteraceae; Sulfurovum; uncultured epsilon proteobacterium
FJ628249,1,1474	0	0	0	0	0	1.83623e-05	1.31993e-06	1.56839e-06	0	0	0	0	0	0	Bacteria; Proteobacteria; Epsilonproteobacteria; Campylobacterales; Helicobacteraceae; Sulfurimonas; uncultured bacterium
New,CleanUp,ReferenceOTU49896	0	0	0	0	0	1.02013e-05	0	1.09787e-05	0	0	0	0	0	0	Bacteria; Proteobacteria; Epsilonproteobacteria; Campylobacterales; Helicobacteraceae; Sulfurimonas; uncultured bacterium
New,CleanUp,ReferenceOTU771616	0	0	0	0	0	3.06038e-06	0	3.13678e-06	1.49777e-05	0	0	0	0	0	Archaea; Euryarchaeota; Thermococci; Thermococcales; Thermococcaceae
New,CleanUp,ReferenceOTU572600	0	0	0	0	0	4.08051e-06	9.23948e-06	7.84194e-06	0	0	0	0	0	0	Unassigned
New,CleanUp,ReferenceOTU800699	0	0	1.11378e-06	0	0	0	1.8479e-05	1.56839e-06	0	0	0	0	0	0	Bacteria; Proteobacteria; Epsilonproteobacteria; Campylobacterales; Helicobacteraceae; Sulfurimonas
New,CleanUp,ReferenceOTU1026358	0	0	0	0	0	1.02013e-06	1.31993e-06	1.88207e-05	0	0	0	0	0	0	Bacteria; Proteobacteria; Gammaproteobacteria; Alteromonadales; Colwelliaceae; Colwellia; uncultured bacterium
New,CleanUp,ReferenceOTU708466	0	0	0	0	0	0	0	7.84194e-06	1.33135e-05	0	0	0	0	0	Archaea; Euryarchaeota; Archaeoglobi; Archaeoglobales; Archaeoglobaceae; uncultured; uncultured archaeon
New,CleanUp,ReferenceOTU797221	0	0	0	0	0	1.32617e-05	0	7.84194e-06	0	0	0	0	0	0	Bacteria; Proteobacteria; Epsilonproteobacteria; Campylobacterales; Helicobacteraceae; Sulfurovum; uncultured epsilon proteobacterium
New,CleanUp,ReferenceOTU379670	0	0	0	0	0	1.02013e-06	1.8479e-05	1.56839e-06	0	0	0	0	0	0	Bacteria; Proteobacteria; Gammaproteobacteria; Alteromonadales; Colwelliaceae; Colwellia; uncultured bacterium
New,CleanUp,ReferenceOTU1071756	0	0	0	0	0	0	0	9.41033e-06	1.16493e-05	0	0	0	0	0	Bacteria; Proteobacteria; Deltaproteobacteria; Desulfurellales; Desulfurellaceae; Hippea
New,CleanUp,ReferenceOTU775305	0	0	0	0	0	5.10064e-06	0	1.41155e-05	0	1.84339e-06	0	0	0	0	Bacteria; Proteobacteria; Epsilonproteobacteria; Campylobacterales; Helicobacteraceae; Sulfurovum; uncultured epsilon proteobacterium
New,CleanUp,ReferenceOTU478495	0	0	0	0	0	7.1409e-06	1.31993e-06	1.25471e-05	0	0	0	0	0	0	Bacteria; Proteobacteria; Epsilonproteobacteria; Campylobacterales; Helicobacteraceae; Sulfurovum
New,CleanUp,ReferenceOTU75322	0	0	0	0	0	3.06038e-06	1.31993e-05	4.70517e-06	0	0	0	0	0	0	Bacteria; Bacteroidetes; Flavobacteriia; Flavobacteriales; Flavobacteriaceae; uncultured Bacteroidetes bacterium; uncultured Bacteroidetes bacterium
New,CleanUp,ReferenceOTU363386	0	0	0	0	0	3.06038e-06	1.31993e-05	4.70517e-06	0	0	0	0	0	0	Unassigned
New,ReferenceOTU1351	0	0	0	0	0	0	0	1.09787e-05	9.98511e-06	0	0	0	0	0	Bacteria; Proteobacteria; Epsilonproteobacteria; Campylobacterales; Helicobacteraceae; Sulfurovum; uncultured epsilon proteobacterium
New,CleanUp,ReferenceOTU1045625	0	0	0	0	0	0	0	1.41155e-05	4.99255e-06	1.84339e-06	0	0	0	0	Bacteria; Proteobacteria; Epsilonproteobacteria; Campylobacterales; Helicobacteraceae; Sulfurimonas; uncultured bacterium
New,CleanUp,ReferenceOTU682945	0	0	0	0	0	8.16103e-06	0	9.41033e-06	3.32837e-06	0	0	0	0	0	Bacteria; Candidate division SR1; uncultured bacterium; uncultured bacterium; uncultured bacterium; uncultured bacterium; uncultured bacterium
New,CleanUp,ReferenceOTU440627	0	0	0	0	0	0	0	1.25471e-05	8.32092e-06	0	0	0	0	0	Bacteria; Proteobacteria; Gammaproteobacteria; Thiotrichales; Piscirickettsiaceae; Thiomicrospira; uncultured gamma proteobacterium
New,CleanUp,ReferenceOTU475466	0	0	0	0	0	0	0	1.25471e-05	8.32092e-06	0	0	0	0	0	Bacteria; Proteobacteria; Epsilonproteobacteria; Campylobacterales; Helicobacteraceae; Sulfurimonas; uncultured bacterium
New,CleanUp,ReferenceOTU372373	0	0	0	0	0	5.10064e-06	7.91956e-06	7.84194e-06	0	0	0	0	0	0	Bacteria; Proteobacteria; Deltaproteobacteria; Desulfobacterales; Desulfobulbaceae; Desulfobulbus; uncultured bacterium
New,CleanUp,ReferenceOTU502403	0	0	0	0	0	2.04026e-06	0	1.88207e-05	0	0	0	0	0	0	Bacteria; Proteobacteria; Epsilonproteobacteria; Campylobacterales; Helicobacteraceae; Sulfurovum; uncultured epsilon proteobacterium
New,CleanUp,ReferenceOTU232776	0	0	0	0	0	2.04026e-06	0	1.88207e-05	0	0	0	0	0	0	Unassigned
New,CleanUp,ReferenceOTU246636	0	0	0	0	0	8.16103e-06	7.91956e-06	4.70517e-06	0	0	0	0	0	0	Bacteria; Proteobacteria; Epsilonproteobacteria; Campylobacterales; Helicobacteraceae; Sulfurovum; uncultured epsilon proteobacterium
New,CleanUp,ReferenceOTU997570	0	0	1.11378e-06	0	0	1.53019e-05	2.63985e-06	0	1.66418e-06	0	0	0	0	0	Bacteria; Proteobacteria; Epsilonproteobacteria; Campylobacterales; Helicobacteraceae; Sulfurimonas; uncultured bacterium
New,CleanUp,ReferenceOTU1057093	0	0	0	0	0	8.16103e-06	0	1.25471e-05	0	0	0	0	0	0	Bacteria; Proteobacteria; Epsilonproteobacteria; Campylobacterales; Helicobacteraceae; Sulfurovum
New,CleanUp,ReferenceOTU728639	0	0	0	0	0	0	0	1.56839e-05	4.99255e-06	0	0	0	0	0	Bacteria; Proteobacteria; Epsilonproteobacteria; Nautiliales; Nautiliaceae
New,CleanUp,ReferenceOTU108925	0	0	0	0	0	1.73422e-05	0	0	3.32837e-06	0	0	0	0	0	Bacteria; Proteobacteria; Epsilonproteobacteria; Campylobacterales; Helicobacteraceae; Sulfurimonas
New,CleanUp,ReferenceOTU355353	0	0	2.22755e-06	0	0	1.53019e-05	0	3.13678e-06	0	0	0	0	0	0	Bacteria; Proteobacteria; Epsilonproteobacteria; Nautiliales; Nautiliaceae; Thioreductor
New,CleanUp,ReferenceOTU892105	0	0	0	0	0	3.06038e-06	6.59963e-06	1.09787e-05	0	0	0	0	0	0	Unassigned
New,CleanUp,ReferenceOTU770714	0	0	0	0	0	1.12214e-05	0	9.41033e-06	0	0	0	0	0	0	Bacteria; Proteobacteria; Epsilonproteobacteria; Nautiliales; Nautiliaceae; Thioreductor
New,CleanUp,ReferenceOTU402697	0	0	0	0	0	7.1409e-06	1.18793e-05	1.56839e-06	0	0	0	0	0	0	Bacteria; Proteobacteria; Epsilonproteobacteria; Campylobacterales; Helicobacteraceae; Sulfurovum; uncultured bacterium
New,CleanUp,ReferenceOTU950070	0	0	0	0	0	1.22415e-05	0	0	8.32092e-06	0	0	0	0	0	Bacteria; Proteobacteria; Epsilonproteobacteria; Nautiliales; Nautiliaceae; Nitratiruptor
New,CleanUp,ReferenceOTU380966	0	0	0	0	0	3.06038e-06	0	1.41155e-05	3.32837e-06	0	0	0	0	0	Bacteria; Firmicutes; Clostridia; Thermoanaerobacterales; Thermodesulfobiaceae; Coprothermobacter
New,CleanUp,ReferenceOTU693484	0	0	0	0	0	9.18115e-06	7.91956e-06	0	3.32837e-06	0	0	0	0	0	Bacteria; BD1-5; uncultured bacterium; uncultured bacterium; uncultured bacterium; uncultured bacterium; uncultured bacterium
New,CleanUp,ReferenceOTU1134753	0	0	0	0	0	6.12077e-06	0	1.09787e-05	3.32837e-06	0	0	0	0	0	Bacteria; Proteobacteria; Epsilonproteobacteria; Nautiliales; Nautiliaceae; Nitratifractor
AJ441227,1,1419	0	0	0	0	0	4.08051e-06	5.27971e-06	0	0	1.10603e-05	0	0	0	0	Bacteria; Chloroflexi; Anaerolineae; Anaerolineales; Anaerolineaceae; uncultured; uncultured Chloroflexi bacterium
New,ReferenceOTU417	0	0	0	0	0	0	0	2.03891e-05	0	0	0	0	0	0	Unassigned
New,CleanUp,ReferenceOTU450573	0	0	0	0	0	0	0	2.03891e-05	0	0	0	0	0	0	Unassigned
New,CleanUp,ReferenceOTU1020233	0	0	0	0	0	0	0	2.03891e-05	0	0	0	0	0	0	Unassigned
New,CleanUp,ReferenceOTU109183	0	0	0	0	0	0	0	2.03891e-05	0	0	0	0	0	0	Bacteria; Proteobacteria; Epsilonproteobacteria; Campylobacterales; Helicobacteraceae; Sulfurovum; uncultured bacterium
New,CleanUp,ReferenceOTU984430	0	0	0	0	0	0	0	2.03891e-05	0	0	0	0	0	0	Unassigned
New,CleanUp,ReferenceOTU432047	0	0	0	0	0	0	0	2.03891e-05	0	0	0	0	0	0	Bacteria; Bacteroidetes; Flavobacteriia; Flavobacteriales; R103-B20; uncultured bacterium; uncultured bacterium
New,CleanUp,ReferenceOTU16738	0	0	0	0	0	0	0	2.03891e-05	0	0	0	0	0	0	Unassigned
New,CleanUp,ReferenceOTU741483	0	0	0	0	0	0	0	2.03891e-05	0	0	0	0	0	0	Bacteria; Proteobacteria; Deltaproteobacteria; Desulfurellales; Desulfurellaceae; Hippea; uncultured delta proteobacterium
New,CleanUp,ReferenceOTU76221	0	0	0	0	0	0	0	2.03891e-05	0	0	0	0	0	0	Bacteria; Proteobacteria
New,CleanUp,ReferenceOTU540284	0	0	0	0	0	0	0	2.03891e-05	0	0	0	0	0	0	Unassigned
New,CleanUp,ReferenceOTU750123	0	0	0	0	0	0	0	2.03891e-05	0	0	0	0	0	0	Bacteria; Proteobacteria; Epsilonproteobacteria; Campylobacterales; Campylobacteraceae; Thiofractor; uncultured bacterium
New,CleanUp,ReferenceOTU41686	0	0	0	0	0	0	0	2.03891e-05	0	0	0	0	0	0	Unassigned
New,CleanUp,ReferenceOTU585556	0	0	0	0	0	0	0	2.03891e-05	0	0	0	0	0	0	Unassigned
New,CleanUp,ReferenceOTU23206	0	0	0	0	0	0	0	2.03891e-05	0	0	0	0	0	0	Unassigned
New,CleanUp,ReferenceOTU847048	0	0	0	0	0	0	0	2.03891e-05	0	0	0	0	0	0	Bacteria; Proteobacteria; Epsilonproteobacteria; Campylobacterales; Helicobacteraceae; Sulfurovum; uncultured bacterium
New,CleanUp,ReferenceOTU124777	0	0	0	0	0	0	0	2.03891e-05	0	0	0	0	0	0	Bacteria; Proteobacteria; Epsilonproteobacteria; Campylobacterales; Campylobacteraceae; Thiofractor; uncultured bacterium
New,CleanUp,ReferenceOTU351473	0	0	0	0	0	0	0	2.03891e-05	0	0	0	0	0	0	Bacteria; Proteobacteria; Epsilonproteobacteria; Nautiliales; Nautiliaceae; Lebetimonas
New,CleanUp,ReferenceOTU1018867	0	0	0	0	0	2.04026e-06	0	0	1.8306e-05	0	0	0	0	0	Bacteria; Proteobacteria; Epsilonproteobacteria; Campylobacterales; Helicobacteraceae; Sulfurimonas; uncultured bacterium
New,CleanUp,ReferenceOTU32998	0	0	0	0	0	3.06038e-06	0	1.72523e-05	0	0	0	0	0	0	Bacteria; Proteobacteria; Epsilonproteobacteria; Nautiliales; Nautiliaceae; Lebetimonas
New,CleanUp,ReferenceOTU226381	0	0	0	0	0	3.06038e-06	0	1.72523e-05	0	0	0	0	0	0	Bacteria; Proteobacteria; Epsilonproteobacteria; Nautiliales; Nautiliaceae; Caminibacter; uncultured bacterium
New,CleanUp,ReferenceOTU555849	0	0	0	0	0	0	0	0	0	2.02772e-05	0	0	0	0	Bacteria; Proteobacteria; Epsilonproteobacteria; Nautiliales; Nautiliaceae; Nitratifractor; uncultured bacterium
New,CleanUp,ReferenceOTU251955	0	0	0	0	0	0	0	0	0	2.02772e-05	0	0	0	0	Bacteria; Proteobacteria; Epsilonproteobacteria; Nautiliales; Nautiliaceae; Nitratifractor; uncultured bacterium
New,CleanUp,ReferenceOTU1049402	0	0	0	0	0	0	0	0	0	2.02772e-05	0	0	0	0	Bacteria; Thermodesulfobacteria; Thermodesulfobacteria; Thermodesulfobacteriales; Thermodesulfobacteriaceae; uncultured Thermodesulfobacteriaceae bacterium; uncultured Thermodesulfobacteriaceae bacterium
EU559688,1,946	0	0	0	0	0	0	0	0	0	2.02772e-05	0	0	0	0	Archaea; Crenarchaeota; Thermoprotei; Desulfurococcales; Desulfurococcaceae; Ignisphaera
EU635926,1,1306	0	0	0	0	0	0	0	0	0	2.02772e-05	0	0	0	0	Archaea; Euryarchaeota; Thermoplasmata; Thermoplasmatales; Deep Sea Hydrothermal Vent Gp 2(DHVEG-2); uncultured archaeon; uncultured archaeon
New,CleanUp,ReferenceOTU844802	0	0	0	0	0	0	0	0	0	2.02772e-05	0	0	0	0	Bacteria; Thermodesulfobacteria; Thermodesulfobacteria; Thermodesulfobacteriales; Thermodesulfobacteriaceae; uncultured Thermodesulfobacteriaceae bacterium; uncultured Thermodesulfobacteriaceae bacterium
New,CleanUp,ReferenceOTU784767	0	0	0	0	0	0	0	0	0	2.02772e-05	0	0	0	0	Bacteria; Thermodesulfobacteria; Thermodesulfobacteria; Thermodesulfobacteriales; Thermodesulfobacteriaceae; Thermodesulfatator
New,CleanUp,ReferenceOTU439287	0	0	0	0	0	0	0	0	0	2.02772e-05	0	0	0	0	Bacteria; Proteobacteria; Epsilonproteobacteria; Nautiliales; Nautiliaceae; Nitratifractor; uncultured bacterium
New,CleanUp,ReferenceOTU986152	0	0	0	0	0	0	0	0	0	2.02772e-05	0	0	0	0	Bacteria; Aquificae; Aquificae; Aquificales; Desulfurobacteriaceae; Desulfurobacterium
New,CleanUp,ReferenceOTU100630	0	0	0	0	0	0	0	0	0	2.02772e-05	0	0	0	0	Bacteria; Proteobacteria; Epsilonproteobacteria; Nautiliales; Nautiliaceae; Nitratifractor; uncultured bacterium
New,CleanUp,ReferenceOTU269539	0	0	0	0	0	0	0	0	0	2.02772e-05	0	0	0	0	Bacteria; Proteobacteria; Epsilonproteobacteria; Nautiliales; Nautiliaceae; Nitratifractor
New,CleanUp,ReferenceOTU883850	0	0	0	0	0	0	0	0	0	2.02772e-05	0	0	0	0	Archaea; Euryarchaeota; Thermococci; Thermococcales; Thermococcaceae; Thermococcus
New,CleanUp,ReferenceOTU216654	0	0	0	0	0	0	0	0	0	2.02772e-05	0	0	0	0	Bacteria; Actinobacteria; Actinobacteria; Micrococcales; Bogoriellaceae; Georgenia
New,CleanUp,ReferenceOTU312065	0	0	0	0	0	6.12077e-06	0	1.41155e-05	0	0	0	0	0	0	Bacteria; Proteobacteria; Epsilonproteobacteria; Campylobacterales; Helicobacteraceae; Sulfurimonas; uncultured epsilon proteobacterium
New,CleanUp,ReferenceOTU269485	0	0	0	0	0	9.18115e-06	0	1.09787e-05	0	0	0	0	0	0	Bacteria; Proteobacteria; Epsilonproteobacteria; Campylobacterales; Helicobacteraceae; Sulfurovum; uncultured epsilon proteobacterium
New,CleanUp,ReferenceOTU541298	0	0	0	0	0	2.04026e-06	0	3.13678e-06	1.49777e-05	0	0	0	0	0	Archaea; Euryarchaeota; Thermococci; Thermococcales; Thermococcaceae; Thermococcus
New,CleanUp,ReferenceOTU593899	0	0	0	0	0	2.04026e-06	5.27971e-06	7.84194e-06	4.99255e-06	0	0	0	0	0	Unassigned
AB302404,1,1468	0	0	0	0	0	0	1.8479e-05	0	1.66418e-06	0	0	0	0	0	Bacteria; Aquificae; Aquificae; Aquificales; Aquificaceae; Hydrogenivirga
New,CleanUp,ReferenceOTU386122	0	0	0	0	0	0	0	0	1.66418e-06	1.84339e-05	0	0	0	0	Bacteria; Proteobacteria; Epsilonproteobacteria; Nautiliales; Nautiliaceae; Nitratifractor; uncultured bacterium
New,CleanUp,ReferenceOTU1106326	0	0	0	0	0	1.22415e-05	0	7.84194e-06	0	0	0	0	0	0	Bacteria; Proteobacteria; Epsilonproteobacteria; Campylobacterales; Helicobacteraceae; Sulfurimonas; uncultured bacterium
New,CleanUp,ReferenceOTU159697	0	0	0	0	0	7.1409e-06	0	6.27356e-06	6.65674e-06	0	0	0	0	0	Bacteria; Proteobacteria; Epsilonproteobacteria; Campylobacterales; Helicobacteraceae; Sulfurovum; uncultured epsilon proteobacterium
New,CleanUp,ReferenceOTU178381	0	0	0	0	0	5.10064e-06	3.95978e-06	1.09787e-05	0	0	0	0	0	0	Bacteria; Bacteroidetes; Bacteroidia; Bacteroidales; Marinilabiaceae; uncultured
New,CleanUp,ReferenceOTU104833	0	0	0	0	0	1.83623e-05	0	0	1.66418e-06	0	0	0	0	0	Bacteria; Proteobacteria; Epsilonproteobacteria; Campylobacterales; Helicobacteraceae; Sulfurovum; uncultured epsilon proteobacterium
New,CleanUp,ReferenceOTU791998	0	0	0	0	0	1.53019e-05	0	4.70517e-06	0	0	0	0	0	0	Bacteria; Proteobacteria; Epsilonproteobacteria; Nautiliales; Nautiliaceae; Caminibacter; uncultured bacterium
New,CleanUp,ReferenceOTU62839	0	0	0	0	0	0	0	1.56839e-06	0	1.84339e-05	0	0	0	0	Bacteria; Bacteroidetes; Flavobacteriia; Flavobacteriales; R103-B20; uncultured bacterium; uncultured bacterium
New,CleanUp,ReferenceOTU629312	0	0	0	0	0	3.06038e-06	6.59963e-06	3.13678e-06	1.66418e-06	5.53016e-06	0	0	0	0	Bacteria; BD1-5; uncultured bacterium; uncultured bacterium; uncultured bacterium; uncultured bacterium; uncultured bacterium
New,CleanUp,ReferenceOTU697165	0	0	0	0	0	9.18115e-06	5.27971e-06	0	0	5.53016e-06	0	0	0	0	Unassigned
New,CleanUp,ReferenceOTU362312	0	0	0	0	0	1.02013e-06	1.31993e-06	1.09787e-05	6.65674e-06	0	0	0	0	0	Bacteria; Proteobacteria; Epsilonproteobacteria; Campylobacterales; Helicobacteraceae; Sulfurimonas; uncultured bacterium
New,CleanUp,ReferenceOTU284376	0	0	0	0	0	0	0	0	1.99702e-05	0	0	0	0	0	Unassigned
New,CleanUp,ReferenceOTU7776	0	0	0	0	0	0	0	0	1.99702e-05	0	0	0	0	0	Bacteria; Proteobacteria; Epsilonproteobacteria; Campylobacterales; Helicobacteraceae; Sulfurimonas; uncultured bacterium
New,CleanUp,ReferenceOTU912542	0	0	0	0	0	0	0	0	1.99702e-05	0	0	0	0	0	Bacteria; Proteobacteria; Epsilonproteobacteria; Campylobacterales; Helicobacteraceae; Sulfurimonas; uncultured bacterium
New,CleanUp,ReferenceOTU934610	0	0	0	0	0	0	0	0	1.99702e-05	0	0	0	0	0	Archaea; Euryarchaeota; Thermococci; Thermococcales; Thermococcaceae
New,CleanUp,ReferenceOTU378059	0	0	0	0	0	0	0	0	1.99702e-05	0	0	0	0	0	Archaea; Euryarchaeota; Archaeoglobi; Archaeoglobales; Archaeoglobaceae; Archaeoglobus
New,CleanUp,ReferenceOTU295961	0	0	0	0	0	0	0	0	1.99702e-05	0	0	0	0	0	Bacteria; Aquificae; Aquificae; Aquificales; Hydrogenothermaceae; Sulfurihydrogenibium; uncultured bacterium
New,CleanUp,ReferenceOTU1031938	0	0	0	0	0	0	0	0	1.99702e-05	0	0	0	0	0	Bacteria; Proteobacteria; Epsilonproteobacteria; Campylobacterales; Helicobacteraceae; Sulfurimonas; uncultured bacterium
New,CleanUp,ReferenceOTU700959	0	0	0	0	0	0	0	0	1.99702e-05	0	0	0	0	0	Bacteria; Proteobacteria; Epsilonproteobacteria; Nautiliales; Nautiliaceae
New,CleanUp,ReferenceOTU874326	0	0	0	0	0	0	0	0	1.99702e-05	0	0	0	0	0	Bacteria; Proteobacteria; Epsilonproteobacteria; Campylobacterales; Helicobacteraceae; Sulfurimonas; uncultured bacterium
New,CleanUp,ReferenceOTU250122	0	0	0	0	0	0	0	0	1.99702e-05	0	0	0	0	0	Unassigned
New,CleanUp,ReferenceOTU405001	0	0	3.34133e-06	0	0	1.32617e-05	0	0	3.32837e-06	0	0	0	0	0	Bacteria; Proteobacteria; Epsilonproteobacteria
New,CleanUp,ReferenceOTU681250	0	0	0	0	0	1.83623e-05	0	1.56839e-06	0	0	0	0	0	0	Bacteria; Chloroflexi; uncultured; uncultured bacterium; uncultured bacterium; uncultured bacterium; uncultured bacterium
New,CleanUp,ReferenceOTU371870	0	0	0	0	0	1.12214e-05	3.95978e-06	4.70517e-06	0	0	0	0	0	0	Bacteria; Proteobacteria; Epsilonproteobacteria; Campylobacterales; Campylobacteraceae; Arcobacter; uncultured epsilon proteobacterium
New,CleanUp,ReferenceOTU558149	0	0	0	0	0	0	0	1.56839e-06	1.8306e-05	0	0	0	0	0	Bacteria; Proteobacteria; Gammaproteobacteria; Thiotrichales; Piscirickettsiaceae; Thiomicrospira; uncultured gamma proteobacterium
New,CleanUp,ReferenceOTU90237	0	0	0	0	0	0	0	1.56839e-06	1.8306e-05	0	0	0	0	0	Bacteria; Proteobacteria; Epsilonproteobacteria; Nautiliales; Nautiliaceae; uncultured
New,CleanUp,ReferenceOTU793643	0	0	0	0	0	0	0	1.56839e-06	1.8306e-05	0	0	0	0	0	Bacteria; Proteobacteria; Epsilonproteobacteria; Nautiliales; Nautiliaceae; Thioreductor; uncultured epsilon proteobacterium
New,CleanUp,ReferenceOTU1034824	0	0	0	0	0	5.10064e-06	1.31993e-05	1.56839e-06	0	0	0	0	0	0	Bacteria; Proteobacteria; Alphaproteobacteria; DB1-14; uncultured bacterium; uncultured bacterium; uncultured bacterium
New,CleanUp,ReferenceOTU256604	0	0	1.11378e-06	0	0	5.10064e-06	3.95978e-06	7.84194e-06	0	1.84339e-06	0	0	0	0	Bacteria; Proteobacteria; Epsilonproteobacteria; Campylobacterales; Helicobacteraceae; Sulfurovum; uncultured bacterium
New,CleanUp,ReferenceOTU994825	0	0	0	0	0	1.02013e-05	7.91956e-06	0	1.66418e-06	0	0	0	0	0	Bacteria; Proteobacteria; Epsilonproteobacteria; Campylobacterales; Helicobacteraceae; Sulfurimonas; uncultured bacterium
New,CleanUp,ReferenceOTU234917	0	0	0	0	0	0	0	3.13678e-06	1.66418e-05	0	0	0	0	0	Unassigned
New,CleanUp,ReferenceOTU923486	0	0	0	0	0	0	0	3.13678e-06	1.66418e-05	0	0	0	0	0	Bacteria; Proteobacteria; Gammaproteobacteria; Thiotrichales; Piscirickettsiaceae; Thiomicrospira; uncultured bacterium
New,CleanUp,ReferenceOTU45548	0	0	0	0	0	0	0	3.13678e-06	1.66418e-05	0	0	0	0	0	Bacteria; Proteobacteria; Epsilonproteobacteria; Campylobacterales; Helicobacteraceae; Sulfurimonas; uncultured bacterium
New,CleanUp,ReferenceOTU983496	0	0	0	0	0	4.08051e-06	0	1.56839e-05	0	0	0	0	0	0	Bacteria; Proteobacteria; Epsilonproteobacteria; Nautiliales; Nautiliaceae; Nitratifractor; uncultured bacterium
New,CleanUp,ReferenceOTU605086	0	0	0	0	0	4.08051e-06	0	1.56839e-05	0	0	0	0	0	0	Bacteria; Proteobacteria; Epsilonproteobacteria; Nautiliales; Nautiliaceae; Nitratifractor; uncultured bacterium
New,CleanUp,ReferenceOTU928276	0	0	0	0	0	0	1.31993e-06	0	0	1.84339e-05	0	0	0	0	Bacteria; Aquificae; Aquificae; Aquificales; Desulfurobacteriaceae; Desulfurobacterium
KF624539,1,1362	0	0	0	0	0	0	0	4.70517e-06	1.49777e-05	0	0	0	0	0	Bacteria; Proteobacteria; Epsilonproteobacteria; Campylobacterales; Helicobacteraceae; Sulfurimonas; uncultured bacterium
New,CleanUp,ReferenceOTU731476	0	0	0	0	0	1.63221e-05	0	0	3.32837e-06	0	0	0	0	0	Bacteria; Proteobacteria; Epsilonproteobacteria; Nautiliales; Nautiliaceae
New,CleanUp,ReferenceOTU129246	0	0	0	0	0	0	3.95978e-06	1.56839e-05	0	0	0	0	0	0	Bacteria; Proteobacteria; Epsilonproteobacteria; Campylobacterales; Helicobacteraceae; Sulfurimonas; uncultured bacterium
New,CleanUp,ReferenceOTU338906	0	0	0	0	0	8.16103e-06	0	3.13678e-06	8.32092e-06	0	0	0	0	0	Bacteria; Proteobacteria; Epsilonproteobacteria; Campylobacterales; Helicobacteraceae; Sulfurimonas; uncultured epsilon proteobacterium
New,CleanUp,ReferenceOTU1069099	0	0	0	0	0	1.53019e-05	2.63985e-06	0	1.66418e-06	0	0	0	0	0	Bacteria; Proteobacteria; Epsilonproteobacteria; Nautiliales; Nautiliaceae; Caminibacter; uncultured bacterium
New,CleanUp,ReferenceOTU355617	0	0	0	0	0	0	0	6.27356e-06	1.33135e-05	0	0	0	0	0	Bacteria; Proteobacteria; Epsilonproteobacteria; Campylobacterales; Helicobacteraceae; Sulfurimonas; bacterium enrichment culture clone 16S-9
New,CleanUp,ReferenceOTU112674	0	0	0	0	0	0	0	0	6.65674e-06	1.29037e-05	0	0	0	0	Archaea; Euryarchaeota; Thermococci; Thermococcales; Thermococcaceae
New,CleanUp,ReferenceOTU589099	0	0	0	0	0	1.32617e-05	0	6.27356e-06	0	0	0	0	0	0	Bacteria; Thermodesulfobacteria; Thermodesulfobacteria; Thermodesulfobacteriales; Thermodesulfobacteriaceae; PS-B30; uncultured bacterium
New,CleanUp,ReferenceOTU756678	0	0	0	0	0	1.32617e-05	0	6.27356e-06	0	0	0	0	0	0	Unassigned
New,CleanUp,ReferenceOTU930904	0	0	0	0	0	1.22415e-05	3.95978e-06	0	3.32837e-06	0	0	0	0	0	Bacteria; Proteobacteria; Epsilonproteobacteria; Campylobacterales; Helicobacteraceae; Sulfurimonas; uncultured epsilon proteobacterium
New,CleanUp,ReferenceOTU42812	0	0	0	0	0	6.12077e-06	3.95978e-06	9.41033e-06	0	0	0	0	0	0	Unassigned
New,CleanUp,ReferenceOTU562536	0	0	0	0	0	2.04026e-06	0	1.41155e-05	3.32837e-06	0	0	0	0	0	Bacteria; Proteobacteria; Epsilonproteobacteria; Campylobacterales; Helicobacteraceae; Sulfurovum
New,CleanUp,ReferenceOTU650380	0	0	0	0	0	1.63221e-05	0	3.13678e-06	0	0	0	0	0	0	Bacteria; Proteobacteria; Epsilonproteobacteria; Campylobacterales; Helicobacteraceae; Sulfurovum; uncultured bacterium
New,CleanUp,ReferenceOTU688497	0	0	0	0	0	1.63221e-05	0	3.13678e-06	0	0	0	0	0	0	Bacteria; Proteobacteria; Epsilonproteobacteria; Campylobacterales; Helicobacteraceae; Sulfurovum; uncultured epsilon proteobacterium
New,CleanUp,ReferenceOTU613403	0	0	0	0	0	8.16103e-06	0	6.27356e-06	4.99255e-06	0	0	0	0	0	Bacteria; Proteobacteria; Epsilonproteobacteria; Campylobacterales; Helicobacteraceae; Sulfurimonas; uncultured bacterium
New,CleanUp,ReferenceOTU734488	0	0	0	0	0	3.06038e-06	0	4.70517e-06	1.16493e-05	0	0	0	0	0	Bacteria; Proteobacteria; Epsilonproteobacteria; Campylobacterales; Helicobacteraceae; Sulfurimonas; uncultured bacterium
New,CleanUp,ReferenceOTU717737	0	0	0	0	0	0	5.27971e-06	1.41155e-05	0	0	0	0	0	0	Bacteria; Proteobacteria; Alphaproteobacteria; Rhodobacterales; Rhodobacteraceae; uncultured; uncultured bacterium
New,CleanUp,ReferenceOTU52799	0	0	0	0	0	0	5.27971e-06	1.41155e-05	0	0	0	0	0	0	Bacteria; Proteobacteria; Epsilonproteobacteria; Campylobacterales; Helicobacteraceae; Sulfurovum; uncultured epsilon proteobacterium
New,CleanUp,ReferenceOTU66408	0	0	0	0	0	0	0	1.09787e-05	8.32092e-06	0	0	0	0	0	Bacteria; Proteobacteria; Epsilonproteobacteria; Campylobacterales; Helicobacteraceae; Sulfurovum; uncultured epsilon proteobacterium
New,CleanUp,ReferenceOTU842593	0	0	0	0	0	2.04026e-06	0	1.72523e-05	0	0	0	0	0	0	Bacteria; Proteobacteria; Epsilonproteobacteria; Campylobacterales; Helicobacteraceae; Sulfurovum; uncultured bacterium
New,CleanUp,ReferenceOTU423234	0	0	0	0	0	1.63221e-05	1.31993e-06	1.56839e-06	0	0	0	0	0	0	Bacteria; Proteobacteria; Epsilonproteobacteria; Nautiliales; Nautiliaceae; Lebetimonas
New,CleanUp,ReferenceOTU1047535	0	0	0	0	0	0	6.59963e-06	1.25471e-05	0	0	0	0	0	0	Unassigned
New,CleanUp,ReferenceOTU282804	0	0	0	0	0	8.16103e-06	0	1.09787e-05	0	0	0	0	0	0	Bacteria; Proteobacteria; Deltaproteobacteria; Desulfurellales; Desulfurellaceae; uncultured; uncultured bacterium
New,CleanUp,ReferenceOTU125734	0	0	0	0	0	8.16103e-06	0	1.09787e-05	0	0	0	0	0	0	Unassigned
New,CleanUp,ReferenceOTU817860	0	0	0	0	0	9.18115e-06	0	1.56839e-06	8.32092e-06	0	0	0	0	0	Bacteria; Proteobacteria; Epsilonproteobacteria; Campylobacterales; Campylobacteraceae; Arcobacter; uncultured epsilon proteobacterium
New,CleanUp,ReferenceOTU182344	0	0	0	0	0	0	0	1.56839e-05	3.32837e-06	0	0	0	0	0	Bacteria; Proteobacteria; Epsilonproteobacteria; Campylobacterales; Campylobacteraceae; Sulfurospirillum; uncultured bacterium
New,CleanUp,ReferenceOTU489648	0	0	0	0	0	1.42818e-05	0	4.70517e-06	0	0	0	0	0	0	Bacteria; Proteobacteria; Epsilonproteobacteria; Campylobacterales; Helicobacteraceae; Sulfurovum
New,CleanUp,ReferenceOTU589149	0	0	0	0	0	1.42818e-05	0	4.70517e-06	0	0	0	0	0	0	Unassigned
New,CleanUp,ReferenceOTU1010715	0	0	0	0	0	1.42818e-05	0	4.70517e-06	0	0	0	0	0	0	Bacteria; Proteobacteria; Epsilonproteobacteria; Campylobacterales; Helicobacteraceae; Sulfurovum
New,CleanUp,ReferenceOTU48591	0	0	0	0	0	0	1.58391e-05	3.13678e-06	0	0	0	0	0	0	Bacteria; Proteobacteria; Epsilonproteobacteria; Campylobacterales; Helicobacteraceae; Sulfurimonas; uncultured bacterium
New,CleanUp,ReferenceOTU808314	0	0	0	0	0	6.12077e-06	0	1.09787e-05	0	1.84339e-06	0	0	0	0	Bacteria; Proteobacteria; Epsilonproteobacteria; Nautiliales; Nautiliaceae; Nitratifractor
New,CleanUp,ReferenceOTU459492	0	0	0	0	0	0	0	1.72523e-05	1.66418e-06	0	0	0	0	0	Bacteria; Proteobacteria; Epsilonproteobacteria; Nautiliales; Nautiliaceae; Nitratifractor
New,ReferenceOTU2317	0	0	0	0	0	0	0	1.72523e-05	1.66418e-06	0	0	0	0	0	Bacteria; Proteobacteria; Gammaproteobacteria; Thiotrichales; Piscirickettsiaceae; Thiomicrospira; uncultured bacterium
New,CleanUp,ReferenceOTU775293	0	0	0	0	0	1.73422e-05	0	1.56839e-06	0	0	0	0	0	0	Bacteria; Proteobacteria; Epsilonproteobacteria; Nautiliales; Nautiliaceae; Nitratifractor; uncultured bacterium
New,CleanUp,ReferenceOTU724652	0	0	6.68265e-06	0	0	5.10064e-06	3.95978e-06	3.13678e-06	0	0	0	0	0	0	Bacteria; Proteobacteria; Epsilonproteobacteria; Campylobacterales; Helicobacteraceae; Sulfurovum; uncultured bacterium
New,CleanUp,ReferenceOTU19146	0	0	5.56888e-06	0	0	3.06038e-06	3.95978e-06	6.27356e-06	0	0	0	0	0	0	Bacteria; Bacteroidetes; Cytophagia; Cytophagales; Flammeovirgaceae; uncultured; uncultured bacterium
New,CleanUp,ReferenceOTU683185	0	0	0	0	0	0	0	1.88207e-05	0	0	0	0	0	0	Bacteria; Proteobacteria; Epsilonproteobacteria; Nautiliales; Nautiliaceae; Lebetimonas
New,CleanUp,ReferenceOTU759051	0	0	0	0	0	0	0	1.88207e-05	0	0	0	0	0	0	Unassigned
New,CleanUp,ReferenceOTU53272	0	0	0	0	0	0	0	1.88207e-05	0	0	0	0	0	0	Bacteria; Proteobacteria; Epsilonproteobacteria; Campylobacterales; Helicobacteraceae
New,CleanUp,ReferenceOTU827525	0	0	0	0	0	0	0	1.88207e-05	0	0	0	0	0	0	Unassigned
New,CleanUp,ReferenceOTU453860	0	0	0	0	0	0	0	1.88207e-05	0	0	0	0	0	0	Bacteria; Proteobacteria; Deltaproteobacteria; Desulfurellales; Desulfurellaceae; Hippea; uncultured delta proteobacterium
New,CleanUp,ReferenceOTU514579	0	0	0	0	0	0	0	1.88207e-05	0	0	0	0	0	0	Unassigned
New,CleanUp,ReferenceOTU26008	0	0	0	0	0	0	0	1.88207e-05	0	0	0	0	0	0	Bacteria; Proteobacteria; Epsilonproteobacteria; Campylobacterales; Campylobacteraceae; Thiofractor; uncultured bacterium
New,CleanUp,ReferenceOTU502168	0	0	0	0	0	0	0	1.88207e-05	0	0	0	0	0	0	Bacteria; Proteobacteria; Epsilonproteobacteria; Nautiliales; Nautiliaceae; Nitratifractor
New,CleanUp,ReferenceOTU1072629	0	0	0	0	0	0	0	1.88207e-05	0	0	0	0	0	0	Bacteria; Proteobacteria; Deltaproteobacteria; Desulfobacterales; Desulfobulbaceae; Desulfobulbus; uncultured bacterium
New,CleanUp,ReferenceOTU767337	0	0	0	0	0	0	0	1.88207e-05	0	0	0	0	0	0	Bacteria; Proteobacteria; Epsilonproteobacteria; Campylobacterales; Helicobacteraceae; Sulfurimonas; uncultured bacterium
New,CleanUp,ReferenceOTU729617	0	0	0	0	0	0	0	1.88207e-05	0	0	0	0	0	0	Bacteria; Bacteroidetes; VC2,1 Bac22; uncultured bacterium; uncultured bacterium; uncultured bacterium; uncultured bacterium
New,CleanUp,ReferenceOTU748894	0	0	0	0	0	0	0	1.88207e-05	0	0	0	0	0	0	Unassigned
New,CleanUp,ReferenceOTU768954	0	0	0	0	0	0	0	1.88207e-05	0	0	0	0	0	0	Bacteria
New,CleanUp,ReferenceOTU807117	0	0	0	0	0	0	0	1.88207e-05	0	0	0	0	0	0	Unassigned
[truncated: 11,167 more rows]

## Sheet: Arc OTUs only_active chimney
Supplementary Table S2: exclusive bacterial and archaeal OTUs present in the active or inactive chimneys.
Table S2.2: exclusive archaeal OTUs present in active chimney
	open ocean		plume		sulfide talus	vent fluid		active chimneys			inactive chimneys
#OTU ID	ARF4	ARF1	AF9	AF5	AS3	AF6	AF1	AS5	AS6	AS8	AS7	AS1	AS4	taxonomy
New,ReferenceOTU926	0	0	0	9.09308e-06	0	0.0148943	5.31754e-06	0.00370225	0	0	0	0	0	Unassigned
New,ReferenceOTU116	0	0	9.57747e-07	1.13663e-06	0	0.00697907	3.08417e-05	0.00213088	0	0	0	0	0	Unassigned
New,ReferenceOTU2722	0	1.30454e-06	0	0	0	0.0004541	0	0.00666643	2.60303e-05	3.1717e-06	0	0	0	Unassigned
New,ReferenceOTU795	0.000941746	0.00270562	0.000487493	0.0019175	0	0.000198604	0.000742328	0	0	3.1717e-06	0	0	0	Archaea; Thaumarchaeota; Marine Benthic Group A; Ambiguous_taxa; Ambiguous_taxa; Ambiguous_taxa; Ambiguous_taxa
New,ReferenceOTU430	0	1.30454e-06	0	0	0	0.00028239	1.06351e-06	0.00409271	0	0	0	0	0	Archaea; Aenigmarchaeota; Deep Sea Euryarchaeotic Group(DSEG); unidentified archaeon; unidentified archaeon; unidentified archaeon; unidentified archaeon
DQ300550,1,1263	0.00130504	0.000973188	0.00128147	0.000151172	0	0.000417896	3.29687e-05	0.000114282	0	0	0	0	0	Archaea; Euryarchaeota; Thermoplasmata; Thermoplasmatales; Marine Group II; Ambiguous_taxa; Ambiguous_taxa
New,ReferenceOTU1321	0	0	0	0	0	0	6.38104e-06	0	0	0.00411053	0	0	0	Archaea; Woesearchaeota (DHVEG-6)
JN874210,1,1430	0	0	0	1.13663e-06	0	0.00401035	0	7.1426e-06	0	0	0	0	0	Bacteria; Aquificae; Aquificae; Aquificales; Aquificaceae; uncultured
KP005056,1,1440	0	0	0	2.27327e-06	0	0.00340937	0	4.76173e-06	7.09916e-06	3.1717e-05	0	0	0	Bacteria; Aquificae; Aquificae; Aquificales; Aquificaceae; uncultured
New,ReferenceOTU1866	0	0	1.05352e-05	3.4099e-06	0	0.0033442	0	0	7.09916e-06	0	0	0	0	Unassigned
New,ReferenceOTU3380	0	0	0	0	0	1.0344e-05	0	0.00304513	2.36639e-06	0	0	0	0	Unassigned
New,ReferenceOTU1525	0	0	0	0	0	1.96535e-05	0	0.00286418	0	0	0	0	0	Unassigned
New,CleanUp,ReferenceOTU276300	0	0	0	0	0	8.8958e-05	0	0.00247848	1.89311e-05	0	0	0	0	Unassigned
New,ReferenceOTU1821	0	0	0	0	0	0	0	0.00217849	0	0	0	0	0	Unassigned
New,ReferenceOTU2933	0	0	0	0	0	0.00141816	3.40322e-05	0.000588074	0	0	0	0	0	Unassigned
New,ReferenceOTU291	0	0	0	0	0	0.000625809	0	0.00137852	2.36639e-05	0	0	0	0	Unassigned
New,CleanUp,ReferenceOTU736258	0	0	0	0	0	0	0	0.0019785	0	0	0	0	0	Unassigned
New,ReferenceOTU1582	0	0	0	1.13663e-06	0	0.00195811	1.06351e-06	1.42852e-05	0	0	0	0	0	Unassigned
New,ReferenceOTU2033	0	0	0	0	0	0	0	0	0	0.00191888	0	0	0	Archaea; Nanoarchaeota; Nanoarchaeota Incertae Sedis; Unknown Order; Unknown Family; Nanoarchaeum; Nanoarchaeum equitans
New,CleanUp,ReferenceOTU1025916	0	0	0	0	0	0	5.31754e-06	2.38087e-06	2.36639e-06	0.00188082	0	0	0	Unassigned
JQ222370,1,913	0.000375763	0.000742284	0.000204958	0.000185271	3.5161e-06	7.44765e-05	0.000220146	2.38087e-06	0	0	0	0	0	Archaea; Thaumarchaeota; Marine Group I
New,CleanUp,ReferenceOTU1497318	0	0	0	0	0	7.24077e-06	3.19052e-06	0.00173565	0	3.1717e-06	0	0	0	Unassigned
New,CleanUp,ReferenceOTU117386	0	1.30454e-06	0	1.13663e-06	0	0.00134161	0.000140383	0.000214278	2.36639e-06	0	0	0	0	Unassigned
New,CleanUp,ReferenceOTU303581	0	0	0	0	0	0	0.00018186	0	0.00146953	0	0	0	0	Archaea; Diapherotrites
New,ReferenceOTU2322	0	0	0	0	0	2.06879e-06	0	0.00161899	0	0	0	0	0	Unassigned
New,ReferenceOTU427	0	0	0	0	0	4.13758e-06	0	0.00151185	7.09916e-06	0	0	0	0	Unassigned
New,ReferenceOTU3271	0	0	0	0	0	5.17198e-06	0	0.0014928	0	0	0	0	0	Unassigned
New,ReferenceOTU1841	0.000575338	7.69679e-05	0.00010631	0.000568317	0	0.000125162	2.55242e-05	0	0	3.1717e-06	0	0	0	Unassigned
New,ReferenceOTU3156	0	0	0	0	0	0.00114404	2.12701e-06	0.000314274	0	0	0	0	0	Unassigned
JQ611053,1,924	0	0	0	1.13663e-06	0	0.00144195	0	1.19043e-05	2.36639e-06	0	0	0	0	Archaea; Crenarchaeota; Thermoprotei; Desulfurococcales; Pyrodictiaceae
New,CleanUp,ReferenceOTU1152944	0	0	0	0	0	0.000666151	5.31754e-06	0.000633311	1.18319e-05	0	0	0	0	Bacteria; Thermotogae; Thermotogae; Mesoaciditogales; Mesoaciditogaceae; Mesoaciditoga; Ambiguous_taxa
New,ReferenceOTU1710	0	0	0	0	0	0	0	0.00125948	0	0	0	0	0	Unassigned
New,CleanUp,ReferenceOTU319183	0	0	0	0	0	0	0	0	0	0.00122745	0	0	0	Unassigned
New,ReferenceOTU2926	0	0	0	0	0	0.00064236	0	0.000566646	0	0	0	0	0	Unassigned
New,ReferenceOTU276	0	0	0	0	0	0.00025653	0	0.000938062	0	0	0	0	0	Unassigned
New,ReferenceOTU1001	0	0	0	0	0	0	0	0.00112615	0	0	0	0	0	Unassigned
New,ReferenceOTU1579	0	0	0	0	0	0.000318594	1.06351e-06	0	0	0.000739007	0	0	0	Unassigned
New,ReferenceOTU429	0	0	0	0	0	0	0	0.0010333	0	0	0	0	0	Unassigned
New,ReferenceOTU2583	0	0	0	0	0	0	0	0	0	0.00102763	0	0	0	Unassigned
New,CleanUp,ReferenceOTU1581489	0	0	0	0	0	0	8.50806e-06	0	2.36639e-06	0.0010086	0	0	0	Archaea; Miscellaneous Euryarchaeotic Group(MEG); uncultured archaeon; uncultured archaeon; uncultured archaeon; uncultured archaeon; uncultured archaeon
New,ReferenceOTU2841	0	0	0	0	0	0.000835792	1.38256e-05	0	0.000141983	0	0	0	0	Archaea; Diapherotrites
EU635926,1,1306	0	0	0	0	0	0	5.31754e-06	0	0	0.000935652	0	0	0	Archaea; Euryarchaeota; Thermoplasmata; Thermoplasmatales; Deep Sea Hydrothermal Vent Gp 2(DHVEG-2); uncultured archaeon; uncultured archaeon
New,ReferenceOTU1820	0	0	0	0	0	0	0	0	0.000920525	0	0	0	0	Unassigned
New,ReferenceOTU453	0	0	0	0	0	0	0	0	0	0.000919794	0	0	0	Unassigned
New,CleanUp,ReferenceOTU1519680	0	0	0	0	0	2.27567e-05	0	0.000885683	0	0	0	0	0	Unassigned
New,ReferenceOTU1279	0	0	0	0	0	0	0	0.000895206	0	0	0	0	0	Unassigned
New,CleanUp,ReferenceOTU1328432	0	0	0	0	0	0	2.02066e-05	2.38087e-06	1.41983e-05	0.000824643	0	0	0	Archaea; Euryarchaeota; Methanococci; Methanococcales; Methanocaldococcaceae; Methanocaldococcus
New,ReferenceOTU1109	0	0	0	0	0	0.000159297	0	0.000676166	0	0	0	0	0	Archaea; Euryarchaeota; Thermococci; Thermococcales; Thermococcaceae
New,ReferenceOTU2773	0	0	0	0	0	0.000725111	0	7.1426e-06	0	0	0	0	0	Unassigned
New,CleanUp,ReferenceOTU865389	0	0	5.74648e-06	0	0	0	7.97631e-05	2.38087e-06	0	0.000640684	0	0	0	Unassigned
New,CleanUp,ReferenceOTU978256	0	0	0	0	0	0	0	0.000723784	0	0	0	0	0	Unassigned
New,CleanUp,ReferenceOTU361454	0	0	0	0	0	3.10319e-06	0	0.000702356	0	0	0	0	0	Unassigned
AB247825,1,942	0	0	0	0	0	0.000669254	2.12701e-06	2.61895e-05	4.73278e-06	0	0	0	0	Archaea; Crenarchaeota; Thermoprotei; Desulfurococcales; Desulfurococcaceae; Aeropyrum
New,CleanUp,ReferenceOTU661599	0	0	0	0	0	0	7.01915e-05	2.38087e-06	0	0.000570907	0	0	0	Unassigned
New,ReferenceOTU2181	0	0	0	0	0	0.000441687	7.7636e-05	0.000116663	0	0	0	0	0	Unassigned
New,CleanUp,ReferenceOTU368230	0	0	0	0	0	0	0	0.000626168	0	0	0	0	0	Unassigned
New,CleanUp,ReferenceOTU665065	0	0	0	0	0	2.27567e-05	1.06351e-06	2.85704e-05	6.62589e-05	0.000472584	0	0	0	Unassigned
HQ834249,1,1428	0	0	0	0	0	0.000543058	0	1.19043e-05	3.31294e-05	0	0	0	0	Archaea; Euryarchaeota; Thermococci; Thermococcales; Thermococcaceae
New,CleanUp,ReferenceOTU705186	0	0	0	0	0	0.000509957	3.82863e-05	2.14278e-05	0	0	0	0	0	Unassigned
New,CleanUp,ReferenceOTU1112956	0	0	0	0	0	0	0	0	0	0.000536018	0	0	0	Archaea; Euryarchaeota; Thermoplasmata; Thermoplasmatales; VC2,1 Arc6; uncultured euryarchaeote; uncultured euryarchaeote
New,ReferenceOTU1910	0	0	0	0	0	0.000389967	5.31754e-06	0.000126186	2.36639e-06	0	0	0	0	Unassigned
New,ReferenceOTU457	0	0	0	0	0	3.41351e-05	0	0.000147614	0.000326562	9.51511e-06	0	0	0	Archaea; Euryarchaeota; Thermococci; Thermococcales; Thermococcaceae; Thermococcus
New,CleanUp,ReferenceOTU1638396	0	0	0	0	0	1.24127e-05	0	1.90469e-05	0.000482743	0	0	0	0	Unassigned
New,CleanUp,ReferenceOTU635464	0	0	0	0	0	0	0	0	0	0.000513816	0	0	0	Archaea; Marine Hydrothermal Vent Group 1(MHVG-1); uncultured archaeon; uncultured archaeon; uncultured archaeon; uncultured archaeon; uncultured archaeon
AB293236,1,1320	0	0	0	0	0	3.10319e-06	0	0.000238087	0.000217708	3.80604e-05	0	0	0	Archaea; Euryarchaeota; Archaeoglobi; Archaeoglobales; Archaeoglobaceae; uncultured
New,ReferenceOTU2859	0	0	0	0	0	3.10319e-06	0	0.000249991	0.000208242	2.53736e-05	0	0	0	Archaea; Euryarchaeota; Archaeoglobi; Archaeoglobales; Archaeoglobaceae; uncultured
FR852970,1,1474	0	0	0	0	0	0	0	0.000476173	2.36639e-06	0	0	0	0	Bacteria; Proteobacteria; Epsilonproteobacteria; Campylobacterales; Helicobacteraceae; Sulfurovum; Ambiguous_taxa
New,CleanUp,ReferenceOTU622098	0	0	0	0	0	0.000434446	1.06351e-06	1.90469e-05	0	0	0	0	0	Unassigned
FR852918,1,937	0	0	0	0	0	0.000436515	0	0	0	1.26868e-05	0	0	0	Archaea; Crenarchaeota; Thermoprotei; Desulfurococcales; Desulfurococcaceae; uncultured; uncultured archaeon
New,CleanUp,ReferenceOTU950445	0	0	0	0	0	0	0	0.000447603	0	0	0	0	0	Unassigned
New,ReferenceOTU3100	0	0	0	2.27327e-06	0	0.00039307	2.23337e-05	0	0	2.53736e-05	0	0	0	Unassigned
New,CleanUp,ReferenceOTU478062	0	0	0	0	0	0	0	5.47599e-05	0.000388088	0	0	0	0	Unassigned
AR271569,832441,833906	0	0	0	0	0	2.06879e-06	8.72076e-05	0	0	0.000348887	0	0	0	Archaea; Euryarchaeota; Methanococci; Methanococcales; Methanocaldococcaceae; Methanocaldococcus; Ambiguous_taxa
New,CleanUp,ReferenceOTU1665599	0	0	0	0	2.57847e-05	0.000409621	0	2.38087e-06	0	0	0	0	0	Unassigned
New,CleanUp,ReferenceOTU1563998	0	0	0	0	0	0	0	0.000426175	2.36639e-06	3.1717e-06	0	0	0	Unassigned
New,ReferenceOTU1047	0	0	0	0	0	0	0	0.000419033	2.36639e-06	0	0	0	0	Unassigned
New,CleanUp,ReferenceOTU882105	0	0	0	0	0	2.06879e-06	0	0.000226182	0.000189311	0	0	0	0	Archaea; Euryarchaeota; Archaeoglobi; Archaeoglobales; Archaeoglobaceae; uncultured
New,ReferenceOTU1360	0	0	0	0	0	0	0	0	0	0.000415493	0	0	0	Unassigned
New,CleanUp,ReferenceOTU462606	0	0	0	0	0	1.0344e-06	4.04133e-05	1.19043e-05	2.36639e-05	0.000333029	0	0	0	Unassigned
New,CleanUp,ReferenceOTU65214	1.55918e-06	0	0	0	0	4.13758e-06	0	0	3.54958e-05	0.000364746	0	0	0	Archaea; Nanoarchaeota; Nanoarchaeota Incertae Sedis; Unknown Order; Unknown Family; Nanoarchaeum; uncultured nanoarchaeote
New,ReferenceOTU2519	0	0	0	0	0	7.65453e-05	0.000198876	0.000116663	0	0	0	0	0	Unassigned
AB175577,1,937	0	0	0	0	0	0	0	0	0	0.000383776	0	0	0	Archaea; Crenarchaeota; Thermoprotei; Thermoproteales; Thermofilaceae; Thermofilum
New,CleanUp,ReferenceOTU904822	0	0	0	0	0	0.000267908	2.12701e-06	0.000111901	0	0	0	0	0	Unassigned
New,CleanUp,ReferenceOTU945421	0	0	0	0	0	0	1.06351e-06	0	0	0.000371089	0	0	0	Unassigned
New,ReferenceOTU2508	0	0	0	0	0	1.65503e-05	0	0.000119043	4.49614e-05	0.000174444	0	0	0	Archaea; Nanoarchaeota; Nanoarchaeota Incertae Sedis; Unknown Order; Unknown Family; Nanoarchaeum; uncultured nanoarchaeote
New,ReferenceOTU287	0	0	0	0	0	0.000124127	0	0.000228563	0	0	0	0	0	Unassigned
New,ReferenceOTU2330	0	0	0	0	0	1.0344e-06	1.59526e-05	0.000335702	0	0	0	0	0	Unassigned
KP091047,1,1469	0	0	0	0	0	0	0	0	4.73278e-06	0.000345716	0	0	0	Archaea; Euryarchaeota; Archaeoglobi; Archaeoglobales; Archaeoglobaceae; Archaeoglobus; uncultured archaeon
FR852928,1,937	0	0	0	0	0	0.000271012	0	0	3.0763e-05	4.44038e-05	0	0	0	Archaea; Crenarchaeota; Thermoprotei; Desulfurococcales; Desulfurococcaceae; uncultured; Ambiguous_taxa
New,CleanUp,ReferenceOTU170716	0	0	0	0	0	0	0	0.000345226	0	0	0	0	0	Unassigned
New,CleanUp,ReferenceOTU1298359	0	0	0	0	0	0	0	0	0	0.000336201	0	0	0	Unassigned
New,ReferenceOTU1025	0	0	0	0	0	1.0344e-06	0	0	0	0.000333029	0	0	0	Archaea; Crenarchaeota; Thermoprotei; Desulfurococcales; Desulfurococcaceae
New,CleanUp,ReferenceOTU1262715	0	0	0	0	0	0	0	0.000333321	0	0	0	0	0	Unassigned
New,CleanUp,ReferenceOTU1216488	0	0	0	0	0	1.0344e-05	0	0.000102377	3.54958e-05	0.000177615	0	0	0	Archaea; Nanoarchaeota; Nanoarchaeota Incertae Sedis; Unknown Order; Unknown Family; Nanoarchaeum; uncultured nanoarchaeote
New,CleanUp,ReferenceOTU722896	0	0	0	0	0	0	0	0.000321417	0	0	0	0	0	Unassigned
New,ReferenceOTU946	0	0	0	0	0	0	0	0	0	0.000313999	0	0	0	Unassigned
New,ReferenceOTU1126	0	0	0	0	0	0	0	0.000309513	0	0	0	0	0	Unassigned
New,CleanUp,ReferenceOTU788246	0	0	0	0	0	0	0	0.000309513	0	0	0	0	0	Unassigned
New,CleanUp,ReferenceOTU555809	0	0	0	0	0	4.34446e-05	0	0	0	0.000263251	0	0	0	Archaea; Crenarchaeota; Thermoprotei; Desulfurococcales; Desulfurococcaceae
New,CleanUp,ReferenceOTU1628640	0	0	0	0	0	1.13784e-05	0	0.000290466	4.73278e-06	0	0	0	0	Archaea; Euryarchaeota; Thermoplasmata; Thermoplasmatales; Deep Sea Hydrothermal Vent Gp 2(DHVEG-2); Ambiguous_taxa; Ambiguous_taxa
New,CleanUp,ReferenceOTU49048	0	0	0	0	0	0	0	0.000304751	0	0	0	0	0	Unassigned
FM242724,1,1152	0	0	0	2.27327e-06	0	0.000278252	3.19052e-06	0	0	1.58585e-05	0	0	0	Archaea; Crenarchaeota; Thermoprotei; Desulfurococcales; Desulfurococcaceae; Thermodiscus
New,CleanUp,ReferenceOTU1136029	0	0	0	0	0	0.00028239	5.31754e-06	0	4.73278e-06	0	0	0	0	Archaea; Crenarchaeota; Thermoprotei; a87Y42
New,CleanUp,ReferenceOTU464545	0	0	0	0	0	0	0	0.000285704	0	3.1717e-06	0	0	0	Unassigned
New,CleanUp,ReferenceOTU1092410	0	0	0	0	0	0	0	0.000280942	0	0	0	0	0	Bacteria; Acidobacteria; Holophagae; Acanthopleuribacterales; Acanthopleuribacteraceae; Thermotomaculum
JF738091,1,930	0	0	0	0	0	0	1.06351e-06	0	0.000272135	0	0	0	0	Archaea; Euryarchaeota; Archaeoglobi; Archaeoglobales; Archaeoglobaceae; uncultured; uncultured archaeon
New,CleanUp,ReferenceOTU545993	0	0	0	0	0	0	0	0.000271419	0	0	0	0	0	Unassigned
New,ReferenceOTU2901	0	0	0	0	0	2.06879e-06	0	0.000140471	0.000115953	1.26868e-05	0	0	0	Archaea; Euryarchaeota; Archaeoglobi; Archaeoglobales; Archaeoglobaceae; uncultured
New,CleanUp,ReferenceOTU499185	0	0	0	0	0	0	0	0.000269038	0	0	0	0	0	Unassigned
New,ReferenceOTU2157	0	0	0	0	0	0.000233773	0	0	3.31294e-05	0	0	0	0	Archaea; Nanoarchaeota; Nanoarchaeota Incertae Sedis; Unknown Order; Unknown Family; Nanoarchaeum; Nanoarchaeum equitans
New,CleanUp,ReferenceOTU378004	0	1.30454e-06	0	0	0	1.0344e-06	0.000252051	1.19043e-05	0	0	0	0	0	Unassigned
New,CleanUp,ReferenceOTU1323	0	0	0	0	0	0.000249289	5.31754e-06	7.1426e-06	0	0	0	0	0	Archaea; Aenigmarchaeota; Aenigmarchaeota Incertae Sedis; Unknown Order; Unknown Family; Candidatus Aenigmarchaeum; uncultured euryarchaeote
New,CleanUp,ReferenceOTU1623314	0	0	0	0	0	0	0	0.000249991	0	0	0	0	0	Unassigned
New,ReferenceOTU935	0	0	0	0	0	1.0344e-05	0	0.000233325	0	0	0	0	0	Archaea; Euryarchaeota; Thermoplasmata; Thermoplasmatales; AMOS1A-4113-D04; uncultured archaeon; uncultured archaeon
New,CleanUp,ReferenceOTU1411009	0	0	0	0	0	8.27517e-06	0	0.000233325	0	0	0	0	0	Unassigned
New,CleanUp,ReferenceOTU217328	0	0	0	0	0	0	1.27621e-05	0	0	0.000222019	0	0	0	Archaea; Woesearchaeota (DHVEG-6); uncultured crenarchaeote; uncultured crenarchaeote; uncultured crenarchaeote; uncultured crenarchaeote; uncultured crenarchaeote
New,CleanUp,ReferenceOTU484250	0	0	0	0	0	0	0	2.38087e-05	9.46555e-06	0.000196646	0	0	0	Unassigned
New,CleanUp,ReferenceOTU212931	0	0	0	0	0	0	4.25403e-06	0	0	0.000222019	0	0	0	Archaea; Euryarchaeota; Thermoplasmata; Thermoplasmatales; Deep Sea Hydrothermal Vent Gp 2(DHVEG-2); uncultured archaeon; uncultured archaeon
New,CleanUp,ReferenceOTU475159	0	0	0	0	0	0	0	0.000226182	0	0	0	0	0	Unassigned
New,CleanUp,ReferenceOTU1521229	0	0	0	0	0	0	0	0	0.000220074	3.1717e-06	0	0	0	Unassigned
New,CleanUp,ReferenceOTU1626745	0	0	0	0	0	0	0	0.00021904	0	0	0	0	0	Unassigned
New,ReferenceOTU1017	0	0	0	0	0	3.72382e-05	0	0.000176184	0	0	0	0	0	Archaea; Euryarchaeota; Thermococci; Thermococcales; Thermococcaceae; Palaeococcus; Ambiguous_taxa
New,CleanUp,ReferenceOTU1783293	0	0	0	0	0	0	0	0	0.000210609	0	0	0	0	Unassigned
New,CleanUp,ReferenceOTU1000841	0	0	0	0	0	3.10319e-06	1.06351e-06	0	0.00011122	9.51511e-05	0	0	0	Archaea; Crenarchaeota; Thermoprotei; Desulfurococcales; Desulfurococcaceae; uncultured; uncultured archaeon
EU559680,1,970	0	0	0	0	0	7.24077e-06	1.06351e-06	0	4.73278e-05	0.00014907	0	0	0	Archaea; Crenarchaeota; Thermoprotei; Thermoproteales; Thermoproteaceae; uncultured
New,CleanUp,ReferenceOTU523418	0	0	0	0	0	0	0	0.000202374	0	0	0	0	0	Unassigned
New,ReferenceOTU2871	0	0	0	0	0	0.00017171	2.12701e-06	2.38087e-06	2.36639e-05	0	0	0	0	Archaea; Nanoarchaeota; Nanoarchaeota Incertae Sedis; Unknown Order; Unknown Family; Nanoarchaeum; uncultured nanoarchaeote
New,CleanUp,ReferenceOTU413518	0	0	0	0	0	0	0	0	0	0.000199817	0	0	0	Unassigned
New,CleanUp,ReferenceOTU282613	0	0	6.70423e-06	0	0	0.000149987	0	3.5713e-05	0	0	0	0	0	Unassigned
New,CleanUp,ReferenceOTU329515	0	0	0	0	0	0	0	0.000190469	0	0	0	0	0	Unassigned
New,CleanUp,ReferenceOTU1501501	0	0	0	0	0	1.24127e-05	1.70161e-05	0.000154756	0	0	0	0	0	Unassigned
New,ReferenceOTU499	0	0	0	0	0	0	0	0	0	0.000183959	0	0	0	Archaea; Woesearchaeota (DHVEG-6)
New,CleanUp,ReferenceOTU953898	0	0	0	0	0	0	0	0	0	0.000180787	0	0	0	Unassigned
New,CleanUp,ReferenceOTU709554	0	0	0	0	0	0	0	0	0	0.000177615	0	0	0	Archaea; Crenarchaeota; Thermoprotei; Desulfurococcales; Desulfurococcaceae
New,ReferenceOTU2234	0	0	0	0	0	0	0	9.0473e-05	7.3358e-05	1.26868e-05	0	0	0	Archaea; Euryarchaeota; Archaeoglobi; Archaeoglobales; Archaeoglobaceae; uncultured
New,CleanUp,ReferenceOTU1507012	0	0	0	0	0	0	0	0.000176184	0	0	0	0	0	Unassigned
New,ReferenceOTU940	0	0	0	0	0	6.20637e-06	0	4.52365e-05	2.36639e-06	0.000120525	0	0	0	Archaea; Euryarchaeota; Thermococci; Thermococcales; Thermococcaceae; Thermococcus
New,CleanUp,ReferenceOTU1813037	0	0	0	0	0	0.000157228	0	1.66661e-05	0	0	0	0	0	Unassigned
New,CleanUp,ReferenceOTU1427815	0	1.30454e-06	0	0	0	0	0.000161653	0	0	6.34341e-06	0	0	0	Archaea; Euryarchaeota; Methanococci; Methanococcales; Methanocaldococcaceae; Methanocaldococcus; Ambiguous_taxa
New,CleanUp,ReferenceOTU10229	0	0	0	0	0	0	0	0.00016428	0	0	0	0	0	Unassigned
New,CleanUp,ReferenceOTU986201	0	0	0	0	0	0.000154125	0	2.38087e-06	0	0	0	0	0	Archaea; Euryarchaeota; Thermoplasmata; Thermoplasmatales; Deep Sea Hydrothermal Vent Gp 2(DHVEG-2)
AY280439,1,1023	0	0	0	0	0	0	1.27621e-05	0	0	0.000142727	0	0	0	Archaea; Diapherotrites; uncultured euryarchaeote; uncultured euryarchaeote; uncultured euryarchaeote; uncultured euryarchaeote; uncultured euryarchaeote
New,CleanUp,ReferenceOTU1106161	0	0	0	0	0	0	0	0.000154756	0	0	0	0	0	Unassigned
New,CleanUp,ReferenceOTU62421	0	0	0	0	0	0	0	0.000154756	0	0	0	0	0	Unassigned
New,CleanUp,ReferenceOTU1862855	0	0	0	0	0	0	0	0.000149995	4.73278e-06	0	0	0	0	Unassigned
New,CleanUp,ReferenceOTU1707543	0	0	9.57747e-07	0	0	6.20637e-06	0	4.52365e-05	1.65647e-05	8.5636e-05	0	0	0	Archaea; Nanoarchaeota; Nanoarchaeota Incertae Sedis; Unknown Order; Unknown Family; Nanoarchaeum; uncultured nanoarchaeote
New,ReferenceOTU3264	0	0	0	0	0	0	0	9.76156e-05	4.73278e-05	9.51511e-06	0	0	0	Archaea; Euryarchaeota; Archaeoglobi; Archaeoglobales; Archaeoglobaceae; uncultured
New,CleanUp,ReferenceOTU632658	0	0	0	0	0	1.0344e-05	0.000139319	2.38087e-06	2.36639e-06	0	0	0	0	Unassigned
New,CleanUp,ReferenceOTU138096	0	0	0	0	0	3.10319e-06	0	0.000147614	0	0	0	0	0	Unassigned
New,ReferenceOTU2893	0	0	0	0	0	0	0	0.000149995	0	0	0	0	0	Unassigned
New,CleanUp,ReferenceOTU371981	0	0	0	0	0	0.000143781	0	2.38087e-06	2.36639e-06	0	0	0	0	Archaea; Crenarchaeota; Thermoprotei; Desulfurococcales; Desulfurococcaceae; Aeropyrum; Ambiguous_taxa
New,ReferenceOTU1134	0	0	0	0	0	0	0	9.0473e-05	5.44269e-05	3.1717e-06	0	0	0	Archaea; Euryarchaeota; Archaeoglobi; Archaeoglobales; Archaeoglobaceae; uncultured
New,ReferenceOTU52	0	0	0	1.13663e-06	0	0.000139643	0	7.1426e-06	0	0	0	0	0	Unassigned
New,CleanUp,ReferenceOTU931186	0	0	0	0	0	0	0	2.38087e-06	9.46555e-05	5.07473e-05	0	0	0	Archaea; Crenarchaeota; Thermoprotei; Desulfurococcales; Desulfurococcaceae; uncultured; uncultured archaeon
New,CleanUp,ReferenceOTU595242	0	0	0	0	0	0	0	0	0	0.000145898	0	0	0	Unassigned
DQ228617,1,1353	0	0	0	0	0	0	0	6.66643e-05	7.57244e-05	3.1717e-06	0	0	0	Archaea; Euryarchaeota; Archaeoglobi; Archaeoglobales; Archaeoglobaceae; uncultured
New,CleanUp,ReferenceOTU744535	0	0	0	0	0	1.0344e-06	0	6.42834e-05	6.38925e-05	1.58585e-05	0	0	0	Archaea; Euryarchaeota; Archaeoglobi; Archaeoglobales; Archaeoglobaceae; uncultured
FR852940,1,938	0	0	0	0	0	0	0	0	7.80908e-05	6.66058e-05	0	0	0	Archaea; Crenarchaeota; Thermoprotei; Desulfurococcales; Desulfurococcaceae; uncultured; uncultured archaeon
GQ410852,1,930	0	0	0	0	0	0	7.44455e-06	0	0	0.000136383	0	0	0	Archaea; Lokiarchaeota; uncultured archaeon; uncultured archaeon; uncultured archaeon; uncultured archaeon; uncultured archaeon
New,CleanUp,ReferenceOTU434772	0	0	0	0	0	1.34471e-05	0	0.000128567	0	0	0	0	0	Archaea; Euryarchaeota; Thermoplasmata; Thermoplasmatales; Deep Sea Hydrothermal Vent Gp 2(DHVEG-2); Ambiguous_taxa; Ambiguous_taxa
New,CleanUp,ReferenceOTU38827	0	0	0	0	0	1.0344e-06	0	0	7.09916e-06	0.000133212	0	0	0	Archaea; Crenarchaeota; Thermoprotei; Desulfurococcales; Desulfurococcaceae; uncultured; uncultured archaeon
New,CleanUp,ReferenceOTU103204	0	0	0	0	0	6.30981e-05	5.42389e-05	2.38087e-05	0	0	0	0	0	Unassigned
New,CleanUp,ReferenceOTU89596	0	0	0	0	0	4.34446e-05	0	9.76156e-05	0	0	0	0	0	Unassigned
New,CleanUp,ReferenceOTU1314440	0	0	0	0	0	0	0	0.000135709	0	0	0	0	0	Unassigned
New,CleanUp,ReferenceOTU193652	0	0	0	0	0	0	1.06351e-06	0	1.18319e-05	0.000120525	0	0	0	Unassigned
New,ReferenceOTU919	0	0	0	0	0	0	0	0.000133329	0	0	0	0	0	Unassigned
New,CleanUp,ReferenceOTU1573936	0	0	0	0	0	0	0	0.000133329	0	0	0	0	0	Unassigned
New,ReferenceOTU418	0	0	0	0	0	0	0	7.1426e-05	6.15261e-05	0	0	0	0	Archaea; Euryarchaeota; Archaeoglobi; Archaeoglobales; Archaeoglobaceae; uncultured
New,CleanUp,ReferenceOTU497401	0	0	0	0	0	0	0	0	2.36639e-06	0.00013004	0	0	0	Archaea; Euryarchaeota; Methanococci; Methanococcales; Methanocaldococcaceae; Methanocaldococcus; Ambiguous_taxa
New,CleanUp,ReferenceOTU1716932	0	0	0	0	0	0	0	0.000130948	0	0	0	0	0	Unassigned
New,CleanUp,ReferenceOTU252694	0	0	0	0	0	1.0344e-06	0	0	7.57244e-05	5.3919e-05	0	0	0	Archaea; Crenarchaeota; Thermoprotei; Desulfurococcales; Desulfurococcaceae; uncultured; uncultured archaeon
New,CleanUp,ReferenceOTU832767	0	0	0	0	0	0	0	0	0	0.00013004	0	0	0	Unassigned
New,CleanUp,ReferenceOTU779711	0	0	0	0	0	1.0344e-06	0	0	4.73278e-06	0.000123696	0	0	0	Archaea; Nanoarchaeota; Nanoarchaeota Incertae Sedis; Unknown Order; Unknown Family; Nanoarchaeum; uncultured nanoarchaeote
New,ReferenceOTU141	0	0	0	0	0	1.0344e-06	0	0	7.09916e-05	5.70907e-05	0	0	0	Archaea; Crenarchaeota; Thermoprotei; Thermoproteales; Thermoproteaceae; uncultured
New,CleanUp,ReferenceOTU831873	0	0	0	0	0	0	0	0.000128567	0	0	0	0	0	Unassigned
New,CleanUp,ReferenceOTU1458622	0	0	0	0	0	0	0	2.61895e-05	0	9.83228e-05	0	0	0	Unassigned
New,ReferenceOTU1739	0	0	0	0	0	0	0	0	7.09916e-06	0.000117353	0	0	0	Unassigned
New,CleanUp,ReferenceOTU345867	0	0	0	0	0	0	0	0.000123805	0	0	0	0	0	Unassigned
New,CleanUp,ReferenceOTU1152338	0	0	0	0	0	0	0	2.38087e-06	0	0.000120525	0	0	0	Unassigned
New,CleanUp,ReferenceOTU1061704	0	0	0	0	0	1.0344e-06	0	0.000121424	0	0	0	0	0	Unassigned
New,CleanUp,ReferenceOTU258657	0	0	0	0	0	1.0344e-06	0	0	6.38925e-05	5.70907e-05	0	0	0	Archaea; Crenarchaeota; Thermoprotei; Desulfurococcales; Desulfurococcaceae; uncultured; uncultured archaeon
New,CleanUp,ReferenceOTU581237	0	0	0	0	0	0	0	0.000121424	0	0	0	0	0	Unassigned
New,ReferenceOTU811	1.7151e-05	1.30454e-06	0	0	0	0	9.57157e-05	0	0	6.34341e-06	0	0	0	Unassigned
New,ReferenceOTU1588	0	0	0	0	0	1.0344e-06	0	0	7.09916e-05	4.75755e-05	0	0	0	Archaea; Crenarchaeota; Thermoprotei; Desulfurococcales; Desulfurococcaceae; uncultured; uncultured archaeon
New,CleanUp,ReferenceOTU36035	0	0	0	0	0	0	0	0	0	0.000117353	0	0	0	Unassigned
New,CleanUp,ReferenceOTU924171	0	0	0	0	0	0	0	0.000116663	0	0	0	0	0	Unassigned
New,ReferenceOTU2012	0	0	0	0	0	1.13784e-05	0	0.000102377	0	0	0	0	0	Archaea; Euryarchaeota; Thermoplasmata; Thermoplasmatales; Deep Sea Hydrothermal Vent Gp 2(DHVEG-2); Ambiguous_taxa; Ambiguous_taxa
New,CleanUp,ReferenceOTU85997	0	0	0	0	0	4.13758e-06	0	0.00010952	0	0	0	0	0	Unassigned
New,ReferenceOTU2962	0	0	0	0	0	0	0	6.66643e-05	4.02286e-05	6.34341e-06	0	0	0	Archaea; Euryarchaeota; Archaeoglobi; Archaeoglobales; Archaeoglobaceae; uncultured
New,CleanUp,ReferenceOTU1838887	0	0	0	0	0	0	0	0.000111901	0	0	0	0	0	Unassigned
New,CleanUp,ReferenceOTU1578009	0	0	0	0	0	0	0	0.00010952	0	0	0	0	0	Unassigned
New,CleanUp,ReferenceOTU280501	0	0	0	0	0	0	0	1.42852e-05	9.46555e-05	0	0	0	0	Unassigned
New,CleanUp,ReferenceOTU677660	0	0	0	0	0	0	0	0.000107139	0	0	0	0	0	Unassigned
New,CleanUp,ReferenceOTU1496716	0	0	0	0	0	0	0	0.000107139	0	0	0	0	0	Unassigned
New,ReferenceOTU822	0	0	0	0	0	0	1.06351e-06	6.42834e-05	2.12975e-05	1.90302e-05	0	0	0	Unassigned
New,CleanUp,ReferenceOTU1556691	0	0	0	0	0	9.9302e-05	2.12701e-06	0	0	3.1717e-06	0	0	0	Archaea; Diapherotrites
New,CleanUp,ReferenceOTU590746	0	0	0	0	0	0	2.12701e-06	0	0.000101755	0	0	0	0	Archaea; Euryarchaeota; Archaeoglobi; Archaeoglobales; Archaeoglobaceae; uncultured
New,CleanUp,ReferenceOTU1175630	0	0	0	0	0	0	0	0.000102377	0	0	0	0	0	Unassigned
New,ReferenceOTU745	0	0	0	0	0	8.17173e-05	7.44455e-06	0	0	1.26868e-05	0	0	0	Unassigned
New,CleanUp,ReferenceOTU1108959	0	0	0	0	0	5.89606e-05	0	4.28556e-05	0	0	0	0	0	Unassigned
New,CleanUp,ReferenceOTU1210010	0	0	0	0	0	0	5.31754e-06	0	0	9.51511e-05	0	0	0	Unassigned
New,CleanUp,ReferenceOTU1187032	0	0	0	0	0	0	0	9.99964e-05	0	0	0	0	0	Unassigned
New,CleanUp,ReferenceOTU499529	0	0	0	0	0	0	0	0	5.20605e-05	4.75755e-05	0	0	0	Archaea; Crenarchaeota; Thermoprotei; Desulfurococcales; Desulfurococcaceae; uncultured; uncultured archaeon
New,CleanUp,ReferenceOTU1759692	0	0	0	0	0	0	0	0	9.93883e-05	0	0	0	0	Archaea; Euryarchaeota; Archaeoglobi; Archaeoglobales; Archaeoglobaceae; uncultured
New,CleanUp,ReferenceOTU1221404	0	0	0	0	0	8.27517e-06	0	1.90469e-05	6.86252e-05	3.1717e-06	0	0	0	Archaea; Euryarchaeota; Thermococci; Thermococcales; Thermococcaceae; Thermococcus
New,CleanUp,ReferenceOTU787077	0	0	0	0	0	4.13758e-06	0	3.33321e-05	7.09916e-06	5.3919e-05	0	0	0	Archaea; Nanoarchaeota; Nanoarchaeota Incertae Sedis; Unknown Order; Unknown Family; Nanoarchaeum; uncultured nanoarchaeote
New,CleanUp,ReferenceOTU1758242	0	0	0	0	0	0	0	0	0	9.83228e-05	0	0	0	Archaea; Crenarchaeota; Thermoprotei; Fervidicoccales; Fervidicoccaceae
New,CleanUp,ReferenceOTU324043	0	0	0	0	0	0	0	0	0	9.83228e-05	0	0	0	Archaea; Crenarchaeota; Thermoprotei; Fervidicoccales; Fervidicoccaceae
New,CleanUp,ReferenceOTU653529	0	0	0	0	0	0	0	0	0	9.83228e-05	0	0	0	Unassigned
New,CleanUp,ReferenceOTU1186893	0	0	0	0	0	8.99924e-05	1.06351e-06	7.1426e-06	0	0	0	0	0	Unassigned
New,CleanUp,ReferenceOTU737333	0	0	0	0	0	0	0	9.76156e-05	0	0	0	0	0	Unassigned
New,CleanUp,ReferenceOTU576091	0	0	0	0	0	9.51644e-05	0	2.38087e-06	0	0	0	0	0	Unassigned
FR852906,1,943	0	0	0	0	0	3.10319e-06	0	0	2.36639e-06	9.19794e-05	0	0	0	Archaea; Crenarchaeota; Thermoprotei; Desulfurococcales
New,ReferenceOTU796	0	0	0	0	0	7.24077e-06	1.06351e-06	8.80921e-05	0	0	0	0	0	Archaea; Woesearchaeota (DHVEG-6); uncultured archaeon; uncultured archaeon; uncultured archaeon; uncultured archaeon; uncultured archaeon
New,CleanUp,ReferenceOTU1055389	0	0	0	0	0	0	1.06351e-06	0	0	9.51511e-05	0	0	0	Archaea; Euryarchaeota; Methanococci; Methanococcales; Methanocaldococcaceae; Methanocaldococcus; Ambiguous_taxa
New,CleanUp,ReferenceOTU1049801	0	0	0	0	0	0	0	0	2.36639e-06	9.19794e-05	0	0	0	Archaea; Nanoarchaeota; Nanoarchaeota Incertae Sedis; Unknown Order; Unknown Family; Nanoarchaeum; uncultured nanoarchaeote
New,CleanUp,ReferenceOTU701786	0	0	0	0	0	1.0344e-06	0	9.28538e-05	0	0	0	0	0	Unassigned
New,CleanUp,ReferenceOTU1552847	0	0	0	0	0	1.0344e-06	0	0	0	9.19794e-05	0	0	0	Archaea; Crenarchaeota; Thermoprotei; Fervidicoccales; Fervidicoccaceae
New,CleanUp,ReferenceOTU659382	0	0	0	0	0	0	4.25403e-06	8.80921e-05	0	0	0	0	0	Bacteria; Proteobacteria; Epsilonproteobacteria; Campylobacterales; Helicobacteraceae; Sulfurimonas; uncultured bacterium
New,CleanUp,ReferenceOTU1511530	0	0	0	0	0	3.62039e-05	3.19052e-06	5.23791e-05	0	0	0	0	0	Archaea; Woesearchaeota (DHVEG-6); uncultured archaeon; uncultured archaeon; uncultured archaeon; uncultured archaeon; uncultured archaeon
New,CleanUp,ReferenceOTU1012080	0	0	0	0	0	0	0	2.38087e-06	6.38925e-05	2.53736e-05	0	0	0	Archaea; Crenarchaeota; Thermoprotei; Desulfurococcales; Desulfurococcaceae; uncultured; uncultured archaeon
New,CleanUp,ReferenceOTU1233183	0	0	0	0	0	0	2.12701e-06	8.80921e-05	0	0	0	0	0	Unassigned
New,CleanUp,ReferenceOTU727703	0	0	0	0	0	0	0	0	8.28236e-05	6.34341e-06	0	0	0	Archaea; Crenarchaeota; Thermoprotei; Desulfurococcales; Desulfurococcaceae; uncultured; uncultured archaeon
New,ReferenceOTU1075	0	0	0	0	0	0	0	0	9.46555e-06	7.92926e-05	0	0	0	Archaea; Crenarchaeota; Thermoprotei; Desulfurococcales; Desulfurococcaceae; uncultured; uncultured archaeon
New,CleanUp,ReferenceOTU1398185	0	0	0	0	0	0	0	8.80921e-05	0	0	0	0	0	Unassigned
New,CleanUp,ReferenceOTU1197027	0	0	0	0	0	7.13733e-05	0	1.66661e-05	0	0	0	0	0	Unassigned
New,ReferenceOTU1995	0	0	0	0	0	0	0	4.52365e-05	4.2595e-05	0	0	0	0	Archaea; Euryarchaeota; Archaeoglobi; Archaeoglobales; Archaeoglobaceae; uncultured
New,CleanUp,ReferenceOTU1434433	0	0	0	0	0	0	2.12701e-06	0	0	8.5636e-05	0	0	0	Unassigned
New,CleanUp,ReferenceOTU78399	0	0	0	0	0	0	0	0	7.80908e-05	9.51511e-06	0	0	0	Archaea; Euryarchaeota; Archaeoglobi; Archaeoglobales; Archaeoglobaceae; uncultured
New,CleanUp,ReferenceOTU1182058	0	0	0	0	0	1.0344e-06	0	1.42852e-05	2.36639e-06	6.97775e-05	0	0	0	Archaea; Nanoarchaeota; Nanoarchaeota Incertae Sedis; Unknown Order; Unknown Family; Nanoarchaeum; uncultured nanoarchaeote
New,CleanUp,ReferenceOTU1590751	0	0	0	0	0	0	3.19052e-05	0	0	5.3919e-05	0	0	0	Unassigned
New,CleanUp,ReferenceOTU63796	0	0	0	0	0	0	0	8.57112e-05	0	0	0	0	0	Unassigned
New,CleanUp,ReferenceOTU294682	0	0	0	0	0	0	0	0	0	8.5636e-05	0	0	0	Unassigned
New,CleanUp,ReferenceOTU683598	0	0	0	0	0	0	0	0	0	8.5636e-05	0	0	0	Unassigned
New,CleanUp,ReferenceOTU1551616	0	0	0	0	0	0	0	0	2.36639e-06	8.24643e-05	0	0	0	Unassigned
New,CleanUp,ReferenceOTU1367377	0	0	0	0	0	0	0	0	2.36639e-06	8.24643e-05	0	0	0	Unassigned
New,CleanUp,ReferenceOTU1135423	0	0	0	0	0	0	1.16986e-05	0	1.89311e-05	5.3919e-05	0	0	0	Unassigned
New,ReferenceOTU3209	0	0	0	0	0	0	0	9.52347e-06	4.73278e-06	6.97775e-05	0	0	0	Archaea; Nanoarchaeota; Nanoarchaeota Incertae Sedis; Unknown Order; Unknown Family; Nanoarchaeum; uncultured nanoarchaeote
New,CleanUp,ReferenceOTU1630848	0	0	0	0	0	0	0	8.33304e-05	0	0	0	0	0	Unassigned
New,CleanUp,ReferenceOTU527581	0	0	0	0	0	0	0	8.33304e-05	0	0	0	0	0	Unassigned
New,CleanUp,ReferenceOTU898864	0	0	0	0	0	0	0	8.33304e-05	0	0	0	0	0	Unassigned
New,CleanUp,ReferenceOTU7594	0	0	0	0	0	2.06879e-06	0	0	8.04572e-05	0	0	0	0	Unassigned
New,CleanUp,ReferenceOTU1178633	0	0	0	0	0	0	0	0	0	8.24643e-05	0	0	0	Unassigned
New,CleanUp,ReferenceOTU1733699	0	0	0	0	0	2.06879e-06	0	7.38069e-05	2.36639e-06	3.1717e-06	0	0	0	Archaea; Euryarchaeota; Thermoplasmata; Thermoplasmatales; Deep Sea Hydrothermal Vent Gp 2(DHVEG-2); Ambiguous_taxa
New,CleanUp,ReferenceOTU1702033	0	0	0	0	0	0	0	8.09495e-05	0	0	0	0	0	Unassigned
New,CleanUp,ReferenceOTU105956	0	0	0	0	0	0	1.06351e-06	0	2.36639e-06	7.61209e-05	0	0	0	Archaea; Nanoarchaeota; Nanoarchaeota Incertae Sedis; Unknown Order; Unknown Family; Nanoarchaeum; uncultured nanoarchaeote
New,CleanUp,ReferenceOTU745444	0	0	0	0	0	0	0	0	0	7.92926e-05	0	0	0	Unassigned
New,CleanUp,ReferenceOTU873089	0	0	0	0	0	0	0	0	0	7.92926e-05	0	0	0	Unassigned
New,ReferenceOTU2915	0	0	0	0	0	0	0	0	0	7.92926e-05	0	0	0	Archaea; Crenarchaeota; Thermoprotei; Desulfurococcales; Desulfurococcaceae; uncultured; uncultured archaeon
New,CleanUp,ReferenceOTU1744353	0	0	0	0	0	0	0	7.85686e-05	0	0	0	0	0	Unassigned
New,CleanUp,ReferenceOTU1405200	0	0	0	0	0	0	0	7.85686e-05	0	0	0	0	0	Unassigned
New,CleanUp,ReferenceOTU310298	0	0	0	0	0	0	0	7.85686e-05	0	0	0	0	0	Unassigned
New,CleanUp,ReferenceOTU978460	0	0	0	0	0	0	0	2.38087e-06	0	7.61209e-05	0	0	0	Unassigned
New,CleanUp,ReferenceOTU1284152	0	0	0	0	0	0	0	0	7.80908e-05	0	0	0	0	Archaea; Crenarchaeota; Thermoprotei; Desulfurococcales; Desulfurococcaceae; uncultured; uncultured archaeon
New,CleanUp,ReferenceOTU691321	0	0	0	0	0	1.0344e-06	0	0	7.09916e-06	6.97775e-05	0	0	0	Archaea; Nanoarchaeota; Nanoarchaeota Incertae Sedis; Unknown Order; Unknown Family; Nanoarchaeum; uncultured nanoarchaeote
New,CleanUp,ReferenceOTU861586	0	0	0	0	0	0	6.80645e-05	0	0	9.51511e-06	0	0	0	Unassigned
New,CleanUp,ReferenceOTU1115187	0	0	0	0	0	6.20637e-06	0	0	4.73278e-06	6.66058e-05	0	0	0	Archaea; Crenarchaeota; Thermoprotei; Desulfurococcales; Pyrodictiaceae
New,CleanUp,ReferenceOTU1048001	0	0	0	0	0	0	0	0	3.31294e-05	4.44038e-05	0	0	0	Archaea; Crenarchaeota; Thermoprotei; Thermoproteales; Thermoproteaceae; uncultured
New,CleanUp,ReferenceOTU1190195	0	0	0	0	0	0	1.06351e-06	0	0	7.61209e-05	0	0	0	Unassigned
New,CleanUp,ReferenceOTU1637552	0	0	0	0	0	0	0	7.61878e-05	0	0	0	0	0	Unassigned
New,CleanUp,ReferenceOTU1256998	0	0	0	0	0	0	0	7.61878e-05	0	0	0	0	0	Unassigned
New,CleanUp,ReferenceOTU1429455	0	0	0	0	0	7.03389e-05	1.06351e-06	4.76173e-06	0	0	0	0	0	Unassigned
New,ReferenceOTU2227	0	0	0	0	0	1.0344e-06	0	3.80939e-05	3.31294e-05	3.1717e-06	0	0	0	Archaea; Euryarchaeota; Archaeoglobi; Archaeoglobales; Archaeoglobaceae; uncultured
New,CleanUp,ReferenceOTU343428	0	0	0	0	0	0	1.06351e-06	0	5.44269e-05	1.90302e-05	0	0	0	Archaea; Crenarchaeota; Thermoprotei; Desulfurococcales; Desulfurococcaceae; uncultured; uncultured archaeon
AJ299169,1,920	0	0	0	0	0	5.4823e-05	0	7.1426e-06	2.36639e-06	9.51511e-06	0	0	0	Archaea; Euryarchaeota; Thermococci; Thermococcales; Thermococcaceae; Palaeococcus; Ambiguous_taxa
New,CleanUp,ReferenceOTU1233313	0	0	0	0	0	0	0	7.38069e-05	0	0	0	0	0	Unassigned
New,CleanUp,ReferenceOTU1217778	0	0	0	0	0	1.0344e-06	0	0	3.78622e-05	3.48887e-05	0	0	0	Archaea; Crenarchaeota; Thermoprotei; Desulfurococcales; Desulfurococcaceae; uncultured; uncultured archaeon
New,CleanUp,ReferenceOTU981876	0	0	0	0	0	2.06879e-06	0	1.42852e-05	5.67933e-05	0	0	0	0	Archaea; Euryarchaeota; Thermococci; Thermococcales; Thermococcaceae; Thermococcus
New,CleanUp,ReferenceOTU671079	0	0	0	0	0	0	0	0	0	7.29492e-05	0	0	0	Unassigned
New,CleanUp,ReferenceOTU942497	0	0	0	0	0	0	0	0	0	7.29492e-05	0	0	0	Archaea; Nanoarchaeota; Nanoarchaeota Incertae Sedis; Unknown Order; Unknown Family; Nanoarchaeum; Nanoarchaeum equitans
New,ReferenceOTU2127	0	0	0	0	0	0	0	0	4.73278e-05	2.53736e-05	0	0	0	Archaea; Crenarchaeota; Thermoprotei; Desulfurococcales; Desulfurococcaceae; uncultured; uncultured archaeon
New,CleanUp,ReferenceOTU1559741	0	0	0	0	0	6.30981e-05	0	9.52347e-06	0	0	0	0	0	Unassigned
New,CleanUp,ReferenceOTU1347231	0	0	0	0	0	1.0344e-06	0	7.1426e-05	0	0	0	0	0	Unassigned
New,CleanUp,ReferenceOTU1394033	0	0	0	0	0	1.0344e-06	0	7.1426e-05	0	0	0	0	0	Unassigned
New,CleanUp,ReferenceOTU1535753	0	0	0	0	0	0	2.12701e-06	0	0	6.97775e-05	0	0	0	Archaea; Euryarchaeota; Methanococci; Methanococcales; Methanocaldococcaceae; Methanocaldococcus; Ambiguous_taxa
New,CleanUp,ReferenceOTU99878	0	1.17409e-05	0	0	0	1.0344e-06	5.63659e-05	2.38087e-06	0	0	0	0	0	Archaea; Thaumarchaeota; Marine Group I
New,CleanUp,ReferenceOTU138131	0	0	0	0	0	0	0	7.1426e-05	0	0	0	0	0	Unassigned
New,CleanUp,ReferenceOTU797187	0	0	0	0	0	0	0	7.1426e-05	0	0	0	0	0	Unassigned
New,CleanUp,ReferenceOTU1704884	0	0	0	0	0	1.0344e-06	0	0	0	6.97775e-05	0	0	0	Archaea; Crenarchaeota; Thermoprotei; Desulfurococcales; Desulfurococcaceae; uncultured; uncultured archaeon
New,CleanUp,ReferenceOTU1681379	0	0	0	0	0	0	0	2.38087e-06	4.2595e-05	2.53736e-05	0	0	0	Archaea; Crenarchaeota; Thermoprotei; Desulfurococcales; Desulfurococcaceae; uncultured; uncultured archaeon
HM186247,1,1335	0	0	0	0	0	0	0	0	0	6.97775e-05	0	0	0	Bacteria; Actinobacteria; Actinobacteria; Propionibacteriales; Nocardioidaceae; Nocardioides; uncultured bacterium
New,CleanUp,ReferenceOTU87539	0	0	0	0	0	0	0	2.38087e-06	4.49614e-05	2.22019e-05	0	0	0	Archaea; Crenarchaeota; Thermoprotei; Desulfurococcales; Desulfurococcaceae; uncultured; uncultured archaeon
New,CleanUp,ReferenceOTU592257	0	0	0	0	0	0	0	6.90452e-05	0	0	0	0	0	Unassigned
New,CleanUp,ReferenceOTU1021034	0	0	0	0	0	0	0	6.90452e-05	0	0	0	0	0	Unassigned
New,CleanUp,ReferenceOTU437913	0	0	0	0	0	0	0	6.90452e-05	0	0	0	0	0	Unassigned
AB235348,1,916	0	0	0	0	0	3.51695e-05	0	2.61895e-05	0	6.34341e-06	0	0	0	Archaea; Euryarchaeota; Thermoplasmata; Thermoplasmatales; Deep Sea Hydrothermal Vent Gp 2(DHVEG-2)
New,CleanUp,ReferenceOTU1520439	0	0	0	0	0	1.44815e-05	0	5.23791e-05	0	0	0	0	0	Unassigned
New,CleanUp,ReferenceOTU635512	0	0	0	0	0	0	0	6.66643e-05	0	0	0	0	0	Unassigned
New,CleanUp,ReferenceOTU353312	0	0	0	0	0	5.06854e-05	6.38104e-06	9.52347e-06	0	0	0	0	0	Unassigned
New,CleanUp,ReferenceOTU927632	0	0	0	0	0	2.37911e-05	0	0	4.73278e-06	3.80604e-05	0	0	0	Archaea; Crenarchaeota; Thermoprotei; Desulfurococcales; Desulfurococcaceae
New,CleanUp,ReferenceOTU1011755	0	0	0	0	0	0	0	4.76173e-05	1.89311e-05	0	0	0	0	Archaea; Euryarchaeota; Archaeoglobi; Archaeoglobales; Archaeoglobaceae; uncultured
New,CleanUp,ReferenceOTU1517144	0	0	0	0	0	0	0	4.76173e-05	1.89311e-05	0	0	0	0	Archaea; Euryarchaeota; Archaeoglobi; Archaeoglobales; Archaeoglobaceae; uncultured
New,CleanUp,ReferenceOTU1558267	0	0	0	0	0	3.10319e-06	0	2.38087e-05	4.73278e-06	3.48887e-05	0	0	0	Archaea; Nanoarchaeota; Nanoarchaeota Incertae Sedis; Unknown Order; Unknown Family; Nanoarchaeum; uncultured nanoarchaeote
New,CleanUp,ReferenceOTU1208200	0	0	0	0	0	0	0	0	4.73278e-05	1.90302e-05	0	0	0	Archaea; Crenarchaeota; Thermoprotei; Desulfurococcales; Desulfurococcaceae; uncultured; uncultured archaeon
New,CleanUp,ReferenceOTU1132457	0	0	9.57747e-07	0	0	0	0	2.85704e-05	3.31294e-05	3.1717e-06	0	0	0	Archaea; Euryarchaeota; Archaeoglobi; Archaeoglobales; Archaeoglobaceae; uncultured
New,CleanUp,ReferenceOTU1792551	0	0	0	0	0	5.27542e-05	0	0	0	1.26868e-05	0	0	0	Archaea; Nanoarchaeota; Nanoarchaeota Incertae Sedis; Unknown Order; Unknown Family; Nanoarchaeum; uncultured nanoarchaeote
New,ReferenceOTU2390	1.40326e-05	5.21816e-06	1.91549e-05	1.13663e-05	0	5.17198e-06	7.44455e-06	0	2.36639e-06	0	0	0	0	Archaea; Thaumarchaeota; Marine Group I; uncultured marine archaeon; uncultured marine archaeon; uncultured marine archaeon; uncultured marine archaeon
New,CleanUp,ReferenceOTU1410106	0	0	0	0	0	5.27542e-05	0	1.19043e-05	0	0	0	0	0	Unassigned
New,CleanUp,ReferenceOTU1132639	0	0	0	0	0	4.13758e-06	0	2.38087e-05	4.73278e-06	3.1717e-05	0	0	0	Archaea; Nanoarchaeota; Nanoarchaeota Incertae Sedis; Unknown Order; Unknown Family; Nanoarchaeum; uncultured nanoarchaeote
New,CleanUp,ReferenceOTU1682031	0	0	0	0	0	0	0	6.42834e-05	0	0	0	0	0	Unassigned
New,CleanUp,ReferenceOTU723519	0	0	0	0	0	0	2.12701e-06	0	6.15261e-05	0	0	0	0	Archaea; Euryarchaeota; Thermococci; Thermococcales; Thermococcaceae; Thermococcus; Ambiguous_taxa
New,CleanUp,ReferenceOTU1160308	0	0	0	0	0	0	0	0	0	6.34341e-05	0	0	0	Archaea; Crenarchaeota; Thermoprotei; Desulfurococcales; Desulfurococcaceae; uncultured; uncultured archaeon
JX507280,1,926	0	0	0	0	0	5.17198e-06	1.06351e-06	1.42852e-05	4.2595e-05	0	0	0	0	Archaea; Euryarchaeota; Thermococci; Thermococcales; Thermococcaceae; Palaeococcus
New,ReferenceOTU2980	0	0	0	0	0	4.65478e-05	2.12701e-06	1.42852e-05	0	0	0	0	0	Unassigned
New,CleanUp,ReferenceOTU593668	0	0	0	0	0	1.75847e-05	0	4.52365e-05	0	0	0	0	0	Unassigned
New,CleanUp,ReferenceOTU211162	0	0	0	0	0	3.41351e-05	0	2.85704e-05	0	0	0	0	0	Unassigned
New,ReferenceOTU1378	9.35509e-06	2.21772e-05	5.74648e-06	1.13663e-05	0	3.10319e-06	8.50806e-06	2.38087e-06	0	0	0	0	0	Archaea; Thaumarchaeota; Marine Group I
New,CleanUp,ReferenceOTU931684	0	0	0	0	0	0	0	6.19026e-05	0	0	0	0	0	Unassigned
New,CleanUp,ReferenceOTU787253	0	0	0	0	0	0	0	6.19026e-05	0	0	0	0	0	Unassigned
New,CleanUp,ReferenceOTU558813	0	0	0	0	0	0	0	6.19026e-05	0	0	0	0	0	Unassigned
New,CleanUp,ReferenceOTU874506	0	0	0	0	0	0	0	1.19043e-05	4.96941e-05	0	0	0	0	Archaea; Euryarchaeota; Thermococci; Thermococcales; Thermococcaceae; Thermococcus
New,CleanUp,ReferenceOTU1561950	0	0	0	0	0	0	0	0	6.15261e-05	0	0	0	0	Archaea; Euryarchaeota; Thermococci; Thermococcales; Thermococcaceae; Thermococcus; uncultured archaeon
New,CleanUp,ReferenceOTU981379	0	0	0	0	0	5.06854e-05	1.06351e-06	0	9.46555e-06	0	0	0	0	Archaea; Nanoarchaeota; Nanoarchaeota Incertae Sedis; Unknown Order; Unknown Family; Nanoarchaeum; uncultured nanoarchaeote
New,CleanUp,ReferenceOTU1306213	0	0	0	0	0	1.0344e-06	0	5.47599e-05	4.73278e-06	0	0	0	0	Unassigned
New,CleanUp,ReferenceOTU385705	0	0	0	0	0	0	0	4.76173e-05	0	1.26868e-05	0	0	0	Unassigned
New,CleanUp,ReferenceOTU822315	0	0	0	0	0	0	0	0	0	6.02624e-05	0	0	0	Unassigned
New,CleanUp,ReferenceOTU525273	0	0	0	0	0	0	0	0	0	6.02624e-05	0	0	0	Unassigned
New,CleanUp,ReferenceOTU489806	0	0	0	0	0	0	0	0	0	6.02624e-05	0	0	0	Unassigned
New,CleanUp,ReferenceOTU1726933	0	0	0	0	0	0	0	0	3.78622e-05	2.22019e-05	0	0	0	Archaea; Crenarchaeota; Thermoprotei; Desulfurococcales; Desulfurococcaceae; uncultured; uncultured archaeon
New,CleanUp,ReferenceOTU96312	0	0	0	0	0	1.0344e-06	0	1.19043e-05	2.36639e-06	4.44038e-05	0	0	0	Archaea; Nanoarchaeota; Nanoarchaeota Incertae Sedis; Unknown Order; Unknown Family; Nanoarchaeum; uncultured nanoarchaeote
New,CleanUp,ReferenceOTU1775680	0	0	0	0	0	0	0	5.95217e-05	0	0	0	0	0	Unassigned
New,CleanUp,ReferenceOTU297381	0	0	0	0	0	0	0	5.95217e-05	0	0	0	0	0	Unassigned
New,CleanUp,ReferenceOTU1362009	0	0	0	0	0	0	0	5.95217e-05	0	0	0	0	0	Unassigned
New,CleanUp,ReferenceOTU1652605	0	0	0	0	0	0	0	5.95217e-05	0	0	0	0	0	Unassigned
New,CleanUp,ReferenceOTU432677	0	0	0	0	0	0	0	5.95217e-05	0	0	0	0	0	Unassigned
New,CleanUp,ReferenceOTU1567904	0	0	0	0	0	0	0	1.66661e-05	4.73278e-06	3.80604e-05	0	0	0	Archaea; Nanoarchaeota; Nanoarchaeota Incertae Sedis; Unknown Order; Unknown Family; Nanoarchaeum; uncultured nanoarchaeote
New,CleanUp,ReferenceOTU1648755	0	0	0	0	0	0	0	2.85704e-05	3.0763e-05	0	0	0	0	Archaea; Euryarchaeota; Archaeoglobi; Archaeoglobales; Archaeoglobaceae; uncultured
New,CleanUp,ReferenceOTU959426	0	0	0	0	0	0	0	1.90469e-05	4.02286e-05	0	0	0	0	Unassigned
AB095118,1,1050	0	0	0	0	0	0	2.12701e-06	0	0	5.70907e-05	0	0	0	Archaea; Euryarchaeota; Methanococci; Methanococcales; Methanocaldococcaceae; Methanocaldococcus; Ambiguous_taxa
New,CleanUp,ReferenceOTU1445025	0	0	0	0	0	2.06879e-06	0	0	0	5.70907e-05	0	0	0	Archaea; Crenarchaeota; Thermoprotei; Thermoproteales; Thermofilaceae; Thermofilum; uncultured Thermoproteales archaeon
New,CleanUp,ReferenceOTU291102	0	5.21816e-06	0	0	0	0	0	0	0	5.3919e-05	0	0	0	Unassigned
New,CleanUp,ReferenceOTU1695404	0	0	0	0	0	5.17198e-05	2.12701e-06	4.76173e-06	0	0	0	0	0	Unassigned
New,CleanUp,ReferenceOTU295948	0	0	0	0	0	8.27517e-06	0	4.76173e-05	2.36639e-06	0	0	0	0	Unassigned
New,CleanUp,ReferenceOTU1172716	0	0	0	0	0	3.62039e-05	0	0	2.36639e-06	1.90302e-05	0	0	0	Archaea; Crenarchaeota; Thermoprotei; Desulfurococcales; Pyrodictiaceae
New,CleanUp,ReferenceOTU1479724	0	0	0	0	0	4.13758e-06	0	9.52347e-06	2.36639e-06	4.12321e-05	0	0	0	Archaea; Nanoarchaeota; Nanoarchaeota Incertae Sedis; Unknown Order; Unknown Family; Nanoarchaeum; uncultured nanoarchaeote
New,CleanUp,ReferenceOTU1345648	0	0	0	0	0	0	0	5.71408e-05	0	0	0	0	0	Unassigned
New,CleanUp,ReferenceOTU1835021	0	0	0	0	0	0	6.38104e-06	0	0	5.07473e-05	0	0	0	Archaea; Euryarchaeota; Thermoplasmata; Thermoplasmatales; Deep Sea Hydrothermal Vent Gp 2(DHVEG-2); uncultured archaeon; uncultured archaeon
New,CleanUp,ReferenceOTU806767	0	0	0	0	0	0	0	0	3.78622e-05	1.90302e-05	0	0	0	Archaea; Crenarchaeota; Thermoprotei; Desulfurococcales; Desulfurococcaceae; uncultured; uncultured archaeon
New,CleanUp,ReferenceOTU1456190	0	0	0	0	0	0	0	0	3.78622e-05	1.90302e-05	0	0	0	Archaea; Crenarchaeota; Thermoprotei; Desulfurococcales; Desulfurococcaceae; uncultured; uncultured archaeon
New,CleanUp,ReferenceOTU1087301	0	0	0	0	0	0	0	0	5.67933e-05	0	0	0	0	Unassigned
New,CleanUp,ReferenceOTU349382	0	0	0	0	0	0	3.08417e-05	0	0	2.53736e-05	0	0	0	Unassigned
New,CleanUp,ReferenceOTU908031	0	0	0	0	0	0	0	5.47599e-05	0	0	0	0	0	Unassigned
New,CleanUp,ReferenceOTU736092	0	0	0	0	0	0	0	5.47599e-05	0	0	0	0	0	Unassigned
New,CleanUp,ReferenceOTU1676632	0	0	0	0	0	0	0	5.47599e-05	0	0	0	0	0	Unassigned
New,CleanUp,ReferenceOTU602168	0	0	0	0	0	0	0	5.47599e-05	0	0	0	0	0	Unassigned
New,CleanUp,ReferenceOTU326113	0	0	0	0	0	0	0	3.80939e-05	1.65647e-05	0	0	0	0	Archaea; Euryarchaeota; Archaeoglobi; Archaeoglobales; Archaeoglobaceae; uncultured; uncultured archaeon
New,CleanUp,ReferenceOTU572485	0	0	0	0	0	0	0	3.33321e-05	2.12975e-05	0	0	0	0	Archaea; Euryarchaeota; Archaeoglobi; Archaeoglobales; Archaeoglobaceae; uncultured
[truncated: 15,632 more rows]

## Sheet: Bac OTUs only_inactive chimney
Supplementary Table S2: exclusive bacterial and archaeal OTUs present in the active or inactive chimneys.
[truncated: 45,642 more rows]

## Sheet: Arc OTUs only_inactive chimney
Supplementary Table S2: exclusive bacterial and archaeal OTUs present in the active or inactive chimneys.
[truncated: 35,366 more rows]
