# Supplementary material for: Hydrothermal chimneys host habitat-specific microbial communities: analogues for studying the possible impact of mining seafloor massive sulfide deposits
Source: Sci Rep. 2018 Jul 10;8:10386. doi: 10.1038/s41598-018-28613-5 (PMC6039533; doi:10.1038/s41598-018-28613-5)
Supplement: Supplementary file 4 — Supplementary Table S4: exclusive bacterial and archaeal OTUs present in open ocean versus all chimneys samples. [file 41598_2018_28613_MOESM4_ESM.xlsx]

## Sheet: Bac open ocean vs chimneys
Supplementary Table S4: exclusive bacterial and archaeal OTUs present in open ocean versus all chimneys samples.
	open ocean		plume		sulfide talus	vent fluids		active chimneys			inactive chimneys
#OTU ID	RF4	RF1	F9	F5	S3	F6	F1	S5	S6	S8	S7	S1	S2	S4	taxonomy
EU802280,1,1361	0.00559185	0.0043631	0.000116946	0.00346867	0	0.000146898	8.84351e-05	0	0	0	0	0	0	0	Bacteria; Cyanobacteria; Cyanobacteria; SubsectionI; FamilyI; Prochlorococcus; uncultured bacterium
JQ678333,1,1516	0.00332393	0.0034832	0.00316424	0.00336319	2.16947e-06	6.12077e-05	6.33565e-05	0	0	0	0	0	0	0	Bacteria; Deferribacteres; Deferribacteres; Deferribacterales; SAR406 clade(Marine group A); uncultured bacterium; uncultured bacterium
DQ396048,1,1517	0.00340335	0.00355283	0.00259955	0.00209004	0	6.73285e-05	4.09177e-05	0	0	0	0	0	0	0	Bacteria; Proteobacteria; Deltaproteobacteria; Desulfobacterales; Nitrospinaceae; Nitrospina
AY627372,1,1519	0.00170609	0.00302901	0.00141895	0.00168405	0	3.57045e-05	1.8479e-05	0	0	0	0	0	0	0	Bacteria; Proteobacteria; Gammaproteobacteria; E01-9C-26 marine group
AJ567595,1,1519	0.00171932	0.00209055	0.00141115	0.000751873	0	2.44831e-05	2.37587e-05	0	0	0	0	0	0	0	Bacteria; Gemmatimonadetes; Gemmatimonadetes; BD2-11 terrestrial group; uncultured bacterium; uncultured bacterium; uncultured bacterium
HQ674252,1,1529	0.00204142	0.00125497	0.001625	0.0008917	0	7.24291e-05	1.8479e-05	0	0	0	0	0	0	0	Bacteria; Verrucomicrobia; Arctic97B-4 marine group; uncultured bacterium; uncultured bacterium; uncultured bacterium; uncultured bacterium
HQ674271,1,1518	0.000898638	0.00285176	0.000804146	0.00129523	0	2.04026e-05	1.97989e-05	0	0	0	0	0	0	0	Bacteria; Proteobacteria; Gammaproteobacteria; E01-9C-26 marine group; uncultured bacterium; uncultured bacterium; uncultured bacterium
KF464039,1,1277	0.00575216	2.37383e-05	0	0	0	7.1409e-06	0	0	0	0	0	0	0	0	Bacteria; Proteobacteria; Gammaproteobacteria; Pseudomonadales; Moraxellaceae; Alkanindiges
KF906595,1,1486	5.88306e-06	1.58255e-06	0	3.67964e-06	0	0.00402645	0.00164067	0	0	0	0	0	0	0	Bacteria; Proteobacteria; Alphaproteobacteria; Rhodospirillales; Rhodospirillaceae; Thalassospira
AJ567579,1,1507	0.00099865	0.0017867	0.00166509	0.00106096	0	0.000134657	1.31993e-06	0	0	0	0	0	0	0	Bacteria; Proteobacteria; Gammaproteobacteria; Oceanospirillales; Halomonadaceae; Halomonas
JN018762,1,1343	0.00164137	0.00166326	0.00101465	0.00126334	0	3.57045e-05	1.05594e-05	0	0	0	0	0	0	0	Bacteria; Proteobacteria; Alphaproteobacteria; Rickettsiales; S25-593; uncultured bacterium; uncultured bacterium
New,ReferenceOTU1918	0.00132663	0.00190381	0.00113605	0.0011272	0	4.38655e-05	2.63985e-05	0	0	0	0	0	0	0	Bacteria; Gemmatimonadetes; Gemmatimonadetes; BD2-11 terrestrial group; uncultured bacterium; uncultured bacterium; uncultured bacterium
New,ReferenceOTU1454	0.00159137	0.00152558	0.00110709	0.00105115	0	3.46844e-05	1.18793e-05	0	0	0	0	0	0	0	Bacteria; Chloroflexi; SAR202 clade; uncultured Chloroflexi bacterium; uncultured Chloroflexi bacterium; uncultured Chloroflexi bacterium; uncultured Chloroflexi bacterium
New,ReferenceOTU1120	0.00117808	0.00148127	0.00114273	0.00147308	0	2.95837e-05	1.45192e-05	0	0	0	0	0	0	0	Bacteria; Acidobacteria; Acidobacteria; Subgroup 6; uncultured bacterium; uncultured bacterium; uncultured bacterium
HM798990,1,1422	0.00108101	0.00187849	0.000819739	0.00139826	0	3.57045e-05	2.24387e-05	0	0	0	0	0	0	0	Bacteria; Proteobacteria; Alphaproteobacteria; Rhodospirillales; Rhodospirillaceae; AEGEAN-169 marine group; uncultured bacterium
AF505744,1,1391	0.00103689	0.0024039	0.000981236	0.00065007	1.08473e-06	7.957e-05	5.27971e-06	0	0	0	0	0	0	0	Bacteria; Proteobacteria; Gammaproteobacteria; Oceanospirillales; Halomonadaceae; Halomonas; uncultured bacterium
DQ009451,1,2093	0.000986884	0.00206523	0.000807487	0.00121796	0	2.85636e-05	9.23948e-06	0	0	0	0	0	0	0	Bacteria; Proteobacteria; Gammaproteobacteria; E01-9C-26 marine group; uncultured bacterium; uncultured bacterium; uncultured bacterium
HQ672968,1,1501	0.00160902	0.001361	0.000834218	0.00117381	0	3.46844e-05	6.59963e-06	0	0	0	0	0	0	0	Bacteria; Proteobacteria; Gammaproteobacteria; Oceanospirillales; JL-ETNP-Y6
DQ300546,1,1231	0.00184875	0.000495339	0.00180209	0.000228138	0	5.91674e-05	3.69579e-05	0	0	0	0	0	0	0	Archaea; Euryarchaeota; Thermoplasmata; Thermoplasmatales; Marine Group II; uncultured marine group II euryarchaeote; uncultured marine group II euryarchaeote
FJ746117,1,1384	0.00122956	0.00143538	0.000904386	0.000783763	0	2.65233e-05	2.50786e-05	0	0	0	0	0	0	0	Bacteria; Chloroflexi; SAR202 clade
HQ672845,1,1517	0.0012325	0.0013974	0.000870972	0.000813201	0	2.85636e-05	1.05594e-05	0	0	0	0	0	0	0	Bacteria; Proteobacteria; Gammaproteobacteria; E01-9C-26 marine group; uncultured bacterium; uncultured bacterium; uncultured bacterium
JX879045,1,1449	0.000898638	0.00151925	0.000667152	0.00104992	0	1.42818e-05	1.18793e-05	0	0	0	0	0	0	0	Bacteria; Proteobacteria; Alphaproteobacteria; Rhodospirillales; Rhodospirillaceae; AEGEAN-169 marine group; uncultured bacterium
AF143820,1,1306	0	1.58255e-06	0	1.22655e-06	0	0.00308691	0.0010071	0	0	0	0	0	0	0	Bacteria; Proteobacteria; Alphaproteobacteria; Rhodospirillales; Rhodospirillaceae; Thalassospira
ABEF01044008,1065,2439	0.00113984	0.00116792	0.000741774	0.000842638	0	3.26441e-05	3.82779e-05	0	0	0	0	0	0	0	Bacteria; Proteobacteria; Alphaproteobacteria; SAR11 clade; Deep 1; uncultured bacterium; uncultured bacterium
AB189345,1,1469	0.00105307	0.00142905	0.000839787	0.000512697	0	1.63221e-05	9.23948e-06	0	0	0	0	0	0	0	Bacteria; Proteobacteria; Alphaproteobacteria; Rhodospirillales; Rhodospirillaceae; Defluviicoccus
New,ReferenceOTU555	0	1.58255e-06	1.22515e-05	2.45309e-06	9.76261e-06	0.00369286	3.29982e-05	0	0	0	0	0	0	0	Bacteria; Proteobacteria; Epsilonproteobacteria; Campylobacterales; Helicobacteraceae; Sulfurimonas; uncultured bacterium
EU803154,1,1453	0.00109572	0.00122806	3.78684e-05	0.000929723	0	7.54895e-05	1.8479e-05	0	0	0	0	0	0	0	Bacteria; Cyanobacteria; Cyanobacteria; SubsectionI; FamilyI; Prochlorococcus; uncultured bacterium
JX878946,1,1475	0.000553008	0.00134834	0.000475582	0.0009518	0	1.22415e-05	5.27971e-06	0	0	0	0	0	0	0	Bacteria; Proteobacteria; Gammaproteobacteria; Oceanospirillales; SAR86 clade; uncultured bacterium; uncultured bacterium
EU803156,1,1371	0.000995708	0.00102549	0.000659355	0.000642711	0	8.16103e-06	1.05594e-05	0	0	0	0	0	0	0	Bacteria; Proteobacteria; Alphaproteobacteria; SAR11 clade; Deep 1
GQ337220,1,1506	0.000391224	0.00170441	0.000306288	0.000869622	0	1.32617e-05	1.31993e-05	0	0	0	0	0	0	0	Bacteria; Proteobacteria; Gammaproteobacteria; E01-9C-26 marine group; uncultured bacterium; uncultured bacterium; uncultured bacterium
JN833085,1,1377	0.00107219	0.000998592	0.00064599	0.000523736	0	1.83623e-05	1.7159e-05	0	0	0	0	0	0	0	Bacteria; Proteobacteria; Alphaproteobacteria; Rhodospirillales; Rhodospirillaceae; uncultured; uncultured alpha proteobacterium
New,ReferenceOTU1243	1.47077e-06	1.58255e-06	1.11378e-06	0	0	0.000128536	0.00306751	0	0	0	0	0	0	0	Bacteria; Proteobacteria; Gammaproteobacteria; Oceanospirillales; E12-CR02-full
HQ674390,1,1461	0.000997179	0.00104765	0.000585846	0.000506564	0	1.83623e-05	9.23948e-06	0	0	0	0	0	0	0	Bacteria; Proteobacteria; Alphaproteobacteria; Rhodospirillales; Rhodospirillaceae; uncultured; uncultured bacterium
GQ337099,1,1474	0.000448584	0.00154457	0.000374229	0.00074942	0	1.22415e-05	1.05594e-05	0	0	0	0	0	0	0	Bacteria; Proteobacteria; Alphaproteobacteria; Rhodospirillales; Rhodospirillaceae; uncultured; uncultured bacterium
HQ673280,1,1519	0.000510356	0.00157148	0.000396504	0.000635351	0	7.1409e-06	7.91956e-06	0	0	0	0	0	0	0	Bacteria; Planctomycetes; Pla3 lineage; uncultured bacterium; uncultured bacterium; uncultured bacterium; uncultured bacterium
HQ673034,1,1523	0.000664786	0.00114893	0.00058696	0.000571571	0	2.44831e-05	1.31993e-06	0	0	0	0	0	0	0	Bacteria; Gemmatimonadetes; Gemmatimonadetes; BD2-11 terrestrial group
AM997309,1,1457	0.000910404	0.000750131	0.000742888	0.000566665	0	1.93824e-05	3.95978e-06	0	0	0	0	0	0	0	Bacteria; Chloroflexi; SAR202 clade
AB095142,1,1060	0.000507414	0.00156989	0.00036866	0.000505337	0	1.12214e-05	1.18793e-05	0	0	0	0	0	0	0	Archaea; Euryarchaeota; Thermoplasmata; Thermoplasmatales; Marine Group II
AF526984,1,1035	0.000569186	0.00116951	0.000598097	0.000510244	0	2.44831e-05	9.23948e-06	0	0	0	0	0	0	0	Archaea; Thaumarchaeota; Marine Group I; uncultured marine archaeon; uncultured marine archaeon; uncultured marine archaeon; uncultured marine archaeon
HQ674464,1,1436	0.000751561	0.000868822	0.000574708	0.000587516	1.08473e-06	1.02013e-05	2.24387e-05	0	0	0	0	0	0	0	Bacteria; Proteobacteria; Alphaproteobacteria; SAR11 clade; uncultured bacterium; uncultured bacterium; uncultured bacterium
New,ReferenceOTU102	1.17661e-05	1.58255e-06	3.34133e-06	0	0	2.85636e-05	0.00275337	0	0	0	0	0	0	0	Unassigned
HM798821,1,1474	0.000792743	0.000856162	0.000699451	0.000386362	0	1.73422e-05	1.18793e-05	0	0	0	0	0	0	0	Bacteria; Gemmatimonadetes; Gemmatimonadetes; BD2-11 terrestrial group
New,ReferenceOTU663	2.94153e-06	2.69034e-05	7.79643e-06	1.83982e-05	0	0.00265947	2.24387e-05	0	0	0	0	0	0	0	Bacteria; Proteobacteria; Gammaproteobacteria; Pseudomonadales; Moraxellaceae; Acinetobacter; uncultured bacterium
HQ674100,1,1520	0.000370633	0.00113627	0.000207162	0.000738381	0	5.10064e-06	2.63985e-06	0	0	0	0	0	0	0	Bacteria; Deferribacteres; Deferribacteres; Deferribacterales; SAR406 clade(Marine group A); uncultured bacterium; uncultured bacterium
GQ377760,1,1201	0.000285329	1.4243e-05	0.000559115	0.00118239	0	0.000379488	2.37587e-05	0	0	0	0	0	0	0	Bacteria; Proteobacteria; Gammaproteobacteria; Alteromonadales; Alteromonadaceae; Alteromonas
New,ReferenceOTU421	4.4123e-06	0	3.34133e-05	0	0	0.000275435	0.00206832	0	0	0	0	0	0	0	Bacteria; Proteobacteria; Gammaproteobacteria; Alteromonadales; Alteromonadaceae; Marinobacter
HQ673345,1,1528	0.000642725	0.000574467	0.00048672	0.000637804	0	9.18115e-06	1.7159e-05	0	0	0	0	0	0	0	Bacteria; Deferribacteres; Deferribacteres; Deferribacterales; SAR406 clade(Marine group A); uncultured bacterium; uncultured bacterium
JX226879,1,1519	0.000308861	0.00125022	0.000298492	0.000430518	0	2.34629e-05	2.63985e-06	0	0	0	0	0	0	0	Bacteria; Proteobacteria; Deltaproteobacteria; Sh765B-TzT-29
FJ644583,1,1366	0.000436817	0.00143854	0.000147018	0.000220778	0	1.02013e-05	2.37587e-05	0	0	0	0	0	0	0	Bacteria; Bacteroidetes; Flavobacteriia; Flavobacteriales; Flavobacteriaceae; Muricauda
JQ611207,1,1361	0.000869222	0.000830841	3.67546e-05	0.000478353	0	3.06038e-05	2.77185e-05	0	0	0	0	0	0	0	Bacteria; Proteobacteria; Alphaproteobacteria; Rhodospirillales; Rhodospirillaceae; AEGEAN-169 marine group; uncultured bacterium
HQ673484,1,1485	0.000728029	0.00051433	0.000506768	0.000371644	0	2.14227e-05	9.23948e-06	0	0	0	0	0	0	0	Bacteria; Bacteroidetes; Flavobacteriia; Flavobacteriales; NS9 marine group; uncultured bacterium; uncultured bacterium
DQ396361,1,1525	2.94153e-06	0.00117426	0.000120288	1.83982e-05	0	0.000442736	0.000388058	0	0	0	0	0	0	0	Bacteria; Proteobacteria; Alphaproteobacteria; Caulobacterales; Hyphomonadaceae; Henriciella
JQ221621,1,913	0.000744207	0.000493757	0.000667152	0.000213419	0	1.22415e-05	6.59963e-06	0	0	0	0	0	0	0	Archaea; Euryarchaeota; Thermoplasmata; Thermoplasmatales; Marine Group III; uncultured marine archaeon; uncultured marine archaeon
JQ221328,1,915	0.000758915	0.000381395	0.000798577	0.000156998	0	1.73422e-05	1.31993e-06	0	0	0	0	0	0	0	Archaea; Euryarchaeota; Thermoplasmata; Thermoplasmatales; Marine Group III
AY726958,1,1231	0.000350042	0.000897308	0.000322995	0.000517603	1.08473e-06	4.08051e-06	9.23948e-06	0	0	0	0	0	0	0	Bacteria; Proteobacteria; Gammaproteobacteria; E01-9C-26 marine group; uncultured bacterium; uncultured bacterium; uncultured bacterium
HQ674091,1,1456	0.000476528	0.000883065	0.000426576	0.000280879	0	2.14227e-05	1.31993e-05	0	0	0	0	0	0	0	Bacteria; Actinobacteria; Acidimicrobiia; Acidimicrobiales; Sva0996 marine group; uncultured bacterium; uncultured bacterium
HQ674446,1,1499	0.000391224	0.000773869	0.000365318	0.000455049	0	1.22415e-05	1.05594e-05	0	0	0	0	0	0	0	Bacteria; Acidobacteria; Acidobacteria; Subgroup 21; uncultured bacterium; uncultured bacterium; uncultured bacterium
HQ652525,1,1415	0.000367691	0.000982766	0.00020939	0.000430518	0	5.10064e-06	7.91956e-06	0	0	0	0	0	0	0	Bacteria; Acidobacteria; Subgroup 26; uncultured bacterium; uncultured bacterium; uncultured bacterium; uncultured bacterium
JX878991,1,1406	0.000516239	0.000580797	0.000359749	0.000493072	0	2.04026e-06	7.91956e-06	0	0	0	0	0	0	0	Bacteria; Proteobacteria; Alphaproteobacteria; SAR11 clade; Deep 1; uncultured bacterium; uncultured bacterium
New,ReferenceOTU1220	0.000641254	0.000557059	0.000315198	0.000413346	0	8.16103e-06	5.27971e-06	0	0	0	0	0	0	0	Bacteria; Chloroflexi; SAR202 clade
JQ678445,1,1523	0.000516239	0.000542816	0.00048672	0.00037287	0	3.06038e-06	5.27971e-06	0	0	0	0	0	0	0	Bacteria; Proteobacteria; Deltaproteobacteria; Sh765B-TzT-29; uncultured bacterium; uncultured bacterium; uncultured bacterium
ABEF01046320,1,1206	0.000514768	0.000645682	0.000482265	0.000256348	0	8.16103e-06	1.05594e-05	0	0	0	0	0	0	0	Bacteria; Chloroflexi; SAR202 clade
AY704387,1,1461	0.000588306	0.000642517	0.000359749	0.000313996	0	9.18115e-06	0	0	0	0	0	0	0	0	Bacteria; Chloroflexi; SAR202 clade; uncultured Chloroflexi bacterium; uncultured Chloroflexi bacterium; uncultured Chloroflexi bacterium; uncultured Chloroflexi bacterium
HQ673189,1,1515	0.000341218	0.000821345	0.000314085	0.000399854	0	2.44831e-05	7.91956e-06	0	0	0	0	0	0	0	Bacteria; Proteobacteria; Deltaproteobacteria; Desulfurellales; Desulfurellaceae; uncultured; uncultured bacterium
JQ678351,1,1508	0.000375045	0.000495339	0.000387594	0.000620633	0	1.73422e-05	2.63985e-06	0	0	0	0	0	0	0	Bacteria; Acidobacteria; Acidobacteria; Subgroup 6
HQ721407,1,1472	0.000308861	0.000761208	0.000379797	0.000420706	0	8.16103e-06	7.91956e-06	0	0	0	0	0	0	0	Bacteria; Acidobacteria; Acidobacteria; Subgroup 6
New,ReferenceOTU1910	0	4.74766e-06	0	0	0	0	0.00187826	0	0	0	0	0	0	0	Bacteria; Proteobacteria; Epsilonproteobacteria; Campylobacterales; Campylobacteraceae; Arcobacter; uncultured bacterium
JX879020,1,1408	0.00040299	0.000753296	0.000300719	0.000390042	0	1.02013e-05	1.31993e-06	0	0	0	0	0	0	0	Bacteria; Proteobacteria; Alphaproteobacteria; Rhodospirillales; Rhodospirillaceae; AEGEAN-169 marine group; uncultured bacterium
EF572256,1,1435	0.000705967	0.00058238	3.78684e-05	0.000501658	0	8.16103e-06	1.45192e-05	0	0	0	0	0	0	0	Bacteria; Proteobacteria; Alphaproteobacteria; SAR11 clade; uncultured bacterium; uncultured bacterium; uncultured bacterium
GQ377775,1,1249	0.000447113	0.00065676	0.000428804	0.000255122	0	2.14227e-05	9.23948e-06	0	0	0	0	0	0	0	Bacteria; Planctomycetes; Planctomycetacia; Planctomycetales; Planctomycetaceae; Planctomyces; uncultured bacterium
New,ReferenceOTU109	0.000366221	0.000783364	0.00034527	0.000289465	0	2.04026e-06	9.23948e-06	0	0	0	0	0	0	0	Bacteria; Proteobacteria; Deltaproteobacteria; Desulfobacterales; Nitrospinaceae; uncultured; uncultured bacterium
JQ678356,1,1516	0.000216203	0.00094162	0.000226096	0.00037655	0	1.02013e-05	2.63985e-06	0	0	0	0	0	0	0	Bacteria; Proteobacteria; Gammaproteobacteria; Xanthomonadales; uncultured; uncultured bacterium; uncultured bacterium
HQ631954,1,1456	3.38276e-05	5.06417e-05	3.34133e-06	0.00166197	0	1.73422e-05	2.63985e-06	0	0	0	0	0	0	0	Bacteria; Proteobacteria; Gammaproteobacteria; Oceanospirillales; Halomonadaceae; Salinicola
New,ReferenceOTU364	0.000358867	0.000716897	0.000350839	0.000301731	0	1.42818e-05	6.59963e-06	0	0	0	0	0	0	0	Unassigned
JN811705,1,1413	0.000355925	0	3.34133e-05	7.35928e-06	0	0.00047742	0.000839473	0	0	0	0	0	0	0	Bacteria; Proteobacteria; Gammaproteobacteria; Thiotrichales; Piscirickettsiaceae; Methylophaga
New,CleanUp,ReferenceOTU1080266	0.00113837	0.000202567	0.000317426	2.82106e-05	0	6.12077e-06	3.95978e-06	0	0	0	0	0	0	0	Bacteria; Proteobacteria; Gammaproteobacteria; Oceanospirillales; SUP05 cluster
HQ673098,1,1447	0.000414756	0.000572885	0.000290695	0.000370417	0	5.10064e-06	9.23948e-06	0	0	0	0	0	0	0	Bacteria; Proteobacteria; Alphaproteobacteria; SAR11 clade
DQ396281,1,1477	0.000222086	0.000797607	0.000262851	0.000370417	0	4.08051e-06	3.95978e-06	0	0	0	0	0	0	0	Bacteria; Proteobacteria; Alphaproteobacteria; Rhodospirillales; AT-s3-44; uncultured bacterium; uncultured bacterium
New,CleanUp,ReferenceOTU492746	1.47077e-06	0.00163003	4.4551e-06	0	0	1.02013e-06	0	0	0	0	0	0	0	0	Bacteria; Bacteroidetes; Flavobacteriia; Flavobacteriales; Flavobacteriaceae; Sufflavibacter
GQ350571,1,1334	0.000551537	0.000463688	0.000299606	0.000282106	0	2.34629e-05	9.23948e-06	0	0	0	0	0	0	0	Bacteria; Proteobacteria; Alphaproteobacteria; Sneathiellales; Sneathiellaceae; uncultured; uncultured alpha proteobacterium
AY726950,1,1202	0.000530946	0.000530156	0.000392049	0.000153318	0	1.12214e-05	9.23948e-06	0	0	0	0	0	0	0	Bacteria; Proteobacteria; Alphaproteobacteria; Rhodospirillales; Rhodospirillaceae; Defluviicoccus
New,ReferenceOTU2511	0.000419168	0.000561807	0.000334133	0.000296824	0	1.12214e-05	1.31993e-06	0	0	0	0	0	0	0	Bacteria; Proteobacteria; Deltaproteobacteria; Desulfobacterales; Nitrospinaceae; uncultured; uncultured bacterium
JN018840,1,1368	0.000363279	0.000751713	0.000197138	0.000298051	0	1.02013e-06	3.95978e-06	0	0	0	0	0	0	0	Bacteria; Proteobacteria; Deltaproteobacteria; SAR324 clade(Marine group B); uncultured bacterium; uncultured bacterium; uncultured bacterium
JX227497,1,1514	0.000213261	0.000718479	0.000354181	0.000311543	0	8.16103e-06	5.27971e-06	0	0	0	0	0	0	0	Bacteria; Acidobacteria; Acidobacteria; Subgroup 6; uncultured bacterium; uncultured bacterium; uncultured bacterium
HM798938,1,1494	0.000494177	0.000557059	0.000364205	0.000165584	0	1.22415e-05	1.31993e-06	0	0	0	0	0	0	0	Bacteria; Planctomycetes; OM190; uncultured planctomycete; uncultured planctomycete; uncultured planctomycete; uncultured planctomycete
HQ673503,1,1499	0.000283858	0.00080552	0.00015036	0.000329941	0	6.12077e-06	2.63985e-06	0	0	0	0	0	0	0	Bacteria; Proteobacteria; Gammaproteobacteria; Xanthomonadales; uncultured
KC002117,1,1316	0.000620663	0.000533321	1.78204e-05	0.000371644	0	2.34629e-05	9.23948e-06	0	0	0	0	0	0	0	Bacteria; Proteobacteria; Alphaproteobacteria; Rhodospirillales; Rhodospirillaceae; AEGEAN-169 marine group
JN166362,1,1498	0.000285329	0.000704236	0.000223869	0.000347113	0	4.08051e-06	6.59963e-06	0	0	0	0	0	0	0	Bacteria; Proteobacteria; Gammaproteobacteria; KI89A clade; uncultured bacterium; uncultured bacterium; uncultured bacterium
New,CleanUp,ReferenceOTU728779	0.000336805	0.000593458	0.000291809	0.000288239	0	1.42818e-05	0	0	0	0	0	0	0	0	Bacteria; Proteobacteria; Deltaproteobacteria; GR-WP33-30; uncultured bacterium; uncultured bacterium; uncultured bacterium
HQ166819,1,1307	1.47077e-06	1.58255e-06	0	3.67964e-06	0	0.000327461	0.00117077	0	0	0	0	0	0	0	Bacteria; Proteobacteria; Alphaproteobacteria; Sphingomonadales; Erythrobacteraceae
New,ReferenceOTU2247	0.000283858	0.000563389	0.000208276	0.000437877	0	4.08051e-06	5.27971e-06	0	0	0	0	0	0	0	Bacteria; Acidobacteria; Acidobacteria; Subgroup 11; uncultured Acidobacteria bacterium; uncultured Acidobacteria bacterium; uncultured Acidobacteria bacterium
AM997359,1,1455	0.000416227	0.0003719	0.000423235	0.000250216	0	1.22415e-05	3.95978e-06	0	0	0	0	0	0	0	Bacteria; Chloroflexi; SAR202 clade; uncultured deep-sea bacterium; uncultured deep-sea bacterium; uncultured deep-sea bacterium; uncultured deep-sea bacterium
JX001134,1,1514	0.000252972	0.000599788	0.000333019	0.000274747	0	4.08051e-06	0	0	0	0	0	0	0	0	Bacteria; Gemmatimonadetes; Gemmatimonadetes; BD2-11 terrestrial group
New,CleanUp,ReferenceOTU204119	0.000175021	0.000928959	0.000167066	0.000156998	0	7.1409e-06	1.05594e-05	0	0	0	0	0	0	0	Bacteria; Planctomycetes; Planctomycetacia; Planctomycetales; Planctomycetaceae; Rhodopirellula
New,CleanUp,ReferenceOTU696937	0.000376516	0.000414629	0.000354181	0.000283332	0	1.22415e-05	2.63985e-06	0	0	0	0	0	0	0	Bacteria; Chloroflexi; SAR202 clade; uncultured Chloroflexi bacterium; uncultured Chloroflexi bacterium; uncultured Chloroflexi bacterium; uncultured Chloroflexi bacterium
New,CleanUp,ReferenceOTU164097	0.000452996	0	0.000732864	0.000207286	0	3.77447e-05	6.59963e-06	0	0	0	0	0	0	0	Bacteria; Proteobacteria; Gammaproteobacteria; Alteromonadales; Idiomarinaceae; Idiomarina; uncultured bacterium
GU567971,38985,40466	0.000348571	0.000523825	0.000325222	0.00020606	0	1.63221e-05	9.23948e-06	0	0	0	0	0	0	0	Bacteria; Planctomycetes; Planctomycetacia; Planctomycetales; Planctomycetaceae; uncultured
EU650236,1,1368	0.000467703	0.000394056	0.000260623	0.000257575	1.08473e-06	6.12077e-06	1.05594e-05	0	0	0	0	0	0	0	Archaea; Thaumarchaeota; Marine Benthic Group A; uncultured archaeon; uncultured archaeon; uncultured archaeon; uncultured archaeon
New,CleanUp,ReferenceOTU57263	0.000266209	0.00058871	0.000310743	0.000199927	0	2.04026e-06	5.27971e-06	0	0	0	0	0	0	0	Bacteria; Proteobacteria; Deltaproteobacteria; Sh765B-TzT-29; uncultured delta proteobacterium; uncultured delta proteobacterium; uncultured delta proteobacterium
GQ351235,1,1469	0.000213261	0.000671003	0.000262851	0.000207286	0	0	0	0	0	0	0	0	0	0	Bacteria; Planctomycetes; OM190; uncultured bacterium; uncultured bacterium; uncultured bacterium; uncultured bacterium
HQ674084,1,1465	0.000252972	0.000598205	0.000251713	0.000214646	0	2.14227e-05	5.27971e-06	0	0	0	0	0	0	0	Bacteria; Proteobacteria; Alphaproteobacteria; Rhodospirillales; Rhodospirillaceae; uncultured; uncultured bacterium
New,ReferenceOTU54	0.000505943	0.000240548	0.000355294	0.000214646	0	1.32617e-05	5.27971e-06	0	0	0	0	0	0	0	Bacteria; Proteobacteria; Deltaproteobacteria; SAR324 clade(Marine group B); uncultured bacterium; uncultured bacterium; uncultured bacterium
AY704382,1,1437	0.000360338	0.00036557	0.000385366	0.000171717	0	4.08051e-06	7.91956e-06	0	0	0	0	0	0	0	Archaea; Euryarchaeota; Thermoplasmata; Thermoplasmatales; Marine Group III
HQ674085,1,1512	0.000316215	0.000401969	0.000273989	0.000282106	0	2.04026e-06	7.91956e-06	0	0	0	0	0	0	0	Bacteria; Deferribacteres; Deferribacteres; Deferribacterales; SAR406 clade(Marine group A); uncultured bacterium; uncultured bacterium
JN166286,1,1514	0.000273562	0.000590293	0.000162611	0.000250216	0	3.06038e-06	3.95978e-06	0	0	0	0	0	0	0	Bacteria; Acidobacteria; Acidobacteria; Subgroup 6
HQ673742,1,1447	0.000251501	0.000545981	0.000135881	0.000320129	1.08473e-06	1.02013e-05	1.18793e-05	0	0	0	0	0	0	0	Bacteria; Proteobacteria; Alphaproteobacteria; Rhodospirillales; Rhodospirillaceae; AEGEAN-169 marine group
JN018921,1,1369	0.000355925	0.000363987	0.000213845	0.000318902	0	1.83623e-05	2.63985e-06	0	0	0	0	0	0	0	Bacteria; Chloroflexi; SAR202 clade; uncultured Chloroflexi bacterium; uncultured Chloroflexi bacterium; uncultured Chloroflexi bacterium; uncultured Chloroflexi bacterium
HQ672486,1,1447	0.000302978	0.000368735	0.00026842	0.000318902	0	6.12077e-06	5.27971e-06	0	0	0	0	0	0	0	Bacteria; Proteobacteria; Alphaproteobacteria; SAR11 clade; Surface 1
New,ReferenceOTU2148	0	3.16511e-06	5.56888e-06	0	0	5.10064e-05	0.00120641	0	0	0	0	0	0	0	Bacteria; BD1-5; uncultured bacterium; uncultured bacterium; uncultured bacterium; uncultured bacterium; uncultured bacterium
HQ674261,1,1518	0.000142664	0.000610866	0.000160384	0.00034098	0	2.04026e-06	3.95978e-06	0	0	0	0	0	0	0	Bacteria; Proteobacteria; Gammaproteobacteria; E01-9C-26 marine group; uncultured bacterium; uncultured bacterium; uncultured bacterium
HQ673994,1,1476	0.000395636	0.000269034	0.00033636	0.000252669	0	5.10064e-06	1.31993e-06	0	0	0	0	0	0	0	Bacteria; Proteobacteria; Deltaproteobacteria; SAR324 clade(Marine group B); uncultured bacterium; uncultured bacterium; uncultured bacterium
EF597694,1,1449	7.20675e-05	0.000716897	6.79403e-05	0.000390042	0	4.08051e-06	3.95978e-06	0	0	0	0	0	0	0	Bacteria; Acidobacteria; Acidobacteria; Subgroup 6; uncultured bacterium; uncultured bacterium; uncultured bacterium
HQ674501,1,1524	9.70705e-05	0.000688411	8.9102e-05	0.000367964	0	1.02013e-06	9.23948e-06	0	0	0	0	0	0	0	Bacteria; Gemmatimonadetes; Gemmatimonadetes; BD2-11 terrestrial group; uncultured bacterium; uncultured bacterium; uncultured bacterium
HQ673877,1,1507	0.000308861	0.000390891	0.000250599	0.000298051	0	1.02013e-06	1.31993e-06	0	0	0	0	0	0	0	Bacteria; Deferribacteres; Deferribacteres; Deferribacterales; SAR406 clade(Marine group A); uncultured bacterium; uncultured bacterium
DQ300527,1,1290	0.00046182	0.00029752	0.000258396	0.000207286	0	2.04026e-05	3.95978e-06	0	0	0	0	0	0	0	Archaea; Thaumarchaeota; Marine Benthic Group A
New,CleanUp,ReferenceOTU747006	0.00023091	0.000509582	0.000294037	0.00020606	0	0	2.63985e-06	0	0	0	0	0	0	0	Bacteria; Acidobacteria; Acidobacteria; Subgroup 6; uncultured bacterium; uncultured bacterium; uncultured bacterium
HQ674392,1,1465	0.000263267	0.000549146	0.000214959	0.000186435	1.08473e-06	6.12077e-06	5.27971e-06	0	0	0	0	0	0	0	Bacteria; Proteobacteria; SPOTSOCT00m83; uncultured bacterium; uncultured bacterium; uncultured bacterium; uncultured bacterium
HQ674538,1,1512	0.00023091	0.00036557	0.000365318	0.000250216	0	6.12077e-06	0	0	0	0	0	0	0	0	Bacteria; Acidobacteria; Acidobacteria; Subgroup 6; uncultured bacterium; uncultured bacterium; uncultured bacterium
HQ673812,1,1447	0.000204436	0.000362405	0.000294037	0.000325035	0	8.16103e-06	1.18793e-05	0	0	0	0	0	0	0	Bacteria; Proteobacteria; Alphaproteobacteria; OCS116 clade; uncultured bacterium; uncultured bacterium; uncultured bacterium
New,ReferenceOTU1582	0.000223556	0.000400386	0.00028624	0.000268614	0	1.73422e-05	7.91956e-06	0	0	0	0	0	0	0	Bacteria; Acidobacteria; Acidobacteria; Subgroup 6; uncultured bacterium; uncultured bacterium; uncultured bacterium
New,ReferenceOTU1506	0.000297095	0.000413047	0.00022721	0.000257575	0	5.10064e-06	0	0	0	0	0	0	0	0	Bacteria; Proteobacteria; SPOTSOCT00m83; uncultured bacterium; uncultured bacterium; uncultured bacterium; uncultured bacterium
GU941095,1,1324	0.000473587	0.000430455	1.0024e-05	0.000248989	0	2.04026e-05	7.91956e-06	0	0	0	0	0	0	0	Bacteria; Proteobacteria; Alphaproteobacteria; Rhodospirillales; Rhodospirillaceae; AEGEAN-169 marine group
AJ567598,1,1486	0.000233852	0.000482679	0.000214959	0.000240403	0	6.12077e-06	0	0	0	0	0	0	0	0	Bacteria; Acidobacteria; Acidobacteria; Subgroup 5; uncultured bacterium; uncultured bacterium; uncultured bacterium
GU474891,23044,24522	0.00019267	0.000476349	0.000157042	0.000318902	1.08473e-06	9.18115e-06	5.27971e-06	0	0	0	0	0	0	0	Bacteria; Proteobacteria; Gammaproteobacteria; Oceanospirillales; SAR86 clade; uncultured bacterium; uncultured bacterium
New,ReferenceOTU380	0.000308861	0.000384561	0.00028624	0.000150865	0	5.10064e-06	3.95978e-06	0	0	0	0	0	0	0	Bacteria; Acidobacteria; Holophagae; Subgroup 10; NS72; uncultured bacterium; uncultured bacterium
EF573597,1,1440	0.000520651	0.000356075	2.22755e-06	0.000228138	0	5.10064e-06	5.27971e-06	0	0	0	0	0	0	0	Bacteria; Proteobacteria; Alphaproteobacteria; SAR11 clade; uncultured bacterium; uncultured bacterium; uncultured bacterium
JF809773,1,1368	0.000355925	0.000299103	0.000317426	0.000137373	0	0	3.95978e-06	0	0	0	0	0	0	0	Bacteria; Chloroflexi; SAR202 clade; uncultured bacterium; uncultured bacterium; uncultured bacterium; uncultured bacterium
New,ReferenceOTU277	0.000219144	0.000362405	0.0002183	0.000296824	0	2.04026e-06	1.45192e-05	0	0	0	0	0	0	0	Bacteria; Proteobacteria; Alphaproteobacteria; SAR11 clade; Surface 1; uncultured bacterium; uncultured bacterium
FN553501,1,1520	0.000136781	0.000566554	0.00015927	0.000226911	0	2.04026e-06	6.59963e-06	0	0	0	0	0	0	0	Bacteria; Gemmatimonadetes; Gemmatimonadetes; BD2-11 terrestrial group; uncultured bacterium; uncultured bacterium; uncultured bacterium
New,ReferenceOTU2088	0.000327981	0.000395638	0.000230552	0.000115295	0	1.22415e-05	9.23948e-06	0	0	0	0	0	0	0	Bacteria; Planctomycetes; Planctomycetacia; Planctomycetales; Planctomycetaceae; uncultured
GQ375276,1,1509	0.000260326	0.000403551	9.02158e-05	0.000322582	0	9.18115e-06	2.63985e-06	0	0	0	0	0	0	0	Bacteria; Deferribacteres; Deferribacteres; Deferribacterales; SAR406 clade(Marine group A); uncultured Marinimicrobia bacterium; uncultured Marinimicrobia bacterium
New,CleanUp,ReferenceOTU923421	0.000379458	0.000322841	0.000245031	0.000114069	0	1.12214e-05	1.45192e-05	0	0	0	0	0	0	0	Bacteria; Chloroflexi; SAR202 clade; uncultured bacterium; uncultured bacterium; uncultured bacterium; uncultured bacterium
KC294853,1,1460	0.000277975	1.26604e-05	0.000241689	0.000328715	0	0.000185663	3.95978e-05	0	0	0	0	0	0	0	Bacteria; Proteobacteria; Gammaproteobacteria; Alteromonadales; Alteromonadaceae; Alteromonas
New,ReferenceOTU1	0.00100895	1.58255e-06	1.33653e-05	1.59451e-05	0	4.18253e-05	0	0	0	0	0	0	0	0	Bacteria; Proteobacteria; Gammaproteobacteria; Alteromonadales; Idiomarinaceae; Idiomarina; uncultured bacterium
New,CleanUp,ReferenceOTU296822	0.000238264	0.000354492	0.000266192	0.00020238	0	1.12214e-05	3.95978e-06	0	0	0	0	0	0	0	Bacteria; Chloroflexi; S085; uncultured bacterium; uncultured bacterium; uncultured bacterium; uncultured bacterium
New,CleanUp,ReferenceOTU961544	2.94153e-06	1.58255e-06	0	0	0	4.08051e-05	0.00102294	0	0	0	0	0	0	0	Bacteria; Proteobacteria; Gammaproteobacteria; Oceanospirillales; SUP05 cluster
FJ205348,1,1440	0.000300036	0.000278529	0.000257282	0.000215872	0	4.08051e-06	0	0	0	0	0	0	0	0	Bacteria; Chloroflexi; SAR202 clade
FJ666198,1,1231	0	3.16511e-06	6.23714e-05	0	0	0.000979323	1.31993e-06	0	0	0	0	0	0	0	Bacteria; Proteobacteria; Gammaproteobacteria; Alteromonadales; Alteromonadaceae; Spongiibacter
EU686617,30486,32020	0.000101483	0.000577632	0.000145905	0.000210966	0	1.02013e-06	3.95978e-06	0	0	0	0	0	0	0	Bacteria; Acidobacteria; Acidobacteria; Subgroup 6
HM799037,1,1448	0.000466233	0.000188324	0.000221641	0.0001386	0	3.06038e-06	7.91956e-06	0	0	0	0	0	0	0	Bacteria; Chloroflexi; SAR202 clade; uncultured Chloroflexi bacterium; uncultured Chloroflexi bacterium; uncultured Chloroflexi bacterium; uncultured Chloroflexi bacterium
HQ674270,1,1493	0.000270621	0.000356075	0.000194911	0.000186435	0	3.06038e-06	9.23948e-06	0	0	0	0	0	0	0	Bacteria; Proteobacteria; Deltaproteobacteria; SAR324 clade(Marine group B); uncultured bacterium; uncultured bacterium; uncultured bacterium
New,ReferenceOTU1907	0	3.16511e-06	4.4551e-06	0	0	2.65233e-05	0.000984665	0	0	0	0	0	0	0	Bacteria; Proteobacteria; Alphaproteobacteria; DB1-14; uncultured bacterium; uncultured bacterium; uncultured bacterium
JQ678506,1,1414	0.00011619	0.000381395	0.000183773	0.000331168	0	0	5.27971e-06	0	0	0	0	0	0	0	Bacteria; Proteobacteria; Alphaproteobacteria; Rhodospirillales; Rhodospirillaceae; AEGEAN-169 marine group; uncultured bacterium
KF286059,1,1375	0.000336805	0.000245296	0.000216072	0.000210966	0	5.10064e-06	2.63985e-06	0	0	0	0	0	0	0	Bacteria; Chloroflexi; SAR202 clade
New,ReferenceOTU2596	0.000336805	0.000265869	0.00028624	0.000116522	0	5.10064e-06	3.95978e-06	0	0	0	0	0	0	0	Bacteria; Chloroflexi; SAR202 clade
HQ672365,1,1464	0.000136781	0.000500087	9.9126e-05	0.000267387	0	1.02013e-06	3.95978e-06	0	0	0	0	0	0	0	Bacteria; Proteobacteria; Alphaproteobacteria
HQ674189,1,1476	5.58891e-05	0.000671003	5.34612e-05	0.000203607	0	1.02013e-06	2.11188e-05	0	0	0	0	0	0	0	Bacteria; Actinobacteria; Acidimicrobiia; Acidimicrobiales; Sva0996 marine group; uncultured bacterium; uncultured bacterium
JQ678487,1,1474	0.000175021	0.000444698	0.000173749	0.00020238	2.16947e-06	4.08051e-06	3.95978e-06	0	0	0	0	0	0	0	Bacteria; Proteobacteria; Alphaproteobacteria; Sneathiellales; Sneathiellaceae; uncultured
GQ377761,1,1252	0.000257384	2.21558e-05	7.35092e-05	5.27415e-05	0	0.00055801	3.82779e-05	0	0	0	0	0	0	0	Bacteria; Proteobacteria; Gammaproteobacteria; Alteromonadales; Alteromonadaceae; Marinobacter; uncultured Marinobacter sp,
HQ673479,1,1511	0.000113249	0.000610866	4.78923e-05	0.000217099	0	1.02013e-06	1.05594e-05	0	0	0	0	0	0	0	Bacteria; Proteobacteria; Gammaproteobacteria; KI89A clade; uncultured bacterium; uncultured bacterium; uncultured bacterium
HQ674478,1,1448	0.000151489	0.000498504	8.79883e-05	0.000255122	0	3.06038e-06	3.95978e-06	0	0	0	0	0	0	0	Bacteria; Proteobacteria; Alphaproteobacteria; Rhodospirillales; Rhodospirillaceae; AEGEAN-169 marine group; uncultured bacterium
HQ674196,1,1512	6.32429e-05	0.000443115	6.79403e-05	0.000419479	0	0	0	0	0	0	0	0	0	0	Bacteria; Deferribacteres; Deferribacteres; Deferribacterales; SAR406 clade(Marine group A); uncultured bacterium; uncultured bacterium
HQ439543,1,1416	0.000267679	1.58255e-05	0.000130312	0.000446463	1.08473e-06	0.000105073	2.63985e-05	0	0	0	0	0	0	0	Bacteria; Proteobacteria; Gammaproteobacteria; Alteromonadales; Alteromonadaceae; Alteromonas
New,CleanUp,ReferenceOTU757537	0.000185316	0.000376648	0.000297378	0.000111616	0	1.32617e-05	1.31993e-06	0	0	0	0	0	0	0	Bacteria; Planctomycetes; Planctomycetacia; Planctomycetales; Planctomycetaceae; Rhodopirellula; uncultured bacterium
New,ReferenceOTU1490	0.000208849	0.000405134	0.000144791	0.000215872	0	4.08051e-06	2.63985e-06	0	0	0	0	0	0	0	Bacteria; Proteobacteria; Gammaproteobacteria; Oceanospirillales; SAR86 clade; uncultured bacterium; uncultured bacterium
AB694387,1,1427	0.000235322	0.00035291	0.000228324	0.000148412	0	8.16103e-06	3.95978e-06	0	0	0	0	0	0	0	Bacteria; Proteobacteria; Deltaproteobacteria; Desulfobacterales; Nitrospinaceae; uncultured; uncultured bacterium
New,ReferenceOTU2473	0.000308861	0.000348162	0.000270647	4.66088e-05	0	0	0	0	0	0	0	0	0	0	Unassigned
JN018759,1,1343	0.000226498	0.000327589	0.000139222	0.000268614	0	1.02013e-06	7.91956e-06	0	0	0	0	0	0	0	Bacteria; Proteobacteria; Alphaproteobacteria; Rickettsiales; S25-593; uncultured bacterium; uncultured bacterium
New,ReferenceOTU2049	0.00019267	0.000280112	0.000317426	0.000171717	0	3.06038e-06	0	0	0	0	0	0	0	0	Bacteria; Proteobacteria; Deltaproteobacteria; Desulfuromonadales; GR-WP33-58; uncultured bacterium; uncultured bacterium
New,CleanUp,ReferenceOTU1060438	0.000216203	0.0003719	0.000181545	0.000172943	0	6.12077e-06	1.31993e-06	0	0	0	0	0	0	0	Bacteria; Verrucomicrobia; Opitutae
DQ490028,1,1501	0.000229439	0.000292772	0.000213845	0.000199927	0	4.08051e-06	5.27971e-06	0	0	0	0	0	0	0	Bacteria; Verrucomicrobia; Arctic97B-4 marine group; uncultured bacterium; uncultured bacterium; uncultured bacterium; uncultured bacterium
GU220758,1,1494	0.000298565	0.00030385	0.000192683	0.000127561	0	3.06038e-06	5.27971e-06	0	0	0	0	0	0	0	Bacteria; Proteobacteria; Alphaproteobacteria; Rhodospirillales; AT-s3-44; uncultured bacterium; uncultured bacterium
EU686587,16947,18447	0.000314744	0.000292772	0.000178204	0.000123881	0	6.12077e-06	3.95978e-06	0	0	0	0	0	0	0	Bacteria; Lentisphaerae; Oligosphaeria
JQ221919,1,916	0.000201495	0.00029752	0.000233893	0.000163131	0	2.34629e-05	0	0	0	0	0	0	0	0	Archaea; Thaumarchaeota; Marine Group I; uncultured marine archaeon; uncultured marine archaeon; uncultured marine archaeon; uncultured marine archaeon
New,ReferenceOTU1451	1.76492e-05	0.000558642	6.68265e-06	0.000331168	0	0	5.27971e-06	0	0	0	0	0	0	0	Bacteria; Acidobacteria; Acidobacteria; Subgroup 6; uncultured bacterium; uncultured bacterium; uncultured bacterium
New,CleanUp,ReferenceOTU108957	0.000264738	0.000381395	8.9102e-06	0.000235497	0	1.02013e-05	6.59963e-06	0	0	0	0	0	0	0	Bacteria; Proteobacteria; Gammaproteobacteria; Oceanospirillales; SAR86 clade; uncultured bacterium; uncultured bacterium
New,ReferenceOTU1695	0.00026915	0.000283277	0.000153701	0.000183982	0	6.12077e-06	0	0	0	0	0	0	0	0	Bacteria; Chloroflexi; SAR202 clade
New,ReferenceOTU149	0.000232381	0.000314928	0.000220528	0.000115295	0	6.12077e-06	1.31993e-06	0	0	0	0	0	0	0	Bacteria; Chloroflexi; SAR202 clade
New,CleanUp,ReferenceOTU822306	0.00021179	0.000360822	0.000160384	0.0001386	0	1.42818e-05	3.95978e-06	0	0	0	0	0	0	0	Unassigned
HQ674520,1,1521	7.79506e-05	0.000479514	0.000191569	0.000130014	0	1.02013e-06	6.59963e-06	0	0	0	0	0	0	0	Bacteria; Proteobacteria; Deltaproteobacteria; Sh765B-TzT-29; uncultured bacterium; uncultured bacterium; uncultured bacterium
AM747321,1,1243	0.000241206	0.000246878	0.000155929	0.000224458	0	8.16103e-06	5.27971e-06	0	0	0	0	0	0	0	Bacteria; Proteobacteria; Alphaproteobacteria; SAR11 clade; Surface 1; uncultured bacterium; uncultured bacterium
New,ReferenceOTU1664	0.000254442	0.000221558	0.000233893	0.000152092	0	1.53019e-05	0	0	0	0	0	0	0	0	Bacteria; Chloroflexi; SAR202 clade; uncultured bacterium; uncultured bacterium; uncultured bacterium; uncultured bacterium
AY726959,1,1245	0.000270621	0.000234218	0.000212731	0.000149639	0	1.02013e-06	2.63985e-06	0	0	0	0	0	0	0	Bacteria; Proteobacteria; Deltaproteobacteria; Bdellovibrionales; Bdellovibrionaceae; OM27 clade; uncultured delta proteobacterium
AY865607,1,1415	0.000854515	0	0	8.58583e-06	0	3.06038e-06	0	0	0	0	0	0	0	0	Bacteria; Proteobacteria; Betaproteobacteria; Burkholderiales; Burkholderiaceae; Ralstonia; uncultured bacterium
New,ReferenceOTU584	0.000166197	0.000370318	0.000194911	0.000118975	0	6.12077e-06	9.23948e-06	0	0	0	0	0	0	0	Bacteria; Candidate division OD1; uncultured bacterium; uncultured bacterium; uncultured bacterium; uncultured bacterium; uncultured bacterium
EF573754,1,1504	8.82459e-05	2.21558e-05	0.000105809	7.97255e-05	1.08473e-06	0.0003193	0.000248146	0	0	0	0	0	0	0	Bacteria; Proteobacteria; Gammaproteobacteria; Alteromonadales; Alteromonadaceae; Marinobacter
AY726822,1,1202	0.000213261	0.00045261	0.00010915	7.8499e-05	0	9.18115e-06	0	0	0	0	0	0	0	0	Bacteria; Proteobacteria; Gammaproteobacteria; Oceanospirillales; Halomonadaceae; Halomonas; uncultured Halomonas sp,
EF597722,1,1468	0.000179433	0.000344997	0.000199366	0.000130014	0	2.04026e-06	0	0	0	0	0	0	0	0	Bacteria; Acidobacteria; Acidobacteria; Subgroup 6
New,CleanUp,ReferenceOTU761173	0.000295624	0.000261121	0.00017709	0.000111616	0	9.18115e-06	0	0	0	0	0	0	0	0	Bacteria; Gemmatimonadetes; Gemmatimonadetes; PAUC43f marine benthic group
EU800402,1,1485	0.000129427	0.00043362	3.22995e-05	0.000207286	0	1.83623e-05	1.58391e-05	0	0	0	0	0	0	0	Bacteria; Actinobacteria; Acidimicrobiia; Acidimicrobiales; OM1 clade; Candidatus Actinomarina; uncultured bacterium
JQ222041,1,915	0.000282387	0.000257956	0.000120288	0.000163131	0	8.16103e-06	2.63985e-06	0	0	0	0	0	0	0	Archaea; Euryarchaeota; Thermoplasmata; Thermoplasmatales; Marine Group III; uncultured marine archaeon; uncultured marine archaeon
AB694328,1,1550	0.00032651	0.000188324	0.00016818	0.000128787	0	1.02013e-05	1.05594e-05	0	0	0	0	0	0	0	Bacteria; Chloroflexi; SAR202 clade; uncultured bacterium; uncultured bacterium; uncultured bacterium; uncultured bacterium
New,ReferenceOTU543	0.000311802	0.000227888	0.000145905	0.000136147	0	7.1409e-06	1.31993e-06	0	0	0	0	0	0	0	Bacteria; Chloroflexi; SAR202 clade; uncultured bacterium; uncultured bacterium; uncultured bacterium; uncultured bacterium
New,ReferenceOTU928	0.000297095	2.05732e-05	0.000312971	0.000171717	0	2.65233e-05	0	0	0	0	0	0	0	0	Bacteria; Proteobacteria; Gammaproteobacteria; Oceanospirillales; Halomonadaceae; Halomonas
DQ009141,1,1996	0.000291212	0.000340249	1.22515e-05	0.000152092	0	1.73422e-05	2.63985e-06	0	0	0	0	0	0	0	Bacteria; Proteobacteria; Gammaproteobacteria; Oceanospirillales; SAR86 clade
FM992769,1,1393	1.76492e-05	0	0.000793008	0	1.08473e-06	0	0	0	0	0	0	0	0	0	Bacteria; Bacteroidetes; Flavobacteriia; Flavobacteriales; Flavobacteriaceae; Leeuwenhoekiella
New,CleanUp,ReferenceOTU173638	0.000166197	0.000265869	0.000192683	0.000183982	0	0	2.63985e-06	0	0	0	0	0	0	0	Bacteria; Acidobacteria; Acidobacteria; Subgroup 21; uncultured bacterium; uncultured bacterium; uncultured bacterium
New,ReferenceOTU2598	0.000100012	0.000473184	0.000145905	8.58583e-05	0	3.06038e-06	1.31993e-06	0	0	0	0	0	0	0	Bacteria; Planctomycetes; Planctomycetacia; Planctomycetales; Planctomycetaceae; Rhodopirellula
JN018920,1,1411	0.000117661	0.000344997	0.000115833	0.000223232	0	7.1409e-06	0	0	0	0	0	0	0	0	Bacteria; Proteobacteria; Gammaproteobacteria; Oceanospirillales; SAR86 clade; uncultured bacterium; uncultured bacterium
DQ395995,1,1514	0.000254442	0.000261121	0.000155929	0.000121428	0	6.12077e-06	0	0	0	0	0	0	0	0	Bacteria; Verrucomicrobia; Arctic97B-4 marine group
New,ReferenceOTU81	0.000151489	0.000265869	0.000135881	0.000233044	0	6.12077e-06	0	0	0	0	0	0	0	0	Unassigned
New,CleanUp,ReferenceOTU699451	0.000283858	2.8486e-05	0.000421007	3.92495e-05	0	7.1409e-06	0	0	0	0	0	0	0	0	Bacteria; Proteobacteria; Gammaproteobacteria; Oceanospirillales; Halomonadaceae; Halomonas; uncultured bacterium
AM941399,1,1455	7.79506e-05	0	0.000207162	0.00044769	0	4.48856e-05	1.31993e-06	0	0	0	0	0	0	0	Bacteria; Proteobacteria; Gammaproteobacteria; Oceanospirillales; Halomonadaceae; Halomonas
HQ672677,1,1479	0.000210319	0.000204149	0.000148132	0.00020974	0	2.04026e-06	3.95978e-06	0	0	0	0	0	0	0	Bacteria; Proteobacteria; Deltaproteobacteria; SAR324 clade(Marine group B); uncultured bacterium; uncultured bacterium; uncultured bacterium
JN233108,1,1434	0.000158843	0.000335501	0.000101354	0.000176623	1.08473e-06	3.06038e-06	1.31993e-06	0	0	0	0	0	0	0	Bacteria; Chloroflexi; SAR202 clade
New,ReferenceOTU1318	0.00021179	0.000224723	0.00015036	0.000181529	0	6.12077e-06	2.63985e-06	0	0	0	0	0	0	0	Bacteria; Proteobacteria; Alphaproteobacteria; SAR11 clade; Deep 1; uncultured bacterium; uncultured bacterium
HQ674061,1,1437	0.000264738	0.000183576	0.000194911	0.000128787	0	3.06038e-06	1.31993e-06	0	0	0	0	0	0	0	Bacteria; Proteobacteria; Alphaproteobacteria; SAR11 clade; Deep 1
JQ612375,1,1500	0.000263267	8.70405e-05	0.000298492	0.000123881	0	2.04026e-06	1.31993e-06	0	0	0	0	0	0	0	Bacteria; Acidobacteria; Acidobacteria; Subgroup 21; uncultured bacterium; uncultured bacterium; uncultured bacterium
New,CleanUp,ReferenceOTU12229	0.00028827	0.000104449	0.000267306	0.000100577	0	7.1409e-06	0	0	0	0	0	0	0	0	Bacteria; Chloroflexi; SAR202 clade; uncultured bacterium; uncultured bacterium; uncultured bacterium; uncultured bacterium
New,CleanUp,ReferenceOTU1146000	0.000195612	0.000257956	0.000211617	8.95379e-05	0	4.08051e-06	1.31993e-06	0	0	0	0	0	0	0	Bacteria; Planctomycetes; Phycisphaerae; Phycisphaerales; Phycisphaeraceae; Phycisphaera; uncultured organism
HQ673135,1,1486	0.000145606	0.000215227	0.000226096	0.000158225	0	4.08051e-06	7.91956e-06	0	0	0	0	0	0	0	Bacteria; Bacteroidetes; Flavobacteriia; Flavobacteriales; Cryomorphaceae; Fluviicola; uncultured bacterium
GQ337198,1,1474	0.000217673	0.00028486	6.68265e-05	0.000185209	0	2.04026e-06	0	0	0	0	0	0	0	0	Bacteria; Chloroflexi; SAR202 clade
New,CleanUp,ReferenceOTU290136	0.000194141	0.000289607	0.000152587	0.000100577	0	9.18115e-06	2.63985e-06	0	0	0	0	0	0	0	Bacteria; Planctomycetes; Phycisphaerae; Phycisphaerales; Phycisphaeraceae; Phycisphaera; uncultured bacterium
AB189343,1,1405	2.20615e-05	2.53209e-05	7.79643e-06	2.33044e-05	0	0.000632479	3.5638e-05	0	0	0	0	0	0	0	Bacteria; Proteobacteria; Gammaproteobacteria; Alteromonadales; Moritellaceae; Moritella; uncultured Moritella sp,
EU491861,1,1481	0.00011619	0.000348162	0.000114719	0.000156998	0	5.10064e-06	1.31993e-06	0	0	0	0	0	0	0	Bacteria; Gemmatimonadetes; Gemmatimonadetes; BD2-11 terrestrial group; uncultured bacterium; uncultured bacterium; uncultured bacterium
EU803068,1,1454	0.000254442	0.000273782	4.12097e-05	0.000159451	0	7.1409e-06	1.31993e-06	0	0	0	0	0	0	0	Bacteria; Proteobacteria; Alphaproteobacteria; Rickettsiales; SAR116 clade
New,ReferenceOTU1900	0.000320627	0	0.000111378	4.53822e-05	0	0.00016016	9.89945e-05	0	0	0	0	0	0	0	Bacteria; Proteobacteria; Gammaproteobacteria; Alteromonadales; Alteromonadaceae; Alteromonas; uncultured bacterium
AJ391201,1,1441	0.000142664	0.000466853	4.56648e-05	6.99132e-05	0	5.10064e-06	5.27971e-06	0	0	0	0	0	0	0	Bacteria; Bacteroidetes; Flavobacteriia; Flavobacteriales; Flavobacteriaceae; Muricauda
GQ348875,1,1357	0.000107366	0.000341832	0.000123629	0.000153318	0	6.12077e-06	1.31993e-06	0	0	0	0	0	0	0	Bacteria; Proteobacteria; Deltaproteobacteria; Bdellovibrionales; Bdellovibrionaceae; OM27 clade; uncultured bacterium
New,CleanUp,ReferenceOTU179931	0.000189729	0.000226305	0.000152587	0.000160678	0	4.08051e-06	0	0	0	0	0	0	0	0	Bacteria; Chloroflexi; SAR202 clade; uncultured bacterium; uncultured bacterium; uncultured bacterium; uncultured bacterium
HQ674375,1,1520	0.000238264	0.000237383	0.000167066	8.21786e-05	0	6.12077e-06	0	0	0	0	0	0	0	0	Bacteria; Proteobacteria; Deltaproteobacteria; Sh765B-TzT-29; uncultured bacterium; uncultured bacterium; uncultured bacterium
HQ652514,1,1411	0.00013531	0.000322841	6.79403e-05	0.000203607	0	0	0	0	0	0	0	0	0	0	Bacteria; Proteobacteria; Gammaproteobacteria; E01-9C-26 marine group; uncultured bacterium; uncultured bacterium; uncultured bacterium
New,ReferenceOTU2047	0.000161784	0.000237383	0.000106922	0.000212193	0	6.12077e-06	5.27971e-06	0	0	0	0	0	0	0	Bacteria; Proteobacteria; Alphaproteobacteria; Rhodospirillales; Rhodospirillaceae; AEGEAN-169 marine group; uncultured bacterium
New,CleanUp,ReferenceOTU335145	0	4.74766e-06	8.9102e-06	0	1.08473e-06	2.95837e-05	0.000683722	0	0	0	0	0	0	0	Bacteria; Proteobacteria; Gammaproteobacteria; Alteromonadales; Alteromonadaceae; Marinobacter; uncultured bacterium
DQ270698,1,1405	5.14768e-05	0.000115526	0.000357522	2.57575e-05	0	0.000168321	7.91956e-06	0	0	0	0	0	0	0	Bacteria; Proteobacteria; Gammaproteobacteria; Oceanospirillales; Alcanivoracaceae; Alcanivorax
EU268101,1,1448	0.000369162	0.000144012	3.56408e-05	0.000154545	0	1.42818e-05	1.31993e-06	0	0	0	0	0	0	0	Bacteria; Proteobacteria; Alphaproteobacteria; Rickettsiales; SAR116 clade; uncultured marine bacterium; uncultured marine bacterium
New,CleanUp,ReferenceOTU798983	0.000120603	0.000368735	7.01679e-05	0.000155771	0	3.06038e-06	0	0	0	0	0	0	0	0	Bacteria; Planctomycetes; Phycisphaerae; Phycisphaerales; Phycisphaeraceae; Phycisphaera; uncultured bacterium
New,ReferenceOTU2032	0	1.58255e-06	3.34133e-06	0	0	0.000104053	0.000607166	0	0	0	0	0	0	0	Bacteria; BD1-5; uncultured bacterium; uncultured bacterium; uncultured bacterium; uncultured bacterium; uncultured bacterium
HQ673260,1,1524	5.73599e-05	0.000436785	9.35571e-05	0.000109163	0	1.22415e-05	3.95978e-06	0	0	0	0	0	0	0	Bacteria; Planctomycetes; Planctomycetacia; Planctomycetales; Planctomycetaceae; Planctomyces; uncultured bacterium
GQ348131,1,1395	0.000201495	0.000161421	0.000213845	0.000127561	0	4.08051e-06	3.95978e-06	0	0	0	0	0	0	0	Bacteria; Deferribacteres; Deferribacteres; Deferribacterales; SAR406 clade(Marine group A)
FJ150822,1,1353	0.000163255	0.000188324	0.000170408	0.000168037	0	1.42818e-05	5.27971e-06	0	0	0	0	0	0	0	Archaea; Thaumarchaeota; Marine Group I; uncultured marine archaeon; uncultured marine archaeon; uncultured marine archaeon; uncultured marine archaeon
New,CleanUp,ReferenceOTU1063794	2.94153e-06	1.58255e-06	1.33653e-05	0	0	5.30467e-05	0.000634885	0	0	0	0	0	0	0	Bacteria; Proteobacteria; Gammaproteobacteria; Alteromonadales; Alteromonadaceae; Marinobacter; uncultured Marinobacter sp,
New,CleanUp,ReferenceOTU867819	0	1.58255e-06	1.11378e-06	0	3.2542e-06	3.26441e-05	0.000666563	0	0	0	0	0	0	0	Bacteria; BD1-5; uncultured bacterium; uncultured bacterium; uncultured bacterium; uncultured bacterium; uncultured bacterium
New,CleanUp,ReferenceOTU890266	9.26582e-05	0.000351327	0.000245031	7.35928e-06	0	8.16103e-06	0	0	0	0	0	0	0	0	Bacteria; Proteobacteria; Gammaproteobacteria; Oceanospirillales; Alcanivoracaceae; Alcanivorax
EF572367,1,1451	0.000272092	0.000207315	0.00010024	0.000117749	0	7.1409e-06	0	0	0	0	0	0	0	0	Bacteria; Proteobacteria; Alphaproteobacteria; SAR11 clade; uncultured bacterium; uncultured bacterium; uncultured bacterium
DQ300620,1,1438	0.000261796	0.000166168	0.000154815	0.00010303	0	7.1409e-06	6.59963e-06	0	0	0	0	0	0	0	Bacteria; Proteobacteria; Deltaproteobacteria; SAR324 clade(Marine group B); uncultured bacterium; uncultured bacterium; uncultured bacterium
New,CleanUp,ReferenceOTU192897	0.000200024	0.000257956	0.000174863	5.88743e-05	0	4.08051e-06	2.63985e-06	0	0	0	0	0	0	0	Bacteria; Chloroflexi; TK10; uncultured bacterium; uncultured bacterium; uncultured bacterium; uncultured bacterium
New,ReferenceOTU424	0.000104424	0.000235801	0.000330791	1.71717e-05	0	6.12077e-06	1.31993e-06	0	0	0	0	0	0	0	Bacteria; Proteobacteria; Gammaproteobacteria; Oceanospirillales; Alcanivoracaceae; Alcanivorax
New,ReferenceOTU2551	0.000202966	0.000186741	0.000179318	0.000112842	0	6.12077e-06	3.95978e-06	0	0	0	0	0	0	0	Bacteria; Planctomycetes; OM190; uncultured bacterium; uncultured bacterium; uncultured bacterium; uncultured bacterium
New,CleanUp,ReferenceOTU186150	5.73599e-05	0.000428872	4.12097e-05	0.000156998	0	3.06038e-06	3.95978e-06	0	0	0	0	0	0	0	Bacteria; Planctomycetes; Planctomycetacia; Planctomycetales; Planctomycetaceae; Rhodopirellula; uncultured bacterium
EU266007,1,1505	0.000260326	3.48162e-05	0.000102467	0.000101803	7.59314e-06	0.000104053	7.91956e-05	0	0	0	0	0	0	0	Bacteria; Proteobacteria; Gammaproteobacteria; Oceanospirillales; SUP05 cluster
HQ672922,1,1437	0.000161784	0.000273782	7.4623e-05	0.000172943	0	0	2.63985e-06	0	0	0	0	0	0	0	Bacteria; Proteobacteria; Alphaproteobacteria; SAR11 clade; uncultured bacterium; uncultured bacterium; uncultured bacterium
New,CleanUp,ReferenceOTU219963	0.000208849	0.00021681	0.000199366	4.53822e-05	0	4.08051e-06	0	0	0	0	0	0	0	0	Bacteria; Proteobacteria; Gammaproteobacteria; Oceanospirillales; Halomonadaceae; Halomonas
HQ673078,1,1511	6.61845e-05	0.000300685	4.23235e-05	0.000262481	0	1.02013e-06	1.31993e-06	0	0	0	0	0	0	0	Bacteria; Deferribacteres; Deferribacteres; Deferribacterales; SAR406 clade(Marine group A); uncultured bacterium; uncultured bacterium
DQ767689,1,1450	0.000148547	0.000357657	9.57847e-05	6.25539e-05	0	5.10064e-06	0	0	0	0	0	0	0	0	Bacteria; Proteobacteria; Gammaproteobacteria; Oceanospirillales; Halomonadaceae; Halomonas
HQ908699,1,1420	0.00017208	6.48847e-05	0.00031854	6.25539e-05	1.08473e-06	1.63221e-05	2.90384e-05	0	0	0	0	0	0	0	Bacteria; Proteobacteria; Alphaproteobacteria; Sphingomonadales; Erythrobacteraceae; Altererythrobacter
KF859592,1,1498	0.000144135	0.000318093	0.000135881	5.39681e-05	0	1.02013e-05	0	0	0	0	0	0	0	0	Bacteria; Proteobacteria; Gammaproteobacteria; Oceanospirillales; Halomonadaceae; Halomonas
New,CleanUp,ReferenceOTU337612	0.000207378	0.000212062	0.000131426	0.000100577	0	5.10064e-06	2.63985e-06	0	0	0	0	0	0	0	Bacteria; Chloroflexi; SAR202 clade; uncultured Chloroflexi bacterium; uncultured Chloroflexi bacterium; uncultured Chloroflexi bacterium; uncultured Chloroflexi bacterium
New,CleanUp,ReferenceOTU1043022	0.000188258	0.000170916	0.000242803	5.02884e-05	0	3.06038e-06	0	0	0	0	0	0	0	0	Bacteria; Verrucomicrobia; Verrucomicrobiae; Verrucomicrobiales; Verrucomicrobiaceae; Roseibacillus; uncultured bacterium
New,ReferenceOTU2200	0.000144135	0.000218392	0.000102467	0.000182755	0	2.04026e-06	0	0	0	0	0	0	0	0	Bacteria; Chloroflexi; SAR202 clade; uncultured bacterium; uncultured bacterium; uncultured bacterium; uncultured bacterium
GQ337118,1,1471	0.000200024	0.000193072	0.000110264	0.000139826	0	2.04026e-06	2.63985e-06	0	0	0	0	0	0	0	Bacteria; Proteobacteria; Alphaproteobacteria; SAR11 clade; Surface 1
AY664056,1,1253	3.38276e-05	5.22243e-05	1.11378e-06	0.000554399	0	6.12077e-06	0	0	0	0	0	0	0	0	Bacteria; Proteobacteria; Gammaproteobacteria; Oceanospirillales; Halomonadaceae; Salinicola
HQ673439,1,1501	0.000247089	0.000197819	0.000112491	7.23663e-05	0	1.12214e-05	0	0	0	0	0	0	0	0	Bacteria; Bacteroidetes
HM799101,1,1479	0.000155901	0.000193072	0.000197138	8.70848e-05	0	0	0	0	0	0	0	0	0	0	Bacteria; Planctomycetes; OM190; uncultured planctomycete; uncultured planctomycete; uncultured planctomycete; uncultured planctomycete
HQ673041,1,1519	0.000207378	0.000167751	0.000102467	0.000150865	0	2.04026e-06	2.63985e-06	0	0	0	0	0	0	0	Bacteria; Deferribacteres; Deferribacteres; Deferribacterales; SAR406 clade(Marine group A); uncultured bacterium; uncultured bacterium
New,CleanUp,ReferenceOTU669344	0.000176492	0.000218392	8.68745e-05	0.000148412	0	1.02013e-06	1.31993e-06	0	0	0	0	0	0	0	Bacteria; Chloroflexi; SAR202 clade; uncultured bacterium; uncultured bacterium; uncultured bacterium; uncultured bacterium
EU491251,1,1474	0.000220615	0.000170916	0.000129198	9.81238e-05	0	5.10064e-06	2.63985e-06	0	0	0	0	0	0	0	Bacteria; Chloroflexi; SAR202 clade; uncultured Chloroflexi bacterium; uncultured Chloroflexi bacterium; uncultured Chloroflexi bacterium; uncultured Chloroflexi bacterium
New,CleanUp,ReferenceOTU396544	0.000182375	0.000185159	0.000152587	8.34052e-05	0	5.10064e-06	1.58391e-05	0	0	0	0	0	0	0	Bacteria; Chloroflexi; SAR202 clade; uncultured Chloroflexi bacterium; uncultured Chloroflexi bacterium; uncultured Chloroflexi bacterium; uncultured Chloroflexi bacterium
New,ReferenceOTU1931	0	1.58255e-06	2.22755e-06	0	0	9.89524e-05	0.000517411	0	0	0	0	0	0	0	Unassigned
New,CleanUp,ReferenceOTU370836	7.20675e-05	4.74766e-06	3.11857e-05	4.90619e-06	0	1.93824e-05	0.000485733	0	0	0	0	0	0	0	Bacteria; Proteobacteria; Gammaproteobacteria; Alteromonadales; Alteromonadaceae; Marinobacter; uncultured Marinobacter sp,
New,ReferenceOTU1578	0.000392694	1.58255e-06	7.90781e-05	5.88743e-05	0	6.42681e-05	1.8479e-05	0	0	0	0	0	0	0	Bacteria; Proteobacteria; Gammaproteobacteria; Alteromonadales; Alteromonadaceae; Alteromonas; uncultured gamma proteobacterium
GU362996,1,1416	0.000130898	0.000215227	0.000171521	8.09521e-05	0	1.12214e-05	1.31993e-06	0	0	0	0	0	0	0	Bacteria; Planctomycetes; Planctomycetacia; Planctomycetales; Planctomycetaceae; uncultured
New,CleanUp,ReferenceOTU92864	0.000260326	0.000125022	0.000153701	6.25539e-05	0	1.02013e-06	7.91956e-06	0	0	0	0	0	0	0	Bacteria; Proteobacteria; Alphaproteobacteria; Rhodospirillales; Rhodospirillaceae; uncultured
HQ673572,1,1479	0.000220615	0.000189906	0.000149246	3.8023e-05	0	3.06038e-06	5.27971e-06	0	0	0	0	0	0	0	Bacteria; Actinobacteria; Acidimicrobiia; Acidimicrobiales; uncultured; uncultured bacterium; uncultured bacterium
JQ220558,1,915	0.00011472	0.000250044	0.000122515	0.000109163	0	5.10064e-06	3.95978e-06	0	0	0	0	0	0	0	Archaea; Thaumarchaeota; Marine Group I
New,CleanUp,ReferenceOTU1014577	1.47077e-06	0	0	0	0	5.81473e-05	0.00054249	0	0	0	0	0	0	0	Bacteria; Proteobacteria; Epsilonproteobacteria; Campylobacterales; Helicobacteraceae; Sulfurovum; uncultured bacterium
New,ReferenceOTU275	0.000194141	0.000175663	0.000152587	7.72725e-05	0	0	1.31993e-06	0	0	0	0	0	0	0	Bacteria; Chloroflexi; SAR202 clade
New,CleanUp,ReferenceOTU670538	0.000254442	0.000129769	0.000157042	4.29291e-05	0	1.32617e-05	0	0	0	0	0	0	0	0	Bacteria; Proteobacteria; Gammaproteobacteria; KI89A clade
New,ReferenceOTU1478	2.79445e-05	0.000330754	7.79643e-05	0.000149639	0	8.16103e-06	2.63985e-06	0	0	0	0	0	0	0	Bacteria; Spirochaetae; Spirochaetes; Spirochaetales; Spirochaetaceae; Spirochaeta; uncultured organism
EF572164,1,1301	0.000166197	0.000204149	2.11617e-05	0.000198701	0	0	6.59963e-06	0	0	0	0	0	0	0	Bacteria; Proteobacteria; Alphaproteobacteria; SAR11 clade; Surface 1; uncultured bacterium; uncultured bacterium
New,CleanUp,ReferenceOTU987968	0.000105895	7.59626e-05	0.000305174	6.62335e-05	0	3.57045e-05	6.59963e-06	0	0	0	0	0	0	0	Unassigned
JN018845,1,1413	1.02954e-05	0.000473184	2.22755e-05	8.95379e-05	0	0	0	0	0	0	0	0	0	0	Bacteria; Proteobacteria; Deltaproteobacteria; Sh765B-TzT-29; uncultured bacterium; uncultured bacterium; uncultured bacterium
New,CleanUp,ReferenceOTU45929	8.53044e-05	1.26604e-05	0.000461103	1.47186e-05	0	1.42818e-05	6.59963e-06	0	0	0	0	0	0	0	Bacteria; Proteobacteria; Gammaproteobacteria; Alteromonadales; Idiomarinaceae; Idiomarina
New,CleanUp,ReferenceOTU1128272	0.000101483	0.000215227	0.000147018	0.000117749	0	9.18115e-06	3.95978e-06	0	0	0	0	0	0	0	Bacteria; Planctomycetes; Planctomycetacia; Planctomycetales; Planctomycetaceae; Planctomyces; uncultured bacterium
New,CleanUp,ReferenceOTU291668	8.53044e-05	0.000294355	8.24194e-05	0.000125108	0	0	6.59963e-06	0	0	0	0	0	0	0	Bacteria; Gemmatimonadetes; Gemmatimonadetes; BD2-11 terrestrial group; uncultured bacterium; uncultured bacterium; uncultured bacterium
New,ReferenceOTU42	0.000205907	0.000183576	8.9102e-05	9.68972e-05	0	1.02013e-05	3.95978e-06	0	0	0	0	0	0	0	Bacteria; Chloroflexi; SAR202 clade; uncultured bacterium; uncultured bacterium; uncultured bacterium; uncultured bacterium
AB858515,1,1409	0.000177963	0.000175663	0.000133653	0.000101803	0	0	0	0	0	0	0	0	0	0	Bacteria; Deferribacteres; Deferribacteres; Deferribacterales; SAR406 clade(Marine group A)
FJ893796,1,1304	4.4123e-06	4.74766e-06	3.34133e-06	0	0	5.6107e-05	0.000518731	0	0	0	0	0	0	0	Bacteria; Proteobacteria; Alphaproteobacteria; Rhizobiales; Aurantimonadaceae; Aurantimonas
New,ReferenceOTU127	0.000161784	0.000109196	0.00023612	6.99132e-05	0	7.1409e-06	1.31993e-06	0	0	0	0	0	0	0	Bacteria; Acidobacteria; Acidobacteria; Subgroup 3; PAUC26f; uncultured bacterium; uncultured bacterium
GQ351139,1,1519	0.000217673	2.21558e-05	6.4599e-05	0.000117749	2.60336e-05	5.20265e-05	8.44753e-05	0	0	0	0	0	0	0	Bacteria; Proteobacteria; Gammaproteobacteria; Oceanospirillales; SUP05 cluster; uncultured gamma proteobacterium; uncultured gamma proteobacterium
New,CleanUp,ReferenceOTU868395	1.61784e-05	0.000390891	1.55929e-05	0.000149639	0	3.06038e-06	5.27971e-06	0	0	0	0	0	0	0	Bacteria; Acidobacteria; Acidobacteria; Subgroup 11; uncultured Acidobacteria bacterium; uncultured Acidobacteria bacterium; uncultured Acidobacteria bacterium
New,ReferenceOTU2624	0.000198553	0.000213645	9.9126e-05	6.37804e-05	0	5.10064e-06	0	0	0	0	0	0	0	0	Bacteria; Proteobacteria; Gammaproteobacteria; Xanthomonadales; JTB255 marine benthic group
New,CleanUp,ReferenceOTU1018934	0.000100012	0.000238966	8.57607e-05	0.000147186	0	4.08051e-06	2.63985e-06	0	0	0	0	0	0	0	Bacteria; Proteobacteria; Alphaproteobacteria; Rhodospirillales; Rhodospirillaceae; AEGEAN-169 marine group; uncultured bacterium
FJ205235,1,1481	0.000105895	0.000262704	9.24434e-05	0.000104256	0	5.10064e-06	1.31993e-06	0	0	0	0	0	0	0	Bacteria; Acidobacteria; Acidobacteria; Subgroup 13; uncultured bacterium; uncultured bacterium; uncultured bacterium
HM798599,1,1491	0.000167667	0.000126604	0.000184887	8.95379e-05	0	0	2.63985e-06	0	0	0	0	0	0	0	Bacteria; Proteobacteria; Gammaproteobacteria; Oceanospirillales; SAR86 clade
New,ReferenceOTU1517	5.14768e-05	4.90592e-05	0.000374229	6.01008e-05	0	2.65233e-05	3.95978e-06	0	0	0	0	0	0	0	Unassigned
New,ReferenceOTU1519	0.000122074	0.000354492	3.4527e-05	4.0476e-05	0	2.04026e-06	1.05594e-05	0	0	0	0	0	0	0	Bacteria; Bacteroidetes; Flavobacteriia; Flavobacteriales; Flavobacteriaceae; Muricauda
New,ReferenceOTU2566	0.000138252	0.000188324	0.000121402	0.000109163	0	3.06038e-06	0	0	0	0	0	0	0	0	Bacteria; Chloroflexi; SAR202 clade
New,ReferenceOTU1486	0.000107366	0.000254791	7.23954e-05	0.000117749	0	2.04026e-06	2.63985e-06	0	0	0	0	0	0	0	Bacteria; Proteobacteria; Gammaproteobacteria; E01-9C-26 marine group; uncultured bacterium; uncultured bacterium; uncultured bacterium
JN207172,1,1289	5.29476e-05	0.000307015	6.01439e-05	0.000133694	0	1.02013e-06	1.31993e-06	0	0	0	0	0	0	0	Bacteria; Proteobacteria; Gammaproteobacteria; NKB5
AJXC01019507,1,1272	0.000130898	0.000185159	0.000113605	0.000116522	0	3.06038e-06	5.27971e-06	0	0	0	0	0	0	0	Bacteria; Proteobacteria; Alphaproteobacteria; SAR11 clade; Surface 1
New,ReferenceOTU2536	0.000188258	0.000126604	0.000130312	9.44441e-05	0	4.08051e-06	5.27971e-06	0	0	0	0	0	0	0	Bacteria; Chloroflexi; SAR202 clade
KC682731,1,1522	0.00011619	0.000106031	8.79883e-05	0.000224458	0	1.12214e-05	2.63985e-06	0	0	0	0	0	0	0	Bacteria; Proteobacteria; Deltaproteobacteria; Myxococcales; uncultured; uncultured bacterium; uncultured bacterium
HQ672322,1,1517	0.00017355	8.70405e-05	0.000214959	6.25539e-05	0	5.10064e-06	5.27971e-06	0	0	0	0	0	0	0	Bacteria; Planctomycetes; Pla3 lineage; uncultured bacterium; uncultured bacterium; uncultured bacterium; uncultured bacterium
HQ672972,1,1520	2.94153e-05	0.000283277	1.78204e-05	0.000215872	0	0	0	0	0	0	0	0	0	0	Bacteria; Deferribacteres; Deferribacteres; Deferribacterales; SAR406 clade(Marine group A); uncultured bacterium; uncultured bacterium
New,ReferenceOTU1248	0.000142664	0.000167751	0.000170408	5.76477e-05	0	5.10064e-06	1.31993e-06	0	0	0	0	0	0	0	Bacteria; Planctomycetes; Planctomycetacia; Planctomycetales; Planctomycetaceae
New,CleanUp,ReferenceOTU1093302	0.000169138	1.4243e-05	0.00030963	5.1515e-05	0	0	0	0	0	0	0	0	0	0	Bacteria; Proteobacteria; Gammaproteobacteria; Alteromonadales; Idiomarinaceae; Idiomarina; uncultured bacterium
AB518744,1,1387	0	1.58255e-06	1.11378e-06	0	0	0.000230549	0.000310183	0	0	0	0	0	0	0	Bacteria; Proteobacteria; Epsilonproteobacteria
HM591347,1,1497	0.000107366	4.74766e-06	5.34612e-05	0.000284559	0	8.46706e-05	7.91956e-06	0	0	0	0	0	0	0	Bacteria; Proteobacteria; Gammaproteobacteria; Alteromonadales; Alteromonadaceae; Alteromonas
EU802888,1,1445	0.000223556	0.000126604	0.000102467	8.34052e-05	0	0	6.59963e-06	0	0	0	0	0	0	0	Bacteria; Proteobacteria; Alphaproteobacteria; SAR11 clade; Surface 1; uncultured bacterium; uncultured bacterium
New,ReferenceOTU511	0.000107366	0.000193072	6.34852e-05	0.00017417	0	3.06038e-06	0	0	0	0	0	0	0	0	Bacteria; Proteobacteria; Alphaproteobacteria; Rhodospirillales; Rhodospirillaceae; AEGEAN-169 marine group; uncultured bacterium
New,CleanUp,ReferenceOTU1111552	0.000129427	0.000193072	8.13056e-05	0.000131241	0	5.10064e-06	0	0	0	0	0	0	0	0	Bacteria; Proteobacteria; JTB23; uncultured bacterium; uncultured bacterium; uncultured bacterium; uncultured bacterium
HQ673087,1,1481	0.000163255	0.00014876	0.00010024	0.000120202	0	3.06038e-06	2.63985e-06	0	0	0	0	0	0	0	Bacteria; Proteobacteria; Deltaproteobacteria; SAR324 clade(Marine group B); uncultured bacterium; uncultured bacterium; uncultured bacterium
JX530887,1,1456	5.73599e-05	0.000316511	2.89582e-05	0.000131241	0	1.02013e-06	2.63985e-06	0	0	0	0	0	0	0	Bacteria; Acidobacteria; Acidobacteria; Subgroup 6
HQ672455,1,1483	0.00026915	9.33707e-05	9.35571e-05	7.48194e-05	0	4.08051e-06	0	0	0	0	0	0	0	0	Bacteria; Actinobacteria; Acidimicrobiia; Acidimicrobiales; OM1 clade; uncultured bacterium; uncultured bacterium
New,ReferenceOTU2392	0.000127957	0.000175663	0.00012697	0.00010303	0	0	1.31993e-06	0	0	0	0	0	0	0	Unassigned
New,ReferenceOTU1563	0.000205907	0.000137682	0.000114719	7.35928e-05	0	2.04026e-06	0	0	0	0	0	0	0	0	Bacteria; Chloroflexi; SAR202 clade; uncultured marine microorganism; uncultured marine microorganism; uncultured marine microorganism; uncultured marine microorganism
New,CleanUp,ReferenceOTU56306	0.000110307	0.000177246	7.79643e-05	0.000163131	0	1.02013e-06	3.95978e-06	0	0	0	0	0	0	0	Bacteria; Chloroflexi; SAR202 clade; uncultured bacterium; uncultured bacterium; uncultured bacterium; uncultured bacterium
JQ612212,1,1485	0.000102954	0.000212062	8.68745e-05	0.000130014	0	1.02013e-06	0	0	0	0	0	0	0	0	Bacteria; Acidobacteria; Acidobacteria; Subgroup 21; uncultured Acidobacterium sp,; uncultured Acidobacterium sp,; uncultured Acidobacterium sp,
EF573147,1,1490	0.000145606	0.000215227	0	0.000161904	0	4.08051e-06	2.63985e-06	0	0	0	0	0	0	0	Bacteria; Proteobacteria; Gammaproteobacteria; Oceanospirillales; SAR86 clade; uncultured bacterium; uncultured bacterium
New,ReferenceOTU759	0.000142664	0.000188324	0.000106922	8.58583e-05	0	1.02013e-06	0	0	0	0	0	0	0	0	Bacteria; Chloroflexi; Anaerolineae; Anaerolineales; Anaerolineaceae; uncultured; uncultured Chloroflexi bacterium
GU061350,1,1452	0.00015296	0.000232635	1.11378e-05	0.000123881	0	0	0	0	0	0	0	0	0	0	Bacteria; Proteobacteria; Alphaproteobacteria; SAR11 clade; Surface 1; uncultured bacterium; uncultured bacterium
GU940911,1,1404	0.000119132	0.000261121	4.4551e-06	0.000128787	0	5.10064e-06	0	0	0	0	0	0	0	0	Bacteria; Proteobacteria; Gammaproteobacteria; Oceanospirillales; SAR86 clade; uncultured bacterium; uncultured bacterium
New,CleanUp,ReferenceOTU288040	0.00017355	0.000177246	8.46469e-05	7.97255e-05	0	1.02013e-06	0	0	0	0	0	0	0	0	Bacteria; Chloroflexi; SAR202 clade; uncultured bacterium; uncultured bacterium; uncultured bacterium; uncultured bacterium
New,CleanUp,ReferenceOTU1082187	0.000138252	0.00014876	0.000122515	7.97255e-05	0	1.73422e-05	2.63985e-06	0	0	0	0	0	0	0	Archaea; Thaumarchaeota; Marine Group I; uncultured marine group I thaumarchaeote; uncultured marine group I thaumarchaeote; uncultured marine group I thaumarchaeote; uncultured marine group I thaumarchaeote
New,CleanUp,ReferenceOTU775726	0.000176492	0.000163003	6.12577e-05	0.000100577	0	7.1409e-06	0	0	0	0	0	0	0	0	Bacteria; Chloroflexi; SAR202 clade
HQ721399,1,1485	0.000236793	5.85545e-05	0.000140336	6.01008e-05	1.08473e-06	5.10064e-06	3.95978e-06	0	0	0	0	0	0	0	Bacteria; Gemmatimonadetes; Gemmatimonadetes; BD2-11 terrestrial group; uncultured bacterium; uncultured bacterium; uncultured bacterium
New,CleanUp,ReferenceOTU877338	8.53044e-05	0.000177246	0.000112491	0.000128787	0	0	1.31993e-06	0	0	0	0	0	0	0	Bacteria; Chloroflexi; SAR202 clade
HQ674131,1,1447	0.000127957	0.000185159	8.79883e-05	0.000100577	0	2.04026e-06	0	0	0	0	0	0	0	0	Bacteria; Proteobacteria; Alphaproteobacteria; SAR11 clade
HQ674373,1,1519	0.000189729	0.000118692	7.90781e-05	0.00010303	0	5.10064e-06	1.31993e-06	0	0	0	0	0	0	0	Bacteria; Deferribacteres; Deferribacteres; Deferribacterales; SAR406 clade(Marine group A); uncultured bacterium; uncultured bacterium
KC009960,1,1474	1.912e-05	0.00022947	5.56888e-05	0.000192568	0	0	0	0	0	0	0	0	0	0	Bacteria; Planctomycetes; MBMPE71; uncultured planctomycete; uncultured planctomycete; uncultured planctomycete; uncultured planctomycete
AJ567609,1,1486	0.000142664	0.000126604	0.000113605	0.000107936	0	1.02013e-06	3.95978e-06	0	0	0	0	0	0	0	Bacteria; Chloroflexi; SAR202 clade; uncultured Chloroflexi bacterium; uncultured Chloroflexi bacterium; uncultured Chloroflexi bacterium; uncultured Chloroflexi bacterium
JN860418,1,1498	5.58891e-05	0.000269034	5.79163e-05	9.93503e-05	0	1.12214e-05	1.31993e-06	0	0	0	0	0	0	0	Bacteria; Planctomycetes; Planctomycetacia; Planctomycetales; Planctomycetaceae; uncultured; uncultured Planctomycetales bacterium
New,CleanUp,ReferenceOTU443085	0.000117661	0.000183576	0.000112491	7.11397e-05	1.08473e-06	4.08051e-06	3.95978e-06	0	0	0	0	0	0	0	Bacteria; Chloroflexi; SAR202 clade; uncultured bacterium; uncultured bacterium; uncultured bacterium; uncultured bacterium
HM799127,1,1477	0.000166197	0.000147178	0.000120288	4.90619e-05	0	6.12077e-06	3.95978e-06	0	0	0	0	0	0	0	Bacteria; Planctomycetes; OM190; uncultured planctomycete; uncultured planctomycete; uncultured planctomycete; uncultured planctomycete
New,CleanUp,ReferenceOTU512311	0.000238264	6.33022e-05	0.000130312	5.76477e-05	0	2.04026e-06	0	0	0	0	0	0	0	0	Bacteria; Chloroflexi; SAR202 clade; uncultured bacterium; uncultured bacterium; uncultured bacterium; uncultured bacterium
New,CleanUp,ReferenceOTU23689	0.00013384	0.000180411	8.46469e-05	8.34052e-05	0	8.16103e-06	0	0	0	0	0	0	0	0	Bacteria; Gemmatimonadetes; Gemmatimonadetes; BD2-11 terrestrial group
JN018755,1,1414	0.000175021	0.000101283	0.000165953	4.66088e-05	0	1.02013e-06	0	0	0	0	0	0	0	0	Bacteria; Proteobacteria; Deltaproteobacteria; GR-WP33-30; uncultured bacterium; uncultured bacterium; uncultured bacterium
New,ReferenceOTU2210	3.23568e-05	0.000232635	4.00959e-05	0.000183982	0	0	0	0	0	0	0	0	0	0	Bacteria; Deferribacteres; Deferribacteres; Deferribacterales; SAR406 clade(Marine group A); uncultured bacterium; uncultured bacterium
GQ337107,1,1475	0.000100012	0.000204149	8.24194e-05	9.68972e-05	0	1.02013e-06	1.31993e-06	0	0	0	0	0	0	0	Bacteria; Chloroflexi; Anaerolineae; Anaerolineales; Anaerolineaceae; uncultured
New,CleanUp,ReferenceOTU930572	3.97107e-05	0.00022314	0.000115833	9.56707e-05	0	0	9.23948e-06	0	0	0	0	0	0	0	Bacteria; Acidobacteria; Acidobacteria; Subgroup 6; uncultured bacterium; uncultured bacterium; uncultured bacterium
New,CleanUp,ReferenceOTU699525	3.97107e-05	0.00029119	2.33893e-05	0.000128787	0	0	0	0	0	0	0	0	0	0	Bacteria; Planctomycetes; Planctomycetacia; Planctomycetales; Planctomycetaceae; Rhodopirellula; uncultured bacterium
HQ673051,1,1470	0.000189729	8.70405e-05	0.000119174	8.70848e-05	0	0	0	0	0	0	0	0	0	0	Bacteria; Proteobacteria; Deltaproteobacteria; Myxococcales; 0319-6G20; uncultured delta proteobacterium; uncultured delta proteobacterium
JF809732,1,1370	0.000132369	0.00015509	0.00010024	9.32176e-05	0	0	1.31993e-06	0	0	0	0	0	0	0	Bacteria; Chloroflexi; SAR202 clade; uncultured bacterium; uncultured bacterium; uncultured bacterium; uncultured bacterium
New,CleanUp,ReferenceOTU541179	0	1.58255e-06	0	0	0	0.000103033	0.000377499	0	0	0	0	0	0	0	Bacteria; Proteobacteria; Epsilonproteobacteria; Campylobacterales; Campylobacteraceae; Arcobacter
EF573025,1,1502	0.00017355	0.000196237	1.0024e-05	8.83114e-05	0	8.16103e-06	3.95978e-06	0	0	0	0	0	0	0	Bacteria; Bacteroidetes; Flavobacteriia; Flavobacteriales; Flavobacteriaceae; NS4 marine group; uncultured bacterium
New,CleanUp,ReferenceOTU686126	4.70645e-05	0.000246878	2.56168e-05	0.000159451	0	1.02013e-06	0	0	0	0	0	0	0	0	Bacteria; Proteobacteria; Alphaproteobacteria; Rickettsiales; S25-593; uncultured bacterium; uncultured bacterium
New,ReferenceOTU2559	4.85353e-05	0.000319676	5.12337e-05	5.51946e-05	0	0	3.95978e-06	0	0	0	0	0	0	0	Bacteria; Spirochaetae; Spirochaetes; Spirochaetales; Spirochaetaceae; Spirochaeta; uncultured bacterium
JX226838,1,1501	0.000129427	0.000164586	9.35571e-05	8.21786e-05	0	6.12077e-06	2.63985e-06	0	0	0	0	0	0	0	Bacteria; Chloroflexi; SAR202 clade
JF809791,1,1419	6.61845e-05	0.000204149	5.68026e-05	0.000144733	0	4.08051e-06	1.31993e-06	0	0	0	0	0	0	0	Bacteria; Planctomycetes; OM190; uncultured bacterium; uncultured bacterium; uncultured bacterium; uncultured bacterium
New,CleanUp,ReferenceOTU14637	4.4123e-05	0.000281695	9.68985e-05	4.53822e-05	0	6.12077e-06	1.31993e-06	0	0	0	0	0	0	0	Bacteria; Planctomycetes; Planctomycetacia; Planctomycetales; Planctomycetaceae; Planctomyces; uncultured bacterium
New,CleanUp,ReferenceOTU202212	4.55937e-05	0.000237383	4.56648e-05	0.000139826	0	3.06038e-06	2.63985e-06	0	0	0	0	0	0	0	Bacteria; Proteobacteria; Alphaproteobacteria; SAR11 clade; Deep 1; uncultured bacterium; uncultured bacterium
New,ReferenceOTU2292	1.61784e-05	4.74766e-06	0.000289582	4.90619e-06	0	7.75297e-05	7.91956e-05	0	0	0	0	0	0	0	Bacteria; Proteobacteria; Deltaproteobacteria; SAR324 clade(Marine group B); uncultured bacterium; uncultured bacterium; uncultured bacterium
AB694490,1,1426	7.5009e-05	0.000246878	6.79403e-05	7.8499e-05	0	0	0	0	0	0	0	0	0	0	Bacteria; Proteobacteria; Deltaproteobacteria; Sh765B-TzT-29; uncultured bacterium; uncultured bacterium; uncultured bacterium
New,CleanUp,ReferenceOTU520083	0.000179433	1.74081e-05	0.000192683	5.1515e-05	0	2.65233e-05	0	0	0	0	0	0	0	0	Bacteria; Proteobacteria; Gammaproteobacteria; Oceanospirillales; Halomonadaceae; Halomonas; uncultured Halomonas sp,
HQ672309,1,1508	0.000108837	0.000181994	8.13056e-05	8.83114e-05	0	6.12077e-06	0	0	0	0	0	0	0	0	Bacteria; Proteobacteria; Gammaproteobacteria; Salinisphaerales; Salinisphaeraceae; ZD0417 marine group
New,CleanUp,ReferenceOTU856426	0.000164726	0.000128187	9.46709e-05	6.5007e-05	0	8.16103e-06	5.27971e-06	0	0	0	0	0	0	0	Bacteria; Chloroflexi; SAR202 clade
New,ReferenceOTU804	0.00011619	0.000202567	4.67786e-05	9.44441e-05	0	0	5.27971e-06	0	0	0	0	0	0	0	Bacteria; Planctomycetes; Phycisphaerae; Phycisphaerales; Phycisphaeraceae; Phycisphaera; uncultured organism
AM997774,1,1464	0.000130898	0.000134517	0.000147018	4.90619e-05	0	2.04026e-06	1.31993e-06	0	0	0	0	0	0	0	Bacteria; Chloroflexi; SAR202 clade
New,CleanUp,ReferenceOTU142497	0.000111778	0.000109196	0.000157042	8.09521e-05	0	3.06038e-06	2.63985e-06	0	0	0	0	0	0	0	Bacteria; Chloroflexi; SAR202 clade; uncultured bacterium; uncultured bacterium; uncultured bacterium; uncultured bacterium
DQ396126,1,1521	0.000120603	0.000193072	6.79403e-05	7.23663e-05	0	1.02013e-05	0	0	0	0	0	0	0	0	Bacteria; Proteobacteria; Gammaproteobacteria; E01-9C-26 marine group; uncultured gamma proteobacterium; uncultured gamma proteobacterium; uncultured gamma proteobacterium
New,CleanUp,ReferenceOTU730155	0.000186787	0.000109196	0.000122515	4.29291e-05	0	0	0	0	0	0	0	0	0	0	Bacteria; Chloroflexi; SAR202 clade; uncultured bacterium; uncultured bacterium; uncultured bacterium; uncultured bacterium
New,CleanUp,ReferenceOTU220998	0.000127957	9.65358e-05	0.000130312	9.93503e-05	0	4.08051e-06	1.31993e-06	0	0	0	0	0	0	0	Bacteria; Chloroflexi; SAR202 clade; uncultured bacterium; uncultured bacterium; uncultured bacterium; uncultured bacterium
KF859651,1,1493	0.00011472	0.000170916	0.000105809	6.25539e-05	0	3.06038e-06	0	0	0	0	0	0	0	0	Bacteria; Proteobacteria; Gammaproteobacteria; Oceanospirillales; Halomonadaceae; Halomonas
New,ReferenceOTU869	6.03014e-05	0.000181994	0.000111378	6.13273e-05	0	2.44831e-05	1.31993e-05	0	0	0	0	0	0	0	Bacteria; Planctomycetes; Planctomycetacia; Planctomycetales; Planctomycetaceae; Planctomyces
New,CleanUp,ReferenceOTU118009	1.02954e-05	0.000215227	3.34133e-06	0.000218325	1.08473e-06	4.08051e-06	0	0	0	0	0	0	0	0	Bacteria; Proteobacteria; Gammaproteobacteria; Thiotrichales; Francisellaceae; Francisella
JX227024,1,1479	0.000198553	0.000118692	6.4599e-05	6.13273e-05	0	5.10064e-06	2.63985e-06	0	0	0	0	0	0	0	Bacteria; Proteobacteria; Alphaproteobacteria; Rhodospirillales; Rhodospirillaceae; Defluviicoccus
New,CleanUp,ReferenceOTU650198	0.000147077	0.000137682	6.57128e-05	9.44441e-05	0	2.04026e-06	2.63985e-06	0	0	0	0	0	0	0	Bacteria; Proteobacteria; Alphaproteobacteria; Rhizobiales; KF-JG30-B3
EU802996,1,1450	0.000145606	0.000110779	6.34852e-05	0.000126334	0	2.04026e-06	1.31993e-06	0	0	0	0	0	0	0	Bacteria; Proteobacteria; Alphaproteobacteria; SAR11 clade; Surface 1; uncultured bacterium; uncultured bacterium
JQ407269,1,1392	2.94153e-06	1.58255e-06	0	0	0	0.000418253	2.63985e-05	0	0	0	0	0	0	0	Bacteria; Bacteroidetes; Flavobacteriia; Flavobacteriales; Flavobacteriaceae; Muricauda
New,CleanUp,ReferenceOTU619425	0.000202966	7.91277e-05	0.000116946	4.78353e-05	0	0	1.31993e-06	0	0	0	0	0	0	0	Bacteria; Chloroflexi; SAR202 clade
New,CleanUp,ReferenceOTU302039	0.000160313	0.000167751	6.01439e-05	5.64212e-05	0	2.04026e-06	0	0	0	0	0	0	0	0	Bacteria; Chloroflexi; SAR202 clade
JF809737,1,1377	0.000217673	8.07103e-05	8.01918e-05	6.62335e-05	0	1.02013e-06	0	0	0	0	0	0	0	0	Bacteria; Chloroflexi; SAR202 clade; uncultured bacterium; uncultured bacterium; uncultured bacterium; uncultured bacterium
HQ673415,1,1504	0.000164726	0.000112361	0.000114719	5.1515e-05	0	2.04026e-06	0	0	0	0	0	0	0	0	Bacteria; Bacteroidetes; Flavobacteriia; Flavobacteriales; Flavobacteriaceae; NS5 marine group
JX226888,1,1462	0.000164726	0.000104449	0.000108036	5.76477e-05	0	3.06038e-06	6.59963e-06	0	0	0	0	0	0	0	Bacteria; Proteobacteria; Alphaproteobacteria; Rhodospirillales; AT-s3-44; uncultured bacterium; uncultured bacterium
JN166279,1,1485	0.000127957	0.000181994	4.00959e-05	8.34052e-05	0	4.08051e-06	6.59963e-06	0	0	0	0	0	0	0	Bacteria; Chloroflexi; SAR202 clade
New,CleanUp,ReferenceOTU252164	5.0006e-05	0.000242131	8.24194e-05	6.25539e-05	0	0	6.59963e-06	0	0	0	0	0	0	0	Bacteria; Planctomycetes; Planctomycetacia; Planctomycetales; Planctomycetaceae; uncultured
HQ672405,1,1502	0.000120603	7.438e-05	0.000135881	0.00010671	0	3.06038e-06	2.63985e-06	0	0	0	0	0	0	0	Bacteria; Deferribacteres; Deferribacteres; Deferribacterales; SAR406 clade(Marine group A); uncultured bacterium; uncultured bacterium
GQ348413,1,1340	0.000120603	0.000205732	5.79163e-05	5.1515e-05	0	4.08051e-06	2.63985e-06	0	0	0	0	0	0	0	Bacteria; Proteobacteria; Alphaproteobacteria; Rhodospirillales; Rhodospirillaceae; uncultured; uncultured alpha proteobacterium
New,CleanUp,ReferenceOTU181392	0.000147077	0.000140847	0.000104695	4.53822e-05	0	4.08051e-06	0	0	0	0	0	0	0	0	Bacteria; Chloroflexi; SAR202 clade
New,CleanUp,ReferenceOTU650171	0	1.58255e-06	6.68265e-06	0	0	0.000107113	0.000326022	0	0	0	0	0	0	0	Bacteria; Proteobacteria; Epsilonproteobacteria; Campylobacterales; Campylobacteraceae; Campylobacter
JQ196492,1,1349	0.000130898	0.000177246	0	0.000123881	0	3.06038e-06	2.63985e-06	0	0	0	0	0	0	0	Bacteria; Proteobacteria; Gammaproteobacteria; Order Incertae Sedis; Family Incertae Sedis; Marinicella; uncultured bacterium
JQ678450,1,1514	0.000169138	8.54579e-05	0.000158156	2.20778e-05	0	0	2.63985e-06	0	0	0	0	0	0	0	Bacteria; Proteobacteria; Deltaproteobacteria; Desulfuromonadales; GR-WP33-58
HQ673590,1,1504	0.000101483	0.000164586	0.000108036	6.01008e-05	0	1.02013e-06	0	0	0	0	0	0	0	0	Bacteria; Proteobacteria; Deltaproteobacteria; Desulfuromonadales; GR-WP33-58; uncultured bacterium; uncultured bacterium
New,CleanUp,ReferenceOTU1076794	0.00013384	0.000153508	9.68985e-05	4.41557e-05	0	5.10064e-06	1.31993e-06	0	0	0	0	0	0	0	Unassigned
New,CleanUp,ReferenceOTU892853	0.000113249	7.27975e-05	0.000147018	9.32176e-05	0	8.16103e-06	0	0	0	0	0	0	0	0	Unassigned
New,ReferenceOTU616	0.00013384	0.000125022	9.57847e-05	7.8499e-05	0	1.02013e-06	0	0	0	0	0	0	0	0	Bacteria; Chloroflexi; SAR202 clade
New,ReferenceOTU143	0.000122074	0.000150343	0.000135881	2.33044e-05	0	0	1.31993e-06	0	0	0	0	0	0	0	Bacteria; Planctomycetes; Pla3 lineage; uncultured bacterium; uncultured bacterium; uncultured bacterium; uncultured bacterium
JQ860233,1,1442	0.000110307	0.000167751	9.02158e-05	6.25539e-05	0	2.04026e-06	0	0	0	0	0	0	0	0	Bacteria; Proteobacteria; Gammaproteobacteria; Oceanospirillales; Halomonadaceae; Halomonas
New,CleanUp,ReferenceOTU3050	6.9126e-05	0.000191489	6.57128e-05	0.000104256	0	1.02013e-06	0	0	0	0	0	0	0	0	Bacteria; Proteobacteria; Deltaproteobacteria; SAR324 clade(Marine group B); uncultured bacterium; uncultured bacterium; uncultured bacterium
GU474902,18573,20075	0.000123544	0.000137682	0	0.000165584	0	2.04026e-06	1.31993e-06	0	0	0	0	0	0	0	Bacteria; Proteobacteria; Gammaproteobacteria; Alteromonadales; Alteromonadaceae; SAR92 clade; uncultured bacterium
New,CleanUp,ReferenceOTU573986	0	1.58255e-06	0	0	0	6.12077e-06	0.000422376	0	0	0	0	0	0	0	Unassigned
New,ReferenceOTU706	0.000136781	2.21558e-05	0.000207162	2.6984e-05	0	3.26441e-05	2.63985e-06	0	0	0	0	0	0	0	Bacteria; Proteobacteria; Gammaproteobacteria; Oceanospirillales; Halomonadaceae; Halomonas
HQ674058,1,1501	0.000101483	0.000109196	0.000108036	0.000109163	0	0	0	0	0	0	0	0	0	0	Bacteria; Proteobacteria; Gammaproteobacteria; Order Incertae Sedis; Family Incertae Sedis; Marinicella; uncultured bacterium
AY907792,1,1514	9.70705e-05	0.000153508	0	0.000172943	0	4.08051e-06	0	0	0	0	0	0	0	0	Bacteria; Deferribacteres; Deferribacteres; Deferribacterales; SAR406 clade(Marine group A); uncultured bacterium; uncultured bacterium
New,ReferenceOTU890	0.000138252	6.33022e-06	0.000179318	9.56707e-05	0	7.1409e-06	0	0	0	0	0	0	0	0	Bacteria; Proteobacteria; Gammaproteobacteria; Alteromonadales; Alteromonadaceae
New,ReferenceOTU420	7.79506e-05	0.000151925	0.000120288	7.60459e-05	0	0	0	0	0	0	0	0	0	0	Bacteria; Proteobacteria; TA18; uncultured delta proteobacterium; uncultured delta proteobacterium; uncultured delta proteobacterium; uncultured delta proteobacterium
HQ673515,1,1520	5.73599e-05	0.000193072	4.34372e-05	0.000131241	0	1.02013e-06	0	0	0	0	0	0	0	0	Bacteria; Deferribacteres; Deferribacteres; Deferribacterales; SAR406 clade(Marine group A); uncultured bacterium; uncultured bacterium
AY007678,1,1416	0.000425051	0	0	0	0	0	0	0	0	0	0	0	0	0	Bacteria; Proteobacteria; Alphaproteobacteria; Caulobacterales; Hyphomonadaceae; Maricaulis
FR684119,1,1469	0.000179433	0.000102866	4.4551e-06	0.000131241	0	6.12077e-06	0	0	0	0	0	0	0	0	Bacteria; Proteobacteria; Gammaproteobacteria; Oceanospirillales; SAR86 clade
New,CleanUp,ReferenceOTU860671	0.000119132	0.000166168	5.56888e-05	8.09521e-05	0	2.04026e-06	0	0	0	0	0	0	0	0	Bacteria; Planctomycetes; Phycisphaerae; Phycisphaerales; Phycisphaeraceae; Phycisphaera; uncultured organism
New,CleanUp,ReferenceOTU428835	0.000163255	0.000121857	7.68505e-05	5.76477e-05	0	2.04026e-06	1.31993e-06	0	0	0	0	0	0	0	Bacteria; Chloroflexi; SAR202 clade; uncultured bacterium; uncultured bacterium; uncultured bacterium; uncultured bacterium
AY726979,1,1214	0.000144135	8.38754e-05	9.68985e-05	9.07645e-05	0	5.10064e-06	0	0	0	0	0	0	0	0	Bacteria; Verrucomicrobia; Arctic97B-4 marine group; uncultured Verrucomicrobia bacterium; uncultured Verrucomicrobia bacterium; uncultured Verrucomicrobia bacterium; uncultured Verrucomicrobia bacterium
New,CleanUp,ReferenceOTU815786	0.000155901	0.000128187	7.90781e-05	5.1515e-05	0	5.10064e-06	0	0	0	0	0	0	0	0	Bacteria; Chloroflexi; SAR202 clade; uncultured Chloroflexus sp,; uncultured Chloroflexus sp,; uncultured Chloroflexus sp,; uncultured Chloroflexus sp,
KF597122,1,1392	0.000117661	0.000139265	8.9102e-05	7.23663e-05	0	0	1.31993e-06	0	0	0	0	0	0	0	Bacteria; Chloroflexi; SAR202 clade
EU491393,1,1474	0.000144135	0.000131352	6.90541e-05	7.23663e-05	0	1.02013e-06	1.31993e-06	0	0	0	0	0	0	0	Bacteria; Chloroflexi; SAR202 clade; uncultured bacterium; uncultured bacterium; uncultured bacterium; uncultured bacterium
FJ478815,1,1511	0.000145606	0.000131352	0.000104695	3.31168e-05	0	0	3.95978e-06	0	0	0	0	0	0	0	Bacteria; Acidobacteria; Acidobacteria; Subgroup 6; uncultured bacterium; uncultured bacterium; uncultured bacterium
New,ReferenceOTU2105	8.67752e-05	0.000183576	9.02158e-05	5.76477e-05	0	0	0	0	0	0	0	0	0	0	Bacteria; Lentisphaerae; WCHB1-41
KC758958,1,1409	9.26582e-05	6.33022e-06	6.57128e-05	0.000195021	0	5.30467e-05	5.27971e-06	0	0	0	0	0	0	0	Bacteria; Proteobacteria; Gammaproteobacteria; Alteromonadales; Alteromonadaceae; Alteromonas; uncultured gamma proteobacterium
HQ673392,1,1462	1.47077e-05	0.000292772	1.33653e-05	9.56707e-05	0	0	0	0	0	0	0	0	0	0	Bacteria; Proteobacteria; Alphaproteobacteria; Rhodospirillales; Rhodospirillaceae; uncultured
New,CleanUp,ReferenceOTU1105841	8.38336e-05	0.000183576	4.78923e-05	9.07645e-05	0	9.18115e-06	0	0	0	0	0	0	0	0	Bacteria; Planctomycetes; OM190; uncultured bacterium; uncultured bacterium; uncultured bacterium; uncultured bacterium
New,CleanUp,ReferenceOTU1018866	0	0.000300685	1.11378e-05	0.000100577	0	0	0	0	0	0	0	0	0	0	Bacteria; Proteobacteria; Gammaproteobacteria; Oceanospirillales; SAR86 clade
EU374009,1,1498	1.17661e-05	0.000270617	1.22515e-05	0.000111616	0	1.02013e-06	3.95978e-06	0	0	0	0	0	0	0	Bacteria; Planctomycetes; Planctomycetacia; Planctomycetales; Planctomycetaceae; Rhodopirellula; uncultured bacterium
New,CleanUp,ReferenceOTU1088270	0.000166197	0.000125022	7.23954e-05	3.67964e-05	0	5.10064e-06	5.27971e-06	0	0	0	0	0	0	0	Bacteria; Chloroflexi; SAR202 clade; uncultured bacterium; uncultured bacterium; uncultured bacterium; uncultured bacterium
New,CleanUp,ReferenceOTU739212	9.85413e-05	0.00014243	0.000121402	4.17026e-05	0	2.04026e-06	3.95978e-06	0	0	0	0	0	0	0	Bacteria; Chloroflexi; SAR202 clade; uncultured Chloroflexus sp,; uncultured Chloroflexus sp,; uncultured Chloroflexus sp,; uncultured Chloroflexus sp,
New,CleanUp,ReferenceOTU1001130	8.97167e-05	0.000139265	7.90781e-05	0.000101803	0	0	0	0	0	0	0	0	0	0	Bacteria; Proteobacteria; Alphaproteobacteria; Rhodospirillales; Rhodospirillaceae; AEGEAN-169 marine group; uncultured bacterium
New,CleanUp,ReferenceOTU643467	9.85413e-05	9.49532e-05	0.000141449	6.25539e-05	0	1.22415e-05	0	0	0	0	0	0	0	0	Unassigned
New,CleanUp,ReferenceOTU1131935	0.000144135	0.000150343	5.23474e-05	6.25539e-05	0	0	0	0	0	0	0	0	0	0	Bacteria; Chloroflexi; SAR202 clade; uncultured bacterium; uncultured bacterium; uncultured bacterium; uncultured bacterium
New,CleanUp,ReferenceOTU883282	0.000167667	8.38754e-05	0.000124743	2.45309e-05	0	7.1409e-06	1.31993e-06	0	0	0	0	0	0	0	Bacteria; Candidate division BRC1; uncultured bacterium; uncultured bacterium; uncultured bacterium; uncultured bacterium; uncultured bacterium
New,CleanUp,ReferenceOTU742609	0.000186787	7.27975e-05	0.000122515	2.20778e-05	0	4.08051e-06	0	0	0	0	0	0	0	0	Bacteria; Planctomycetes; OM190; uncultured bacterium; uncultured bacterium; uncultured bacterium; uncultured bacterium
New,ReferenceOTU1317	0.000117661	0.000166168	0.000110264	1.3492e-05	0	0	0	0	0	0	0	0	0	0	Bacteria; Proteobacteria; Gammaproteobacteria; E01-9C-26 marine group; uncultured gamma proteobacterium; uncultured gamma proteobacterium; uncultured gamma proteobacterium
HQ674477,1,1519	5.0006e-05	0.000205732	5.01199e-05	9.93503e-05	0	1.02013e-06	0	0	0	0	0	0	0	0	Bacteria; Proteobacteria; Deltaproteobacteria; Sh765B-TzT-29; uncultured bacterium; uncultured bacterium; uncultured bacterium
New,ReferenceOTU1570	0.000180904	3.16511e-06	0.000157042	6.37804e-05	0	0	0	0	0	0	0	0	0	0	Bacteria; Firmicutes; Clostridia; Halanaerobiales; 64K2
New,CleanUp,ReferenceOTU973073	0.000164726	0.000134517	2.56168e-05	6.86866e-05	0	3.06038e-06	2.63985e-06	0	0	0	0	0	0	0	Unassigned
EU802328,1,1487	0.000160313	0.000167751	0	6.5007e-05	0	6.12077e-06	0	0	0	0	0	0	0	0	Bacteria; Proteobacteria; Gammaproteobacteria; Oceanospirillales; SAR86 clade; uncultured bacterium; uncultured bacterium
JX530988,1,1423	0.000123544	6.64673e-05	0.000138108	6.37804e-05	0	2.04026e-06	3.95978e-06	0	0	0	0	0	0	0	Bacteria; Bacteroidetes; Flavobacteriia; Flavobacteriales; Flavobacteriaceae
GU061308,1,1461	2.35322e-05	7.91277e-06	1.44791e-05	1.71717e-05	3.2542e-06	7.1409e-05	0.000260026	0	0	0	0	0	0	0	Bacteria; Proteobacteria; Gammaproteobacteria; Alteromonadales; Colwelliaceae; Colwellia
JX227247,1,1473	0.00013531	0.000121857	8.46469e-05	4.78353e-05	0	5.10064e-06	1.31993e-06	0	0	0	0	0	0	0	Bacteria; Proteobacteria; Alphaproteobacteria; Rhodospirillales; Rhodospirillaceae; uncultured; uncultured bacterium
New,ReferenceOTU1719	7.64798e-05	0.000167751	6.01439e-05	8.95379e-05	0	2.04026e-06	0	0	0	0	0	0	0	0	Unassigned
New,CleanUp,ReferenceOTU3771	1.76492e-05	0.000221558	3.89821e-05	0.000114069	0	1.02013e-06	0	0	0	0	0	0	0	0	Bacteria; Acidobacteria; Acidobacteria; Subgroup 6; uncultured Acidobacteria bacterium; uncultured Acidobacteria bacterium; uncultured Acidobacteria bacterium
AY375111,1,1451	3.52984e-05	2.05732e-05	7.4623e-05	0.000235497	0	2.04026e-05	6.59963e-06	0	0	0	0	0	0	0	Bacteria; Proteobacteria; Alphaproteobacteria; Sphingomonadales; Erythrobacteraceae
New,CleanUp,ReferenceOTU555387	0.000132369	0.0001361	5.4575e-05	6.74601e-05	0	1.02013e-06	0	0	0	0	0	0	0	0	Bacteria; Chloroflexi; TK10; uncultured Chloroflexi bacterium; uncultured Chloroflexi bacterium; uncultured Chloroflexi bacterium; uncultured Chloroflexi bacterium
New,ReferenceOTU1857	0.000127957	0	0.000197138	3.18902e-05	0	2.65233e-05	7.91956e-06	0	0	0	0	0	0	0	Bacteria; Proteobacteria; Gammaproteobacteria; Alteromonadales; Alteromonadaceae; Alteromonas
EU734964,1,1487	7.64798e-05	0.000163003	8.24194e-05	6.62335e-05	0	1.02013e-06	1.31993e-06	0	0	0	0	0	0	0	Bacteria; Acidobacteria; Acidobacteria; Subgroup 21; uncultured Acidobacterium sp,; uncultured Acidobacterium sp,; uncultured Acidobacterium sp,
New,CleanUp,ReferenceOTU457569	0.00013531	0.000106031	0.000103581	4.53822e-05	0	0	0	0	0	0	0	0	0	0	Bacteria; Chloroflexi; SAR202 clade
New,CleanUp,ReferenceOTU860169	5.88306e-05	9.02056e-05	0.000183773	5.1515e-05	0	4.08051e-06	1.31993e-06	0	0	0	0	0	0	0	Bacteria; Chloroflexi; SAR202 clade
New,CleanUp,ReferenceOTU498314	3.52984e-05	0.000205732	0.000103581	2.6984e-05	0	1.22415e-05	5.27971e-06	0	0	0	0	0	0	0	Bacteria; Planctomycetes; Planctomycetacia; Planctomycetales; Planctomycetaceae; Rhodopirellula; uncultured bacterium
JQ612190,1,1473	5.88306e-05	0.000178829	5.56888e-05	9.32176e-05	0	2.04026e-06	0	0	0	0	0	0	0	0	Bacteria; Acidobacteria; Acidobacteria; Subgroup 21; uncultured bacterium; uncultured bacterium; uncultured bacterium
New,ReferenceOTU2548	5.73599e-05	0.000218392	5.12337e-05	6.01008e-05	0	0	1.31993e-06	0	0	0	0	0	0	0	Bacteria; Planctomycetes; Phycisphaerae; Phycisphaerales; Phycisphaeraceae; Phycisphaera; uncultured bacterium
AF468320,1,1455	0	4.74766e-06	2.56168e-05	1.22655e-06	0	4.38655e-05	0.000312823	0	0	0	0	0	0	0	Bacteria; Proteobacteria; Gammaproteobacteria; Alteromonadales; Alteromonadaceae; Marinobacter
HQ673214,1,1515	7.64798e-05	0.000140847	5.01199e-05	0.000117749	0	1.02013e-06	1.31993e-06	0	0	0	0	0	0	0	Bacteria; Deferribacteres; Deferribacteres; Deferribacterales; SAR406 clade(Marine group A); uncultured bacterium; uncultured bacterium
New,CleanUp,ReferenceOTU167008	8.08921e-05	0.00021048	3.78684e-05	5.51946e-05	0	0	2.63985e-06	0	0	0	0	0	0	0	Bacteria; Planctomycetes; Phycisphaerae; Phycisphaerales; Phycisphaeraceae; Phycisphaera; uncultured organism
JN018907,1,1386	7.20675e-05	0.000140847	6.01439e-05	0.000111616	0	1.02013e-06	0	0	0	0	0	0	0	0	Bacteria; Acidobacteria; Acidobacteria; Subgroup 11; uncultured Acidobacteria bacterium; uncultured Acidobacteria bacterium; uncultured Acidobacteria bacterium
JX227500,1,1456	9.4129e-05	0.000145595	5.01199e-05	9.1991e-05	0	3.06038e-06	0	0	0	0	0	0	0	0	Bacteria; Acidobacteria; Acidobacteria; Subgroup 5; uncultured bacterium; uncultured bacterium; uncultured bacterium
New,CleanUp,ReferenceOTU833381	2.94153e-05	0	9.80122e-05	4.78353e-05	0	6.93687e-05	0.000139912	0	0	0	0	0	0	0	Bacteria; Proteobacteria; Gammaproteobacteria; Alteromonadales; Alteromonadaceae
New,ReferenceOTU1222	0.000120603	0.000144012	6.12577e-05	5.64212e-05	0	2.04026e-06	0	0	0	0	0	0	0	0	Bacteria; Proteobacteria; Alphaproteobacteria; Sneathiellales; Sneathiellaceae; uncultured; uncultured alpha proteobacterium
New,CleanUp,ReferenceOTU579167	0.000100012	0.00015509	8.01918e-05	4.53822e-05	0	3.06038e-06	0	0	0	0	0	0	0	0	Bacteria; Chloroflexi; JG30-KF-CM66
HM799039,1,1388	0.000111778	0.000118692	6.79403e-05	7.97255e-05	0	2.04026e-06	1.31993e-06	0	0	0	0	0	0	0	Bacteria; Proteobacteria; Alphaproteobacteria; SAR11 clade; Deep 1; uncultured bacterium; uncultured bacterium
New,CleanUp,ReferenceOTU926340	8.23629e-05	9.33707e-05	9.80122e-05	0.00010303	0	3.06038e-06	1.31993e-06	0	0	0	0	0	0	0	Bacteria; Chloroflexi; SAR202 clade; uncultured bacterium; uncultured bacterium; uncultured bacterium; uncultured bacterium
KF597125,1,1433	0.00015296	0.000121857	6.23714e-05	4.0476e-05	0	3.06038e-06	0	0	0	0	0	0	0	0	Bacteria; Chloroflexi; SAR202 clade; uncultured bacterium; uncultured bacterium; uncultured bacterium; uncultured bacterium
FJ615485,1,944	0.000101483	0.000134517	8.46469e-05	5.51946e-05	0	2.04026e-06	1.31993e-06	0	0	0	0	0	0	0	Archaea; Thaumarchaeota; Marine Benthic Group A; uncultured marine crenarchaeote; uncultured marine crenarchaeote; uncultured marine crenarchaeote; uncultured marine crenarchaeote
New,CleanUp,ReferenceOTU521278	0.000120603	1.58255e-06	0.000223869	3.31168e-05	0	0	0	0	0	0	0	0	0	0	Bacteria; Proteobacteria; Gammaproteobacteria; Alteromonadales; Idiomarinaceae; Idiomarina
JN018973,1,1384	7.79506e-05	0.000193072	2.33893e-05	8.21786e-05	0	1.02013e-06	1.31993e-06	0	0	0	0	0	0	0	Bacteria; Proteobacteria; Gammaproteobacteria; Order Incertae Sedis; Family Incertae Sedis; Marinicella
JX529332,1,1400	0.000139723	7.91277e-05	8.9102e-05	6.99132e-05	0	1.02013e-06	0	0	0	0	0	0	0	0	Bacteria; Planctomycetes; Phycisphaerae; Phycisphaerales; Phycisphaeraceae; FS140-16B-02 marine group; uncultured bacterium
New,CleanUp,ReferenceOTU457212	0.0001912	4.11464e-05	9.68985e-05	4.29291e-05	0	6.12077e-06	0	0	0	0	0	0	0	0	Bacteria; Chloroflexi; SAR202 clade
FQ032819,21712,23225	0.000144135	0.000106031	8.9102e-06	0.000104256	0	8.16103e-06	6.59963e-06	0	0	0	0	0	0	0	Bacteria; Bacteroidetes; Flavobacteriia; Flavobacteriales; Flavobacteriaceae; NS4 marine group
HQ721418,1,1457	9.70705e-05	0.000132935	8.9102e-05	4.53822e-05	0	1.32617e-05	0	0	0	0	0	0	0	0	Bacteria; Proteobacteria; Gammaproteobacteria; Oceanospirillales; Halomonadaceae; Halomonas
New,ReferenceOTU588	7.05967e-05	0.000137682	0.000103581	6.01008e-05	0	3.06038e-06	2.63985e-06	0	0	0	0	0	0	0	Bacteria; Deferribacteres; Deferribacteres; Deferribacterales; Deferribacterales Incertae Sedis; Caldithrix; uncultured bacterium
New,ReferenceOTU1098	8.82459e-05	0	0.000255055	4.90619e-06	0	5.10064e-06	2.37587e-05	0	0	0	0	0	0	0	Bacteria; Proteobacteria; Gammaproteobacteria; Alteromonadales; Idiomarinaceae; Idiomarina
New,CleanUp,ReferenceOTU1001022	0.000127957	0.000110779	9.02158e-05	4.66088e-05	0	1.02013e-06	0	0	0	0	0	0	0	0	Bacteria; Chloroflexi; Anaerolineae; Anaerolineales; Anaerolineaceae; uncultured; uncultured Chloroflexi bacterium
AB694403,1,1368	7.64798e-05	0.000178829	6.90541e-05	4.66088e-05	0	5.10064e-06	0	0	0	0	0	0	0	0	Bacteria; Proteobacteria; Alphaproteobacteria; OCS116 clade; uncultured bacterium; uncultured bacterium; uncultured bacterium
New,ReferenceOTU1333	6.61845e-05	0.000137682	6.12577e-05	0.000107936	0	1.02013e-06	1.31993e-06	0	0	0	0	0	0	0	Bacteria
DQ300544,1,1291	8.23629e-05	0.000151925	2.45031e-05	0.000105483	0	5.10064e-06	3.95978e-06	0	0	0	0	0	0	0	Archaea; Thaumarchaeota; AK59
GQ348687,1,1393	0.00015443	1.10779e-05	0.000132539	7.23663e-05	0	2.04026e-06	0	0	0	0	0	0	0	0	Bacteria; Planctomycetes; Planctomycetacia; Planctomycetales; Planctomycetaceae; Rhodopirellula; uncultured planctomycete
New,CleanUp,ReferenceOTU317268	8.82459e-05	0.000117109	0.000129198	3.55699e-05	0	2.04026e-06	0	0	0	0	0	0	0	0	Unassigned
New,ReferenceOTU2306	9.85413e-05	0.000145595	6.23714e-05	6.5007e-05	0	0	0	0	0	0	0	0	0	0	Bacteria; Acidobacteria; Acidobacteria; Subgroup 6; uncultured bacterium; uncultured bacterium; uncultured bacterium
BANL01000049,26,1303	7.35383e-06	0	2.33893e-05	3.8023e-05	0	0.000300938	0	0	0	0	0	0	0	0	Bacteria; Proteobacteria; Gammaproteobacteria; Alteromonadales; Idiomarinaceae; Idiomarina
New,CleanUp,ReferenceOTU599859	9.4129e-05	0.000117109	7.57367e-05	7.35928e-05	0	3.06038e-06	3.95978e-06	0	0	0	0	0	0	0	Unassigned
JQ222528,1,914	8.53044e-05	0.000147178	6.23714e-05	6.86866e-05	0	0	3.95978e-06	0	0	0	0	0	0	0	Archaea; Thaumarchaeota; Marine Group I; uncultured marine archaeon; uncultured marine archaeon; uncultured marine archaeon; uncultured marine archaeon
EU373967,1,1522	6.17722e-05	0.000129769	0.000105809	6.13273e-05	0	7.1409e-06	1.31993e-06	0	0	0	0	0	0	0	Bacteria; Acidobacteria; Acidobacteria; Subgroup 6
JX240941,1,1440	7.79506e-05	0	1.33653e-05	0	0	0.000104053	0.00017159	0	0	0	0	0	0	0	Bacteria; Proteobacteria; Gammaproteobacteria; Thiotrichales; Piscirickettsiaceae; Methylophaga
EU802453,1,1267	0.000120603	0.000110779	1.11378e-06	0.000130014	0	3.06038e-06	1.31993e-06	0	0	0	0	0	0	0	Bacteria; Proteobacteria; Alphaproteobacteria; Rickettsiales; S25-593; uncultured bacterium; uncultured bacterium
New,ReferenceOTU1430	0.00017208	1.58255e-05	0.000165953	8.58583e-06	0	4.08051e-06	0	0	0	0	0	0	0	0	Bacteria; Proteobacteria; Gammaproteobacteria; Oceanospirillales; Halomonadaceae; Halomonas; uncultured Halomonas sp,
New,CleanUp,ReferenceOTU158578	9.26582e-05	0.000110779	0.000145905	1.22655e-05	0	4.08051e-06	0	0	0	0	0	0	0	0	Unassigned
HM799062,1,1404	3.82399e-05	0.000164586	6.4599e-05	9.32176e-05	0	3.06038e-06	1.31993e-06	0	0	0	0	0	0	0	Bacteria; Planctomycetes; Planctomycetacia; Planctomycetales; Planctomycetaceae; Pir4 lineage; uncultured bacterium
HQ673938,1,1500	0.000105895	0.000117109	5.68026e-05	7.72725e-05	0	5.10064e-06	2.63985e-06	0	0	0	0	0	0	0	Bacteria; Proteobacteria; Gammaproteobacteria; Alteromonadales; Alteromonadaceae; uncultured
New,CleanUp,ReferenceOTU1099199	9.11875e-05	0.000107614	0.000108036	5.76477e-05	0	0	0	0	0	0	0	0	0	0	Bacteria; Proteobacteria; Deltaproteobacteria; SAR324 clade(Marine group B); uncultured bacterium; uncultured bacterium; uncultured bacterium
JN166357,1,1436	5.29476e-05	0.000126604	5.12337e-05	0.000125108	0	3.06038e-06	2.63985e-06	0	0	0	0	0	0	0	Bacteria; Proteobacteria; Alphaproteobacteria; SAR11 clade; Surface 1; uncultured bacterium; uncultured bacterium
New,ReferenceOTU2505	2.35322e-05	0.000213645	1.0024e-05	0.000112842	0	0	0	0	0	0	0	0	0	0	Bacteria; Proteobacteria; Gammaproteobacteria; Oceanospirillales; SAR86 clade; uncultured bacterium; uncultured bacterium
New,ReferenceOTU1244	0.000158843	8.8623e-05	7.79643e-05	3.18902e-05	0	2.04026e-06	0	0	0	0	0	0	0	0	Bacteria; Chloroflexi; SAR202 clade; uncultured marine microorganism; uncultured marine microorganism; uncultured marine microorganism; uncultured marine microorganism
New,CleanUp,ReferenceOTU35822	9.4129e-05	0.000107614	0.000120288	3.67964e-05	0	0	0	0	0	0	0	0	0	0	Bacteria; Chloroflexi; SAR202 clade
GU235074,1,1358	8.38336e-05	0.000121857	6.4599e-05	8.34052e-05	0	4.08051e-06	0	0	0	0	0	0	0	0	Bacteria; Proteobacteria; Deltaproteobacteria; SAR324 clade(Marine group B); uncultured bacterium; uncultured bacterium; uncultured bacterium
GQ347288,1,1349	5.58891e-05	0.000167751	4.4551e-05	8.58583e-05	1.08473e-06	0	2.63985e-06	0	0	0	0	0	0	0	Bacteria; Proteobacteria; Deltaproteobacteria; Desulfobacterales; Nitrospinaceae; Nitrospina; uncultured delta proteobacterium
DQ513087,1,1497	7.05967e-05	9.81183e-05	5.56888e-05	0.000127561	0	4.08051e-06	0	0	0	0	0	0	0	0	Bacteria; Acidobacteria; Acidobacteria; Subgroup 5
New,CleanUp,ReferenceOTU545569	0.000100012	9.81183e-05	9.80122e-05	5.88743e-05	0	0	0	0	0	0	0	0	0	0	Bacteria; Deferribacteres; Deferribacteres; Deferribacterales; SAR406 clade(Marine group A); uncultured bacterium; uncultured bacterium
New,ReferenceOTU1730	0.000111778	0.000106031	7.01679e-05	6.01008e-05	0	2.04026e-06	3.95978e-06	0	0	0	0	0	0	0	Bacteria; Chloroflexi; SAR202 clade; uncultured Chloroflexi bacterium; uncultured Chloroflexi bacterium; uncultured Chloroflexi bacterium; uncultured Chloroflexi bacterium
AY375095,1,1253	0.000127957	4.43115e-05	0.000151473	2.57575e-05	0	4.08051e-06	0	0	0	0	0	0	0	0	Bacteria; Acidobacteria; Subgroup 26; uncultured bacterium; uncultured bacterium; uncultured bacterium; uncultured bacterium
DQ071154,1,1454	8.67752e-05	0.000191489	0	6.13273e-05	0	1.32617e-05	0	0	0	0	0	0	0	0	Bacteria; Proteobacteria; Gammaproteobacteria; Oceanospirillales; SAR86 clade
New,CleanUp,ReferenceOTU961394	0.000100012	8.70405e-05	0.00010915	4.90619e-05	0	7.1409e-06	0	0	0	0	0	0	0	0	Bacteria; Chloroflexi; SAR202 clade
KF859626,1,1511	0.000104424	2.8486e-05	0.000188228	1.71717e-05	0	9.18115e-06	3.95978e-06	0	0	0	0	0	0	0	Bacteria; Proteobacteria; Gammaproteobacteria; Alteromonadales; Alteromonadaceae; Marinobacter; uncultured Halomonas sp,
GQ263375,1,1451	6.9126e-05	0.00015509	5.23474e-05	6.37804e-05	0	5.10064e-06	0	0	0	0	0	0	0	0	Bacteria; Acidobacteria; Acidobacteria; Subgroup 3; PAUC26f; uncultured bacterium; uncultured bacterium
HQ674603,1,1520	0.000105895	4.58941e-05	8.46469e-05	0.000104256	0	4.08051e-06	0	0	0	0	0	0	0	0	Bacteria
New,ReferenceOTU2420	7.05967e-05	0.000123439	6.57128e-05	7.72725e-05	0	6.12077e-06	0	0	0	0	0	0	0	0	Bacteria; Planctomycetes; Phycisphaerae; Phycisphaerales; Phycisphaeraceae; Urania-1B-19 marine sediment group; uncultured bacterium
New,ReferenceOTU1455	9.4129e-05	0.00014876	8.13056e-05	1.83982e-05	0	0	0	0	0	0	0	0	0	0	Bacteria; Proteobacteria; Gammaproteobacteria; Oceanospirillales; Halomonadaceae; Halomonas
New,CleanUp,ReferenceOTU842161	3.67691e-05	0.000140847	9.35571e-05	7.11397e-05	0	0	0	0	0	0	0	0	0	0	Bacteria; Lentisphaerae; LD1-PB3
HQ163750,1,1375	0.000220615	4.58941e-05	2.56168e-05	4.41557e-05	0	2.04026e-06	3.95978e-06	0	0	0	0	0	0	0	Bacteria; Proteobacteria; Gammaproteobacteria; Oceanospirillales; SUP05 cluster; uncultured gamma proteobacterium; uncultured gamma proteobacterium
JX530724,1,1399	5.73599e-05	7.12149e-05	0.000142563	6.37804e-05	0	6.12077e-06	0	0	0	0	0	0	0	0	Bacteria; Planctomycetes; Phycisphaerae; Phycisphaerales; Phycisphaeraceae; FS140-16B-02 marine group; uncultured bacterium
New,CleanUp,ReferenceOTU954392	8.38336e-05	9.49532e-05	6.4599e-05	9.44441e-05	0	0	2.63985e-06	0	0	0	0	0	0	0	Bacteria; Verrucomicrobia; Arctic97B-4 marine group
HQ673707,1,1277	0.000110307	0.000118692	6.01439e-05	5.02884e-05	0	1.02013e-06	0	0	0	0	0	0	0	0	Bacteria; Chloroflexi; SAR202 clade; uncultured bacterium; uncultured bacterium; uncultured bacterium; uncultured bacterium
HQ672929,1,1437	8.97167e-05	0.000107614	6.34852e-05	7.72725e-05	0	1.02013e-06	1.31993e-06	0	0	0	0	0	0	0	Bacteria; Proteobacteria; Alphaproteobacteria; SAR11 clade; Deep 1; uncultured bacterium; uncultured bacterium
New,CleanUp,ReferenceOTU482292	9.55998e-05	9.65358e-05	7.57367e-05	6.74601e-05	0	1.02013e-06	3.95978e-06	0	0	0	0	0	0	0	Bacteria; Chloroflexi; SAR202 clade; uncultured bacterium; uncultured bacterium; uncultured bacterium; uncultured bacterium
New,ReferenceOTU635	4.11814e-05	0.000145595	6.01439e-05	9.32176e-05	0	0	0	0	0	0	0	0	0	0	Bacteria; Proteobacteria; Deltaproteobacteria; Desulfuromonadales; GR-WP33-58; uncultured bacterium; uncultured bacterium
AB176219,1,1449	0	9.33707e-05	0.000241689	0	0	3.06038e-06	1.31993e-06	0	0	0	0	0	0	0	Bacteria; Proteobacteria; Alphaproteobacteria; Sphingomonadales; Erythrobacteraceae; Porphyrobacter
JN018636,1,912	0.000189729	3.32336e-05	9.24434e-05	2.33044e-05	0	0	0	0	0	0	0	0	0	0	Archaea; Euryarchaeota; Thermoplasmata; Thermoplasmatales; Marine Group II; uncultured marine group II euryarchaeote; uncultured marine group II euryarchaeote
New,ReferenceOTU1508	7.20675e-05	0.000139265	3.89821e-05	8.83114e-05	0	0	0	0	0	0	0	0	0	0	Bacteria; Proteobacteria; Alphaproteobacteria; Rhodospirillales; Rhodospirillaceae; AEGEAN-169 marine group; uncultured bacterium
JN018836,1,1368	7.79506e-05	8.54579e-05	0.000133653	3.92495e-05	1.08473e-06	1.02013e-06	0	0	0	0	0	0	0	0	Bacteria; Proteobacteria; Deltaproteobacteria; Bdellovibrionales; Bdellovibrionaceae; OM27 clade; uncultured bacterium
New,CleanUp,ReferenceOTU1094099	0.000147077	7.91277e-05	7.35092e-05	2.82106e-05	0	1.02013e-05	0	0	0	0	0	0	0	0	Bacteria; Chloroflexi; SAR202 clade
New,CleanUp,ReferenceOTU1058758	4.26522e-05	0.000234218	5.56888e-06	5.1515e-05	0	0	3.95978e-06	0	0	0	0	0	0	0	Bacteria; Planctomycetes; Phycisphaerae; Phycisphaerales; Phycisphaeraceae; Phycisphaera
GU061386,1,1471	6.47137e-05	9.97009e-05	8.9102e-06	0.000160678	0	3.06038e-06	0	0	0	0	0	0	0	0	Bacteria; Proteobacteria; Gammaproteobacteria; Oceanospirillales; SAR86 clade; uncultured bacterium; uncultured bacterium
HQ673107,1,1420	0.000108837	8.38754e-05	8.57607e-05	5.51946e-05	0	2.04026e-06	1.31993e-06	0	0	0	0	0	0	0	Bacteria; Proteobacteria; Deltaproteobacteria; SAR324 clade(Marine group B); uncultured bacterium; uncultured bacterium; uncultured bacterium
HQ163165,1,1369	0.00017355	4.2729e-05	4.56648e-05	7.11397e-05	0	2.04026e-06	0	0	0	0	0	0	0	0	Bacteria; Proteobacteria; Deltaproteobacteria; Bdellovibrionales; Bdellovibrionaceae; OM27 clade; uncultured delta proteobacterium
New,CleanUp,ReferenceOTU756851	0.000120603	5.22243e-05	8.01918e-05	7.60459e-05	0	0	3.95978e-06	0	0	0	0	0	0	0	Bacteria; Candidate division BRC1; uncultured bacterium; uncultured bacterium; uncultured bacterium; uncultured bacterium; uncultured bacterium
New,CleanUp,ReferenceOTU193060	0.000136781	8.70405e-05	5.79163e-05	4.90619e-05	0	2.04026e-06	0	0	0	0	0	0	0	0	Bacteria; Chloroflexi; SAR202 clade; uncultured Chloroflexi bacterium; uncultured Chloroflexi bacterium; uncultured Chloroflexi bacterium; uncultured Chloroflexi bacterium
JN018862,1,1357	0.00011472	0.000147178	5.01199e-05	1.59451e-05	0	1.02013e-06	2.63985e-06	0	0	0	0	0	0	0	Bacteria; Chloroflexi; SAR202 clade
EU132273,1,1364	3.52984e-05	0.000144012	7.35092e-05	7.35928e-05	0	1.02013e-06	3.95978e-06	0	0	0	0	0	0	0	Bacteria; Acidobacteria; Acidobacteria; Subgroup 6; uncultured bacterium; uncultured bacterium; uncultured bacterium
HQ673640,1,1501	6.47137e-05	0.000137682	7.4623e-05	5.27415e-05	0	0	0	0	0	0	0	0	0	0	Bacteria; Verrucomicrobia; Opitutae; MB11C04 marine group; uncultured bacterium; uncultured bacterium; uncultured bacterium
New,CleanUp,ReferenceOTU985241	6.61845e-05	0.000117109	9.80122e-05	4.53822e-05	0	2.04026e-06	0	0	0	0	0	0	0	0	Bacteria; Lentisphaerae; WCHB1-41
New,CleanUp,ReferenceOTU462784	8.08921e-05	6.96324e-05	0.000154815	1.71717e-05	0	3.06038e-06	2.63985e-06	0	0	0	0	0	0	0	Bacteria; Acidobacteria; Acidobacteria; Subgroup 3; PAUC26f; uncultured Acidobacteria bacterium; uncultured Acidobacteria bacterium
GQ060913,1,1344	2.94153e-05	0.000150343	8.46469e-05	4.29291e-05	0	1.73422e-05	2.63985e-06	0	0	0	0	0	0	0	Bacteria; Actinobacteria; Actinobacteria; Corynebacteriales; Corynebacteriaceae; Corynebacterium; uncultured bacterium
AM997978,1,1487	2.20615e-05	0.000172498	7.01679e-05	5.51946e-05	0	4.08051e-06	1.31993e-06	0	0	0	0	0	0	0	Bacteria; Planctomycetes; Planctomycetacia; Planctomycetales; Planctomycetaceae; uncultured
FJ205233,1,1487	3.38276e-05	0.000191489	7.79643e-06	8.83114e-05	0	1.02013e-06	2.63985e-06	0	0	0	0	0	0	0	Bacteria; Acidobacteria; Acidobacteria; Subgroup 6
FJ628238,1,1476	4.26522e-05	1.58255e-06	8.9102e-05	0	0	5.30467e-05	0.000138592	0	0	0	0	0	0	0	Bacteria; Proteobacteria; Gammaproteobacteria; Oceanospirillales; SUP05 cluster; uncultured bacterium; uncultured bacterium
GQ337158,1,1453	0.000107366	7.438e-05	8.13056e-05	4.90619e-05	0	1.02013e-05	2.63985e-06	0	0	0	0	0	0	0	Bacteria; Proteobacteria; Alphaproteobacteria; Rhodospirillales; Rhodospirillaceae; Defluviicoccus; uncultured bacterium
New,CleanUp,ReferenceOTU1103800	0.000117661	7.59626e-05	0.000103581	2.57575e-05	0	0	0	0	0	0	0	0	0	0	Unassigned
DQ396242,1,1498	4.55937e-05	0.000181994	5.68026e-05	3.31168e-05	0	2.04026e-06	2.63985e-06	0	0	0	0	0	0	0	Bacteria; Proteobacteria; Alphaproteobacteria; Rhodospirillales; Rhodospirillaceae; uncultured; uncultured bacterium
New,ReferenceOTU539	8.53044e-05	0.000123439	5.4575e-05	5.64212e-05	0	1.02013e-06	1.31993e-06	0	0	0	0	0	0	0	Bacteria; Chloroflexi; SAR202 clade
New,CleanUp,ReferenceOTU1003099	8.08921e-05	0.000126604	4.23235e-05	6.86866e-05	0	2.04026e-06	1.31993e-06	0	0	0	0	0	0	0	Bacteria; Chloroflexi; SAR202 clade
New,ReferenceOTU1420	8.08921e-05	0.000101283	8.68745e-05	5.1515e-05	0	1.02013e-06	0	0	0	0	0	0	0	0	Bacteria; Chloroflexi; SAR202 clade
KC873666,1,1404	0.000129427	9.33707e-05	3.34133e-06	8.46317e-05	0	9.18115e-06	1.31993e-06	0	0	0	0	0	0	0	Bacteria; Bacteroidetes; Flavobacteriia; Flavobacteriales; Flavobacteriaceae; NS4 marine group
JN886929,1,1517	6.03014e-05	0.00015509	4.90061e-05	5.27415e-05	0	0	3.95978e-06	0	0	0	0	0	0	0	Bacteria; Acidobacteria; Acidobacteria; Subgroup 6
JQ220915,1,914	0.000101483	7.27975e-05	9.46709e-05	4.41557e-05	1.08473e-06	4.08051e-06	2.63985e-06	0	0	0	0	0	0	0	Archaea; Euryarchaeota; Thermoplasmata; Thermoplasmatales; Marine Group II
New,CleanUp,ReferenceOTU870131	9.70705e-05	1.26604e-05	0.000196024	1.47186e-05	0	0	0	0	0	0	0	0	0	0	Bacteria; Proteobacteria; Deltaproteobacteria; SAR324 clade(Marine group B); uncultured bacterium; uncultured bacterium; uncultured bacterium
EF646124,1,1513	0.000110307	7.75451e-05	5.4575e-05	7.48194e-05	0	3.06038e-06	0	0	0	0	0	0	0	0	Bacteria; Proteobacteria; Deltaproteobacteria; Myxococcales; uncultured; uncultured bacterium; uncultured bacterium
New,CleanUp,ReferenceOTU131869	4.11814e-05	0.000144012	4.78923e-05	8.70848e-05	0	0	0	0	0	0	0	0	0	0	Bacteria; Planctomycetes; Pla3 lineage; uncultured bacterium; uncultured bacterium; uncultured bacterium; uncultured bacterium
New,CleanUp,ReferenceOTU936517	6.47137e-05	8.54579e-05	9.35571e-05	7.11397e-05	0	0	5.27971e-06	0	0	0	0	0	0	0	Bacteria; Proteobacteria; Alphaproteobacteria; Rhodospirillales; Rhodospirillaceae; AEGEAN-169 marine group; uncultured bacterium
New,ReferenceOTU1411	7.35383e-05	0.000139265	4.67786e-05	4.66088e-05	0	3.06038e-06	9.23948e-06	0	0	0	0	0	0	0	Bacteria; Chloroflexi; JG30-KF-CM66
New,CleanUp,ReferenceOTU556517	8.53044e-05	5.85545e-05	0.00010915	5.88743e-05	0	4.08051e-06	1.31993e-06	0	0	0	0	0	0	0	Unassigned
New,ReferenceOTU651	2.20615e-05	0.000181994	5.01199e-05	6.13273e-05	0	0	1.31993e-06	0	0	0	0	0	0	0	Bacteria; Acidobacteria; Acidobacteria; Subgroup 6; uncultured bacterium; uncultured bacterium; uncultured bacterium
New,CleanUp,ReferenceOTU1060491	0	0.000181994	1.78204e-05	0.000112842	0	0	3.95978e-06	0	0	0	0	0	0	0	Bacteria; Acidobacteria; Acidobacteria; Subgroup 6; uncultured bacterium; uncultured bacterium; uncultured bacterium
New,CleanUp,ReferenceOTU1140690	4.11814e-05	0.000174081	3.67546e-05	6.37804e-05	0	0	0	0	0	0	0	0	0	0	Bacteria; Acidobacteria; Acidobacteria; Subgroup 6; uncultured bacterium; uncultured bacterium; uncultured bacterium
New,CleanUp,ReferenceOTU661289	5.29476e-05	0.000104449	2.45031e-05	0.000127561	0	6.12077e-06	0	0	0	0	0	0	0	0	Bacteria; Proteobacteria; Gammaproteobacteria; Thiotrichales; Thiotrichales Incertae Sedis; Candidatus Endoecteinascidia; uncultured gamma proteobacterium
New,CleanUp,ReferenceOTU897773	4.85353e-05	3.79813e-05	0.000207162	7.35928e-06	0	5.10064e-06	7.91956e-06	0	0	0	0	0	0	0	Unassigned
New,CleanUp,ReferenceOTU704372	9.11875e-05	0.000115526	8.24194e-05	2.33044e-05	0	1.02013e-06	0	0	0	0	0	0	0	0	Bacteria; Chloroflexi; SAR202 clade
New,CleanUp,ReferenceOTU618444	0.000104424	9.17881e-05	4.12097e-05	7.35928e-05	0	1.02013e-06	1.31993e-06	0	0	0	0	0	0	0	Bacteria; Chloroflexi; SAR202 clade; uncultured Chloroflexi bacterium; uncultured Chloroflexi bacterium; uncultured Chloroflexi bacterium; uncultured Chloroflexi bacterium
New,CleanUp,ReferenceOTU837601	2.5003e-05	0.000215227	2.22755e-06	6.99132e-05	0	0	0	0	0	0	0	0	0	0	Bacteria; Planctomycetes; Phycisphaerae; Phycisphaerales; Phycisphaeraceae; Phycisphaera; uncultured bacterium
HM798932,1,1423	0.000111778	4.43115e-05	0.000123629	2.57575e-05	0	4.08051e-06	2.63985e-06	0	0	0	0	0	0	0	Bacteria; Planctomycetes; Phycisphaerae; Phycisphaerales; Phycisphaeraceae; CL500-3; uncultured bacterium
New,CleanUp,ReferenceOTU1039525	1.17661e-05	0.000183576	0	0.000114069	0	0	1.31993e-06	0	0	0	0	0	0	0	Unassigned
New,CleanUp,ReferenceOTU313243	3.38276e-05	0.000134517	7.79643e-05	6.13273e-05	0	0	1.31993e-06	0	0	0	0	0	0	0	Bacteria; Planctomycetes; OM190
New,ReferenceOTU2342	9.55998e-05	4.43115e-05	6.57128e-05	9.32176e-05	0	8.16103e-06	1.31993e-06	0	0	0	0	0	0	0	Bacteria; Chloroflexi; SAR202 clade; uncultured bacterium; uncultured bacterium; uncultured bacterium; uncultured bacterium
New,CleanUp,ReferenceOTU422047	8.97167e-05	9.49532e-06	0.000189342	1.96248e-05	0	0	0	0	0	0	0	0	0	0	Unassigned
New,CleanUp,ReferenceOTU585817	0.00013384	7.91277e-05	4.56648e-05	4.41557e-05	0	5.10064e-06	0	0	0	0	0	0	0	0	Bacteria; Chloroflexi; SAR202 clade; uncultured bacterium; uncultured bacterium; uncultured bacterium; uncultured bacterium
New,CleanUp,ReferenceOTU114444	1.912e-05	0	4.78923e-05	6.13273e-06	0	0.000213207	2.11188e-05	0	0	0	0	0	0	0	Bacteria; Proteobacteria; Gammaproteobacteria; Alteromonadales; Alteromonadaceae; Alteromonas; uncultured bacterium
JQ612211,1,1478	5.14768e-05	0.0001361	4.90061e-05	6.25539e-05	0	3.06038e-06	3.95978e-06	0	0	0	0	0	0	0	Bacteria; Acidobacteria; Acidobacteria; Subgroup 3; PAUC26f; uncultured bacterium; uncultured bacterium
DI101254,11,1525	4.70645e-05	1.10779e-05	5.79163e-05	0.000156998	0	2.95837e-05	1.31993e-06	0	0	0	0	0	0	0	Bacteria; Proteobacteria; Gammaproteobacteria; Alteromonadales; Alteromonadaceae; Alteromonas
New,ReferenceOTU1566	7.5009e-05	0.000170916	1.78204e-05	3.31168e-05	0	0	5.27971e-06	0	0	0	0	0	0	0	Bacteria; Bacteroidetes; Flavobacteriia; Flavobacteriales; Flavobacteriaceae; Muricauda
New,CleanUp,ReferenceOTU396806	7.5009e-05	9.49532e-05	9.68985e-05	3.43433e-05	0	0	0	0	0	0	0	0	0	0	Bacteria; Chloroflexi; SAR202 clade; uncultured bacterium; uncultured bacterium; uncultured bacterium; uncultured bacterium
New,CleanUp,ReferenceOTU19935	9.26582e-05	7.91277e-05	7.01679e-05	5.88743e-05	0	0	0	0	0	0	0	0	0	0	Bacteria; Chloroflexi; SAR202 clade
New,CleanUp,ReferenceOTU519763	0.000119132	7.27975e-05	3.89821e-05	6.99132e-05	0	0	0	0	0	0	0	0	0	0	Bacteria; Chloroflexi; SAR202 clade; uncultured Chloroflexi bacterium; uncultured Chloroflexi bacterium; uncultured Chloroflexi bacterium; uncultured Chloroflexi bacterium
New,CleanUp,ReferenceOTU810218	7.79506e-05	0.000117109	4.23235e-05	6.13273e-05	0	2.04026e-06	0	0	0	0	0	0	0	0	Bacteria; Acidobacteria; Acidobacteria; Subgroup 6; uncultured bacterium; uncultured bacterium; uncultured bacterium
New,CleanUp,ReferenceOTU28795	5.29476e-05	0.000102866	4.00959e-05	0.000101803	0	2.04026e-06	0	0	0	0	0	0	0	0	Unassigned
New,CleanUp,ReferenceOTU720580	6.03014e-05	0.000102866	7.23954e-05	5.51946e-05	0	8.16103e-06	0	0	0	0	0	0	0	0	Bacteria; Proteobacteria; Deltaproteobacteria; Desulfuromonadales; GR-WP33-58; uncultured marine bacterium; uncultured marine bacterium
New,ReferenceOTU2601	3.23568e-05	2.21558e-05	0.000210504	2.20778e-05	0	8.16103e-06	2.63985e-06	0	0	0	0	0	0	0	Unassigned
AY726922,1,1205	6.03014e-05	6.48847e-05	8.01918e-05	9.1991e-05	0	0	0	0	0	0	0	0	0	0	Bacteria; Proteobacteria; Alphaproteobacteria; SAR11 clade; Surface 1
New,CleanUp,ReferenceOTU984870	8.08921e-05	6.96324e-05	9.02158e-05	1.10389e-05	0	4.08051e-05	3.95978e-06	0	0	0	0	0	0	0	Bacteria; Proteobacteria; Epsilonproteobacteria; Campylobacterales; Helicobacteraceae; Sulfurimonas; uncultured bacterium
New,CleanUp,ReferenceOTU494031	0.000104424	0.000129769	3.22995e-05	2.45309e-05	0	5.10064e-06	0	0	0	0	0	0	0	0	Bacteria; Chloroflexi; SAR202 clade; uncultured Chloroflexi bacterium; uncultured Chloroflexi bacterium; uncultured Chloroflexi bacterium; uncultured Chloroflexi bacterium
New,CleanUp,ReferenceOTU394331	7.35383e-05	7.27975e-05	6.01439e-05	7.60459e-05	0	4.08051e-06	7.91956e-06	0	0	0	0	0	0	0	Bacteria; Chloroflexi; SAR202 clade
New,CleanUp,ReferenceOTU98741	4.85353e-05	1.4243e-05	0.000228324	1.22655e-06	0	2.04026e-06	0	0	0	0	0	0	0	0	Bacteria; Proteobacteria; Gammaproteobacteria; Oceanospirillales; Alcanivoracaceae; Alcanivorax
New,CleanUp,ReferenceOTU610475	7.35383e-05	8.38754e-05	4.23235e-05	9.32176e-05	0	1.02013e-06	0	0	0	0	0	0	0	0	Bacteria; Proteobacteria; Gammaproteobacteria; Order Incertae Sedis; Family Incertae Sedis; Marinicella; uncultured bacterium
HQ674573,1,1457	4.55937e-05	0.000158255	1.89342e-05	6.99132e-05	0	1.02013e-06	0	0	0	0	0	0	0	0	Bacteria; Proteobacteria; Alphaproteobacteria; SAR11 clade
EU804525,1,1381	0.000141193	9.97009e-05	4.4551e-06	4.41557e-05	0	0	3.95978e-06	0	0	0	0	0	0	0	Bacteria; Proteobacteria; Alphaproteobacteria; Rickettsiales; SAR116 clade; uncultured bacterium; uncultured bacterium
New,CleanUp,ReferenceOTU778925	0.000104424	7.75451e-05	8.79883e-05	2.33044e-05	0	0	0	0	0	0	0	0	0	0	Bacteria; Proteobacteria; Alphaproteobacteria; SAR11 clade; Surface 1; uncultured marine bacterium; uncultured marine bacterium
JX945371,1,1498	0.000102954	0.000110779	0	6.5007e-05	0	1.42818e-05	0	0	0	0	0	0	0	0	Bacteria; Proteobacteria; Gammaproteobacteria; Oceanospirillales; SAR86 clade; uncultured bacterium; uncultured bacterium
EU491201,1,1462	0.000104424	6.33022e-05	8.57607e-05	3.43433e-05	0	2.04026e-06	2.63985e-06	0	0	0	0	0	0	0	Bacteria; Proteobacteria; Alphaproteobacteria; Rhodospirillales; Rhodospirillaceae; uncultured; uncultured bacterium
FJ487483,1,1372	0.000111778	3.48162e-05	9.68985e-05	3.06637e-05	0	1.42818e-05	3.95978e-06	0	0	0	0	0	0	0	Archaea; Thaumarchaeota; Marine Group I; Unknown Order; Unknown Family; Candidatus Nitrosopumilus
EU686591,19472,20966	4.55937e-05	0.000112361	5.56888e-05	7.60459e-05	0	1.02013e-06	1.31993e-06	0	0	0	0	0	0	0	Bacteria; Proteobacteria; Deltaproteobacteria; Bdellovibrionales; Bdellovibrionaceae; OM27 clade; uncultured bacterium
New,CleanUp,ReferenceOTU242846	7.94213e-05	8.22928e-05	7.68505e-05	4.78353e-05	0	1.02013e-06	3.95978e-06	0	0	0	0	0	0	0	Bacteria; Chloroflexi; SAR202 clade
New,CleanUp,ReferenceOTU800279	2.5003e-05	0.000208897	2.78444e-05	2.94371e-05	0	0	0	0	0	0	0	0	0	0	Bacteria; Planctomycetes; Phycisphaerae; Phycisphaerales; Phycisphaeraceae; Phycisphaera; uncultured bacterium
GU108550,1,1391	2.05907e-05	0	2.22755e-06	1.22655e-06	0	0.000196885	6.99561e-05	0	0	0	0	0	0	0	Bacteria; Proteobacteria; Gammaproteobacteria; Pseudomonadales; Pseudomonadaceae; Pseudomonas; uncultured bacterium
New,ReferenceOTU996	8.38336e-05	0.000115526	5.4575e-05	3.67964e-05	0	0	0	0	0	0	0	0	0	0	Bacteria; Planctomycetes; Phycisphaerae; Phycisphaerales; Phycisphaeraceae; Phycisphaera; uncultured organism
AY726926,1,1207	7.35383e-05	7.59626e-05	6.79403e-05	7.11397e-05	0	1.02013e-06	0	0	0	0	0	0	0	0	Bacteria; Proteobacteria; Deltaproteobacteria; SAR324 clade(Marine group B); uncultured bacterium; uncultured bacterium; uncultured bacterium
New,CleanUp,ReferenceOTU669964	3.97107e-05	3.48162e-05	0.000183773	1.96248e-05	0	1.02013e-05	1.31993e-06	0	0	0	0	0	0	0	Unassigned
New,CleanUp,ReferenceOTU181679	0.00013384	8.22928e-05	0	6.99132e-05	0	3.06038e-06	0	0	0	0	0	0	0	0	Bacteria; Proteobacteria; Alphaproteobacteria; Rhodobacterales; Rhodobacteraceae; uncultured; uncultured bacterium
HQ672998,1,1425	4.26522e-05	0.000126604	9.24434e-05	2.6984e-05	0	0	0	0	0	0	0	0	0	0	Bacteria; BD1-5; uncultured bacterium; uncultured bacterium; uncultured bacterium; uncultured bacterium; uncultured bacterium
New,ReferenceOTU1874	5.73599e-05	0.000118692	4.23235e-05	6.99132e-05	0	0	0	0	0	0	0	0	0	0	Bacteria; Chloroflexi; SAR202 clade
DQ396333,1,1529	7.05967e-05	0.000156673	3.4527e-05	2.33044e-05	0	3.06038e-06	0	0	0	0	0	0	0	0	Bacteria; Proteobacteria; Gammaproteobacteria; Oceanospirillales; Halomonadaceae; Halomonas; uncultured organism
JN233145,1,1442	0.00011472	8.54579e-05	5.56888e-05	2.94371e-05	0	2.04026e-06	0	0	0	0	0	0	0	0	Bacteria; Actinobacteria; Acidimicrobiia; Acidimicrobiales; Sva0996 marine group; uncultured actinobacterium; uncultured actinobacterium
FJ481371,1,1402	6.76552e-05	9.17881e-05	9.9126e-05	2.82106e-05	0	0	0	0	0	0	0	0	0	0	Bacteria; Chloroflexi; SAR202 clade; uncultured Chloroflexus sp,; uncultured Chloroflexus sp,; uncultured Chloroflexus sp,; uncultured Chloroflexus sp,
AB694206,1,1396	8.38336e-05	9.33707e-05	5.4575e-05	5.39681e-05	0	1.02013e-06	0	0	0	0	0	0	0	0	Bacteria; Acidobacteria; Acidobacteria; Subgroup 21; uncultured bacterium; uncultured bacterium; uncultured bacterium
New,CleanUp,ReferenceOTU961184	1.61784e-05	0.000137682	8.46469e-05	3.18902e-05	0	1.63221e-05	0	0	0	0	0	0	0	0	Bacteria; Planctomycetes; Planctomycetacia; Planctomycetales; Planctomycetaceae; Rhodopirellula; uncultured bacterium
New,ReferenceOTU1202	4.85353e-05	0.000110779	4.90061e-05	7.60459e-05	0	2.04026e-06	0	0	0	0	0	0	0	0	Bacteria; Chloroflexi; SAR202 clade
New,CleanUp,ReferenceOTU494386	2.64738e-05	0.000200984	2.45031e-05	3.31168e-05	0	1.02013e-06	0	0	0	0	0	0	0	0	Bacteria; Proteobacteria; Deltaproteobacteria; Sh765B-TzT-29
GU474874,407,1850	2.94153e-05	0.000174081	4.78923e-05	2.94371e-05	0	3.06038e-06	1.31993e-06	0	0	0	0	0	0	0	Bacteria; Bacteroidetes; Flavobacteriia; Flavobacteriales; NS9 marine group; uncultured bacterium; uncultured bacterium
JQ062710,1,1491	0.000142664	8.38754e-05	5.56888e-06	4.90619e-05	0	2.04026e-06	1.31993e-06	0	0	0	0	0	0	0	Bacteria; Bacteroidetes; Flavobacteriia; Flavobacteriales; Flavobacteriaceae; NS4 marine group; uncultured bacterium
New,CleanUp,ReferenceOTU1114324	6.61845e-05	0.000145595	2.11617e-05	4.53822e-05	0	6.12077e-06	0	0	0	0	0	0	0	0	Bacteria; Chloroflexi; SAR202 clade
HQ674599,1,1508	0.000123544	3.79813e-05	7.57367e-05	4.66088e-05	0	0	0	0	0	0	0	0	0	0	Bacteria; Proteobacteria; Deltaproteobacteria; Desulfuromonadales; GR-WP33-58; uncultured bacterium; uncultured bacterium
New,CleanUp,ReferenceOTU722776	3.38276e-05	0.000151925	3.56408e-05	5.76477e-05	0	2.04026e-06	2.63985e-06	0	0	0	0	0	0	0	Bacteria; Acidobacteria; Acidobacteria; Subgroup 6
New,CleanUp,ReferenceOTU682555	9.11875e-05	9.65358e-05	3.89821e-05	5.1515e-05	0	0	3.95978e-06	0	0	0	0	0	0	0	Bacteria; Proteobacteria; Alphaproteobacteria; Rhodospirillales; AT-s3-44; uncultured alpha proteobacterium; uncultured alpha proteobacterium
New,ReferenceOTU210	8.97167e-05	7.59626e-05	6.12577e-05	5.1515e-05	0	3.06038e-06	0	0	0	0	0	0	0	0	Unassigned
JN166337,1,1461	7.20675e-05	9.65358e-05	3.78684e-05	7.48194e-05	0	0	0	0	0	0	0	0	0	0	Bacteria; Chloroflexi; SAR202 clade; uncultured marine microorganism; uncultured marine microorganism; uncultured marine microorganism; uncultured marine microorganism
New,CleanUp,ReferenceOTU642688	2.79445e-05	0.000132935	2.11617e-05	9.68972e-05	0	0	1.31993e-06	0	0	0	0	0	0	0	Bacteria; Proteobacteria; Deltaproteobacteria; Desulfobacterales; Nitrospinaceae; Nitrospina; uncultured bacterium
HQ242598,1,1472	7.35383e-05	0.000106031	5.34612e-05	4.29291e-05	0	4.08051e-06	0	0	0	0	0	0	0	0	Bacteria; Proteobacteria; Gammaproteobacteria; Thiotrichales; Thiotrichales Incertae Sedis; Candidatus Endoecteinascidia
New,ReferenceOTU1606	5.73599e-05	9.33707e-05	8.13056e-05	3.92495e-05	0	2.04026e-06	3.95978e-06	0	0	0	0	0	0	0	Bacteria; Chloroflexi; SAR202 clade; uncultured bacterium; uncultured bacterium; uncultured bacterium; uncultured bacterium
FJ826342,1,1445	0.000105895	0.000110779	4.4551e-06	5.39681e-05	0	2.04026e-06	0	0	0	0	0	0	0	0	Bacteria; Cyanobacteria; Chloroplast; uncultured bacterium; uncultured bacterium; uncultured bacterium; uncultured bacterium
New,ReferenceOTU1321	9.4129e-05	2.21558e-05	0.000111378	4.90619e-05	0	0	0	0	0	0	0	0	0	0	Bacteria; Proteobacteria; Gammaproteobacteria; Alteromonadales; Idiomarinaceae; Idiomarina
New,CleanUp,ReferenceOTU755469	5.44183e-05	0.000110779	5.4575e-05	5.64212e-05	0	0	0	0	0	0	0	0	0	0	Unassigned
HQ673692,1,1447	6.32429e-05	0.000106031	4.67786e-05	5.64212e-05	0	2.04026e-06	1.31993e-06	0	0	0	0	0	0	0	Bacteria; Proteobacteria; Alphaproteobacteria; SAR11 clade
New,CleanUp,ReferenceOTU819283	0.000119132	1.10779e-05	0.000114719	2.82106e-05	0	2.04026e-06	0	0	0	0	0	0	0	0	Unassigned
GQ349281,1,1395	9.11875e-05	8.54579e-05	5.79163e-05	4.0476e-05	0	0	0	0	0	0	0	0	0	0	Bacteria; Proteobacteria; Deltaproteobacteria; Bdellovibrionales; Bacteriovoracaceae; uncultured
New,CleanUp,ReferenceOTU914776	4.4123e-06	0.000167751	5.56888e-06	9.32176e-05	0	0	3.95978e-06	0	0	0	0	0	0	0	Bacteria; Planctomycetes; Pla3 lineage; uncultured bacterium; uncultured bacterium; uncultured bacterium; uncultured bacterium
HQ672866,1,1499	7.79506e-05	0.000125022	2.33893e-05	4.66088e-05	0	0	1.31993e-06	0	0	0	0	0	0	0	Bacteria; Proteobacteria; Deltaproteobacteria; Myxococcales; uncultured; uncultured bacterium; uncultured bacterium
New,CleanUp,ReferenceOTU360891	6.61845e-05	7.27975e-05	8.79883e-05	4.29291e-05	0	0	3.95978e-06	0	0	0	0	0	0	0	Bacteria; Planctomycetes; Planctomycetacia; Planctomycetales; Planctomycetaceae; Planctomyces; uncultured bacterium
New,CleanUp,ReferenceOTU330895	8.67752e-05	9.49532e-05	4.4551e-05	4.66088e-05	0	0	0	0	0	0	0	0	0	0	Bacteria; Chloroflexi; SAR202 clade
JX526853,1,1379	9.11875e-05	0.000113944	0	4.78353e-05	0	1.73422e-05	1.31993e-06	0	0	0	0	0	0	0	Bacteria; Proteobacteria; Alphaproteobacteria; SAR11 clade; Surface 1; uncultured bacterium; uncultured bacterium
New,CleanUp,ReferenceOTU298353	7.94213e-05	9.65358e-05	4.12097e-05	5.1515e-05	0	1.02013e-06	1.31993e-06	0	0	0	0	0	0	0	Bacteria; Proteobacteria; Alphaproteobacteria; SAR11 clade; Deep 1
New,ReferenceOTU2381	3.52984e-05	0.000158255	7.79643e-06	6.86866e-05	0	0	0	0	0	0	0	0	0	0	Unassigned
New,CleanUp,ReferenceOTU1109515	4.55937e-05	0.000123439	3.34133e-05	6.74601e-05	0	0	0	0	0	0	0	0	0	0	Bacteria; Chloroflexi; SAR202 clade
New,CleanUp,ReferenceOTU912440	4.4123e-06	0.000156673	1.55929e-05	9.32176e-05	0	0	0	0	0	0	0	0	0	0	Bacteria; Verrucomicrobia; Arctic97B-4 marine group
New,ReferenceOTU1560	0	0.000243713	0	2.57575e-05	0	0	0	0	0	0	0	0	0	0	Bacteria; Acidobacteria; Acidobacteria; Subgroup 6; uncultured bacterium; uncultured bacterium; uncultured bacterium
New,CleanUp,ReferenceOTU562326	7.94213e-05	0.000120274	4.34372e-05	2.20778e-05	0	0	3.95978e-06	0	0	0	0	0	0	0	Bacteria; Proteobacteria; Alphaproteobacteria; Rhodospirillales
New,CleanUp,ReferenceOTU527468	9.55998e-05	6.33022e-05	8.68745e-05	2.33044e-05	0	0	0	0	0	0	0	0	0	0	Bacteria; Verrucomicrobia; Arctic97B-4 marine group; uncultured bacterium; uncultured bacterium; uncultured bacterium; uncultured bacterium
New,CleanUp,ReferenceOTU279035	9.11875e-05	4.90592e-05	5.90301e-05	6.25539e-05	0	4.08051e-06	2.63985e-06	0	0	0	0	0	0	0	Bacteria; Chloroflexi; SAR202 clade; uncultured bacterium; uncultured bacterium; uncultured bacterium; uncultured bacterium
New,CleanUp,ReferenceOTU844679	0	3.16511e-06	3.34133e-06	0	0	3.87649e-05	0.000223068	0	0	0	0	0	0	0	Bacteria; BD1-5; uncultured bacterium; uncultured bacterium; uncultured bacterium; uncultured bacterium; uncultured bacterium
New,CleanUp,ReferenceOTU1013096	0.00011472	4.74766e-06	9.02158e-05	4.29291e-05	0	1.53019e-05	0	0	0	0	0	0	0	0	Bacteria; Proteobacteria; Gammaproteobacteria; Oceanospirillales; Halomonadaceae; Halomonas
New,ReferenceOTU1646	6.61845e-05	0.000102866	3.11857e-05	6.5007e-05	0	1.02013e-06	0	0	0	0	0	0	0	0	Bacteria; Chloroflexi; SAR202 clade
New,CleanUp,ReferenceOTU819353	0.00011619	3.16511e-05	7.68505e-05	3.67964e-05	0	2.04026e-06	1.31993e-06	0	0	0	0	0	0	0	Bacteria; Chloroflexi; SAR202 clade
JN874184,1,1459	8.67752e-05	6.64673e-05	4.34372e-05	6.25539e-05	0	4.08051e-06	1.31993e-06	0	0	0	0	0	0	0	Bacteria; Planctomycetes; Phycisphaerae; Phycisphaerales; Phycisphaeraceae; FS140-16B-02 marine group
New,CleanUp,ReferenceOTU1099333	0.000104424	6.48847e-05	6.01439e-05	3.06637e-05	0	4.08051e-06	0	0	0	0	0	0	0	0	Unassigned
HM799142,1,900	6.32429e-05	6.0137e-05	7.90781e-05	5.27415e-05	0	7.1409e-06	1.31993e-06	0	0	0	0	0	0	0	Archaea; Thaumarchaeota; Marine Group I; uncultured marine group I thaumarchaeote; uncultured marine group I thaumarchaeote; uncultured marine group I thaumarchaeote; uncultured marine group I thaumarchaeote
New,CleanUp,ReferenceOTU836889	9.85413e-05	4.2729e-05	8.57607e-05	3.55699e-05	0	1.02013e-06	0	0	0	0	0	0	0	0	Bacteria; Spirochaetae; Spirochaetes; Spirochaetales; Spirochaetaceae; Spirochaeta
JQ612353,1,1484	5.14768e-05	0.00014876	3.78684e-05	2.33044e-05	0	0	1.31993e-06	0	0	0	0	0	0	0	Bacteria; Acidobacteria; Acidobacteria; Subgroup 3; PAUC26f; uncultured Acidobacteria bacterium; uncultured Acidobacteria bacterium
New,CleanUp,ReferenceOTU798328	6.76552e-05	9.65358e-05	4.67786e-05	4.78353e-05	0	1.02013e-06	2.63985e-06	0	0	0	0	0	0	0	Bacteria; Acidobacteria; Acidobacteria; Subgroup 6; uncultured bacterium; uncultured bacterium; uncultured bacterium
New,CleanUp,ReferenceOTU924935	7.35383e-06	0.000172498	1.0024e-05	6.99132e-05	0	0	2.63985e-06	0	0	0	0	0	0	0	Bacteria; Acidobacteria; Acidobacteria; Subgroup 6; uncultured bacterium; uncultured bacterium; uncultured bacterium
New,ReferenceOTU449	7.35383e-06	0.000161421	2.22755e-06	8.70848e-05	0	0	3.95978e-06	0	0	0	0	0	0	0	Bacteria; Acidobacteria; Acidobacteria; Subgroup 6; uncultured bacterium; uncultured bacterium; uncultured bacterium
New,ReferenceOTU2293	6.17722e-05	0.000118692	4.00959e-05	3.8023e-05	0	2.04026e-06	0	0	0	0	0	0	0	0	Bacteria; Proteobacteria; Gammaproteobacteria; KI89A clade; uncultured bacterium; uncultured bacterium; uncultured bacterium
New,CleanUp,ReferenceOTU778893	8.38336e-05	9.17881e-05	7.68505e-05	6.13273e-06	0	0	0	0	0	0	0	0	0	0	Bacteria; Proteobacteria; Gammaproteobacteria; Oceanospirillales; Halomonadaceae; Halomonas; uncultured organism
HQ163429,1,1354	1.02954e-05	0.00015509	1.33653e-05	7.97255e-05	0	0	0	0	0	0	0	0	0	0	Bacteria; Proteobacteria; Deltaproteobacteria; Desulfobacterales; Nitrospinaceae; Nitrospina; uncultured bacterium
JX227409,1,1490	7.5009e-05	6.96324e-05	9.24434e-05	1.71717e-05	0	3.06038e-06	0	0	0	0	0	0	0	0	Bacteria; Acidobacteria; Acidobacteria; Subgroup 9; uncultured bacterium; uncultured bacterium; uncultured bacterium
HQ673826,1,1508	7.79506e-05	6.17196e-05	6.23714e-05	5.39681e-05	0	1.02013e-06	0	0	0	0	0	0	0	0	Bacteria; Deferribacteres; Deferribacteres; Deferribacterales; SAR406 clade(Marine group A); uncultured bacterium; uncultured bacterium
JN985986,1,1465	0.000101483	5.85545e-05	1.22515e-05	8.34052e-05	0	0	0	0	0	0	0	0	0	0	Bacteria; Proteobacteria; Alphaproteobacteria; Rickettsiales; S25-593; uncultured bacterium; uncultured bacterium
New,CleanUp,ReferenceOTU499877	3.97107e-05	0.000110779	3.67546e-05	6.62335e-05	0	0	1.31993e-06	0	0	0	0	0	0	0	Bacteria; Proteobacteria; Alphaproteobacteria; Rhodospirillales; Rhodospirillaceae; AEGEAN-169 marine group; uncultured bacterium
AB694424,1,1392	0.000101483	4.2729e-05	7.12816e-05	3.31168e-05	0	6.12077e-06	0	0	0	0	0	0	0	0	Bacteria; Chloroflexi; S085; uncultured bacterium; uncultured bacterium; uncultured bacterium; uncultured bacterium
New,CleanUp,ReferenceOTU244581	0	1.58255e-06	0	7.35928e-06	0	0.000130576	0.000114834	0	0	0	0	0	0	0	Bacteria; Proteobacteria; Gammaproteobacteria; Thiotrichales; Thiotrichaceae; uncultured; uncultured bacterium
AB013825,1,1526	0.000104424	3.16511e-05	8.9102e-06	7.35928e-06	0	9.79323e-05	3.95978e-06	0	0	0	0	0	0	0	Bacteria; Proteobacteria; Gammaproteobacteria; Alteromonadales; NB-1d; uncultured gamma proteobacterium; uncultured gamma proteobacterium
AM997488,1,1481	3.23568e-05	0.000107614	4.67786e-05	6.25539e-05	0	2.04026e-06	2.63985e-06	0	0	0	0	0	0	0	Bacteria; Chloroflexi; SAR202 clade
HQ674219,1,1452	4.70645e-05	8.22928e-05	2.67306e-05	9.1991e-05	0	0	5.27971e-06	0	0	0	0	0	0	0	Bacteria; Proteobacteria; Alphaproteobacteria; SAR11 clade; Deep 1; uncultured bacterium; uncultured bacterium
EF575035,1,1498	6.47137e-05	0.000109196	0	7.23663e-05	0	1.02013e-06	3.95978e-06	0	0	0	0	0	0	0	Bacteria; Proteobacteria; Gammaproteobacteria; Oceanospirillales; SAR86 clade; uncultured bacterium; uncultured bacterium
New,CleanUp,ReferenceOTU129286	6.03014e-05	5.69719e-05	8.46469e-05	4.17026e-05	0	1.02013e-06	6.59963e-06	0	0	0	0	0	0	0	Bacteria; Chloroflexi; SAR202 clade
New,CleanUp,ReferenceOTU211958	8.53044e-05	5.38068e-05	7.12816e-05	2.94371e-05	0	2.04026e-06	9.23948e-06	0	0	0	0	0	0	0	Bacteria; Chloroflexi; SAR202 clade; uncultured bacterium; uncultured bacterium; uncultured bacterium; uncultured bacterium
New,CleanUp,ReferenceOTU620451	7.5009e-05	8.07103e-05	3.34133e-05	6.13273e-05	0	0	0	0	0	0	0	0	0	0	Bacteria; Chloroflexi; SAR202 clade; uncultured Chloroflexus sp,; uncultured Chloroflexus sp,; uncultured Chloroflexus sp,; uncultured Chloroflexus sp,
New,CleanUp,ReferenceOTU593468	5.58891e-05	5.53894e-05	6.68265e-05	7.11397e-05	0	1.02013e-06	0	0	0	0	0	0	0	0	Bacteria; Chloroflexi; SAR202 clade
New,CleanUp,ReferenceOTU676836	5.14768e-05	6.64673e-05	0.000128084	0	0	4.08051e-06	0	0	0	0	0	0	0	0	Bacteria; Proteobacteria; Gammaproteobacteria; Oceanospirillales; Halomonadaceae; Halomonas
New,CleanUp,ReferenceOTU401937	0.000102954	7.91277e-05	5.56888e-05	1.22655e-05	0	0	0	0	0	0	0	0	0	0	Bacteria; Proteobacteria; Gammaproteobacteria; Oceanospirillales; Halomonadaceae; Halomonas
New,CleanUp,ReferenceOTU328464	5.58891e-05	0.000112361	3.4527e-05	4.0476e-05	0	4.08051e-06	1.31993e-06	0	0	0	0	0	0	0	Bacteria; Chloroflexi; SAR202 clade; uncultured bacterium; uncultured bacterium; uncultured bacterium; uncultured bacterium
New,CleanUp,ReferenceOTU707322	4.55937e-05	9.81183e-05	5.4575e-05	5.02884e-05	0	0	0	0	0	0	0	0	0	0	Bacteria; Proteobacteria; Gammaproteobacteria; Acidithiobacillales; KCM-B-112; uncultured Chromatiales bacterium; uncultured Chromatiales bacterium
New,CleanUp,ReferenceOTU325543	5.0006e-05	4.74766e-06	0.000175977	7.35928e-06	0	9.18115e-06	0	0	0	0	0	0	0	0	Unassigned
New,CleanUp,ReferenceOTU974368	5.44183e-05	6.80498e-05	8.9102e-05	3.55699e-05	0	0	0	0	0	0	0	0	0	0	Bacteria; Chloroflexi; SAR202 clade; uncultured bacterium; uncultured bacterium; uncultured bacterium; uncultured bacterium
New,CleanUp,ReferenceOTU240794	5.14768e-05	0.000107614	3.56408e-05	4.90619e-05	0	3.06038e-06	0	0	0	0	0	0	0	0	Bacteria; Bacteroidetes; Cytophagia; Cytophagales; Flammeovirgaceae; uncultured; uncultured bacterium
New,CleanUp,ReferenceOTU67276	0.000113249	6.17196e-05	4.67786e-05	1.96248e-05	0	5.10064e-06	0	0	0	0	0	0	0	0	Bacteria; Proteobacteria; Deltaproteobacteria; Desulfuromonadales; GR-WP33-58
New,CleanUp,ReferenceOTU996563	5.14768e-05	0.00015509	4.4551e-06	3.18902e-05	0	0	2.63985e-06	0	0	0	0	0	0	0	Bacteria; Proteobacteria; Alphaproteobacteria; Sneathiellales; Sneathiellaceae; uncultured
New,ReferenceOTU1814	3.38276e-05	8.54579e-05	5.56888e-05	6.74601e-05	0	0	2.63985e-06	0	0	0	0	0	0	0	Bacteria; Acidobacteria; Acidobacteria; Subgroup 6; uncultured bacterium; uncultured bacterium; uncultured bacterium
New,CleanUp,ReferenceOTU93191	0.00011472	7.91277e-06	6.4599e-05	5.1515e-05	0	6.12077e-06	0	0	0	0	0	0	0	0	Unassigned
New,CleanUp,ReferenceOTU893882	6.17722e-05	8.22928e-05	2.67306e-05	7.35928e-05	0	0	0	0	0	0	0	0	0	0	Bacteria; Proteobacteria; Deltaproteobacteria; Myxococcales; 0319-6G20; uncultured bacterium; uncultured bacterium
New,CleanUp,ReferenceOTU688639	5.73599e-05	5.53894e-05	7.12816e-05	5.76477e-05	0	0	2.63985e-06	0	0	0	0	0	0	0	Bacteria; Chloroflexi; SAR202 clade; uncultured bacterium; uncultured bacterium; uncultured bacterium; uncultured bacterium
New,CleanUp,ReferenceOTU111661	7.79506e-05	6.96324e-05	6.57128e-05	3.06637e-05	0	0	0	0	0	0	0	0	0	0	Bacteria; Chloroflexi; TK10; uncultured bacterium; uncultured bacterium; uncultured bacterium; uncultured bacterium
New,CleanUp,ReferenceOTU11391	7.79506e-05	7.91277e-05	5.12337e-05	2.82106e-05	0	3.06038e-06	3.95978e-06	0	0	0	0	0	0	0	Bacteria; Proteobacteria; Alphaproteobacteria; SAR11 clade; Deep 1
KF859677,1,1493	4.85353e-05	0.000110779	3.4527e-05	4.53822e-05	0	3.06038e-06	0	0	0	0	0	0	0	0	Bacteria; Proteobacteria; Gammaproteobacteria; Oceanospirillales; Halomonadaceae; Halomonas; uncultured Halomonas sp,
New,CleanUp,ReferenceOTU1084863	4.70645e-05	0.000117109	4.4551e-05	3.18902e-05	0	1.02013e-06	0	0	0	0	0	0	0	0	Bacteria; Proteobacteria; Deltaproteobacteria; Desulfobacterales; Nitrospinaceae; uncultured; uncultured bacterium
New,CleanUp,ReferenceOTU981198	1.76492e-05	0.000178829	3.34133e-06	4.17026e-05	0	0	0	0	0	0	0	0	0	0	Bacteria; Acidobacteria; Acidobacteria; Subgroup 6; uncultured Acidobacteria bacterium; uncultured Acidobacteria bacterium; uncultured Acidobacteria bacterium
GQ350506,1,1340	6.47137e-05	8.38754e-05	5.56888e-05	3.18902e-05	0	4.08051e-06	0	0	0	0	0	0	0	0	Bacteria; Proteobacteria; Alphaproteobacteria; Rhodospirillales; Rhodospirillaceae; Defluviicoccus; uncultured bacterium
New,CleanUp,ReferenceOTU108575	6.61845e-05	7.438e-05	4.78923e-05	4.90619e-05	0	0	0	0	0	0	0	0	0	0	Bacteria; Chloroflexi; SAR202 clade
New,CleanUp,ReferenceOTU916556	8.08921e-05	6.0137e-05	5.34612e-05	4.29291e-05	0	0	0	0	0	0	0	0	0	0	Bacteria; Chloroflexi; SAR202 clade; uncultured bacterium; uncultured bacterium; uncultured bacterium; uncultured bacterium
HQ597864,1,1508	3.08861e-05	9.81183e-05	3.11857e-05	7.60459e-05	0	0	0	0	0	0	0	0	0	0	Bacteria; Acidobacteria; Acidobacteria; Subgroup 6; uncultured bacterium; uncultured bacterium; uncultured bacterium
KC003246,1,1360	0.000101483	4.11464e-05	2.45031e-05	6.62335e-05	0	0	2.63985e-06	0	0	0	0	0	0	0	Bacteria; Proteobacteria; Alphaproteobacteria; Rhodospirillales; Rhodospirillaceae; Defluviicoccus; unidentified marine bacterioplankton
JX227425,1,1461	5.29476e-05	5.69719e-05	8.24194e-05	3.92495e-05	0	4.08051e-06	0	0	0	0	0	0	0	0	Bacteria; Chloroflexi; SAR202 clade; uncultured bacterium; uncultured bacterium; uncultured bacterium; uncultured bacterium
AB260042,1,1370	2.94153e-06	0	0	0	0	0	0.000232307	0	0	0	0	0	0	0	Archaea; Euryarchaeota; Methanococci; Methanococcales; Methanococcaceae; Methanothermococcus
New,CleanUp,ReferenceOTU480794	8.23629e-05	6.17196e-05	7.57367e-05	1.10389e-05	0	0	3.95978e-06	0	0	0	0	0	0	0	Bacteria; Chloroflexi; SAR202 clade
New,CleanUp,ReferenceOTU428452	0	0.000166168	3.34133e-06	6.13273e-05	0	0	3.95978e-06	0	0	0	0	0	0	0	Unassigned
New,CleanUp,ReferenceOTU214915	5.73599e-05	9.65358e-05	4.90061e-05	2.6984e-05	0	2.04026e-06	2.63985e-06	0	0	0	0	0	0	0	Bacteria; Planctomycetes; Phycisphaerae; Phycisphaerales; Phycisphaeraceae; FS140-16B-02 marine group
New,ReferenceOTU2326	8.23629e-05	1.4243e-05	0.000115833	2.08513e-05	0	1.02013e-06	0	0	0	0	0	0	0	0	Bacteria; Proteobacteria; Gammaproteobacteria; Alteromonadales; Idiomarinaceae; Idiomarina
New,ReferenceOTU538	6.76552e-05	5.06417e-05	8.9102e-05	2.57575e-05	0	1.02013e-06	0	0	0	0	0	0	0	0	Bacteria; Chloroflexi; SAR202 clade
HQ673407,1,1390	5.44183e-05	9.17881e-05	4.12097e-05	4.66088e-05	0	0	0	0	0	0	0	0	0	0	Bacteria; Proteobacteria; Alphaproteobacteria; SAR11 clade; Deep 1; uncultured bacterium; uncultured bacterium
New,CleanUp,ReferenceOTU313239	7.94213e-05	6.64673e-05	7.68505e-05	8.58583e-06	0	2.04026e-06	0	0	0	0	0	0	0	0	Bacteria; Proteobacteria; Alphaproteobacteria; SAR11 clade; Surface 1
FM882228,1,1386	3.38276e-05	0	0.000152587	4.17026e-05	0	5.10064e-06	0	0	0	0	0	0	0	0	Bacteria; Bacteroidetes; Flavobacteriia; Flavobacteriales; Flavobacteriaceae; Mesonia
New,CleanUp,ReferenceOTU790165	4.4123e-06	0	3.34133e-06	0	0	0.000104053	0.000120113	0	0	0	0	0	0	0	Bacteria; Proteobacteria; Gammaproteobacteria; Oceanospirillales; SUP05 cluster
HQ673820,1,1519	9.11875e-05	3.48162e-05	6.01439e-05	4.53822e-05	0	0	0	0	0	0	0	0	0	0	Bacteria; Deferribacteres; Deferribacteres; Deferribacterales; SAR406 clade(Marine group A); uncultured bacterium; uncultured bacterium
GQ008625,1,1308	0.000229439	0	0	0	0	2.04026e-06	0	0	0	0	0	0	0	0	Bacteria; Proteobacteria; Alphaproteobacteria; Rhizobiales; Methylobacteriaceae; Methylobacterium
New,CleanUp,ReferenceOTU764505	0	1.58255e-06	0	0	0	9.18115e-06	0.000220428	0	0	0	0	0	0	0	Bacteria; Candidate division OD1; uncultured bacterium; uncultured bacterium; uncultured bacterium; uncultured bacterium; uncultured bacterium
EU795194,26094,27645	5.44183e-05	7.27975e-05	5.4575e-05	3.8023e-05	0	8.16103e-06	2.63985e-06	0	0	0	0	0	0	0	Bacteria; Planctomycetes; Planctomycetacia; Planctomycetales; Planctomycetaceae; Planctomyces; uncultured bacterium
New,CleanUp,ReferenceOTU1069533	8.08921e-05	7.75451e-05	4.90061e-05	1.83982e-05	0	0	3.95978e-06	0	0	0	0	0	0	0	Bacteria; Verrucomicrobia; Opitutae; Opitutales; Opitutaceae; Diplosphaera
New,ReferenceOTU1597	8.53044e-05	6.80498e-05	3.56408e-05	3.8023e-05	0	0	2.63985e-06	0	0	0	0	0	0	0	Bacteria; Chloroflexi; SAR202 clade
HF912758,1,1454	5.88306e-05	9.49532e-05	4.4551e-05	2.82106e-05	0	3.06038e-06	0	0	0	0	0	0	0	0	Bacteria; Chloroflexi; SAR202 clade; uncultured bacterium; uncultured bacterium; uncultured bacterium; uncultured bacterium
New,CleanUp,ReferenceOTU310247	0	0.000169333	1.33653e-05	4.66088e-05	0	0	0	0	0	0	0	0	0	0	Bacteria; Proteobacteria; Gammaproteobacteria; Legionellales; Coxiellaceae; Coxiella
New,CleanUp,ReferenceOTU250145	9.55998e-05	6.80498e-05	5.79163e-05	6.13273e-06	0	1.02013e-06	0	0	0	0	0	0	0	0	Unassigned
New,CleanUp,ReferenceOTU956504	7.35383e-05	6.64673e-05	3.89821e-05	4.29291e-05	0	4.08051e-06	2.63985e-06	0	0	0	0	0	0	0	Bacteria; Chloroflexi; SAR202 clade; uncultured bacterium; uncultured bacterium; uncultured bacterium; uncultured bacterium
New,CleanUp,ReferenceOTU515024	0	0.000170916	2.22755e-06	5.51946e-05	0	0	0	0	0	0	0	0	0	0	Bacteria; Acidobacteria; Acidobacteria; Subgroup 6
New,CleanUp,ReferenceOTU232020	2.94153e-05	0.000151925	2.11617e-05	2.57575e-05	0	0	0	0	0	0	0	0	0	0	Bacteria; Proteobacteria; Gammaproteobacteria; KI89A clade; uncultured bacterium; uncultured bacterium; uncultured bacterium
New,CleanUp,ReferenceOTU690043	5.73599e-05	0	0.000165953	4.90619e-06	0	0	0	0	0	0	0	0	0	0	Bacteria; Proteobacteria; Gammaproteobacteria; Alteromonadales; Alteromonadaceae; Marinobacter; uncultured bacterium
JF809735,1,1434	8.82459e-06	0.000115526	4.12097e-05	6.13273e-05	0	0	1.31993e-06	0	0	0	0	0	0	0	Bacteria; Verrucomicrobia; Opitutae; RS-B22; uncultured bacterium; uncultured bacterium; uncultured bacterium
New,CleanUp,ReferenceOTU190941	0	0.000185159	1.11378e-06	3.92495e-05	0	0	2.63985e-06	0	0	0	0	0	0	0	Bacteria; Acidobacteria; Acidobacteria; Subgroup 13; uncultured bacterium; uncultured bacterium; uncultured bacterium
New,CleanUp,ReferenceOTU743599	7.79506e-05	3.63987e-05	8.24194e-05	2.6984e-05	0	0	3.95978e-06	0	0	0	0	0	0	0	Bacteria; Deferribacteres; Deferribacteres; Deferribacterales; SAR406 clade(Marine group A); uncultured bacterium; uncultured bacterium
New,CleanUp,ReferenceOTU18181	2.35322e-05	7.12149e-05	7.23954e-05	5.51946e-05	1.08473e-06	4.08051e-06	0	0	0	0	0	0	0	0	Bacteria; Candidate division BRC1; uncultured candidate division BRC1 bacterium; uncultured candidate division BRC1 bacterium; uncultured candidate division BRC1 bacterium; uncultured candidate division BRC1 bacterium; uncultured candidate division BRC1 bacterium
EU919775,1,1479	3.08861e-05	6.0137e-05	4.34372e-05	2.20778e-05	0	6.12077e-05	9.23948e-06	0	0	0	0	0	0	0	Bacteria; Lentisphaerae; Oligosphaeria; uncultured bacterium; uncultured bacterium; uncultured bacterium; uncultured bacterium
HQ674107,1,1513	1.47077e-06	0.000174081	1.11378e-06	5.02884e-05	0	0	0	0	0	0	0	0	0	0	Bacteria; Proteobacteria; Gammaproteobacteria; Oceanospirillales; Oceanospirillaceae; Pseudospirillum; uncultured bacterium
New,CleanUp,ReferenceOTU1121342	8.23629e-05	6.48847e-05	5.12337e-05	2.57575e-05	0	0	2.63985e-06	0	0	0	0	0	0	0	Bacteria; Planctomycetes; Phycisphaerae; Phycisphaerales; Phycisphaeraceae; Phycisphaera; uncultured bacterium
DQ396038,1,1519	8.08921e-05	4.90592e-05	5.01199e-05	4.41557e-05	0	0	2.63985e-06	0	0	0	0	0	0	0	Bacteria; Bacteroidetes; Cytophagia; Cytophagales; Flammeovirgaceae; Marinoscillum; uncultured bacterium
New,CleanUp,ReferenceOTU50318	0.000125015	2.69034e-05	6.12577e-05	1.22655e-05	0	0	1.31993e-06	0	0	0	0	0	0	0	Bacteria; Chloroflexi; SAR202 clade
EU800178,1,1367	4.4123e-05	0.000118692	0	6.25539e-05	0	0	1.31993e-06	0	0	0	0	0	0	0	Bacteria; Proteobacteria; Alphaproteobacteria; Rickettsiales; SAR116 clade; uncultured bacterium; uncultured bacterium
New,CleanUp,ReferenceOTU959836	2.05907e-05	0.000121857	2.22755e-05	5.76477e-05	0	4.08051e-06	0	0	0	0	0	0	0	0	Bacteria; Candidate division BRC1; uncultured organism; uncultured organism; uncultured organism; uncultured organism; uncultured organism
FJ745198,1,1365	0.000142664	4.11464e-05	4.4551e-06	2.82106e-05	0	8.16103e-06	1.31993e-06	0	0	0	0	0	0	0	Bacteria; Actinobacteria; Acidimicrobiia; Acidimicrobiales; OM1 clade; Candidatus Actinomarina; uncultured bacterium
New,ReferenceOTU1132	1.47077e-06	0	0	0	0	1.32617e-05	0.000211188	0	0	0	0	0	0	0	Unassigned
HQ674471,1,1528	1.02954e-05	0.000156673	2.33893e-05	3.43433e-05	0	1.02013e-06	0	0	0	0	0	0	0	0	Bacteria; Proteobacteria; Deltaproteobacteria; Sh765B-TzT-29; uncultured bacterium; uncultured bacterium; uncultured bacterium
New,ReferenceOTU435	6.9126e-05	0.000140847	1.0024e-05	3.67964e-06	0	2.04026e-06	0	0	0	0	0	0	0	0	Bacteria; Proteobacteria; Deltaproteobacteria; Sh765B-TzT-29; uncultured bacterium; uncultured bacterium; uncultured bacterium
New,CleanUp,ReferenceOTU191965	4.11814e-05	0	0.000179318	3.67964e-06	0	0	0	0	0	0	0	0	0	0	Unassigned
DQ270756,1,1437	5.44183e-05	0.000109196	2.89582e-05	3.06637e-05	0	0	0	0	0	0	0	0	0	0	Bacteria; Proteobacteria; Gammaproteobacteria; Oceanospirillales; Halomonadaceae; Halomonas
New,CleanUp,ReferenceOTU199579	9.26582e-05	5.69719e-05	4.12097e-05	3.18902e-05	0	0	0	0	0	0	0	0	0	0	Unassigned
EF572748,1,1452	7.5009e-05	7.91277e-05	1.11378e-06	6.01008e-05	0	2.04026e-06	5.27971e-06	0	0	0	0	0	0	0	Bacteria; Proteobacteria; Alphaproteobacteria; Rickettsiales; SAR116 clade
New,CleanUp,ReferenceOTU791699	2.05907e-05	0.000144012	2.45031e-05	2.94371e-05	0	4.08051e-06	0	0	0	0	0	0	0	0	Bacteria; Acidobacteria; Acidobacteria; Subgroup 3; PAUC26f; uncultured bacterium; uncultured bacterium
New,CleanUp,ReferenceOTU1113361	4.70645e-05	5.69719e-05	8.46469e-05	3.18902e-05	0	0	1.31993e-06	0	0	0	0	0	0	0	Bacteria; Acidobacteria; Acidobacteria; Subgroup 21; uncultured Acidobacterium sp,; uncultured Acidobacterium sp,; uncultured Acidobacterium sp,
New,CleanUp,ReferenceOTU664836	3.38276e-05	8.8623e-05	6.4599e-05	0	0	3.46844e-05	0	0	0	0	0	0	0	0	Bacteria; Proteobacteria; Gammaproteobacteria; Oceanospirillales; Halomonadaceae; Halomonas; uncultured Halomonas sp,
New,CleanUp,ReferenceOTU666047	4.11814e-05	9.81183e-05	4.56648e-05	3.55699e-05	0	1.02013e-06	0	0	0	0	0	0	0	0	Bacteria; Planctomycetes; Phycisphaerae; Phycisphaerales; Phycisphaeraceae; Phycisphaera; uncultured bacterium
HQ674368,1,1489	4.26522e-05	8.8623e-05	4.34372e-05	4.66088e-05	0	0	0	0	0	0	0	0	0	0	Bacteria; Acidobacteria; Acidobacteria; Subgroup 5; uncultured bacterium; uncultured bacterium; uncultured bacterium
New,CleanUp,ReferenceOTU957160	0.000138252	4.90592e-05	1.22515e-05	1.83982e-05	0	3.06038e-06	0	0	0	0	0	0	0	0	Bacteria; Chloroflexi; SAR202 clade; uncultured Chloroflexus sp,; uncultured Chloroflexus sp,; uncultured Chloroflexus sp,; uncultured Chloroflexus sp,
New,CleanUp,ReferenceOTU891265	5.73599e-05	9.65358e-05	1.89342e-05	3.55699e-05	0	3.06038e-06	9.23948e-06	0	0	0	0	0	0	0	Bacteria; Planctomycetes; MBMPE71; uncultured planctomycete; uncultured planctomycete; uncultured planctomycete; uncultured planctomycete
AB073566,1,1396	0.000219144	0	0	0	0	0	0	0	0	0	0	0	0	0	Bacteria; Bacteroidetes; Flavobacteriia; Flavobacteriales; Flavobacteriaceae; Muricauda
KC593296,1,1255	2.94153e-06	0	0	0	0	7.1409e-06	0.000208548	0	0	0	0	0	0	0	Bacteria; Bacteroidetes; Flavobacteriia; Flavobacteriales; Flavobacteriaceae; Polaribacter
AY704400,1,1527	2.64738e-05	0.000113944	2.22755e-05	5.51946e-05	0	0	0	0	0	0	0	0	0	0	Bacteria; Planctomycetes; Pla4 lineage; uncultured bacterium; uncultured bacterium; uncultured bacterium; uncultured bacterium
New,CleanUp,ReferenceOTU107611	5.14768e-05	9.17881e-05	4.00959e-05	3.43433e-05	0	0	0	0	0	0	0	0	0	0	Bacteria; Proteobacteria; Alphaproteobacteria; SAR11 clade
New,CleanUp,ReferenceOTU645383	2.94153e-06	0.000126604	1.89342e-05	6.13273e-05	0	7.1409e-06	0	0	0	0	0	0	0	0	Bacteria; Planctomycetes; Planctomycetacia; Planctomycetales; Planctomycetaceae; Planctomyces; uncultured bacterium
New,CleanUp,ReferenceOTU50536	2.05907e-05	0.000113944	3.78684e-05	4.41557e-05	0	0	0	0	0	0	0	0	0	0	Unassigned
EU802393,1,1433	7.35383e-05	7.27975e-05	1.78204e-05	5.02884e-05	0	0	1.31993e-06	0	0	0	0	0	0	0	Bacteria; Proteobacteria; Alphaproteobacteria; SAR11 clade; Surface 1
New,CleanUp,ReferenceOTU697769	0.00013531	1.74081e-05	4.67786e-05	1.3492e-05	0	0	2.63985e-06	0	0	0	0	0	0	0	Bacteria; Proteobacteria; Gammaproteobacteria; Oceanospirillales; SUP05 cluster; uncultured bacterium; uncultured bacterium
JX173517,1,1444	5.44183e-05	9.81183e-05	3.56408e-05	2.33044e-05	0	4.08051e-06	0	0	0	0	0	0	0	0	Bacteria; Proteobacteria; Gammaproteobacteria; Oceanospirillales; Halomonadaceae; Halomonas; uncultured Halomonas sp,
New,CleanUp,ReferenceOTU21207	6.17722e-05	3.95638e-05	5.01199e-05	6.25539e-05	0	1.02013e-06	0	0	0	0	0	0	0	0	Bacteria; Proteobacteria; Alphaproteobacteria; Rhodospirillales; Rhodospirillaceae; Defluviicoccus; uncultured bacterium
GQ346922,1,1389	7.5009e-05	6.0137e-05	4.78923e-05	3.06637e-05	0	1.02013e-06	0	0	0	0	0	0	0	0	Bacteria; Proteobacteria; Deltaproteobacteria; Myxococcales; uncultured; uncultured delta proteobacterium; uncultured delta proteobacterium
New,CleanUp,ReferenceOTU441098	0	0.000164586	3.34133e-06	4.66088e-05	0	0	0	0	0	0	0	0	0	0	Bacteria; Planctomycetes; Pla3 lineage; uncultured bacterium; uncultured bacterium; uncultured bacterium; uncultured bacterium
New,CleanUp,ReferenceOTU499637	2.5003e-05	9.33707e-05	3.22995e-05	6.37804e-05	0	0	0	0	0	0	0	0	0	0	Bacteria; Chloroflexi; SAR202 clade
New,CleanUp,ReferenceOTU212536	5.73599e-05	0.000104449	2.67306e-05	2.57575e-05	0	0	0	0	0	0	0	0	0	0	Unassigned
HG780360,1,1270	1.76492e-05	4.74766e-06	7.79643e-06	1.22655e-05	0	9.18115e-06	0.000162351	0	0	0	0	0	0	0	Bacteria; Proteobacteria; Gammaproteobacteria; Alteromonadales; Alteromonadaceae; Marinobacter; uncultured Marinobacter sp,
New,CleanUp,ReferenceOTU266891	1.47077e-06	0	0	0	0	0	0.000212508	0	0	0	0	0	0	0	Bacteria; Proteobacteria; Gammaproteobacteria; Oceanospirillales; ZD0405; uncultured bacterium; uncultured bacterium
AJUG01000001,1490903,1492402	7.35383e-06	0.000109196	2.22755e-06	1.3492e-05	0	2.14227e-05	5.93967e-05	0	0	0	0	0	0	0	Bacteria; Bacteroidetes; Flavobacteriia; Flavobacteriales; Flavobacteriaceae
DQ396069,1,1510	5.73599e-05	4.11464e-05	4.34372e-05	6.99132e-05	0	1.02013e-06	0	0	0	0	0	0	0	0	Bacteria; Proteobacteria; Deltaproteobacteria; SAR324 clade(Marine group B); uncultured bacterium; uncultured bacterium; uncultured bacterium
New,CleanUp,ReferenceOTU226092	6.32429e-05	7.438e-05	4.67786e-05	2.57575e-05	0	2.04026e-06	0	0	0	0	0	0	0	0	Bacteria; Chloroflexi; SAR202 clade; uncultured Chloroflexus sp,; uncultured Chloroflexus sp,; uncultured Chloroflexus sp,; uncultured Chloroflexus sp,
New,CleanUp,ReferenceOTU240634	9.4129e-05	6.0137e-05	2.33893e-05	3.43433e-05	0	0	0	0	0	0	0	0	0	0	Bacteria; Chloroflexi; SAR202 clade; uncultured bacterium; uncultured bacterium; uncultured bacterium; uncultured bacterium
New,CleanUp,ReferenceOTU364576	5.88306e-05	9.33707e-05	1.33653e-05	4.41557e-05	0	2.04026e-06	0	0	0	0	0	0	0	0	Bacteria; Chloroflexi; SAR202 clade; uncultured Chloroflexi bacterium; uncultured Chloroflexi bacterium; uncultured Chloroflexi bacterium; uncultured Chloroflexi bacterium
EU686599,30860,32338	2.5003e-05	7.91277e-05	3.4527e-05	7.23663e-05	0	0	0	0	0	0	0	0	0	0	Bacteria; Proteobacteria; Alphaproteobacteria; Rhodospirillales; Rhodospirillaceae; Defluviicoccus; uncultured bacterium
EU802813,1,1378	9.4129e-05	9.17881e-05	2.22755e-06	1.71717e-05	0	1.02013e-06	3.95978e-06	0	0	0	0	0	0	0	Bacteria; Proteobacteria; Alphaproteobacteria; Rickettsiales; SAR116 clade; uncultured bacterium; uncultured bacterium
New,CleanUp,ReferenceOTU31753	1.32369e-05	7.12149e-05	9.13296e-05	3.31168e-05	0	0	1.31993e-06	0	0	0	0	0	0	0	Bacteria; Verrucomicrobia; S-BQ2-57 soil group
New,CleanUp,ReferenceOTU49996	8.97167e-05	9.49532e-06	8.46469e-05	2.20778e-05	0	0	3.95978e-06	0	0	0	0	0	0	0	Bacteria; Chloroflexi; SAR202 clade; uncultured bacterium; uncultured bacterium; uncultured bacterium; uncultured bacterium
New,CleanUp,ReferenceOTU57269	5.73599e-05	5.85545e-05	7.01679e-05	1.83982e-05	0	5.10064e-06	0	0	0	0	0	0	0	0	Bacteria; Verrucomicrobia; Arctic97B-4 marine group; uncultured bacterium; uncultured bacterium; uncultured bacterium; uncultured bacterium
New,CleanUp,ReferenceOTU586458	8.53044e-05	6.17196e-05	3.78684e-05	2.45309e-05	0	0	0	0	0	0	0	0	0	0	Bacteria; Proteobacteria; Deltaproteobacteria; Bdellovibrionales; Bdellovibrionaceae; OM27 clade; uncultured delta proteobacterium
New,CleanUp,ReferenceOTU462634	2.5003e-05	8.8623e-05	5.23474e-05	3.92495e-05	0	4.08051e-06	0	0	0	0	0	0	0	0	Bacteria; Planctomycetes; Pla3 lineage; uncultured bacterium; uncultured bacterium; uncultured bacterium; uncultured bacterium
New,CleanUp,ReferenceOTU658065	7.64798e-05	8.54579e-05	1.55929e-05	2.82106e-05	0	2.04026e-06	1.31993e-06	0	0	0	0	0	0	0	Bacteria; Chloroflexi; SAR202 clade
New,CleanUp,ReferenceOTU1047872	8.53044e-05	5.22243e-05	4.23235e-05	2.6984e-05	0	2.04026e-06	0	0	0	0	0	0	0	0	Bacteria; Chloroflexi; SAR202 clade; uncultured bacterium; uncultured bacterium; uncultured bacterium; uncultured bacterium
New,CleanUp,ReferenceOTU259906	0.000208849	0	0	0	0	0	0	0	0	0	0	0	0	0	Bacteria; Bacteroidetes; Flavobacteriia; Flavobacteriales; Flavobacteriaceae; Sediminicola
New,CleanUp,ReferenceOTU816734	5.14768e-05	0.000120274	1.0024e-05	2.6984e-05	0	0	0	0	0	0	0	0	0	0	Bacteria; Chloroflexi; SAR202 clade
New,CleanUp,ReferenceOTU215836	7.79506e-05	6.0137e-05	3.89821e-05	3.06637e-05	0	1.02013e-06	0	0	0	0	0	0	0	0	Bacteria; Chloroflexi; SAR202 clade; uncultured Chloroflexi bacterium; uncultured Chloroflexi bacterium; uncultured Chloroflexi bacterium; uncultured Chloroflexi bacterium
HM558572,1,1385	3.08861e-05	0.000109196	2.33893e-05	4.41557e-05	0	1.02013e-06	0	0	0	0	0	0	0	0	Bacteria; Acidobacteria; Acidobacteria; Subgroup 6; uncultured bacterium; uncultured bacterium; uncultured bacterium
New,ReferenceOTU945	9.55998e-05	4.90592e-05	4.90061e-05	1.47186e-05	0	0	0	0	0	0	0	0	0	0	Bacteria; Chloroflexi; SAR202 clade
New,CleanUp,ReferenceOTU582311	3.23568e-05	0	5.4575e-05	3.18902e-05	0	5.20265e-05	3.69579e-05	0	0	0	0	0	0	0	Bacteria; Proteobacteria; Gammaproteobacteria; Alteromonadales; Alteromonadaceae; Marinobacter; uncultured Marinobacter sp,
New,CleanUp,ReferenceOTU272317	7.35383e-05	6.17196e-05	3.89821e-05	2.82106e-05	0	4.08051e-06	0	0	0	0	0	0	0	0	Bacteria; Lentisphaerae; Lentisphaeria; Lentisphaerales; Lentisphaeraceae; Lentisphaera; uncultured bacterium
New,ReferenceOTU307	5.44183e-05	7.438e-05	7.01679e-05	7.35928e-06	0	0	0	0	0	0	0	0	0	0	Bacteria; Proteobacteria; Gammaproteobacteria; Oceanospirillales; Halomonadaceae; Halomonas
JN233054,1,1435	1.47077e-05	0.000121857	1.55929e-05	5.1515e-05	0	0	2.63985e-06	0	0	0	0	0	0	0	Bacteria; Chloroflexi; SAR202 clade
EU802625,1,1413	7.5009e-05	5.85545e-05	0	6.62335e-05	0	5.10064e-06	1.31993e-06	0	0	0	0	0	0	0	Bacteria; Proteobacteria; Gammaproteobacteria; Oceanospirillales; SAR86 clade; uncultured bacterium; uncultured bacterium
New,CleanUp,ReferenceOTU1116558	8.67752e-05	7.438e-05	1.67066e-05	2.82106e-05	0	0	0	0	0	0	0	0	0	0	Bacteria; Chloroflexi; SAR202 clade; uncultured bacterium; uncultured bacterium; uncultured bacterium; uncultured bacterium
New,CleanUp,ReferenceOTU355649	5.29476e-05	8.22928e-05	3.67546e-05	3.18902e-05	0	2.04026e-06	0	0	0	0	0	0	0	0	Bacteria; Chloroflexi; SAR202 clade; uncultured bacterium; uncultured bacterium; uncultured bacterium; uncultured bacterium
New,CleanUp,ReferenceOTU917004	7.20675e-05	5.22243e-05	6.23714e-05	9.81238e-06	0	7.1409e-06	1.31993e-06	0	0	0	0	0	0	0	Bacteria; Planctomycetes; Phycisphaerae; Phycisphaerales; Phycisphaeraceae; Phycisphaera
New,CleanUp,ReferenceOTU133696	7.20675e-05	4.58941e-05	3.78684e-05	4.53822e-05	0	3.06038e-06	0	0	0	0	0	0	0	0	Bacteria; Chloroflexi; SAR202 clade
HQ673719,1,1437	4.70645e-05	6.80498e-05	3.78684e-05	4.29291e-05	0	3.06038e-06	5.27971e-06	0	0	0	0	0	0	0	Bacteria; Proteobacteria; Alphaproteobacteria; SAR11 clade; Deep 1; uncultured bacterium; uncultured bacterium
HG004168,1,1437	1.61784e-05	0.000102866	5.12337e-05	3.18902e-05	0	2.04026e-06	0	0	0	0	0	0	0	0	Bacteria; Proteobacteria; Gammaproteobacteria; Alteromonadales; Alteromonadaceae; Dasania; uncultured bacterium
New,CleanUp,ReferenceOTU313207	6.76552e-05	8.70405e-05	2.22755e-05	2.6984e-05	0	0	0	0	0	0	0	0	0	0	Bacteria; Planctomycetes; Pla4 lineage; uncultured bacterium; uncultured bacterium; uncultured bacterium; uncultured bacterium
AY592095,1,1202	5.44183e-05	4.2729e-05	6.4599e-05	3.31168e-05	0	2.04026e-06	6.59963e-06	0	0	0	0	0	0	0	Bacteria; Chloroflexi; SAR202 clade; uncultured bacterium; uncultured bacterium; uncultured bacterium; uncultured bacterium
New,CleanUp,ReferenceOTU165014	7.35383e-05	5.53894e-05	4.23235e-05	2.82106e-05	0	0	3.95978e-06	0	0	0	0	0	0	0	Bacteria; Chloroflexi; SAR202 clade; uncultured bacterium; uncultured bacterium; uncultured bacterium; uncultured bacterium
New,CleanUp,ReferenceOTU1059061	5.73599e-05	0	0.000140336	3.67964e-06	0	2.04026e-06	0	0	0	0	0	0	0	0	Bacteria; Proteobacteria; Gammaproteobacteria; Alteromonadales; Idiomarinaceae; Idiomarina
New,CleanUp,ReferenceOTU897806	8.97167e-05	4.90592e-05	8.9102e-06	5.27415e-05	0	0	2.63985e-06	0	0	0	0	0	0	0	Unassigned
EF574189,1,1476	5.29476e-05	8.8623e-05	0	6.13273e-05	0	0	0	0	0	0	0	0	0	0	Bacteria; Proteobacteria; Deltaproteobacteria; SAR324 clade(Marine group B); uncultured bacterium; uncultured bacterium; uncultured bacterium
New,CleanUp,ReferenceOTU64034	3.97107e-05	9.33707e-05	3.22995e-05	3.18902e-05	0	4.08051e-06	1.31993e-06	0	0	0	0	0	0	0	Bacteria; Proteobacteria; Alphaproteobacteria; Rhodospirillales; Rhodospirillaceae
New,CleanUp,ReferenceOTU327852	6.76552e-05	7.59626e-05	1.22515e-05	4.66088e-05	0	0	0	0	0	0	0	0	0	0	Unassigned
JX524991,1,1440	0.000108837	4.90592e-05	2.89582e-05	1.22655e-05	0	3.06038e-06	0	0	0	0	0	0	0	0	Bacteria; Proteobacteria; Gammaproteobacteria; Alteromonadales; Colwelliaceae; Colwellia
New,CleanUp,ReferenceOTU362425	2.35322e-05	0.000101283	3.34133e-05	4.0476e-05	0	0	2.63985e-06	0	0	0	0	0	0	0	Bacteria; Planctomycetes; Phycisphaerae
New,CleanUp,ReferenceOTU189784	3.67691e-05	9.33707e-05	3.11857e-05	3.55699e-05	0	4.08051e-06	0	0	0	0	0	0	0	0	Bacteria; Proteobacteria; Deltaproteobacteria; GR-WP33-30; uncultured bacterium; uncultured bacterium; uncultured bacterium
HQ672339,1,1453	8.53044e-05	5.06417e-05	3.22995e-05	3.06637e-05	0	2.04026e-06	0	0	0	0	0	0	0	0	Bacteria; Proteobacteria; Deltaproteobacteria; Bdellovibrionales; Bdellovibrionaceae; OM27 clade; uncultured bacterium
HQ673882,1,1474	3.82399e-05	0.000106031	2.33893e-05	3.18902e-05	0	0	1.31993e-06	0	0	0	0	0	0	0	Bacteria; Proteobacteria; Deltaproteobacteria; SAR324 clade(Marine group B); uncultured bacterium; uncultured bacterium; uncultured bacterium
New,CleanUp,ReferenceOTU148826	4.4123e-06	0.000106031	4.78923e-05	4.0476e-05	0	2.04026e-06	0	0	0	0	0	0	0	0	Bacteria; Planctomycetes; Phycisphaerae; Phycisphaerales; Phycisphaeraceae; Phycisphaera; uncultured bacterium
HQ672927,1,1511	1.76492e-05	0.000104449	3.4527e-05	4.41557e-05	0	0	0	0	0	0	0	0	0	0	Bacteria; Proteobacteria; Deltaproteobacteria; Desulfuromonadales; GR-WP33-58; uncultured bacterium; uncultured bacterium
New,CleanUp,ReferenceOTU939825	2.94153e-05	9.02056e-05	2.56168e-05	5.51946e-05	0	0	0	0	0	0	0	0	0	0	Bacteria; Chloroflexi; SAR202 clade; uncultured Chloroflexi bacterium; uncultured Chloroflexi bacterium; uncultured Chloroflexi bacterium; uncultured Chloroflexi bacterium
New,CleanUp,ReferenceOTU538828	1.912e-05	7.75451e-05	4.34372e-05	6.01008e-05	0	0	0	0	0	0	0	0	0	0	Bacteria; Chloroflexi; SAR202 clade; uncultured Chloroflexi bacterium; uncultured Chloroflexi bacterium; uncultured Chloroflexi bacterium; uncultured Chloroflexi bacterium
New,CleanUp,ReferenceOTU653536	6.03014e-05	1.58255e-06	0.000130312	4.90619e-06	0	3.06038e-06	0	0	0	0	0	0	0	0	Unassigned
New,CleanUp,ReferenceOTU759884	2.94153e-05	4.90592e-05	3.4527e-05	8.70848e-05	0	0	0	0	0	0	0	0	0	0	Bacteria; Proteobacteria; Gammaproteobacteria; Xanthomonadales; uncultured; uncultured gamma proteobacterium; uncultured gamma proteobacterium
New,CleanUp,ReferenceOTU1045394	4.70645e-05	6.0137e-05	5.34612e-05	3.55699e-05	0	3.06038e-06	0	0	0	0	0	0	0	0	Unassigned
New,CleanUp,ReferenceOTU572186	8.38336e-05	4.74766e-05	0	4.0476e-05	0	2.34629e-05	3.95978e-06	0	0	0	0	0	0	0	Bacteria; Proteobacteria; Alphaproteobacteria; Rickettsiales; S25-593; uncultured bacterium; uncultured bacterium
New,CleanUp,ReferenceOTU669215	4.4123e-05	0.000107614	3.11857e-05	1.59451e-05	0	0	0	0	0	0	0	0	0	0	Bacteria; Proteobacteria; Deltaproteobacteria; Sh765B-TzT-29; uncultured bacterium; uncultured bacterium; uncultured bacterium
New,CleanUp,ReferenceOTU770887	5.88306e-05	3.79813e-05	5.79163e-05	4.0476e-05	0	3.06038e-06	0	0	0	0	0	0	0	0	Bacteria; Acidobacteria; Acidobacteria; Subgroup 6; uncultured bacterium; uncultured bacterium; uncultured bacterium
New,CleanUp,ReferenceOTU762595	3.38276e-05	7.27975e-05	6.34852e-05	2.6984e-05	0	1.02013e-06	0	0	0	0	0	0	0	0	Bacteria; Gemmatimonadetes; Gemmatimonadetes; BD2-11 terrestrial group; uncultured bacterium; uncultured bacterium; uncultured bacterium
JQ032009,1,1212	0.000180904	0	2.22755e-06	8.58583e-06	0	6.12077e-06	0	0	0	0	0	0	0	0	Bacteria; Proteobacteria; Gammaproteobacteria; Alteromonadales; Idiomarinaceae; Idiomarina; uncultured bacterium
New,CleanUp,ReferenceOTU958371	2.79445e-05	7.12149e-05	8.01918e-05	1.83982e-05	0	0	0	0	0	0	0	0	0	0	Bacteria; Proteobacteria; Deltaproteobacteria; Myxococcales; VHS-B3-70; uncultured delta proteobacterium; uncultured delta proteobacterium
New,CleanUp,ReferenceOTU961186	2.35322e-05	0.000132935	6.68265e-06	3.43433e-05	0	0	0	0	0	0	0	0	0	0	Bacteria; Acidobacteria; Acidobacteria; Subgroup 11; uncultured Acidobacteria bacterium; uncultured Acidobacteria bacterium; uncultured Acidobacteria bacterium
JQ032039,1,1396	1.47077e-06	1.58255e-06	2.22755e-06	0	0	0.000173422	1.8479e-05	0	0	0	0	0	0	0	Bacteria; Proteobacteria; Gammaproteobacteria; Oceanospirillales; Halomonadaceae; Halomonas; uncultured Halomonas sp,
HQ674339,1,1538	2.35322e-05	4.2729e-05	3.56408e-05	8.95379e-05	0	4.08051e-06	1.31993e-06	0	0	0	0	0	0	0	Bacteria; Planctomycetes; BD7-11; uncultured bacterium; uncultured bacterium; uncultured bacterium; uncultured bacterium
New,CleanUp,ReferenceOTU81470	7.35383e-05	5.53894e-05	2.89582e-05	3.55699e-05	0	0	2.63985e-06	0	0	0	0	0	0	0	Bacteria; Proteobacteria; Alphaproteobacteria; Rhodospirillales; Rhodospirillaceae
New,CleanUp,ReferenceOTU134748	6.32429e-05	5.69719e-05	4.67786e-05	2.6984e-05	0	2.04026e-06	0	0	0	0	0	0	0	0	Bacteria; Proteobacteria; Gammaproteobacteria; Oceanospirillales; Halomonadaceae; Halomonas
New,CleanUp,ReferenceOTU819345	4.26522e-05	7.438e-05	1.22515e-05	6.13273e-05	0	0	5.27971e-06	0	0	0	0	0	0	0	Unassigned
JQ678434,1,1542	6.03014e-05	4.2729e-05	5.34612e-05	3.8023e-05	0	1.02013e-06	0	0	0	0	0	0	0	0	Bacteria; Proteobacteria; Deltaproteobacteria; Bdellovibrionales; Bdellovibrionaceae; OM27 clade; uncultured delta proteobacterium
New,CleanUp,ReferenceOTU830743	6.47137e-05	3.79813e-05	5.23474e-05	4.0476e-05	0	0	0	0	0	0	0	0	0	0	Unassigned
New,CleanUp,ReferenceOTU239122	5.88306e-06	0.000137682	1.0024e-05	4.0476e-05	0	1.02013e-06	0	0	0	0	0	0	0	0	Bacteria; Planctomycetes; Pla3 lineage; uncultured bacterium; uncultured bacterium; uncultured bacterium; uncultured bacterium
New,CleanUp,ReferenceOTU913639	2.64738e-05	0.000110779	2.33893e-05	3.43433e-05	0	0	0	0	0	0	0	0	0	0	Bacteria; Lentisphaerae; WCHB1-41; uncultured organism; uncultured organism; uncultured organism; uncultured organism
EU802587,1,1484	2.94153e-05	7.59626e-05	0	8.70848e-05	0	1.02013e-06	1.31993e-06	0	0	0	0	0	0	0	Bacteria; Proteobacteria; Gammaproteobacteria; Oceanospirillales; SAR86 clade; uncultured bacterium; uncultured bacterium
New,CleanUp,ReferenceOTU963388	6.32429e-05	3.79813e-05	5.12337e-05	3.92495e-05	0	3.06038e-06	0	0	0	0	0	0	0	0	Bacteria; Chloroflexi; SAR202 clade
GU118913,1,1394	2.94153e-05	7.91277e-05	4.34372e-05	3.67964e-05	0	3.06038e-06	2.63985e-06	0	0	0	0	0	0	0	Bacteria; Planctomycetes; Planctomycetacia; Planctomycetales; Planctomycetaceae; Rhodopirellula; uncultured bacterium
New,CleanUp,ReferenceOTU74444	6.9126e-05	4.11464e-05	2.45031e-05	5.88743e-05	0	0	0	0	0	0	0	0	0	0	Bacteria; Chloroflexi; SAR202 clade; uncultured bacterium; uncultured bacterium; uncultured bacterium; uncultured bacterium
New,CleanUp,ReferenceOTU483999	8.53044e-05	5.85545e-05	5.56888e-06	4.41557e-05	0	0	0	0	0	0	0	0	0	0	Bacteria; Proteobacteria; Deltaproteobacteria; Bdellovibrionales; Bdellovibrionaceae; OM27 clade; uncultured delta proteobacterium
New,CleanUp,ReferenceOTU470919	5.88306e-05	7.59626e-05	5.12337e-05	7.35928e-06	0	0	0	0	0	0	0	0	0	0	Bacteria; Chloroflexi; SAR202 clade; uncultured bacterium; uncultured bacterium; uncultured bacterium; uncultured bacterium
New,CleanUp,ReferenceOTU598633	2.5003e-05	0.000126604	2.11617e-05	1.96248e-05	0	0	0	0	0	0	0	0	0	0	Bacteria; Planctomycetes; OM190
New,CleanUp,ReferenceOTU956743	7.35383e-06	0	3.11857e-05	6.13273e-06	0	3.87649e-05	0.000108234	0	0	0	0	0	0	0	Bacteria; Proteobacteria; Gammaproteobacteria; Alteromonadales; Alteromonadaceae; Marinobacter
New,CleanUp,ReferenceOTU595357	1.02954e-05	8.70405e-05	3.00719e-05	6.25539e-05	0	0	1.31993e-06	0	0	0	0	0	0	0	Bacteria; Verrucomicrobia; Opitutae; RS-B22; uncultured bacterium; uncultured bacterium; uncultured bacterium
New,CleanUp,ReferenceOTU755175	1.32369e-05	4.74766e-06	0.000167066	6.13273e-06	0	0	0	0	0	0	0	0	0	0	Bacteria; Proteobacteria; Gammaproteobacteria; Alteromonadales; Idiomarinaceae; Idiomarina
New,CleanUp,ReferenceOTU553991	4.4123e-06	0.000106031	2.56168e-05	4.66088e-05	0	3.06038e-06	5.27971e-06	0	0	0	0	0	0	0	Bacteria; Chloroflexi; JG30-KF-CM66
GQ337105,1,1472	8.23629e-05	2.8486e-05	5.23474e-05	2.57575e-05	0	2.04026e-06	0	0	0	0	0	0	0	0	Bacteria; Chloroflexi; SAR202 clade; uncultured Chloroflexi bacterium; uncultured Chloroflexi bacterium; uncultured Chloroflexi bacterium; uncultured Chloroflexi bacterium
New,CleanUp,ReferenceOTU1018587	7.64798e-05	2.37383e-05	4.00959e-05	4.78353e-05	0	2.04026e-06	0	0	0	0	0	0	0	0	Unassigned
GU235127,1,1377	1.02954e-05	0	8.9102e-06	0	0	0.000146898	2.37587e-05	0	0	0	0	0	0	0	Bacteria; Proteobacteria; Gammaproteobacteria; Alteromonadales; Psychromonadaceae; Psychromonas
DQ300515,1,1283	6.61845e-05	4.90592e-05	3.22995e-05	3.8023e-05	0	4.08051e-06	0	0	0	0	0	0	0	0	Archaea; Thaumarchaeota; Marine Group I; uncultured marine group I thaumarchaeote; uncultured marine group I thaumarchaeote; uncultured marine group I thaumarchaeote; uncultured marine group I thaumarchaeote
EF574657,1,1483	6.76552e-05	6.17196e-05	0	5.88743e-05	0	0	1.31993e-06	0	0	0	0	0	0	0	Bacteria; Bacteroidetes; Flavobacteriia; Flavobacteriales; Flavobacteriaceae
New,CleanUp,ReferenceOTU1015163	1.17661e-05	0.000129769	1.44791e-05	3.31168e-05	0	0	0	0	0	0	0	0	0	0	Bacteria; Chloroflexi; SAR202 clade
New,CleanUp,ReferenceOTU164955	5.14768e-05	7.438e-05	3.22995e-05	2.6984e-05	0	0	3.95978e-06	0	0	0	0	0	0	0	Bacteria; Chloroflexi; SAR202 clade; uncultured bacterium; uncultured bacterium; uncultured bacterium; uncultured bacterium
EU803046,1,1424	7.64798e-05	6.96324e-05	0	4.17026e-05	0	1.02013e-06	0	0	0	0	0	0	0	0	Bacteria; Proteobacteria; Alphaproteobacteria; Rhodobacterales; Rhodobacteraceae; uncultured; uncultured bacterium
AACY020463337,2,1288	4.11814e-05	0.000104449	0	4.17026e-05	0	0	1.31993e-06	0	0	0	0	0	0	0	Bacteria; Proteobacteria; Alphaproteobacteria; Rhodobacterales; Rhodobacteraceae; uncultured; uncultured bacterium
New,CleanUp,ReferenceOTU1128467	6.17722e-05	3.00685e-05	4.56648e-05	4.41557e-05	0	5.10064e-06	1.31993e-06	0	0	0	0	0	0	0	Archaea; Euryarchaeota; Thermoplasmata; Thermoplasmatales; Marine Group II; uncultured marine group II euryarchaeote; uncultured marine group II euryarchaeote
New,CleanUp,ReferenceOTU182247	7.35383e-06	0	0.000180432	0	0	0	0	0	0	0	0	0	0	0	Unassigned
ARCO01000012,23152,24420	1.912e-05	0.000115526	2.33893e-05	2.82106e-05	0	1.02013e-06	0	0	0	0	0	0	0	0	Bacteria; Chloroflexi; SAR202 clade
New,CleanUp,ReferenceOTU751231	5.73599e-05	1.10779e-05	1.55929e-05	4.90619e-06	0	3.06038e-06	9.50347e-05	0	0	0	0	0	0	0	Bacteria; Proteobacteria; Gammaproteobacteria; Oceanospirillales; SUP05 cluster
New,ReferenceOTU1986	2.64738e-05	8.22928e-05	2.89582e-05	4.66088e-05	0	2.04026e-06	0	0	0	0	0	0	0	0	Bacteria; Proteobacteria; Gammaproteobacteria; Xanthomonadales; uncultured
KF286207,1,1223	7.5009e-05	8.07103e-05	1.67066e-05	1.22655e-05	0	0	1.31993e-06	0	0	0	0	0	0	0	Bacteria; Chloroflexi; TK10
New,ReferenceOTU3	7.20675e-05	4.74766e-06	0	0.000109163	0	0	0	0	0	0	0	0	0	0	Bacteria; Bacteroidetes; Flavobacteriia; Flavobacteriales; Flavobacteriaceae; Sufflavibacter
New,CleanUp,ReferenceOTU83942	5.29476e-05	4.74766e-05	4.23235e-05	3.92495e-05	0	1.02013e-06	2.63985e-06	0	0	0	0	0	0	0	Bacteria; Acidobacteria; Acidobacteria; Subgroup 6; uncultured bacterium; uncultured bacterium; uncultured bacterium
New,CleanUp,ReferenceOTU197307	2.5003e-05	0	4.78923e-05	0.000109163	0	3.06038e-06	0	0	0	0	0	0	0	0	Bacteria; Bacteroidetes; Flavobacteriia; Flavobacteriales; Flavobacteriaceae; Mesonia
New,CleanUp,ReferenceOTU977137	4.4123e-05	4.2729e-05	2.33893e-05	7.48194e-05	0	0	0	0	0	0	0	0	0	0	Bacteria; Chloroflexi; SAR202 clade; uncultured bacterium; uncultured bacterium; uncultured bacterium; uncultured bacterium
AM997867,1,1504	3.08861e-05	6.17196e-05	7.01679e-05	1.96248e-05	0	0	2.63985e-06	0	0	0	0	0	0	0	Bacteria; Planctomycetes; Phycisphaerae; SHA-43; uncultured deep-sea bacterium; uncultured deep-sea bacterium; uncultured deep-sea bacterium
New,CleanUp,ReferenceOTU829499	3.23568e-05	8.70405e-05	4.12097e-05	1.83982e-05	0	2.04026e-06	3.95978e-06	0	0	0	0	0	0	0	Bacteria; Planctomycetes; Planctomycetacia; Planctomycetales; Planctomycetaceae; Pir4 lineage; uncultured bacterium
New,CleanUp,ReferenceOTU651375	7.20675e-05	2.69034e-05	7.12816e-05	1.47186e-05	0	0	0	0	0	0	0	0	0	0	Bacteria; Planctomycetes; Pla3 lineage; uncultured bacterium; uncultured bacterium; uncultured bacterium; uncultured bacterium
New,CleanUp,ReferenceOTU389164	4.85353e-05	8.70405e-05	2.22755e-05	2.6984e-05	0	0	0	0	0	0	0	0	0	0	Bacteria; Chloroflexi; SAR202 clade; uncultured bacterium; uncultured bacterium; uncultured bacterium; uncultured bacterium
GQ349054,1,1396	7.20675e-05	2.53209e-05	6.01439e-05	2.6984e-05	0	0	0	0	0	0	0	0	0	0	Bacteria; Planctomycetes; Pla4 lineage
New,CleanUp,ReferenceOTU674660	7.05967e-05	5.22243e-05	4.34372e-05	1.71717e-05	0	1.02013e-06	0	0	0	0	0	0	0	0	Bacteria; Proteobacteria; Deltaproteobacteria; Sh765B-TzT-29
DQ431899,1,1417	3.97107e-05	8.22928e-05	3.78684e-05	2.45309e-05	0	0	0	0	0	0	0	0	0	0	Bacteria; Gemmatimonadetes; Gemmatimonadetes; BD2-11 terrestrial group
New,CleanUp,ReferenceOTU205057	6.03014e-05	5.06417e-05	5.23474e-05	2.08513e-05	0	0	0	0	0	0	0	0	0	0	Bacteria; Chloroflexi; SAR202 clade; uncultured bacterium; uncultured bacterium; uncultured bacterium; uncultured bacterium
EU804284,1,1468	7.20675e-05	4.74766e-05	2.22755e-06	6.01008e-05	0	2.04026e-06	0	0	0	0	0	0	0	0	Bacteria; Bacteroidetes; Flavobacteriia; Flavobacteriales; Flavobacteriaceae; NS5 marine group; uncultured bacterium
HM798946,1,1315	7.35383e-05	3.00685e-05	5.79163e-05	2.08513e-05	0	0	1.31993e-06	0	0	0	0	0	0	0	Bacteria; Planctomycetes; OM190; uncultured planctomycete; uncultured planctomycete; uncultured planctomycete; uncultured planctomycete
New,CleanUp,ReferenceOTU398632	2.64738e-05	0.000113944	1.22515e-05	2.94371e-05	0	1.02013e-06	0	0	0	0	0	0	0	0	Bacteria; Chloroflexi; SAR202 clade; uncultured gamma proteobacterium; uncultured gamma proteobacterium; uncultured gamma proteobacterium; uncultured gamma proteobacterium
JQ013337,1,1381	4.55937e-05	7.12149e-05	2.45031e-05	3.31168e-05	0	7.1409e-06	1.31993e-06	0	0	0	0	0	0	0	Bacteria; Actinobacteria; Acidimicrobiia; Acidimicrobiales; OM1 clade; uncultured bacterium; uncultured bacterium
New,CleanUp,ReferenceOTU51051	3.08861e-05	8.70405e-05	1.33653e-05	5.1515e-05	0	0	0	0	0	0	0	0	0	0	Bacteria; Chloroflexi; SAR202 clade; uncultured bacterium; uncultured bacterium; uncultured bacterium; uncultured bacterium
GQ347593,1,1333	5.44183e-05	5.53894e-05	5.56888e-05	1.71717e-05	0	0	0	0	0	0	0	0	0	0	Bacteria; Proteobacteria; Alphaproteobacteria; Rhodospirillales; Rhodospirillaceae; Defluviicoccus; uncultured bacterium
New,ReferenceOTU2577	2.64738e-05	8.8623e-05	2.33893e-05	4.41557e-05	0	0	0	0	0	0	0	0	0	0	Bacteria; Gemmatimonadetes; Gemmatimonadetes; BD2-11 terrestrial group; uncultured bacterium; uncultured bacterium; uncultured bacterium
EU373947,1,1485	3.97107e-05	8.70405e-05	2.56168e-05	2.6984e-05	0	0	2.63985e-06	0	0	0	0	0	0	0	Bacteria; Acidobacteria; Acidobacteria; Subgroup 21
New,ReferenceOTU158	3.82399e-05	7.59626e-05	1.0024e-05	5.76477e-05	0	0	0	0	0	0	0	0	0	0	Bacteria; Deferribacteres; Deferribacteres; Deferribacterales; SAR406 clade(Marine group A); uncultured bacterium; uncultured bacterium
New,CleanUp,ReferenceOTU325047	2.20615e-05	8.38754e-05	4.67786e-05	2.57575e-05	0	0	2.63985e-06	0	0	0	0	0	0	0	Unassigned
DQ396241,1,1531	8.97167e-05	4.11464e-05	4.00959e-05	9.81238e-06	0	0	0	0	0	0	0	0	0	0	Bacteria; Planctomycetes; Planctomycetacia; Planctomycetales; Planctomycetaceae; Rhodopirellula
New,ReferenceOTU1267	5.14768e-05	3.95638e-05	2.0048e-05	6.86866e-05	0	0	0	0	0	0	0	0	0	0	Bacteria; Proteobacteria; Gammaproteobacteria; Alteromonadales; Alteromonadaceae; uncultured
JN018879,1,1413	5.44183e-05	5.53894e-05	3.00719e-05	3.67964e-05	0	3.06038e-06	0	0	0	0	0	0	0	0	Bacteria; Acidobacteria; Acidobacteria; Subgroup 6; uncultured bacterium; uncultured bacterium; uncultured bacterium
GQ351256,1,1447	5.58891e-05	5.22243e-05	2.33893e-05	4.41557e-05	0	0	3.95978e-06	0	0	0	0	0	0	0	Bacteria; Proteobacteria; Alphaproteobacteria; SAR11 clade; Surface 1
New,CleanUp,ReferenceOTU806731	2.05907e-05	0.000118692	1.22515e-05	2.33044e-05	0	2.04026e-06	2.63985e-06	0	0	0	0	0	0	0	Bacteria; Acidobacteria; Acidobacteria; Subgroup 6
New,CleanUp,ReferenceOTU508798	5.14768e-05	7.27975e-05	3.34133e-05	1.96248e-05	0	2.04026e-06	0	0	0	0	0	0	0	0	Bacteria; Chloroflexi; SAR202 clade; uncultured Chloroflexi bacterium; uncultured Chloroflexi bacterium; uncultured Chloroflexi bacterium; uncultured Chloroflexi bacterium
New,CleanUp,ReferenceOTU437651	5.44183e-05	7.438e-05	1.55929e-05	2.6984e-05	0	2.04026e-06	5.27971e-06	0	0	0	0	0	0	0	Unassigned
DQ395455,1,1506	0	7.91277e-06	7.79643e-06	1.83982e-05	0	2.04026e-05	0.000124073	0	0	0	0	0	0	0	Bacteria; Proteobacteria; Gammaproteobacteria; Alteromonadales; Moritellaceae; Moritella
New,CleanUp,ReferenceOTU669229	4.4123e-05	3.95638e-05	4.4551e-05	5.02884e-05	0	0	0	0	0	0	0	0	0	0	Bacteria; Chloroflexi; SAR202 clade
New,CleanUp,ReferenceOTU631316	1.47077e-06	0	0	0	0	0	0.00017687	0	0	0	0	0	0	0	Unassigned
New,CleanUp,ReferenceOTU156428	8.38336e-05	3.79813e-05	3.67546e-05	1.96248e-05	0	0	0	0	0	0	0	0	0	0	Bacteria; Chloroflexi; SAR202 clade
New,CleanUp,ReferenceOTU1131124	3.82399e-05	8.54579e-05	3.4527e-05	1.96248e-05	0	0	0	0	0	0	0	0	0	0	Bacteria; Verrucomicrobia; Arctic97B-4 marine group; uncultured bacterium; uncultured bacterium; uncultured bacterium; uncultured bacterium
New,CleanUp,ReferenceOTU717771	4.85353e-05	2.53209e-05	7.57367e-05	2.82106e-05	0	0	0	0	0	0	0	0	0	0	Bacteria; Chloroflexi; SAR202 clade; uncultured Chloroflexus sp,; uncultured Chloroflexus sp,; uncultured Chloroflexus sp,; uncultured Chloroflexus sp,
New,CleanUp,ReferenceOTU1134007	2.5003e-05	8.54579e-05	1.78204e-05	4.78353e-05	0	0	1.31993e-06	0	0	0	0	0	0	0	Bacteria; Chloroflexi; SAR202 clade; uncultured bacterium; uncultured bacterium; uncultured bacterium; uncultured bacterium
New,CleanUp,ReferenceOTU602738	5.88306e-06	0	0.000171521	0	0	0	0	0	0	0	0	0	0	0	Bacteria; Bacteroidetes; Flavobacteriia; Flavobacteriales; Flavobacteriaceae; Leeuwenhoekiella; Leeuwenhoekiella sp, M71_W34
AM997870,1,1459	4.70645e-05	5.22243e-05	4.90061e-05	2.6984e-05	0	2.04026e-06	0	0	0	0	0	0	0	0	Bacteria; Proteobacteria; Alphaproteobacteria; Rhodospirillales; Rhodospirillaceae; uncultured; uncultured bacterium
New,CleanUp,ReferenceOTU257944	8.67752e-05	2.21558e-05	5.56888e-05	1.22655e-05	0	0	0	0	0	0	0	0	0	0	Bacteria; Deferribacteres; Deferribacteres; Deferribacterales; SAR406 clade(Marine group A); uncultured bacterium; uncultured bacterium
HQ672155,1,1438	6.32429e-05	6.80498e-05	8.9102e-06	2.94371e-05	0	7.1409e-06	0	0	0	0	0	0	0	0	Bacteria; Cyanobacteria; Cyanobacteria; SubsectionI; FamilyI; Prochlorococcus; uncultured bacterium
EU265929,1,1502	0.000113249	0	4.23235e-05	1.47186e-05	0	2.04026e-06	3.95978e-06	0	0	0	0	0	0	0	Bacteria; Proteobacteria; Gammaproteobacteria; Oceanospirillales; SUP05 cluster; uncultured bacterium; uncultured bacterium
EU802545,1,1264	7.20675e-05	4.43115e-05	1.11378e-06	5.76477e-05	0	1.02013e-06	0	0	0	0	0	0	0	0	Bacteria; Proteobacteria; Alphaproteobacteria; Rickettsiales; SAR116 clade; uncultured bacterium; uncultured bacterium
New,CleanUp,ReferenceOTU224230	2.35322e-05	9.33707e-05	3.34133e-05	2.57575e-05	0	0	0	0	0	0	0	0	0	0	Unassigned
New,CleanUp,ReferenceOTU680264	7.5009e-05	4.2729e-05	3.78684e-05	1.83982e-05	0	2.04026e-06	0	0	0	0	0	0	0	0	Bacteria; Planctomycetes; Phycisphaerae; Phycisphaerales; Phycisphaeraceae; Phycisphaera; uncultured bacterium
HQ672271,1,1466	4.70645e-05	4.43115e-05	5.23474e-05	1.59451e-05	0	3.06038e-06	1.31993e-05	0	0	0	0	0	0	0	Bacteria; Proteobacteria; Alphaproteobacteria; SAR11 clade; Deep 1; uncultured bacterium; uncultured bacterium
New,ReferenceOTU2284	8.23629e-05	3.48162e-05	3.56408e-05	2.20778e-05	0	1.02013e-06	0	0	0	0	0	0	0	0	Bacteria; Chloroflexi; SAR202 clade
New,ReferenceOTU2348	8.08921e-05	5.69719e-05	1.22515e-05	2.57575e-05	0	0	0	0	0	0	0	0	0	0	Bacteria; Chloroflexi; SAR202 clade; uncultured bacterium; uncultured bacterium; uncultured bacterium; uncultured bacterium
New,CleanUp,ReferenceOTU869192	3.52984e-05	6.17196e-05	2.11617e-05	5.76477e-05	0	0	0	0	0	0	0	0	0	0	Bacteria; Planctomycetes; Phycisphaerae; Phycisphaerales; Phycisphaeraceae; Phycisphaera; uncultured organism
New,CleanUp,ReferenceOTU619662	0	1.58255e-06	0	0	0	1.32617e-05	0.000159711	0	0	0	0	0	0	0	Bacteria; Proteobacteria; Gammaproteobacteria; Oceanospirillales; SUP05 cluster; uncultured bacterium; uncultured bacterium
New,CleanUp,ReferenceOTU936054	0	1.58255e-06	0	0	0	0	0.00017291	0	0	0	0	0	0	0	Unassigned
JQ989468,1,1325	5.29476e-05	5.53894e-05	5.12337e-05	6.13273e-06	0	8.16103e-06	0	0	0	0	0	0	0	0	Bacteria; Gemmatimonadetes; Gemmatimonadetes; Gemmatimonadales; Gemmatimonadaceae; uncultured; uncultured bacterium
EU491161,1,1480	2.35322e-05	5.69719e-05	5.90301e-05	3.06637e-05	0	3.06038e-06	0	0	0	0	0	0	0	0	Bacteria; Acidobacteria; Acidobacteria; Subgroup 3; PAUC26f
New,CleanUp,ReferenceOTU77925	2.79445e-05	7.59626e-05	3.67546e-05	2.94371e-05	0	3.06038e-06	0	0	0	0	0	0	0	0	Bacteria; Lentisphaerae; WCHB1-41
New,CleanUp,ReferenceOTU485541	1.47077e-06	0	2.22755e-06	0	0	2.65233e-05	0.000142552	0	0	0	0	0	0	0	Bacteria; Proteobacteria; Epsilonproteobacteria; Campylobacterales; Helicobacteraceae; Sulfurovum; uncultured bacterium
JN166217,1,1521	6.03014e-05	2.69034e-05	4.23235e-05	3.92495e-05	0	1.02013e-06	2.63985e-06	0	0	0	0	0	0	0	Bacteria; Deferribacteres; Deferribacteres; Deferribacterales; SAR406 clade(Marine group A); uncultured bacterium; uncultured bacterium
New,CleanUp,ReferenceOTU1000075	2.94153e-05	8.22928e-05	3.22995e-05	2.33044e-05	0	1.02013e-06	3.95978e-06	0	0	0	0	0	0	0	Bacteria; Lentisphaerae; LD1-PA26
New,CleanUp,ReferenceOTU741069	6.76552e-05	1.74081e-05	6.57128e-05	1.83982e-05	0	3.06038e-06	0	0	0	0	0	0	0	0	Bacteria; Planctomycetes; Planctomycetacia; Planctomycetales; Planctomycetaceae; Planctomyces; uncultured bacterium
HQ674041,1,1504	4.70645e-05	5.85545e-05	4.78923e-05	1.3492e-05	0	5.10064e-06	0	0	0	0	0	0	0	0	Bacteria; Deferribacteres; Deferribacteres; Deferribacterales; PAUC34f; uncultured bacterium; uncultured bacterium
New,CleanUp,ReferenceOTU170826	6.76552e-05	3.79813e-05	3.4527e-05	3.18902e-05	0	0	0	0	0	0	0	0	0	0	Bacteria; Chloroflexi; SAR202 clade; uncultured bacterium; uncultured bacterium; uncultured bacterium; uncultured bacterium
HQ163697,1,1387	4.70645e-05	3.32336e-05	5.12337e-05	4.0476e-05	0	0	0	0	0	0	0	0	0	0	Bacteria; Deferribacteres; Deferribacteres; Deferribacterales; SAR406 clade(Marine group A); uncultured marine bacterium; uncultured marine bacterium
New,ReferenceOTU2174	5.88306e-06	0.000118692	4.4551e-06	4.17026e-05	0	1.02013e-06	0	0	0	0	0	0	0	0	Bacteria; Chloroflexi; JG30-KF-CM66
New,CleanUp,ReferenceOTU152801	5.0006e-05	7.438e-05	3.34133e-05	1.3492e-05	0	0	0	0	0	0	0	0	0	0	Bacteria; Planctomycetes; OM190; uncultured bacterium; uncultured bacterium; uncultured bacterium; uncultured bacterium
CU915207,1,1248	2.35322e-05	9.65358e-05	2.22755e-05	2.57575e-05	0	3.06038e-06	0	0	0	0	0	0	0	0	Bacteria; Proteobacteria; Gammaproteobacteria; Oceanospirillales; Halomonadaceae; Halomonas; uncultured Halomonas sp,
EU650260,1,1318	5.58891e-05	5.06417e-05	3.11857e-05	3.31168e-05	0	0	0	0	0	0	0	0	0	0	Archaea; Euryarchaeota; Thermoplasmata; Thermoplasmatales; Marine Group III; uncultured marine archaeon; uncultured marine archaeon
New,CleanUp,ReferenceOTU972491	3.97107e-05	6.17196e-05	5.23474e-05	1.59451e-05	0	1.02013e-06	0	0	0	0	0	0	0	0	Bacteria; Proteobacteria; Gammaproteobacteria; Oceanospirillales; Halomonadaceae; Halomonas
New,CleanUp,ReferenceOTU996190	8.97167e-05	3.63987e-05	3.00719e-05	1.3492e-05	0	1.02013e-06	0	0	0	0	0	0	0	0	Bacteria; Chloroflexi; SAR202 clade; uncultured bacterium; uncultured bacterium; uncultured bacterium; uncultured bacterium
JX879742,1,1391	0.000170609	0	0	0	0	0	0	0	0	0	0	0	0	0	Bacteria; Proteobacteria; Alphaproteobacteria; Sphingomonadales; Sphingomonadaceae; Sphingobium
New,ReferenceOTU1698	2.20615e-05	6.64673e-05	5.4575e-05	2.45309e-05	0	0	2.63985e-06	0	0	0	0	0	0	0	Bacteria; Lentisphaerae; WCHB1-41
New,CleanUp,ReferenceOTU929232	5.29476e-05	5.38068e-05	1.78204e-05	4.53822e-05	0	0	0	0	0	0	0	0	0	0	Bacteria; Chloroflexi; SAR202 clade
HQ674036,1,1522	2.20615e-05	8.70405e-05	5.56888e-06	5.51946e-05	0	0	0	0	0	0	0	0	0	0	Bacteria; Deferribacteres; Deferribacteres; Deferribacterales; SAR406 clade(Marine group A); uncultured bacterium; uncultured bacterium
New,ReferenceOTU1780	0.000105895	1.4243e-05	4.4551e-05	4.90619e-06	0	0	0	0	0	0	0	0	0	0	Bacteria; Chloroflexi; SAR202 clade; uncultured Chloroflexi bacterium; uncultured Chloroflexi bacterium; uncultured Chloroflexi bacterium; uncultured Chloroflexi bacterium
New,CleanUp,ReferenceOTU958090	7.05967e-05	6.48847e-05	5.56888e-06	2.82106e-05	0	0	0	0	0	0	0	0	0	0	Bacteria; Proteobacteria; Deltaproteobacteria; SAR324 clade(Marine group B); uncultured bacterium; uncultured bacterium; uncultured bacterium
New,ReferenceOTU1641	1.61784e-05	0.000101283	1.33653e-05	3.8023e-05	0	0	0	0	0	0	0	0	0	0	Bacteria; Acidobacteria; Acidobacteria; Subgroup 6
New,CleanUp,ReferenceOTU56247	3.52984e-05	5.38068e-05	3.67546e-05	4.29291e-05	0	0	0	0	0	0	0	0	0	0	Bacteria; Gemmatimonadetes; Gemmatimonadetes; BD2-11 terrestrial group; uncultured bacterium; uncultured bacterium; uncultured bacterium
JQ612243,1,1497	8.82459e-06	7.91277e-05	4.00959e-05	3.8023e-05	0	0	2.63985e-06	0	0	0	0	0	0	0	Bacteria; Acidobacteria; Acidobacteria; Subgroup 15; uncultured bacterium; uncultured bacterium; uncultured bacterium
JQ221386,1,913	3.08861e-05	7.59626e-05	3.11857e-05	2.33044e-05	1.08473e-06	2.04026e-06	3.95978e-06	0	0	0	0	0	0	0	Archaea; Thaumarchaeota; Marine Group I; uncultured marine archaeon; uncultured marine archaeon; uncultured marine archaeon; uncultured marine archaeon
New,ReferenceOTU958	3.82399e-05	6.33022e-05	1.89342e-05	4.78353e-05	0	0	0	0	0	0	0	0	0	0	Unassigned
New,CleanUp,ReferenceOTU286213	3.23568e-05	5.85545e-05	3.34133e-05	3.8023e-05	0	4.08051e-06	1.31993e-06	0	0	0	0	0	0	0	Bacteria; Chloroflexi; SAR202 clade; uncultured Chloroflexus sp,; uncultured Chloroflexus sp,; uncultured Chloroflexus sp,; uncultured Chloroflexus sp,
New,CleanUp,ReferenceOTU144677	3.08861e-05	6.80498e-05	2.78444e-05	4.0476e-05	0	0	0	0	0	0	0	0	0	0	Bacteria; Proteobacteria; Deltaproteobacteria; Desulfuromonadales; GR-WP33-58; uncultured bacterium; uncultured bacterium
New,CleanUp,ReferenceOTU434855	3.38276e-05	6.0137e-05	4.00959e-05	3.31168e-05	0	0	0	0	0	0	0	0	0	0	Bacteria; Chloroflexi; TK10; uncultured Chloroflexi bacterium; uncultured Chloroflexi bacterium; uncultured Chloroflexi bacterium; uncultured Chloroflexi bacterium
New,CleanUp,ReferenceOTU736049	4.26522e-05	6.48847e-05	2.11617e-05	3.8023e-05	0	0	0	0	0	0	0	0	0	0	Bacteria; Proteobacteria; Gammaproteobacteria; Thiotrichales; Thiotrichales Incertae Sedis; Candidatus Endoecteinascidia; uncultured gamma proteobacterium
EF092445,1,1515	0	3.16511e-06	1.22515e-05	0	0	0.000150979	0	0	0	0	0	0	0	0	Bacteria; Proteobacteria; Deltaproteobacteria; Bdellovibrionales; Bacteriovoracaceae; Bacteriovorax
New,CleanUp,ReferenceOTU485152	4.11814e-05	4.43115e-05	3.67546e-05	4.0476e-05	0	1.02013e-06	2.63985e-06	0	0	0	0	0	0	0	Archaea; Thaumarchaeota; Marine Group I; uncultured marine archaeon; uncultured marine archaeon; uncultured marine archaeon; uncultured marine archaeon
DQ396003,1,1507	5.14768e-05	5.38068e-05	2.89582e-05	2.94371e-05	0	0	2.63985e-06	0	0	0	0	0	0	0	Bacteria; Proteobacteria; Deltaproteobacteria; SAR324 clade(Marine group B); uncultured bacterium; uncultured bacterium; uncultured bacterium
New,ReferenceOTU1557	0	0.000144012	1.55929e-05	6.13273e-06	0	0	0	0	0	0	0	0	0	0	Bacteria; Proteobacteria; Alphaproteobacteria; Rhodobacterales; Rhodobacteraceae; Paracoccus
New,CleanUp,ReferenceOTU1015302	5.29476e-05	4.58941e-05	3.4527e-05	2.94371e-05	0	0	1.31993e-06	0	0	0	0	0	0	0	Bacteria; Deferribacteres; Deferribacteres; Deferribacterales; Deferribacterales Incertae Sedis; Caldithrix; uncultured Deferribacteres bacterium
New,CleanUp,ReferenceOTU399717	3.52984e-05	0.000112361	1.33653e-05	0	0	3.06038e-06	0	0	0	0	0	0	0	0	Bacteria; Chloroflexi; JG30-KF-CM66; uncultured Chloroflexi bacterium; uncultured Chloroflexi bacterium; uncultured Chloroflexi bacterium; uncultured Chloroflexi bacterium
AB022713,1,1308	7.20675e-05	6.33022e-05	5.56888e-06	1.83982e-05	0	2.04026e-06	2.63985e-06	0	0	0	0	0	0	0	Bacteria; Proteobacteria; Gammaproteobacteria; KI89A clade
New,CleanUp,ReferenceOTU1031682	7.05967e-05	4.11464e-05	3.22995e-05	1.96248e-05	0	0	0	0	0	0	0	0	0	0	Bacteria; Chloroflexi; SAR202 clade
New,CleanUp,ReferenceOTU954981	2.5003e-05	8.54579e-05	1.78204e-05	3.43433e-05	0	1.02013e-06	0	0	0	0	0	0	0	0	Bacteria; Gemmatimonadetes; Gemmatimonadetes; BD2-11 terrestrial group; uncultured bacterium; uncultured bacterium; uncultured bacterium
New,CleanUp,ReferenceOTU548084	4.11814e-05	6.48847e-05	3.78684e-05	1.96248e-05	0	0	0	0	0	0	0	0	0	0	Bacteria; Proteobacteria; Alphaproteobacteria; Rhodospirillales; Rhodospirillaceae; uncultured; uncultured bacterium
New,CleanUp,ReferenceOTU626386	8.82459e-06	6.0137e-05	3.22995e-05	5.76477e-05	0	3.06038e-06	1.31993e-06	0	0	0	0	0	0	0	Bacteria; Cyanobacteria; ML635J-21; uncultured bacterium; uncultured bacterium; uncultured bacterium; uncultured bacterium
New,ReferenceOTU2117	4.70645e-05	4.11464e-05	6.79403e-05	3.67964e-06	0	3.06038e-06	0	0	0	0	0	0	0	0	Bacteria; Proteobacteria; Gammaproteobacteria; Oceanospirillales; Halomonadaceae; Halomonas
New,CleanUp,ReferenceOTU828795	2.79445e-05	5.22243e-05	3.56408e-05	4.0476e-05	0	0	6.59963e-06	0	0	0	0	0	0	0	Bacteria; Chloroflexi; SAR202 clade; uncultured bacterium; uncultured bacterium; uncultured bacterium; uncultured bacterium
New,CleanUp,ReferenceOTU112408	3.23568e-05	7.91277e-05	5.01199e-05	1.22655e-06	0	0	0	0	0	0	0	0	0	0	Unassigned
GQ346854,1,1339	2.20615e-05	7.27975e-05	4.23235e-05	2.45309e-05	0	1.02013e-06	0	0	0	0	0	0	0	0	Bacteria; Chloroflexi; SAR202 clade; uncultured Chloroflexi bacterium; uncultured Chloroflexi bacterium; uncultured Chloroflexi bacterium; uncultured Chloroflexi bacterium
New,CleanUp,ReferenceOTU578463	5.58891e-05	7.438e-05	1.89342e-05	1.3492e-05	0	0	0	0	0	0	0	0	0	0	Bacteria; Chloroflexi; SAR202 clade; uncultured bacterium; uncultured bacterium; uncultured bacterium; uncultured bacterium
JN233146,1,1464	0	0.000101283	0	6.13273e-05	0	0	0	0	0	0	0	0	0	0	Bacteria; Planctomycetes; Planctomycetacia; Planctomycetales; Planctomycetaceae
EU802822,1,1385	3.67691e-05	4.74766e-05	1.89342e-05	5.64212e-05	0	0	2.63985e-06	0	0	0	0	0	0	0	Bacteria; Proteobacteria; Alphaproteobacteria; SAR11 clade; Surface 1; uncultured bacterium; uncultured bacterium
New,CleanUp,ReferenceOTU26620	6.03014e-05	3.63987e-05	4.4551e-05	2.08513e-05	0	0	0	0	0	0	0	0	0	0	Bacteria; Bacteroidetes; Cytophagia; Cytophagales; Flammeovirgaceae; uncultured
JN166340,1,1464	1.32369e-05	9.33707e-05	1.0024e-05	4.53822e-05	0	0	0	0	0	0	0	0	0	0	Bacteria; Chloroflexi; SAR202 clade; uncultured marine microorganism; uncultured marine microorganism; uncultured marine microorganism; uncultured marine microorganism
New,ReferenceOTU140	2.05907e-05	6.17196e-05	0	7.72725e-05	0	1.02013e-06	1.31993e-06	0	0	0	0	0	0	0	Bacteria; Proteobacteria; Gammaproteobacteria; Oceanospirillales; SAR86 clade; uncultured bacterium; uncultured bacterium
New,ReferenceOTU1349	7.94213e-05	4.2729e-05	3.11857e-05	8.58583e-06	0	0	0	0	0	0	0	0	0	0	Bacteria; Acidobacteria; Acidobacteria; Subgroup 6; uncultured Acidobacteria bacterium; uncultured Acidobacteria bacterium; uncultured Acidobacteria bacterium
New,CleanUp,ReferenceOTU910954	4.85353e-05	4.43115e-05	3.89821e-05	2.6984e-05	0	3.06038e-06	0	0	0	0	0	0	0	0	Bacteria; Chloroflexi; SAR202 clade; uncultured Chloroflexus sp,; uncultured Chloroflexus sp,; uncultured Chloroflexus sp,; uncultured Chloroflexus sp,
HQ673946,1,1447	3.08861e-05	5.22243e-05	3.89821e-05	3.67964e-05	0	0	2.63985e-06	0	0	0	0	0	0	0	Bacteria; Proteobacteria; Alphaproteobacteria; SAR11 clade; Deep 1
New,CleanUp,ReferenceOTU471628	2.79445e-05	5.69719e-05	3.78684e-05	3.43433e-05	0	4.08051e-06	0	0	0	0	0	0	0	0	Bacteria; Chloroflexi; Anaerolineae; Anaerolineales; Anaerolineaceae; uncultured; uncultured bacterium
EU394556,1,1501	4.70645e-05	9.02056e-05	4.4551e-06	1.83982e-05	0	1.02013e-06	0	0	0	0	0	0	0	0	Bacteria; Proteobacteria; Gammaproteobacteria; Oceanospirillales; SAR86 clade; uncultured bacterium; uncultured bacterium
New,CleanUp,ReferenceOTU107725	2.94153e-06	7.27975e-05	1.67066e-05	6.86866e-05	0	0	0	0	0	0	0	0	0	0	Bacteria; Acidobacteria; Acidobacteria; Subgroup 6; uncultured Acidobacteria bacterium; uncultured Acidobacteria bacterium; uncultured Acidobacteria bacterium
New,CleanUp,ReferenceOTU172575	5.14768e-05	5.38068e-05	3.11857e-05	2.45309e-05	0	0	0	0	0	0	0	0	0	0	Bacteria; Bacteroidetes; Cytophagia; Cytophagales; Flammeovirgaceae; uncultured
New,CleanUp,ReferenceOTU103151	4.11814e-05	4.58941e-05	3.56408e-05	3.8023e-05	0	0	0	0	0	0	0	0	0	0	Bacteria; Proteobacteria; Alphaproteobacteria; Rhodospirillales; Rhodospirillaceae; Defluviicoccus; uncultured bacterium
New,CleanUp,ReferenceOTU1135895	1.912e-05	7.91277e-05	4.4551e-05	1.22655e-05	0	0	5.27971e-06	0	0	0	0	0	0	0	Bacteria; Planctomycetes; Planctomycetacia; Planctomycetales; Planctomycetaceae; Pir4 lineage; uncultured bacterium
New,ReferenceOTU2538	2.5003e-05	4.2729e-05	5.4575e-05	3.8023e-05	0	0	0	0	0	0	0	0	0	0	Bacteria; Chloroflexi; JG30-KF-CM66; uncultured Chloroflexi bacterium; uncultured Chloroflexi bacterium; uncultured Chloroflexi bacterium; uncultured Chloroflexi bacterium
New,CleanUp,ReferenceOTU861238	6.76552e-05	3.32336e-05	4.67786e-05	7.35928e-06	0	0	5.27971e-06	0	0	0	0	0	0	0	Bacteria; Planctomycetes; Phycisphaerae; Phycisphaerales; Phycisphaeraceae; Phycisphaera; uncultured bacterium
New,CleanUp,ReferenceOTU683077	4.11814e-05	4.74766e-05	3.00719e-05	4.0476e-05	0	1.02013e-06	0	0	0	0	0	0	0	0	Bacteria; Deferribacteres; Deferribacteres; Deferribacterales; SAR406 clade(Marine group A); uncultured bacterium; uncultured bacterium
New,CleanUp,ReferenceOTU712405	3.82399e-05	3.63987e-05	2.56168e-05	5.76477e-05	0	2.04026e-06	0	0	0	0	0	0	0	0	Unassigned
New,CleanUp,ReferenceOTU612895	8.82459e-06	0	0.000134767	4.90619e-06	0	6.12077e-06	5.27971e-06	0	0	0	0	0	0	0	Archaea; Euryarchaeota; Halobacteria; Halobacteriales; Deep Sea Hydrothermal Vent Gp 6(DHVEG-6); uncultured archaeon; uncultured archaeon
New,ReferenceOTU665	5.58891e-05	3.16511e-06	7.01679e-05	3.06637e-05	0	0	0	0	0	0	0	0	0	0	Bacteria; Proteobacteria; Gammaproteobacteria; Alteromonadales; Idiomarinaceae; Idiomarina
New,CleanUp,ReferenceOTU758975	4.26522e-05	3.79813e-05	4.4551e-05	3.43433e-05	0	0	0	0	0	0	0	0	0	0	Bacteria; Chloroflexi; SAR202 clade; uncultured bacterium; uncultured bacterium; uncultured bacterium; uncultured bacterium
JN018956,1,1373	5.29476e-05	4.2729e-05	2.45031e-05	2.94371e-05	0	0	9.23948e-06	0	0	0	0	0	0	0	Bacteria; Proteobacteria; Deltaproteobacteria; SAR324 clade(Marine group B); uncultured bacterium; uncultured bacterium; uncultured bacterium
New,CleanUp,ReferenceOTU439356	4.11814e-05	5.22243e-05	8.9102e-06	5.64212e-05	0	0	0	0	0	0	0	0	0	0	Bacteria; Proteobacteria; Deltaproteobacteria; Sh765B-TzT-29; uncultured bacterium; uncultured bacterium; uncultured bacterium
New,CleanUp,ReferenceOTU229562	0	0.000104449	0	5.39681e-05	0	0	0	0	0	0	0	0	0	0	Bacteria; Gemmatimonadetes; Gemmatimonadetes; PAUC43f marine benthic group
New,CleanUp,ReferenceOTU24823	1.47077e-05	0	0.000143677	0	0	0	0	0	0	0	0	0	0	0	Bacteria; Proteobacteria; Gammaproteobacteria; Oceanospirillales; Halomonadaceae; Halomonas
New,CleanUp,ReferenceOTU457084	7.05967e-05	1.4243e-05	6.23714e-05	1.10389e-05	0	0	0	0	0	0	0	0	0	0	Bacteria; Proteobacteria; Betaproteobacteria; Burkholderiales; Comamonadaceae; Variovorax; uncultured bacterium
New,ReferenceOTU2244	2.64738e-05	5.69719e-05	3.78684e-05	2.94371e-05	0	6.12077e-06	1.31993e-06	0	0	0	0	0	0	0	Bacteria; Acidobacteria; Acidobacteria; Subgroup 6
New,CleanUp,ReferenceOTU211795	1.47077e-06	0	7.79643e-06	0	0	2.85636e-05	0.000120113	0	0	0	0	0	0	0	Bacteria; Proteobacteria; Gammaproteobacteria; Thiotrichales; Piscirickettsiaceae; Methylophaga; uncultured bacterium
EU491790,1,1458	3.23568e-05	6.96324e-05	1.78204e-05	3.8023e-05	0	0	0	0	0	0	0	0	0	0	Bacteria; Proteobacteria; Gammaproteobacteria; Alteromonadales; Alteromonadaceae; uncultured
New,CleanUp,ReferenceOTU39790	1.912e-05	0.000113944	1.67066e-05	7.35928e-06	0	0	0	0	0	0	0	0	0	0	Unassigned
New,CleanUp,ReferenceOTU640859	4.26522e-05	5.22243e-05	4.56648e-05	1.3492e-05	0	3.06038e-06	0	0	0	0	0	0	0	0	Bacteria; Proteobacteria; Deltaproteobacteria; Bdellovibrionales; Bdellovibrionaceae; OM27 clade; uncultured bacterium
HQ163204,1,1341	6.61845e-05	3.95638e-05	4.34372e-05	3.67964e-06	0	4.08051e-06	0	0	0	0	0	0	0	0	Bacteria; Proteobacteria; Deltaproteobacteria; Bdellovibrionales; Bdellovibrionaceae; OM27 clade; uncultured bacterium
New,CleanUp,ReferenceOTU575617	6.03014e-05	4.58941e-05	4.67786e-05	2.45309e-06	0	0	1.31993e-06	0	0	0	0	0	0	0	Bacteria; Chloroflexi; SAR202 clade
New,CleanUp,ReferenceOTU767375	5.0006e-05	6.0137e-05	3.89821e-05	7.35928e-06	0	0	0	0	0	0	0	0	0	0	Bacteria; Proteobacteria; Gammaproteobacteria; Oceanospirillales; Halomonadaceae; Halomonas
KC522886,1,1355	0.000100012	2.8486e-05	1.78204e-05	9.81238e-06	0	0	0	0	0	0	0	0	0	0	Bacteria; Proteobacteria; Gammaproteobacteria; Oceanospirillales; ZD0405; uncultured bacterium; uncultured bacterium
New,CleanUp,ReferenceOTU326359	0	0.000106031	1.55929e-05	3.43433e-05	0	0	0	0	0	0	0	0	0	0	Bacteria; Planctomycetes; Planctomycetacia; Planctomycetales; Planctomycetaceae; Rhodopirellula; uncultured bacterium
New,CleanUp,ReferenceOTU197048	7.94213e-05	3.48162e-05	2.67306e-05	1.10389e-05	0	0	3.95978e-06	0	0	0	0	0	0	0	Bacteria; Verrucomicrobia; OPB35 soil group; uncultured bacterium; uncultured bacterium; uncultured bacterium; uncultured bacterium
New,CleanUp,ReferenceOTU962219	5.88306e-06	9.33707e-05	0	5.64212e-05	0	0	0	0	0	0	0	0	0	0	Bacteria; Proteobacteria; Deltaproteobacteria; Desulfuromonadales; GR-WP33-58
New,CleanUp,ReferenceOTU994409	1.61784e-05	5.53894e-05	4.34372e-05	4.0476e-05	0	0	0	0	0	0	0	0	0	0	Bacteria; Proteobacteria; Deltaproteobacteria; Desulfuromonadales; GR-WP33-58; uncultured bacterium; uncultured bacterium
New,CleanUp,ReferenceOTU1056765	5.88306e-06	0.000110779	1.0024e-05	2.45309e-05	0	0	3.95978e-06	0	0	0	0	0	0	0	Unassigned
New,ReferenceOTU112	1.47077e-06	1.10779e-05	0	0.000142279	0	0	0	0	0	0	0	0	0	0	Bacteria; Proteobacteria; Gammaproteobacteria; Oceanospirillales; Halomonadaceae; Salinicola
EU686600,36462,38000	1.912e-05	8.70405e-05	2.45031e-05	2.08513e-05	1.08473e-06	2.04026e-06	0	0	0	0	0	0	0	0	Bacteria; Lentisphaerae; LD1-PA26
New,CleanUp,ReferenceOTU896657	1.02954e-05	0.000101283	1.11378e-06	4.17026e-05	0	0	0	0	0	0	0	0	0	0	Bacteria; Planctomycetes; Planctomycetacia; Planctomycetales; Planctomycetaceae; Rhodopirellula; uncultured bacterium
New,CleanUp,ReferenceOTU579668	4.11814e-05	4.11464e-05	2.56168e-05	4.41557e-05	0	0	1.31993e-06	0	0	0	0	0	0	0	Unassigned
EU686594,16595,18105	6.47137e-05	2.05732e-05	4.90061e-05	1.59451e-05	0	3.06038e-06	0	0	0	0	0	0	0	0	Bacteria; Proteobacteria; Deltaproteobacteria; Sh765B-TzT-29
New,CleanUp,ReferenceOTU870985	5.58891e-05	4.2729e-05	3.56408e-05	1.83982e-05	0	0	0	0	0	0	0	0	0	0	Bacteria; Proteobacteria; Deltaproteobacteria; Desulfuromonadales; GR-WP33-58
New,CleanUp,ReferenceOTU702008	1.47077e-05	7.438e-05	1.55929e-05	4.78353e-05	0	0	0	0	0	0	0	0	0	0	Bacteria; Proteobacteria; Deltaproteobacteria; Bdellovibrionales; Bdellovibrionaceae; OM27 clade
New,CleanUp,ReferenceOTU456911	8.82459e-06	7.12149e-05	4.4551e-06	6.74601e-05	0	0	0	0	0	0	0	0	0	0	Bacteria; Chloroflexi; SAR202 clade
JX227226,1,1512	4.11814e-05	5.53894e-05	3.67546e-05	1.47186e-05	0	1.02013e-06	2.63985e-06	0	0	0	0	0	0	0	Bacteria; Acidobacteria; Acidobacteria; Subgroup 13; uncultured bacterium; uncultured bacterium; uncultured bacterium
New,CleanUp,ReferenceOTU1080838	3.52984e-05	3.32336e-05	6.01439e-05	1.83982e-05	0	4.08051e-06	0	0	0	0	0	0	0	0	Bacteria; Planctomycetes; Planctomycetacia; Planctomycetales; Planctomycetaceae; Pir4 lineage
New,CleanUp,ReferenceOTU187941	8.82459e-06	7.91277e-05	2.0048e-05	4.29291e-05	0	0	0	0	0	0	0	0	0	0	Bacteria; Chloroflexi; SAR202 clade
EU804599,1,1456	9.4129e-05	1.58255e-05	0	4.0476e-05	0	0	0	0	0	0	0	0	0	0	Bacteria; Proteobacteria; Alphaproteobacteria; Rhodospirillales; Rhodospirillaceae; Defluviicoccus; uncultured bacterium
FJ191356,1,1405	8.82459e-06	1.58255e-06	0	0	0	0	0.000139912	0	0	0	0	0	0	0	Bacteria; Proteobacteria; Alphaproteobacteria; Sphingomonadales; Sphingomonadaceae; Sphingobium; uncultured Sphingobium sp,
New,CleanUp,ReferenceOTU889165	2.94153e-06	8.38754e-05	1.11378e-05	4.66088e-05	0	3.06038e-06	2.63985e-06	0	0	0	0	0	0	0	Bacteria; Planctomycetes; Pla3 lineage; uncultured bacterium; uncultured bacterium; uncultured bacterium; uncultured bacterium
EF574996,1,1461	5.14768e-05	4.90592e-05	0	4.78353e-05	0	0	1.31993e-06	0	0	0	0	0	0	0	Bacteria; Proteobacteria; Elev-16S-509; uncultured bacterium; uncultured bacterium; uncultured bacterium; uncultured bacterium
New,CleanUp,ReferenceOTU383289	7.20675e-05	1.89906e-05	5.34612e-05	3.67964e-06	0	1.02013e-06	0	0	0	0	0	0	0	0	Bacteria; Proteobacteria; Gammaproteobacteria; Oceanospirillales; Halomonadaceae; Halomonas
New,CleanUp,ReferenceOTU477489	3.82399e-05	3.48162e-05	3.67546e-05	3.92495e-05	0	0	0	0	0	0	0	0	0	0	Bacteria; Proteobacteria; Deltaproteobacteria; Desulfuromonadales
New,CleanUp,ReferenceOTU360020	5.14768e-05	2.69034e-05	5.34612e-05	1.71717e-05	0	0	0	0	0	0	0	0	0	0	Bacteria; Gemmatimonadetes; Gemmatimonadetes; BD2-11 terrestrial group
New,CleanUp,ReferenceOTU290182	2.20615e-05	7.59626e-05	1.33653e-05	3.67964e-05	0	0	0	0	0	0	0	0	0	0	Bacteria; Chloroflexi; SAR202 clade; uncultured Chloroflexi bacterium; uncultured Chloroflexi bacterium; uncultured Chloroflexi bacterium; uncultured Chloroflexi bacterium
New,ReferenceOTU788	7.05967e-05	1.58255e-06	6.4599e-05	1.10389e-05	0	0	0	0	0	0	0	0	0	0	Unassigned
New,CleanUp,ReferenceOTU241500	5.0006e-05	4.58941e-05	3.78684e-05	7.35928e-06	0	0	6.59963e-06	0	0	0	0	0	0	0	Bacteria; Chloroflexi; TK10; uncultured bacterium; uncultured bacterium; uncultured bacterium; uncultured bacterium
AF382132,1,1496	2.5003e-05	5.06417e-05	4.4551e-06	6.74601e-05	0	0	0	0	0	0	0	0	0	0	Bacteria; Proteobacteria; Gammaproteobacteria; Oceanospirillales; SAR86 clade; uncultured bacterium; uncultured bacterium
EU812980,1,1408	0	0.000137682	2.22755e-06	7.35928e-06	0	0	0	0	0	0	0	0	0	0	Bacteria; Proteobacteria; Alphaproteobacteria; Rhodobacterales; Rhodobacteraceae; Paracoccus
New,CleanUp,ReferenceOTU310360	5.88306e-06	8.38754e-05	2.22755e-05	3.18902e-05	0	3.06038e-06	0	0	0	0	0	0	0	0	Bacteria; Chloroflexi; SAR202 clade; uncultured bacterium; uncultured bacterium; uncultured bacterium; uncultured bacterium
New,ReferenceOTU980	2.20615e-05	2.69034e-05	5.90301e-05	3.06637e-05	0	8.16103e-06	0	0	0	0	0	0	0	0	Bacteria; Deferribacteres; Deferribacteres; Deferribacterales; SAR406 clade(Marine group A); uncultured bacterium; uncultured bacterium
EU803030,1,1375	4.70645e-05	2.53209e-05	1.11378e-06	6.99132e-05	0	3.06038e-06	0	0	0	0	0	0	0	0	Bacteria; Cyanobacteria; Cyanobacteria; SubsectionI; FamilyI; Prochlorococcus; uncultured bacterium
New,CleanUp,ReferenceOTU431818	2.20615e-05	6.80498e-05	4.78923e-05	7.35928e-06	0	1.02013e-06	0	0	0	0	0	0	0	0	Bacteria; Proteobacteria; Gammaproteobacteria; Oceanospirillales; Halomonadaceae; Halomonas
HQ672775,1,1495	7.35383e-06	0.000101283	2.22755e-06	3.31168e-05	0	2.04026e-06	0	0	0	0	0	0	0	0	Bacteria; Proteobacteria; Alphaproteobacteria; Rhodospirillales; AT-s3-44; uncultured bacterium; uncultured bacterium
GU145484,1,1471	1.61784e-05	8.07103e-05	2.33893e-05	2.20778e-05	0	3.06038e-06	0	0	0	0	0	0	0	0	Bacteria; Bacteroidetes; Sphingobacteriia; Sphingobacteriales; Saprospiraceae; uncultured; uncultured bacterium
New,CleanUp,ReferenceOTU896678	5.0006e-05	5.85545e-05	2.45031e-05	1.22655e-05	0	0	0	0	0	0	0	0	0	0	Bacteria; Chloroflexi; SAR202 clade; uncultured bacterium; uncultured bacterium; uncultured bacterium; uncultured bacterium
HQ673190,1,1521	3.38276e-05	5.53894e-05	2.89582e-05	2.6984e-05	0	0	0	0	0	0	0	0	0	0	Bacteria; Deferribacteres; Deferribacteres; Deferribacterales; PAUC34f; uncultured bacterium; uncultured bacterium
New,CleanUp,ReferenceOTU114676	2.94153e-06	6.96324e-05	1.0024e-05	6.25539e-05	0	0	0	0	0	0	0	0	0	0	Bacteria; Acidobacteria; Acidobacteria; Subgroup 21; uncultured bacterium; uncultured bacterium; uncultured bacterium
HQ673073,1,1246	3.23568e-05	7.12149e-05	2.56168e-05	1.59451e-05	0	0	0	0	0	0	0	0	0	0	Bacteria; Planctomycetes; BD7-11; uncultured bacterium; uncultured bacterium; uncultured bacterium; uncultured bacterium
New,CleanUp,ReferenceOTU359553	0.000101483	3.00685e-05	7.79643e-06	3.67964e-06	0	2.04026e-06	0	0	0	0	0	0	0	0	Bacteria; Proteobacteria; Gammaproteobacteria; Oceanospirillales; Halomonadaceae; Halomonas
New,CleanUp,ReferenceOTU734181	1.47077e-06	4.43115e-05	2.56168e-05	7.35928e-05	0	0	0	0	0	0	0	0	0	0	Bacteria; Proteobacteria; Alphaproteobacteria; Rhodospirillales; Rhodospirillaceae; AEGEAN-169 marine group; uncultured bacterium
EU491208,1,1485	3.52984e-05	5.22243e-05	4.23235e-05	9.81238e-06	0	5.10064e-06	0	0	0	0	0	0	0	0	Bacteria; Actinobacteria; Acidimicrobiia; Acidimicrobiales; OM1 clade; uncultured bacterium; uncultured bacterium
New,CleanUp,ReferenceOTU1077621	2.64738e-05	6.48847e-05	3.4527e-05	1.71717e-05	0	0	1.31993e-06	0	0	0	0	0	0	0	Unassigned
AM997826,1,1405	7.64798e-05	2.53209e-05	2.0048e-05	2.20778e-05	0	0	0	0	0	0	0	0	0	0	Bacteria; Proteobacteria; Gammaproteobacteria; Oceanospirillales; Oceanospirillaceae
New,CleanUp,ReferenceOTU752277	0	8.70405e-05	2.22755e-05	3.18902e-05	0	0	2.63985e-06	0	0	0	0	0	0	0	Bacteria; Chloroflexi; SAR202 clade; uncultured Chloroflexus sp,; uncultured Chloroflexus sp,; uncultured Chloroflexus sp,; uncultured Chloroflexus sp,
HQ673442,1,1509	4.26522e-05	3.00685e-05	3.34133e-05	3.55699e-05	0	2.04026e-06	0	0	0	0	0	0	0	0	Bacteria; Deferribacteres; Deferribacteres; Deferribacterales; SAR406 clade(Marine group A); uncultured bacterium; uncultured bacterium
AB630545,1,1430	5.14768e-05	3.00685e-05	2.67306e-05	3.06637e-05	0	4.08051e-06	0	0	0	0	0	0	0	0	Bacteria; Chloroflexi; Caldilineae; Caldilineales; Caldilineaceae; uncultured; uncultured bacterium
JN233014,1,1444	8.38336e-05	3.79813e-05	0	2.08513e-05	0	0	0	0	0	0	0	0	0	0	Bacteria; Bacteroidetes; Flavobacteriia; Flavobacteriales; Flavobacteriaceae; NS2b marine group
New,CleanUp,ReferenceOTU421816	1.47077e-06	0	4.4551e-06	0	0	7.1409e-06	0.000129353	0	0	0	0	0	0	0	Bacteria; Proteobacteria; Gammaproteobacteria; Thiotrichales; Piscirickettsiaceae; endosymbionts; uncultured bacterium
New,CleanUp,ReferenceOTU1079730	3.08861e-05	4.2729e-05	2.56168e-05	4.29291e-05	0	0	0	0	0	0	0	0	0	0	Bacteria
JX649916,1,1337	0	0.000131352	3.34133e-06	0	0	6.12077e-06	1.31993e-06	0	0	0	0	0	0	0	Bacteria; Proteobacteria; Gammaproteobacteria; Pseudomonadales; Pseudomonadaceae; Pseudomonas
New,CleanUp,ReferenceOTU1083412	5.14768e-05	1.26604e-05	7.79643e-05	0	0	0	0	0	0	0	0	0	0	0	Bacteria; Verrucomicrobia; OPB35 soil group; uncultured bacterium; uncultured bacterium; uncultured bacterium; uncultured bacterium
New,CleanUp,ReferenceOTU1097581	4.4123e-05	4.90592e-05	3.78684e-05	1.10389e-05	0	0	0	0	0	0	0	0	0	0	Unassigned
New,CleanUp,ReferenceOTU417967	2.94153e-05	5.38068e-05	4.12097e-05	1.59451e-05	0	0	1.31993e-06	0	0	0	0	0	0	0	Bacteria; Chloroflexi; SAR202 clade; uncultured bacterium; uncultured bacterium; uncultured bacterium; uncultured bacterium
JN233021,1,1446	7.94213e-05	4.74766e-05	0	1.47186e-05	0	0	0	0	0	0	0	0	0	0	Bacteria; Bacteroidetes; Flavobacteriia; Flavobacteriales; NS9 marine group
New,CleanUp,ReferenceOTU152960	3.08861e-05	5.22243e-05	4.23235e-05	1.59451e-05	0	0	0	0	0	0	0	0	0	0	Bacteria; Proteobacteria; Gammaproteobacteria; Salinisphaerales; Salinisphaeraceae; ZD0417 marine group; uncultured bacterium
JQ265817,1,1225	0	7.12149e-05	2.22755e-06	3.06637e-05	0	3.06038e-05	6.59963e-06	0	0	0	0	0	0	0	Bacteria; Proteobacteria; Gammaproteobacteria; Vibrionales; Vibrionaceae; Vibrio
New,CleanUp,ReferenceOTU888598	0	0.000131352	0	9.81238e-06	0	0	0	0	0	0	0	0	0	0	Bacteria; Planctomycetes; Planctomycetacia; Planctomycetales; Planctomycetaceae; Rhodopirellula; uncultured bacterium
New,CleanUp,ReferenceOTU46928	5.88306e-06	5.38068e-05	1.22515e-05	6.37804e-05	0	0	5.27971e-06	0	0	0	0	0	0	0	Bacteria; Proteobacteria; Gammaproteobacteria; E01-9C-26 marine group; uncultured gamma proteobacterium; uncultured gamma proteobacterium; uncultured gamma proteobacterium
New,CleanUp,ReferenceOTU633529	2.20615e-05	7.12149e-05	2.56168e-05	2.20778e-05	0	0	0	0	0	0	0	0	0	0	Bacteria; Proteobacteria; Deltaproteobacteria; Bdellovibrionales; Bdellovibrionaceae; OM27 clade; uncultured delta proteobacterium
New,CleanUp,ReferenceOTU800789	3.67691e-05	4.74766e-05	2.45031e-05	2.82106e-05	0	0	3.95978e-06	0	0	0	0	0	0	0	Bacteria; Chloroflexi; SAR202 clade; uncultured bacterium; uncultured bacterium; uncultured bacterium; uncultured bacterium
New,CleanUp,ReferenceOTU1060991	2.5003e-05	4.74766e-05	4.00959e-05	2.45309e-05	1.08473e-06	0	2.63985e-06	0	0	0	0	0	0	0	Bacteria; Deferribacteres; Deferribacteres; Deferribacterales; PAUC34f; uncultured bacterium; uncultured bacterium
New,CleanUp,ReferenceOTU830317	4.55937e-05	2.53209e-05	6.12577e-05	8.58583e-06	0	0	0	0	0	0	0	0	0	0	Bacteria; Chloroflexi; SAR202 clade
New,CleanUp,ReferenceOTU983914	4.70645e-05	7.27975e-05	1.22515e-05	8.58583e-06	0	0	0	0	0	0	0	0	0	0	Bacteria; Chloroflexi; TK10; uncultured bacterium; uncultured bacterium; uncultured bacterium; uncultured bacterium
AY375110,1,1445	3.97107e-05	3.63987e-05	4.78923e-05	4.90619e-06	0	6.12077e-06	5.27971e-06	0	0	0	0	0	0	0	Bacteria; Proteobacteria; Alphaproteobacteria; Sphingomonadales; Erythrobacteraceae; Altererythrobacter; uncultured organism
New,CleanUp,ReferenceOTU819201	1.76492e-05	9.17881e-05	0	3.06637e-05	0	0	0	0	0	0	0	0	0	0	Bacteria; Proteobacteria; Gammaproteobacteria; Xanthomonadales; JTB255 marine benthic group
New,CleanUp,ReferenceOTU443862	2.94153e-06	0	3.11857e-05	0	0	5.71272e-05	4.88373e-05	0	0	0	0	0	0	0	Bacteria; Proteobacteria; Gammaproteobacteria; Oceanospirillales
HQ672646,1,1481	3.08861e-05	3.32336e-05	2.78444e-05	4.41557e-05	0	0	3.95978e-06	0	0	0	0	0	0	0	Bacteria; Proteobacteria; Deltaproteobacteria; SAR324 clade(Marine group B); uncultured bacterium; uncultured bacterium; uncultured bacterium
AF468406,1,1482	8.53044e-05	1.4243e-05	4.00959e-05	0	0	0	0	0	0	0	0	0	0	0	Bacteria; Bacteroidetes; Flavobacteriia; Flavobacteriales; Flavobacteriaceae; Salegentibacter
New,CleanUp,ReferenceOTU500534	8.82459e-06	6.96324e-05	2.22755e-05	3.67964e-05	0	2.04026e-06	0	0	0	0	0	0	0	0	Bacteria; Chloroflexi; SAR202 clade; uncultured bacterium; uncultured bacterium; uncultured bacterium; uncultured bacterium
New,CleanUp,ReferenceOTU665090	4.26522e-05	5.38068e-05	2.78444e-05	7.35928e-06	0	5.10064e-06	2.63985e-06	0	0	0	0	0	0	0	Bacteria; Chloroflexi; SAR202 clade; uncultured bacterium; uncultured bacterium; uncultured bacterium; uncultured bacterium
New,CleanUp,ReferenceOTU1005379	2.05907e-05	8.38754e-05	1.11378e-05	2.33044e-05	0	0	0	0	0	0	0	0	0	0	Bacteria; Proteobacteria; Deltaproteobacteria; Bdellovibrionales; Bdellovibrionaceae; OM27 clade; uncultured bacterium
New,CleanUp,ReferenceOTU55221	4.85353e-05	2.21558e-05	5.56888e-06	6.13273e-05	0	0	1.31993e-06	0	0	0	0	0	0	0	Bacteria; Proteobacteria; Alphaproteobacteria; Rickettsiales; S25-593; uncultured bacterium; uncultured bacterium
EU802692,1,1286	3.38276e-05	7.27975e-05	0	2.6984e-05	0	0	5.27971e-06	0	0	0	0	0	0	0	Bacteria; Proteobacteria; Deltaproteobacteria; SAR324 clade(Marine group B); uncultured bacterium; uncultured bacterium; uncultured bacterium
New,ReferenceOTU845	9.26582e-05	1.10779e-05	3.00719e-05	4.90619e-06	0	0	0	0	0	0	0	0	0	0	Bacteria; Proteobacteria; Gammaproteobacteria; Oceanospirillales; SUP05 cluster
HQ673563,1,1480	5.58891e-05	0	7.90781e-05	3.67964e-06	0	0	0	0	0	0	0	0	0	0	Bacteria; Proteobacteria; Deltaproteobacteria; SAR324 clade(Marine group B); uncultured bacterium; uncultured bacterium; uncultured bacterium
New,CleanUp,ReferenceOTU891757	0	0.000125022	1.33653e-05	0	0	0	0	0	0	0	0	0	0	0	Bacteria; Proteobacteria; Gammaproteobacteria; Oceanospirillales; Halomonadaceae; Halomonas; uncultured bacterium
New,CleanUp,ReferenceOTU630254	2.35322e-05	6.0137e-05	3.11857e-05	2.33044e-05	0	0	0	0	0	0	0	0	0	0	Bacteria; Proteobacteria; Deltaproteobacteria; GR-WP33-30
New,CleanUp,ReferenceOTU328997	2.35322e-05	2.21558e-05	5.23474e-05	3.55699e-05	0	4.08051e-06	0	0	0	0	0	0	0	0	Bacteria; Proteobacteria; Deltaproteobacteria; Desulfuromonadales; GR-WP33-58; uncultured bacterium; uncultured bacterium
EU802457,1,1432	1.912e-05	0.000117109	0	1.22655e-06	0	0	0	0	0	0	0	0	0	0	Bacteria; Actinobacteria; Acidimicrobiia; Acidimicrobiales; OM1 clade; Candidatus Actinomarina; uncultured bacterium
New,CleanUp,ReferenceOTU141800	1.912e-05	8.07103e-05	2.22755e-05	7.35928e-06	0	0	7.91956e-06	0	0	0	0	0	0	0	Bacteria; Chloroflexi; SAR202 clade; uncultured bacterium; uncultured bacterium; uncultured bacterium; uncultured bacterium
KC001593,1,1290	5.14768e-05	2.8486e-05	4.78923e-05	7.35928e-06	0	2.04026e-06	0	0	0	0	0	0	0	0	Bacteria; Proteobacteria; Alphaproteobacteria; Rhodobacterales; Rhodobacteraceae; Roseobacter clade OCT lineage
New,CleanUp,ReferenceOTU48578	5.88306e-06	0.000109196	0	2.20778e-05	0	0	0	0	0	0	0	0	0	0	Bacteria; Chloroflexi; SAR202 clade
KF906601,1,1482	2.35322e-05	3.63987e-05	5.68026e-05	1.3492e-05	0	4.08051e-06	2.63985e-06	0	0	0	0	0	0	0	Bacteria; Proteobacteria; Alphaproteobacteria; Sphingomonadales; Erythrobacteraceae
New,CleanUp,ReferenceOTU395673	5.14768e-05	4.2729e-05	3.56408e-05	6.13273e-06	0	0	0	0	0	0	0	0	0	0	Unassigned
New,CleanUp,ReferenceOTU323256	1.61784e-05	6.64673e-05	2.78444e-05	1.71717e-05	0	4.08051e-06	3.95978e-06	0	0	0	0	0	0	0	Bacteria; Planctomycetes; Phycisphaerae; Phycisphaerales; Phycisphaeraceae; Phycisphaera; uncultured bacterium
AJ347054,1,1348	4.26522e-05	6.64673e-05	1.67066e-05	9.81238e-06	0	0	0	0	0	0	0	0	0	0	Bacteria; Proteobacteria; Alphaproteobacteria; Rhodospirillales; Rhodospirillaceae; Defluviicoccus; uncultured bacterium
JN233072,1,1476	5.14768e-05	2.53209e-05	2.33893e-05	3.31168e-05	0	2.04026e-06	0	0	0	0	0	0	0	0	Bacteria; Proteobacteria
HQ673330,1,1509	1.61784e-05	8.22928e-05	1.55929e-05	1.71717e-05	0	2.04026e-06	1.31993e-06	0	0	0	0	0	0	0	Bacteria; Planctomycetes; Planctomycetacia; Planctomycetales; Planctomycetaceae; uncultured
New,CleanUp,ReferenceOTU69367	2.94153e-06	6.0137e-05	1.33653e-05	5.64212e-05	0	0	1.31993e-06	0	0	0	0	0	0	0	Bacteria; Planctomycetes; Phycisphaerae; Phycisphaerales; Phycisphaeraceae; Phycisphaera; uncultured bacterium
New,CleanUp,ReferenceOTU1091118	7.05967e-05	0	1.0024e-05	1.83982e-05	0	2.44831e-05	1.05594e-05	0	0	0	0	0	0	0	Bacteria; Proteobacteria; Gammaproteobacteria; Oceanospirillales; SUP05 cluster; uncultured bacterium; uncultured bacterium
New,CleanUp,ReferenceOTU65234	1.47077e-05	0	0.00010024	0	0	1.63221e-05	2.63985e-06	0	0	0	0	0	0	0	Bacteria; Proteobacteria; Gammaproteobacteria; Alteromonadales; Alteromonadaceae; Marinobacter; uncultured Halomonas sp,
New,ReferenceOTU2323	8.82459e-06	8.70405e-05	1.55929e-05	2.20778e-05	0	0	0	0	0	0	0	0	0	0	Bacteria; Proteobacteria; Deltaproteobacteria; GR-WP33-30; uncultured delta proteobacterium; uncultured delta proteobacterium; uncultured delta proteobacterium
New,CleanUp,ReferenceOTU49670	3.08861e-05	3.48162e-05	2.22755e-05	3.92495e-05	0	2.04026e-06	3.95978e-06	0	0	0	0	0	0	0	Bacteria; Chloroflexi; SAR202 clade; uncultured bacterium; uncultured bacterium; uncultured bacterium; uncultured bacterium
New,CleanUp,ReferenceOTU785771	6.32429e-05	1.4243e-05	3.22995e-05	2.33044e-05	0	0	0	0	0	0	0	0	0	0	Bacteria; Chloroflexi; SAR202 clade; uncultured bacterium; uncultured bacterium; uncultured bacterium; uncultured bacterium
New,CleanUp,ReferenceOTU699064	1.47077e-05	5.22243e-05	2.78444e-05	3.8023e-05	0	0	0	0	0	0	0	0	0	0	Bacteria; Chloroflexi; SAR202 clade; uncultured bacterium; uncultured bacterium; uncultured bacterium; uncultured bacterium
EU795187,10284,11783	1.32369e-05	6.17196e-05	1.11378e-05	4.66088e-05	0	0	0	0	0	0	0	0	0	0	Bacteria; Chloroflexi; SAR202 clade
New,CleanUp,ReferenceOTU768105	1.912e-05	7.12149e-05	6.68265e-06	3.55699e-05	0	0	0	0	0	0	0	0	0	0	Bacteria; Chloroflexi; SAR202 clade
GQ076362,1,1360	8.67752e-05	4.2729e-05	0	0	0	3.06038e-06	0	0	0	0	0	0	0	0	Bacteria; Proteobacteria; Gammaproteobacteria; Pseudomonadales; Moraxellaceae; Alkanindiges; uncultured bacterium
New,CleanUp,ReferenceOTU483131	1.17661e-05	5.06417e-05	3.4527e-05	3.55699e-05	0	0	0	0	0	0	0	0	0	0	Bacteria; Candidate division OD1; uncultured bacterium; uncultured bacterium; uncultured bacterium; uncultured bacterium; uncultured bacterium
HQ674396,1,1485	5.44183e-05	3.48162e-05	3.34133e-05	9.81238e-06	0	0	0	0	0	0	0	0	0	0	Bacteria; Bacteroidetes; Flavobacteriia; Flavobacteriales; NS9 marine group; uncultured bacterium; uncultured bacterium
New,CleanUp,ReferenceOTU264033	3.67691e-05	4.43115e-05	5.12337e-05	0	0	0	0	0	0	0	0	0	0	0	Bacteria; Proteobacteria; Gammaproteobacteria; Oceanospirillales; Halomonadaceae; Halomonas; uncultured organism
New,CleanUp,ReferenceOTU54366	6.47137e-05	3.00685e-05	2.78444e-05	8.58583e-06	0	1.02013e-06	0	0	0	0	0	0	0	0	Bacteria; Chloroflexi; SAR202 clade
New,CleanUp,ReferenceOTU469584	0	9.33707e-05	2.22755e-06	3.43433e-05	0	2.04026e-06	0	0	0	0	0	0	0	0	Bacteria; Acidobacteria; Acidobacteria; Subgroup 21; uncultured bacterium; uncultured bacterium; uncultured bacterium
AB166997,1,1462	8.82459e-06	6.96324e-05	3.11857e-05	1.22655e-05	0	4.08051e-06	5.27971e-06	0	0	0	0	0	0	0	Bacteria; Proteobacteria; Gammaproteobacteria; Oceanospirillales; Alcanivoracaceae; Alcanivorax
AMWC01000015,440,1881	2.94153e-06	0	0	0	0	5.30467e-05	7.52358e-05	0	0	0	0	0	0	0	Bacteria; Proteobacteria; Alphaproteobacteria; Rhodobacterales; Rhodobacteraceae; Yangia
New,CleanUp,ReferenceOTU327384	0	1.58255e-06	0	0	0	3.9785e-05	8.9755e-05	0	0	0	0	0	0	0	Bacteria; Proteobacteria; Epsilonproteobacteria; Campylobacterales; Helicobacteraceae; Sulfurovum; uncultured bacterium
New,CleanUp,ReferenceOTU646399	8.23629e-05	1.89906e-05	2.11617e-05	6.13273e-06	0	2.04026e-06	0	0	0	0	0	0	0	0	Bacteria; Proteobacteria; Gammaproteobacteria; Oceanospirillales; SUP05 cluster; uncultured bacterium; uncultured bacterium
New,CleanUp,ReferenceOTU139246	1.02954e-05	7.12149e-05	1.11378e-05	3.67964e-05	0	1.02013e-06	0	0	0	0	0	0	0	0	Bacteria; Chloroflexi; SAR202 clade; uncultured Chloroflexi bacterium; uncultured Chloroflexi bacterium; uncultured Chloroflexi bacterium; uncultured Chloroflexi bacterium
New,CleanUp,ReferenceOTU691277	3.23568e-05	5.85545e-05	3.34133e-05	6.13273e-06	0	0	0	0	0	0	0	0	0	0	Bacteria; Chloroflexi; SAR202 clade; uncultured bacterium; uncultured bacterium; uncultured bacterium; uncultured bacterium
GU062019,1,1504	4.26522e-05	8.38754e-05	0	3.67964e-06	0	0	0	0	0	0	0	0	0	0	Bacteria; Verrucomicrobia; Verrucomicrobiae; Verrucomicrobiales; Verrucomicrobiaceae; Roseibacillus; uncultured bacterium
New,CleanUp,ReferenceOTU999586	0	9.17881e-05	0	3.8023e-05	0	0	0	0	0	0	0	0	0	0	Unassigned
New,CleanUp,ReferenceOTU120546	4.4123e-05	0	7.57367e-05	9.81238e-06	0	0	0	0	0	0	0	0	0	0	Bacteria; Proteobacteria; Gammaproteobacteria; Alteromonadales; Idiomarinaceae; Idiomarina; uncultured bacterium
New,ReferenceOTU1319	7.35383e-06	8.07103e-05	0	4.0476e-05	0	1.02013e-06	0	0	0	0	0	0	0	0	Bacteria; Spirochaetae; Spirochaetes; Spirochaetales; Spirochaetaceae; Spirochaeta
New,ReferenceOTU1784	0.000129427	0	0	0	0	0	0	0	0	0	0	0	0	0	Bacteria; Bacteroidetes; Flavobacteriia; Flavobacteriales; Flavobacteriaceae; Salegentibacter
EF572383,1,1474	2.64738e-05	5.22243e-05	2.67306e-05	2.08513e-05	0	3.06038e-06	0	0	0	0	0	0	0	0	Bacteria; Proteobacteria; Gammaproteobacteria; Oceanospirillales; Halomonadaceae; Halomonas; uncultured Halomonas sp,
New,ReferenceOTU2114	0	9.81183e-05	1.0024e-05	2.08513e-05	0	0	0	0	0	0	0	0	0	0	Bacteria; Acidobacteria; Acidobacteria; Subgroup 9; uncultured bacterium; uncultured bacterium; uncultured bacterium
GU940733,1,1337	2.64738e-05	3.16511e-06	1.78204e-05	6.62335e-05	0	1.42818e-05	0	0	0	0	0	0	0	0	Bacteria; Proteobacteria; Gammaproteobacteria; Alteromonadales; Alteromonadaceae; Alteromonas
New,CleanUp,ReferenceOTU637812	2.94153e-05	1.58255e-06	9.68985e-05	0	0	0	0	0	0	0	0	0	0	0	Bacteria; Proteobacteria; Alphaproteobacteria; Sphingomonadales; Erythrobacteraceae; Erythrobacter; uncultured bacterium
New,CleanUp,ReferenceOTU558354	2.35322e-05	4.74766e-05	3.56408e-05	1.96248e-05	0	1.02013e-06	0	0	0	0	0	0	0	0	Bacteria; Planctomycetes; Planctomycetacia; Planctomycetales; Planctomycetaceae; Rhodopirellula; uncultured bacterium
New,CleanUp,ReferenceOTU575575	2.05907e-05	9.49532e-06	7.68505e-05	1.22655e-05	0	6.12077e-06	1.31993e-06	0	0	0	0	0	0	0	Unassigned
New,ReferenceOTU1552	2.64738e-05	1.26604e-05	4.4551e-05	4.29291e-05	0	0	0	0	0	0	0	0	0	0	Bacteria; Chloroflexi; SAR202 clade; uncultured bacterium; uncultured bacterium; uncultured bacterium; uncultured bacterium
HQ727637,1,1484	1.76492e-05	4.2729e-05	5.4575e-05	8.58583e-06	0	3.06038e-06	0	0	0	0	0	0	0	0	Bacteria; Acidobacteria; Acidobacteria; Subgroup 3; PAUC26f; uncultured Acidobacteria bacterium; uncultured Acidobacteria bacterium
New,CleanUp,ReferenceOTU12499	4.4123e-05	3.48162e-05	2.78444e-05	1.96248e-05	0	0	0	0	0	0	0	0	0	0	Bacteria; Verrucomicrobia; Opitutae; MB11C04 marine group; uncultured bacterium; uncultured bacterium; uncultured bacterium
EU804076,1,1422	8.23629e-05	1.58255e-05	0	2.82106e-05	0	0	0	0	0	0	0	0	0	0	Bacteria; Verrucomicrobia; Opitutae; MB11C04 marine group; uncultured bacterium; uncultured bacterium; uncultured bacterium
New,CleanUp,ReferenceOTU1118010	1.47077e-05	5.53894e-05	4.00959e-05	1.59451e-05	0	0	0	0	0	0	0	0	0	0	Bacteria; Cyanobacteria; ML635J-21; uncultured marine bacterium; uncultured marine bacterium; uncultured marine bacterium; uncultured marine bacterium
New,CleanUp,ReferenceOTU764770	4.4123e-05	1.58255e-06	6.90541e-05	0	0	1.12214e-05	0	0	0	0	0	0	0	0	Unassigned
New,CleanUp,ReferenceOTU717640	2.94153e-05	2.53209e-05	1.33653e-05	5.64212e-05	0	0	1.31993e-06	0	0	0	0	0	0	0	Bacteria; NPL-UPA2; uncultured bacterium; uncultured bacterium; uncultured bacterium; uncultured bacterium; uncultured bacterium
New,CleanUp,ReferenceOTU154697	1.17661e-05	9.81183e-05	0	1.59451e-05	0	0	0	0	0	0	0	0	0	0	Bacteria; Acidobacteria; Acidobacteria; Subgroup 6
New,CleanUp,ReferenceOTU952033	2.94153e-06	9.33707e-05	0	2.94371e-05	0	0	0	0	0	0	0	0	0	0	Bacteria; Acidobacteria; Acidobacteria; Subgroup 6; uncultured bacterium; uncultured bacterium; uncultured bacterium
HQ163690,1,1369	5.0006e-05	2.05732e-05	3.56408e-05	1.83982e-05	0	1.02013e-06	0	0	0	0	0	0	0	0	Bacteria; Proteobacteria; Deltaproteobacteria; SAR324 clade(Marine group B); uncultured delta proteobacterium; uncultured delta proteobacterium; uncultured delta proteobacterium
New,CleanUp,ReferenceOTU429855	2.5003e-05	5.06417e-05	2.56168e-05	2.33044e-05	0	1.02013e-06	0	0	0	0	0	0	0	0	Bacteria; Chloroflexi; SAR202 clade
KC682727,1,1500	8.08921e-05	1.10779e-05	2.0048e-05	1.3492e-05	0	0	0	0	0	0	0	0	0	0	Bacteria; Proteobacteria; Gammaproteobacteria; Oceanospirillales; SUP05 cluster
New,CleanUp,ReferenceOTU702306	1.47077e-05	5.53894e-05	1.0024e-05	4.53822e-05	0	0	0	0	0	0	0	0	0	0	Bacteria; Acidobacteria; Acidobacteria; Subgroup 21; uncultured bacterium; uncultured bacterium; uncultured bacterium
New,CleanUp,ReferenceOTU1109969	1.47077e-06	8.70405e-05	8.9102e-06	2.45309e-05	0	2.04026e-06	1.31993e-06	0	0	0	0	0	0	0	Bacteria; Planctomycetes; Phycisphaerae; Phycisphaerales; Phycisphaeraceae; Phycisphaera; uncultured bacterium
New,CleanUp,ReferenceOTU162686	2.5003e-05	3.00685e-05	5.79163e-05	1.22655e-05	0	0	0	0	0	0	0	0	0	0	Bacteria; Chloroflexi; SAR202 clade
New,CleanUp,ReferenceOTU194571	4.4123e-05	3.63987e-05	1.89342e-05	2.57575e-05	0	0	0	0	0	0	0	0	0	0	Bacteria; Chloroflexi; SAR202 clade; uncultured bacterium; uncultured bacterium; uncultured bacterium; uncultured bacterium
New,CleanUp,ReferenceOTU263248	3.67691e-05	4.90592e-05	7.79643e-06	2.94371e-05	0	2.04026e-06	0	0	0	0	0	0	0	0	Bacteria; Chloroflexi; SAR202 clade; uncultured bacterium; uncultured bacterium; uncultured bacterium; uncultured bacterium
New,ReferenceOTU2425	0	8.22928e-05	3.34133e-06	3.92495e-05	0	0	0	0	0	0	0	0	0	0	Bacteria; Planctomycetes; Pla3 lineage; uncultured bacterium; uncultured bacterium; uncultured bacterium; uncultured bacterium
AACY020018870,263,1547	6.03014e-05	3.95638e-05	0	1.59451e-05	0	6.12077e-06	2.63985e-06	0	0	0	0	0	0	0	Bacteria; Proteobacteria; Gammaproteobacteria; Oceanospirillales; SAR86 clade; uncultured marine bacterium; uncultured marine bacterium
New,CleanUp,ReferenceOTU1130651	6.61845e-05	4.2729e-05	4.4551e-06	1.10389e-05	0	0	0	0	0	0	0	0	0	0	Bacteria
New,ReferenceOTU1864	3.08861e-05	5.53894e-05	3.67546e-05	1.22655e-06	0	0	0	0	0	0	0	0	0	0	Bacteria; Proteobacteria; Gammaproteobacteria; Oceanospirillales; Halomonadaceae; Halomonas
EU802798,1,1422	5.0006e-05	4.58941e-05	0	2.82106e-05	0	0	0	0	0	0	0	0	0	0	Bacteria; Bacteroidetes; Flavobacteriia; Flavobacteriales; Flavobacteriaceae
HM598135,1,1457	5.88306e-06	9.17881e-05	5.56888e-06	2.08513e-05	0	0	0	0	0	0	0	0	0	0	Bacteria; Proteobacteria; Alphaproteobacteria; Rhizobiales; Rhodobiaceae; Rhodobium
JX879059,1,1438	1.76492e-05	5.06417e-05	1.55929e-05	3.43433e-05	0	0	5.27971e-06	0	0	0	0	0	0	0	Bacteria; Proteobacteria; Alphaproteobacteria; SAR11 clade; Deep 1
New,CleanUp,ReferenceOTU673188	0	0.000102866	2.22755e-06	1.83982e-05	0	0	0	0	0	0	0	0	0	0	Bacteria; Planctomycetes; Planctomycetacia; Planctomycetales; Planctomycetaceae; Rhodopirellula
New,CleanUp,ReferenceOTU833234	2.79445e-05	3.63987e-05	2.89582e-05	2.82106e-05	0	0	1.31993e-06	0	0	0	0	0	0	0	Bacteria; Chloroflexi; SAR202 clade; uncultured Chloroflexi bacterium; uncultured Chloroflexi bacterium; uncultured Chloroflexi bacterium; uncultured Chloroflexi bacterium
New,CleanUp,ReferenceOTU535718	7.35383e-06	8.22928e-05	1.67066e-05	1.22655e-05	0	0	3.95978e-06	0	0	0	0	0	0	0	Unassigned
GQ350131,1,1331	2.79445e-05	4.58941e-05	3.00719e-05	1.71717e-05	0	0	1.31993e-06	0	0	0	0	0	0	0	Bacteria; Proteobacteria; Alphaproteobacteria; Rhodospirillales; Rhodospirillaceae; Defluviicoccus
New,ReferenceOTU1338	7.35383e-06	6.33022e-05	7.79643e-06	4.29291e-05	0	1.02013e-06	0	0	0	0	0	0	0	0	Bacteria; Proteobacteria; Deltaproteobacteria; Myxococcales; uncultured
New,CleanUp,ReferenceOTU459648	1.912e-05	5.06417e-05	1.78204e-05	2.82106e-05	0	0	6.59963e-06	0	0	0	0	0	0	0	Bacteria; Chloroflexi; SAR202 clade
EU035931,1,1482	1.61784e-05	8.70405e-05	6.68265e-06	1.22655e-05	0	0	0	0	0	0	0	0	0	0	Bacteria; Acidobacteria; Acidobacteria; Subgroup 3; PAUC26f; uncultured Acidobacteria bacterium; uncultured Acidobacteria bacterium
AACY020443682,520,1932	3.38276e-05	8.07103e-05	0	4.90619e-06	0	0	2.63985e-06	0	0	0	0	0	0	0	Bacteria; Proteobacteria; Alphaproteobacteria; OCS116 clade
GQ337248,1,1482	2.5003e-05	6.17196e-05	1.55929e-05	1.96248e-05	0	0	0	0	0	0	0	0	0	0	Bacteria; Acidobacteria; Acidobacteria; Subgroup 21
New,CleanUp,ReferenceOTU209098	0	0.000101283	2.22755e-06	1.83982e-05	0	0	0	0	0	0	0	0	0	0	Bacteria; Planctomycetes; Phycisphaerae; Phycisphaerales; Phycisphaeraceae; Phycisphaera; uncultured bacterium
New,CleanUp,ReferenceOTU5382	5.88306e-05	4.74766e-06	4.78923e-05	0	0	1.02013e-05	0	0	0	0	0	0	0	0	Bacteria; Planctomycetes; OM190; uncultured bacterium; uncultured bacterium; uncultured bacterium; uncultured bacterium
GQ351193,1,1447	6.03014e-05	2.05732e-05	2.67306e-05	1.10389e-05	0	0	2.63985e-06	0	0	0	0	0	0	0	Bacteria; Proteobacteria; Alphaproteobacteria; SAR11 clade; Surface 1
New,ReferenceOTU502	1.912e-05	7.27975e-05	1.33653e-05	1.59451e-05	0	0	0	0	0	0	0	0	0	0	Bacteria; Proteobacteria; Deltaproteobacteria; Bdellovibrionales; Bdellovibrionaceae; OM27 clade; uncultured delta proteobacterium
EF572435,1,1502	7.20675e-05	4.43115e-05	0	2.45309e-06	0	1.02013e-06	1.31993e-06	0	0	0	0	0	0	0	Bacteria; Bacteroidetes; Flavobacteriia; Flavobacteriales; Flavobacteriaceae; NS5 marine group; uncultured bacterium
JN977183,1,1526	0	8.54579e-05	0	3.55699e-05	0	0	0	0	0	0	0	0	0	0	Bacteria; Planctomycetes; Planctomycetacia; Planctomycetales; Planctomycetaceae; Rhodopirellula; uncultured bacterium
New,CleanUp,ReferenceOTU1122119	4.4123e-06	6.17196e-05	1.11378e-05	4.17026e-05	0	2.04026e-06	0	0	0	0	0	0	0	0	Bacteria; Chloroflexi; SAR202 clade; uncultured bacterium; uncultured bacterium; uncultured bacterium; uncultured bacterium
New,CleanUp,ReferenceOTU518141	8.23629e-05	1.26604e-05	2.11617e-05	3.67964e-06	0	1.02013e-06	0	0	0	0	0	0	0	0	Bacteria; Chloroflexi; SAR202 clade; uncultured bacterium; uncultured bacterium; uncultured bacterium; uncultured bacterium
JQ678350,1,1474	2.5003e-05	3.48162e-05	3.89821e-05	2.20778e-05	0	0	0	0	0	0	0	0	0	0	Bacteria; Proteobacteria; Deltaproteobacteria; Bdellovibrionales; Bdellovibrionaceae; OM27 clade; uncultured bacterium
HQ154008,1,1349	5.44183e-05	0	1.0024e-05	0	0	1.02013e-05	4.61974e-05	0	0	0	0	0	0	0	Bacteria; Proteobacteria; Alphaproteobacteria; Rhodobacterales; Rhodobacteraceae; Ruegeria
KC294763,1,1318	1.61784e-05	1.10779e-05	8.46469e-05	4.90619e-06	0	0	3.95978e-06	0	0	0	0	0	0	0	Bacteria; Actinobacteria; Acidimicrobiia; Acidimicrobiales; Sva0996 marine group; uncultured bacterium; uncultured bacterium
New,CleanUp,ReferenceOTU690811	7.94213e-05	0	1.55929e-05	1.22655e-05	0	8.16103e-06	5.27971e-06	0	0	0	0	0	0	0	Bacteria; Proteobacteria; Gammaproteobacteria; Alteromonadales; Alteromonadaceae; Alteromonas
New,CleanUp,ReferenceOTU175390	0	8.38754e-05	0	3.67964e-05	0	0	0	0	0	0	0	0	0	0	Bacteria; Proteobacteria; Deltaproteobacteria; GR-WP33-30; uncultured bacterium; uncultured bacterium; uncultured bacterium
New,CleanUp,ReferenceOTU69621	1.47077e-06	6.17196e-05	4.4551e-06	5.02884e-05	0	0	2.63985e-06	0	0	0	0	0	0	0	Bacteria; Chloroflexi; SAR202 clade
KF286046,1,1375	1.61784e-05	5.22243e-05	1.89342e-05	3.31168e-05	0	0	0	0	0	0	0	0	0	0	Bacteria; Actinobacteria; Acidimicrobiia; Acidimicrobiales; Sva0996 marine group; uncultured actinobacterium; uncultured actinobacterium
New,CleanUp,ReferenceOTU926894	2.94153e-05	5.06417e-05	4.4551e-06	3.06637e-05	2.16947e-06	3.06038e-06	0	0	0	0	0	0	0	0	Bacteria; Chloroflexi; SAR202 clade; uncultured Chloroflexi bacterium; uncultured Chloroflexi bacterium; uncultured Chloroflexi bacterium; uncultured Chloroflexi bacterium
EU259798,1,1444	4.55937e-05	5.22243e-05	0	2.08513e-05	0	0	1.31993e-06	0	0	0	0	0	0	0	Bacteria; Proteobacteria; Alphaproteobacteria; Rhodobacterales; Rhodobacteraceae
HM798805,1,1416	7.5009e-05	7.91277e-06	3.4527e-05	2.45309e-06	0	0	0	0	0	0	0	0	0	0	Bacteria; Proteobacteria; Alphaproteobacteria; Rhodospirillales; Rhodospirillaceae; uncultured; uncultured bacterium
New,CleanUp,ReferenceOTU1059876	4.70645e-05	5.22243e-05	1.78204e-05	2.45309e-06	0	0	0	0	0	0	0	0	0	0	Bacteria; Proteobacteria; Gammaproteobacteria; Oceanospirillales; Halomonadaceae; Halomonas
New,CleanUp,ReferenceOTU469365	0	8.38754e-05	2.33893e-05	1.22655e-05	0	0	0	0	0	0	0	0	0	0	Bacteria; Planctomycetes; Planctomycetacia; Planctomycetales; Planctomycetaceae; Pir4 lineage; uncultured bacterium
JX227351,1,1504	5.88306e-06	6.96324e-05	1.78204e-05	2.08513e-05	0	0	5.27971e-06	0	0	0	0	0	0	0	Bacteria; Acidobacteria; Subgroup 26; uncultured bacterium; uncultured bacterium; uncultured bacterium; uncultured bacterium
New,CleanUp,ReferenceOTU1034612	4.4123e-05	5.22243e-05	1.55929e-05	7.35928e-06	0	0	0	0	0	0	0	0	0	0	Bacteria; Chloroflexi; SAR202 clade; uncultured bacterium; uncultured bacterium; uncultured bacterium; uncultured bacterium
DQ396294,1,1513	5.88306e-06	8.38754e-05	0	2.94371e-05	0	0	0	0	0	0	0	0	0	0	Bacteria; Verrucomicrobia; Arctic97B-4 marine group
New,CleanUp,ReferenceOTU829507	0	9.33707e-05	0	2.57575e-05	0	0	0	0	0	0	0	0	0	0	Bacteria; Planctomycetes; Phycisphaerae; Phycisphaerales; Phycisphaeraceae; Phycisphaera
New,CleanUp,ReferenceOTU416396	3.97107e-05	4.43115e-05	1.78204e-05	1.71717e-05	0	0	0	0	0	0	0	0	0	0	Bacteria; Chloroflexi; SAR202 clade; uncultured Chloroflexi bacterium; uncultured Chloroflexi bacterium; uncultured Chloroflexi bacterium; uncultured Chloroflexi bacterium
New,CleanUp,ReferenceOTU791511	1.912e-05	1.89906e-05	3.11857e-05	4.66088e-05	0	3.06038e-06	0	0	0	0	0	0	0	0	Bacteria; Deferribacteres; Deferribacteres; Deferribacterales; SAR406 clade(Marine group A)
FN553512,1,1521	2.5003e-05	4.43115e-05	6.68265e-06	4.29291e-05	0	0	0	0	0	0	0	0	0	0	Bacteria; Proteobacteria; Deltaproteobacteria; GR-WP33-30; uncultured bacterium; uncultured bacterium; uncultured bacterium
New,CleanUp,ReferenceOTU522530	3.97107e-05	1.58255e-05	3.00719e-05	2.82106e-05	0	5.10064e-06	0	0	0	0	0	0	0	0	Bacteria; Proteobacteria; Alphaproteobacteria; Rhodospirillales; Rhodospirillaceae; uncultured
New,CleanUp,ReferenceOTU181376	4.11814e-05	3.79813e-05	3.22995e-05	7.35928e-06	0	0	0	0	0	0	0	0	0	0	Bacteria; Proteobacteria; Alphaproteobacteria; SAR11 clade; Surface 1; uncultured bacterium; uncultured bacterium
New,ReferenceOTU1875	1.32369e-05	0	2.22755e-06	8.58583e-06	0	7.75297e-05	1.7159e-05	0	0	0	0	0	0	0	Unassigned
EF574119,1,1500	4.70645e-05	3.00685e-05	3.34133e-06	3.31168e-05	0	5.10064e-06	0	0	0	0	0	0	0	0	Bacteria; Deferribacteres; Deferribacteres; Deferribacterales; SAR406 clade(Marine group A); uncultured bacterium; uncultured bacterium
HQ326404,1,1460	4.70645e-05	3.95638e-05	1.11378e-05	2.08513e-05	0	0	0	0	0	0	0	0	0	0	Bacteria; Proteobacteria; Alphaproteobacteria; Rhodospirillales; Rhodospirillaceae; uncultured; uncultured bacterium
New,CleanUp,ReferenceOTU602924	7.35383e-06	5.22243e-05	1.55929e-05	4.17026e-05	0	1.02013e-06	0	0	0	0	0	0	0	0	Bacteria; Chloroflexi; SAR202 clade; uncultured bacterium; uncultured bacterium; uncultured bacterium; uncultured bacterium
New,CleanUp,ReferenceOTU691671	2.20615e-05	3.95638e-05	4.12097e-05	1.47186e-05	0	0	0	0	0	0	0	0	0	0	Bacteria; Proteobacteria; Deltaproteobacteria; Myxococcales; uncultured; uncultured bacterium; uncultured bacterium
New,CleanUp,ReferenceOTU761418	1.61784e-05	5.22243e-05	2.45031e-05	2.45309e-05	0	0	0	0	0	0	0	0	0	0	Bacteria; Lentisphaerae; Oligosphaeria; uncultured bacterium; uncultured bacterium; uncultured bacterium; uncultured bacterium
New,CleanUp,ReferenceOTU755793	1.47077e-06	0	0	0	0	4.59058e-05	6.99561e-05	0	0	0	0	0	0	0	Bacteria; BD1-5; uncultured bacterium; uncultured bacterium; uncultured bacterium; uncultured bacterium; uncultured bacterium
New,ReferenceOTU136	5.73599e-05	1.10779e-05	1.67066e-05	2.82106e-05	0	0	3.95978e-06	0	0	0	0	0	0	0	Bacteria; Proteobacteria; Deltaproteobacteria; SAR324 clade(Marine group B); uncultured bacterium; uncultured bacterium; uncultured bacterium
New,CleanUp,ReferenceOTU1047622	7.20675e-05	4.74766e-06	3.4527e-05	2.45309e-06	0	2.04026e-06	1.31993e-06	0	0	0	0	0	0	0	Bacteria; Deferribacteres; Deferribacteres; Deferribacterales; SAR406 clade(Marine group A); uncultured bacterium; uncultured bacterium
New,CleanUp,ReferenceOTU325176	2.79445e-05	5.06417e-05	2.33893e-05	9.81238e-06	0	5.10064e-06	0	0	0	0	0	0	0	0	Bacteria; Acidobacteria; Acidobacteria; Subgroup 3; PAUC26f
New,CleanUp,ReferenceOTU575365	2.20615e-05	4.90592e-05	2.11617e-05	2.08513e-05	0	3.06038e-06	0	0	0	0	0	0	0	0	Unassigned
FJ745076,1,1324	5.88306e-05	3.32336e-05	0	2.08513e-05	0	3.06038e-06	0	0	0	0	0	0	0	0	Bacteria; Proteobacteria; Alphaproteobacteria; OCS116 clade; uncultured bacterium; uncultured bacterium; uncultured bacterium
JQ678431,1,1528	2.94153e-06	4.74766e-05	6.68265e-06	5.88743e-05	0	0	0	0	0	0	0	0	0	0	Bacteria; Deferribacteres; Deferribacteres; Deferribacterales; SAR406 clade(Marine group A); uncultured bacterium; uncultured bacterium
New,CleanUp,ReferenceOTU978817	3.38276e-05	4.90592e-05	2.56168e-05	7.35928e-06	0	0	0	0	0	0	0	0	0	0	Bacteria; Deferribacteres; Deferribacteres; Deferribacterales; SAR406 clade(Marine group A); uncultured bacterium; uncultured bacterium
New,CleanUp,ReferenceOTU1106063	4.4123e-05	3.32336e-05	2.11617e-05	1.71717e-05	0	0	0	0	0	0	0	0	0	0	Bacteria; Chloroflexi; SAR202 clade
New,CleanUp,ReferenceOTU795736	1.912e-05	4.90592e-05	1.55929e-05	3.18902e-05	0	0	0	0	0	0	0	0	0	0	Bacteria; Deferribacteres; Deferribacteres; Deferribacterales; SAR406 clade(Marine group A); uncultured bacterium; uncultured bacterium
New,CleanUp,ReferenceOTU576971	1.76492e-05	1.10779e-05	8.01918e-05	3.67964e-06	0	3.06038e-06	0	0	0	0	0	0	0	0	Archaea; Euryarchaeota; Halobacteria; Halobacteriales; Deep Sea Hydrothermal Vent Gp 6(DHVEG-6); uncultured euryarchaeote; uncultured euryarchaeote
New,CleanUp,ReferenceOTU318455	4.85353e-05	3.00685e-05	1.11378e-06	3.55699e-05	0	0	0	0	0	0	0	0	0	0	Unassigned
New,CleanUp,ReferenceOTU628776	5.58891e-05	7.91277e-06	2.56168e-05	2.57575e-05	0	0	0	0	0	0	0	0	0	0	Bacteria; Proteobacteria; Deltaproteobacteria; Desulfuromonadales; GR-WP33-58; uncultured bacterium; uncultured bacterium
EU491583,1,1396	1.76492e-05	6.48847e-05	1.67066e-05	7.35928e-06	0	7.1409e-06	1.31993e-06	0	0	0	0	0	0	0	Bacteria; Actinobacteria; Acidimicrobiia; Acidimicrobiales; Sva0996 marine group; uncultured actinobacterium; uncultured actinobacterium
DQ156461,1,1264	1.32369e-05	5.85545e-05	2.22755e-05	2.08513e-05	0	0	0	0	0	0	0	0	0	0	Archaea; Euryarchaeota; Thermoplasmata; Thermoplasmatales; Marine Group II
New,CleanUp,ReferenceOTU438741	3.23568e-05	1.4243e-05	2.11617e-05	0	0	3.06038e-06	4.35576e-05	0	0	0	0	0	0	0	Bacteria; Proteobacteria; Gammaproteobacteria; Oceanospirillales; Alcanivoracaceae; Alcanivorax
New,CleanUp,ReferenceOTU906406	1.32369e-05	4.43115e-05	1.44791e-05	7.35928e-06	0	2.04026e-05	1.45192e-05	0	0	0	0	0	0	0	Bacteria; Proteobacteria; Alphaproteobacteria; Rhodobacterales; Rhodobacteraceae; Yangia
New,CleanUp,ReferenceOTU652685	5.0006e-05	3.95638e-05	1.33653e-05	9.81238e-06	0	1.02013e-06	0	0	0	0	0	0	0	0	Unassigned
AM111093,1,1491	3.67691e-05	4.58941e-05	1.44791e-05	1.3492e-05	0	3.06038e-06	0	0	0	0	0	0	0	0	Bacteria; Proteobacteria; Gammaproteobacteria; Oceanospirillales; Halomonadaceae; Halomonas; uncultured Halomonas sp,
HQ672464,1,1524	1.912e-05	3.00685e-05	3.11857e-05	2.45309e-05	0	6.12077e-06	2.63985e-06	0	0	0	0	0	0	0	Bacteria; Deferribacteres; Deferribacteres; Deferribacterales; SAR406 clade(Marine group A); uncultured bacterium; uncultured bacterium
New,CleanUp,ReferenceOTU593726	1.47077e-06	7.438e-05	3.34133e-06	3.43433e-05	0	0	0	0	0	0	0	0	0	0	Bacteria; Spirochaetae; Spirochaetes; Spirochaetales; Spirochaetaceae; Spirochaeta; uncultured Spirochaetes bacterium
FJ810551,1,1466	3.67691e-05	3.63987e-05	2.56168e-05	1.47186e-05	0	0	0	0	0	0	0	0	0	0	Bacteria; Chloroflexi; SAR202 clade; uncultured bacterium; uncultured bacterium; uncultured bacterium; uncultured bacterium
New,CleanUp,ReferenceOTU612304	1.47077e-06	9.49532e-05	2.22755e-06	1.47186e-05	0	0	0	0	0	0	0	0	0	0	Bacteria; Proteobacteria; Deltaproteobacteria; Myxococcales; uncultured
New,CleanUp,ReferenceOTU813704	5.58891e-05	0	5.4575e-05	2.45309e-06	0	0	0	0	0	0	0	0	0	0	Bacteria; Proteobacteria
GQ375270,1,1510	1.32369e-05	5.85545e-05	1.78204e-05	2.33044e-05	0	0	0	0	0	0	0	0	0	0	Bacteria; Deferribacteres; Deferribacteres; Deferribacterales; SAR406 clade(Marine group A); uncultured bacterium; uncultured bacterium
New,CleanUp,ReferenceOTU1084702	2.5003e-05	3.63987e-05	3.11857e-05	1.71717e-05	0	0	2.63985e-06	0	0	0	0	0	0	0	Bacteria; Chloroflexi; SAR202 clade; uncultured Chloroflexi bacterium; uncultured Chloroflexi bacterium; uncultured Chloroflexi bacterium; uncultured Chloroflexi bacterium
New,CleanUp,ReferenceOTU370485	2.20615e-05	4.43115e-05	3.11857e-05	1.47186e-05	0	0	0	0	0	0	0	0	0	0	Bacteria; Chloroflexi; SAR202 clade
New,CleanUp,ReferenceOTU56966	1.47077e-06	0	1.11378e-05	3.06637e-05	0	6.63083e-05	2.63985e-06	0	0	0	0	0	0	0	Bacteria; Proteobacteria; Gammaproteobacteria; Alteromonadales; Idiomarinaceae; Idiomarina
New,CleanUp,ReferenceOTU811075	3.82399e-05	2.21558e-05	2.0048e-05	3.06637e-05	0	1.02013e-06	0	0	0	0	0	0	0	0	Bacteria; Proteobacteria; Gammaproteobacteria; E01-9C-26 marine group
New,CleanUp,ReferenceOTU867683	2.64738e-05	6.48847e-05	3.34133e-06	1.71717e-05	0	0	0	0	0	0	0	0	0	0	Unassigned
New,CleanUp,ReferenceOTU88916	3.38276e-05	4.11464e-05	1.44791e-05	2.20778e-05	0	0	0	0	0	0	0	0	0	0	Bacteria; Proteobacteria; Deltaproteobacteria; Bdellovibrionales; Bacteriovoracaceae; uncultured
New,CleanUp,ReferenceOTU111076	4.85353e-05	1.58255e-05	3.22995e-05	1.47186e-05	0	0	0	0	0	0	0	0	0	0	Bacteria; Chloroflexi; SAR202 clade
New,ReferenceOTU1746	2.79445e-05	3.63987e-05	2.0048e-05	2.6984e-05	0	0	0	0	0	0	0	0	0	0	Unassigned
New,CleanUp,ReferenceOTU287076	3.52984e-05	4.74766e-05	1.0024e-05	1.83982e-05	0	0	0	0	0	0	0	0	0	0	Bacteria; Chloroflexi; SAR202 clade
New,ReferenceOTU2280	1.17661e-05	0	3.34133e-05	2.57575e-05	0	1.12214e-05	2.90384e-05	0	0	0	0	0	0	0	Bacteria; Proteobacteria; Gammaproteobacteria; Alteromonadales; Alteromonadaceae; Marinobacter; Marinobacter hydrocarbonoclasticus
New,CleanUp,ReferenceOTU966329	4.4123e-06	6.17196e-05	3.67546e-05	6.13273e-06	1.08473e-06	1.02013e-06	0	0	0	0	0	0	0	0	Bacteria; Planctomycetes; Planctomycetacia; Planctomycetales; Planctomycetaceae; Planctomyces; uncultured bacterium
New,CleanUp,ReferenceOTU432337	1.76492e-05	1.10779e-05	5.56888e-05	2.33044e-05	0	3.06038e-06	0	0	0	0	0	0	0	0	Bacteria; Chloroflexi; SAR202 clade
New,CleanUp,ReferenceOTU651612	0	0.000110779	0	0	0	0	0	0	0	0	0	0	0	0	Bacteria; Proteobacteria; Gammaproteobacteria; Vibrionales; Vibrionaceae; Photobacterium
EU869424,1,1425	3.67691e-05	1.10779e-05	5.79163e-05	4.90619e-06	0	0	0	0	0	0	0	0	0	0	Bacteria; Proteobacteria; Gammaproteobacteria; Oceanospirillales; Halomonadaceae; Halomonas
JN018859,1,1391	0	4.74766e-05	5.4575e-05	8.58583e-06	0	0	0	0	0	0	0	0	0	0	Bacteria; Bacteroidetes; Sphingobacteriia; Sphingobacteriales; Chitinophagaceae; uncultured; uncultured bacterium
New,CleanUp,ReferenceOTU7796	3.38276e-05	0	6.57128e-05	1.10389e-05	0	0	0	0	0	0	0	0	0	0	Bacteria; Proteobacteria; Gammaproteobacteria; Alteromonadales; Alteromonadaceae
New,CleanUp,ReferenceOTU747496	4.26522e-05	0	5.68026e-05	1.10389e-05	0	0	0	0	0	0	0	0	0	0	Bacteria; Proteobacteria; Gammaproteobacteria; Alteromonadales; Idiomarinaceae; Idiomarina
New,CleanUp,ReferenceOTU600656	2.94153e-05	0	7.01679e-05	6.13273e-06	0	2.04026e-06	2.63985e-06	0	0	0	0	0	0	0	Bacteria; Proteobacteria; Gammaproteobacteria; Oceanospirillales; Halomonadaceae; Halomonas
New,CleanUp,ReferenceOTU690711	2.5003e-05	3.16511e-06	7.35092e-05	8.58583e-06	0	0	0	0	0	0	0	0	0	0	Bacteria; Proteobacteria; Alphaproteobacteria; SAR11 clade; Surface 1; uncultured bacterium; uncultured bacterium
New,CleanUp,ReferenceOTU989247	2.05907e-05	3.32336e-05	4.90061e-05	7.35928e-06	0	0	0	0	0	0	0	0	0	0	Bacteria; Proteobacteria; Gammaproteobacteria; Oceanospirillales; Halomonadaceae; Halomonas
HM799100,1,1392	3.23568e-05	5.06417e-05	2.33893e-05	3.67964e-06	0	0	0	0	0	0	0	0	0	0	Bacteria; Bacteroidetes; Sphingobacteriia; Sphingobacteriales; WCHB1-69; uncultured bacterium; uncultured bacterium
New,CleanUp,ReferenceOTU368678	4.85353e-05	3.00685e-05	1.11378e-06	2.82106e-05	0	2.04026e-06	0	0	0	0	0	0	0	0	Unassigned
New,CleanUp,ReferenceOTU88292	3.97107e-05	3.32336e-05	3.4527e-05	2.45309e-06	0	0	0	0	0	0	0	0	0	0	Bacteria; Proteobacteria; Deltaproteobacteria; Desulfuromonadales; GR-WP33-58; uncultured bacterium; uncultured bacterium
New,CleanUp,ReferenceOTU316394	1.76492e-05	7.27975e-05	2.22755e-06	1.71717e-05	0	0	0	0	0	0	0	0	0	0	Bacteria; Acidobacteria; Acidobacteria; Subgroup 6; uncultured bacterium; uncultured bacterium; uncultured bacterium
New,CleanUp,ReferenceOTU75951	1.61784e-05	6.64673e-05	1.22515e-05	1.47186e-05	0	0	0	0	0	0	0	0	0	0	Bacteria; Acidobacteria; Acidobacteria; Subgroup 6; uncultured bacterium; uncultured bacterium; uncultured bacterium
GQ346795,1,1321	3.52984e-05	4.11464e-05	0	3.31168e-05	0	0	0	0	0	0	0	0	0	0	Bacteria; Proteobacteria; Alphaproteobacteria; Rhodobacterales; Rhodobacteraceae; uncultured; uncultured bacterium
JQ753218,1,1522	7.35383e-05	1.74081e-05	1.0024e-05	8.58583e-06	0	0	0	0	0	0	0	0	0	0	Bacteria; Planctomycetes; BD7-11; uncultured bacterium; uncultured bacterium; uncultured bacterium; uncultured bacterium
New,CleanUp,ReferenceOTU970292	0	5.22243e-05	3.34133e-06	5.39681e-05	0	0	0	0	0	0	0	0	0	0	Bacteria; Acidobacteria; Acidobacteria; Subgroup 6; uncultured bacterium; uncultured bacterium; uncultured bacterium
New,CleanUp,ReferenceOTU775391	4.70645e-05	3.79813e-05	1.11378e-05	1.22655e-05	0	1.02013e-06	0	0	0	0	0	0	0	0	Bacteria; Chloroflexi; SAR202 clade; uncultured bacterium; uncultured bacterium; uncultured bacterium; uncultured bacterium
New,CleanUp,ReferenceOTU838301	2.64738e-05	5.06417e-05	8.9102e-06	2.20778e-05	0	0	1.31993e-06	0	0	0	0	0	0	0	Bacteria; Chloroflexi; SAR202 clade
DQ009478,1,1823	7.35383e-06	6.64673e-05	0	3.55699e-05	0	0	0	0	0	0	0	0	0	0	Bacteria; Proteobacteria; Deltaproteobacteria; Desulfobacterales; Nitrospinaceae; Nitrospina; uncultured bacterium
New,CleanUp,ReferenceOTU534847	2.5003e-05	4.11464e-05	2.11617e-05	2.08513e-05	0	1.02013e-06	0	0	0	0	0	0	0	0	Bacteria; Chloroflexi; SAR202 clade; uncultured bacterium; uncultured bacterium; uncultured bacterium; uncultured bacterium
KC682757,1,1482	1.912e-05	5.06417e-05	2.33893e-05	1.59451e-05	0	0	0	0	0	0	0	0	0	0	Bacteria; Proteobacteria; Deltaproteobacteria; Bdellovibrionales; Bdellovibrionaceae; OM27 clade; uncultured bacterium
New,CleanUp,ReferenceOTU360482	1.61784e-05	1.58255e-06	8.57607e-05	2.45309e-06	0	3.06038e-06	0	0	0	0	0	0	0	0	Bacteria; Proteobacteria; Gammaproteobacteria; Alteromonadales; Idiomarinaceae; Idiomarina; uncultured Idiomarina sp,
New,CleanUp,ReferenceOTU27191	1.912e-05	3.00685e-05	4.00959e-05	1.96248e-05	0	0	0	0	0	0	0	0	0	0	Bacteria; Chloroflexi; SAR202 clade; uncultured bacterium; uncultured bacterium; uncultured bacterium; uncultured bacterium
New,CleanUp,ReferenceOTU121625	6.76552e-05	9.49532e-06	2.0048e-05	7.35928e-06	0	1.02013e-06	2.63985e-06	0	0	0	0	0	0	0	Unassigned
New,ReferenceOTU978	2.79445e-05	2.21558e-05	3.00719e-05	0	0	0	2.77185e-05	0	0	0	0	0	0	0	Bacteria; Proteobacteria; Gammaproteobacteria; Oceanospirillales; Alcanivoracaceae; Alcanivorax
DQ300557,1,1291	2.5003e-05	2.69034e-05	3.89821e-05	1.59451e-05	0	1.02013e-06	0	0	0	0	0	0	0	0	Archaea; Euryarchaeota; Thermoplasmata; Thermoplasmatales; Marine Group II
HQ673807,1,1517	1.02954e-05	2.8486e-05	3.34133e-05	3.55699e-05	0	0	0	0	0	0	0	0	0	0	Bacteria; Deferribacteres; Deferribacteres; Deferribacterales; SAR406 clade(Marine group A); uncultured bacterium; uncultured bacterium
New,CleanUp,ReferenceOTU596579	3.23568e-05	1.58255e-06	2.22755e-05	5.1515e-05	0	0	0	0	0	0	0	0	0	0	Bacteria; Cyanobacteria; ML635J-21; uncultured bacterium; uncultured bacterium; uncultured bacterium; uncultured bacterium
New,ReferenceOTU643	3.38276e-05	4.58941e-05	1.22515e-05	1.47186e-05	0	1.02013e-06	0	0	0	0	0	0	0	0	Bacteria; Proteobacteria; Deltaproteobacteria; Bdellovibrionales; Bdellovibrionaceae; OM27 clade; uncultured delta proteobacterium
New,CleanUp,ReferenceOTU337373	0	8.38754e-05	2.0048e-05	3.67964e-06	0	0	0	0	0	0	0	0	0	0	Bacteria; Chloroflexi; JG30-KF-CM66
New,CleanUp,ReferenceOTU6023	3.38276e-05	0	7.01679e-05	2.45309e-06	1.08473e-06	0	0	0	0	0	0	0	0	0	Bacteria; Proteobacteria; Gammaproteobacteria; Alteromonadales; Alteromonadaceae; Marinobacter; uncultured Marinobacter sp,
New,CleanUp,ReferenceOTU1107508	2.5003e-05	7.438e-05	4.4551e-06	2.45309e-06	0	1.02013e-06	0	0	0	0	0	0	0	0	Bacteria; Proteobacteria; Gammaproteobacteria; Oceanospirillales; Halomonadaceae; Halomonas; uncultured Halomonas sp,
New,CleanUp,ReferenceOTU407908	5.29476e-05	2.37383e-05	8.9102e-06	1.96248e-05	0	2.04026e-06	0	0	0	0	0	0	0	0	Bacteria; Chloroflexi; SAR202 clade; uncultured bacterium; uncultured bacterium; uncultured bacterium; uncultured bacterium
New,CleanUp,ReferenceOTU96772	5.44183e-05	2.69034e-05	2.45031e-05	1.22655e-06	0	0	0	0	0	0	0	0	0	0	Bacteria; Chloroflexi; SAR202 clade
New,CleanUp,ReferenceOTU882430	3.08861e-05	4.43115e-05	2.78444e-05	0	0	0	3.95978e-06	0	0	0	0	0	0	0	Bacteria; Proteobacteria; Deltaproteobacteria; Desulfobacterales; Nitrospinaceae; uncultured; uncultured bacterium
New,ReferenceOTU2354	3.23568e-05	9.49532e-06	4.56648e-05	1.10389e-05	0	3.06038e-06	5.27971e-06	0	0	0	0	0	0	0	Unassigned
U91587,1,1299	1.61784e-05	2.21558e-05	1.22515e-05	1.22655e-05	0	4.38655e-05	0	0	0	0	0	0	0	0	Bacteria; Proteobacteria; Gammaproteobacteria; Alteromonadales; Moritellaceae; Moritella
New,CleanUp,ReferenceOTU59037	4.70645e-05	3.32336e-05	1.78204e-05	8.58583e-06	0	0	0	0	0	0	0	0	0	0	Bacteria; Chloroflexi; SAR202 clade; uncultured Chloroflexi bacterium; uncultured Chloroflexi bacterium; uncultured Chloroflexi bacterium; uncultured Chloroflexi bacterium
New,CleanUp,ReferenceOTU44588	6.17722e-05	0	2.89582e-05	1.59451e-05	0	0	0	0	0	0	0	0	0	0	Bacteria; Proteobacteria; Gammaproteobacteria; Alteromonadales; Alteromonadaceae; Alteromonas
New,CleanUp,ReferenceOTU343960	2.20615e-05	6.80498e-05	6.68265e-06	9.81238e-06	0	0	0	0	0	0	0	0	0	0	Bacteria; Planctomycetes; Pla3 lineage; uncultured planctomycete; uncultured planctomycete; uncultured planctomycete; uncultured planctomycete
New,ReferenceOTU857	0	8.22928e-05	2.22755e-06	2.20778e-05	0	0	0	0	0	0	0	0	0	0	Bacteria; Proteobacteria; Deltaproteobacteria; Bdellovibrionales; Bdellovibrionaceae; OM27 clade; uncultured bacterium
New,CleanUp,ReferenceOTU1106847	0	5.38068e-05	0	5.27415e-05	0	0	0	0	0	0	0	0	0	0	Bacteria; Chloroflexi; SAR202 clade; uncultured marine microorganism; uncultured marine microorganism; uncultured marine microorganism; uncultured marine microorganism
New,CleanUp,ReferenceOTU169454	5.58891e-05	1.74081e-05	1.11378e-05	2.20778e-05	0	0	0	0	0	0	0	0	0	0	Bacteria; Deferribacteres; Deferribacteres; Deferribacterales; SAR406 clade(Marine group A); uncultured bacterium; uncultured bacterium
HQ673510,1,1457	2.64738e-05	1.58255e-05	4.67786e-05	1.71717e-05	0	0	0	0	0	0	0	0	0	0	Bacteria; Planctomycetes; Phycisphaerae; Phycisphaerales; Phycisphaeraceae; CL500-3; uncultured bacterium
DQ396219,1,1458	1.17661e-05	6.64673e-05	1.67066e-05	6.13273e-06	0	5.10064e-06	0	0	0	0	0	0	0	0	Bacteria; Planctomycetes; Planctomycetacia; Planctomycetales; Planctomycetaceae; Rhodopirellula
New,CleanUp,ReferenceOTU450277	2.94153e-06	0	0	0.00010303	0	0	0	0	0	0	0	0	0	0	Unassigned
EU491123,1,1521	5.88306e-06	6.80498e-05	0	3.18902e-05	0	0	0	0	0	0	0	0	0	0	Bacteria; NPL-UPA2; uncultured bacterium; uncultured bacterium; uncultured bacterium; uncultured bacterium; uncultured bacterium
New,CleanUp,ReferenceOTU316600	6.03014e-05	2.21558e-05	1.67066e-05	6.13273e-06	0	0	0	0	0	0	0	0	0	0	Bacteria; Verrucomicrobia; Arctic97B-4 marine group
New,ReferenceOTU239	6.76552e-05	1.74081e-05	2.0048e-05	0	0	0	0	0	0	0	0	0	0	0	Bacteria; Bacteroidetes; Flavobacteriia; Flavobacteriales; Flavobacteriaceae; Tenacibaculum; Tenacibaculum soleae
GQ337206,1,1468	1.76492e-05	4.74766e-05	2.0048e-05	1.96248e-05	0	0	0	0	0	0	0	0	0	0	Bacteria; Chloroflexi; SAR202 clade; uncultured Chloroflexi bacterium; uncultured Chloroflexi bacterium; uncultured Chloroflexi bacterium; uncultured Chloroflexi bacterium
New,CleanUp,ReferenceOTU1085662	4.26522e-05	3.00685e-05	1.0024e-05	2.08513e-05	1.08473e-06	0	0	0	0	0	0	0	0	0	Bacteria; Proteobacteria; Gammaproteobacteria; Xanthomonadales; uncultured; uncultured gamma proteobacterium; uncultured gamma proteobacterium
GQ348185,1,1340	3.23568e-05	4.58941e-05	8.9102e-06	1.3492e-05	0	0	3.95978e-06	0	0	0	0	0	0	0	Bacteria; Proteobacteria; Alphaproteobacteria; Rhodospirillales; Rhodospirillaceae; uncultured; uncultured alpha proteobacterium
FJ416101,1,1472	7.35383e-06	6.48847e-05	1.0024e-05	2.20778e-05	0	0	0	0	0	0	0	0	0	0	Bacteria; Planctomycetes; Phycisphaerae; Phycisphaerales; Phycisphaeraceae; Urania-1B-19 marine sediment group
New,CleanUp,ReferenceOTU484757	1.61784e-05	3.79813e-05	2.56168e-05	2.45309e-05	0	0	0	0	0	0	0	0	0	0	Bacteria; Acidobacteria; Acidobacteria; Subgroup 6
AM997306,1,1467	2.94153e-05	4.11464e-05	2.45031e-05	6.13273e-06	0	3.06038e-06	0	0	0	0	0	0	0	0	Bacteria; Chloroflexi; SAR202 clade
New,CleanUp,ReferenceOTU62677	2.35322e-05	4.43115e-05	1.55929e-05	1.96248e-05	0	1.02013e-06	0	0	0	0	0	0	0	0	Bacteria; Proteobacteria; Deltaproteobacteria; Sh765B-TzT-29; uncultured bacterium; uncultured bacterium; uncultured bacterium
AB193918,1,1524	1.02954e-05	4.74766e-05	4.4551e-06	4.17026e-05	0	0	0	0	0	0	0	0	0	0	Bacteria; Deferribacteres; Deferribacteres; Deferribacterales; SAR406 clade(Marine group A); uncultured bacterium; uncultured bacterium
New,CleanUp,ReferenceOTU160876	2.20615e-05	5.22243e-05	1.22515e-05	1.71717e-05	0	0	0	0	0	0	0	0	0	0	Bacteria; Chloroflexi; TK10
New,CleanUp,ReferenceOTU542615	3.38276e-05	3.63987e-05	2.22755e-05	1.10389e-05	0	0	0	0	0	0	0	0	0	0	Bacteria; Chloroflexi; SAR202 clade; uncultured deep-sea bacterium; uncultured deep-sea bacterium; uncultured deep-sea bacterium; uncultured deep-sea bacterium
New,CleanUp,ReferenceOTU128492	4.4123e-06	0	9.9126e-05	0	0	0	0	0	0	0	0	0	0	0	Bacteria; Proteobacteria; Gammaproteobacteria; Oceanospirillales; Halomonadaceae; Halomonas
New,CleanUp,ReferenceOTU63845	1.17661e-05	5.22243e-05	1.11378e-05	2.82106e-05	0	0	0	0	0	0	0	0	0	0	Bacteria; Chloroflexi; SAR202 clade; uncultured bacterium; uncultured bacterium; uncultured bacterium; uncultured bacterium
New,CleanUp,ReferenceOTU726415	2.35322e-05	3.95638e-05	7.79643e-06	2.82106e-05	0	0	3.95978e-06	0	0	0	0	0	0	0	Bacteria; Chloroflexi; SAR202 clade; uncultured bacterium; uncultured bacterium; uncultured bacterium; uncultured bacterium
New,ReferenceOTU2048	1.17661e-05	3.48162e-05	3.78684e-05	1.83982e-05	0	0	0	0	0	0	0	0	0	0	Bacteria; Chloroflexi; SAR202 clade
FN822112,1,1370	1.02954e-05	4.90592e-05	2.78444e-05	1.10389e-05	2.16947e-06	1.02013e-06	1.31993e-06	0	0	0	0	0	0	0	Bacteria; Planctomycetes; Planctomycetacia; Planctomycetales; Planctomycetaceae; Planctomyces; uncultured planctomycete
New,CleanUp,ReferenceOTU16490	2.94153e-06	7.27975e-05	0	2.6984e-05	0	0	0	0	0	0	0	0	0	0	Bacteria; Planctomycetes; Phycisphaerae; Phycisphaerales; Phycisphaeraceae; Phycisphaera; uncultured bacterium
New,CleanUp,ReferenceOTU939624	1.76492e-05	4.90592e-05	2.78444e-05	0	0	8.16103e-06	0	0	0	0	0	0	0	0	Bacteria; Proteobacteria; Gammaproteobacteria
New,CleanUp,ReferenceOTU346701	2.20615e-05	5.53894e-05	5.56888e-06	1.96248e-05	0	0	0	0	0	0	0	0	0	0	Bacteria; Acidobacteria; Acidobacteria; Subgroup 15
EU801268,1,1376	2.79445e-05	2.21558e-05	2.89582e-05	1.83982e-05	0	5.10064e-06	0	0	0	0	0	0	0	0	Bacteria; Proteobacteria; Alphaproteobacteria; SAR11 clade; Surface 1
New,ReferenceOTU295	1.47077e-05	5.22243e-05	1.22515e-05	2.33044e-05	0	0	0	0	0	0	0	0	0	0	Bacteria; Chloroflexi; SAR202 clade
HQ674220,1,1476	1.76492e-05	3.32336e-05	2.33893e-05	2.82106e-05	0	0	0	0	0	0	0	0	0	0	Bacteria; Proteobacteria; Deltaproteobacteria; SAR324 clade(Marine group B); uncultured bacterium; uncultured bacterium; uncultured bacterium
KC003343,1,1368	1.912e-05	4.2729e-05	1.44791e-05	2.08513e-05	0	0	5.27971e-06	0	0	0	0	0	0	0	Bacteria; Planctomycetes; Phycisphaerae; Phycisphaerales; Phycisphaeraceae; Urania-1B-19 marine sediment group
AB694302,1,1488	1.76492e-05	3.00685e-05	4.23235e-05	1.10389e-05	0	0	1.31993e-06	0	0	0	0	0	0	0	Bacteria; Chloroflexi; SAR202 clade; uncultured bacterium; uncultured bacterium; uncultured bacterium; uncultured bacterium
New,CleanUp,ReferenceOTU524934	1.61784e-05	1.89906e-05	2.78444e-05	3.92495e-05	0	0	0	0	0	0	0	0	0	0	Bacteria; Chloroflexi; SAR202 clade
JX226910,1,1487	1.912e-05	4.11464e-05	2.0048e-05	2.08513e-05	0	1.02013e-06	0	0	0	0	0	0	0	0	Bacteria; Actinobacteria; Thermoleophilia; Gaiellales; uncultured; uncultured bacterium; uncultured bacterium
AB694390,1,1367	2.20615e-05	5.38068e-05	1.67066e-05	8.58583e-06	0	1.02013e-06	0	0	0	0	0	0	0	0	Bacteria; Proteobacteria; Alphaproteobacteria; Rhodospirillales; Rhodospirillaceae; Defluviicoccus
New,ReferenceOTU943	4.4123e-06	7.27975e-05	0	2.33044e-05	0	0	1.31993e-06	0	0	0	0	0	0	0	Bacteria; Acidobacteria; Acidobacteria; Subgroup 6
New,CleanUp,ReferenceOTU978907	9.4129e-05	3.16511e-06	4.4551e-06	0	0	0	0	0	0	0	0	0	0	0	Bacteria; Bacteroidetes; Flavobacteriia; Flavobacteriales; Flavobacteriaceae; Zunongwangia
HQ672484,1,1502	0	5.85545e-05	7.79643e-06	3.43433e-05	0	1.02013e-06	0	0	0	0	0	0	0	0	Bacteria; Proteobacteria; AEGEAN-245; uncultured bacterium; uncultured bacterium; uncultured bacterium; uncultured bacterium
AB694284,1,1509	4.85353e-05	2.37383e-05	2.67306e-05	2.45309e-06	0	0	0	0	0	0	0	0	0	0	Bacteria; Proteobacteria; Deltaproteobacteria; GR-WP33-30; uncultured bacterium; uncultured bacterium; uncultured bacterium
New,CleanUp,ReferenceOTU437979	3.67691e-05	9.49532e-06	5.23474e-05	2.45309e-06	0	0	0	0	0	0	0	0	0	0	Bacteria; Chloroflexi; SAR202 clade; uncultured bacterium; uncultured bacterium; uncultured bacterium; uncultured bacterium
EF574837,1,1497	3.97107e-05	4.74766e-05	0	6.13273e-06	0	5.10064e-06	2.63985e-06	0	0	0	0	0	0	0	Bacteria; Bacteroidetes; Flavobacteriia; Flavobacteriales; NS7 marine group; uncultured bacterium; uncultured bacterium
New,CleanUp,ReferenceOTU185655	4.4123e-06	6.64673e-05	1.22515e-05	1.47186e-05	0	3.06038e-06	0	0	0	0	0	0	0	0	Bacteria; Chloroflexi; SAR202 clade
New,CleanUp,ReferenceOTU60499	1.912e-05	2.37383e-05	2.22755e-05	3.55699e-05	0	0	0	0	0	0	0	0	0	0	Bacteria; Chloroflexi; SAR202 clade
New,CleanUp,ReferenceOTU498351	1.47077e-05	2.53209e-05	4.34372e-05	1.71717e-05	0	0	0	0	0	0	0	0	0	0	Bacteria; Proteobacteria; Deltaproteobacteria; Bdellovibrionales; Bdellovibrionaceae; OM27 clade; uncultured bacterium
New,CleanUp,ReferenceOTU480472	2.05907e-05	5.69719e-05	3.34133e-06	1.96248e-05	0	0	0	0	0	0	0	0	0	0	Bacteria; Deferribacteres; Deferribacteres; Deferribacterales; SAR406 clade(Marine group A); uncultured bacterium; uncultured bacterium
New,CleanUp,ReferenceOTU220890	2.5003e-05	2.21558e-05	4.34372e-05	9.81238e-06	0	0	0	0	0	0	0	0	0	0	Unassigned
New,CleanUp,ReferenceOTU418865	0	7.12149e-05	8.9102e-06	1.71717e-05	0	0	2.63985e-06	0	0	0	0	0	0	0	Bacteria; Planctomycetes; Phycisphaerae; Phycisphaerales; Phycisphaeraceae; Phycisphaera
New,CleanUp,ReferenceOTU449564	1.17661e-05	4.43115e-05	1.55929e-05	2.82106e-05	0	0	0	0	0	0	0	0	0	0	Bacteria; Chloroflexi; SAR202 clade
New,CleanUp,ReferenceOTU705536	2.64738e-05	3.00685e-05	3.34133e-05	9.81238e-06	0	0	0	0	0	0	0	0	0	0	Bacteria; Chloroflexi; SAR202 clade; uncultured deep-sea bacterium; uncultured deep-sea bacterium; uncultured deep-sea bacterium; uncultured deep-sea bacterium
New,CleanUp,ReferenceOTU74884	8.08921e-05	1.58255e-06	0	1.71717e-05	0	0	0	0	0	0	0	0	0	0	Unassigned
New,CleanUp,ReferenceOTU1019143	2.05907e-05	3.32336e-05	3.34133e-05	1.22655e-05	0	0	0	0	0	0	0	0	0	0	Bacteria; Proteobacteria; Gammaproteobacteria; Oceanospirillales; Halomonadaceae; Halomonas
HM799079,1,1470	2.94153e-05	3.95638e-05	2.11617e-05	4.90619e-06	3.2542e-06	1.02013e-06	0	0	0	0	0	0	0	0	Bacteria; Proteobacteria; Deltaproteobacteria; Sh765B-TzT-29; uncultured delta proteobacterium; uncultured delta proteobacterium; uncultured delta proteobacterium
New,CleanUp,ReferenceOTU619641	3.97107e-05	0	5.34612e-05	6.13273e-06	0	0	0	0	0	0	0	0	0	0	Bacteria; Proteobacteria; Gammaproteobacteria; Alteromonadales; Idiomarinaceae; Idiomarina
New,CleanUp,ReferenceOTU897762	1.912e-05	5.06417e-05	1.11378e-06	2.57575e-05	0	0	2.63985e-06	0	0	0	0	0	0	0	Unassigned
New,CleanUp,ReferenceOTU48845	4.11814e-05	2.21558e-05	3.4527e-05	1.22655e-06	0	0	0	0	0	0	0	0	0	0	Unassigned
AJ810559,1,1432	1.47077e-06	0	2.22755e-06	0	0	8.16103e-06	8.71151e-05	0	0	0	0	0	0	0	Bacteria; Proteobacteria; Epsilonproteobacteria; Campylobacterales; Campylobacteraceae; Arcobacter; uncultured epsilon proteobacterium
New,CleanUp,ReferenceOTU567634	2.64738e-05	3.00685e-05	1.89342e-05	2.08513e-05	0	0	2.63985e-06	0	0	0	0	0	0	0	Bacteria; Chloroflexi; SAR202 clade
FQ032833,8508,10021	0	3.16511e-06	9.57847e-05	0	0	0	0	0	0	0	0	0	0	0	Bacteria; Bacteroidetes; Flavobacteriia; Flavobacteriales; Flavobacteriaceae; Leeuwenhoekiella
New,CleanUp,ReferenceOTU822189	5.88306e-06	4.43115e-05	1.55929e-05	3.31168e-05	0	0	0	0	0	0	0	0	0	0	Bacteria; Proteobacteria; Deltaproteobacteria; Bdellovibrionales; Bdellovibrionaceae; OM27 clade; uncultured delta proteobacterium
New,CleanUp,ReferenceOTU756632	1.912e-05	1.58255e-06	7.57367e-05	2.45309e-06	0	0	0	0	0	0	0	0	0	0	Bacteria; Proteobacteria; Gammaproteobacteria; Oceanospirillales; Alcanivoracaceae; Alcanivorax
New,CleanUp,ReferenceOTU1144363	8.82459e-06	3.63987e-05	2.89582e-05	2.45309e-05	0	0	0	0	0	0	0	0	0	0	Bacteria; Planctomycetes; Planctomycetacia; Planctomycetales; Planctomycetaceae; Bythopirellula; uncultured bacterium
New,CleanUp,ReferenceOTU191505	1.32369e-05	3.63987e-05	3.67546e-05	1.22655e-05	0	0	0	0	0	0	0	0	0	0	Bacteria; Chloroflexi; SAR202 clade
New,CleanUp,ReferenceOTU571844	2.35322e-05	2.8486e-05	4.4551e-05	0	0	2.04026e-06	0	0	0	0	0	0	0	0	Bacteria; Proteobacteria; Gammaproteobacteria; Oceanospirillales; Halomonadaceae; Halomonas; uncultured Halomonas sp,
New,CleanUp,ReferenceOTU508880	3.23568e-05	3.16511e-05	3.4527e-05	0	0	0	0	0	0	0	0	0	0	0	Bacteria; Planctomycetes; Planctomycetacia; Planctomycetales; Planctomycetaceae; Planctomyces
New,CleanUp,ReferenceOTU249279	4.55937e-05	1.58255e-06	5.01199e-05	1.22655e-06	0	0	0	0	0	0	0	0	0	0	Bacteria; Proteobacteria; Alphaproteobacteria; SAR11 clade; Surface 1; uncultured bacterium; uncultured bacterium
New,ReferenceOTU1826	1.61784e-05	3.00685e-05	3.34133e-05	1.71717e-05	0	0	1.31993e-06	0	0	0	0	0	0	0	Bacteria; Chloroflexi; SAR202 clade
New,CleanUp,ReferenceOTU706581	0	1.58255e-06	0	0	0	0	9.63546e-05	0	0	0	0	0	0	0	Unassigned
New,ReferenceOTU1697	1.47077e-05	3.16511e-06	1.55929e-05	2.57575e-05	0	3.06038e-06	3.5638e-05	0	0	0	0	0	0	0	Bacteria; Proteobacteria; Gammaproteobacteria; Alteromonadales; Alteromonadaceae; Marinobacter
New,CleanUp,ReferenceOTU430889	2.94153e-06	0	9.46709e-05	0	0	0	0	0	0	0	0	0	0	0	Bacteria; Proteobacteria; Deltaproteobacteria; Bdellovibrionales; Bdellovibrionaceae; OM27 clade; uncultured bacterium
New,CleanUp,ReferenceOTU998571	2.94153e-06	8.70405e-05	0	7.35928e-06	0	0	0	0	0	0	0	0	0	0	Bacteria; Chloroflexi; SAR202 clade; uncultured Chloroflexi bacterium; uncultured Chloroflexi bacterium; uncultured Chloroflexi bacterium; uncultured Chloroflexi bacterium
New,CleanUp,ReferenceOTU1054975	8.82459e-05	7.91277e-06	1.11378e-06	0	0	0	0	0	0	0	0	0	0	0	Bacteria; Bacteroidetes; Flavobacteriia; Flavobacteriales; Flavobacteriaceae
DQ396208,1,1454	1.76492e-05	2.69034e-05	3.11857e-05	1.3492e-05	0	4.08051e-06	3.95978e-06	0	0	0	0	0	0	0	Bacteria; Proteobacteria; Alphaproteobacteria; Sphingomonadales; Erythrobacteraceae; Altererythrobacter; uncultured organism
New,CleanUp,ReferenceOTU417642	2.05907e-05	3.32336e-05	2.78444e-05	1.3492e-05	0	2.04026e-06	0	0	0	0	0	0	0	0	Bacteria; Chloroflexi; SAR202 clade; uncultured bacterium; uncultured bacterium; uncultured bacterium; uncultured bacterium
New,CleanUp,ReferenceOTU565058	2.64738e-05	1.58255e-06	6.90541e-05	0	0	0	0	0	0	0	0	0	0	0	Bacteria; Proteobacteria; Gammaproteobacteria; E01-9C-26 marine group; uncultured bacterium; uncultured bacterium; uncultured bacterium
New,CleanUp,ReferenceOTU840516	8.82459e-06	5.22243e-05	1.55929e-05	1.83982e-05	0	2.04026e-06	0	0	0	0	0	0	0	0	Bacteria; Proteobacteria; Gammaproteobacteria
New,CleanUp,ReferenceOTU220626	3.38276e-05	3.16511e-06	5.12337e-05	8.58583e-06	0	0	0	0	0	0	0	0	0	0	Bacteria; Proteobacteria; Gammaproteobacteria; Alteromonadales; Idiomarinaceae; Idiomarina
KC294645,1,1411	0	1.58255e-06	1.33653e-05	0	0	6.73285e-05	1.45192e-05	0	0	0	0	0	0	0	Bacteria; Proteobacteria; Alphaproteobacteria; Rhodobacterales; Rhodobacteraceae
New,ReferenceOTU2217	3.08861e-05	3.16511e-06	5.90301e-05	3.67964e-06	0	0	0	0	0	0	0	0	0	0	Bacteria; Proteobacteria; Gammaproteobacteria; Salinisphaerales; Salinisphaeraceae; ZD0417 marine group; uncultured bacterium
New,CleanUp,ReferenceOTU1060439	0	8.07103e-05	0	1.59451e-05	0	0	0	0	0	0	0	0	0	0	Bacteria; Acidobacteria; Acidobacteria; Subgroup 6; uncultured bacterium; uncultured bacterium; uncultured bacterium
EU308446,1,1531	4.4123e-06	0	2.22755e-05	4.0476e-05	0	2.14227e-05	7.91956e-06	0	0	0	0	0	0	0	Bacteria; Proteobacteria; Gammaproteobacteria; Alteromonadales; Idiomarinaceae; Idiomarina
JQ678402,1,1507	4.55937e-05	9.49532e-06	2.78444e-05	1.3492e-05	0	0	0	0	0	0	0	0	0	0	Bacteria; Planctomycetes; OM190; uncultured bacterium; uncultured bacterium; uncultured bacterium; uncultured bacterium
KF271146,1,1435	1.47077e-05	3.16511e-05	3.89821e-05	1.10389e-05	0	0	0	0	0	0	0	0	0	0	Bacteria; Proteobacteria; Deltaproteobacteria; Bdellovibrionales; Bdellovibrionaceae; OM27 clade; uncultured bacterium
New,CleanUp,ReferenceOTU688405	1.02954e-05	4.58941e-05	1.67066e-05	2.33044e-05	0	0	0	0	0	0	0	0	0	0	Bacteria; Chloroflexi; SAR202 clade; uncultured Chloroflexi bacterium; uncultured Chloroflexi bacterium; uncultured Chloroflexi bacterium; uncultured Chloroflexi bacterium
New,CleanUp,ReferenceOTU541146	2.5003e-05	1.26604e-05	3.89821e-05	1.3492e-05	0	3.06038e-06	2.63985e-06	0	0	0	0	0	0	0	Unassigned
KC331302,1,1518	0	6.64673e-05	1.11378e-06	2.82106e-05	0	0	0	0	0	0	0	0	0	0	Bacteria; Acidobacteria; Acidobacteria; Subgroup 6; uncultured bacterium; uncultured bacterium; uncultured bacterium
FJ002861,1,1273	2.79445e-05	6.33022e-06	6.01439e-05	1.22655e-06	0	0	0	0	0	0	0	0	0	0	Archaea; Euryarchaeota; Halobacteria; Halobacteriales; Marine Hydrothermal Vent Group(MHVG)
New,CleanUp,ReferenceOTU830690	8.82459e-06	5.38068e-05	1.22515e-05	1.96248e-05	0	1.02013e-06	0	0	0	0	0	0	0	0	Bacteria; Acidobacteria; Acidobacteria; Subgroup 21; uncultured bacterium; uncultured bacterium; uncultured bacterium
New,CleanUp,ReferenceOTU139999	8.23629e-05	1.58255e-06	8.9102e-06	0	0	0	2.63985e-06	0	0	0	0	0	0	0	Bacteria; Proteobacteria; Gammaproteobacteria; Oceanospirillales; SUP05 cluster; uncultured gamma proteobacterium; uncultured gamma proteobacterium
KF758681,1,1515	8.82459e-06	0	2.22755e-05	1.83982e-05	0	3.67246e-05	9.23948e-06	0	0	0	0	0	0	0	Bacteria; Proteobacteria; Gammaproteobacteria; Alteromonadales; Alteromonadaceae
GQ391947,1,1394	1.76492e-05	0	5.68026e-05	2.08513e-05	0	0	0	0	0	0	0	0	0	0	Bacteria; Bacteroidetes; Flavobacteriia; Flavobacteriales; Flavobacteriaceae; Mesonia
New,CleanUp,ReferenceOTU169808	0	7.91277e-05	0	1.59451e-05	0	0	0	0	0	0	0	0	0	0	Bacteria; Spirochaetae; Spirochaetes; Spirochaetales; Spirochaetaceae; Spirochaeta; uncultured Spirochaetes bacterium
New,CleanUp,ReferenceOTU680865	3.82399e-05	9.49532e-06	3.67546e-05	6.13273e-06	1.08473e-06	3.06038e-06	0	0	0	0	0	0	0	0	Bacteria; Bacteroidetes; Flavobacteriia; Flavobacteriales; Cryomorphaceae; Crocinitomix; uncultured bacterium
New,ReferenceOTU2428	7.35383e-06	6.33022e-05	4.4551e-06	1.96248e-05	0	0	0	0	0	0	0	0	0	0	Bacteria; Proteobacteria; Deltaproteobacteria; Bdellovibrionales; Bdellovibrionaceae; OM27 clade; uncultured delta proteobacterium
New,CleanUp,ReferenceOTU15582	2.20615e-05	0	5.56888e-05	1.59451e-05	0	1.02013e-06	0	0	0	0	0	0	0	0	Bacteria; Candidate division OD1; uncultured bacterium; uncultured bacterium; uncultured bacterium; uncultured bacterium; uncultured bacterium
New,CleanUp,ReferenceOTU254203	2.20615e-05	3.79813e-05	1.0024e-05	2.45309e-05	0	0	0	0	0	0	0	0	0	0	Bacteria; Proteobacteria; Alphaproteobacteria; Rhodospirillales; Rhodospirillaceae; AEGEAN-169 marine group; uncultured bacterium
New,CleanUp,ReferenceOTU15002	2.35322e-05	4.11464e-05	2.78444e-05	0	0	2.04026e-06	0	0	0	0	0	0	0	0	Unassigned
New,CleanUp,ReferenceOTU635449	1.32369e-05	5.22243e-05	2.22755e-06	2.57575e-05	0	1.02013e-06	0	0	0	0	0	0	0	0	Bacteria; Deferribacteres; Deferribacteres; Deferribacterales; SAR406 clade(Marine group A); uncultured bacterium; uncultured bacterium
New,CleanUp,ReferenceOTU886263	3.67691e-05	6.33022e-06	3.89821e-05	1.22655e-05	0	0	0	0	0	0	0	0	0	0	Bacteria; Proteobacteria; Gammaproteobacteria; Alteromonadales; Idiomarinaceae; Idiomarina
New,CleanUp,ReferenceOTU1131169	5.0006e-05	0	3.67546e-05	7.35928e-06	0	0	0	0	0	0	0	0	0	0	Bacteria; Proteobacteria; Gammaproteobacteria; Oceanospirillales
New,CleanUp,ReferenceOTU800132	0	6.96324e-05	3.34133e-06	1.71717e-05	0	0	3.95978e-06	0	0	0	0	0	0	0	Bacteria; Planctomycetes; Phycisphaerae; Phycisphaerales; Phycisphaeraceae; Phycisphaera
New,CleanUp,ReferenceOTU595104	2.5003e-05	2.37383e-05	3.67546e-05	8.58583e-06	0	0	0	0	0	0	0	0	0	0	Bacteria; Deferribacteres; Deferribacteres; Deferribacterales; SAR406 clade(Marine group A); uncultured bacterium; uncultured bacterium
New,ReferenceOTU2134	1.47077e-06	8.22928e-05	0	7.35928e-06	0	0	2.63985e-06	0	0	0	0	0	0	0	Bacteria; Acidobacteria; Acidobacteria; Subgroup 6; uncultured bacterium; uncultured bacterium; uncultured bacterium
HQ672761,1,1499	3.52984e-05	2.8486e-05	3.34133e-06	2.33044e-05	3.2542e-06	0	0	0	0	0	0	0	0	0	Bacteria; Proteobacteria; SPOTSOCT00m83; uncultured bacterium; uncultured bacterium; uncultured bacterium; uncultured bacterium
New,CleanUp,ReferenceOTU145523	2.79445e-05	3.48162e-05	1.0024e-05	2.08513e-05	0	0	0	0	0	0	0	0	0	0	Bacteria; Proteobacteria; Alphaproteobacteria; Rhodospirillales; Rhodospirillaceae; uncultured
HQ673582,1,1452	2.5003e-05	3.48162e-05	2.11617e-05	7.35928e-06	0	0	5.27971e-06	0	0	0	0	0	0	0	Bacteria; Proteobacteria; Alphaproteobacteria; SAR11 clade; Deep 1
FR686241,1,1444	5.0006e-05	2.21558e-05	7.79643e-06	1.3492e-05	0	0	0	0	0	0	0	0	0	0	Bacteria; Proteobacteria; Alphaproteobacteria; SAR11 clade; Surface 1; uncultured marine bacterium; uncultured marine bacterium
New,CleanUp,ReferenceOTU922349	7.35383e-06	5.06417e-05	2.56168e-05	9.81238e-06	0	0	0	0	0	0	0	0	0	0	Bacteria; BD1-5; uncultured bacterium; uncultured bacterium; uncultured bacterium; uncultured bacterium; uncultured bacterium
New,CleanUp,ReferenceOTU663118	1.32369e-05	5.22243e-05	1.55929e-05	1.22655e-05	0	0	0	0	0	0	0	0	0	0	Bacteria; Proteobacteria; Deltaproteobacteria; Desulfuromonadales; GR-WP33-58; uncultured bacterium; uncultured bacterium
New,CleanUp,ReferenceOTU3193	1.76492e-05	3.00685e-05	3.4527e-05	1.10389e-05	0	0	0	0	0	0	0	0	0	0	Bacteria; Chloroflexi; SAR202 clade; uncultured bacterium; uncultured bacterium; uncultured bacterium; uncultured bacterium
New,CleanUp,ReferenceOTU39088	3.67691e-05	0	4.78923e-05	8.58583e-06	0	0	0	0	0	0	0	0	0	0	Bacteria; Proteobacteria; Gammaproteobacteria; Alteromonadales; Idiomarinaceae; Idiomarina
New,CleanUp,ReferenceOTU1052404	7.35383e-06	2.8486e-05	3.34133e-06	5.39681e-05	0	0	0	0	0	0	0	0	0	0	Bacteria; Proteobacteria; Deltaproteobacteria; Myxococcales; 0319-6G20
New,CleanUp,ReferenceOTU1054072	1.76492e-05	3.48162e-05	2.33893e-05	1.71717e-05	0	0	0	0	0	0	0	0	0	0	Bacteria; Proteobacteria; Gammaproteobacteria; KI89A clade; uncultured soil bacterium; uncultured soil bacterium; uncultured soil bacterium
New,CleanUp,ReferenceOTU948029	3.38276e-05	2.21558e-05	2.0048e-05	1.59451e-05	0	1.02013e-06	0	0	0	0	0	0	0	0	Bacteria; Proteobacteria; Gammaproteobacteria; E01-9C-26 marine group; uncultured bacterium; uncultured bacterium; uncultured bacterium
New,CleanUp,ReferenceOTU1142735	2.05907e-05	2.8486e-05	2.89582e-05	9.81238e-06	0	5.10064e-06	0	0	0	0	0	0	0	0	Bacteria; Actinobacteria; Acidimicrobiia; Acidimicrobiales; OM1 clade; uncultured bacterium; uncultured bacterium
New,CleanUp,ReferenceOTU301076	4.4123e-05	6.33022e-06	1.67066e-05	2.57575e-05	0	0	0	0	0	0	0	0	0	0	Bacteria; Lentisphaerae; Lentisphaeria; Lentisphaerales; Lentisphaeraceae; Lentisphaera; uncultured bacterium
New,ReferenceOTU2004	6.61845e-05	3.16511e-06	2.11617e-05	0	0	2.04026e-06	0	0	0	0	0	0	0	0	Unassigned
FJ826237,1,1481	4.11814e-05	9.49532e-06	2.45031e-05	1.71717e-05	0	0	0	0	0	0	0	0	0	0	Bacteria; Bacteroidetes; Cytophagia; Order II; Rhodothermaceae; uncultured
New,CleanUp,ReferenceOTU392558	3.52984e-05	4.74766e-06	5.01199e-05	0	0	2.04026e-06	0	0	0	0	0	0	0	0	Bacteria; Chloroflexi; SAR202 clade; uncultured Chloroflexi bacterium; uncultured Chloroflexi bacterium; uncultured Chloroflexi bacterium; uncultured Chloroflexi bacterium
New,CleanUp,ReferenceOTU123545	4.11814e-05	1.4243e-05	2.45031e-05	1.22655e-05	0	0	0	0	0	0	0	0	0	0	Bacteria; Proteobacteria; Gammaproteobacteria; Alteromonadales; Alteromonadaceae; Alteromonas
HQ163744,1,1387	4.26522e-05	9.49532e-06	6.68265e-06	1.83982e-05	0	3.06038e-06	1.18793e-05	0	0	0	0	0	0	0	Bacteria; Proteobacteria; Gammaproteobacteria; Oceanospirillales; SUP05 cluster; uncultured gamma proteobacterium; uncultured gamma proteobacterium
EF573762,1,1520	3.67691e-05	3.32336e-05	3.34133e-06	1.83982e-05	0	0	0	0	0	0	0	0	0	0	Bacteria; Verrucomicrobia; Opitutae; Puniceicoccales; Puniceicoccaceae; marine group; uncultured bacterium
New,CleanUp,ReferenceOTU450170	1.02954e-05	1.58255e-05	5.4575e-05	1.10389e-05	0	0	0	0	0	0	0	0	0	0	Bacteria; Proteobacteria; Deltaproteobacteria; Bdellovibrionales; Bdellovibrionaceae; OM27 clade; uncultured delta proteobacterium
New,CleanUp,ReferenceOTU385910	3.38276e-05	2.69034e-05	2.11617e-05	9.81238e-06	0	0	0	0	0	0	0	0	0	0	Unassigned
New,CleanUp,ReferenceOTU144289	0	6.0137e-05	4.4551e-06	2.6984e-05	0	0	0	0	0	0	0	0	0	0	Unassigned
HQ672580,1,1485	5.88306e-06	5.06417e-05	5.56888e-06	2.94371e-05	0	0	0	0	0	0	0	0	0	0	Bacteria; Proteobacteria; Deltaproteobacteria; Desulfobacterales; Nitrospinaceae; Nitrospina; uncultured bacterium
New,CleanUp,ReferenceOTU145830	0	1.58255e-06	0	0	0	4.08051e-06	8.57952e-05	0	0	0	0	0	0	0	Bacteria; Bacteroidetes; Sphingobacteriia; Sphingobacteriales; Saprospiraceae; uncultured; uncultured bacterium
HQ673912,1,1486	4.4123e-06	7.12149e-05	2.22755e-06	1.3492e-05	0	0	0	0	0	0	0	0	0	0	Bacteria; Proteobacteria; Deltaproteobacteria; Desulfobacterales; Nitrospinaceae; Nitrospina; uncultured bacterium
New,CleanUp,ReferenceOTU212693	0	1.58255e-06	0	0	0	0	8.9755e-05	0	0	0	0	0	0	0	Unassigned
New,CleanUp,ReferenceOTU450229	5.0006e-05	1.74081e-05	1.0024e-05	9.81238e-06	0	4.08051e-06	0	0	0	0	0	0	0	0	Bacteria; Chloroflexi; SAR202 clade
New,CleanUp,ReferenceOTU1082705	1.17661e-05	3.79813e-05	3.56408e-05	4.90619e-06	0	1.02013e-06	0	0	0	0	0	0	0	0	Bacteria; Candidate division BRC1; uncultured bacterium; uncultured bacterium; uncultured bacterium; uncultured bacterium; uncultured bacterium
New,CleanUp,ReferenceOTU88165	2.35322e-05	2.69034e-05	2.22755e-05	1.59451e-05	0	0	2.63985e-06	0	0	0	0	0	0	0	Bacteria; Chloroflexi; SAR202 clade; uncultured bacterium; uncultured bacterium; uncultured bacterium; uncultured bacterium
New,CleanUp,ReferenceOTU460497	2.5003e-05	3.00685e-05	3.11857e-05	4.90619e-06	0	0	0	0	0	0	0	0	0	0	Unassigned
New,CleanUp,ReferenceOTU1135396	4.4123e-06	7.438e-05	0	1.22655e-05	0	0	0	0	0	0	0	0	0	0	Bacteria; Acidobacteria; Subgroup 26; uncultured Acidobacteria bacterium; uncultured Acidobacteria bacterium; uncultured Acidobacteria bacterium; uncultured Acidobacteria bacterium
EF573081,1,1493	6.9126e-05	4.74766e-06	0	1.71717e-05	0	0	0	0	0	0	0	0	0	0	Bacteria; Bacteroidetes; Cytophagia; Cytophagales; Flammeovirgaceae; Marinoscillum; uncultured bacterium
New,CleanUp,ReferenceOTU23534	2.79445e-05	4.74766e-06	5.4575e-05	3.67964e-06	0	0	0	0	0	0	0	0	0	0	Bacteria; Proteobacteria; Gammaproteobacteria; E01-9C-26 marine group
New,CleanUp,ReferenceOTU165106	1.47077e-06	4.2729e-05	0	4.66088e-05	0	0	0	0	0	0	0	0	0	0	Bacteria; Proteobacteria; TA18; uncultured delta proteobacterium; uncultured delta proteobacterium; uncultured delta proteobacterium; uncultured delta proteobacterium
New,CleanUp,ReferenceOTU904240	3.08861e-05	1.10779e-05	2.89582e-05	1.96248e-05	0	0	0	0	0	0	0	0	0	0	Bacteria; Chloroflexi; SAR202 clade
HQ674104,1,1522	8.82459e-06	4.43115e-05	6.68265e-06	3.06637e-05	0	0	0	0	0	0	0	0	0	0	Bacteria; Deferribacteres; Deferribacteres; Deferribacterales; SAR406 clade(Marine group A); uncultured bacterium; uncultured bacterium
GU108548,1,1407	1.32369e-05	3.79813e-05	2.11617e-05	1.59451e-05	0	2.04026e-06	0	0	0	0	0	0	0	0	Bacteria; Proteobacteria; Gammaproteobacteria; Oceanospirillales; Halomonadaceae; Halomonas; uncultured bacterium
EU650243,1,1404	7.35383e-06	3.79813e-05	6.68265e-06	3.31168e-05	0	5.10064e-06	0	0	0	0	0	0	0	0	Archaea; Thaumarchaeota; Marine Benthic Group A; uncultured archaeon; uncultured archaeon; uncultured archaeon; uncultured archaeon
New,CleanUp,ReferenceOTU306915	2.94153e-06	6.0137e-05	0	2.57575e-05	0	0	1.31993e-06	0	0	0	0	0	0	0	Bacteria; Planctomycetes; Phycisphaerae; Phycisphaerales; Phycisphaeraceae; Phycisphaera; uncultured bacterium
HQ673872,1,1478	1.61784e-05	3.32336e-05	1.11378e-05	2.94371e-05	0	0	0	0	0	0	0	0	0	0	Bacteria; Proteobacteria; Deltaproteobacteria; Desulfobacterales; Nitrospinaceae; Nitrospina
HQ674387,1,1522	2.05907e-05	2.37383e-05	2.33893e-05	2.20778e-05	0	0	0	0	0	0	0	0	0	0	Bacteria; Proteobacteria; Deltaproteobacteria; Desulfuromonadales; GR-WP33-58; uncultured bacterium; uncultured bacterium
New,CleanUp,ReferenceOTU872060	2.64738e-05	3.16511e-06	4.23235e-05	1.47186e-05	0	3.06038e-06	0	0	0	0	0	0	0	0	Bacteria; Proteobacteria; Gammaproteobacteria; Oceanospirillales; Halomonadaceae; Halomonas
New,CleanUp,ReferenceOTU956591	5.88306e-06	6.17196e-05	0	2.20778e-05	0	0	0	0	0	0	0	0	0	0	Bacteria; Chloroflexi; SAR202 clade; uncultured bacterium; uncultured bacterium; uncultured bacterium; uncultured bacterium
New,CleanUp,ReferenceOTU160445	2.35322e-05	3.32336e-05	0	3.18902e-05	0	1.02013e-06	0	0	0	0	0	0	0	0	Bacteria; Acidobacteria; Acidobacteria; Subgroup 6
New,CleanUp,ReferenceOTU726197	1.61784e-05	6.33022e-06	6.34852e-05	3.67964e-06	0	0	0	0	0	0	0	0	0	0	Bacteria; Proteobacteria; Gammaproteobacteria; Alteromonadales; Idiomarinaceae; Idiomarina
New,CleanUp,ReferenceOTU131149	1.61784e-05	3.95638e-05	5.56888e-06	2.82106e-05	0	0	0	0	0	0	0	0	0	0	Bacteria; Chloroflexi; SAR202 clade; uncultured deep-sea bacterium; uncultured deep-sea bacterium; uncultured deep-sea bacterium; uncultured deep-sea bacterium
AY664138,1,1204	3.67691e-05	3.00685e-05	0	1.3492e-05	0	9.18115e-06	0	0	0	0	0	0	0	0	Bacteria; Cyanobacteria; Chloroplast; uncultured bacterium; uncultured bacterium; uncultured bacterium; uncultured bacterium
HQ673902,1,1520	1.17661e-05	2.37383e-05	1.44791e-05	3.92495e-05	0	0	0	0	0	0	0	0	0	0	Bacteria; Deferribacteres; Deferribacteres; Deferribacterales; SAR406 clade(Marine group A); uncultured bacterium; uncultured bacterium
New,CleanUp,ReferenceOTU987232	3.08861e-05	4.2729e-05	4.4551e-06	1.10389e-05	0	0	0	0	0	0	0	0	0	0	Bacteria; Proteobacteria; Deltaproteobacteria; Myxococcales; 0319-6G20
New,CleanUp,ReferenceOTU871262	2.05907e-05	4.2729e-05	1.0024e-05	1.47186e-05	0	1.02013e-06	0	0	0	0	0	0	0	0	Bacteria; Chloroflexi; TK10; uncultured bacterium; uncultured bacterium; uncultured bacterium; uncultured bacterium
HQ673788,1,1405	2.05907e-05	1.89906e-05	3.00719e-05	1.71717e-05	0	2.04026e-06	0	0	0	0	0	0	0	0	Bacteria; Proteobacteria; Alphaproteobacteria; SAR11 clade; Surface 1; uncultured bacterium; uncultured bacterium
New,CleanUp,ReferenceOTU913422	0	5.53894e-05	1.89342e-05	9.81238e-06	0	3.06038e-06	1.31993e-06	0	0	0	0	0	0	0	Bacteria; Chloroflexi; JG30-KF-CM66
AB220090,1,1368	7.5009e-05	6.33022e-06	0	0	0	7.1409e-06	0	0	0	0	0	0	0	0	Bacteria; Proteobacteria; Alphaproteobacteria; Rhizobiales; Methylobacteriaceae; Methylobacterium; uncultured bacterium
FJ487453,1,1433	3.67691e-05	7.91277e-06	2.78444e-05	1.59451e-05	0	0	0	0	0	0	0	0	0	0	Archaea; Thaumarchaeota; Marine Benthic Group A; uncultured crenarchaeote; uncultured crenarchaeote; uncultured crenarchaeote; uncultured crenarchaeote
JQ978591,1,1479	2.20615e-05	3.00685e-05	1.78204e-05	1.83982e-05	0	0	0	0	0	0	0	0	0	0	Bacteria; Chloroflexi; SAR202 clade; uncultured bacterium; uncultured bacterium; uncultured bacterium; uncultured bacterium
New,CleanUp,ReferenceOTU992643	1.47077e-05	3.63987e-05	2.33893e-05	1.3492e-05	0	0	0	0	0	0	0	0	0	0	Bacteria; Proteobacteria; Betaproteobacteria; Nitrosomonadales; Nitrosomonadaceae; uncultured; uncultured bacterium
New,CleanUp,ReferenceOTU402059	5.73599e-05	0	2.0048e-05	1.22655e-06	0	9.18115e-06	0	0	0	0	0	0	0	0	Bacteria; Proteobacteria; Gammaproteobacteria; Alteromonadales; Alteromonadaceae; Salinimonas
New,CleanUp,ReferenceOTU30349	1.47077e-06	3.32336e-05	2.22755e-05	3.06637e-05	0	0	0	0	0	0	0	0	0	0	Bacteria; Proteobacteria; Gammaproteobacteria; E01-9C-26 marine group; uncultured bacterium; uncultured bacterium; uncultured bacterium
EU478623,1,2372	0	7.12149e-05	0	1.22655e-05	0	0	3.95978e-06	0	0	0	0	0	0	0	Bacteria; Planctomycetes; OM190
New,ReferenceOTU135	2.79445e-05	2.21558e-05	3.11857e-05	6.13273e-06	0	0	0	0	0	0	0	0	0	0	Unassigned
EU802876,1,1440	2.35322e-05	3.16511e-05	8.9102e-06	2.33044e-05	0	0	0	0	0	0	0	0	0	0	Bacteria; Proteobacteria; Alphaproteobacteria; SAR11 clade; Surface 1
New,CleanUp,ReferenceOTU933107	4.11814e-05	1.74081e-05	2.0048e-05	7.35928e-06	0	0	1.31993e-06	0	0	0	0	0	0	0	Bacteria; Planctomycetes; Planctomycetacia; Planctomycetales; Planctomycetaceae; uncultured
New,CleanUp,ReferenceOTU282925	1.76492e-05	3.16511e-05	2.45031e-05	1.3492e-05	0	0	0	0	0	0	0	0	0	0	Bacteria; Planctomycetes; Phycisphaerae; Pla1 lineage; uncultured organism; uncultured organism; uncultured organism
New,CleanUp,ReferenceOTU701736	2.20615e-05	3.48162e-05	2.78444e-05	2.45309e-06	0	0	0	0	0	0	0	0	0	0	Unassigned
New,CleanUp,ReferenceOTU598023	0	4.2729e-05	1.0024e-05	3.43433e-05	0	0	0	0	0	0	0	0	0	0	Bacteria; Planctomycetes; Planctomycetacia; Planctomycetales; Planctomycetaceae; Planctomyces; uncultured bacterium
GU145499,1,1519	8.82459e-06	5.38068e-05	1.33653e-05	1.10389e-05	0	0	0	0	0	0	0	0	0	0	Bacteria; Planctomycetes; Pla3 lineage; uncultured planctomycete; uncultured planctomycete; uncultured planctomycete; uncultured planctomycete
New,CleanUp,ReferenceOTU984562	7.35383e-06	4.74766e-05	2.11617e-05	1.10389e-05	0	0	0	0	0	0	0	0	0	0	Bacteria; Proteobacteria; Deltaproteobacteria; Sh765B-TzT-29; uncultured bacterium; uncultured bacterium; uncultured bacterium
New,CleanUp,ReferenceOTU493107	3.08861e-05	2.69034e-05	2.67306e-05	2.45309e-06	0	0	0	0	0	0	0	0	0	0	Bacteria; Chloroflexi; SAR202 clade; uncultured bacterium; uncultured bacterium; uncultured bacterium; uncultured bacterium
New,CleanUp,ReferenceOTU1028559	1.17661e-05	2.05732e-05	1.22515e-05	4.17026e-05	0	0	0	0	0	0	0	0	0	0	Unassigned
DQ396172,1,1515	2.5003e-05	2.8486e-05	1.55929e-05	1.71717e-05	0	0	0	0	0	0	0	0	0	0	Bacteria; Proteobacteria; Deltaproteobacteria; SAR324 clade(Marine group B)
New,CleanUp,ReferenceOTU994777	2.20615e-05	2.8486e-05	2.33893e-05	1.22655e-05	0	0	0	0	0	0	0	0	0	0	Bacteria; Deferribacteres; Deferribacteres; Deferribacterales; SAR406 clade(Marine group A); uncultured bacterium; uncultured bacterium
EU802905,1,1437	3.08861e-05	3.95638e-05	2.22755e-06	1.3492e-05	0	0	0	0	0	0	0	0	0	0	Bacteria; Cyanobacteria; Cyanobacteria; SubsectionI; FamilyI; Prochlorococcus; uncultured bacterium
New,CleanUp,ReferenceOTU409235	7.35383e-06	0	0	7.8499e-05	0	0	0	0	0	0	0	0	0	0	Bacteria; Proteobacteria; Gammaproteobacteria; Alteromonadales; Alteromonadaceae; Salinimonas
New,CleanUp,ReferenceOTU46957	1.47077e-05	4.11464e-05	6.68265e-06	2.33044e-05	0	0	0	0	0	0	0	0	0	0	Bacteria; Deferribacteres; Deferribacteres; Deferribacterales; SAR406 clade(Marine group A); uncultured bacterium; uncultured bacterium
New,CleanUp,ReferenceOTU479396	1.17661e-05	4.90592e-05	7.79643e-06	1.71717e-05	0	0	0	0	0	0	0	0	0	0	Bacteria; Verrucomicrobia; Opitutae; MB11C04 marine group; uncultured bacterium; uncultured bacterium; uncultured bacterium
HQ673081,1,1519	3.23568e-05	2.05732e-05	1.67066e-05	1.59451e-05	0	0	0	0	0	0	0	0	0	0	Bacteria; Deferribacteres; Deferribacteres; Deferribacterales; SAR406 clade(Marine group A); uncultured bacterium; uncultured bacterium
New,CleanUp,ReferenceOTU361679	3.67691e-05	3.00685e-05	8.9102e-06	9.81238e-06	0	0	0	0	0	0	0	0	0	0	Bacteria; Chloroflexi; SAR202 clade; uncultured Chloroflexi bacterium; uncultured Chloroflexi bacterium; uncultured Chloroflexi bacterium; uncultured Chloroflexi bacterium
New,CleanUp,ReferenceOTU531818	8.82459e-06	3.48162e-05	2.22755e-05	1.96248e-05	0	0	0	0	0	0	0	0	0	0	Bacteria; Planctomycetes; OM190; uncultured bacterium; uncultured bacterium; uncultured bacterium; uncultured bacterium
FJ745063,1,1388	1.17661e-05	6.17196e-05	2.22755e-06	8.58583e-06	0	1.02013e-06	0	0	0	0	0	0	0	0	Bacteria; Verrucomicrobia; Opitutae; Puniceicoccales; Puniceicoccaceae; Coraliomargarita
DQ396124,1,1490	7.35383e-06	5.69719e-05	0	2.08513e-05	0	0	0	0	0	0	0	0	0	0	Bacteria; Proteobacteria; Deltaproteobacteria; Desulfobacterales; Nitrospinaceae; Nitrospina; uncultured bacterium
New,CleanUp,ReferenceOTU237225	2.05907e-05	2.21558e-05	1.78204e-05	2.45309e-05	0	0	0	0	0	0	0	0	0	0	Bacteria; Proteobacteria; Deltaproteobacteria; Myxococcales; 0319-6G20; uncultured bacterium; uncultured bacterium
New,CleanUp,ReferenceOTU415342	8.82459e-06	2.8486e-05	2.67306e-05	2.08513e-05	0	0	0	0	0	0	0	0	0	0	Bacteria; Chloroflexi; SAR202 clade; uncultured bacterium; uncultured bacterium; uncultured bacterium; uncultured bacterium
New,CleanUp,ReferenceOTU998724	5.14768e-05	2.21558e-05	6.68265e-06	2.45309e-06	0	2.04026e-06	0	0	0	0	0	0	0	0	Bacteria; Chloroflexi; SAR202 clade; uncultured bacterium; uncultured bacterium; uncultured bacterium; uncultured bacterium
New,CleanUp,ReferenceOTU575178	2.35322e-05	0	5.79163e-05	1.22655e-06	0	2.04026e-06	0	0	0	0	0	0	0	0	Bacteria; Proteobacteria; Gammaproteobacteria; Alteromonadales; Idiomarinaceae; Idiomarina
New,CleanUp,ReferenceOTU1098835	1.61784e-05	3.00685e-05	7.79643e-06	3.06637e-05	0	0	0	0	0	0	0	0	0	0	Bacteria; Deferribacteres; Deferribacteres; Deferribacterales; SAR406 clade(Marine group A); uncultured bacterium; uncultured bacterium
New,CleanUp,ReferenceOTU693210	5.58891e-05	9.49532e-06	1.89342e-05	0	0	0	0	0	0	0	0	0	0	0	Bacteria; Proteobacteria; Gammaproteobacteria; Oceanospirillales; SUP05 cluster; uncultured bacterium; uncultured bacterium
JX227311,1,1446	3.97107e-05	2.37383e-05	1.22515e-05	8.58583e-06	0	0	0	0	0	0	0	0	0	0	Bacteria; Proteobacteria; Alphaproteobacteria; Rhodospirillales; Rhodospirillaceae; uncultured
New,CleanUp,ReferenceOTU917524	8.82459e-06	3.00685e-05	3.67546e-05	8.58583e-06	0	0	0	0	0	0	0	0	0	0	Bacteria; Chloroflexi; SAR202 clade
New,CleanUp,ReferenceOTU364036	6.61845e-05	9.49532e-06	2.22755e-06	6.13273e-06	0	0	0	0	0	0	0	0	0	0	Bacteria; Proteobacteria; Gammaproteobacteria; Oceanospirillales; SUP05 cluster; uncultured bacterium; uncultured bacterium
New,CleanUp,ReferenceOTU987486	1.47077e-06	0	0	0	0	3.06038e-06	7.91956e-05	0	0	0	0	0	0	0	Bacteria; Proteobacteria; Gammaproteobacteria; Thiotrichales; Thiotrichaceae; uncultured; uncultured bacterium
New,CleanUp,ReferenceOTU476360	2.79445e-05	1.74081e-05	2.11617e-05	1.71717e-05	0	0	0	0	0	0	0	0	0	0	Bacteria; Proteobacteria; Deltaproteobacteria; Myxococcales; uncultured
New,CleanUp,ReferenceOTU173931	2.79445e-05	1.58255e-05	1.89342e-05	1.96248e-05	0	0	1.31993e-06	0	0	0	0	0	0	0	Bacteria; Planctomycetes; Phycisphaerae; Phycisphaerales; Phycisphaeraceae; FS140-16B-02 marine group
HQ242637,1,1436	3.82399e-05	1.58255e-05	1.22515e-05	1.71717e-05	0	0	0	0	0	0	0	0	0	0	Bacteria; Proteobacteria; Alphaproteobacteria; SAR11 clade; Deep 1; uncultured bacterium; uncultured bacterium
HQ242587,1,1485	2.94153e-05	2.21558e-05	0	3.18902e-05	0	0	0	0	0	0	0	0	0	0	Bacteria; Bacteroidetes; Flavobacteriia; Flavobacteriales; NS7 marine group
DQ396094,1,1483	2.94153e-05	2.05732e-05	3.34133e-05	0	0	0	0	0	0	0	0	0	0	0	Bacteria; Proteobacteria; Deltaproteobacteria; SAR324 clade(Marine group B); uncultured bacterium; uncultured bacterium; uncultured bacterium
New,CleanUp,ReferenceOTU255360	1.02954e-05	4.11464e-05	0	3.18902e-05	0	0	0	0	0	0	0	0	0	0	Bacteria; Chloroflexi; SAR202 clade; uncultured Chloroflexus sp,; uncultured Chloroflexus sp,; uncultured Chloroflexus sp,; uncultured Chloroflexus sp,
GQ337234,1,1475	2.79445e-05	2.53209e-05	2.22755e-05	7.35928e-06	0	0	0	0	0	0	0	0	0	0	Bacteria; Chloroflexi; SAR202 clade; uncultured Chloroflexi bacterium; uncultured Chloroflexi bacterium; uncultured Chloroflexi bacterium; uncultured Chloroflexi bacterium
New,CleanUp,ReferenceOTU525420	0	6.33022e-05	1.33653e-05	4.90619e-06	0	0	1.31993e-06	0	0	0	0	0	0	0	Unassigned
New,CleanUp,ReferenceOTU381071	3.23568e-05	1.89906e-05	1.55929e-05	1.59451e-05	0	0	0	0	0	0	0	0	0	0	Bacteria; Acidobacteria; Acidobacteria; Subgroup 6
New,CleanUp,ReferenceOTU836433	1.47077e-06	0	5.12337e-05	0	0	1.02013e-05	1.97989e-05	0	0	0	0	0	0	0	Bacteria; Proteobacteria; Epsilonproteobacteria
HQ673662,1,1479	3.08861e-05	2.05732e-05	1.89342e-05	1.22655e-05	0	0	0	0	0	0	0	0	0	0	Bacteria; Proteobacteria; Deltaproteobacteria; SAR324 clade(Marine group B); uncultured bacterium; uncultured bacterium; uncultured bacterium
EU802670,1,1499	1.32369e-05	5.22243e-05	0	1.10389e-05	0	6.12077e-06	0	0	0	0	0	0	0	0	Bacteria; Proteobacteria; Gammaproteobacteria; Oceanospirillales; SAR86 clade; uncultured bacterium; uncultured bacterium
New,CleanUp,ReferenceOTU784823	1.61784e-05	4.90592e-05	0	1.71717e-05	0	0	0	0	0	0	0	0	0	0	Unassigned
New,ReferenceOTU1261	1.47077e-06	0	8.9102e-06	3.67964e-06	0	2.34629e-05	4.48775e-05	0	0	0	0	0	0	0	Bacteria; Proteobacteria; Gammaproteobacteria; Alteromonadales; Alteromonadaceae; Alteromonas; uncultured bacterium
HQ673852,1,1461	1.912e-05	3.95638e-05	8.9102e-06	1.47186e-05	0	0	0	0	0	0	0	0	0	0	Bacteria; Proteobacteria; Deltaproteobacteria; Bdellovibrionales; Bdellovibrionaceae; OM27 clade
HM117594,1,1358	4.70645e-05	2.53209e-05	0	9.81238e-06	0	0	0	0	0	0	0	0	0	0	Bacteria; Proteobacteria; Alphaproteobacteria; OCS116 clade; uncultured bacterium; uncultured bacterium; uncultured bacterium
New,CleanUp,ReferenceOTU359607	0	1.58255e-06	0	0	0	0	8.05155e-05	0	0	0	0	0	0	0	Bacteria; Candidate division SR1; uncultured bacterium VC2,1 Bac16; uncultured bacterium VC2,1 Bac16; uncultured bacterium VC2,1 Bac16; uncultured bacterium VC2,1 Bac16; uncultured bacterium VC2,1 Bac16
GU941130,1,1401	2.05907e-05	0	6.01439e-05	1.22655e-06	0	0	0	0	0	0	0	0	0	0	Bacteria; Bacteroidetes; Flavobacteriia; Flavobacteriales; Flavobacteriaceae; Leeuwenhoekiella
New,CleanUp,ReferenceOTU1017645	2.5003e-05	1.74081e-05	2.33893e-05	1.59451e-05	0	0	0	0	0	0	0	0	0	0	Bacteria; Chloroflexi; SAR202 clade
New,CleanUp,ReferenceOTU1124866	6.61845e-05	0	4.4551e-06	1.10389e-05	0	0	0	0	0	0	0	0	0	0	Unassigned
U70713,1,1338	0	3.63987e-05	8.9102e-06	4.90619e-06	3.14573e-05	0	0	0	0	0	0	0	0	0	Bacteria; Proteobacteria; Deltaproteobacteria; Bdellovibrionales; Bdellovibrionaceae; OM27 clade; uncultured delta proteobacterium
New,CleanUp,ReferenceOTU498695	1.47077e-05	1.89906e-05	3.56408e-05	1.22655e-05	0	0	0	0	0	0	0	0	0	0	Bacteria; Chloroflexi; SAR202 clade; uncultured bacterium; uncultured bacterium; uncultured bacterium; uncultured bacterium
HQ673770,1,1523	1.47077e-05	3.16511e-05	1.33653e-05	2.08513e-05	0	1.02013e-06	0	0	0	0	0	0	0	0	Bacteria; Deferribacteres; Deferribacteres; Deferribacterales; SAR406 clade(Marine group A); uncultured bacterium; uncultured bacterium
New,CleanUp,ReferenceOTU1013187	2.64738e-05	1.58255e-05	2.56168e-05	1.22655e-05	0	0	1.31993e-06	0	0	0	0	0	0	0	Bacteria; Proteobacteria; Alphaproteobacteria; Rhodospirillales; Rhodospirillaceae; uncultured; uncultured alpha proteobacterium
New,CleanUp,ReferenceOTU856227	3.38276e-05	1.4243e-05	1.33653e-05	1.59451e-05	0	4.08051e-06	0	0	0	0	0	0	0	0	Bacteria; Proteobacteria; Deltaproteobacteria; Myxococcales; Cystobacteraceae; Anaeromyxobacter; uncultured bacterium
New,CleanUp,ReferenceOTU585050	7.35383e-06	5.06417e-05	1.11378e-05	1.22655e-05	0	0	0	0	0	0	0	0	0	0	Bacteria; Proteobacteria; Deltaproteobacteria; Sh765B-TzT-29
New,CleanUp,ReferenceOTU837464	1.912e-05	2.21558e-05	2.89582e-05	9.81238e-06	0	0	1.31993e-06	0	0	0	0	0	0	0	Bacteria; Verrucomicrobia; Opitutae; MB11C04 marine group; uncultured bacterium; uncultured bacterium; uncultured bacterium
JQ678472,1,1522	2.5003e-05	1.4243e-05	3.4527e-05	7.35928e-06	0	0	0	0	0	0	0	0	0	0	Bacteria; Proteobacteria; Deltaproteobacteria; Desulfuromonadales; GR-WP33-58; uncultured bacterium; uncultured bacterium
New,CleanUp,ReferenceOTU495047	1.61784e-05	4.43115e-05	3.34133e-06	1.71717e-05	0	0	0	0	0	0	0	0	0	0	Bacteria; Chloroflexi; SAR202 clade; uncultured bacterium; uncultured bacterium; uncultured bacterium; uncultured bacterium
New,CleanUp,ReferenceOTU1042257	5.29476e-05	1.58255e-06	4.4551e-06	1.96248e-05	0	1.02013e-06	1.31993e-06	0	0	0	0	0	0	0	Bacteria; Proteobacteria; Gammaproteobacteria; Legionellales; Coxiellaceae; Coxiella; uncultured bacterium
New,CleanUp,ReferenceOTU447561	1.76492e-05	2.05732e-05	3.22995e-05	0	0	5.10064e-06	5.27971e-06	0	0	0	0	0	0	0	Bacteria; Proteobacteria; Gammaproteobacteria; Oceanospirillales; SUP05 cluster
New,CleanUp,ReferenceOTU707205	3.38276e-05	2.53209e-05	1.67066e-05	3.67964e-06	0	0	1.31993e-06	0	0	0	0	0	0	0	Bacteria; Chloroflexi; SAR202 clade; uncultured bacterium; uncultured bacterium; uncultured bacterium; uncultured bacterium
New,CleanUp,ReferenceOTU519697	1.17661e-05	2.37383e-05	1.67066e-05	2.45309e-05	0	4.08051e-06	0	0	0	0	0	0	0	0	Bacteria; Planctomycetes; Phycisphaerae; Phycisphaerales; Phycisphaeraceae; Phycisphaera
New,CleanUp,ReferenceOTU310156	4.26522e-05	0	3.56408e-05	2.45309e-06	0	0	0	0	0	0	0	0	0	0	Bacteria; Proteobacteria; Gammaproteobacteria; Alteromonadales; Idiomarinaceae; Idiomarina
New,CleanUp,ReferenceOTU890532	2.20615e-05	0	0	5.76477e-05	0	1.02013e-06	0	0	0	0	0	0	0	0	Bacteria; Bacteroidetes; Flavobacteriia; Flavobacteriales; Flavobacteriaceae; Sufflavibacter
New,CleanUp,ReferenceOTU121734	3.23568e-05	6.33022e-06	2.22755e-05	1.96248e-05	0	0	0	0	0	0	0	0	0	0	Bacteria; Proteobacteria; Alphaproteobacteria; Rhodospirillales; Rhodospirillaceae; uncultured; uncultured bacterium
New,CleanUp,ReferenceOTU567429	2.79445e-05	2.69034e-05	2.45031e-05	1.22655e-06	0	0	0	0	0	0	0	0	0	0	Bacteria; Proteobacteria; Alphaproteobacteria; Rhodospirillales; Rhodospirillaceae; AEGEAN-169 marine group; uncultured bacterium
New,CleanUp,ReferenceOTU1106598	1.61784e-05	1.74081e-05	2.22755e-05	2.33044e-05	0	0	1.31993e-06	0	0	0	0	0	0	0	Bacteria; Proteobacteria; Deltaproteobacteria; GR-WP33-30; uncultured bacterium; uncultured bacterium; uncultured bacterium
New,CleanUp,ReferenceOTU444076	1.32369e-05	4.11464e-05	1.0024e-05	1.59451e-05	0	0	0	0	0	0	0	0	0	0	Bacteria; Gemmatimonadetes; Gemmatimonadetes; BD2-11 terrestrial group; uncultured bacterium; uncultured bacterium; uncultured bacterium
New,ReferenceOTU1153	1.32369e-05	3.79813e-05	4.4551e-06	2.45309e-05	0	0	0	0	0	0	0	0	0	0	Bacteria; Proteobacteria; Deltaproteobacteria; Desulfobacterales; Nitrospinaceae; Nitrospina; uncultured delta proteobacterium
New,CleanUp,ReferenceOTU450187	2.35322e-05	2.21558e-05	8.9102e-06	2.45309e-05	0	1.02013e-06	0	0	0	0	0	0	0	0	Unassigned
New,CleanUp,ReferenceOTU1141221	5.29476e-05	7.91277e-06	1.55929e-05	3.67964e-06	0	0	0	0	0	0	0	0	0	0	Bacteria; Planctomycetes; OM190
AM934825,1,1337	1.912e-05	2.21558e-05	2.89582e-05	9.81238e-06	0	0	0	0	0	0	0	0	0	0	Bacteria; Chloroflexi; JG30-KF-CM66
GQ246386,1,1492	2.35322e-05	3.32336e-05	1.33653e-05	8.58583e-06	0	0	1.31993e-06	0	0	0	0	0	0	0	Bacteria; Bacteroidetes; BD2-2; uncultured bacterium; uncultured bacterium; uncultured bacterium; uncultured bacterium
New,CleanUp,ReferenceOTU1000556	2.5003e-05	2.21558e-05	1.44791e-05	1.83982e-05	0	0	0	0	0	0	0	0	0	0	Bacteria; Proteobacteria; Alphaproteobacteria; SAR11 clade; Deep 1
New,CleanUp,ReferenceOTU1079164	2.94153e-05	0	3.34133e-05	1.71717e-05	0	0	0	0	0	0	0	0	0	0	Bacteria; Proteobacteria; Gammaproteobacteria; Alteromonadales; Alteromonadaceae; Salinimonas
New,CleanUp,ReferenceOTU734718	8.82459e-06	3.16511e-05	1.11378e-05	2.6984e-05	0	0	1.31993e-06	0	0	0	0	0	0	0	Bacteria; Verrucomicrobia; Verrucomicrobiae; Verrucomicrobiales; DEV007; uncultured bacterium; uncultured bacterium
JN409122,1,1409	2.79445e-05	2.21558e-05	1.78204e-05	8.58583e-06	0	2.04026e-06	1.31993e-06	0	0	0	0	0	0	0	Bacteria; Proteobacteria; Alphaproteobacteria; Sphingomonadales; Erythrobacteraceae; Altererythrobacter; uncultured bacterium
New,CleanUp,ReferenceOTU260151	0	6.80498e-05	0	8.58583e-06	0	3.06038e-06	0	0	0	0	0	0	0	0	Bacteria; Proteobacteria; Deltaproteobacteria; Sh765B-TzT-29; uncultured bacterium; uncultured bacterium; uncultured bacterium
New,CleanUp,ReferenceOTU965418	2.94153e-06	0	1.11378e-06	0	0	4.38655e-05	3.16782e-05	0	0	0	0	0	0	0	Bacteria; Proteobacteria; Gammaproteobacteria; Oceanospirillales
AB750567,1,1490	1.17661e-05	4.58941e-05	5.56888e-06	1.22655e-05	0	4.08051e-06	0	0	0	0	0	0	0	0	Bacteria; Actinobacteria; Acidimicrobiia; Acidimicrobiales; OM1 clade; uncultured bacterium; uncultured bacterium
EU506968,1,1277	4.4123e-05	6.33022e-06	0	0	0	0	2.90384e-05	0	0	0	0	0	0	0	Bacteria; Proteobacteria; Alphaproteobacteria; Rhizobiales; Methylobacteriaceae; Methylobacterium; uncultured bacterium
New,CleanUp,ReferenceOTU737580	3.38276e-05	2.05732e-05	6.68265e-06	1.83982e-05	0	0	0	0	0	0	0	0	0	0	Bacteria; Proteobacteria; Deltaproteobacteria; Bdellovibrionales; Bdellovibrionaceae; OM27 clade; uncultured bacterium
New,CleanUp,ReferenceOTU40318	7.35383e-06	1.89906e-05	2.11617e-05	3.18902e-05	0	0	0	0	0	0	0	0	0	0	Bacteria; Deferribacteres; Deferribacteres; Deferribacterales; SAR406 clade(Marine group A)
JN018797,1,1390	7.35383e-06	4.43115e-05	6.68265e-06	2.08513e-05	0	0	0	0	0	0	0	0	0	0	Bacteria; Verrucomicrobia; Arctic97B-4 marine group
JQ221333,1,916	1.32369e-05	2.53209e-05	1.89342e-05	1.96248e-05	0	2.04026e-06	0	0	0	0	0	0	0	0	Archaea; Thaumarchaeota; Marine Group I; uncultured marine archaeon; uncultured marine archaeon; uncultured marine archaeon; uncultured marine archaeon
JX945360,1,1486	5.29476e-05	1.74081e-05	0	8.58583e-06	0	0	0	0	0	0	0	0	0	0	Bacteria; Bacteroidetes; Flavobacteriia; Flavobacteriales; Flavobacteriaceae
HQ672693,1,1437	2.20615e-05	4.74766e-05	4.4551e-06	4.90619e-06	0	0	0	0	0	0	0	0	0	0	Bacteria; Proteobacteria; Alphaproteobacteria; SAR11 clade; Deep 1; uncultured bacterium; uncultured bacterium
New,CleanUp,ReferenceOTU1090920	4.55937e-05	9.49532e-06	7.79643e-06	1.59451e-05	0	0	0	0	0	0	0	0	0	0	Bacteria; Proteobacteria; Deltaproteobacteria; Desulfuromonadales; GR-WP33-58; uncultured bacterium; uncultured bacterium
AJ567610,1,1485	2.5003e-05	2.37383e-05	1.78204e-05	1.22655e-05	0	0	0	0	0	0	0	0	0	0	Bacteria; Chloroflexi; SAR202 clade
New,CleanUp,ReferenceOTU766068	1.47077e-05	3.48162e-05	1.0024e-05	1.71717e-05	0	2.04026e-06	0	0	0	0	0	0	0	0	Bacteria; Proteobacteria; Deltaproteobacteria; Sh765B-TzT-29; uncultured bacterium; uncultured bacterium; uncultured bacterium
New,CleanUp,ReferenceOTU1025036	1.17661e-05	3.95638e-05	7.79643e-06	1.96248e-05	0	0	0	0	0	0	0	0	0	0	Bacteria; Gemmatimonadetes; Gemmatimonadetes; BD2-11 terrestrial group; uncultured bacterium; uncultured bacterium; uncultured bacterium
FJ487526,1,1439	2.35322e-05	1.58255e-05	2.11617e-05	7.35928e-06	1.08473e-05	0	0	0	0	0	0	0	0	0	Archaea; Thaumarchaeota; Marine Group I; Unknown Order; Unknown Family; Candidatus Nitrosopumilus
HM798950,1,1494	3.97107e-05	3.16511e-06	3.4527e-05	1.22655e-06	0	0	0	0	0	0	0	0	0	0	Bacteria; Planctomycetes; OM190; uncultured bacterium; uncultured bacterium; uncultured bacterium; uncultured bacterium
HQ672795,1,1489	3.67691e-05	1.74081e-05	1.33653e-05	1.10389e-05	0	0	0	0	0	0	0	0	0	0	Bacteria; Proteobacteria; Deltaproteobacteria; SAR324 clade(Marine group B); uncultured bacterium; uncultured bacterium; uncultured bacterium
New,CleanUp,ReferenceOTU376471	2.5003e-05	2.05732e-05	1.33653e-05	1.96248e-05	0	0	0	0	0	0	0	0	0	0	Bacteria; Proteobacteria; Deltaproteobacteria; Myxococcales; uncultured; uncultured bacterium; uncultured bacterium
New,CleanUp,ReferenceOTU581122	3.08861e-05	1.74081e-05	1.67066e-05	1.3492e-05	0	0	0	0	0	0	0	0	0	0	Bacteria; Proteobacteria; Deltaproteobacteria; SAR324 clade(Marine group B); uncultured bacterium; uncultured bacterium; uncultured bacterium
New,CleanUp,ReferenceOTU575488	1.47077e-05	5.38068e-05	0	9.81238e-06	0	0	0	0	0	0	0	0	0	0	Bacteria; Verrucomicrobia; Arctic97B-4 marine group
New,CleanUp,ReferenceOTU884514	1.47077e-06	0	7.57367e-05	0	1.08473e-06	0	0	0	0	0	0	0	0	0	Bacteria; Proteobacteria; Gammaproteobacteria; Oceanospirillales; Halomonadaceae; Halomonas
HQ163764,1,1379	3.97107e-05	3.16511e-06	7.79643e-06	9.81238e-06	0	7.1409e-06	1.05594e-05	0	0	0	0	0	0	0	Bacteria; Proteobacteria; Gammaproteobacteria; Oceanospirillales; SUP05 cluster; uncultured gamma proteobacterium; uncultured gamma proteobacterium
New,CleanUp,ReferenceOTU649016	2.94153e-06	5.06417e-05	0	2.45309e-05	0	0	0	0	0	0	0	0	0	0	Bacteria; Proteobacteria; Deltaproteobacteria; Myxococcales; uncultured; uncultured bacterium; uncultured bacterium
New,ReferenceOTU1362	4.55937e-05	1.4243e-05	7.79643e-06	7.35928e-06	0	3.06038e-06	0	0	0	0	0	0	0	0	Bacteria; Proteobacteria; Gammaproteobacteria; Oceanospirillales; SUP05 cluster; uncultured bacterium; uncultured bacterium
New,CleanUp,ReferenceOTU240498	1.61784e-05	2.53209e-05	1.89342e-05	1.71717e-05	0	0	0	0	0	0	0	0	0	0	Bacteria; Deferribacteres; Deferribacteres; Deferribacterales; SAR406 clade(Marine group A); uncultured bacterium; uncultured bacterium
DQ915625,1,1309	7.35383e-05	0	0	0	0	0	3.95978e-06	0	0	0	0	0	0	0	Bacteria; Proteobacteria; Alphaproteobacteria; Rhodobacterales; Rhodobacteraceae; Roseovarius
New,CleanUp,ReferenceOTU777982	2.20615e-05	1.58255e-06	3.89821e-05	1.47186e-05	0	0	0	0	0	0	0	0	0	0	Bacteria; Chlamydiae; Chlamydiae; Chlamydiales; Simkaniaceae; uncultured; uncultured bacterium
HQ671759,1,1515	2.05907e-05	2.37383e-05	1.33653e-05	1.96248e-05	0	0	0	0	0	0	0	0	0	0	Bacteria; Proteobacteria; Deltaproteobacteria; Myxococcales; 0319-6G20
New,CleanUp,ReferenceOTU754162	2.35322e-05	2.21558e-05	2.78444e-05	3.67964e-06	0	0	0	0	0	0	0	0	0	0	Bacteria; Proteobacteria; Deltaproteobacteria; SAR324 clade(Marine group B); uncultured bacterium; uncultured bacterium; uncultured bacterium
New,CleanUp,ReferenceOTU291803	5.88306e-06	1.74081e-05	1.11378e-06	5.27415e-05	0	0	0	0	0	0	0	0	0	0	Bacteria; Chloroflexi; SAR202 clade; uncultured bacterium; uncultured bacterium; uncultured bacterium; uncultured bacterium
New,CleanUp,ReferenceOTU843480	3.52984e-05	2.21558e-05	1.22515e-05	7.35928e-06	0	0	0	0	0	0	0	0	0	0	Bacteria; Proteobacteria; Deltaproteobacteria; SAR324 clade(Marine group B); uncultured bacterium; uncultured bacterium; uncultured bacterium
HQ673249,1,1460	2.20615e-05	2.69034e-05	1.33653e-05	1.47186e-05	0	0	0	0	0	0	0	0	0	0	Bacteria; Proteobacteria; Alphaproteobacteria; SAR11 clade; Deep 1; uncultured bacterium; uncultured bacterium
New,CleanUp,ReferenceOTU1090410	0	2.37383e-05	4.00959e-05	1.10389e-05	2.16947e-06	0	0	0	0	0	0	0	0	0	Bacteria; Chloroflexi; KD4-96; uncultured bacterium; uncultured bacterium; uncultured bacterium; uncultured bacterium
New,CleanUp,ReferenceOTU964256	0	4.43115e-05	5.56888e-06	1.96248e-05	0	6.12077e-06	1.31993e-06	0	0	0	0	0	0	0	Bacteria; Spirochaetae; Spirochaetes; Spirochaetales; Spirochaetaceae; Spirochaeta
KC002116,1,1313	1.47077e-06	0	7.12816e-05	0	0	4.08051e-06	0	0	0	0	0	0	0	0	Bacteria; Proteobacteria; Alphaproteobacteria; Rhodobacterales; Rhodobacteraceae; Ruegeria
New,CleanUp,ReferenceOTU1122621	3.97107e-05	0	2.11617e-05	1.59451e-05	0	0	0	0	0	0	0	0	0	0	Bacteria; Planctomycetes; Phycisphaerae; Phycisphaerales; Phycisphaeraceae; JL-ETNP-F27; uncultured planctomycete
New,CleanUp,ReferenceOTU199561	4.4123e-06	2.53209e-05	2.0048e-05	2.6984e-05	0	0	0	0	0	0	0	0	0	0	Bacteria; Proteobacteria; Deltaproteobacteria; Myxococcales; uncultured
HQ673863,1,1457	8.82459e-06	1.74081e-05	2.33893e-05	2.20778e-05	0	1.02013e-06	3.95978e-06	0	0	0	0	0	0	0	Bacteria; Deferribacteres; Deferribacteres; Deferribacterales; SAR406 clade(Marine group A); uncultured bacterium; uncultured bacterium
New,CleanUp,ReferenceOTU289905	0	6.64673e-05	8.9102e-06	1.22655e-06	0	0	0	0	0	0	0	0	0	0	Bacteria; Proteobacteria; Alphaproteobacteria; Rhodobacterales; Rhodobacteraceae; Defluviimonas; uncultured bacterium
AB682656,1,1468	3.23568e-05	0	2.89582e-05	1.22655e-06	1.08473e-05	3.06038e-06	0	0	0	0	0	0	0	0	Bacteria; Proteobacteria; Gammaproteobacteria; Alteromonadales; Pseudoalteromonadaceae; Pseudoalteromonas
New,CleanUp,ReferenceOTU676390	0	5.06417e-05	0	2.57575e-05	0	0	0	0	0	0	0	0	0	0	Bacteria; Acidobacteria; Acidobacteria; Subgroup 6; uncultured bacterium; uncultured bacterium; uncultured bacterium
New,CleanUp,ReferenceOTU1024718	1.17661e-05	3.48162e-05	8.9102e-06	2.08513e-05	0	0	0	0	0	0	0	0	0	0	Bacteria; Planctomycetes; Pla3 lineage; uncultured bacterium; uncultured bacterium; uncultured bacterium; uncultured bacterium
New,CleanUp,ReferenceOTU1116547	4.85353e-05	2.53209e-05	0	2.45309e-06	0	0	0	0	0	0	0	0	0	0	Bacteria; Chloroflexi; SAR202 clade; uncultured bacterium; uncultured bacterium; uncultured bacterium; uncultured bacterium
HQ672501,1,1434	2.20615e-05	2.53209e-05	1.78204e-05	1.10389e-05	0	0	0	0	0	0	0	0	0	0	Bacteria; Proteobacteria; Alphaproteobacteria; SAR11 clade; Deep 1; uncultured SAR11 cluster alpha proteobacterium; uncultured SAR11 cluster alpha proteobacterium
ABEF01047195,1,1358	3.08861e-05	1.4243e-05	1.89342e-05	9.81238e-06	0	1.02013e-06	1.31993e-06	0	0	0	0	0	0	0	Bacteria; Deferribacteres; Deferribacteres; Deferribacterales; SAR406 clade(Marine group A); uncultured Marinimicrobia bacterium; uncultured Marinimicrobia bacterium
HQ433385,1,1388	2.35322e-05	6.33022e-06	4.34372e-05	2.45309e-06	0	0	0	0	0	0	0	0	0	0	Bacteria; Bacteroidetes; Flavobacteriia; Flavobacteriales; NS9 marine group; uncultured bacterium; uncultured bacterium
New,CleanUp,ReferenceOTU919827	0	3.32336e-05	5.56888e-06	3.67964e-05	0	0	0	0	0	0	0	0	0	0	Bacteria; Chloroflexi; SAR202 clade; uncultured bacterium; uncultured bacterium; uncultured bacterium; uncultured bacterium
EU686635,915,2415	1.76492e-05	2.05732e-05	7.79643e-06	2.94371e-05	0	0	0	0	0	0	0	0	0	0	Archaea; Thaumarchaeota; pSL12; uncultured marine crenarchaeote AD1000-23-H12; uncultured marine crenarchaeote AD1000-23-H12; uncultured marine crenarchaeote AD1000-23-H12; uncultured marine crenarchaeote AD1000-23-H12
New,CleanUp,ReferenceOTU778540	2.35322e-05	1.26604e-05	1.22515e-05	2.6984e-05	0	0	0	0	0	0	0	0	0	0	Bacteria; Chloroflexi; SAR202 clade
New,CleanUp,ReferenceOTU656804	2.94153e-06	0	0	0	0	1.42818e-05	5.80768e-05	0	0	0	0	0	0	0	Bacteria; Proteobacteria; Epsilonproteobacteria; Campylobacterales; Helicobacteraceae; Sulfurimonas
AM997485,1,1473	2.79445e-05	1.58255e-05	1.67066e-05	1.3492e-05	0	0	1.31993e-06	0	0	0	0	0	0	0	Bacteria; Chloroflexi; SAR202 clade; uncultured deep-sea bacterium; uncultured deep-sea bacterium; uncultured deep-sea bacterium; uncultured deep-sea bacterium
New,CleanUp,ReferenceOTU208451	2.79445e-05	4.74766e-06	2.78444e-05	1.47186e-05	0	0	0	0	0	0	0	0	0	0	Bacteria; Proteobacteria; Gammaproteobacteria; Alteromonadales; Idiomarinaceae; Idiomarina
HQ673274,1,1511	1.47077e-05	2.37383e-05	1.44791e-05	2.08513e-05	0	0	1.31993e-06	0	0	0	0	0	0	0	Bacteria; Deferribacteres; Deferribacteres; Deferribacterales; SAR406 clade(Marine group A); uncultured bacterium; uncultured bacterium
New,CleanUp,ReferenceOTU1002252	1.912e-05	2.53209e-05	1.22515e-05	1.83982e-05	0	0	0	0	0	0	0	0	0	0	Bacteria; Chloroflexi; SAR202 clade
JF809764,1,1421	1.02954e-05	3.16511e-05	2.22755e-05	9.81238e-06	0	1.02013e-06	0	0	0	0	0	0	0	0	Bacteria; Gemmatimonadetes; Gemmatimonadetes; BD2-11 terrestrial group; uncultured bacterium; uncultured bacterium; uncultured bacterium
New,CleanUp,ReferenceOTU798304	7.5009e-05	0	0	0	0	0	0	0	0	0	0	0	0	0	Bacteria; Proteobacteria; Alphaproteobacteria; Sphingomonadales; Erythrobacteraceae; Altererythrobacter
New,CleanUp,ReferenceOTU605524	2.79445e-05	1.58255e-06	3.56408e-05	9.81238e-06	0	0	0	0	0	0	0	0	0	0	Bacteria; Proteobacteria; Gammaproteobacteria; Alteromonadales; Idiomarinaceae; Idiomarina
New,CleanUp,ReferenceOTU655804	5.88306e-06	0	6.90541e-05	0	0	0	0	0	0	0	0	0	0	0	Bacteria; Bacteroidetes; Flavobacteriia; Flavobacteriales; Flavobacteriaceae; Leeuwenhoekiella
EU802945,1,1378	1.02954e-05	5.22243e-05	0	1.10389e-05	0	0	1.31993e-06	0	0	0	0	0	0	0	Bacteria; Proteobacteria; Alphaproteobacteria; Rickettsiales; S25-593; uncultured bacterium; uncultured bacterium
HQ673321,1,1515	5.14768e-05	0	2.33893e-05	0	0	0	0	0	0	0	0	0	0	0	Bacteria; Proteobacteria; Gammaproteobacteria; Oceanospirillales
HQ674334,1,1520	2.20615e-05	2.05732e-05	8.9102e-06	2.33044e-05	0	0	0	0	0	0	0	0	0	0	Bacteria; Deferribacteres; Deferribacteres; Deferribacterales; SAR406 clade(Marine group A); uncultured bacterium; uncultured bacterium
GQ347993,1,1379	2.79445e-05	2.8486e-05	0	1.83982e-05	0	0	0	0	0	0	0	0	0	0	Bacteria; Bacteroidetes; Flavobacteriia; Flavobacteriales; Flavobacteriaceae; NS4 marine group
New,CleanUp,ReferenceOTU322849	3.08861e-05	1.4243e-05	1.0024e-05	1.96248e-05	0	0	0	0	0	0	0	0	0	0	Unassigned
New,CleanUp,ReferenceOTU98839	0	6.48847e-05	0	9.81238e-06	0	0	0	0	0	0	0	0	0	0	Bacteria; Proteobacteria; Deltaproteobacteria; Sh765B-TzT-29; uncultured bacterium; uncultured bacterium; uncultured bacterium
New,ReferenceOTU1485	1.76492e-05	4.58941e-05	1.11378e-06	7.35928e-06	0	0	2.63985e-06	0	0	0	0	0	0	0	Bacteria; Chloroflexi; S085; uncultured bacterium; uncultured bacterium; uncultured bacterium; uncultured bacterium
HQ672435,1,1446	1.17661e-05	3.79813e-05	8.9102e-06	1.59451e-05	0	0	0	0	0	0	0	0	0	0	Bacteria; Proteobacteria; Alphaproteobacteria; SAR11 clade; Deep 1; uncultured SAR11 cluster alpha proteobacterium; uncultured SAR11 cluster alpha proteobacterium
DQ396275,1,1494	3.23568e-05	2.21558e-05	5.56888e-06	6.13273e-06	0	3.06038e-06	5.27971e-06	0	0	0	0	0	0	0	Bacteria; Proteobacteria; Alphaproteobacteria; Rhodospirillales; Rhodospirillaceae; Defluviicoccus; uncultured bacterium
New,CleanUp,ReferenceOTU930414	1.17661e-05	3.16511e-05	7.79643e-06	2.33044e-05	0	0	0	0	0	0	0	0	0	0	Bacteria; Chloroflexi; Anaerolineae; Anaerolineales; Anaerolineaceae; uncultured
New,CleanUp,ReferenceOTU227395	3.23568e-05	1.10779e-05	1.89342e-05	1.10389e-05	0	1.02013e-06	0	0	0	0	0	0	0	0	Bacteria; Proteobacteria; Deltaproteobacteria; Desulfurellales; Desulfurellaceae; uncultured; uncultured bacterium
New,CleanUp,ReferenceOTU218594	2.05907e-05	3.16511e-05	1.11378e-05	1.10389e-05	0	0	0	0	0	0	0	0	0	0	Bacteria; Chloroflexi; SAR202 clade; uncultured Chloroflexi bacterium; uncultured Chloroflexi bacterium; uncultured Chloroflexi bacterium; uncultured Chloroflexi bacterium
New,CleanUp,ReferenceOTU1098890	5.88306e-06	3.48162e-05	1.67066e-05	1.47186e-05	0	2.04026e-06	0	0	0	0	0	0	0	0	Bacteria; Chloroflexi; SAR202 clade
New,CleanUp,ReferenceOTU1050047	1.32369e-05	5.06417e-05	7.79643e-06	2.45309e-06	0	0	0	0	0	0	0	0	0	0	Unassigned
New,CleanUp,ReferenceOTU399902	2.35322e-05	1.10779e-05	2.33893e-05	1.47186e-05	0	0	1.31993e-06	0	0	0	0	0	0	0	Archaea; Euryarchaeota; Thermoplasmata; Thermoplasmatales; Marine Group III
New,CleanUp,ReferenceOTU110728	2.05907e-05	1.58255e-05	2.89582e-05	8.58583e-06	0	0	0	0	0	0	0	0	0	0	Bacteria; Chloroflexi; SAR202 clade; uncultured Chloroflexi bacterium; uncultured Chloroflexi bacterium; uncultured Chloroflexi bacterium; uncultured Chloroflexi bacterium
New,CleanUp,ReferenceOTU962192	1.61784e-05	3.16511e-05	8.9102e-06	1.71717e-05	0	0	0	0	0	0	0	0	0	0	Bacteria; Gemmatimonadetes; Gemmatimonadetes; BD2-11 terrestrial group
New,CleanUp,ReferenceOTU333729	2.79445e-05	2.53209e-05	1.44791e-05	6.13273e-06	0	0	0	0	0	0	0	0	0	0	Unassigned
HQ672805,1,1482	2.94153e-05	2.69034e-05	6.68265e-06	8.58583e-06	0	2.04026e-06	0	0	0	0	0	0	0	0	Bacteria; Chloroflexi; SAR202 clade; uncultured bacterium; uncultured bacterium; uncultured bacterium; uncultured bacterium
AACY023372270,147,1550	5.88306e-06	4.11464e-05	4.4551e-06	2.20778e-05	0	0	0	0	0	0	0	0	0	0	Bacteria; Proteobacteria; Gammaproteobacteria; Thiotrichales; Thiotrichales Incertae Sedis; Candidatus Endoecteinascidia
New,ReferenceOTU1950	1.32369e-05	4.11464e-05	1.67066e-05	2.45309e-06	0	0	0	0	0	0	0	0	0	0	Unassigned
New,CleanUp,ReferenceOTU274882	0	3.16511e-06	0	0	0	3.06038e-06	6.73162e-05	0	0	0	0	0	0	0	Bacteria; Proteobacteria; Gammaproteobacteria; Alteromonadales; Colwelliaceae; Colwellia; uncultured bacterium
FJ192185,1,1426	0	5.85545e-05	0	9.81238e-06	0	5.10064e-06	0	0	0	0	0	0	0	0	Bacteria; Proteobacteria; Alphaproteobacteria; Sphingomonadales; Sphingomonadaceae; Sphingobium
New,CleanUp,ReferenceOTU624017	2.5003e-05	2.69034e-05	1.78204e-05	3.67964e-06	0	0	0	0	0	0	0	0	0	0	Bacteria; Chloroflexi; SAR202 clade; uncultured bacterium; uncultured bacterium; uncultured bacterium; uncultured bacterium
New,CleanUp,ReferenceOTU559804	1.76492e-05	3.00685e-05	1.44791e-05	1.10389e-05	0	0	0	0	0	0	0	0	0	0	Bacteria; Proteobacteria; Deltaproteobacteria; Bdellovibrionales; Bdellovibrionaceae; OM27 clade; uncultured delta proteobacterium
New,CleanUp,ReferenceOTU1114699	1.17661e-05	3.95638e-05	3.34133e-06	1.83982e-05	0	0	0	0	0	0	0	0	0	0	Bacteria; Chloroflexi; SAR202 clade; uncultured bacterium; uncultured bacterium; uncultured bacterium; uncultured bacterium
New,CleanUp,ReferenceOTU908328	1.32369e-05	3.79813e-05	1.44791e-05	7.35928e-06	0	0	0	0	0	0	0	0	0	0	Bacteria; Proteobacteria; Deltaproteobacteria; Myxococcales; uncultured
New,CleanUp,ReferenceOTU750052	2.79445e-05	2.05732e-05	2.45031e-05	0	0	0	0	0	0	0	0	0	0	0	Bacteria; Chloroflexi; SAR202 clade
New,CleanUp,ReferenceOTU1002177	0	5.69719e-05	1.11378e-06	1.47186e-05	0	0	0	0	0	0	0	0	0	0	Bacteria; Verrucomicrobia; Opitutae; Opitutales; Opitutaceae; Opitutus; uncultured bacterium
CP003236,2706986,2708474	0	7.27975e-05	0	0	0	0	0	0	0	0	0	0	0	0	Bacteria; Proteobacteria; Alphaproteobacteria; Rhodospirillales; Rhodospirillaceae; Tistrella
New,CleanUp,ReferenceOTU915317	1.76492e-05	2.37383e-05	3.11857e-05	0	0	0	0	0	0	0	0	0	0	0	Bacteria; Gemmatimonadetes; Gemmatimonadetes; Gemmatimonadales; Gemmatimonadaceae; uncultured; uncultured bacterium
AY726857,1,1236	1.912e-05	3.16511e-05	1.55929e-05	6.13273e-06	0	0	0	0	0	0	0	0	0	0	Bacteria; Proteobacteria; Gammaproteobacteria; Oceanospirillales; Halomonadaceae; Halomonas
New,CleanUp,ReferenceOTU571790	2.20615e-05	1.89906e-05	2.89582e-05	2.45309e-06	0	0	0	0	0	0	0	0	0	0	Unassigned
GU567980,30532,32052	1.17661e-05	3.16511e-05	1.78204e-05	8.58583e-06	0	0	2.63985e-06	0	0	0	0	0	0	0	Bacteria; Gemmatimonadetes; Gemmatimonadetes; BD2-11 terrestrial group
New,CleanUp,ReferenceOTU341598	1.32369e-05	0	2.89582e-05	9.81238e-06	0	1.63221e-05	3.95978e-06	0	0	0	0	0	0	0	Bacteria; Proteobacteria; Gammaproteobacteria; Alteromonadales; Alteromonadaceae
New,CleanUp,ReferenceOTU19417	2.94153e-05	1.26604e-05	3.00719e-05	0	0	0	0	0	0	0	0	0	0	0	Archaea; Euryarchaeota; Thermoplasmata; Thermoplasmatales; Marine Group II; uncultured marine archaeon; uncultured marine archaeon
New,CleanUp,ReferenceOTU1017494	6.17722e-05	0	6.68265e-06	3.67964e-06	0	0	0	0	0	0	0	0	0	0	Bacteria; Proteobacteria; Alphaproteobacteria; SAR11 clade; Surface 1
New,CleanUp,ReferenceOTU938555	7.20675e-05	0	0	0	0	0	0	0	0	0	0	0	0	0	Bacteria; Proteobacteria; Gammaproteobacteria; Oceanospirillales; Halomonadaceae; Halomonas
New,CleanUp,ReferenceOTU810264	2.05907e-05	2.37383e-05	1.78204e-05	9.81238e-06	0	0	0	0	0	0	0	0	0	0	Bacteria; Chloroflexi; JG30-KF-CM66
JF809756,1,1411	4.4123e-06	5.22243e-05	4.4551e-06	9.81238e-06	0	1.02013e-06	0	0	0	0	0	0	0	0	Bacteria; Gemmatimonadetes; Gemmatimonadetes; Gemmatimonadales; Gemmatimonadaceae; uncultured; uncultured bacterium
New,CleanUp,ReferenceOTU683765	3.97107e-05	4.74766e-06	2.22755e-05	2.45309e-06	0	0	2.63985e-06	0	0	0	0	0	0	0	Bacteria; Proteobacteria; Epsilonproteobacteria; Campylobacterales; Helicobacteraceae; Sulfurimonas; uncultured epsilon proteobacterium
New,CleanUp,ReferenceOTU9972	7.05967e-05	0	1.11378e-06	0	0	0	0	0	0	0	0	0	0	0	Bacteria; Proteobacteria; Gammaproteobacteria; Oceanospirillales; SUP05 cluster; uncultured gamma proteobacterium; uncultured gamma proteobacterium
New,CleanUp,ReferenceOTU656004	2.94153e-05	1.58255e-06	3.78684e-05	1.22655e-06	0	0	1.31993e-06	0	0	0	0	0	0	0	Bacteria; Planctomycetes; Planctomycetacia; Planctomycetales; Planctomycetaceae; Rhodopirellula
JN018970,1,1370	1.32369e-05	2.53209e-05	5.56888e-06	2.33044e-05	0	0	3.95978e-06	0	0	0	0	0	0	0	Bacteria; Chloroflexi; SAR202 clade; uncultured bacterium; uncultured bacterium; uncultured bacterium; uncultured bacterium
GQ337095,1,1485	1.32369e-05	1.89906e-05	2.22755e-05	1.3492e-05	0	2.04026e-06	1.31993e-06	0	0	0	0	0	0	0	Bacteria; Proteobacteria; Deltaproteobacteria; SAR324 clade(Marine group B); uncultured bacterium; uncultured bacterium; uncultured bacterium
New,CleanUp,ReferenceOTU786826	1.912e-05	2.05732e-05	3.34133e-06	2.6984e-05	0	0	1.31993e-06	0	0	0	0	0	0	0	Bacteria; Chloroflexi; SAR202 clade; uncultured bacterium; uncultured bacterium; uncultured bacterium; uncultured bacterium
New,ReferenceOTU255	2.20615e-05	1.74081e-05	1.33653e-05	1.83982e-05	0	0	0	0	0	0	0	0	0	0	Bacteria; Chloroflexi; SAR202 clade
New,CleanUp,ReferenceOTU633638	1.47077e-05	2.53209e-05	3.11857e-05	0	0	0	0	0	0	0	0	0	0	0	Bacteria; Chloroflexi; SAR202 clade; uncultured bacterium; uncultured bacterium; uncultured bacterium; uncultured bacterium
New,CleanUp,ReferenceOTU583136	1.32369e-05	4.2729e-05	1.11378e-05	0	0	4.08051e-06	0	0	0	0	0	0	0	0	Bacteria; Chloroflexi; SAR202 clade; uncultured Chloroflexus sp,; uncultured Chloroflexus sp,; uncultured Chloroflexus sp,; uncultured Chloroflexus sp,
DQ300523,1,1273	1.76492e-05	3.16511e-05	1.0024e-05	9.81238e-06	0	2.04026e-06	0	0	0	0	0	0	0	0	Archaea; Thaumarchaeota; Marine Group I; uncultured marine archaeon; uncultured marine archaeon; uncultured marine archaeon; uncultured marine archaeon
New,CleanUp,ReferenceOTU158560	8.82459e-06	2.37383e-05	1.89342e-05	1.96248e-05	0	0	0	0	0	0	0	0	0	0	Bacteria; Proteobacteria; Deltaproteobacteria; Myxococcales; 0319-6G20
New,CleanUp,ReferenceOTU108278	2.79445e-05	0	2.22755e-05	2.08513e-05	0	0	0	0	0	0	0	0	0	0	Bacteria; Proteobacteria; Gammaproteobacteria; Alteromonadales; Alteromonadaceae; Alteromonas
JQ659713,1,1464	0	6.48847e-05	0	6.13273e-06	0	0	0	0	0	0	0	0	0	0	Bacteria; Proteobacteria; Gammaproteobacteria; Pseudomonadales; Pseudomonadaceae; Pseudomonas; uncultured bacterium
FJ745213,1,1376	4.4123e-05	1.26604e-05	3.34133e-06	9.81238e-06	0	1.02013e-06	0	0	0	0	0	0	0	0	Bacteria; Proteobacteria; Gammaproteobacteria; Oceanospirillales; Oceanospirillaceae; Pseudospirillum
New,CleanUp,ReferenceOTU1023094	2.05907e-05	9.49532e-06	2.11617e-05	1.96248e-05	0	0	0	0	0	0	0	0	0	0	Unassigned
New,CleanUp,ReferenceOTU271514	1.02954e-05	3.95638e-05	1.11378e-05	9.81238e-06	0	0	0	0	0	0	0	0	0	0	Bacteria; Proteobacteria; Alphaproteobacteria; Rhodospirillales; Rhodospirillaceae; AEGEAN-169 marine group; uncultured bacterium
New,ReferenceOTU15	1.02954e-05	2.8486e-05	1.11378e-05	2.08513e-05	0	0	0	0	0	0	0	0	0	0	Bacteria; Chloroflexi; SAR202 clade; uncultured bacterium; uncultured bacterium; uncultured bacterium; uncultured bacterium
New,CleanUp,ReferenceOTU60724	4.4123e-06	5.22243e-05	6.68265e-06	7.35928e-06	0	0	0	0	0	0	0	0	0	0	Bacteria; Chloroflexi; uncultured; uncultured bacterium; uncultured bacterium; uncultured bacterium; uncultured bacterium
New,CleanUp,ReferenceOTU1094500	3.52984e-05	1.58255e-05	1.33653e-05	6.13273e-06	0	0	0	0	0	0	0	0	0	0	Bacteria; Deferribacteres; Deferribacteres; Deferribacterales; SAR406 clade(Marine group A); uncultured bacterium; uncultured bacterium
FR853436,1,1503	0	3.79813e-05	0	0	0	1.93824e-05	1.31993e-05	0	0	0	0	0	0	0	Bacteria; Proteobacteria; Gammaproteobacteria; Pseudomonadales; Pseudomonadaceae; Pseudomonas
New,CleanUp,ReferenceOTU498190	1.32369e-05	5.22243e-05	0	4.90619e-06	0	0	0	0	0	0	0	0	0	0	Bacteria; Chloroflexi; SAR202 clade; uncultured bacterium; uncultured bacterium; uncultured bacterium; uncultured bacterium
New,CleanUp,ReferenceOTU228140	2.94153e-06	5.53894e-05	4.4551e-06	7.35928e-06	0	0	0	0	0	0	0	0	0	0	Bacteria; Spirochaetae; Spirochaetes; Spirochaetales; Spirochaetaceae; Spirochaeta
New,CleanUp,ReferenceOTU484010	2.20615e-05	3.16511e-05	8.9102e-06	7.35928e-06	0	0	0	0	0	0	0	0	0	0	Bacteria; Chloroflexi; SAR202 clade; uncultured Chloroflexus sp,; uncultured Chloroflexus sp,; uncultured Chloroflexus sp,; uncultured Chloroflexus sp,
New,CleanUp,ReferenceOTU973544	1.61784e-05	1.10779e-05	1.55929e-05	2.6984e-05	0	0	0	0	0	0	0	0	0	0	Bacteria; Planctomycetes; Pla3 lineage; uncultured planctomycete; uncultured planctomycete; uncultured planctomycete; uncultured planctomycete
New,CleanUp,ReferenceOTU157648	2.20615e-05	1.58255e-06	4.23235e-05	3.67964e-06	0	0	0	0	0	0	0	0	0	0	Unassigned
EF575213,1,1463	1.61784e-05	2.53209e-05	1.11378e-05	1.59451e-05	0	1.02013e-06	0	0	0	0	0	0	0	0	Bacteria; Planctomycetes; Phycisphaerae; Phycisphaerales; Phycisphaeraceae; FS140-16B-02 marine group; uncultured bacterium
JW174337,1,1377	1.47077e-06	3.16511e-05	0	1.22655e-06	0	6.12077e-06	2.90384e-05	0	0	0	0	0	0	0	Bacteria; Proteobacteria; Gammaproteobacteria; Alteromonadales; Moritellaceae; Moritella
New,CleanUp,ReferenceOTU893213	1.47077e-06	5.38068e-05	5.56888e-06	8.58583e-06	0	0	0	0	0	0	0	0	0	0	Bacteria; Planctomycetes; Planctomycetacia; Planctomycetales; Planctomycetaceae; Rhodopirellula; uncultured bacterium
New,CleanUp,ReferenceOTU7703	1.47077e-06	0	0	0	0	2.04026e-05	4.75174e-05	0	0	0	0	0	0	0	Bacteria; Proteobacteria; Gammaproteobacteria; Oceanospirillales; SUP05 cluster; uncultured gamma proteobacterium; uncultured gamma proteobacterium
New,CleanUp,ReferenceOTU178447	1.17661e-05	1.10779e-05	1.55929e-05	2.20778e-05	8.67787e-06	0	0	0	0	0	0	0	0	0	Bacteria; Proteobacteria; Gammaproteobacteria; Thiotrichales; Francisellaceae; Francisella
JX016468,1,1482	3.52984e-05	9.49532e-06	1.44791e-05	9.81238e-06	0	0	0	0	0	0	0	0	0	0	Bacteria; Bacteroidetes; Flavobacteriia; Flavobacteriales; Cryomorphaceae
New,CleanUp,ReferenceOTU198985	1.47077e-05	3.63987e-05	4.4551e-06	1.3492e-05	0	0	0	0	0	0	0	0	0	0	Bacteria; Proteobacteria; Gammaproteobacteria; Alteromonadales; Shewanellaceae; Shewanella
New,ReferenceOTU456	1.17661e-05	2.53209e-05	2.45031e-05	7.35928e-06	0	0	0	0	0	0	0	0	0	0	Unassigned
HQ674248,1,1463	2.35322e-05	2.05732e-05	1.0024e-05	1.3492e-05	0	0	1.31993e-06	0	0	0	0	0	0	0	Bacteria; Proteobacteria; Alphaproteobacteria; Rhodospirillales; Rhodospirillaceae; Defluviicoccus; uncultured bacterium
HM069038,1,1368	0	6.64673e-05	0	2.45309e-06	0	0	0	0	0	0	0	0	0	0	Bacteria; Proteobacteria; Betaproteobacteria; Burkholderiales; Oxalobacteraceae; Massilia; uncultured bacterium
New,CleanUp,ReferenceOTU994015	2.05907e-05	4.74766e-06	4.23235e-05	1.22655e-06	0	0	0	0	0	0	0	0	0	0	Bacteria; Deferribacteres; Deferribacteres; Deferribacterales; SAR406 clade(Marine group A); uncultured bacterium; uncultured bacterium
JX227020,1,1442	1.61784e-05	1.74081e-05	2.67306e-05	0	0	7.1409e-06	1.31993e-06	0	0	0	0	0	0	0	Bacteria; Chloroflexi; SAR202 clade; uncultured bacterium; uncultured bacterium; uncultured bacterium; uncultured bacterium
New,CleanUp,ReferenceOTU533185	2.94153e-05	1.74081e-05	1.44791e-05	7.35928e-06	0	0	0	0	0	0	0	0	0	0	Bacteria; Proteobacteria; Alphaproteobacteria; Sneathiellales; Sneathiellaceae; Sneathiella; uncultured alpha proteobacterium
HQ242629,1,1447	2.05907e-05	2.21558e-05	0	2.45309e-05	0	0	1.31993e-06	0	0	0	0	0	0	0	Bacteria; Proteobacteria; Alphaproteobacteria; SAR11 clade; Surface 1
New,CleanUp,ReferenceOTU982583	0	4.43115e-05	1.55929e-05	8.58583e-06	0	0	0	0	0	0	0	0	0	0	Bacteria; Lentisphaerae; LD1-PA34; uncultured bacterium; uncultured bacterium; uncultured bacterium; uncultured bacterium
New,CleanUp,ReferenceOTU523811	1.17661e-05	2.05732e-05	3.11857e-05	4.90619e-06	0	0	0	0	0	0	0	0	0	0	Bacteria; Proteobacteria; Gammaproteobacteria; Oceanospirillales; Alcanivoracaceae; Alcanivorax; uncultured bacterium
AY727011,1,1250	1.61784e-05	1.58255e-06	1.11378e-05	2.82106e-05	0	1.12214e-05	0	0	0	0	0	0	0	0	Bacteria; Proteobacteria; Gammaproteobacteria; Alteromonadales; Alteromonadaceae; Alteromonas
New,CleanUp,ReferenceOTU31862	1.17661e-05	1.58255e-05	3.4527e-05	6.13273e-06	0	0	0	0	0	0	0	0	0	0	Bacteria; Acidobacteria; Acidobacteria; Subgroup 6; uncultured bacterium; uncultured bacterium; uncultured bacterium
New,CleanUp,ReferenceOTU276688	1.02954e-05	2.37383e-05	1.33653e-05	2.08513e-05	0	0	0	0	0	0	0	0	0	0	Bacteria; Proteobacteria; Gammaproteobacteria; E01-9C-26 marine group
DQ396316,1,1478	0	2.53209e-05	1.11378e-06	4.0476e-05	0	0	1.31993e-06	0	0	0	0	0	0	0	Bacteria; Proteobacteria; AEGEAN-245; uncultured bacterium; uncultured bacterium; uncultured bacterium; uncultured bacterium
FJ746307,1,1437	3.23568e-05	1.58255e-05	2.0048e-05	0	0	0	0	0	0	0	0	0	0	0	Bacteria; Proteobacteria; Alphaproteobacteria; Rhodospirillales; Rhodospirillaceae; Defluviicoccus; uncultured bacterium
New,CleanUp,ReferenceOTU723701	5.88306e-06	4.43115e-05	6.68265e-06	1.10389e-05	0	0	0	0	0	0	0	0	0	0	Bacteria; Proteobacteria; Alphaproteobacteria; Rickettsiales; Rickettsiaceae; uncultured; uncultured bacterium
New,ReferenceOTU606	8.82459e-06	0	5.90301e-05	0	0	0	0	0	0	0	0	0	0	0	Bacteria; Proteobacteria; Gammaproteobacteria; Alteromonadales; Idiomarinaceae; Idiomarina
AB183491,1,1509	0	1.10779e-05	7.79643e-06	0	0	9.18115e-06	3.95978e-05	0	0	0	0	0	0	0	Bacteria; Proteobacteria; Gammaproteobacteria; Alteromonadales; Moritellaceae; Moritella
HQ163584,1,1393	2.5003e-05	9.49532e-06	1.33653e-05	1.96248e-05	0	0	0	0	0	0	0	0	0	0	Bacteria; Deferribacteres; Deferribacteres; Deferribacterales; SAR406 clade(Marine group A); uncultured bacterium; uncultured bacterium
New,CleanUp,ReferenceOTU160728	2.20615e-05	2.69034e-05	1.11378e-05	7.35928e-06	0	0	0	0	0	0	0	0	0	0	Bacteria; Deferribacteres; Deferribacteres; Deferribacterales; PAUC34f; uncultured bacterium; uncultured bacterium
GU567970,11037,12406	1.02954e-05	3.48162e-05	1.0024e-05	1.22655e-05	0	0	0	0	0	0	0	0	0	0	Bacteria; Proteobacteria; Alphaproteobacteria; Rhodospirillales; Rhodospirillaceae; uncultured; uncultured bacterium
New,CleanUp,ReferenceOTU666680	4.4123e-05	1.26604e-05	5.56888e-06	3.67964e-06	0	0	1.31993e-06	0	0	0	0	0	0	0	Bacteria; Proteobacteria; Gammaproteobacteria
New,CleanUp,ReferenceOTU615555	0	4.43115e-05	4.4551e-06	1.59451e-05	0	0	2.63985e-06	0	0	0	0	0	0	0	Bacteria; Chloroflexi; SAR202 clade
New,CleanUp,ReferenceOTU975221	3.23568e-05	6.33022e-06	1.78204e-05	9.81238e-06	0	1.02013e-06	0	0	0	0	0	0	0	0	Bacteria; Proteobacteria; Alphaproteobacteria; SAR11 clade; Deep 1; uncultured bacterium; uncultured bacterium
AJ567599,1,1467	5.29476e-05	0	1.33653e-05	0	0	1.02013e-06	0	0	0	0	0	0	0	0	Bacteria; BD1-5; uncultured bacterium; uncultured bacterium; uncultured bacterium; uncultured bacterium; uncultured bacterium
KC522849,1,1342	2.64738e-05	1.58255e-05	5.56888e-06	1.83982e-05	0	1.02013e-06	0	0	0	0	0	0	0	0	Bacteria; Deferribacteres; Deferribacteres; Deferribacterales; SAR406 clade(Marine group A); uncultured bacterium; uncultured bacterium
New,CleanUp,ReferenceOTU1020047	3.38276e-05	1.4243e-05	1.67066e-05	2.45309e-06	0	0	0	0	0	0	0	0	0	0	Bacteria; Proteobacteria; Deltaproteobacteria; Bdellovibrionales; Bdellovibrionaceae; OM27 clade; uncultured bacterium
New,CleanUp,ReferenceOTU679141	2.94153e-06	1.58255e-06	1.89342e-05	4.90619e-06	0	3.06038e-06	3.5638e-05	0	0	0	0	0	0	0	Bacteria; Proteobacteria; Gammaproteobacteria; Oceanospirillales; Alcanivoracaceae; Alcanivorax
FR684796,1,1442	2.05907e-05	2.37383e-05	6.68265e-06	1.59451e-05	0	0	0	0	0	0	0	0	0	0	Bacteria; Proteobacteria; Alphaproteobacteria; SAR11 clade; Surface 1
New,CleanUp,ReferenceOTU324807	1.02954e-05	4.74766e-06	4.4551e-05	7.35928e-06	0	0	0	0	0	0	0	0	0	0	Bacteria; Proteobacteria; Gammaproteobacteria; E01-9C-26 marine group
New,ReferenceOTU1556	2.05907e-05	2.05732e-05	1.22515e-05	1.3492e-05	0	0	0	0	0	0	0	0	0	0	Bacteria; Acidobacteria; Acidobacteria; Subgroup 6; uncultured bacterium; uncultured bacterium; uncultured bacterium
New,CleanUp,ReferenceOTU920027	4.70645e-05	9.49532e-06	7.79643e-06	1.22655e-06	0	0	1.31993e-06	0	0	0	0	0	0	0	Bacteria; Proteobacteria; Deltaproteobacteria; Bdellovibrionales; Bdellovibrionaceae; OM27 clade; uncultured bacterium
DQ156382,1,1259	1.76492e-05	4.43115e-05	0	4.90619e-06	0	0	0	0	0	0	0	0	0	0	Archaea; Euryarchaeota; Thermoplasmata; Thermoplasmatales; Marine Group II
EF572198,1,1478	7.35383e-06	2.8486e-05	8.9102e-06	2.20778e-05	0	0	0	0	0	0	0	0	0	0	Bacteria; Bacteroidetes; Flavobacteriia; Flavobacteriales; NS9 marine group; uncultured bacterium; uncultured bacterium
New,CleanUp,ReferenceOTU240687	1.912e-05	3.16511e-05	0	1.59451e-05	0	0	0	0	0	0	0	0	0	0	Bacteria; Proteobacteria; Gammaproteobacteria; Methylococcales; Methylococcaceae; Methylocaldum; uncultured bacterium
New,CleanUp,ReferenceOTU76118	7.35383e-06	5.22243e-05	3.34133e-06	3.67964e-06	0	0	0	0	0	0	0	0	0	0	Bacteria; Planctomycetes; Pla3 lineage; uncultured bacterium; uncultured bacterium; uncultured bacterium; uncultured bacterium
New,CleanUp,ReferenceOTU537337	0	2.8486e-05	0	3.8023e-05	0	0	0	0	0	0	0	0	0	0	Unassigned
New,CleanUp,ReferenceOTU477994	1.912e-05	4.74766e-06	4.00959e-05	2.45309e-06	0	0	0	0	0	0	0	0	0	0	Unassigned
New,CleanUp,ReferenceOTU663548	2.20615e-05	2.05732e-05	2.11617e-05	2.45309e-06	0	0	0	0	0	0	0	0	0	0	Unassigned
EU491069,1,1512	4.4123e-06	3.79813e-05	6.68265e-06	1.71717e-05	0	0	0	0	0	0	0	0	0	0	Bacteria; Candidate division BRC1; uncultured bacterium; uncultured bacterium; uncultured bacterium; uncultured bacterium; uncultured bacterium
New,CleanUp,ReferenceOTU223595	1.912e-05	0	7.79643e-06	1.22655e-06	0	2.75435e-05	1.05594e-05	0	0	0	0	0	0	0	Bacteria; Proteobacteria; Epsilonproteobacteria; Campylobacterales; Helicobacteraceae; Sulfurimonas; uncultured bacterium
New,CleanUp,ReferenceOTU543155	0	3.79813e-05	0	2.82106e-05	0	0	0	0	0	0	0	0	0	0	Bacteria; Verrucomicrobia; Opitutae; RS-B22; uncultured bacterium; uncultured bacterium; uncultured bacterium
New,CleanUp,ReferenceOTU110241	5.58891e-05	7.91277e-06	1.11378e-06	1.22655e-06	0	0	0	0	0	0	0	0	0	0	Bacteria; Bacteroidetes; Flavobacteriia; Flavobacteriales; Flavobacteriaceae; Zunongwangia
New,CleanUp,ReferenceOTU194342	1.912e-05	2.69034e-05	2.0048e-05	0	0	0	0	0	0	0	0	0	0	0	Unassigned
New,CleanUp,ReferenceOTU856253	1.912e-05	2.53209e-05	5.56888e-06	1.47186e-05	0	0	1.31993e-06	0	0	0	0	0	0	0	Archaea; Thaumarchaeota; Marine Group I; uncultured marine group I thaumarchaeote; uncultured marine group I thaumarchaeote; uncultured marine group I thaumarchaeote; uncultured marine group I thaumarchaeote
New,CleanUp,ReferenceOTU567085	2.94153e-06	3.48162e-05	0	2.82106e-05	0	0	0	0	0	0	0	0	0	0	Bacteria; Chloroflexi; SAR202 clade
New,CleanUp,ReferenceOTU245537	1.76492e-05	1.10779e-05	3.22995e-05	4.90619e-06	0	0	0	0	0	0	0	0	0	0	Bacteria; Deferribacteres; Deferribacteres; Deferribacterales; SAR406 clade(Marine group A); uncultured bacterium; uncultured bacterium
New,CleanUp,ReferenceOTU231063	2.35322e-05	2.21558e-05	2.0048e-05	0	0	0	0	0	0	0	0	0	0	0	Bacteria; Proteobacteria; Alphaproteobacteria; Sphingomonadales; Erythrobacteraceae; uncultured; uncultured organism
JQ678376,1,1527	8.82459e-06	4.2729e-05	3.34133e-06	9.81238e-06	0	1.02013e-06	0	0	0	0	0	0	0	0	Bacteria; Proteobacteria; Deltaproteobacteria; Desulfuromonadales; GR-WP33-58; uncultured bacterium; uncultured bacterium
KF859675,1,1501	1.47077e-05	1.89906e-05	2.11617e-05	9.81238e-06	0	1.02013e-06	0	0	0	0	0	0	0	0	Bacteria; Proteobacteria; Gammaproteobacteria; Oceanospirillales; Halomonadaceae; Halomonas
New,CleanUp,ReferenceOTU572510	3.82399e-05	1.26604e-05	5.56888e-06	6.13273e-06	0	3.06038e-06	0	0	0	0	0	0	0	0	Unassigned
New,CleanUp,ReferenceOTU386776	7.35383e-06	3.00685e-05	1.22515e-05	1.59451e-05	0	0	0	0	0	0	0	0	0	0	Unassigned
HQ673536,1,1466	1.02954e-05	1.89906e-05	1.67066e-05	1.96248e-05	0	0	0	0	0	0	0	0	0	0	Bacteria; Proteobacteria; Deltaproteobacteria; SAR324 clade(Marine group B); uncultured bacterium; uncultured bacterium; uncultured bacterium
New,CleanUp,ReferenceOTU571150	1.02954e-05	4.74766e-05	7.79643e-06	0	0	0	0	0	0	0	0	0	0	0	Bacteria; Proteobacteria; Gammaproteobacteria; Oceanospirillales; Halomonadaceae; Halomonas
FR685716,1,1498	1.17661e-05	2.69034e-05	1.11378e-06	2.57575e-05	0	0	0	0	0	0	0	0	0	0	Bacteria; Proteobacteria; Gammaproteobacteria; Oceanospirillales; SAR86 clade; uncultured bacterium; uncultured bacterium
EF573580,1,1524	0	4.58941e-05	0	1.96248e-05	0	0	0	0	0	0	0	0	0	0	Bacteria; Deferribacteres; Deferribacteres; Deferribacterales; SAR406 clade(Marine group A); uncultured bacterium; uncultured bacterium
New,CleanUp,ReferenceOTU609865	7.35383e-06	2.21558e-05	7.79643e-06	2.82106e-05	0	0	0	0	0	0	0	0	0	0	Unassigned
New,CleanUp,ReferenceOTU114096	0	3.48162e-05	0	3.06637e-05	0	0	0	0	0	0	0	0	0	0	Bacteria; Chloroflexi; SAR202 clade; uncultured Chloroflexi bacterium; uncultured Chloroflexi bacterium; uncultured Chloroflexi bacterium; uncultured Chloroflexi bacterium
HQ673421,1,1473	1.17661e-05	3.00685e-05	8.9102e-06	1.47186e-05	0	0	0	0	0	0	0	0	0	0	Bacteria; Proteobacteria; Alphaproteobacteria; Rhodospirillales; Rhodospirillaceae; uncultured; uncultured bacterium
KC331260,1,1515	1.47077e-06	4.58941e-05	1.11378e-06	1.59451e-05	0	1.02013e-06	0	0	0	0	0	0	0	0	Bacteria; Acidobacteria; Acidobacteria; Subgroup 6; uncultured bacterium; uncultured bacterium; uncultured bacterium
KF859656,1,1488	1.47077e-05	1.89906e-05	1.11378e-05	1.71717e-05	0	2.04026e-06	1.31993e-06	0	0	0	0	0	0	0	Bacteria; Proteobacteria; Gammaproteobacteria; Oceanospirillales; Halomonadaceae; Halomonas
New,CleanUp,ReferenceOTU480220	0	2.37383e-05	2.22755e-06	3.92495e-05	0	0	0	0	0	0	0	0	0	0	Bacteria; Proteobacteria; Gammaproteobacteria; NKB5
New,CleanUp,ReferenceOTU1001110	0	4.90592e-05	0	1.59451e-05	0	0	0	0	0	0	0	0	0	0	Bacteria; Acidobacteria; Acidobacteria; Subgroup 21; uncultured bacterium; uncultured bacterium; uncultured bacterium
New,CleanUp,ReferenceOTU55456	7.35383e-06	3.79813e-05	0	1.96248e-05	0	0	0	0	0	0	0	0	0	0	Bacteria; Proteobacteria; Deltaproteobacteria; GR-WP33-30; uncultured bacterium; uncultured bacterium; uncultured bacterium
HQ674247,1,1492	1.76492e-05	3.63987e-05	2.22755e-06	8.58583e-06	0	0	0	0	0	0	0	0	0	0	Bacteria; Bacteroidetes; Flavobacteriia; Flavobacteriales; NS7 marine group; uncultured bacterium; uncultured bacterium
New,CleanUp,ReferenceOTU891948	1.32369e-05	3.00685e-05	5.56888e-06	1.59451e-05	0	0	0	0	0	0	0	0	0	0	Bacteria; Proteobacteria; Gammaproteobacteria; Thiotrichales; 1G93; uncultured bacterium; uncultured bacterium
JX193417,1,1526	0	5.85545e-05	0	4.90619e-06	0	0	1.31993e-06	0	0	0	0	0	0	0	Bacteria; Planctomycetes; Planctomycetacia; Planctomycetales; Planctomycetaceae; Rhodopirellula; uncultured bacterium
New,CleanUp,ReferenceOTU286729	1.02954e-05	1.26604e-05	1.11378e-05	3.06637e-05	0	0	0	0	0	0	0	0	0	0	Unassigned
GQ347072,1,1276	4.11814e-05	0	1.0024e-05	4.90619e-06	0	2.04026e-06	6.59963e-06	0	0	0	0	0	0	0	Bacteria; Proteobacteria; Gammaproteobacteria; Oceanospirillales; SUP05 cluster
JX529067,1,1376	1.02954e-05	3.32336e-05	5.56888e-06	1.3492e-05	0	2.04026e-06	0	0	0	0	0	0	0	0	Bacteria; Proteobacteria; Alphaproteobacteria; SAR11 clade; Deep 1; uncultured bacterium; uncultured bacterium
AB524074,1,1447	4.4123e-06	7.91277e-06	4.90061e-05	1.22655e-06	0	2.04026e-06	0	0	0	0	0	0	0	0	Bacteria; Proteobacteria; Alphaproteobacteria; Sphingomonadales; Erythrobacteraceae; Altererythrobacter; uncultured bacterium
New,CleanUp,ReferenceOTU79457	2.64738e-05	6.33022e-06	2.56168e-05	6.13273e-06	0	0	0	0	0	0	0	0	0	0	Bacteria; Proteobacteria; Gammaproteobacteria; Legionellales; Coxiellaceae; Coxiella; uncultured gamma proteobacterium
DQ396353,1,1546	8.82459e-06	2.8486e-05	1.0024e-05	1.71717e-05	0	0	0	0	0	0	0	0	0	0	Bacteria; Acidobacteria; Acidobacteria; Subgroup 6
HQ673549,1,1510	2.35322e-05	4.74766e-06	1.78204e-05	1.83982e-05	0	0	0	0	0	0	0	0	0	0	Bacteria; Deferribacteres; Deferribacteres; Deferribacterales; SAR406 clade(Marine group A); uncultured bacterium; uncultured bacterium
New,CleanUp,ReferenceOTU83375	2.20615e-05	1.4243e-05	8.9102e-06	1.71717e-05	0	2.04026e-06	0	0	0	0	0	0	0	0	Bacteria; Proteobacteria; Betaproteobacteria; Methylophilales; Methylophilaceae; OM43 clade
EU478630,1,2261	3.23568e-05	1.10779e-05	1.11378e-05	9.81238e-06	0	0	0	0	0	0	0	0	0	0	Bacteria; Planctomycetes; 028H05-P-BN-P5
JN018803,1,1343	4.4123e-06	3.48162e-05	0	2.20778e-05	0	3.06038e-06	0	0	0	0	0	0	0	0	Bacteria; Proteobacteria; Alphaproteobacteria; Rhodospirillales; Rhodospirillaceae; AEGEAN-169 marine group; uncultured bacterium
HM798970,1,1476	3.08861e-05	3.16511e-06	2.78444e-05	2.45309e-06	0	0	0	0	0	0	0	0	0	0	Bacteria; Proteobacteria; Deltaproteobacteria; Desulfuromonadales; GR-WP33-58; uncultured delta proteobacterium; uncultured delta proteobacterium
New,CleanUp,ReferenceOTU1056970	0	2.69034e-05	6.68265e-06	3.06637e-05	0	0	0	0	0	0	0	0	0	0	Bacteria; Acidobacteria; Acidobacteria; Subgroup 6
New,ReferenceOTU1029	2.05907e-05	1.10779e-05	2.78444e-05	3.67964e-06	0	1.02013e-06	0	0	0	0	0	0	0	0	Bacteria; Proteobacteria; Deltaproteobacteria; SAR324 clade(Marine group B); uncultured bacterium; uncultured bacterium; uncultured bacterium
New,CleanUp,ReferenceOTU433038	8.82459e-06	2.8486e-05	1.33653e-05	1.3492e-05	0	0	0	0	0	0	0	0	0	0	Bacteria; Proteobacteria; Deltaproteobacteria; Desulfobacterales; Nitrospinaceae; uncultured; uncultured bacterium
New,ReferenceOTU743	7.35383e-06	3.63987e-05	1.67066e-05	3.67964e-06	0	0	0	0	0	0	0	0	0	0	Bacteria; Proteobacteria; Gammaproteobacteria; Vibrionales; Vibrionaceae; uncultured; uncultured bacterium
New,CleanUp,ReferenceOTU624396	1.17661e-05	2.21558e-05	4.4551e-06	2.57575e-05	0	0	0	0	0	0	0	0	0	0	Bacteria; Proteobacteria; Deltaproteobacteria; Myxococcales; 0319-6G20; uncultured bacterium; uncultured bacterium
New,CleanUp,ReferenceOTU376840	2.94153e-05	1.58255e-06	1.22515e-05	0	0	1.02013e-06	1.97989e-05	0	0	0	0	0	0	0	Bacteria; Proteobacteria; Gammaproteobacteria; Oceanospirillales; SUP05 cluster
New,CleanUp,ReferenceOTU25431	2.94153e-06	3.16511e-05	1.0024e-05	1.83982e-05	0	1.02013e-06	0	0	0	0	0	0	0	0	Bacteria; Verrucomicrobia; Arctic97B-4 marine group; uncultured bacterium; uncultured bacterium; uncultured bacterium; uncultured bacterium
New,CleanUp,ReferenceOTU8379	1.02954e-05	3.32336e-05	1.55929e-05	4.90619e-06	0	0	0	0	0	0	0	0	0	0	Bacteria; Deferribacteres; Deferribacteres; Deferribacterales; PAUC34f; uncultured bacterium; uncultured bacterium
New,CleanUp,ReferenceOTU51390	2.79445e-05	1.26604e-05	2.11617e-05	1.22655e-06	0	1.02013e-06	0	0	0	0	0	0	0	0	Bacteria; Chloroflexi; SAR202 clade; uncultured bacterium; uncultured bacterium; uncultured bacterium; uncultured bacterium
New,CleanUp,ReferenceOTU557395	1.76492e-05	1.4243e-05	2.22755e-05	9.81238e-06	0	0	0	0	0	0	0	0	0	0	Bacteria; Chloroflexi; S085; uncultured bacterium; uncultured bacterium; uncultured bacterium; uncultured bacterium
New,CleanUp,ReferenceOTU115054	2.20615e-05	2.37383e-05	2.22755e-06	1.59451e-05	0	0	0	0	0	0	0	0	0	0	Bacteria; Chloroflexi; SAR202 clade
HE817804,1,1430	1.61784e-05	1.26604e-05	1.67066e-05	1.83982e-05	0	0	0	0	0	0	0	0	0	0	Bacteria; Chloroflexi; SAR202 clade; uncultured bacterium; uncultured bacterium; uncultured bacterium; uncultured bacterium
New,CleanUp,ReferenceOTU1076989	1.47077e-05	1.4243e-05	1.78204e-05	1.71717e-05	0	0	0	0	0	0	0	0	0	0	Bacteria; Proteobacteria; Deltaproteobacteria; Desulfuromonadales; GR-WP33-58; uncultured bacterium; uncultured bacterium
New,CleanUp,ReferenceOTU393940	2.5003e-05	1.58255e-05	1.44791e-05	8.58583e-06	0	0	0	0	0	0	0	0	0	0	Bacteria; Proteobacteria; Gammaproteobacteria; Oceanospirillales; JL-ETNP-Y6
New,CleanUp,ReferenceOTU441877	1.02954e-05	3.16511e-05	2.22755e-06	1.83982e-05	0	0	1.31993e-06	0	0	0	0	0	0	0	Bacteria; Chloroflexi; SAR202 clade
New,ReferenceOTU1799	2.94153e-06	0	0	0	0	0	6.07166e-05	0	0	0	0	0	0	0	Bacteria; Proteobacteria; Gammaproteobacteria; Thiotrichales; Piscirickettsiaceae; endosymbionts; uncultured proteobacterium
New,CleanUp,ReferenceOTU648386	0	1.10779e-05	2.22755e-06	5.02884e-05	0	0	0	0	0	0	0	0	0	0	Bacteria; Chloroflexi; SAR202 clade; uncultured bacterium; uncultured bacterium; uncultured bacterium; uncultured bacterium
HM799112,1,1481	1.61784e-05	2.53209e-05	1.22515e-05	9.81238e-06	0	0	0	0	0	0	0	0	0	0	Bacteria; Proteobacteria; Deltaproteobacteria; GR-WP33-30; uncultured bacterium; uncultured bacterium; uncultured bacterium
JN874322,1,1489	2.64738e-05	3.48162e-05	2.22755e-06	0	0	0	0	0	0	0	0	0	0	0	Bacteria; Proteobacteria; Gammaproteobacteria; Vibrionales; Vibrionaceae; uncultured; uncultured bacterium
New,CleanUp,ReferenceOTU1075081	3.67691e-05	7.91277e-06	8.9102e-06	9.81238e-06	0	0	0	0	0	0	0	0	0	0	Bacteria; Deferribacteres; Deferribacteres; Deferribacterales; SAR406 clade(Marine group A); uncultured bacterium; uncultured bacterium
New,CleanUp,ReferenceOTU677614	1.02954e-05	1.89906e-05	1.44791e-05	1.96248e-05	0	0	0	0	0	0	0	0	0	0	Bacteria; Cyanobacteria; ML635J-21; uncultured bacterium; uncultured bacterium; uncultured bacterium; uncultured bacterium
New,ReferenceOTU2583	1.76492e-05	2.37383e-05	1.44791e-05	7.35928e-06	0	0	0	0	0	0	0	0	0	0	Bacteria; Proteobacteria; Alphaproteobacteria; Rhodospirillales; Rhodospirillaceae; uncultured; uncultured bacterium
New,CleanUp,ReferenceOTU77720	0	4.11464e-05	0	2.20778e-05	0	0	0	0	0	0	0	0	0	0	Bacteria; NPL-UPA2
HF912744,1,1479	2.94153e-06	4.11464e-05	4.4551e-06	1.3492e-05	0	1.02013e-06	0	0	0	0	0	0	0	0	Bacteria; Acidobacteria; Acidobacteria; Subgroup 21; uncultured Acidobacterium sp,; uncultured Acidobacterium sp,; uncultured Acidobacterium sp,
HQ721393,1,1411	2.35322e-05	1.74081e-05	1.33653e-05	8.58583e-06	0	0	0	0	0	0	0	0	0	0	Bacteria; Deferribacteres; Deferribacteres; Deferribacterales; PAUC34f; uncultured bacterium; uncultured bacterium
New,CleanUp,ReferenceOTU369827	1.17661e-05	1.58255e-05	1.67066e-05	1.3492e-05	0	5.10064e-06	0	0	0	0	0	0	0	0	Bacteria; Proteobacteria; Alphaproteobacteria; Rhodospirillales; Rhodospirillaceae; uncultured; uncultured bacterium
EU802763,1,1451	2.35322e-05	1.4243e-05	3.34133e-06	1.96248e-05	0	2.04026e-06	0	0	0	0	0	0	0	0	Bacteria; Cyanobacteria; Cyanobacteria; SubsectionI; FamilyI; Prochlorococcus; uncultured bacterium
New,CleanUp,ReferenceOTU77343	1.02954e-05	0	5.12337e-05	1.22655e-06	0	0	0	0	0	0	0	0	0	0	Bacteria; Proteobacteria; Gammaproteobacteria; Alteromonadales; Idiomarinaceae; Idiomarina
New,CleanUp,ReferenceOTU771385	2.05907e-05	1.89906e-05	1.44791e-05	7.35928e-06	0	0	1.31993e-06	0	0	0	0	0	0	0	Bacteria; Chloroflexi; SAR202 clade; uncultured bacterium; uncultured bacterium; uncultured bacterium; uncultured bacterium
EU589259,1,1399	1.47077e-06	6.0137e-05	1.11378e-06	0	0	0	0	0	0	0	0	0	0	0	Bacteria; Proteobacteria; Alphaproteobacteria; Rhodobacterales; Rhodobacteraceae; Paracoccus; uncultured bacterium
GU145457,1,1468	7.35383e-06	2.21558e-05	1.33653e-05	1.96248e-05	0	0	0	0	0	0	0	0	0	0	Bacteria; Proteobacteria; Deltaproteobacteria; Bdellovibrionales; Bdellovibrionaceae; OM27 clade; uncultured bacterium
JQ220971,1,914	3.08861e-05	1.10779e-05	1.55929e-05	4.90619e-06	0	0	0	0	0	0	0	0	0	0	Archaea; Euryarchaeota; Thermoplasmata; Thermoplasmatales; Marine Group II; uncultured marine archaeon; uncultured marine archaeon
New,CleanUp,ReferenceOTU143544	2.35322e-05	1.74081e-05	5.56888e-06	1.59451e-05	0	0	0	0	0	0	0	0	0	0	Bacteria; Cyanobacteria; ML635J-21; uncultured organism; uncultured organism; uncultured organism; uncultured organism
New,CleanUp,ReferenceOTU7784	2.05907e-05	2.37383e-05	1.55929e-05	2.45309e-06	0	0	0	0	0	0	0	0	0	0	Bacteria; Proteobacteria; Gammaproteobacteria; Oceanospirillales; Halomonadaceae; Halomonas
New,CleanUp,ReferenceOTU1002467	0	3.63987e-05	2.22755e-05	3.67964e-06	0	0	0	0	0	0	0	0	0	0	Bacteria; Chloroflexi; S085; uncultured bacterium; uncultured bacterium; uncultured bacterium; uncultured bacterium
New,CleanUp,ReferenceOTU602451	1.32369e-05	4.43115e-05	1.11378e-06	3.67964e-06	0	0	0	0	0	0	0	0	0	0	Bacteria; Chloroflexi; SAR202 clade; uncultured bacterium; uncultured bacterium; uncultured bacterium; uncultured bacterium
New,CleanUp,ReferenceOTU117115	7.35383e-06	3.32336e-05	3.34133e-06	1.83982e-05	0	0	0	0	0	0	0	0	0	0	Unassigned
New,CleanUp,ReferenceOTU362249	0	2.05732e-05	0	4.17026e-05	0	0	0	0	0	0	0	0	0	0	Bacteria; Proteobacteria; Deltaproteobacteria; Bdellovibrionales; Bdellovibrionaceae; OM27 clade; uncultured delta proteobacterium
HQ652529,1,1378	3.38276e-05	1.58255e-06	2.0048e-05	3.67964e-06	0	3.06038e-06	0	0	0	0	0	0	0	0	Bacteria; Proteobacteria; Deltaproteobacteria; Bdellovibrionales; Bdellovibrionaceae; OM27 clade; uncultured bacterium
New,CleanUp,ReferenceOTU951159	0	5.22243e-05	0	9.81238e-06	0	0	0	0	0	0	0	0	0	0	Bacteria; Chloroflexi; SAR202 clade
New,CleanUp,ReferenceOTU919379	3.08861e-05	1.58255e-06	2.45031e-05	4.90619e-06	0	0	0	0	0	0	0	0	0	0	Bacteria; Proteobacteria; Gammaproteobacteria; Alteromonadales; Idiomarinaceae; Idiomarina
HQ674186,1,1519	2.05907e-05	2.05732e-05	1.44791e-05	6.13273e-06	0	0	0	0	0	0	0	0	0	0	Bacteria; Proteobacteria; Gammaproteobacteria; Salinisphaerales; Salinisphaeraceae; ZD0417 marine group
HQ673237,1,1510	1.02954e-05	2.69034e-05	1.22515e-05	1.22655e-05	0	0	0	0	0	0	0	0	0	0	Bacteria; Deferribacteres; Deferribacteres; Deferribacterales; SAR406 clade(Marine group A); uncultured bacterium; uncultured bacterium
New,CleanUp,ReferenceOTU958166	2.20615e-05	4.74766e-06	1.89342e-05	1.59451e-05	0	0	0	0	0	0	0	0	0	0	Bacteria; Chloroflexi; SAR202 clade
New,CleanUp,ReferenceOTU11730	2.20615e-05	1.58255e-05	2.11617e-05	2.45309e-06	0	0	0	0	0	0	0	0	0	0	Bacteria; Chloroflexi; SAR202 clade; uncultured deep-sea bacterium; uncultured deep-sea bacterium; uncultured deep-sea bacterium; uncultured deep-sea bacterium
EU478627,1,2337	2.94153e-06	1.26604e-05	4.34372e-05	2.45309e-06	0	0	0	0	0	0	0	0	0	0	Bacteria; Planctomycetes; OM190; uncultured planctomycete; uncultured planctomycete; uncultured planctomycete; uncultured planctomycete
New,CleanUp,ReferenceOTU270388	3.38276e-05	1.58255e-06	7.79643e-06	1.59451e-05	0	1.02013e-06	1.31993e-06	0	0	0	0	0	0	0	Bacteria; Proteobacteria; Gammaproteobacteria; Oceanospirillales; SUP05 cluster
HQ674485,1,1499	3.08861e-05	1.26604e-05	1.67066e-05	1.22655e-06	0	0	0	0	0	0	0	0	0	0	Bacteria; Verrucomicrobia; Opitutae; MB11C04 marine group; uncultured bacterium; uncultured bacterium; uncultured bacterium
New,CleanUp,ReferenceOTU199199	1.47077e-05	2.53209e-05	6.68265e-06	1.47186e-05	0	0	0	0	0	0	0	0	0	0	Bacteria; Deferribacteres; Deferribacteres; Deferribacterales; PAUC34f; uncultured bacterium; uncultured bacterium
New,CleanUp,ReferenceOTU330389	4.4123e-06	0	0	0	0	8.16103e-06	4.88373e-05	0	0	0	0	0	0	0	Bacteria; Proteobacteria; Gammaproteobacteria; Thiotrichales; Piscirickettsiaceae; Methylophaga; uncultured bacterium
New,CleanUp,ReferenceOTU1109068	8.82459e-06	2.69034e-05	1.22515e-05	1.22655e-05	0	1.02013e-06	0	0	0	0	0	0	0	0	Bacteria; Proteobacteria; Alphaproteobacteria; Rhodospirillales; Rhodospirillaceae; Defluviicoccus
GQ349430,1,1335	4.4123e-06	4.90592e-05	2.22755e-06	2.45309e-06	0	3.06038e-06	0	0	0	0	0	0	0	0	Bacteria; Proteobacteria; Alphaproteobacteria; Rhodospirillales; Rhodospirillaceae; uncultured; uncultured alpha proteobacterium
New,CleanUp,ReferenceOTU812588	2.94153e-05	0	2.33893e-05	7.35928e-06	0	1.02013e-06	0	0	0	0	0	0	0	0	Bacteria; Candidate division OD1; uncultured bacterium; uncultured bacterium; uncultured bacterium; uncultured bacterium; uncultured bacterium
FN553515,1,1520	4.4123e-06	4.58941e-05	4.4551e-06	3.67964e-06	0	0	2.63985e-06	0	0	0	0	0	0	0	Bacteria; Gemmatimonadetes; Gemmatimonadetes; BD2-11 terrestrial group; uncultured bacterium; uncultured bacterium; uncultured bacterium
New,CleanUp,ReferenceOTU920751	2.05907e-05	0	0	4.0476e-05	0	0	0	0	0	0	0	0	0	0	Unassigned
New,CleanUp,ReferenceOTU470338	1.912e-05	3.16511e-06	3.00719e-05	8.58583e-06	0	0	0	0	0	0	0	0	0	0	Bacteria; Chloroflexi; SAR202 clade
New,CleanUp,ReferenceOTU838485	2.79445e-05	1.4243e-05	8.9102e-06	9.81238e-06	0	0	0	0	0	0	0	0	0	0	Bacteria; Chloroflexi; SAR202 clade; uncultured bacterium; uncultured bacterium; uncultured bacterium; uncultured bacterium
New,CleanUp,ReferenceOTU729182	2.94153e-06	3.63987e-05	1.78204e-05	3.67964e-06	0	0	0	0	0	0	0	0	0	0	Bacteria; Acidobacteria; Holophagae; Subgroup 10; NS72; uncultured Acidobacteria bacterium; uncultured Acidobacteria bacterium
FR685144,1,1478	4.4123e-06	3.32336e-05	1.11378e-06	2.20778e-05	0	0	0	0	0	0	0	0	0	0	Bacteria; Proteobacteria; Gammaproteobacteria; Oceanospirillales; SAR86 clade; uncultured marine bacterium; uncultured marine bacterium
New,CleanUp,ReferenceOTU193879	5.88306e-06	3.95638e-05	5.56888e-06	9.81238e-06	0	0	0	0	0	0	0	0	0	0	Bacteria; Proteobacteria; Gammaproteobacteria; Legionellales; Coxiellaceae; Coxiella; uncultured bacterium
JN229994,1,1489	1.61784e-05	1.74081e-05	1.78204e-05	7.35928e-06	0	2.04026e-06	0	0	0	0	0	0	0	0	Bacteria; Proteobacteria; Deltaproteobacteria; Sh765B-TzT-29; uncultured bacterium; uncultured bacterium; uncultured bacterium
AF035721,1,1427	1.47077e-06	0	0	1.22655e-06	0	0	5.80768e-05	0	0	0	0	0	0	0	Bacteria; Proteobacteria; Gammaproteobacteria; Oceanospirillales; SUP05 cluster; uncultured gamma proteobacterium; uncultured gamma proteobacterium
DQ317683,1,1276	1.32369e-05	4.2729e-05	1.11378e-06	3.67964e-06	0	0	0	0	0	0	0	0	0	0	Bacteria; Proteobacteria; Gammaproteobacteria; Vibrionales; Vibrionaceae; Photobacterium
New,CleanUp,ReferenceOTU140740	1.32369e-05	0	4.12097e-05	6.13273e-06	0	0	0	0	0	0	0	0	0	0	Unassigned
JF747659,1,1515	1.47077e-06	3.95638e-05	1.11378e-06	1.83982e-05	0	0	0	0	0	0	0	0	0	0	Bacteria; Acidobacteria; Acidobacteria; Subgroup 6; uncultured Acidobacteria bacterium; uncultured Acidobacteria bacterium; uncultured Acidobacteria bacterium
New,CleanUp,ReferenceOTU1011923	1.61784e-05	1.58255e-05	2.11617e-05	7.35928e-06	0	0	0	0	0	0	0	0	0	0	Bacteria; Chloroflexi; SAR202 clade
GU108528,1,1398	1.17661e-05	0	2.11617e-05	2.08513e-05	0	4.08051e-06	2.63985e-06	0	0	0	0	0	0	0	Bacteria; Proteobacteria; Gammaproteobacteria; Alteromonadales; Alteromonadaceae; Alteromonas
New,CleanUp,ReferenceOTU587001	2.35322e-05	0	1.67066e-05	1.71717e-05	0	3.06038e-06	0	0	0	0	0	0	0	0	Bacteria; Proteobacteria; Deltaproteobacteria; SAR324 clade(Marine group B); uncultured bacterium; uncultured bacterium; uncultured bacterium
AB252930,1,1452	2.79445e-05	1.26604e-05	1.78204e-05	0	0	2.04026e-06	0	0	0	0	0	0	0	0	Bacteria; Proteobacteria; Alphaproteobacteria; Caulobacterales; Caulobacteraceae; uncultured; uncultured bacterium
DQ396144,1,1515	4.4123e-06	3.16511e-06	1.33653e-05	1.22655e-05	0	6.12077e-06	2.11188e-05	0	0	0	0	0	0	0	Bacteria; Proteobacteria; Gammaproteobacteria; Alteromonadales; Alteromonadaceae; Marinobacter
GQ377828,1,1263	1.76492e-05	4.2729e-05	0	0	0	0	0	0	0	0	0	0	0	0	Bacteria; Proteobacteria; Gammaproteobacteria; Salinisphaerales; Salinisphaeraceae; ZD0417 marine group; uncultured bacterium
New,CleanUp,ReferenceOTU633481	7.35383e-06	3.63987e-05	5.56888e-06	1.10389e-05	0	0	0	0	0	0	0	0	0	0	Bacteria; Acidobacteria; Acidobacteria; Subgroup 6
GU940847,1,1388	1.32369e-05	2.05732e-05	2.22755e-06	1.71717e-05	0	7.1409e-06	0	0	0	0	0	0	0	0	Bacteria; Deferribacteres; Deferribacteres; Deferribacterales; SAR406 clade(Marine group A); uncultured bacterium; uncultured bacterium
JX016841,1,1461	2.35322e-05	2.21558e-05	0	1.3492e-05	0	1.02013e-06	0	0	0	0	0	0	0	0	Bacteria; Proteobacteria; Alphaproteobacteria; Rickettsiales; S25-593; uncultured bacterium; uncultured bacterium
New,CleanUp,ReferenceOTU868018	1.912e-05	1.74081e-05	2.11617e-05	2.45309e-06	0	0	0	0	0	0	0	0	0	0	Bacteria; Proteobacteria; Gammaproteobacteria; Oceanospirillales; Halomonadaceae; Halomonas; uncultured bacterium
KC545719,1,1421	2.64738e-05	1.89906e-05	2.22755e-06	1.22655e-05	0	0	0	0	0	0	0	0	0	0	Bacteria; Proteobacteria; Alphaproteobacteria; SAR11 clade; Deep 1; uncultured bacterium; uncultured bacterium
New,CleanUp,ReferenceOTU1048124	1.32369e-05	2.37383e-05	1.55929e-05	7.35928e-06	0	0	0	0	0	0	0	0	0	0	Bacteria; Deferribacteres; Deferribacteres; Deferribacterales; SAR406 clade(Marine group A); uncultured bacterium; uncultured bacterium
JX120409,1,1498	1.76492e-05	2.69034e-05	7.79643e-06	6.13273e-06	0	0	1.31993e-06	0	0	0	0	0	0	0	Bacteria; Acidobacteria; Acidobacteria; Subgroup 2; uncultured bacterium; uncultured bacterium; uncultured bacterium
HQ673316,1,1520	3.08861e-05	1.26604e-05	0	1.22655e-05	0	0	3.95978e-06	0	0	0	0	0	0	0	Bacteria; Deferribacteres; Deferribacteres; Deferribacterales; SAR406 clade(Marine group A); uncultured bacterium; uncultured bacterium
New,CleanUp,ReferenceOTU415178	2.5003e-05	0	3.34133e-05	1.22655e-06	0	0	0	0	0	0	0	0	0	0	Bacteria; Proteobacteria; Gammaproteobacteria; Alteromonadales; Idiomarinaceae; Idiomarina
New,CleanUp,ReferenceOTU613529	0	4.2729e-05	3.34133e-06	1.3492e-05	0	0	0	0	0	0	0	0	0	0	Bacteria; Chloroflexi; JG30-KF-CM66; uncultured Chloroflexi bacterium; uncultured Chloroflexi bacterium; uncultured Chloroflexi bacterium; uncultured Chloroflexi bacterium
HM798600,1,1468	3.08861e-05	1.58255e-06	2.11617e-05	4.90619e-06	0	1.02013e-06	0	0	0	0	0	0	0	0	Bacteria; Proteobacteria; Deltaproteobacteria; GR-WP33-30; uncultured delta proteobacterium; uncultured delta proteobacterium; uncultured delta proteobacterium
JX435621,1,1273	7.35383e-06	3.95638e-05	3.34133e-06	0	0	0	9.23948e-06	0	0	0	0	0	0	0	Bacteria; Proteobacteria; Gammaproteobacteria; Vibrionales; Vibrionaceae; Photobacterium
New,CleanUp,ReferenceOTU159552	2.20615e-05	1.4243e-05	1.44791e-05	7.35928e-06	0	0	1.31993e-06	0	0	0	0	0	0	0	Bacteria; Proteobacteria; Alphaproteobacteria; Rhodospirillales; Rhodospirillaceae; OM75 clade
New,CleanUp,ReferenceOTU184592	2.05907e-05	2.8486e-05	6.68265e-06	3.67964e-06	0	0	0	0	0	0	0	0	0	0	Bacteria; Chloroflexi; SAR202 clade; uncultured Chloroflexus sp,; uncultured Chloroflexus sp,; uncultured Chloroflexus sp,; uncultured Chloroflexus sp,
FR685785,1,1362	2.94153e-05	7.91277e-06	0	2.20778e-05	0	0	0	0	0	0	0	0	0	0	Bacteria; Proteobacteria; Alphaproteobacteria; Rickettsiales; SAR116 clade; uncultured bacterium; uncultured bacterium
New,CleanUp,ReferenceOTU716631	0	3.79813e-05	4.4551e-06	8.58583e-06	0	3.06038e-06	5.27971e-06	0	0	0	0	0	0	0	Bacteria; Planctomycetes; Planctomycetacia; Planctomycetales; Planctomycetaceae; Planctomyces; uncultured bacterium
EU373941,1,1509	1.47077e-05	3.48162e-05	0	9.81238e-06	0	0	0	0	0	0	0	0	0	0	Bacteria; Acidobacteria; Acidobacteria; Subgroup 21; uncultured bacterium; uncultured bacterium; uncultured bacterium
New,CleanUp,ReferenceOTU862885	4.4123e-06	1.4243e-05	2.22755e-05	1.83982e-05	0	0	0	0	0	0	0	0	0	0	Bacteria; Chloroflexi; S085; uncultured bacterium; uncultured bacterium; uncultured bacterium; uncultured bacterium
AB189312,1,1400	1.02954e-05	2.05732e-05	1.44791e-05	9.81238e-06	0	4.08051e-06	0	0	0	0	0	0	0	0	Bacteria; Proteobacteria; Gammaproteobacteria; Oceanospirillales; Halomonadaceae; Halomonas
New,CleanUp,ReferenceOTU326782	0	5.06417e-05	0	8.58583e-06	0	0	0	0	0	0	0	0	0	0	Bacteria; Planctomycetes; Planctomycetacia; Planctomycetales; Planctomycetaceae; Planctomyces; uncultured bacterium
New,CleanUp,ReferenceOTU937050	3.23568e-05	1.10779e-05	6.68265e-06	4.90619e-06	0	4.08051e-06	0	0	0	0	0	0	0	0	Bacteria; Proteobacteria; Alphaproteobacteria; SAR11 clade; Deep 1; uncultured bacterium; uncultured bacterium
HQ673286,1,1455	4.4123e-06	2.69034e-05	4.4551e-06	2.33044e-05	0	0	0	0	0	0	0	0	0	0	Bacteria; Proteobacteria; Alphaproteobacteria; OCS116 clade; uncultured bacterium; uncultured bacterium; uncultured bacterium
GU941027,1,1257	4.4123e-05	4.74766e-06	0	0	0	1.02013e-05	0	0	0	0	0	0	0	0	Bacteria; Cyanobacteria; Chloroplast; uncultured bacterium; uncultured bacterium; uncultured bacterium; uncultured bacterium
HQ241949,1,1431	2.64738e-05	9.49532e-06	2.22755e-06	2.08513e-05	0	0	0	0	0	0	0	0	0	0	Bacteria; Cyanobacteria; Chloroplast; uncultured bacterium; uncultured bacterium; uncultured bacterium; uncultured bacterium
New,CleanUp,ReferenceOTU323855	1.47077e-06	0	2.22755e-06	0	5.42367e-06	4.59058e-05	3.95978e-06	0	0	0	0	0	0	0	Bacteria; Proteobacteria; Gammaproteobacteria; Thiotrichales; Piscirickettsiaceae; endosymbionts
New,CleanUp,ReferenceOTU303123	8.82459e-06	0	5.01199e-05	0	0	0	0	0	0	0	0	0	0	0	Unassigned
New,CleanUp,ReferenceOTU840375	1.17661e-05	3.16511e-05	6.68265e-06	6.13273e-06	0	0	2.63985e-06	0	0	0	0	0	0	0	Bacteria; Acidobacteria; Subgroup 26; uncultured bacterium; uncultured bacterium; uncultured bacterium; uncultured bacterium
New,CleanUp,ReferenceOTU109295	5.88306e-05	0	0	0	0	0	0	0	0	0	0	0	0	0	Bacteria; Proteobacteria; Gammaproteobacteria; Alteromonadales; Idiomarinaceae; Idiomarina
New,CleanUp,ReferenceOTU634361	2.35322e-05	2.8486e-05	5.56888e-06	1.22655e-06	0	0	0	0	0	0	0	0	0	0	Bacteria; Proteobacteria; Gammaproteobacteria; Oceanospirillales; Halomonadaceae; Halomonas
New,CleanUp,ReferenceOTU537582	2.94153e-06	0	5.56888e-05	0	0	0	0	0	0	0	0	0	0	0	Unassigned
New,CleanUp,ReferenceOTU346531	1.02954e-05	2.05732e-05	1.78204e-05	9.81238e-06	0	0	0	0	0	0	0	0	0	0	Bacteria; Proteobacteria; Gammaproteobacteria; Chromatiales; Chromatiaceae; Nitrosococcus; uncultured bacterium
AY375115,1,1467	7.35383e-06	0	4.12097e-05	8.58583e-06	0	0	1.31993e-06	0	0	0	0	0	0	0	Bacteria; Proteobacteria; Gammaproteobacteria; Alteromonadales; Alteromonadaceae; Marinobacter
New,CleanUp,ReferenceOTU531654	1.47077e-05	1.10779e-05	2.67306e-05	4.90619e-06	0	1.02013e-06	0	0	0	0	0	0	0	0	Archaea; Thaumarchaeota; Marine Group I; Unknown Order; Unknown Family; Candidatus Nitrosopumilus
New,CleanUp,ReferenceOTU977449	1.32369e-05	1.4243e-05	2.33893e-05	4.90619e-06	0	0	2.63985e-06	0	0	0	0	0	0	0	Bacteria; Proteobacteria; Deltaproteobacteria; Desulfuromonadales; GR-WP33-58; uncultured bacterium; uncultured bacterium
New,CleanUp,ReferenceOTU1093662	2.79445e-05	0	0	0	0	0	3.03583e-05	0	0	0	0	0	0	0	Unassigned
New,CleanUp,ReferenceOTU914473	1.47077e-05	2.37383e-05	1.0024e-05	9.81238e-06	0	0	0	0	0	0	0	0	0	0	Bacteria; Proteobacteria; Alphaproteobacteria; Rhodospirillales; Rhodospirillaceae; uncultured
HQ674511,1,1435	1.76492e-05	2.37383e-05	4.4551e-06	1.10389e-05	0	0	1.31993e-06	0	0	0	0	0	0	0	Bacteria; Proteobacteria; Alphaproteobacteria; SAR11 clade; Deep 1
New,CleanUp,ReferenceOTU846128	0	5.69719e-05	1.11378e-06	0	0	0	0	0	0	0	0	0	0	0	Bacteria; Chloroflexi; TK10; uncultured bacterium; uncultured bacterium; uncultured bacterium; uncultured bacterium
New,CleanUp,ReferenceOTU710939	2.79445e-05	1.58255e-05	4.4551e-06	9.81238e-06	0	0	0	0	0	0	0	0	0	0	Bacteria; Spirochaetae; Spirochaetes; Spirochaetales; Spirochaetaceae; Spirochaeta; uncultured Spirochaetes bacterium
JX945367,1,1372	2.35322e-05	1.74081e-05	1.11378e-06	1.59451e-05	0	0	0	0	0	0	0	0	0	0	Bacteria; Cyanobacteria; Cyanobacteria; SubsectionI; FamilyI; Prochlorococcus; uncultured bacterium
New,CleanUp,ReferenceOTU525215	2.05907e-05	3.16511e-06	2.56168e-05	8.58583e-06	0	0	0	0	0	0	0	0	0	0	Bacteria; Proteobacteria; Gammaproteobacteria; Alteromonadales; Idiomarinaceae; Idiomarina
New,CleanUp,ReferenceOTU414293	3.52984e-05	7.91277e-06	1.0024e-05	3.67964e-06	0	1.02013e-06	0	0	0	0	0	0	0	0	Bacteria; Actinobacteria; Acidimicrobiia; Acidimicrobiales; OM1 clade; uncultured bacterium; uncultured bacterium
New,CleanUp,ReferenceOTU237373	2.94153e-05	1.26604e-05	1.33653e-05	2.45309e-06	0	0	0	0	0	0	0	0	0	0	Bacteria; Proteobacteria; Alphaproteobacteria; SAR11 clade; Deep 1; uncultured bacterium; uncultured bacterium
EU491883,1,1428	2.79445e-05	2.05732e-05	4.4551e-06	4.90619e-06	0	0	0	0	0	0	0	0	0	0	Bacteria; Proteobacteria; Alphaproteobacteria; Rhodospirillales; AT-s3-44; uncultured bacterium; uncultured bacterium
New,CleanUp,ReferenceOTU497996	1.47077e-06	0	0	0	0	6.12077e-06	5.01572e-05	0	0	0	0	0	0	0	Unassigned
ATDP01000088,1,1322	0	4.58941e-05	6.68265e-06	0	0	5.10064e-06	0	0	0	0	0	0	0	0	Bacteria; Proteobacteria; Alphaproteobacteria; Sphingomonadales; Sphingomonadaceae; Sphingobium
New,CleanUp,ReferenceOTU507706	1.32369e-05	2.8486e-05	0	1.59451e-05	0	0	0	0	0	0	0	0	0	0	Unassigned
New,CleanUp,ReferenceOTU491451	1.61784e-05	1.89906e-05	1.44791e-05	4.90619e-06	0	3.06038e-06	0	0	0	0	0	0	0	0	Bacteria; Chloroflexi; SAR202 clade
New,CleanUp,ReferenceOTU1130927	1.76492e-05	0	3.11857e-05	6.13273e-06	0	0	2.63985e-06	0	0	0	0	0	0	0	Bacteria; Proteobacteria; Gammaproteobacteria; Alteromonadales; Alteromonadaceae; Marinobacter
DQ396262,1,1512	1.912e-05	1.89906e-05	1.44791e-05	4.90619e-06	0	0	0	0	0	0	0	0	0	0	Bacteria; Proteobacteria; Gammaproteobacteria; Legionellales; Coxiellaceae; Coxiella
New,CleanUp,ReferenceOTU605858	0	5.38068e-05	0	3.67964e-06	0	0	0	0	0	0	0	0	0	0	Bacteria; Deinococcus-Thermus; Deinococci; Deinococcales; Trueperaceae; Truepera; uncultured bacterium
New,CleanUp,ReferenceOTU951928	2.5003e-05	1.58255e-06	1.78204e-05	1.10389e-05	0	2.04026e-06	0	0	0	0	0	0	0	0	Bacteria; Chloroflexi; SAR202 clade
New,CleanUp,ReferenceOTU641181	2.05907e-05	0	3.56408e-05	1.22655e-06	0	0	0	0	0	0	0	0	0	0	Unassigned
New,CleanUp,ReferenceOTU853397	0	4.2729e-05	0	1.47186e-05	0	0	0	0	0	0	0	0	0	0	Bacteria; Chloroflexi; SAR202 clade
KC002434,1,1319	1.61784e-05	3.16511e-05	0	8.58583e-06	0	1.02013e-06	0	0	0	0	0	0	0	0	Bacteria; Proteobacteria; Gammaproteobacteria; Oceanospirillales; SAR86 clade
New,ReferenceOTU2083	1.47077e-05	2.37383e-05	5.56888e-06	1.22655e-05	0	1.02013e-06	0	0	0	0	0	0	0	0	Bacteria; Proteobacteria; Alphaproteobacteria; SAR11 clade; Deep 1; uncultured SAR11 cluster alpha proteobacterium; uncultured SAR11 cluster alpha proteobacterium
New,CleanUp,ReferenceOTU1138614	8.82459e-06	3.63987e-05	2.22755e-06	9.81238e-06	0	0	0	0	0	0	0	0	0	0	Bacteria; Candidate division BRC1; uncultured bacterium; uncultured bacterium; uncultured bacterium; uncultured bacterium; uncultured bacterium
JN886880,1,1482	0	5.22243e-05	0	4.90619e-06	0	0	0	0	0	0	0	0	0	0	Bacteria; Acidobacteria; Acidobacteria; Subgroup 12; uncultured bacterium; uncultured bacterium; uncultured bacterium
New,CleanUp,ReferenceOTU785766	1.912e-05	1.4243e-05	8.9102e-06	1.3492e-05	0	0	1.31993e-06	0	0	0	0	0	0	0	Unassigned
New,CleanUp,ReferenceOTU33016	1.912e-05	1.58255e-06	2.89582e-05	7.35928e-06	0	0	0	0	0	0	0	0	0	0	Bacteria; Proteobacteria; Gammaproteobacteria; Alteromonadales; Idiomarinaceae; Idiomarina
New,CleanUp,ReferenceOTU96491	5.88306e-06	3.48162e-05	8.9102e-06	7.35928e-06	0	0	0	0	0	0	0	0	0	0	Bacteria; Proteobacteria; Deltaproteobacteria; Sh765B-TzT-29
New,CleanUp,ReferenceOTU156888	1.61784e-05	1.26604e-05	1.33653e-05	1.47186e-05	0	0	0	0	0	0	0	0	0	0	Bacteria; Proteobacteria; Gammaproteobacteria; E01-9C-26 marine group
GU061985,1,1501	7.35383e-06	3.16511e-05	6.68265e-06	1.10389e-05	0	0	0	0	0	0	0	0	0	0	Bacteria; Proteobacteria; Gammaproteobacteria; Legionellales; Coxiellaceae; Coxiella; uncultured bacterium
New,CleanUp,ReferenceOTU429951	5.88306e-06	1.74081e-05	3.34133e-05	0	0	0	0	0	0	0	0	0	0	0	Unassigned
EU799778,1,1221	1.47077e-05	2.8486e-05	0	1.3492e-05	0	0	0	0	0	0	0	0	0	0	Bacteria; Proteobacteria; Alphaproteobacteria; Rhodobacterales; Rhodobacteraceae; uncultured; uncultured bacterium
New,CleanUp,ReferenceOTU143399	1.76492e-05	1.58255e-06	1.89342e-05	1.83982e-05	0	0	0	0	0	0	0	0	0	0	Bacteria; Proteobacteria; Alphaproteobacteria; Rhodospirillales; Rhodospirillaceae; Defluviicoccus
New,CleanUp,ReferenceOTU671871	7.35383e-06	1.26604e-05	4.4551e-06	2.94371e-05	0	0	2.63985e-06	0	0	0	0	0	0	0	Bacteria; Chloroflexi; SAR202 clade; uncultured bacterium; uncultured bacterium; uncultured bacterium; uncultured bacterium
AM997773,1,1503	2.64738e-05	0	3.00719e-05	0	0	0	0	0	0	0	0	0	0	0	Bacteria; Planctomycetes; Planctomycetacia; Planctomycetales; Planctomycetaceae; uncultured
New,ReferenceOTU878	2.20615e-05	1.74081e-05	1.33653e-05	3.67964e-06	0	0	0	0	0	0	0	0	0	0	Unassigned
GU940871,1,1321	7.35383e-06	2.21558e-05	0	2.6984e-05	0	0	0	0	0	0	0	0	0	0	Bacteria; Proteobacteria; Alphaproteobacteria; SAR11 clade; uncultured bacterium; uncultured bacterium; uncultured bacterium
New,CleanUp,ReferenceOTU66378	1.47077e-05	1.58255e-05	2.22755e-05	3.67964e-06	0	0	0	0	0	0	0	0	0	0	Bacteria; Candidate division OD1; uncultured bacterium; uncultured bacterium; uncultured bacterium; uncultured bacterium; uncultured bacterium
New,CleanUp,ReferenceOTU520672	4.4123e-06	4.11464e-05	1.11378e-06	9.81238e-06	0	0	0	0	0	0	0	0	0	0	Bacteria; Chloroflexi; SAR202 clade; uncultured bacterium; uncultured bacterium; uncultured bacterium; uncultured bacterium
GU061822,1,1514	0	4.90592e-05	0	7.35928e-06	0	0	0	0	0	0	0	0	0	0	Bacteria; Proteobacteria; Gammaproteobacteria; Oceanospirillales; SAR86 clade; uncultured bacterium; uncultured bacterium
New,CleanUp,ReferenceOTU358448	2.94153e-05	0	2.22755e-05	3.67964e-06	0	1.02013e-06	0	0	0	0	0	0	0	0	Bacteria; Proteobacteria; Deltaproteobacteria; Bdellovibrionales; Bacteriovoracaceae; uncultured
New,CleanUp,ReferenceOTU555223	2.05907e-05	1.58255e-06	2.56168e-05	8.58583e-06	0	0	0	0	0	0	0	0	0	0	Bacteria; Proteobacteria; Alphaproteobacteria; SAR11 clade; Surface 1
JN874211,1,1547	4.4123e-06	3.00685e-05	2.22755e-06	1.96248e-05	0	0	0	0	0	0	0	0	0	0	Bacteria; Lentisphaerae; SS1-B-03-39; uncultured bacterium; uncultured bacterium; uncultured bacterium; uncultured bacterium
New,CleanUp,ReferenceOTU700326	1.17661e-05	1.74081e-05	0	2.57575e-05	0	0	1.31993e-06	0	0	0	0	0	0	0	Unassigned
New,CleanUp,ReferenceOTU60651	5.14768e-05	4.74766e-06	0	0	0	0	0	0	0	0	0	0	0	0	Unassigned
New,CleanUp,ReferenceOTU712242	2.79445e-05	2.05732e-05	6.68265e-06	0	0	1.02013e-06	0	0	0	0	0	0	0	0	Bacteria; Proteobacteria; Deltaproteobacteria; Myxococcales; uncultured; uncultured bacterium; uncultured bacterium
HQ674193,1,1521	7.35383e-06	3.16511e-05	0	1.71717e-05	0	0	0	0	0	0	0	0	0	0	Bacteria; Proteobacteria; Gammaproteobacteria
JN874375,1,1485	1.02954e-05	1.89906e-05	1.33653e-05	1.3492e-05	0	0	0	0	0	0	0	0	0	0	Bacteria; Bacteroidetes; Flavobacteriia; Flavobacteriales; Cryomorphaceae; Fluviicola; uncultured bacterium
New,CleanUp,ReferenceOTU1122391	4.55937e-05	1.58255e-06	8.9102e-06	0	0	0	0	0	0	0	0	0	0	0	Bacteria; Proteobacteria; Gammaproteobacteria; Oceanospirillales; Halomonadaceae; Halomonas
FJ745206,1,1366	2.05907e-05	2.21558e-05	0	1.22655e-05	0	1.02013e-06	0	0	0	0	0	0	0	0	Bacteria; Proteobacteria; Gammaproteobacteria; Alteromonadales; Alteromonadaceae; OM60(NOR5) clade; uncultured bacterium
New,ReferenceOTU1782	2.20615e-05	0	1.89342e-05	1.10389e-05	0	0	3.95978e-06	0	0	0	0	0	0	0	Bacteria; Proteobacteria; Gammaproteobacteria; Alteromonadales; Alteromonadaceae; Alteromonas
JN018915,1,1419	0	3.00685e-05	0	2.57575e-05	0	0	0	0	0	0	0	0	0	0	Bacteria; Deferribacteres; Deferribacteres; Deferribacterales; SAR406 clade(Marine group A); uncultured bacterium; uncultured bacterium
HQ673686,1,1458	0	2.8486e-05	2.11617e-05	6.13273e-06	0	0	0	0	0	0	0	0	0	0	Bacteria; Acidobacteria; Acidobacteria; Subgroup 3; PAUC26f; uncultured Acidobacteria bacterium; uncultured Acidobacteria bacterium
New,CleanUp,ReferenceOTU312769	4.4123e-06	0	3.89821e-05	0	0	1.22415e-05	0	0	0	0	0	0	0	0	Bacteria; Proteobacteria; Gammaproteobacteria; Oceanospirillales; Halomonadaceae; Halomonas
New,CleanUp,ReferenceOTU358930	2.94153e-05	9.49532e-06	1.67066e-05	0	0	0	0	0	0	0	0	0	0	0	Bacteria; Proteobacteria; Gammaproteobacteria; Oceanospirillales; Halomonadaceae; Halomonas
New,CleanUp,ReferenceOTU732007	1.47077e-05	3.00685e-05	2.22755e-06	8.58583e-06	0	0	0	0	0	0	0	0	0	0	Unassigned
New,CleanUp,ReferenceOTU145755	1.02954e-05	2.37383e-05	1.78204e-05	3.67964e-06	0	0	0	0	0	0	0	0	0	0	Unassigned
New,ReferenceOTU1924	3.82399e-05	7.91277e-06	2.22755e-06	6.13273e-06	0	1.02013e-06	0	0	0	0	0	0	0	0	Bacteria; Proteobacteria; Gammaproteobacteria; Oceanospirillales; SUP05 cluster; uncultured gamma proteobacterium; uncultured gamma proteobacterium
New,CleanUp,ReferenceOTU409898	1.76492e-05	2.05732e-05	1.11378e-05	6.13273e-06	0	0	0	0	0	0	0	0	0	0	Bacteria; Chloroflexi; SAR202 clade; uncultured Chloroflexi bacterium; uncultured Chloroflexi bacterium; uncultured Chloroflexi bacterium; uncultured Chloroflexi bacterium
New,CleanUp,ReferenceOTU732636	1.32369e-05	1.4243e-05	1.44791e-05	1.3492e-05	0	0	0	0	0	0	0	0	0	0	Bacteria; Deferribacteres; Deferribacteres; Deferribacterales; SAR406 clade(Marine group A); uncultured bacterium; uncultured bacterium
New,CleanUp,ReferenceOTU292697	1.47077e-06	0	0	0	0	5.10064e-06	4.88373e-05	0	0	0	0	0	0	0	Bacteria; Proteobacteria; Epsilonproteobacteria; R103-B63; uncultured bacterium; uncultured bacterium; uncultured bacterium
DI196099,1,1411	1.76492e-05	6.33022e-06	1.33653e-05	1.10389e-05	0	3.06038e-06	3.95978e-06	0	0	0	0	0	0	0	Bacteria; Proteobacteria; Alphaproteobacteria; Sphingomonadales; Erythrobacteraceae; Altererythrobacter; uncultured bacterium
New,CleanUp,ReferenceOTU892505	1.47077e-06	2.37383e-05	2.89582e-05	1.22655e-06	0	0	0	0	0	0	0	0	0	0	Bacteria; Proteobacteria; Gammaproteobacteria; Legionellales; Coxiellaceae; Coxiella; uncultured bacterium
HM598172,1,1510	0	3.00685e-05	1.67066e-05	8.58583e-06	0	0	0	0	0	0	0	0	0	0	Bacteria; Planctomycetes; Planctomycetacia; Planctomycetales; Planctomycetaceae; Planctomyces; uncultured bacterium
FN433452,1,1472	7.35383e-06	1.10779e-05	1.11378e-05	2.57575e-05	0	0	0	0	0	0	0	0	0	0	Bacteria; Bacteroidetes; Flavobacteriia; Flavobacteriales; NS9 marine group; uncultured Flavobacteriia bacterium; uncultured Flavobacteriia bacterium
New,CleanUp,ReferenceOTU303719	1.61784e-05	1.58255e-05	2.0048e-05	1.22655e-06	0	2.04026e-06	0	0	0	0	0	0	0	0	Bacteria; Proteobacteria; Alphaproteobacteria; SAR11 clade; uncultured bacterium; uncultured bacterium; uncultured bacterium
New,CleanUp,ReferenceOTU1056031	3.08861e-05	9.49532e-06	1.11378e-05	3.67964e-06	0	0	0	0	0	0	0	0	0	0	Bacteria; Proteobacteria; Deltaproteobacteria; SAR324 clade(Marine group B); uncultured bacterium; uncultured bacterium; uncultured bacterium
GQ351178,1,1504	1.76492e-05	1.4243e-05	3.34133e-06	1.3492e-05	0	1.02013e-06	5.27971e-06	0	0	0	0	0	0	0	Bacteria; Proteobacteria; Gammaproteobacteria; Oceanospirillales; SUP05 cluster
New,CleanUp,ReferenceOTU253312	1.32369e-05	3.16511e-05	5.56888e-06	2.45309e-06	0	2.04026e-06	0	0	0	0	0	0	0	0	Unassigned
DQ396007,1,1499	1.17661e-05	3.48162e-05	2.22755e-06	6.13273e-06	0	0	0	0	0	0	0	0	0	0	Bacteria; Proteobacteria; Gammaproteobacteria; Oceanospirillales; Halomonadaceae; Halomonas
KC294828,1,1388	1.17661e-05	1.89906e-05	1.44791e-05	7.35928e-06	0	1.02013e-06	1.31993e-06	0	0	0	0	0	0	0	Bacteria; Proteobacteria; Alphaproteobacteria; SAR11 clade; Surface 1
New,CleanUp,ReferenceOTU90544	2.05907e-05	0	2.45031e-05	9.81238e-06	0	0	0	0	0	0	0	0	0	0	Bacteria; Proteobacteria; Alphaproteobacteria; SAR11 clade; Surface 1; uncultured bacterium; uncultured bacterium
DQ156391,1,1263	3.08861e-05	7.91277e-06	4.4551e-06	8.58583e-06	0	3.06038e-06	0	0	0	0	0	0	0	0	Archaea; Euryarchaeota; Thermoplasmata; Thermoplasmatales; Marine Group II; uncultured archaeon; uncultured archaeon
New,CleanUp,ReferenceOTU70828	1.76492e-05	2.37383e-05	0	1.3492e-05	0	0	0	0	0	0	0	0	0	0	Bacteria; Chloroflexi; SAR202 clade; uncultured Chloroflexi bacterium; uncultured Chloroflexi bacterium; uncultured Chloroflexi bacterium; uncultured Chloroflexi bacterium
HQ673123,1,1523	3.23568e-05	6.33022e-06	1.0024e-05	6.13273e-06	0	0	0	0	0	0	0	0	0	0	Bacteria; Proteobacteria; Deltaproteobacteria; Myxococcales; uncultured; uncultured bacterium; uncultured bacterium
New,CleanUp,ReferenceOTU620258	0	1.4243e-05	1.22515e-05	2.82106e-05	0	0	0	0	0	0	0	0	0	0	Bacteria; Proteobacteria; Deltaproteobacteria; Myxococcales; 0319-6G20
DQ396204,1,1513	7.35383e-06	1.89906e-05	2.22755e-05	0	1.08473e-06	1.02013e-06	3.95978e-06	0	0	0	0	0	0	0	Bacteria; Proteobacteria; Alphaproteobacteria; Sphingomonadales; Erythrobacteraceae; Erythrobacter
EF573122,1,1485	4.85353e-05	0	0	6.13273e-06	0	0	0	0	0	0	0	0	0	0	Bacteria; Bacteroidetes; Cytophagia; Cytophagales; Flammeovirgaceae; Marinoscillum
New,CleanUp,ReferenceOTU753036	1.47077e-06	0	0	0	5.3152e-05	0	0	0	0	0	0	0	0	0	Bacteria; Planctomycetes; Phycisphaerae; Phycisphaerales; Phycisphaeraceae; Urania-1B-19 marine sediment group; uncultured bacterium
New,CleanUp,ReferenceOTU404176	3.52984e-05	4.74766e-06	1.44791e-05	0	0	0	0	0	0	0	0	0	0	0	Bacteria; Proteobacteria; Gammaproteobacteria; Oceanospirillales; SUP05 cluster; uncultured bacterium; uncultured bacterium
New,CleanUp,ReferenceOTU500703	2.35322e-05	3.16511e-06	1.78204e-05	4.90619e-06	0	5.10064e-06	0	0	0	0	0	0	0	0	Bacteria; Proteobacteria; Alphaproteobacteria
New,CleanUp,ReferenceOTU713068	1.912e-05	2.53209e-05	1.0024e-05	0	0	0	0	0	0	0	0	0	0	0	Unassigned
New,CleanUp,ReferenceOTU362144	1.32369e-05	1.58255e-05	1.55929e-05	6.13273e-06	0	1.02013e-06	2.63985e-06	0	0	0	0	0	0	0	Bacteria; Proteobacteria; Gammaproteobacteria; Xanthomonadales; JTB255 marine benthic group
New,CleanUp,ReferenceOTU278912	2.05907e-05	1.10779e-05	1.33653e-05	7.35928e-06	0	2.04026e-06	0	0	0	0	0	0	0	0	Bacteria; Chloroflexi; SAR202 clade; uncultured bacterium; uncultured bacterium; uncultured bacterium; uncultured bacterium
HQ673762,1,1459	1.32369e-05	2.53209e-05	2.22755e-06	1.22655e-05	0	0	1.31993e-06	0	0	0	0	0	0	0	Bacteria; Proteobacteria; Alphaproteobacteria; Rhodospirillales; Rhodospirillaceae; Defluviicoccus; uncultured bacterium
EU686597,24796,26348	0	5.06417e-05	0	3.67964e-06	0	0	0	0	0	0	0	0	0	0	Bacteria; Lentisphaerae; LD1-PA34; uncultured bacterium; uncultured bacterium; uncultured bacterium; uncultured bacterium
HQ673150,1,1516	1.32369e-05	2.37383e-05	1.22515e-05	4.90619e-06	0	0	0	0	0	0	0	0	0	0	Bacteria; Deferribacteres; Deferribacteres; Deferribacterales; SAR406 clade(Marine group A); uncultured bacterium; uncultured bacterium
New,CleanUp,ReferenceOTU391824	3.23568e-05	9.49532e-06	1.22515e-05	0	0	0	0	0	0	0	0	0	0	0	Unassigned
New,ReferenceOTU1825	2.05907e-05	3.16511e-06	2.78444e-05	2.45309e-06	0	0	0	0	0	0	0	0	0	0	Bacteria; Proteobacteria; Gammaproteobacteria; Alteromonadales; Idiomarinaceae; Idiomarina
New,CleanUp,ReferenceOTU41827	0	2.21558e-05	0	3.18902e-05	0	0	0	0	0	0	0	0	0	0	Archaea; Thaumarchaeota; Terrestrial Hot Spring Gp(THSCG); uncultured marine microorganism HF4000_APKG10H11; uncultured marine microorganism HF4000_APKG10H11; uncultured marine microorganism HF4000_APKG10H11; uncultured marine microorganism HF4000_APKG10H11
KC001823,1,1305	2.20615e-05	2.21558e-05	0	9.81238e-06	0	0	0	0	0	0	0	0	0	0	Bacteria; Proteobacteria; Deltaproteobacteria; Bdellovibrionales; Bdellovibrionaceae; OM27 clade
New,CleanUp,ReferenceOTU496659	2.35322e-05	4.74766e-06	1.22515e-05	1.3492e-05	0	0	0	0	0	0	0	0	0	0	Bacteria; NPL-UPA2; uncultured candidate division BRC1 bacterium; uncultured candidate division BRC1 bacterium; uncultured candidate division BRC1 bacterium; uncultured candidate division BRC1 bacterium; uncultured candidate division BRC1 bacterium
New,CleanUp,ReferenceOTU840052	4.26522e-05	7.91277e-06	2.22755e-06	1.22655e-06	0	0	0	0	0	0	0	0	0	0	Bacteria; Cyanobacteria; ML635J-21; uncultured bacterium; uncultured bacterium; uncultured bacterium; uncultured bacterium
GU061382,1,1501	1.32369e-05	2.69034e-05	8.9102e-06	4.90619e-06	0	0	0	0	0	0	0	0	0	0	Bacteria; Proteobacteria; Gammaproteobacteria; Legionellales; Coxiellaceae; Coxiella; uncultured bacterium
New,CleanUp,ReferenceOTU241383	0	2.69034e-05	0	2.6984e-05	0	0	0	0	0	0	0	0	0	0	Bacteria; Chloroflexi; SAR202 clade; uncultured bacterium; uncultured bacterium; uncultured bacterium; uncultured bacterium
New,CleanUp,ReferenceOTU437654	0	2.69034e-05	0	2.6984e-05	0	0	0	0	0	0	0	0	0	0	Bacteria; Chloroflexi; SAR202 clade
New,CleanUp,ReferenceOTU732076	2.20615e-05	3.16511e-06	2.0048e-05	8.58583e-06	0	0	0	0	0	0	0	0	0	0	Bacteria; Chloroflexi; SAR202 clade
New,CleanUp,ReferenceOTU88809	1.76492e-05	0	1.55929e-05	1.83982e-05	0	2.04026e-06	0	0	0	0	0	0	0	0	Bacteria; Proteobacteria; Gammaproteobacteria; Alteromonadales; Alteromonadaceae; Alteromonas
New,CleanUp,ReferenceOTU228868	1.47077e-06	0	0	0	0	3.36642e-05	1.8479e-05	0	0	0	0	0	0	0	Bacteria; Firmicutes; Clostridia; Clostridiales; Defluviitaleaceae; Incertae Sedis; uncultured bacterium
KC705261,1,1258	1.47077e-06	1.4243e-05	0	1.22655e-06	0	1.93824e-05	1.7159e-05	0	0	0	0	0	0	0	Bacteria; Proteobacteria; Gammaproteobacteria; Oceanospirillales; Halomonadaceae; Halomonas
New,ReferenceOTU1681	8.82459e-06	1.4243e-05	2.67306e-05	3.67964e-06	0	0	0	0	0	0	0	0	0	0	Bacteria; Proteobacteria; Gammaproteobacteria; Oceanospirillales; Halomonadaceae; Halomonas
DQ009142,1,1876	4.4123e-06	2.8486e-05	0	1.71717e-05	0	2.04026e-06	1.31993e-06	0	0	0	0	0	0	0	Bacteria; Proteobacteria; Gammaproteobacteria; Oceanospirillales; SAR86 clade; uncultured bacterium; uncultured bacterium
New,CleanUp,ReferenceOTU376159	2.64738e-05	0	1.33653e-05	1.3492e-05	0	0	0	0	0	0	0	0	0	0	Bacteria; Proteobacteria; Gammaproteobacteria; E01-9C-26 marine group; uncultured bacterium; uncultured bacterium; uncultured bacterium
New,CleanUp,ReferenceOTU782479	1.32369e-05	1.58255e-06	2.0048e-05	1.83982e-05	0	0	0	0	0	0	0	0	0	0	Bacteria; Proteobacteria; Gammaproteobacteria; Alteromonadales; Idiomarinaceae; Idiomarina
New,CleanUp,ReferenceOTU599487	1.17661e-05	3.16511e-05	0	9.81238e-06	0	0	0	0	0	0	0	0	0	0	Bacteria; Planctomycetes; Phycisphaerae; Phycisphaerales; Phycisphaeraceae; Phycisphaera; uncultured organism
New,CleanUp,ReferenceOTU1008703	2.20615e-05	1.58255e-06	2.45031e-05	4.90619e-06	0	0	0	0	0	0	0	0	0	0	Unassigned
New,CleanUp,ReferenceOTU699763	1.912e-05	1.10779e-05	1.67066e-05	6.13273e-06	0	0	0	0	0	0	0	0	0	0	Bacteria; Proteobacteria; Alphaproteobacteria; SAR11 clade
KC294642,1,1376	0	1.58255e-06	5.01199e-05	0	0	0	1.31993e-06	0	0	0	0	0	0	0	Bacteria; Proteobacteria; Alphaproteobacteria; Rhodobacterales; Rhodobacteraceae
New,CleanUp,ReferenceOTU68963	1.47077e-06	0	0	0	0	0	5.14771e-05	0	0	0	0	0	0	0	Bacteria; Candidate division OD1; uncultured bacterium; uncultured bacterium; uncultured bacterium; uncultured bacterium; uncultured bacterium
New,CleanUp,ReferenceOTU6547	1.47077e-06	0	0	0	0	0	5.14771e-05	0	0	0	0	0	0	0	Bacteria; Proteobacteria; Gammaproteobacteria; Alteromonadales; Alteromonadaceae
New,CleanUp,ReferenceOTU860687	2.05907e-05	1.89906e-05	1.33653e-05	0	0	0	0	0	0	0	0	0	0	0	Bacteria; Proteobacteria; Deltaproteobacteria; Desulfuromonadales; GR-WP33-58; uncultured bacterium; uncultured bacterium
AB694209,1,1371	1.02954e-05	2.37383e-05	1.44791e-05	0	0	3.06038e-06	1.31993e-06	0	0	0	0	0	0	0	Bacteria; Proteobacteria; Alphaproteobacteria; Rhodospirillales; Rhodospirillaceae; Defluviicoccus; uncultured bacterium
New,CleanUp,ReferenceOTU823560	2.79445e-05	6.33022e-06	8.9102e-06	8.58583e-06	1.08473e-06	0	0	0	0	0	0	0	0	0	Bacteria; Proteobacteria; Deltaproteobacteria; SAR324 clade(Marine group B); uncultured bacterium; uncultured bacterium; uncultured bacterium
New,CleanUp,ReferenceOTU981184	2.20615e-05	9.49532e-06	7.79643e-06	1.3492e-05	0	0	0	0	0	0	0	0	0	0	Bacteria; Chloroflexi; SAR202 clade
New,CleanUp,ReferenceOTU751808	2.20615e-05	1.4243e-05	6.68265e-06	9.81238e-06	0	0	0	0	0	0	0	0	0	0	Unassigned
New,CleanUp,ReferenceOTU180374	4.4123e-06	2.8486e-05	5.56888e-06	1.22655e-05	0	2.04026e-06	0	0	0	0	0	0	0	0	Bacteria; Verrucomicrobia; Arctic97B-4 marine group; uncultured bacterium; uncultured bacterium; uncultured bacterium; uncultured bacterium
New,CleanUp,ReferenceOTU1022738	1.47077e-05	2.69034e-05	1.11378e-05	0	0	0	0	0	0	0	0	0	0	0	Bacteria; Proteobacteria; Gammaproteobacteria; Salinisphaerales; Salinisphaeraceae; ZD0417 marine group; uncultured bacterium
HM187241,1,1433	1.02954e-05	2.21558e-05	5.56888e-06	1.47186e-05	0	0	0	0	0	0	0	0	0	0	Bacteria; Chloroflexi; SAR202 clade; uncultured bacterium; uncultured bacterium; uncultured bacterium; uncultured bacterium
New,CleanUp,ReferenceOTU595290	1.47077e-06	0	5.12337e-05	0	0	0	0	0	0	0	0	0	0	0	Bacteria; Proteobacteria; Gammaproteobacteria; Alteromonadales; Idiomarinaceae; Idiomarina
New,ReferenceOTU1306	1.17661e-05	2.21558e-05	8.9102e-06	9.81238e-06	0	0	0	0	0	0	0	0	0	0	Bacteria; Chloroflexi; SAR202 clade
HM187439,1,1332	0	3.00685e-05	7.79643e-06	1.47186e-05	0	0	0	0	0	0	0	0	0	0	Bacteria; Chloroflexi; P2-11E; uncultured bacterium; uncultured bacterium; uncultured bacterium; uncultured bacterium
New,CleanUp,ReferenceOTU27301	1.912e-05	9.49532e-06	1.78204e-05	6.13273e-06	0	0	0	0	0	0	0	0	0	0	Bacteria; Proteobacteria; Gammaproteobacteria; Oceanospirillales; Halomonadaceae; Halomonas
New,CleanUp,ReferenceOTU740357	2.35322e-05	1.89906e-05	1.0024e-05	0	0	0	0	0	0	0	0	0	0	0	Bacteria; Proteobacteria; Alphaproteobacteria; SAR11 clade; Surface 1; uncultured bacterium; uncultured bacterium
New,CleanUp,ReferenceOTU574315	2.20615e-05	1.26604e-05	1.78204e-05	0	0	0	0	0	0	0	0	0	0	0	Bacteria; Chloroflexi; SAR202 clade
New,CleanUp,ReferenceOTU253733	0	4.2729e-05	0	9.81238e-06	0	0	0	0	0	0	0	0	0	0	Bacteria; Proteobacteria; Alphaproteobacteria; Rhodospirillales; Rhodospirillaceae; AEGEAN-169 marine group; uncultured bacterium
New,CleanUp,ReferenceOTU173689	1.61784e-05	1.89906e-05	0	1.47186e-05	0	0	2.63985e-06	0	0	0	0	0	0	0	Unassigned
New,CleanUp,ReferenceOTU513573	5.88306e-06	1.58255e-06	2.78444e-05	4.90619e-06	0	3.06038e-06	9.23948e-06	0	0	0	0	0	0	0	Bacteria; Proteobacteria; Gammaproteobacteria; Oceanospirillales; Alcanivoracaceae; Alcanivorax
New,CleanUp,ReferenceOTU826708	2.20615e-05	7.91277e-06	1.67066e-05	2.45309e-06	0	2.04026e-06	1.31993e-06	0	0	0	0	0	0	0	Unassigned
New,CleanUp,ReferenceOTU585493	1.76492e-05	2.69034e-05	7.79643e-06	0	0	0	0	0	0	0	0	0	0	0	Bacteria; Proteobacteria; Gammaproteobacteria
EF572715,1,1525	1.47077e-05	2.53209e-05	0	1.22655e-05	0	0	0	0	0	0	0	0	0	0	Bacteria; Deferribacteres; Deferribacteres; Deferribacterales; SAR406 clade(Marine group A); uncultured bacterium; uncultured bacterium
New,CleanUp,ReferenceOTU1016979	2.05907e-05	1.10779e-05	1.44791e-05	6.13273e-06	0	0	0	0	0	0	0	0	0	0	Bacteria; Proteobacteria; Gammaproteobacteria; Oceanospirillales; Halomonadaceae; Halomonas
New,CleanUp,ReferenceOTU178398	1.76492e-05	1.4243e-05	5.56888e-06	1.3492e-05	0	0	1.31993e-06	0	0	0	0	0	0	0	Bacteria; Proteobacteria; Alphaproteobacteria; SAR11 clade; Deep 1; uncultured bacterium; uncultured bacterium
HQ673013,1,1462	1.47077e-05	1.4243e-05	1.22515e-05	1.10389e-05	0	0	0	0	0	0	0	0	0	0	Bacteria; Proteobacteria; Alphaproteobacteria; SAR11 clade; Surface 1; uncultured bacterium; uncultured bacterium
New,CleanUp,ReferenceOTU697993	1.76492e-05	9.49532e-06	1.89342e-05	6.13273e-06	0	0	0	0	0	0	0	0	0	0	Bacteria; Proteobacteria; Gammaproteobacteria; Oceanospirillales; Halomonadaceae; Halomonas; uncultured organism
New,CleanUp,ReferenceOTU1007224	2.35322e-05	0	1.55929e-05	1.10389e-05	0	2.04026e-06	0	0	0	0	0	0	0	0	Bacteria; Proteobacteria; Gammaproteobacteria; Alteromonadales; Alteromonadaceae; Alteromonas
New,CleanUp,ReferenceOTU659837	3.52984e-05	9.49532e-06	1.11378e-06	6.13273e-06	0	0	0	0	0	0	0	0	0	0	Bacteria; Proteobacteria; Gammaproteobacteria; Oceanospirillales; SUP05 cluster
New,CleanUp,ReferenceOTU881977	2.20615e-05	2.21558e-05	7.79643e-06	0	0	0	0	0	0	0	0	0	0	0	Bacteria; Proteobacteria; Gammaproteobacteria; Legionellales; Coxiellaceae; Coxiella
New,CleanUp,ReferenceOTU667437	3.67691e-05	6.33022e-06	8.9102e-06	0	0	0	0	0	0	0	0	0	0	0	Bacteria; Proteobacteria; Deltaproteobacteria; Myxococcales; Phaselicystidaceae; Phaselicystis
New,CleanUp,ReferenceOTU1122691	1.47077e-06	7.91277e-06	2.33893e-05	1.71717e-05	0	2.04026e-06	0	0	0	0	0	0	0	0	Bacteria; Chloroflexi; Ardenticatenia; uncultured; uncultured Chloroflexi bacterium; uncultured Chloroflexi bacterium; uncultured Chloroflexi bacterium
New,CleanUp,ReferenceOTU66244	2.94153e-05	1.10779e-05	7.79643e-06	3.67964e-06	0	0	0	0	0	0	0	0	0	0	Bacteria; Chloroflexi; SAR202 clade; uncultured Chloroflexi bacterium; uncultured Chloroflexi bacterium; uncultured Chloroflexi bacterium; uncultured Chloroflexi bacterium
New,CleanUp,ReferenceOTU167206	2.94153e-06	0	4.90061e-05	0	0	0	0	0	0	0	0	0	0	0	Bacteria; Bacteroidetes; Flavobacteriia; Flavobacteriales; Flavobacteriaceae; Leeuwenhoekiella
KF596538,1,1517	2.5003e-05	3.16511e-06	2.11617e-05	2.45309e-06	0	0	0	0	0	0	0	0	0	0	Bacteria; Proteobacteria; Gammaproteobacteria; Oceanospirillales; OM182 clade
New,CleanUp,ReferenceOTU302843	2.94153e-06	3.00685e-05	8.9102e-06	9.81238e-06	0	0	0	0	0	0	0	0	0	0	Bacteria; Proteobacteria; Deltaproteobacteria; Sh765B-TzT-29; uncultured delta proteobacterium; uncultured delta proteobacterium; uncultured delta proteobacterium
New,CleanUp,ReferenceOTU1066402	7.35383e-06	3.00685e-05	4.4551e-06	9.81238e-06	0	0	0	0	0	0	0	0	0	0	Bacteria; Proteobacteria; TA18; uncultured delta proteobacterium; uncultured delta proteobacterium; uncultured delta proteobacterium; uncultured delta proteobacterium
EF574009,1,1228	2.35322e-05	7.91277e-06	0	1.71717e-05	0	3.06038e-06	0	0	0	0	0	0	0	0	Bacteria; Cyanobacteria; Chloroplast; uncultured bacterium; uncultured bacterium; uncultured bacterium; uncultured bacterium
New,CleanUp,ReferenceOTU485642	1.17661e-05	1.58255e-05	4.4551e-06	1.96248e-05	0	0	0	0	0	0	0	0	0	0	Bacteria; Deferribacteres; Deferribacteres; Deferribacterales; PAUC34f; uncultured bacterium; uncultured bacterium
New,CleanUp,ReferenceOTU451024	2.20615e-05	1.89906e-05	1.11378e-06	6.13273e-06	0	2.04026e-06	1.31993e-06	0	0	0	0	0	0	0	Bacteria; Cyanobacteria; ML635J-21; uncultured bacterium; uncultured bacterium; uncultured bacterium; uncultured bacterium
New,CleanUp,ReferenceOTU83626	2.05907e-05	0	1.89342e-05	1.10389e-05	0	1.02013e-06	0	0	0	0	0	0	0	0	Unassigned
New,CleanUp,ReferenceOTU683476	2.20615e-05	0	2.33893e-05	0	0	6.12077e-06	0	0	0	0	0	0	0	0	Bacteria; Candidate division OD1; uncultured deep-sea bacterium; uncultured deep-sea bacterium; uncultured deep-sea bacterium; uncultured deep-sea bacterium; uncultured deep-sea bacterium
New,CleanUp,ReferenceOTU366586	5.88306e-06	2.69034e-05	8.9102e-06	9.81238e-06	0	0	0	0	0	0	0	0	0	0	Bacteria; Acidobacteria; Acidobacteria; Subgroup 6; uncultured bacterium; uncultured bacterium; uncultured bacterium
New,CleanUp,ReferenceOTU531629	2.35322e-05	0	2.78444e-05	0	0	0	0	0	0	0	0	0	0	0	Unassigned
New,ReferenceOTU1065	5.88306e-06	2.05732e-05	8.9102e-06	1.59451e-05	0	0	0	0	0	0	0	0	0	0	Bacteria; Proteobacteria; Alphaproteobacteria; Rhodospirillales; Rhodospirillaceae; AEGEAN-169 marine group; uncultured bacterium
New,CleanUp,ReferenceOTU753140	2.05907e-05	3.16511e-06	1.89342e-05	8.58583e-06	0	0	0	0	0	0	0	0	0	0	Bacteria; Chloroflexi; SAR202 clade
GU061840,1,1475	7.35383e-06	1.26604e-05	1.89342e-05	1.22655e-05	0	0	0	0	0	0	0	0	0	0	Bacteria; Proteobacteria; Deltaproteobacteria; Bdellovibrionales; Bdellovibrionaceae; OM27 clade; uncultured bacterium
New,CleanUp,ReferenceOTU321815	4.4123e-06	4.2729e-05	0	0	0	0	3.95978e-06	0	0	0	0	0	0	0	Bacteria; Deferribacteres; Deferribacteres; Deferribacterales; SAR406 clade(Marine group A); uncultured marine bacterium; uncultured marine bacterium
New,CleanUp,ReferenceOTU865554	0	3.16511e-05	7.79643e-06	8.58583e-06	0	3.06038e-06	0	0	0	0	0	0	0	0	Bacteria; Proteobacteria; Gammaproteobacteria; Alteromonadales; Alteromonadaceae
GQ348094,1,1391	2.05907e-05	4.74766e-06	1.22515e-05	1.3492e-05	0	0	0	0	0	0	0	0	0	0	Bacteria; Proteobacteria; Deltaproteobacteria; Sh765B-TzT-29; uncultured bacterium; uncultured bacterium; uncultured bacterium
New,CleanUp,ReferenceOTU607551	0	3.32336e-05	5.56888e-06	1.22655e-05	0	0	0	0	0	0	0	0	0	0	Unassigned
JQ198355,1,1354	3.97107e-05	0	1.0024e-05	0	0	0	1.31993e-06	0	0	0	0	0	0	0	Bacteria; Bacteroidetes; Flavobacteriia; Flavobacteriales; Flavobacteriaceae; NS4 marine group
JF703523,1,1392	0	4.43115e-05	2.22755e-06	2.45309e-06	0	2.04026e-06	0	0	0	0	0	0	0	0	Bacteria; Proteobacteria; Alphaproteobacteria; Rhodobacterales; Rhodobacteraceae; Paracoccus
New,CleanUp,ReferenceOTU518203	1.47077e-06	1.89906e-05	1.11378e-06	2.94371e-05	0	0	0	0	0	0	0	0	0	0	Bacteria; Deferribacteres; Deferribacteres; Deferribacterales; SAR406 clade(Marine group A); uncultured bacterium; uncultured bacterium
New,CleanUp,ReferenceOTU1061926	1.47077e-05	3.00685e-05	0	6.13273e-06	0	0	0	0	0	0	0	0	0	0	Bacteria; Proteobacteria; Gammaproteobacteria; Chromatiales; Ectothiorhodospiraceae; Acidiferrobacter
New,CleanUp,ReferenceOTU897943	1.17661e-05	1.58255e-05	1.0024e-05	1.22655e-05	0	1.02013e-06	0	0	0	0	0	0	0	0	Bacteria; Proteobacteria; JTB23; uncultured bacterium; uncultured bacterium; uncultured bacterium; uncultured bacterium
New,CleanUp,ReferenceOTU563441	1.32369e-05	1.58255e-05	1.55929e-05	6.13273e-06	0	0	0	0	0	0	0	0	0	0	Bacteria; Candidate division BRC1; uncultured candidate division BRC1 bacterium; uncultured candidate division BRC1 bacterium; uncultured candidate division BRC1 bacterium; uncultured candidate division BRC1 bacterium; uncultured candidate division BRC1 bacterium
New,CleanUp,ReferenceOTU625287	2.94153e-06	3.16511e-06	4.4551e-05	0	0	0	0	0	0	0	0	0	0	0	Bacteria; Proteobacteria; Gammaproteobacteria; Alteromonadales; Idiomarinaceae; Idiomarina
New,CleanUp,ReferenceOTU396713	0	5.06417e-05	0	0	0	0	0	0	0	0	0	0	0	0	Bacteria; Chloroflexi; TK10; uncultured bacterium; uncultured bacterium; uncultured bacterium; uncultured bacterium
New,CleanUp,ReferenceOTU805454	3.38276e-05	4.74766e-06	1.0024e-05	0	0	2.04026e-06	0	0	0	0	0	0	0	0	Bacteria; Deferribacteres; Deferribacteres; Deferribacterales; SAR406 clade(Marine group A); uncultured Marinimicrobia bacterium; uncultured Marinimicrobia bacterium
New,CleanUp,ReferenceOTU446012	1.32369e-05	2.69034e-05	5.56888e-06	4.90619e-06	0	0	0	0	0	0	0	0	0	0	Bacteria; Proteobacteria; Alphaproteobacteria; SAR11 clade; Deep 1
New,CleanUp,ReferenceOTU993198	2.94153e-05	0	2.11617e-05	0	0	0	0	0	0	0	0	0	0	0	Bacteria; Proteobacteria; Gammaproteobacteria; Alteromonadales; Idiomarinaceae; Idiomarina
New,CleanUp,ReferenceOTU514640	3.23568e-05	1.58255e-06	1.55929e-05	0	0	1.02013e-06	0	0	0	0	0	0	0	0	Unassigned
New,ReferenceOTU1305	1.17661e-05	2.37383e-05	0	1.10389e-05	0	0	3.95978e-06	0	0	0	0	0	0	0	Bacteria; Chloroflexi; SAR202 clade; uncultured Chloroflexi bacterium; uncultured Chloroflexi bacterium; uncultured Chloroflexi bacterium; uncultured Chloroflexi bacterium
New,ReferenceOTU2472	2.20615e-05	0	2.22755e-05	6.13273e-06	0	0	0	0	0	0	0	0	0	0	Bacteria; Proteobacteria; Gammaproteobacteria; Alteromonadales; Idiomarinaceae; Idiomarina
New,CleanUp,ReferenceOTU964826	1.32369e-05	0	3.22995e-05	4.90619e-06	0	0	0	0	0	0	0	0	0	0	Bacteria; Proteobacteria; Gammaproteobacteria; Alteromonadales; Idiomarinaceae; Idiomarina
New,CleanUp,ReferenceOTU177434	7.35383e-06	0	0	4.29291e-05	0	0	0	0	0	0	0	0	0	0	Unassigned
AJ870340,1,943	4.4123e-06	2.05732e-05	1.67066e-05	8.58583e-06	0	0	0	0	0	0	0	0	0	0	Archaea; Thaumarchaeota; Marine Benthic Group A; uncultured crenarchaeote; uncultured crenarchaeote; uncultured crenarchaeote; uncultured crenarchaeote
HQ203849,1,1513	0	3.95638e-05	4.4551e-06	4.90619e-06	0	0	1.31993e-06	0	0	0	0	0	0	0	Bacteria; Verrucomicrobia; Verrucomicrobiae; Verrucomicrobiales; Verrucomicrobiaceae; Persicirhabdus; uncultured bacterium
New,CleanUp,ReferenceOTU1032807	2.05907e-05	1.10779e-05	1.11378e-05	7.35928e-06	0	0	0	0	0	0	0	0	0	0	Bacteria; Verrucomicrobia; Arctic97B-4 marine group; uncultured Verrucomicrobia bacterium; uncultured Verrucomicrobia bacterium; uncultured Verrucomicrobia bacterium; uncultured Verrucomicrobia bacterium
New,ReferenceOTU2010	2.20615e-05	6.33022e-06	1.55929e-05	6.13273e-06	0	0	0	0	0	0	0	0	0	0	Bacteria; Deferribacteres; Deferribacteres; Deferribacterales; SAR406 clade(Marine group A); uncultured Marinimicrobia bacterium; uncultured Marinimicrobia bacterium
KF859620,1,1502	3.08861e-05	4.74766e-06	1.44791e-05	0	0	0	0	0	0	0	0	0	0	0	Bacteria; Bacteroidetes; Flavobacteriia; Flavobacteriales; Flavobacteriaceae; Salegentibacter; uncultured Salegentibacter sp,
New,CleanUp,ReferenceOTU782801	3.38276e-05	6.33022e-06	8.9102e-06	0	0	1.02013e-06	0	0	0	0	0	0	0	0	Bacteria; Proteobacteria; Gammaproteobacteria; Oceanospirillales
HQ163768,1,1360	1.17661e-05	1.10779e-05	2.22755e-05	4.90619e-06	0	0	0	0	0	0	0	0	0	0	Bacteria; Proteobacteria; Deltaproteobacteria; SAR324 clade(Marine group B); uncultured delta proteobacterium; uncultured delta proteobacterium; uncultured delta proteobacterium
New,CleanUp,ReferenceOTU1009927	1.47077e-05	1.74081e-05	1.33653e-05	2.45309e-06	0	2.04026e-06	0	0	0	0	0	0	0	0	Bacteria; Planctomycetes; Planctomycetacia; Planctomycetales; Planctomycetaceae; Planctomyces
New,ReferenceOTU840	3.97107e-05	3.16511e-06	4.4551e-06	0	0	0	2.63985e-06	0	0	0	0	0	0	0	Bacteria; Proteobacteria; Gammaproteobacteria; Oceanospirillales; SUP05 cluster; uncultured gamma proteobacterium; uncultured gamma proteobacterium
New,CleanUp,ReferenceOTU624308	1.47077e-06	0	0	0	0	1.02013e-05	3.82779e-05	0	0	0	0	0	0	0	Bacteria; Proteobacteria; Gammaproteobacteria; Alteromonadales; Psychromonadaceae; Psychromonas
AY345474,1,1354	7.35383e-06	1.58255e-06	7.79643e-06	2.45309e-05	0	7.1409e-06	1.31993e-06	0	0	0	0	0	0	0	Bacteria; Proteobacteria; Gammaproteobacteria; Alteromonadales; Alteromonadaceae; Alteromonas
New,CleanUp,ReferenceOTU885659	2.94153e-06	0	4.67786e-05	0	0	0	0	0	0	0	0	0	0	0	Bacteria; Proteobacteria; Gammaproteobacteria; Alteromonadales; Idiomarinaceae; Idiomarina
EU730987,1,1454	0	2.37383e-05	5.56888e-06	0	0	2.04026e-05	0	0	0	0	0	0	0	0	Bacteria; Proteobacteria; Alphaproteobacteria; Sphingomonadales; Sphingomonadaceae; Sphingobium; uncultured bacterium
New,CleanUp,ReferenceOTU283441	7.35383e-06	3.16511e-05	3.34133e-06	7.35928e-06	0	0	0	0	0	0	0	0	0	0	Bacteria; Chloroflexi; SAR202 clade; uncultured Chloroflexi bacterium; uncultured Chloroflexi bacterium; uncultured Chloroflexi bacterium; uncultured Chloroflexi bacterium
New,CleanUp,ReferenceOTU1013178	2.05907e-05	0	2.78444e-05	1.22655e-06	0	0	0	0	0	0	0	0	0	0	Bacteria; Proteobacteria; Deltaproteobacteria; SAR324 clade(Marine group B); uncultured delta proteobacterium; uncultured delta proteobacterium; uncultured delta proteobacterium
New,CleanUp,ReferenceOTU783949	5.88306e-06	2.8486e-05	7.79643e-06	7.35928e-06	0	0	0	0	0	0	0	0	0	0	Bacteria; Acidobacteria; Acidobacteria; Subgroup 6; uncultured Acidobacteria bacterium; uncultured Acidobacteria bacterium; uncultured Acidobacteria bacterium
JX530773,1,1458	2.20615e-05	1.58255e-05	6.68265e-06	4.90619e-06	0	0	0	0	0	0	0	0	0	0	Bacteria; Proteobacteria; Deltaproteobacteria; Bdellovibrionales; Bdellovibrionaceae; OM27 clade; uncultured proteobacterium
New,CleanUp,ReferenceOTU352647	1.76492e-05	2.37383e-05	5.56888e-06	2.45309e-06	0	0	0	0	0	0	0	0	0	0	Bacteria; Deferribacteres; Deferribacteres; Deferribacterales; PAUC34f; uncultured bacterium; uncultured bacterium
New,CleanUp,ReferenceOTU183224	1.47077e-05	0	3.34133e-05	1.22655e-06	0	0	0	0	0	0	0	0	0	0	Unassigned
New,CleanUp,ReferenceOTU822844	3.08861e-05	0	7.79643e-06	8.58583e-06	0	2.04026e-06	0	0	0	0	0	0	0	0	Bacteria; Proteobacteria; Gammaproteobacteria
New,CleanUp,ReferenceOTU302534	1.17661e-05	2.05732e-05	1.44791e-05	2.45309e-06	0	0	0	0	0	0	0	0	0	0	Bacteria; Proteobacteria; Gammaproteobacteria; Oceanospirillales; Halomonadaceae; Halomonas
New,CleanUp,ReferenceOTU280146	5.88306e-06	2.8486e-05	1.22515e-05	0	0	0	2.63985e-06	0	0	0	0	0	0	0	Bacteria; Bacteroidetes; Flavobacteriia; Flavobacteriales; Flavobacteriaceae; Muricauda
JQ612189,1,1460	0	3.63987e-05	2.22755e-06	8.58583e-06	0	2.04026e-06	0	0	0	0	0	0	0	0	Bacteria; Proteobacteria; Alphaproteobacteria; Rhodospirillales; AT-s3-44; uncultured bacterium; uncultured bacterium
JF809734,1,1378	1.17661e-05	1.58255e-05	1.44791e-05	6.13273e-06	0	1.02013e-06	0	0	0	0	0	0	0	0	Bacteria; Chloroflexi; SAR202 clade; uncultured bacterium; uncultured bacterium; uncultured bacterium; uncultured bacterium
New,CleanUp,ReferenceOTU806364	1.17661e-05	1.4243e-05	1.33653e-05	9.81238e-06	0	0	0	0	0	0	0	0	0	0	Bacteria; Chloroflexi; SAR202 clade; uncultured bacterium; uncultured bacterium; uncultured bacterium; uncultured bacterium
New,CleanUp,ReferenceOTU662544	3.23568e-05	7.91277e-06	8.9102e-06	0	0	0	0	0	0	0	0	0	0	0	Unassigned
New,CleanUp,ReferenceOTU481671	0	3.32336e-05	0	1.59451e-05	0	0	0	0	0	0	0	0	0	0	Bacteria; Gemmatimonadetes; Gemmatimonadetes; BD2-11 terrestrial group
New,CleanUp,ReferenceOTU561527	2.35322e-05	6.33022e-06	1.55929e-05	3.67964e-06	0	0	0	0	0	0	0	0	0	0	Bacteria; Cyanobacteria; ML635J-21; uncultured bacterium; uncultured bacterium; uncultured bacterium; uncultured bacterium
New,ReferenceOTU231	5.88306e-06	1.4243e-05	2.89582e-05	0	0	0	0	0	0	0	0	0	0	0	Bacteria; Proteobacteria; Gammaproteobacteria; Alteromonadales; Idiomarinaceae; Idiomarina
New,CleanUp,ReferenceOTU201172	8.82459e-06	1.26604e-05	1.22515e-05	1.22655e-05	0	3.06038e-06	0	0	0	0	0	0	0	0	Archaea; Thaumarchaeota; pSL12; uncultured marine crenarchaeote AD1000-23-H12; uncultured marine crenarchaeote AD1000-23-H12; uncultured marine crenarchaeote AD1000-23-H12; uncultured marine crenarchaeote AD1000-23-H12
New,CleanUp,ReferenceOTU291297	2.64738e-05	3.16511e-06	1.22515e-05	6.13273e-06	0	1.02013e-06	0	0	0	0	0	0	0	0	Bacteria; Chloroflexi; SAR202 clade
EF659447,1,1373	1.32369e-05	2.37383e-05	0	1.10389e-05	0	1.02013e-06	0	0	0	0	0	0	0	0	Bacteria; Proteobacteria; Alphaproteobacteria; Rickettsiales; SAR116 clade
HQ674434,1,1520	2.05907e-05	3.16511e-06	6.68265e-06	1.71717e-05	0	0	1.31993e-06	0	0	0	0	0	0	0	Bacteria; Deferribacteres; Deferribacteres; Deferribacterales; SAR406 clade(Marine group A); uncultured bacterium; uncultured bacterium
New,CleanUp,ReferenceOTU846404	2.94153e-05	0	1.33653e-05	6.13273e-06	0	0	0	0	0	0	0	0	0	0	Bacteria; Proteobacteria; Gammaproteobacteria; Alteromonadales; Alteromonadaceae; Alteromonas
New,CleanUp,ReferenceOTU145420	1.32369e-05	0	3.56408e-05	0	0	0	0	0	0	0	0	0	0	0	Bacteria; SM2F11
EU491455,1,1507	5.88306e-06	2.8486e-05	2.22755e-06	1.22655e-05	0	0	0	0	0	0	0	0	0	0	Bacteria; Actinobacteria; Thermoleophilia; Solirubrobacterales; Elev-16S-1332; uncultured bacterium; uncultured bacterium
New,CleanUp,ReferenceOTU671173	2.35322e-05	2.53209e-05	0	0	0	0	0	0	0	0	0	0	0	0	Unassigned
GQ347061,1,1387	2.35322e-05	4.74766e-06	6.68265e-06	8.58583e-06	0	0	5.27971e-06	0	0	0	0	0	0	0	Bacteria; Proteobacteria; Gammaproteobacteria; Oceanospirillales; SUP05 cluster
New,CleanUp,ReferenceOTU51040	1.17661e-05	3.48162e-05	2.22755e-06	0	0	0	0	0	0	0	0	0	0	0	Unassigned
New,CleanUp,ReferenceOTU419770	1.02954e-05	1.89906e-05	1.11378e-06	1.83982e-05	0	0	0	0	0	0	0	0	0	0	Bacteria; Chloroflexi; SAR202 clade; uncultured bacterium; uncultured bacterium; uncultured bacterium; uncultured bacterium
New,CleanUp,ReferenceOTU684209	4.4123e-06	2.37383e-05	2.22755e-06	1.83982e-05	0	0	0	0	0	0	0	0	0	0	Bacteria; Chloroflexi; JG30-KF-CM66; uncultured bacterium; uncultured bacterium; uncultured bacterium; uncultured bacterium
GU145548,1,1518	8.82459e-06	1.26604e-05	5.56888e-06	1.96248e-05	0	2.04026e-06	0	0	0	0	0	0	0	0	Bacteria; Proteobacteria; Deltaproteobacteria; Myxococcales; uncultured; uncultured bacterium; uncultured bacterium
GU302454,1,1491	1.02954e-05	1.4243e-05	1.67066e-05	7.35928e-06	0	0	0	0	0	0	0	0	0	0	Bacteria; Proteobacteria; Alphaproteobacteria; Rhodospirillales; Rhodospirillaceae; uncultured; uncultured bacterium
New,CleanUp,ReferenceOTU579510	1.912e-05	1.26604e-05	1.55929e-05	1.22655e-06	0	0	0	0	0	0	0	0	0	0	Bacteria; Proteobacteria; Alphaproteobacteria; SAR11 clade; Surface 1; uncultured bacterium; uncultured bacterium
New,CleanUp,ReferenceOTU804408	4.85353e-05	0	0	0	0	0	0	0	0	0	0	0	0	0	Bacteria; Proteobacteria; Gammaproteobacteria; Pseudomonadales; Moraxellaceae; Alkanindiges
New,CleanUp,ReferenceOTU139517	4.85353e-05	0	0	0	0	0	0	0	0	0	0	0	0	0	Bacteria; Proteobacteria; Gammaproteobacteria; Pseudomonadales; Moraxellaceae; Alkanindiges
HQ163673,1,1381	1.61784e-05	9.49532e-06	2.22755e-06	9.81238e-06	1.08473e-06	3.06038e-06	6.59963e-06	0	0	0	0	0	0	0	Bacteria; Proteobacteria; Gammaproteobacteria; Oceanospirillales; SUP05 cluster
AY627439,1,1193	7.35383e-06	2.8486e-05	6.68265e-06	4.90619e-06	0	1.02013e-06	0	0	0	0	0	0	0	0	Archaea; Thaumarchaeota; Marine Group I; uncultured marine group I thaumarchaeote; uncultured marine group I thaumarchaeote; uncultured marine group I thaumarchaeote; uncultured marine group I thaumarchaeote
New,CleanUp,ReferenceOTU618187	2.94153e-06	3.16511e-05	8.9102e-06	4.90619e-06	0	0	0	0	0	0	0	0	0	0	Bacteria; Proteobacteria; Deltaproteobacteria; Sh765B-TzT-29
New,CleanUp,ReferenceOTU268014	0	1.58255e-06	0	0	0	2.04026e-05	2.63985e-05	0	0	0	0	0	0	0	Bacteria; Proteobacteria; Gammaproteobacteria; Oceanospirillales; SUP05 cluster; uncultured gamma proteobacterium; uncultured gamma proteobacterium
New,CleanUp,ReferenceOTU1004018	1.32369e-05	1.4243e-05	1.0024e-05	6.13273e-06	0	2.04026e-06	2.63985e-06	0	0	0	0	0	0	0	Bacteria; Proteobacteria; Alphaproteobacteria; Sphingomonadales; Erythrobacteraceae; Altererythrobacter; uncultured bacterium
EU799904,1,1223	2.94153e-06	2.69034e-05	0	1.83982e-05	0	0	0	0	0	0	0	0	0	0	Bacteria; Proteobacteria; Alphaproteobacteria; Rhodospirillales; Rhodospirillaceae; uncultured; uncultured alpha proteobacterium
New,CleanUp,ReferenceOTU1122341	1.02954e-05	2.69034e-05	0	1.10389e-05	0	0	0	0	0	0	0	0	0	0	Bacteria; Proteobacteria; Gammaproteobacteria; Xanthomonadales; JTB255 marine benthic group; uncultured bacterium; uncultured bacterium
New,CleanUp,ReferenceOTU678405	1.17661e-05	2.37383e-05	7.79643e-06	4.90619e-06	0	0	0	0	0	0	0	0	0	0	Bacteria; Proteobacteria; Alphaproteobacteria; Rhodospirillales; Rhodospirillaceae; uncultured
EU544861,1,1477	7.35383e-06	2.05732e-05	1.78204e-05	2.45309e-06	0	0	0	0	0	0	0	0	0	0	Bacteria; Proteobacteria; Deltaproteobacteria; Desulfuromonadales; GR-WP33-58; uncultured delta proteobacterium; uncultured delta proteobacterium
EF635236,1,1506	0	1.58255e-06	0	0	0	3.06038e-06	4.35576e-05	0	0	0	0	0	0	0	Bacteria; Proteobacteria; Gammaproteobacteria; Alteromonadales; Colwelliaceae; Colwellia; uncultured bacterium
New,CleanUp,ReferenceOTU183781	1.02954e-05	0	3.78684e-05	0	0	0	0	0	0	0	0	0	0	0	Unassigned
New,CleanUp,ReferenceOTU694759	0	3.00685e-05	3.34133e-06	1.47186e-05	0	0	0	0	0	0	0	0	0	0	Bacteria; Chloroflexi; SAR202 clade
New,CleanUp,ReferenceOTU982297	1.32369e-05	1.58255e-05	5.56888e-06	1.3492e-05	0	0	0	0	0	0	0	0	0	0	Bacteria; Chloroflexi; SAR202 clade; uncultured Chloroflexi bacterium; uncultured Chloroflexi bacterium; uncultured Chloroflexi bacterium; uncultured Chloroflexi bacterium
JN018626,1,910	5.88306e-06	0	3.11857e-05	1.10389e-05	0	0	0	0	0	0	0	0	0	0	Archaea; Euryarchaeota; Thermoplasmata; Thermoplasmatales; Marine Group II; uncultured marine archaeon; uncultured marine archaeon
New,CleanUp,ReferenceOTU271844	1.912e-05	6.33022e-06	1.89342e-05	3.67964e-06	0	0	0	0	0	0	0	0	0	0	Bacteria; Deferribacteres; Deferribacteres; Deferribacterales; PAUC34f; uncultured bacterium; uncultured bacterium
HQ673308,1,1477	8.82459e-06	2.37383e-05	4.4551e-06	1.10389e-05	0	0	0	0	0	0	0	0	0	0	Bacteria; Proteobacteria; Deltaproteobacteria; SAR324 clade(Marine group B); uncultured bacterium; uncultured bacterium; uncultured bacterium
New,CleanUp,ReferenceOTU901448	1.76492e-05	3.16511e-06	1.55929e-05	8.58583e-06	0	3.06038e-06	0	0	0	0	0	0	0	0	Bacteria; Chloroflexi; SAR202 clade; uncultured deep-sea bacterium; uncultured deep-sea bacterium; uncultured deep-sea bacterium; uncultured deep-sea bacterium
New,CleanUp,ReferenceOTU867525	2.20615e-05	1.4243e-05	5.56888e-06	6.13273e-06	0	0	0	0	0	0	0	0	0	0	Bacteria; Chloroflexi; SAR202 clade; uncultured bacterium; uncultured bacterium; uncultured bacterium; uncultured bacterium
[truncated: 57,907 more rows]

## Sheet: Arc open ocean vs chimneys
Supplementary Table S4: exclusive bacterial and archaeal OTUs present in open ocean versus all chimneys samples.
[truncated: 51,638 more rows]
