# Supplementary material for: Hydrothermal chimneys host habitat-specific microbial communities: analogues for studying the possible impact of mining seafloor massive sulfide deposits
Source: Sci Rep. 2018 Jul 10;8:10386. doi: 10.1038/s41598-018-28613-5 (PMC6039533; doi:10.1038/s41598-018-28613-5)
Supplement: Supplementary file 5 — Supplementary Table S5: significant differences between counts in distinct bacterial and archaeal groups found in relation to habitat types. [file 41598_2018_28613_MOESM5_ESM.xlsx]

## Sheet: Bac chimney activity
Supplementary Table S5: significant differences between counts in distinct bacterial and archaeal groups found in relation to habitat types.
						active chimneys			inactive chimneys
Test	Variable	#OTU ID	Test-Statistic	FDR_P	n_sites	S5	S6	S8	S7	S1	S2	S4	taxonomy
g_test	chimney_activity	FJ820437.1.1482	118484	0	6	0.025412	0.473491	0.000157601	0.00813324	9.40108e-05	0	8.05075e-05	Bacteria; Proteobacteria; Epsilonproteobacteria;Campylobacterales; Helicobacteraceae;Sulfurimonas; uncultured bacterium
g_test	chimney_activity	AB858534.1.1408	74440.2	0	4	0	0	0	0.00012234	0.000453464	0.393849	0.000788974	Bacteria;Proteobacteria;Deltaproteobacteria;Desulfobacterales;Desulfobulbaceae;Desulfobulbus;uncultured bacterium
g_test	chimney_activity	GQ867408.1.1451	67306.6	0	7	3.04312e-05	3.25514e-05	0.00261877	4.70537e-06	0.000116131	0.379116	0.00053135	Bacteria;Proteobacteria;Gammaproteobacteria;Enterobacteriales;Enterobacteriaceae;Escherichia-Shigella
g_test	chimney_activity	AY531584.1.1473	60319.9	0	5	0.000197803	4.52102e-05	0.282332	8.46967e-05	0	5.50981e-06	0	Bacteria;Proteobacteria;Epsilonproteobacteria;Nautiliales;Nautiliaceae;Nitratifractor;uncultured bacterium
g_test	chimney_activity	JQ712402.1.1377	48956	0	7	0.173901	0.0226395	0.00674014	0.000178804	0.000110601	1.10196e-05	4.83045e-05	Bacteria;Proteobacteria;Epsilonproteobacteria;Campylobacterales;Helicobacteraceae;Sulfurovum;uncultured bacterium
g_test	chimney_activity	AY251057.1.1427	21152	0	6	0.0360667	0.0441596	0.00537786	1.17634e-05	5.53005e-06	3.67321e-06	0	Bacteria;Proteobacteria;Epsilonproteobacteria;Nautiliales;Nautiliaceae;uncultured
g_test	chimney_activity	New.ReferenceOTU1843	19310.8	0	6	2.47254e-05	1.08505e-05	0.0918792	0.000211742	3.31803e-05	5.50981e-06	0	Bacteria;Proteobacteria;Deltaproteobacteria;Desulfobacterales;Desulfobulbaceae;Desulfobulbus
g_test	chimney_activity	AY225615.1.1425	17243.1	0	7	0.0338015	0.0382858	2.15892e-05	0.000519944	9.03241e-05	1.8366e-06	1.61015e-05	Bacteria;Proteobacteria;Epsilonproteobacteria;Campylobacterales;Helicobacteraceae;Sulfurimonas;uncultured bacterium
g_test	chimney_activity	EU574671.1.1438	17205.7	0	6	0.00548142	0.0712278	6.26086e-05	0.00243738	0.000114288	0	3.2203e-05	Bacteria;Proteobacteria;Epsilonproteobacteria;Campylobacterales;Helicobacteraceae;Sulfurimonas
g_test	chimney_activity	AY531587.1.1446	15196.7	0	6	0.0272131	0.00260954	0.0990274	0.0164853	0.0077734	4.40785e-05	0	Bacteria;Proteobacteria;Epsilonproteobacteria;Campylobacterales;Helicobacteraceae;Sulfurovum;uncultured bacterium
g_test	chimney_activity	AY251062.1.1454	14504.3	0	6	0.00704102	0.00105973	0.0595408	4.23484e-05	8.11073e-05	5.50981e-06	0	Bacteria;Proteobacteria;Epsilonproteobacteria;Nautiliales;Nautiliaceae;Nitratifractor;uncultured bacterium
g_test	chimney_activity	New.ReferenceOTU2026	12582.2	0	5	7.6078e-06	9.04205e-06	0.0012349	0.0963919	0.000234105	0	0	Bacteria;Proteobacteria;Gammaproteobacteria;Methylococcales;Marine Methylotrophic Group 2;uncultured gamma proteobacterium;uncultured gamma proteobacterium
g_test	chimney_activity	FN562914.1.1348	12364	0	6	0.000368978	3.61682e-06	0	0.00212918	0.0575291	0.00408645	0.0536019	Bacteria;Bacteroidetes;Cytophagia;Cytophagales;Flammeovirgaceae;uncultured;uncultured bacterium
g_test	chimney_activity	New.ReferenceOTU9	11540	0	5	0.000401312	0.0448594	5.1814e-05	4.70537e-06	9.21674e-06	0	0	Bacteria;Proteobacteria;Epsilonproteobacteria;Nautiliales;Nautiliaceae;uncultured
g_test	chimney_activity	DQ228627.1.1360	10857.5	0	4	0.00959534	0.0274734	0.00721726	2.11742e-05	0	0	0	Archaea;Euryarchaeota;Archaeoglobi;Archaeoglobales;Archaeoglobaceae;uncultured;uncultured archaeon
g_test	chimney_activity	AY327884.1.1457	9976.19	0	7	1.90195e-05	3.61682e-06	0.000751303	0.0685549	0.00510239	1.8366e-06	4.83045e-05	Bacteria;Bacteroidetes;Flavobacteriia;Flavobacteriales;Flavobacteriaceae;Lutibacter;uncultured bacterium
g_test	chimney_activity	FJ497620.1.1420	9880.93	0	5	0.0182777	0.0269996	1.51124e-05	0.000232916	0.00111338	0	0	Bacteria;Proteobacteria;Epsilonproteobacteria;Campylobacterales;Campylobacteraceae;Sulfurospirillum;uncultured bacterium
g_test	chimney_activity	EF444735.1.1240	8569.06	0	5	0.0351842	0.000160948	1.07946e-05	9.41075e-06	1.84335e-06	0	0	Bacteria;Proteobacteria;Epsilonproteobacteria;Campylobacterales;Helicobacteraceae;Sulfurimonas;uncultured bacterium
g_test	chimney_activity	AB100010.1.1315	8485.28	0	5	9.12936e-05	0	0	0.000101166	0.0393223	0.00677156	4.83045e-05	Bacteria;Bacteroidetes;VC2,1 Bac22;uncultured alpha proteobacterium;uncultured alpha proteobacterium;uncultured alpha proteobacterium;uncultured alpha proteobacterium
g_test	chimney_activity	FJ905684.1.1378	8463.27	0	7	0.00127431	0.00059135	0.000680059	0.0612663	0.0120629	3.67321e-05	0.000692365	Bacteria;Proteobacteria;Epsilonproteobacteria;Campylobacterales;Helicobacteraceae;Sulfurovum;uncultured bacterium
g_test	chimney_activity	AY531572.1.1473	8394.71	0	6	0.0477789	0.00598222	0.00199916	0.00793091	0.000923518	9.18302e-06	0	Bacteria;Proteobacteria;Epsilonproteobacteria;Campylobacterales;Helicobacteraceae;Sulfurovum;uncultured bacterium
g_test	chimney_activity	GQ349546.1.1352	7892.71	0	7	0.00993008	0.0261406	8.63567e-06	0.000985776	0.000248852	1.8366e-06	0.000434741	Bacteria;Proteobacteria;Epsilonproteobacteria;Campylobacterales;Helicobacteraceae;Sulfurimonas;uncultured epsilon proteobacterium
g_test	chimney_activity	New.ReferenceOTU1163	7883.28	0	5	0.0316884	0.000672728	0.000144648	7.05806e-06	0	1.8366e-06	0	Bacteria;Proteobacteria;Epsilonproteobacteria;Nautiliales;Nautiliaceae;Thioreductor
g_test	chimney_activity	New.ReferenceOTU1465	7701.9	0	4	0	0	0	0.0016163	0.0358015	0.00388442	1.61015e-05	Bacteria;Proteobacteria;Gammaproteobacteria;Xanthomonadales;uncultured
g_test	chimney_activity	New.ReferenceOTU2421	7303.6	0	5	7.6078e-06	1.80841e-06	0.035566	0.000207036	4.2397e-05	0	0	Bacteria;Aquificae;Aquificae;Aquificales;Desulfurobacteriaceae;Desulfurobacterium
g_test	chimney_activity	New.ReferenceOTU79	6981.38	0	4	0	0	0	5.64645e-05	0.0366255	0.000462824	1.61015e-05	Bacteria;Proteobacteria;Gammaproteobacteria;Thiotrichales;Piscirickettsiaceae;endosymbionts;uncultured bacterium
g_test	chimney_activity	CP002683.864391.865952	6962.14	0	5	9.50975e-06	7.23364e-06	0.0331739	7.76387e-05	2.02768e-05	0	0	Bacteria;Thermodesulfobacteria;Thermodesulfobacteria;Thermodesulfobacteriales;Thermodesulfobacteriaceae;Thermodesulfatator
g_test	chimney_activity	New.ReferenceOTU2516	6715.9	0	7	0.000412723	5.42523e-06	0.000265547	0.0255972	0.0195008	0.001214	0.000466944	Bacteria;Bacteroidetes;Flavobacteriia;Flavobacteriales;Flavobacteriaceae;Lutibacter;uncultured bacterium
g_test	chimney_activity	AB095118.1.1050	6536.32	0	4	1.90195e-06	0.000231476	0.0304774	2.82322e-05	0	0	0	Archaea;Euryarchaeota;Methanococci;Methanococcales;Methanocaldococcaceae;Methanocaldococcus
g_test	chimney_activity	AB842295.1.1433	6218.58	0	6	0.019651	0.0148	0.000103628	0.00315495	0.000291249	9.18302e-06	0	Bacteria;Proteobacteria;Epsilonproteobacteria;Campylobacterales;Helicobacteraceae;Sulfurovum;uncultured bacterium
g_test	chimney_activity	New.ReferenceOTU1615	6172.45	0	5	1.14117e-05	1.80841e-06	0.0292555	1.64688e-05	3.6867e-05	0	0	Bacteria;Thermodesulfobacteria;Thermodesulfobacteria;Thermodesulfobacteriales;Thermodesulfobacteriaceae;Thermodesulfatator
g_test	chimney_activity	New.ReferenceOTU633	6036.1	0	4	0.0248889	3.61682e-06	1.07946e-05	7.05806e-06	0	0	0	Bacteria;Caldiserica;Caldisericia;Caldisericales;Caldisericaceae;Caldisericum
g_test	chimney_activity	FR852972.1.1536	5988.69	0	5	7.6078e-06	6.69112e-05	0.0280098	7.05806e-06	0	5.50981e-06	0	Bacteria;Proteobacteria;Deltaproteobacteria;Desulfovibrionales;Desulfohalobiaceae;Desulfothermus
g_test	chimney_activity	FR852970.1.1474	5957.47	0	6	0.016935	0.00754469	4.74962e-05	5.41118e-05	7.37339e-06	1.8366e-06	0	Bacteria;Proteobacteria;Epsilonproteobacteria;Campylobacterales;Helicobacteraceae;Sulfurovum;uncultured bacterium
g_test	chimney_activity	AB476182.1.1462	5882.99	0	7	0.000273881	3.61682e-06	0.000371334	0.0343186	0.0090748	3.67321e-06	1.61015e-05	Bacteria;Proteobacteria;Gammaproteobacteria;Thiotrichales;Thiotrichaceae;uncultured;uncultured bacterium
g_test	chimney_activity	JQ287020.1.1482	5834.61	0	6	3.8039e-06	1.80841e-06	0.000274183	0.0334293	0.00620655	0.000920139	0	Bacteria;Bacteroidetes;Cytophagia;Cytophagales;Flammeovirgaceae;Flexithrix
g_test	chimney_activity	JQ611151.1.1378	5715.48	0	4	1.71176e-05	3.61682e-06	0.0267447	7.05806e-06	0	0	0	Bacteria;Proteobacteria;Epsilonproteobacteria;Nautiliales;Nautiliaceae;Nitratifractor;uncultured bacterium
g_test	chimney_activity	DQ270642.1.1451	5667.12	0	5	5.70585e-06	1.80841e-06	0.000170555	0.0378336	0.0020793	0	0	Bacteria;Proteobacteria;Alphaproteobacteria;SB1-18;uncultured bacterium;uncultured bacterium;uncultured bacterium
g_test	chimney_activity	DQ832646.1.1381	5416.49	0	7	0.00138652	1.26589e-05	0.000213733	0.0189462	0.0186086	0.00386054	0.0100312	Bacteria;Proteobacteria;Alphaproteobacteria;Rhodobacterales;Rhodobacteraceae;uncultured;uncultured bacterium
g_test	chimney_activity	AB476216.1.1305	5382.63	0	4	0	0	0	0.00152219	0.0238198	0.00337568	0.00202879	Bacteria;Proteobacteria;Alphaproteobacteria;Rhizobiales;Phyllobacteriaceae
g_test	chimney_activity	JQ287449.1.1504	5249.45	0	7	0.0558736	0.00882866	0.000781528	0.06492	0.130201	0.00526555	4.83045e-05	Bacteria;Proteobacteria;Gammaproteobacteria;Thiotrichales;Piscirickettsiaceae;Thiomicrospira;uncultured gamma proteobacterium
g_test	chimney_activity	HM557570.1.1378	5209.23	0	6	3.8039e-06	1.80841e-06	0.0002785	0	1.10601e-05	0.0298448	8.05075e-05	Bacteria;Proteobacteria;Gammaproteobacteria;Xanthomonadales;Xanthomonadaceae;Stenotrophomonas
g_test	chimney_activity	JQ287080.1.1521	5203.33	0	4	0.000117921	0	0	0.000185862	0.0250695	0.00367137	0	Bacteria;Proteobacteria;Deltaproteobacteria;Desulfobacterales;Desulfobulbaceae;Desulfobulbus;uncultured bacterium
g_test	chimney_activity	New.ReferenceOTU1473	5075.22	0	4	0	0	0	7.76387e-05	0.0236354	0.00328752	1.61015e-05	Bacteria;Proteobacteria;Gammaproteobacteria;Xanthomonadales;JTB255 marine benthic group
g_test	chimney_activity	FN562856.1.1370	5055.96	0	7	0.0319376	0.0332567	0.0242706	0.0454704	0.00424708	1.8366e-05	8.05075e-05	Bacteria;Proteobacteria;Epsilonproteobacteria;Campylobacterales;Helicobacteraceae;Sulfurovum;uncultured epsilon proteobacterium
g_test	chimney_activity	JQ712373.1.1376	4976.01	0	7	5.70585e-06	3.61682e-06	0.000371334	0.0359138	0.000975131	1.8366e-06	0.00169066	Bacteria;Proteobacteria;Epsilonproteobacteria;Campylobacterales;Helicobacteraceae;Sulfurimonas;uncultured bacterium
g_test	chimney_activity	JQ287102.1.1446	4836.64	0	5	1.90195e-06	0	0	0.000585819	0.0250677	1.10196e-05	0.00196438	Bacteria;Proteobacteria;Alphaproteobacteria;Rhizobiales;Hyphomicrobiaceae;uncultured;uncultured bacterium
g_test	chimney_activity	New.CleanUp.ReferenceOTU506940	4772.54	0	4	0	0	2.15892e-06	0.00124928	0.0182307	0.00618936	0	Bacteria;Proteobacteria;Gammaproteobacteria;Thiotrichales;Piscirickettsiaceae;endosymbionts;uncultured bacterium
g_test	chimney_activity	New.ReferenceOTU1674	4707.23	0	5	1.90195e-06	1.80841e-06	0.0226384	0.000105871	0	1.8366e-06	0	Bacteria;Aquificae;Aquificae;Aquificales;Desulfurobacteriaceae;Desulfurobacterium
g_test	chimney_activity	New.ReferenceOTU2391	4573.99	0	5	0.018797	9.40373e-05	0.000172713	7.05806e-06	2.21202e-05	0	0	Bacteria;Proteobacteria;Deltaproteobacteria;Desulfurellales;Desulfurellaceae;Hippea
g_test	chimney_activity	New.ReferenceOTU1895	4466.03	0	4	0.0183881	8.13784e-05	1.07946e-05	1.41161e-05	0	0	0	Bacteria;Proteobacteria;Epsilonproteobacteria;Campylobacterales;Helicobacteraceae;Sulfurimonas;uncultured bacterium
g_test	chimney_activity	AB057722.1.1392	4422.61	0	4	5.70585e-06	0	0.0208336	1.64688e-05	5.53005e-06	0	0	Archaea;Euryarchaeota;Methanococci;Methanococcales;Methanococcaceae;uncultured
g_test	chimney_activity	New.ReferenceOTU1168	4403.25	0	5	1.14117e-05	1.80841e-06	0.000606656	0.0277099	0.00577521	0	0	Bacteria;Bacteroidetes;Flavobacteriia;Flavobacteriales;Flavobacteriaceae
g_test	chimney_activity	New.ReferenceOTU2480	4213.48	0	7	0.00247063	0.000247752	0.000205097	0.0178687	0.0227101	1.8366e-06	1.61015e-05	Bacteria;Proteobacteria;Epsilonproteobacteria;Campylobacterales;Helicobacteraceae;Sulfurimonas;uncultured bacterium
g_test	chimney_activity	AB842284.1.1464	4183.29	0	6	1.90195e-06	1.80841e-06	0	0.00100224	0.0212557	0.000112033	0.00141693	Bacteria;Proteobacteria;Gammaproteobacteria;Order Incertae Sedis;Family Incertae Sedis;Marinicella;uncultured bacterium
g_test	chimney_activity	JQ287480.1.1461	4144.67	0	4	0	0	0	3.29376e-05	0.00907112	9.18302e-06	0.113049	Bacteria;Proteobacteria;Alphaproteobacteria;SB1-18;uncultured bacterium;uncultured bacterium;uncultured bacterium
g_test	chimney_activity	JN662285.1.1386	4115.37	0	6	0.0157386	0.00113026	0.000507346	4.94064e-05	2.21202e-05	1.8366e-06	0	Bacteria;Proteobacteria;Epsilonproteobacteria;Campylobacterales;Helicobacteraceae;Sulfurovum
g_test	chimney_activity	JQ287054.1.1513	4079.01	0	5	0	3.61682e-06	0	9.88128e-05	0.0216243	5.69347e-05	1.61015e-05	Bacteria;Proteobacteria;Gammaproteobacteria
g_test	chimney_activity	New.ReferenceOTU190	3776.47	0	5	0	0	1.94303e-05	0.00118811	7.18906e-05	0.0192274	0.000144914	Bacteria;Proteobacteria;Deltaproteobacteria;Desulfobacterales;Desulfobulbaceae;Desulfobulbus;uncultured bacterium
g_test	chimney_activity	FN562844.1.1365	3771.72	0	7	0.0215472	0.00649581	0.000610974	0.00408191	0.00180832	4.22419e-05	8.05075e-05	Bacteria;Proteobacteria;Epsilonproteobacteria;Campylobacterales;Helicobacteraceae;Sulfurovum;uncultured epsilon proteobacterium
g_test	chimney_activity	FR853025.1.1494	3619.66	0	5	0.00800721	0.000256794	0.00759507	7.05806e-06	1.84335e-06	0	0	Bacteria;Deinococcus-Thermus;Deinococci;Thermales;Thermaceae;Oceanithermus;uncultured bacterium
g_test	chimney_activity	AY280410.1.1408	3602.08	0	5	0.011988	0.00278676	6.47675e-06	9.41075e-06	3.6867e-06	0	0	Bacteria;Proteobacteria;Epsilonproteobacteria;Campylobacterales;Campylobacteraceae;Thiofractor;uncultured bacterium
g_test	chimney_activity	JN662209.1.1349	3576.2	0	7	0.0040968	0.0276144	1.29535e-05	0.00971189	0.000224889	5.50981e-06	0.000837278	Bacteria;Proteobacteria;Epsilonproteobacteria;Campylobacterales;Helicobacteraceae;Sulfurimonas;uncultured bacterium
g_test	chimney_activity	New.ReferenceOTU2439	3508.6	0	5	0.00833054	8.68037e-05	0.00712875	3.7643e-05	5.53005e-06	0	0	Bacteria;Bacteroidetes;Flavobacteriia;Flavobacteriales;R103-B20;uncultured bacterium;uncultured bacterium
g_test	chimney_activity	AF332514.1.1497	3355.15	0	4	9.50975e-06	0.00878164	0.00535196	2.35269e-05	0	0	0	Bacteria;Thermodesulfobacteria;Thermodesulfobacteria;Thermodesulfobacteriales;Thermodesulfobacteriaceae;Caldimicrobium
g_test	chimney_activity	New.ReferenceOTU1053	3346.61	0	5	0	3.61682e-06	0	0.000256443	0.0134601	0.00367505	0.00449232	Bacteria;Proteobacteria;Gammaproteobacteria;Chromatiales;Ectothiorhodospiraceae;Acidiferrobacter;uncultured bacterium
g_test	chimney_activity	New.ReferenceOTU883	3319.39	0	5	0.0137074	3.61682e-06	6.47675e-06	4.70537e-06	0	1.8366e-06	0	Bacteria;Proteobacteria;Epsilonproteobacteria;Nautiliales;Nautiliaceae;Caminibacter
g_test	chimney_activity	KC294233.1.1370	3235.05	0	4	0	0	2.15892e-06	0	7.37339e-06	0.0171667	4.83045e-05	Bacteria;Actinobacteria;Actinobacteria;Micrococcales;Micrococcaceae;Kocuria
g_test	chimney_activity	FJ497650.1.1461	3161.79	0	4	0	0	0	1.88215e-05	0.000383416	3.30589e-05	0.143158	Bacteria;Proteobacteria;Gammaproteobacteria;Thiotrichales;Thiotrichaceae;uncultured;uncultured sediment bacterium
g_test	chimney_activity	New.ReferenceOTU2022	3111	0	5	1.90195e-06	1.80841e-06	8.85156e-05	0.021193	0.00077052	0	0	Bacteria;Actinobacteria;Acidimicrobiia;Acidimicrobiales;uncultured;uncultured bacterium;uncultured bacterium
g_test	chimney_activity	AY531562.1.1495	3038.18	0	4	0.0124825	0.000162757	0	2.35269e-06	1.65901e-05	0	0	Bacteria;Bacteroidetes;Flavobacteriia;Flavobacteriales;R103-B20;uncultured bacterium;uncultured bacterium
g_test	chimney_activity	New.ReferenceOTU677	2941.41	0	5	0.00987112	0.00217913	6.04497e-05	7.05806e-06	0	7.34642e-06	0	Bacteria;Proteobacteria;Epsilonproteobacteria;Nautiliales;Nautiliaceae;Thioreductor
g_test	chimney_activity	DQ456289.1.1457	2919.65	0	6	1.90195e-06	3.61682e-06	0.000142489	0	1.47468e-05	0.016647	8.05075e-05	Bacteria;Proteobacteria;Gammaproteobacteria;Enterobacteriales;Enterobacteriaceae;Enterobacter;uncultured bacterium
g_test	chimney_activity	JN662083.1.1394	2902.08	0	4	1.90195e-06	0	0.00019862	0.0210824	0.000444247	0	0	Bacteria;Proteobacteria;Gammaproteobacteria;Methylococcales;Marine Methylotrophic Group 2
g_test	chimney_activity	New.ReferenceOTU1263	2853.82	0	4	0.0113451	0.000164565	0.00031952	0	5.53005e-06	0	0	Bacteria;Proteobacteria;Epsilonproteobacteria;Nautiliales;Nautiliaceae;Nitratifractor;uncultured bacterium
g_test	chimney_activity	New.ReferenceOTU2465	2825	0	4	0.0116418	3.61682e-06	4.31784e-06	2.35269e-06	0	0	0	Bacteria;Proteobacteria;Epsilonproteobacteria;Campylobacterales;Helicobacteraceae;Sulfurimonas;uncultured bacterium
g_test	chimney_activity	New.ReferenceOTU1045	2777.51	0	5	5.32546e-05	0	0	0.00112458	0.0138528	1.8366e-06	0.0053135	Bacteria;Bacteroidetes;Flavobacteriia;Flavobacteriales;Flavobacteriaceae;uncultured;uncultured Bacteroidetes bacterium
g_test	chimney_activity	New.ReferenceOTU2137	2763.76	0	4	0.0106072	0.000698046	8.20389e-05	4.70537e-06	0	0	0	Unassigned
g_test	chimney_activity	AB476180.1.1417	2751.46	0	5	3.8039e-06	0	0	0.000265854	0.0101974	1.8366e-06	0.0374682	Bacteria;Proteobacteria;Alphaproteobacteria;OCS116 clade;uncultured bacterium;uncultured bacterium;uncultured bacterium
g_test	chimney_activity	New.ReferenceOTU1032	2727.76	0	5	0	0	0.000138171	0.000766976	0.0135652	1.8366e-06	0.0127363	Bacteria;Bacteroidetes;Flavobacteriia;Flavobacteriales;Flavobacteriaceae
g_test	chimney_activity	New.ReferenceOTU1912	2639.22	0	7	1.14117e-05	9.04205e-06	2.15892e-06	0.00331494	0.0115449	7.34642e-06	0.00146524	Bacteria;Proteobacteria;Alphaproteobacteria;Rhodobacterales;Rhodobacteraceae
g_test	chimney_activity	JN662233.1.1483	2577.47	0	6	0.000119823	0	2.37481e-05	0.000717569	0.00207192	5.50981e-06	0.107542	Bacteria;Bacteroidetes;Flavobacteriia;Flavobacteriales;Flavobacteriaceae;uncultured Bacteroidetes bacterium;uncultured Bacteroidetes bacterium
g_test	chimney_activity	FN562824.1.1388	2541.42	0	4	0	0	0	0.000103518	0.013427	3.67321e-06	8.05075e-05	Bacteria;Proteobacteria;Gammaproteobacteria;Order Incertae Sedis;Family Incertae Sedis;Marinicella;uncultured gamma proteobacterium
g_test	chimney_activity	CP001857.1049930.1051439	2427.5	0	5	1.90195e-06	0.00236359	0.00879759	2.35269e-05	1.65901e-05	0	0	Archaea;Euryarchaeota;Archaeoglobi;Archaeoglobales;Archaeoglobaceae;Archaeoglobus
g_test	chimney_activity	New.ReferenceOTU1008	2419.61	0	5	0.000131235	2.71261e-05	0	0.00281617	0.0120186	1.8366e-06	0	Bacteria;Proteobacteria;Gammaproteobacteria;Order Incertae Sedis;Family Incertae Sedis;Marinicella;uncultured bacterium
g_test	chimney_activity	New.ReferenceOTU544	2393.46	0	4	0.000523036	0.00958276	2.15892e-06	0.000174099	0	0	0	Bacteria;Proteobacteria;Epsilonproteobacteria;Campylobacterales;Helicobacteraceae;Sulfurimonas;uncultured bacterium
g_test	chimney_activity	DQ395426.1.1417	2351.5	0	4	0	0	0	0.000112929	0.0123762	1.8366e-06	0.000386436	Bacteria;Proteobacteria;Alphaproteobacteria;Caulobacterales;Hyphomonadaceae;uncultured
g_test	chimney_activity	AY251063.1.1482	2337.29	0	5	0.00910654	0.000311046	0.000287136	2.35269e-06	0	5.50981e-06	0	Bacteria;Proteobacteria;Epsilonproteobacteria;Nautiliales;Nautiliaceae;Nitratifractor;uncultured bacterium
g_test	chimney_activity	FJ640814.1.1486	2321.35	0	4	0	0	0	3.05849e-05	0.00567751	0.00444458	0.0191125	Bacteria;Bacteroidetes;Cytophagia;Cytophagales;Flammeovirgaceae;Reichenbachiella;uncultured Bacteroidetes bacterium
g_test	chimney_activity	FR852993.1.1458	2265.78	0	6	0.00772002	0.00158055	0.000200779	2.58796e-05	3.6867e-06	9.18302e-06	0	Bacteria;Proteobacteria;Epsilonproteobacteria;Campylobacterales;Helicobacteraceae;Sulfurovum
g_test	chimney_activity	New.ReferenceOTU1489	2247.49	0	4	0.00898101	0.000269453	8.63567e-06	0	1.84335e-06	0	0	Bacteria;Proteobacteria;Epsilonproteobacteria;Nautiliales;Nautiliaceae;Nitratifractor
g_test	chimney_activity	New.ReferenceOTU1138	2238.75	0	5	0	0	7.55621e-05	0.00128457	0.00963334	0.00191558	4.83045e-05	Bacteria;Proteobacteria;Gammaproteobacteria;Chromatiales;Ectothiorhodospiraceae;Acidiferrobacter;uncultured bacterium
g_test	chimney_activity	AF449223.1.1378	2229.61	0	5	6.08624e-05	3.61682e-06	0	0.0141938	0.00137698	0	4.83045e-05	Bacteria;Proteobacteria;Alphaproteobacteria;Rhodobacterales;Rhodobacteraceae;Roseobacter clade NAC11-7 lineage;uncultured alpha proteobacterium
g_test	chimney_activity	New.ReferenceOTU1525	2228.02	0	5	0	0	3.88605e-05	0.00172687	0.00869876	0.00217087	1.61015e-05	Bacteria;Bacteroidetes;Cytophagia;Cytophagales;Flammeovirgaceae
g_test	chimney_activity	JQ287017.1.1510	2159.15	0	4	0	0	0	0.000559939	0.00682039	1.8366e-06	0.0369207	Bacteria;Verrucomicrobia;Verrucomicrobiae;Verrucomicrobiales;DEV007;uncultured bacterium;uncultured bacterium
g_test	chimney_activity	New.ReferenceOTU672	2098.14	0	4	1.90195e-06	1.80841e-06	0.00987273	9.41075e-06	0	0	0	Bacteria;Thermodesulfobacteria;Thermodesulfobacteria;Thermodesulfobacteriales;Thermodesulfobacteriaceae;uncultured Thermodesulfobacteriaceae bacterium;uncultured Thermodesulfobacteriaceae bacterium
g_test	chimney_activity	New.ReferenceOTU1253	2071.34	0	5	3.8039e-06	3.0743e-05	0.00972593	9.41075e-06	0	1.8366e-06	0	Bacteria;Proteobacteria;Deltaproteobacteria;Desulfovibrionales;Desulfohalobiaceae;Desulfothermus
g_test	chimney_activity	AB476212.1.1464	2061.42	0	4	0	0	0	8.46967e-05	0.00362218	9.18302e-06	0.0635043	Bacteria;Planctomycetes;Planctomycetacia;Planctomycetales;Planctomycetaceae;Bythopirellula;uncultured bacterium
g_test	chimney_activity	EU491713.1.1444	2044.44	0	4	0	0	0	3.05849e-05	0.00999464	0.000830145	0.000225421	Bacteria;Bacteroidetes;Flavobacteriia;Flavobacteriales;Flavobacteriaceae;Maritimimonas
g_test	chimney_activity	New.ReferenceOTU1738	1975.92	0	5	0.00630306	0.00126046	0.000630404	2.35269e-06	0	3.67321e-06	0	Bacteria;Proteobacteria;Epsilonproteobacteria;Nautiliales;Nautiliaceae;Thioreductor
g_test	chimney_activity	FJ792087.1.1341	1951.8	0	4	0.00417098	0.00405626	0	7.05806e-05	1.10601e-05	0	0	Bacteria;BD1-5;uncultured bacterium;uncultured bacterium;uncultured bacterium;uncultured bacterium;uncultured bacterium
g_test	chimney_activity	JX527407.1.1423	1930.62	0	6	1.90195e-06	1.80841e-06	0.00019862	0.0140385	0.000683882	0	1.61015e-05	Bacteria;Bacteroidetes;Flavobacteriia;Flavobacteriales;Flavobacteriaceae;uncultured
g_test	chimney_activity	JQ287290.1.1486	1910.83	0	6	3.8039e-06	1.80841e-06	0	0.000291733	0.00532359	3.67321e-06	0.0409783	Bacteria;Bacteroidetes;Flavobacteriia;Flavobacteriales;Flavobacteriaceae
g_test	chimney_activity	New.ReferenceOTU1840	1900.02	0	6	1.90195e-06	0	0.000174872	0.00725333	0.00568673	1.8366e-06	1.61015e-05	Bacteria;Proteobacteria;Gammaproteobacteria;Methylococcales
g_test	chimney_activity	New.ReferenceOTU105	1897.96	0	5	3.8039e-06	3.61682e-06	0.00920779	5.88172e-05	1.84335e-06	0	0	Bacteria;Proteobacteria;Epsilonproteobacteria;Campylobacterales;Helicobacteraceae;Sulfurovum;uncultured bacterium
g_test	chimney_activity	New.ReferenceOTU979	1891.87	0	5	3.8039e-06	0	8.20389e-05	0.00523943	0.00666739	0	3.2203e-05	Bacteria;Proteobacteria;Gammaproteobacteria;Thiotrichales;Piscirickettsiaceae;Marine Methylotrophic Group 3;uncultured gamma proteobacterium
g_test	chimney_activity	New.ReferenceOTU1543	1853.48	0	4	0	0	0	2.35269e-05	0.00983979	1.8366e-06	1.61015e-05	Bacteria;Proteobacteria;Gammaproteobacteria;Methylococcales;Marine Methylotrophic Group 2
g_test	chimney_activity	KC682834.1.1417	1833.23	0	4	0	0	4.31784e-06	0.00110106	0.00869876	0	0.0021737	Bacteria;Proteobacteria;Alphaproteobacteria;Caulobacterales;Hyphomonadaceae;Robiginitomaculum;uncultured bacterium
g_test	chimney_activity	New.ReferenceOTU1938	1806.34	0	5	1.90195e-06	3.61682e-06	0.00874578	4.23484e-05	9.21674e-06	0	0	Bacteria;Aquificae;Aquificae;Aquificales;Desulfurobacteriaceae;Desulfurobacterium
g_test	chimney_activity	AY263403.1.1472	1802.1	0	5	0.0027274	0.00202361	0.00330746	7.05806e-05	0	1.8366e-06	0	Bacteria;Aquificae;Aquificae;Aquificales;Desulfurobacteriaceae;Thermovibrio
g_test	chimney_activity	JF320726.1.1466	1748.39	0	5	3.8039e-06	0	0	0.000715217	0.00811811	1.8366e-06	0.00592535	Bacteria;Proteobacteria;Gammaproteobacteria;Order Incertae Sedis;Family Incertae Sedis;Marinicella;uncultured bacterium
g_test	chimney_activity	New.ReferenceOTU1185	1737.65	0	4	3.8039e-06	0	0	0.000291733	0.00518534	0.0038734	0	Bacteria;Bacteroidetes;BD2-2;uncultured bacterium;uncultured bacterium;uncultured bacterium;uncultured bacterium
g_test	chimney_activity	New.ReferenceOTU1662	1727.01	0	4	1.90195e-06	1.80841e-06	0.00829456	3.7643e-05	0	0	0	Unassigned
g_test	chimney_activity	AB293244.1.1335	1707.66	0	4	0	0.00205074	0.00558728	4.70537e-06	0	1.8366e-06	0	Archaea;Crenarchaeota;Thermoprotei;Thermoproteales;Thermoproteaceae;uncultured;uncultured archaeon
g_test	chimney_activity	JF155704.1.1375	1670.86	0	4	0	0	4.74962e-05	0	5.53005e-06	0.00927485	1.61015e-05	Bacteria;Proteobacteria;Gammaproteobacteria;Pseudomonadales;Moraxellaceae;Enhydrobacter
g_test	chimney_activity	CP002205.2120484.2121990	1647.89	0	6	0.00220816	0.00463315	2.15892e-06	2.82322e-05	1.10601e-05	0	0.000128812	Bacteria;Proteobacteria;Epsilonproteobacteria;Campylobacterales;Helicobacteraceae;Sulfurimonas
g_test	chimney_activity	New.ReferenceOTU2432	1647.38	0	4	9.50975e-06	0.000457528	0.00718056	0	3.6867e-06	0	0	Bacteria;Proteobacteria;Epsilonproteobacteria;Nautiliales;Nautiliaceae;Nautilia
g_test	chimney_activity	KC682271.1.1447	1622.47	0	5	0.000121725	1.80841e-06	0.000105787	0.0093284	0.00290696	0	0	Bacteria;Proteobacteria;Alphaproteobacteria;Rhodobacterales;Rhodobacteraceae;Roseobacter clade NAC11-7 lineage;uncultured alpha proteobacterium
g_test	chimney_activity	GU220765.1.1464	1619.78	0	5	0	1.80841e-06	0	4.70537e-05	0.00165348	5.50981e-06	0.0607349	Bacteria;Proteobacteria;Alphaproteobacteria;OCS116 clade;uncultured bacterium;uncultured bacterium;uncultured bacterium
g_test	chimney_activity	New.ReferenceOTU911	1589.08	0	5	0.006925	9.04205e-06	4.31784e-06	2.35269e-06	6.63605e-05	0	0	Bacteria;Proteobacteria;Deltaproteobacteria;Desulfobacterales;Desulfobulbaceae;Desulfobulbus;uncultured delta proteobacterium
g_test	chimney_activity	AB440165.1.1431	1542.51	0	6	0.000102705	2.89346e-05	4.31784e-06	0.00663458	0.00405168	0	0.000434741	Bacteria;Proteobacteria;Epsilonproteobacteria;Campylobacterales;Helicobacteraceae;Sulfurovum;uncultured bacterium
g_test	chimney_activity	JF214014.1.1341	1509.14	0	4	0	0	9.71513e-05	0	3.6867e-06	0.0087404	1.61015e-05	Bacteria;Actinobacteria;Actinobacteria;Propionibacteriales;Propionibacteriaceae;Propionibacterium;uncultured bacterium
g_test	chimney_activity	JF076235.1.1372	1501.4	0	5	7.6078e-06	0	0.000146806	0	3.6867e-06	0.00903426	3.2203e-05	Bacteria;Firmicutes;Bacilli;Bacillales;Staphylococcaceae;Staphylococcus
g_test	chimney_activity	New.ReferenceOTU37	1499.29	0	6	5.70585e-06	0	0.000155442	0.0114764	9.95408e-05	1.8366e-06	4.83045e-05	Bacteria;Proteobacteria;Gammaproteobacteria;Thiotrichales;Thiotrichaceae;uncultured;uncultured bacterium
g_test	chimney_activity	GQ452887.1.1498	1495.07	0	5	0	1.80841e-06	0	0.000336434	0.00393924	0.00354832	0.00193218	Bacteria;Verrucomicrobia;Verrucomicrobiae;Verrucomicrobiales;DEV007;uncultured bacterium;uncultured bacterium
g_test	chimney_activity	New.ReferenceOTU2365	1476.92	0	4	1.52156e-05	9.04205e-06	0.00689558	2.35269e-06	0	0	0	Bacteria;Proteobacteria;Epsilonproteobacteria;Nautiliales;Nautiliaceae;Nitratifractor;uncultured bacterium
g_test	chimney_activity	New.ReferenceOTU1287	1460.87	0	5	0.0027312	0.000717939	0.00312611	9.41075e-06	2.76502e-05	0	0	Bacteria;BD1-5
g_test	chimney_activity	FM165250.1.1493	1415.96	0	4	0	0	4.31784e-06	0.000348198	0.00720934	0	0.000933887	Bacteria;Bacteroidetes;Flavobacteriia;Flavobacteriales;Flavobacteriaceae;Lutibacter
g_test	chimney_activity	New.ReferenceOTU2005	1403.97	0	4	0	0	0	0.00942957	5.53005e-05	1.8366e-06	0.000225421	Bacteria;Bacteroidetes;Flavobacteriia;Flavobacteriales;Flavobacteriaceae;Tenacibaculum
g_test	chimney_activity	New.ReferenceOTU2002	1387.33	0	4	0	0	0	0.000223505	0.00616416	0.00103585	3.2203e-05	Bacteria;Proteobacteria;Gammaproteobacteria;Order Incertae Sedis;Family Incertae Sedis;Marinicella;uncultured bacterium
g_test	chimney_activity	AY251060.1.1475	1366.87	0	5	0.00295373	0.0016764	0.00123058	2.82322e-05	3.6867e-06	0	0	Bacteria;Proteobacteria;Epsilonproteobacteria;Campylobacterales;Campylobacteraceae;Thiofractor;uncultured bacterium
g_test	chimney_activity	AB238959.1.1410	1354.69	0	4	0	0	4.10194e-05	0.00171981	0.00622314	1.8366e-06	0	Bacteria;Proteobacteria;Gammaproteobacteria;BD7-8 marine group
g_test	chimney_activity	FN554145.1.1470	1283.92	0	6	0.00591697	3.9785e-05	0.000114423	0.000176451	2.58069e-05	1.8366e-06	0	Bacteria;Proteobacteria;Epsilonproteobacteria;Campylobacterales;Helicobacteraceae;Sulfurovum
g_test	chimney_activity	HQ153930.1.1376	1250.81	0	4	1.90195e-06	0	2.15892e-06	0.00682985	0.00135855	0	0	Bacteria;Proteobacteria;Alphaproteobacteria;Rhizobiales
g_test	chimney_activity	GQ433956.1.1444	1223.47	0	5	0.00581046	3.61682e-06	2.15892e-06	9.41075e-06	0.000162215	0	0	Bacteria;Bacteroidetes;VC2,1 Bac22;uncultured bacterium;uncultured bacterium;uncultured bacterium;uncultured bacterium
g_test	chimney_activity	FJ937713.1.1224	1213.81	0	5	1.90195e-06	0	0.000123058	0.007091	0.00177699	0	1.61015e-05	Bacteria;Proteobacteria;Gammaproteobacteria;Methylococcales;Marine Methylotrophic Group 2;uncultured bacterium;uncultured bacterium
g_test	chimney_activity	New.ReferenceOTU1347	1182.68	0	4	0.00266653	0.00125684	0.00102117	2.35269e-06	0	0	0	Bacteria;Caldiserica;Caldisericia;Caldisericales;Caldisericaceae;Caldisericum
g_test	chimney_activity	GQ903355.1.1494	1166.79	0	4	1.90195e-06	0	9.06746e-05	0.00223976	0.00513926	0	0	Bacteria;Proteobacteria;Gammaproteobacteria;Thiotrichales;Piscirickettsiaceae;endosymbionts;uncultured bacterium
g_test	chimney_activity	HQ153847.1.1358	1154.04	0	5	1.52156e-05	9.04205e-06	0.0054599	9.41075e-06	0	3.67321e-06	0	Bacteria;Proteobacteria;Epsilonproteobacteria;Campylobacterales;Helicobacteraceae;Sulfurovum;uncultured bacterium
g_test	chimney_activity	New.ReferenceOTU2355	1133.99	0	4	0	0	0	1.41161e-05	0.00204796	0.00395237	8.05075e-05	Bacteria;Bacteroidetes;Sphingobacteriia;Sphingobacteriales;Saprospiraceae;Lewinella;uncultured bacterium
g_test	chimney_activity	FJ192817.1.1458	1125.73	0	4	0	0	0.000222369	0	1.84335e-06	0.00730601	3.2203e-05	Bacteria;Proteobacteria;Betaproteobacteria;Burkholderiales;Comamonadaceae;Delftia;Delftia tsuruhatensis
g_test	chimney_activity	New.ReferenceOTU2264	1116.81	0	5	0.00365175	0.000495504	0.000535412	4.70537e-06	0	1.8366e-06	0	Bacteria;Proteobacteria;Epsilonproteobacteria;Nautiliales;Nautiliaceae;Caminibacter
g_test	chimney_activity	HQ757403.1.1452	1107.64	0	5	1.90195e-06	0	1.29535e-05	0	3.6867e-06	0.00602039	1.61015e-05	Bacteria;Proteobacteria;Gammaproteobacteria;Enterobacteriales;Enterobacteriaceae;Enterobacter
g_test	chimney_activity	New.ReferenceOTU1608	1091.01	0	4	0	0	0	3.29376e-05	0.00565171	1.8366e-06	0.001111	Bacteria;Proteobacteria;Alphaproteobacteria;DB1-14;uncultured bacterium;uncultured bacterium;uncultured bacterium
g_test	chimney_activity	New.ReferenceOTU234	1087.72	0	5	3.8039e-06	1.80841e-06	0.00538218	5.41118e-05	3.6867e-06	0	0	Bacteria;Proteobacteria;Epsilonproteobacteria;Campylobacterales;Helicobacteraceae;Sulfurovum;uncultured bacterium
g_test	chimney_activity	New.ReferenceOTU331	1071.72	0	4	3.8039e-06	0	7.988e-05	0.00797796	7.55773e-05	0	0	Bacteria;Bacteroidetes;Flavobacteriia;Flavobacteriales;Flavobacteriaceae;Lutibacter
g_test	chimney_activity	JN662165.1.1232	1053.32	0	5	0.00385525	0.000421359	0.000110105	0	1.84335e-06	5.50981e-06	0	Bacteria;Proteobacteria;Epsilonproteobacteria;Campylobacterales;Helicobacteraceae;Sulfurovum;uncultured epsilon proteobacterium
g_test	chimney_activity	FJ905673.1.1406	1036.7	0	4	0	0	2.15892e-05	0.00339963	0.00198897	0.00106523	0	Bacteria;Proteobacteria;Zetaproteobacteria;Mariprofundales;Mariprofundaceae;Mariprofundus;uncultured bacterium
g_test	chimney_activity	JN874001.1.1481	1021.94	0	5	0.0015577	3.61682e-06	0.00361187	6.11698e-05	6.26739e-05	0	0	Bacteria;Proteobacteria;Epsilonproteobacteria;Campylobacterales;Helicobacteraceae;Sulfurovum;uncultured epsilon proteobacterium
g_test	chimney_activity	EU050874.1.1386	1008.53	0	4	0	0	0	2.35269e-06	0.00102859	1.8366e-06	0.0378707	Bacteria;Planctomycetes;Phycisphaerae;Phycisphaerales;Phycisphaeraceae;Phycisphaera;uncultured bacterium
g_test	chimney_activity	AY280425.1.1435	997.64	0	5	0.00158242	0.000524439	0.00240503	7.05806e-06	1.65901e-05	0	0	Bacteria;BHI80-139
g_test	chimney_activity	New.CleanUp.ReferenceOTU484698	997.091	0	5	0.00218915	0.00241784	2.15892e-06	0.000171746	0	1.8366e-06	0	Bacteria;Proteobacteria;Epsilonproteobacteria;Campylobacterales;Helicobacteraceae;Sulfurimonas;uncultured bacterium
g_test	chimney_activity	JN662174.1.1366	980.406	0	4	6.84702e-05	0	0.00482302	3.29376e-05	2.39635e-05	0	0	Bacteria;Proteobacteria;Epsilonproteobacteria;Campylobacterales;Helicobacteraceae;Sulfurovum;uncultured bacterium
g_test	chimney_activity	JN232988.1.1444	970.407	0	6	2.28234e-05	1.80841e-06	0	0.00162806	0.00311895	0.00100462	0.000112711	Bacteria;Bacteroidetes;Flavobacteriia;Flavobacteriales;Flavobacteriaceae;Polaribacter
g_test	chimney_activity	New.ReferenceOTU1042	960.312	0	4	1.90195e-06	0	8.63567e-06	0.00644166	0.000176961	0	0	Bacteria;Proteobacteria;Deltaproteobacteria;Desulfobacterales;Desulfobulbaceae;MSBL7
g_test	chimney_activity	AJ431251.1.1522	956.819	0	4	0.00336265	8.13784e-05	0.00057859	2.35269e-06	0	0	0	Bacteria;Firmicutes;Clostridia;Thermoanaerobacterales;Thermodesulfobiaceae;Coprothermobacter
g_test	chimney_activity	New.ReferenceOTU1257	956.773	0	5	1.90195e-06	0	0.000196462	0.00631226	0.00132721	9.18302e-06	0	Bacteria;Proteobacteria;Gammaproteobacteria;Methylococcales;IheB2-23;uncultured bacterium;uncultured bacterium
g_test	chimney_activity	EU050875.1.1358	955.504	0	4	0	0	0	0.000425836	0.00425076	1.8366e-06	0.00436351	Bacteria;Planctomycetes;Phycisphaerae;Phycisphaerales;Phycisphaeraceae;SM1A02;uncultured bacterium
g_test	chimney_activity	GU061224.1.1423	952.674	0	6	0.000100803	1.98925e-05	3.23838e-05	0.0036302	0.00327379	0	8.05075e-05	Bacteria;Bacteroidetes;Flavobacteriia;Flavobacteriales;Cryomorphaceae;Fluviicola;uncultured bacterium
g_test	chimney_activity	AB181499.1.1451	951.122	0	6	0.00123437	9.04205e-05	7.988e-05	0.00619933	0.00583973	1.46928e-05	0	Bacteria;Proteobacteria;Epsilonproteobacteria;Campylobacterales;Helicobacteraceae;Sulfurimonas;uncultured bacterium
g_test	chimney_activity	KC682597.1.1256	940.389	0	6	1.52156e-05	7.23364e-06	0	0.000985776	0.00446275	1.8366e-06	1.61015e-05	Bacteria;Proteobacteria;Alphaproteobacteria;Rhodobacterales;Rhodobacteraceae
g_test	chimney_activity	GU940889.1.1356	925.202	0	6	7.6078e-06	9.04205e-06	0.000131694	0	3.6867e-06	0.00584775	6.4406e-05	Bacteria;Proteobacteria;Gammaproteobacteria;Pseudomonadales;Pseudomonadaceae;uncultured;uncultured bacterium
g_test	chimney_activity	New.ReferenceOTU2518	922.161	0	5	1.90195e-06	0	0	4.94064e-05	0.00481114	7.53008e-05	9.6609e-05	Bacteria;Proteobacteria;Gammaproteobacteria;Order Incertae Sedis;Family Incertae Sedis;Marinicella
g_test	chimney_activity	New.ReferenceOTU2098	916.638	0	4	0.00330179	0.00012478	0.000408035	2.35269e-06	0	0	0	Bacteria;Proteobacteria;Epsilonproteobacteria;Nautiliales;Nautiliaceae;Caminibacter;uncultured bacterium
g_test	chimney_activity	DQ146934.1.1433	914.888	0	4	0	1.80841e-06	0	0	3.6867e-06	0.00487068	4.83045e-05	Bacteria;Proteobacteria;Gammaproteobacteria;Vibrionales;Vibrionaceae;Photobacterium;Photobacterium leiognathi
g_test	chimney_activity	DQ270646.1.1488	913.222	0	4	0	0	0	0.000348198	0.00458072	3.67321e-06	3.2203e-05	Bacteria;Proteobacteria;Alphaproteobacteria;Rhizobiales;Phyllobacteriaceae;Pseudahrensia;uncultured bacterium
g_test	chimney_activity	New.ReferenceOTU1380	887.08	0	4	0.0028282	0.000781233	2.37481e-05	2.35269e-06	0	0	0	Bacteria;Proteobacteria;Epsilonproteobacteria;Campylobacterales;Helicobacteraceae;Sulfurovum
g_test	chimney_activity	New.ReferenceOTU2231	839.091	0	5	4.75488e-05	0	2.5907e-05	0.00303967	0.00244981	0.000202027	0	Bacteria;Bacteroidetes;Flavobacteriia;Flavobacteriales;Flavobacteriaceae;uncultured
g_test	chimney_activity	CP001899.1403988.1405498	808.463	0	4	1.90195e-06	0.000745065	0.00292317	0	3.6867e-06	0	0	Archaea;Euryarchaeota;Archaeoglobi;Archaeoglobales;Archaeoglobaceae;Archaeoglobus
g_test	chimney_activity	DQ071079.1.1438	799.837	0	6	0.000941466	0.00750128	0	0.00308908	0.000200925	3.67321e-06	0.000144914	Bacteria;Proteobacteria;Epsilonproteobacteria;Campylobacterales;Helicobacteraceae;Sulfurimonas;uncultured bacterium
g_test	chimney_activity	New.ReferenceOTU1676	788.452	0	5	0.000102705	0	3.45427e-05	0.00242797	0.00297701	0.000238759	0	Bacteria;Bacteroidetes;Flavobacteriia;Flavobacteriales;Flavobacteriaceae;uncultured;uncultured bacterium
g_test	chimney_activity	New.ReferenceOTU1672	749.016	0	4	0	0	2.80659e-05	0.0022727	0.002424	0	0.000193218	Bacteria;Proteobacteria;Alphaproteobacteria;Rhizobiales;Hyphomicrobiaceae;Filomicrobium;uncultured bacterium
g_test	chimney_activity	New.ReferenceOTU128	737.932	0	5	0	1.80841e-06	0	0.000230563	0.0024664	7.34642e-06	0.0113677	Bacteria;Proteobacteria;Gammaproteobacteria;Thiotrichales;Piscirickettsiaceae;uncultured;uncultured bacterium
g_test	chimney_activity	JX310176.1.1425	730.924	0	4	0	0	0	1.17634e-05	2.94936e-05	1.8366e-06	0.033636	Bacteria;Proteobacteria;Alphaproteobacteria;Rhodobacterales;Rhodobacteraceae
g_test	chimney_activity	AB095133.1.1040	722.771	0	4	0	0.00124961	0.00196246	9.41075e-06	0	1.8366e-06	0	Archaea;Euryarchaeota;Halobacteria;Halobacteriales;Miscellaneous Euryarchaeotic Group(MEG);uncultured archaeon;uncultured archaeon
g_test	chimney_activity	JN662115.1.1362	721.405	0	4	1.52156e-05	0	0	0.000159983	0.00387103	0	3.2203e-05	Bacteria;Proteobacteria;Epsilonproteobacteria;Campylobacterales;Helicobacteraceae;Sulfurovum;uncultured bacterium
g_test	chimney_activity	New.CleanUp.ReferenceOTU427269	720.725	0	4	1.90195e-06	0	6.90854e-05	0.0053406	0.000154841	0	0	Bacteria;Bacteroidetes;Flavobacteriia;Flavobacteriales;Flavobacteriaceae;Lutibacter;uncultured bacterium
g_test	chimney_activity	AY268936.1.1506	718.01	0	5	1.90195e-06	9.94625e-05	0.00327076	2.35269e-06	0	1.8366e-06	0	Bacteria;Aquificae;Aquificae;Aquificales;Desulfurobacteriaceae
g_test	chimney_activity	New.ReferenceOTU1933	715.57	0	4	0	0.00199829	0.00107082	7.05806e-06	9.21674e-06	0	0	Bacteria;Aquificae;Aquificae;Aquificales;Desulfurobacteriaceae;Desulfurobacterium
g_test	chimney_activity	New.ReferenceOTU2142	676.961	0	4	0.00261328	0.000179033	4.31784e-06	0	0	1.8366e-06	0	Bacteria;Proteobacteria;Epsilonproteobacteria;Nautiliales;Nautiliaceae;Thioreductor
g_test	chimney_activity	JQ287230.1.1441	671.624	0	4	0	0	3.02249e-05	0.00314554	0.00132537	0	0.000305929	Bacteria;Proteobacteria;Alphaproteobacteria;Caulobacterales;Hyphomonadaceae;Robiginitomaculum;uncultured bacterium
g_test	chimney_activity	FM165252.1.1474	664.729	0	4	0	0	0	1.17634e-05	0.00153551	3.67321e-06	0.0173896	Bacteria;Proteobacteria;Alphaproteobacteria;Rhizobiales;Hyphomicrobiaceae;uncultured;uncultured bacterium
g_test	chimney_activity	HQ588379.1.1373	664.435	0	5	8.17839e-05	5.42523e-06	0.00410842	0.000261148	6.63605e-05	0	0	Bacteria;Proteobacteria;Epsilonproteobacteria;Campylobacterales;Helicobacteraceae;Sulfurovum;uncultured bacterium
g_test	chimney_activity	FR744471.1.1447	662.674	0	5	4.37449e-05	1.80841e-06	0	0.000329376	0.00361849	0	0.000305929	Bacteria;Bacteroidetes;Flavobacteriia;Flavobacteriales;Flavobacteriaceae;uncultured
g_test	chimney_activity	AY370187.1.1454	651.845	0	5	0	5.42523e-06	7.988e-05	0	5.53005e-06	0.00402033	1.61015e-05	Bacteria;Proteobacteria;Alphaproteobacteria;Rhizobiales;Brucellaceae
g_test	chimney_activity	JN662133.1.1359	651.627	0	6	0.00291759	0.000311046	2.5907e-05	0.000119987	4.42404e-05	1.8366e-06	0	Bacteria;Proteobacteria;Epsilonproteobacteria;Campylobacterales;Helicobacteraceae;Sulfurovum;uncultured bacterium
g_test	chimney_activity	FJ628316.1.1523	649.169	0	4	1.33137e-05	0	2.15892e-06	0.00404192	0.00044609	0	0	Bacteria;Proteobacteria;Deltaproteobacteria;Desulfobacterales;Desulfobulbaceae;Desulfocapsa;uncultured delta proteobacterium
g_test	chimney_activity	AB476274.1.1400	649.019	0	4	0	0	0.000168396	0.00515003	0.000376043	0	1.61015e-05	Bacteria;Proteobacteria;Alphaproteobacteria;Caulobacterales;Hyphomonadaceae;Robiginitomaculum;uncultured bacterium
g_test	chimney_activity	New.ReferenceOTU2430	647.734	0	4	0.000138842	0	0.0030635	2.58796e-05	9.21674e-06	0	0	Bacteria;Bacteroidetes;Flavobacteriia;Flavobacteriales;R103-B20;uncultured bacterium;uncultured bacterium
g_test	chimney_activity	FJ497575.1.1344	644.281	0	4	0	0	0	3.05849e-05	3.6867e-06	5.50981e-06	0.0296751	Bacteria;Proteobacteria;Alphaproteobacteria;Rhodobacterales;Rhodobacteraceae;Pacificibacter;uncultured alpha proteobacterium
g_test	chimney_activity	GU061084.1.1385	633.898	0	4	2.09215e-05	1.44673e-05	0	0.000141161	0.00357978	0	0	Bacteria;Proteobacteria;Alphaproteobacteria;Rhodobacterales;Rhodobacteraceae
g_test	chimney_activity	New.ReferenceOTU2614	631.996	0	5	9.69995e-05	1.80841e-06	0.00289079	4.70537e-06	1.84335e-06	0	0	Bacteria;Candidate division OP9;uncultured bacterium;uncultured bacterium;uncultured bacterium;uncultured bacterium;uncultured bacterium
g_test	chimney_activity	JQ287046.1.1504	626.699	0	5	0	1.80841e-06	4.10194e-05	0.000487006	0.00328116	1.8366e-06	0	Bacteria;Proteobacteria;Gammaproteobacteria;Thiotrichales;Thiotrichaceae;uncultured;uncultured bacterium
g_test	chimney_activity	AB476192.1.1399	623.87	0	4	0	0	1.94303e-05	0.000298791	0.00323508	0	0.00020932	Bacteria;Proteobacteria;Alphaproteobacteria;Caulobacterales;Hyphomonadaceae;Robiginitomaculum;uncultured bacterium
g_test	chimney_activity	AF449251.1.1429	611.488	0	6	0.00286814	1.08505e-05	2.15892e-06	8.70494e-05	3.6867e-06	5.50981e-06	0	Bacteria;Proteobacteria;Epsilonproteobacteria;Campylobacterales;Helicobacteraceae;Sulfurovum
g_test	chimney_activity	AB095131.1.1049	600.353	0	4	0.000543958	0.00150279	0.000429625	4.70537e-06	0	0	0	Archaea;Euryarchaeota;Archaeoglobi;Archaeoglobales;Archaeoglobaceae;uncultured;uncultured archaeon
g_test	chimney_activity	AY327886.1.1491	585.192	0	5	0.000642859	1.80841e-06	0.00214381	1.17634e-05	1.10601e-05	0	0	Bacteria;Proteobacteria;Deltaproteobacteria;Desulfobacterales;Desulfobulbaceae;Desulfobulbus;uncultured bacterium
g_test	chimney_activity	JN873958.1.1467	578.727	0	6	0.000182587	0.000106696	6.26086e-05	0.00443952	0.00137145	0	8.05075e-05	Bacteria;Proteobacteria;Epsilonproteobacteria;Campylobacterales;Helicobacteraceae;Sulfurovum;uncultured bacterium
g_test	chimney_activity	New.ReferenceOTU2573	578.613	0	4	2.66273e-05	0.000815593	0.00172066	0	0	1.8366e-06	0	Bacteria;Proteobacteria;Epsilonproteobacteria;Nautiliales;Nautiliaceae;Caminibacter;uncultured bacterium
g_test	chimney_activity	New.ReferenceOTU2434	572.303	0	4	0.000195901	0	0.00285193	7.05806e-06	7.00472e-05	0	0	Bacteria;Chloroflexi;Anaerolineae;Anaerolineales;Anaerolineaceae;uncultured;uncultured organism
g_test	chimney_activity	AF356635.1.1411	567.49	0	5	9.50975e-06	2.53177e-05	0.00267274	2.35269e-06	5.53005e-06	0	0	Archaea;Euryarchaeota;Thermoplasmata;Thermoplasmatales;Deep Sea Hydrothermal Vent Gp 2(DHVEG-2);uncultured archaeon;uncultured archaeon
g_test	chimney_activity	FN554151.1.1500	565.956	0	4	0	0	0	2.35269e-06	5.89872e-05	1.8366e-06	0.0257785	Bacteria;Proteobacteria;Gammaproteobacteria;Thiotrichales;Thiotrichaceae;uncultured;uncultured sediment bacterium
g_test	chimney_activity	AX039566.8.1529	564.432	0	5	0	1.80841e-06	6.69265e-05	0	7.37339e-06	0.00344914	1.61015e-05	Bacteria;Proteobacteria;Gammaproteobacteria;Enterobacteriales;Enterobacteriaceae;Escherichia-Shigella
g_test	chimney_activity	New.ReferenceOTU1479	564.223	0	4	0	0	0	0.000141161	0.00274659	0.000123053	0.00020932	Bacteria;Bacteroidetes;Cytophagia;Cytophagales;Flammeovirgaceae;uncultured;uncultured bacterium
g_test	chimney_activity	New.ReferenceOTU1353	562.393	0	4	0.000699918	0.00124599	0.000395082	0	5.53005e-06	0	0	Bacteria;Proteobacteria;Deltaproteobacteria;Desulfurellales;Desulfurellaceae;Hippea
g_test	chimney_activity	JN662191.1.1362	557.577	0	6	0.0022424	8.86121e-05	7.34032e-05	1.17634e-05	3.6867e-06	0	3.2203e-05	Bacteria;Proteobacteria;Epsilonproteobacteria;Campylobacterales;Helicobacteraceae;Sulfurovum;uncultured bacterium
g_test	chimney_activity	EU774572.1.1342	553.872	0	4	5.70585e-06	0	9.06746e-05	0	1.84335e-06	0.00353914	0	Bacteria;Cyanobacteria;Chloroplast
g_test	chimney_activity	New.ReferenceOTU782	549.065	0	4	0.00196662	0.000245944	6.04497e-05	2.35269e-06	0	0	0	Bacteria;Proteobacteria;Epsilonproteobacteria;Campylobacterales;Helicobacteraceae;Sulfurovum
g_test	chimney_activity	New.ReferenceOTU1966	522.839	0	4	0.00220246	0	2.80659e-05	2.35269e-06	9.21674e-06	0	0	Bacteria;Bacteroidetes;VC2,1 Bac22
g_test	chimney_activity	New.ReferenceOTU2318	512.21	0	5	1.90195e-06	0	0	0.000162335	0.00256225	5.50981e-06	0.000515248	Bacteria;Proteobacteria;Alphaproteobacteria;Caulobacterales;Hyphomonadaceae;Robiginitomaculum;uncultured bacterium
g_test	chimney_activity	JQ712413.1.1383	509.723	0	5	0.000753172	0.00270176	2.15892e-06	0.00059523	6.26739e-05	0	0	Bacteria;Proteobacteria;Epsilonproteobacteria;Campylobacterales;Helicobacteraceae;Sulfurimonas;uncultured epsilon proteobacterium
g_test	chimney_activity	New.ReferenceOTU781	503.572	0	4	0	0	0	4.23484e-05	0.00146546	1.8366e-06	0.0103211	Bacteria;Planctomycetes;Planctomycetacia;Planctomycetales;Planctomycetaceae;Bythopirellula;uncultured bacterium
g_test	chimney_activity	New.ReferenceOTU2448	503.226	0	4	0	0	0	0.000651694	0.00216593	1.8366e-06	1.61015e-05	Unassigned
g_test	chimney_activity	New.ReferenceOTU439	499.056	0	4	3.42351e-05	0	0	0.00353138	0.000173275	0	4.83045e-05	Bacteria;Bacteroidetes;Flavobacteriia;Flavobacteriales;Flavobacteriaceae;Lutibacter;uncultured Bacteroidetes bacterium
g_test	chimney_activity	AB842279.1.1433	495.748	0	7	2.28234e-05	1.98925e-05	9.93102e-05	0.00403486	0.000289406	5.50981e-06	1.61015e-05	Bacteria;Proteobacteria;Epsilonproteobacteria;Campylobacterales;Helicobacteraceae;Sulfurovum;uncultured Sulfurovum sp,
g_test	chimney_activity	New.CleanUp.ReferenceOTU474543	479.245	0	5	0.00206362	3.43598e-05	2.15892e-06	1.41161e-05	1.10601e-05	0	0	Bacteria;Proteobacteria;Epsilonproteobacteria;Campylobacterales;Helicobacteraceae;Sulfurovum;uncultured bacterium
g_test	chimney_activity	FN562850.1.1368	476.783	0	7	0.00105368	7.77616e-05	0.00147454	4.4701e-05	5.34571e-05	2.20393e-05	4.83045e-05	Bacteria;Proteobacteria;Epsilonproteobacteria;Campylobacterales;Helicobacteraceae;Sulfurovum;uncultured epsilon proteobacterium
g_test	chimney_activity	New.CleanUp.ReferenceOTU234817	474.316	0	5	0	0	3.88605e-05	0.00124928	0.0018286	1.8366e-06	1.61015e-05	Bacteria;Proteobacteria;Gammaproteobacteria;Thiotrichales;Piscirickettsiaceae;endosymbionts;uncultured bacterium
g_test	chimney_activity	New.ReferenceOTU224	468.756	0	4	1.90195e-06	0	0.00226039	9.41075e-06	1.84335e-06	0	0	Bacteria;Aquificae;Aquificae;Aquificales;Desulfurobacteriaceae
g_test	chimney_activity	New.ReferenceOTU787	462.781	0	4	0.00130474	0.000620285	1.29535e-05	1.17634e-05	0	0	0	Bacteria;Proteobacteria;Epsilonproteobacteria;Campylobacterales;Campylobacteraceae;Arcobacter;uncultured epsilon proteobacterium
g_test	chimney_activity	DQ395479.1.1517	460.597	0	4	0	0	0	1.88215e-05	0.000105071	0.002248	0.000676263	Bacteria;Proteobacteria;Alphaproteobacteria;Rickettsiales;Rickettsiaceae;Rickettsia
g_test	chimney_activity	New.ReferenceOTU40	451.582	0	5	0.00149874	0.000491887	0.000284977	0.000115282	7.37339e-06	0	0	Bacteria;Proteobacteria;Epsilonproteobacteria;Campylobacterales;Helicobacteraceae;Sulfurovum;uncultured bacterium
g_test	chimney_activity	AB476228.1.1464	444.155	0	5	4.94507e-05	5.42523e-06	6.47675e-06	0.00218565	0.00109495	0	0	Bacteria;Proteobacteria;Gammaproteobacteria;Thiotrichales;Thiotrichaceae;uncultured;uncultured bacterium
g_test	chimney_activity	JN873951.1.1482	435.19	0	5	4.75488e-05	1.80841e-06	0.00230357	6.11698e-05	1.47468e-05	0	0	Bacteria;Proteobacteria;Epsilonproteobacteria;Campylobacterales;Helicobacteraceae;Sulfurovum;uncultured bacterium
g_test	chimney_activity	JQ287110.1.1470	431.023	0	6	0.00240977	0.000924097	1.72713e-05	0.000771681	1.84335e-05	1.8366e-06	0	Bacteria;Proteobacteria;Epsilonproteobacteria;Campylobacterales;Helicobacteraceae;Sulfurovum;uncultured bacterium
g_test	chimney_activity	AB842286.1.1461	426.821	0	5	7.6078e-06	0	0	0.000214094	0.00100278	0.000168968	0.00887193	Bacteria;Verrucomicrobia;Verrucomicrobiae;Verrucomicrobiales;DEV007;uncultured bacterium;uncultured bacterium
g_test	chimney_activity	FJ905650.1.1392	417.276	0	4	0	0	0	0.000181157	0.00176224	1.8366e-06	0.00276946	Bacteria;Planctomycetes;Planctomycetacia;Planctomycetales;Planctomycetaceae;Planctomyces;uncultured bacterium
g_test	chimney_activity	New.ReferenceOTU929	415.378	0	5	0.00186772	1.44673e-05	0	7.05806e-06	2.58069e-05	0	1.61015e-05	Bacteria;Bacteroidetes;VC2,1 Bac22;uncultured bacterium;uncultured bacterium;uncultured bacterium;uncultured bacterium
g_test	chimney_activity	New.ReferenceOTU2124	414.651	0	5	0.000346155	3.61682e-06	1.07946e-05	0.00161865	0.00260465	0	0	Bacteria;Bacteroidetes;Flavobacteriia;Flavobacteriales;Flavobacteriaceae;uncultured
g_test	chimney_activity	New.ReferenceOTU1055	412.262	0	4	0.000949073	0.000609434	0.000224527	1.88215e-05	0	0	0	Bacteria;Candidate division SR1;uncultured bacterium;uncultured bacterium;uncultured bacterium;uncultured bacterium;uncultured bacterium
g_test	chimney_activity	New.ReferenceOTU761	405.261	0	5	1.14117e-05	1.80841e-06	0.000183508	0.00243738	0.00121661	0	0	Bacteria;Bacteroidetes;Flavobacteriia;Flavobacteriales;Flavobacteriaceae;uncultured Bacteroidetes bacterium;uncultured Bacteroidetes bacterium
g_test	chimney_activity	EU772607.1.1332	402.838	0	5	1.90195e-06	0	3.45427e-05	0	1.84335e-06	0.00239677	1.61015e-05	Bacteria;Proteobacteria;Gammaproteobacteria;Enterobacteriales;Enterobacteriaceae;Enterobacter;uncultured bacterium
g_test	chimney_activity	AB858629.1.1389	402.506	0	4	0.000203509	1.80841e-06	0	0.000755212	0.00264152	0	0	Bacteria;Spirochaetae;Spirochaetes;Spirochaetales;Spirochaetaceae;Spirochaeta;uncultured bacterium
g_test	chimney_activity	EF687341.1.1355	393.872	0	6	0.000601016	0.000220626	1.29535e-05	0.00552881	0.000855314	1.8366e-06	0	Bacteria;Proteobacteria;Epsilonproteobacteria;Campylobacterales;Helicobacteraceae;Sulfurimonas;uncultured sediment bacterium
g_test	chimney_activity	FN562908.1.1347	385.585	0	4	0	0	4.31784e-06	0.000832851	0.00138067	0	0.000579654	Bacteria;Bacteroidetes;Flavobacteriia;Flavobacteriales;Flavobacteriaceae;uncultured
g_test	chimney_activity	DQ415790.1.1470	382.243	0	5	1.71176e-05	1.80841e-05	6.04497e-05	0.00264677	0.000536414	0	0	Bacteria;Proteobacteria;Epsilonproteobacteria;Campylobacterales;Helicobacteraceae;Sulfurovum;uncultured bacterium
g_test	chimney_activity	JQ195940.1.1350	380.983	0	4	7.03722e-05	5.42523e-06	0	0.000809324	0.00190234	0	0	Bacteria;Bacteroidetes;Flavobacteriia;Flavobacteriales;Cryomorphaceae;Fluviicola;uncultured bacterium
g_test	chimney_activity	JQ287071.1.1470	377.901	0	7	0.000880603	0.000963882	0.000103628	0.00996833	5.53005e-06	1.8366e-06	4.83045e-05	Bacteria;Proteobacteria;Epsilonproteobacteria;Campylobacterales;Helicobacteraceae;Sulfurovum;uncultured epsilon proteobacterium
g_test	chimney_activity	New.CleanUp.ReferenceOTU572128	373.406	0	4	0.00202938	0	0.000343268	0.000108224	0.000165901	0	0	Bacteria;Proteobacteria;Deltaproteobacteria;Desulfobacterales;Desulfobulbaceae;Desulfobulbus;uncultured bacterium
g_test	chimney_activity	FN562851.1.1351	368.961	0	5	0.000606722	0.00108866	6.47675e-06	6.35225e-05	0	1.8366e-06	0	Bacteria;Proteobacteria;Epsilonproteobacteria;Campylobacterales;Helicobacteraceae;Sulfurovum;uncultured bacterium
g_test	chimney_activity	FJ205286.1.1488	361.065	0	4	0	3.61682e-06	0	0	1.84335e-06	1.8366e-06	0.0171642	Bacteria;Proteobacteria;Gammaproteobacteria;Thiotrichales;Thiotrichaceae;uncultured
g_test	chimney_activity	JQ712408.1.1373	354.962	0	7	0.00135799	0.000620285	0.000172713	5.64645e-05	0.000156685	1.28562e-05	1.61015e-05	Bacteria;Proteobacteria;Epsilonproteobacteria;Campylobacterales;Helicobacteraceae;Sulfurovum;uncultured epsilon proteobacterium
g_test	chimney_activity	New.ReferenceOTU1047	350.63	0	4	0.000684702	0.000338173	0.000604497	3.05849e-05	0	0	0	Bacteria;Aquificae;Aquificae;Aquificales;Desulfurobacteriaceae;Thermovibrio
g_test	chimney_activity	New.ReferenceOTU1374	349.348	0	4	0	0	0	1.17634e-05	0.00149127	0.000110196	0.0021898	Bacteria;Bacteroidetes;Flavobacteriia;Flavobacteriales;Flavobacteriaceae;Maritimimonas
g_test	chimney_activity	New.CleanUp.ReferenceOTU363246	347.769	0	4	7.6078e-05	0.000128397	0.00143136	7.05806e-06	0	0	0	Archaea;Nanoarchaeota;Nanoarchaeota Incertae Sedis;Unknown Order;Unknown Family;Nanoarchaeum;uncultured nanoarchaeote
g_test	chimney_activity	GU220732.1.1474	335.241	0	6	2.09215e-05	5.42523e-06	0	0.00249855	3.13369e-05	1.8366e-06	0.000112711	Bacteria;Proteobacteria;Epsilonproteobacteria;Campylobacterales;Helicobacteraceae;Sulfurovum;uncultured bacterium
g_test	chimney_activity	New.ReferenceOTU2268	333.498	0	5	0.00532927	0.000815593	2.15892e-06	0.00273147	0.00077605	0	0	Bacteria;Proteobacteria;Gammaproteobacteria;Thiotrichales;Piscirickettsiaceae;Thiomicrospira;uncultured bacterium
g_test	chimney_activity	New.ReferenceOTU2322	330.979	0	4	0	0	0	2.35269e-06	0.000127191	1.8366e-06	0.0142659	Bacteria;Proteobacteria;Gammaproteobacteria;Chromatiales;Ectothiorhodospiraceae;Acidiferrobacter;uncultured bacterium
g_test	chimney_activity	New.ReferenceOTU1982	319.298	0	4	0.00151395	5.42523e-06	0	1.64688e-05	3.13369e-05	0	0	Bacteria;Bacteroidetes;Sphingobacteriia;Sphingobacteriales;WCHB1-69
g_test	chimney_activity	AY531558.1.1384	318.808	0	6	0.00236222	7.0528e-05	7.988e-05	0.000531707	4.05537e-05	1.8366e-06	0	Bacteria;Bacteroidetes;Flavobacteriia;Flavobacteriales;Flavobacteriaceae;Maritimimonas
g_test	chimney_activity	AF068783.1.1439	297.99	0	4	0.00105939	9.94625e-05	9.06746e-05	0	0	1.8366e-06	0	Bacteria;Proteobacteria;Epsilonproteobacteria;Campylobacterales;Helicobacteraceae;Sulfurovum
g_test	chimney_activity	FJ348469.1.1394	296.322	0	4	0	0	0	4.70537e-06	0.00131246	1.8366e-06	0.00228641	Bacteria;Bacteroidetes;Flavobacteriia;Flavobacteriales;Flavobacteriaceae
g_test	chimney_activity	EF219007.1.1376	291.316	0	4	7.22741e-05	0.00116823	0	2.11742e-05	1.84335e-06	0	0	Bacteria;Proteobacteria;Epsilonproteobacteria;Campylobacterales;Helicobacteraceae;Sulfurimonas;uncultured bacterium
g_test	chimney_activity	New.ReferenceOTU2205	290.43	0	4	0	0	0	0.000136456	0.00143044	7.34642e-06	3.2203e-05	Bacteria;Proteobacteria;Gammaproteobacteria;Order Incertae Sedis;Family Incertae Sedis;Marinicella;uncultured bacterium
g_test	chimney_activity	New.ReferenceOTU2528	290.169	0	4	5.70585e-05	0.00113568	2.15892e-06	1.17634e-05	0	0	0	Bacteria;Proteobacteria;Epsilonproteobacteria;Campylobacterales;Helicobacteraceae;Sulfurimonas;uncultured bacterium
g_test	chimney_activity	KC682623.1.1471	288.785	0	5	0	1.80841e-06	4.31784e-06	0.00184686	0.000145625	7.34642e-06	0	Bacteria;Bacteroidetes;Flavobacteriia;Flavobacteriales;Flavobacteriaceae;Lutibacter;uncultured bacterium
g_test	chimney_activity	JN662076.1.1367	287.964	0	4	0.00203889	0.000708897	0	0.000654047	0.000193552	0	0	Bacteria;Proteobacteria;Epsilonproteobacteria;Campylobacterales;Helicobacteraceae;Sulfurimonas
g_test	chimney_activity	New.ReferenceOTU934	284.975	0	5	0	1.80841e-06	2.80659e-05	0.00151278	0.000534571	9.18302e-06	0	Bacteria;Proteobacteria;Zetaproteobacteria;Mariprofundales;Mariprofundaceae;Mariprofundus;uncultured bacterium
g_test	chimney_activity	New.ReferenceOTU1139	279.136	0	4	0.000918642	0.000764957	0	0.000145867	6.45172e-05	0	0	Bacteria;Proteobacteria;Epsilonproteobacteria;Campylobacterales;Helicobacteraceae;Sulfurimonas;uncultured epsilon proteobacterium
g_test	chimney_activity	New.ReferenceOTU1298	278.237	0	6	0.0012667	1.08505e-05	6.47675e-06	2.35269e-06	5.53005e-06	2.02027e-05	0	Bacteria;Proteobacteria;Epsilonproteobacteria;Campylobacterales;Helicobacteraceae;Sulfurovum;uncultured epsilon proteobacterium
g_test	chimney_activity	New.CleanUp.ReferenceOTU886493	275.245	0	5	0.000329037	0.000920481	2.15892e-06	3.7643e-05	5.53005e-06	0	0	Bacteria;Proteobacteria;Epsilonproteobacteria;Campylobacterales;Helicobacteraceae;Sulfurimonas;uncultured bacterium
g_test	chimney_activity	New.ReferenceOTU2307	274.586	0	5	9.31956e-05	0.000763149	0.000371334	4.70537e-06	1.29034e-05	0	0	Bacteria;Proteobacteria;Epsilonproteobacteria;Nautiliales;Nautiliaceae;Nitratifractor
g_test	chimney_activity	AJ441200.1.1419	272.281	0	5	0.000365175	0.000840911	2.15892e-06	1.88215e-05	1.10601e-05	0	0	Bacteria;Proteobacteria;Epsilonproteobacteria;Campylobacterales;Helicobacteraceae;Sulfurimonas
g_test	chimney_activity	New.CleanUp.ReferenceOTU192371	271.843	0	5	0.00106509	0.000104888	2.15892e-06	9.41075e-06	1.84335e-06	0	0	Bacteria;Proteobacteria;Epsilonproteobacteria;Campylobacterales;Helicobacteraceae;Sulfurovum;uncultured bacterium
g_test	chimney_activity	AY531570.1.1473	268.953	0	6	0.00119252	0.000439444	3.88605e-05	0.000207036	1.29034e-05	9.18302e-06	0	Bacteria;Proteobacteria;Epsilonproteobacteria;Campylobacterales;Helicobacteraceae;Sulfurovum;uncultured bacterium
g_test	chimney_activity	HQ807406.1.1453	264.129	0	4	0	0	1.29535e-05	0	5.53005e-06	0.00150051	1.61015e-05	Bacteria;Proteobacteria;Gammaproteobacteria;Enterobacteriales;Enterobacteriaceae;Escherichia-Shigella
g_test	chimney_activity	AB476178.1.1453	262.079	0	4	7.6078e-06	0	4.31784e-06	0.0013975	0.00040738	0	0	Bacteria;Proteobacteria;Gammaproteobacteria;Thiotrichales;Thiotrichaceae;Cocleimonas
g_test	chimney_activity	AB611366.1.906	259.236	0	4	4.94507e-05	0.000130206	0.00103196	4.70537e-06	0	0	0	Archaea;Nanoarchaeota;Nanoarchaeota Incertae Sedis;Unknown Order;Unknown Family;Nanoarchaeum;uncultured nanoarchaeote
g_test	chimney_activity	AY531606.1.1440	257.676	0	6	1.90195e-06	0	0.000431784	0.0002188	0.00273737	1.8366e-06	1.61015e-05	Bacteria;Proteobacteria;Epsilonproteobacteria;Campylobacterales;Campylobacteraceae;Campylobacter;uncultured bacterium
g_test	chimney_activity	New.ReferenceOTU1549	256.746	0	5	0.000823545	0.000452102	2.15892e-06	5.41118e-05	1.65901e-05	0	0	Bacteria;Proteobacteria;Epsilonproteobacteria;Campylobacterales;Helicobacteraceae;Sulfurimonas
g_test	chimney_activity	JX529976.1.1421	254.388	0	4	2.47254e-05	1.80841e-06	0	0.000936369	0.000827664	0	0	Bacteria;Bacteroidetes;Flavobacteriia;Flavobacteriales;Cryomorphaceae;Crocinitomix;uncultured Crocinitomix sp,
g_test	chimney_activity	New.ReferenceOTU1161	253.93	0	4	6.65683e-05	0	0	0.000145867	0.0016074	0	0.000418639	Bacteria;Proteobacteria;Gammaproteobacteria;Order Incertae Sedis;Family Incertae Sedis;Marinicella;uncultured bacterium
g_test	chimney_activity	New.CleanUp.ReferenceOTU827390	250.249	0	4	0	3.61682e-06	2.15892e-06	0.00172922	3.87103e-05	0	0	Bacteria;Bacteroidetes;Flavobacteriia;Flavobacteriales;Flavobacteriaceae;uncultured
g_test	chimney_activity	JQ287298.1.1469	249.108	0	4	0.000412723	0.000690813	0	9.41075e-06	1.47468e-05	0	0	Bacteria;Proteobacteria;Epsilonproteobacteria;Campylobacterales;Campylobacteraceae;Sulfurospirillum;uncultured bacterium
g_test	chimney_activity	New.ReferenceOTU639	241.69	0	5	0.000367076	0.000748682	2.15892e-06	4.23484e-05	1.84335e-06	0	0	Bacteria;Proteobacteria;Epsilonproteobacteria;Campylobacterales;Helicobacteraceae;Sulfurovum;uncultured epsilon proteobacterium
g_test	chimney_activity	JN662112.1.1361	239.445	0	4	0.00100803	3.61682e-06	2.15892e-06	4.70537e-06	0	0	0	Bacteria;Proteobacteria;Epsilonproteobacteria;Campylobacterales;Helicobacteraceae;Sulfurovum;uncultured bacterium
g_test	chimney_activity	New.ReferenceOTU2017	239.03	0	5	1.14117e-05	3.61682e-06	0	0.000150572	0.00128297	0	3.2203e-05	Bacteria;Proteobacteria;Gammaproteobacteria;Order Incertae Sedis;Family Incertae Sedis;Marinicella;uncultured bacterium
g_test	chimney_activity	New.ReferenceOTU556	236.777	0	4	3.8039e-06	3.61682e-06	1.72713e-05	0.0018398	0	0	0	Bacteria;Bacteroidetes;Flavobacteriia;Flavobacteriales;Flavobacteriaceae;Lutibacter;uncultured bacterium
g_test	chimney_activity	FJ535305.1.1335	236.496	0	4	0.000895819	0.000119355	0	7.05806e-06	1.84335e-06	0	0	Bacteria;Proteobacteria;Epsilonproteobacteria;Campylobacterales;Helicobacteraceae;Sulfurimonas;uncultured epsilon proteobacterium
g_test	chimney_activity	New.ReferenceOTU520	233.296	0	4	0.000694212	0.000287537	2.15892e-06	7.05806e-06	0	0	0	Bacteria;Proteobacteria;Epsilonproteobacteria;Campylobacterales;Campylobacteraceae;Thiofractor;uncultured bacterium
g_test	chimney_activity	JN874212.1.1472	220.998	0	6	0.0010708	7.59532e-05	0.0002785	0.000152925	3.31803e-05	1.8366e-06	0	Bacteria;Proteobacteria;Epsilonproteobacteria;Campylobacterales;Helicobacteraceae;Sulfurovum;uncultured epsilon proteobacterium
g_test	chimney_activity	New.ReferenceOTU2209	215.623	0	4	3.8039e-06	0	6.90854e-05	0.00182333	0.000112444	0	0	Bacteria;Proteobacteria;Gammaproteobacteria;Thiotrichales;Thiotrichaceae;uncultured
g_test	chimney_activity	New.CleanUp.ReferenceOTU23903	214.878	0	4	0	0	0	0.000421131	0.00080923	1.8366e-06	4.83045e-05	Bacteria;Proteobacteria;Alphaproteobacteria;Rhizobiales;Phyllobacteriaceae;Pseudahrensia;uncultured bacterium
g_test	chimney_activity	AY672499.1.1488	213.169	0	6	0.000414625	0.000578691	1.29535e-05	3.05849e-05	9.21674e-06	1.8366e-06	0	Bacteria;Proteobacteria;Epsilonproteobacteria;Campylobacterales;Helicobacteraceae;Sulfurovum;uncultured bacterium
g_test	chimney_activity	EF441900.1.1412	212.963	0	7	0.000958583	0.000372532	8.63567e-05	0.00547705	0.000774206	9.18302e-06	1.61015e-05	Bacteria;Proteobacteria;Epsilonproteobacteria;Campylobacterales;Helicobacteraceae;Sulfurimonas
g_test	chimney_activity	AY531602.1.1475	211.348	0	6	0.000323332	2.35093e-05	1.29535e-05	0.00041172	0.00219174	0	8.05075e-05	Bacteria;Proteobacteria;Epsilonproteobacteria;Campylobacterales;Helicobacteraceae;Sulfurovum;uncultured bacterium
g_test	chimney_activity	New.CleanUp.ReferenceOTU815040	208.523	0	4	1.90195e-06	3.61682e-06	0.000986626	2.35269e-06	0	0	0	Bacteria;Proteobacteria;Epsilonproteobacteria;Nautiliales;Nautiliaceae;Nitratifractor;uncultured bacterium
g_test	chimney_activity	AF420346.1.1474	207.14	0	4	0.000726545	0.000119355	1.94303e-05	2.35269e-06	0	0	0	Bacteria;Proteobacteria;Epsilonproteobacteria;Campylobacterales;Helicobacteraceae;Sulfurovum;uncultured bacterium
g_test	chimney_activity	New.ReferenceOTU1434	206.266	0	7	4.18429e-05	3.61682e-06	2.15892e-06	0.000769328	0.000700472	8.44838e-05	0.000161015	Bacteria;Proteobacteria;Alphaproteobacteria;Rhodobacterales;Rhodobacteraceae;uncultured;uncultured bacterium
g_test	chimney_activity	FN553949.1.1479	204.481	0	4	0	0	0	2.35269e-06	0.000558535	3.67321e-06	0.00460503	Bacteria;Bacteroidetes;Cytophagia;Cytophagales;Flammeovirgaceae;uncultured;uncultured bacterium
g_test	chimney_activity	New.CleanUp.ReferenceOTU931727	204.444	0	6	1.90195e-06	0	1.07946e-05	0.00059523	0.000576968	9.18302e-06	0.00120761	Bacteria;Proteobacteria;Alphaproteobacteria;Rhodobacterales;Rhodobacteraceae;uncultured;uncultured bacterium
g_test	chimney_activity	New.ReferenceOTU754	201.064	0	5	1.90195e-06	0	6.47675e-06	0.000936369	0.000409223	0	1.61015e-05	Bacteria;Proteobacteria;Gammaproteobacteria;Thiotrichales;Thiotrichaceae;uncultured;uncultured bacterium
g_test	chimney_activity	New.CleanUp.ReferenceOTU405768	196.995	0	4	3.8039e-06	0	2.15892e-06	0.00131986	7.37339e-05	0	0	Bacteria;Proteobacteria;Gammaproteobacteria;Methylococcales;Marine Methylotrophic Group 2
g_test	chimney_activity	New.ReferenceOTU403	196.505	0	4	3.8039e-05	0.000806551	2.15892e-06	1.88215e-05	0	0	0	Bacteria;Proteobacteria;Epsilonproteobacteria;Campylobacterales;Helicobacteraceae;Sulfurimonas;uncultured bacterium
g_test	chimney_activity	HM799090.1.1392	193.737	0	4	0	0	0	0.000237621	2.21202e-05	1.8366e-06	0.00719737	Bacteria;Proteobacteria;Alphaproteobacteria;Rhodobacterales;Rhodobacteraceae;Roseobacter clade NAC11-7 lineage;uncultured alpha proteobacterium
g_test	chimney_activity	FJ717155.1.1348	192.036	0	5	0.000842564	0.00011393	4.53373e-05	6.11698e-05	5.53005e-06	0	0	Bacteria;Proteobacteria;Epsilonproteobacteria;Campylobacterales;Helicobacteraceae;Sulfurovum;uncultured epsilon proteobacterium
g_test	chimney_activity	DQ223020.1.1315	189.52	0	4	0	1.80841e-06	0	0	5.53005e-06	1.8366e-06	0.00896854	Bacteria;Proteobacteria;Alphaproteobacteria;Rhodobacterales;Rhodobacteraceae;Tateyamaria
g_test	chimney_activity	New.ReferenceOTU1127	187.471	0	5	0.000793113	3.61682e-06	2.15892e-06	2.35269e-06	1.84335e-06	0	0	Bacteria;Proteobacteria;Epsilonproteobacteria;Campylobacterales;Helicobacteraceae;Sulfurimonas;uncultured bacterium
g_test	chimney_activity	New.ReferenceOTU440	185.016	0	4	1.90195e-05	3.25514e-05	0.000822548	0	1.84335e-06	0	0	Bacteria;Proteobacteria;Epsilonproteobacteria;Campylobacterales;Campylobacteraceae;Campylobacter;uncultured epsilon proteobacterium
g_test	chimney_activity	New.ReferenceOTU2248	184.38	0	4	0	0	0	2.35269e-06	0.000442404	0.000343445	0.00170676	Bacteria;Bacteroidetes;Cytophagia;Cytophagales;Flammeovirgaceae;Reichenbachiella;uncultured bacterium
g_test	chimney_activity	New.CleanUp.ReferenceOTU634501	179.874	0	4	0	0	0	9.41075e-06	0.000949325	1.8366e-06	1.61015e-05	Bacteria;Bacteroidetes;Flavobacteriia;Flavobacteriales;Flavobacteriaceae;Lutibacter;uncultured Bacteroidetes bacterium
g_test	chimney_activity	New.ReferenceOTU2402	179.152	0	5	1.90195e-05	3.61682e-06	0	0.000444658	0.00077052	5.50981e-06	0	Bacteria;Proteobacteria;Gammaproteobacteria;Thiotrichales;Piscirickettsiaceae;Thiomicrospira;uncultured gamma proteobacterium
g_test	chimney_activity	New.ReferenceOTU2184	179.012	0	4	0.000100803	2.35093e-05	0	0.00198802	1.10601e-05	0	0	Bacteria;Bacteroidetes;Flavobacteriia;Flavobacteriales;Flavobacteriaceae
g_test	chimney_activity	FR853023.1.1523	175.148	0	5	0.00118682	1.80841e-06	0.000282818	5.88172e-05	0.000237792	0	0	Bacteria;Proteobacteria;Deltaproteobacteria;Desulfobacterales;Desulfobulbaceae;Desulfobulbus;uncultured bacterium
g_test	chimney_activity	JQ712381.1.1383	168.04	0	6	0.00947362	0.00217009	0.000129535	0.00549588	0.00547106	5.50981e-06	0	Bacteria;Proteobacteria;Epsilonproteobacteria;Campylobacterales;Helicobacteraceae;Sulfurimonas;uncultured epsilon proteobacterium
g_test	chimney_activity	New.ReferenceOTU870	164.833	0	5	0	0	8.63567e-06	0.00012234	0.00076499	8.63204e-05	1.61015e-05	Bacteria;Proteobacteria;Gammaproteobacteria;Chromatiales;Ectothiorhodospiraceae;Acidiferrobacter;uncultured bacterium
g_test	chimney_activity	New.ReferenceOTU2265	164.357	0	4	7.6078e-06	0	0.000829024	9.41075e-06	3.6867e-06	0	0	Bacteria;Proteobacteria;Epsilonproteobacteria;Nautiliales;Nautiliaceae;Nitratifractor;uncultured bacterium
g_test	chimney_activity	EU107485.1.1485	163.932	0	4	0	0	0	7.99913e-05	0.00076499	1.8366e-06	0.000402538	Bacteria;Proteobacteria;Gammaproteobacteria;Thiotrichales;Thiotrichaceae;Thiothrix;uncultured bacterium
g_test	chimney_activity	JX403051.1.1513	162.181	0	4	0.000359469	0.000343598	0	4.70537e-06	5.53005e-06	0	0	Bacteria;Proteobacteria;Epsilonproteobacteria;Campylobacterales;Helicobacteraceae;Sulfurovum;uncultured bacterium
g_test	chimney_activity	New.ReferenceOTU985	161.524	0	5	2.28234e-05	0	0.000882997	3.05849e-05	5.53005e-06	1.8366e-06	0	Bacteria;Proteobacteria;Epsilonproteobacteria;Campylobacterales;Helicobacteraceae;Sulfurovum;uncultured epsilon proteobacterium
g_test	chimney_activity	HM185888.1.1371	156.117	0	4	0	1.80841e-06	1.72713e-05	0	0	0.000958708	1.61015e-05	Bacteria;Proteobacteria;Gammaproteobacteria;Enterobacteriales;Enterobacteriaceae
g_test	chimney_activity	New.ReferenceOTU1488	155.615	0	4	0	0	0	9.41075e-06	0.000777893	1.8366e-06	0.000386436	Bacteria;Proteobacteria;Alphaproteobacteria;DB1-14;uncultured bacterium;uncultured bacterium;uncultured bacterium
g_test	chimney_activity	New.ReferenceOTU2287	152.506	0	6	2.47254e-05	0	2.15892e-06	0.000708159	0.000392633	1.8366e-05	0.000273726	Bacteria;Proteobacteria;Alphaproteobacteria;Rhodobacterales;Rhodobacteraceae;uncultured;uncultured bacterium
g_test	chimney_activity	FN562904.1.1341	148.925	0	4	5.32546e-05	5.42523e-06	0	0.00103989	0.000313369	0	0	Bacteria;Bacteroidetes;Flavobacteriia;Flavobacteriales;Flavobacteriaceae;uncultured;uncultured bacterium
g_test	chimney_activity	JQ611155.1.1358	142.742	0	4	0.000287195	0.000327322	0	2.35269e-06	5.53005e-06	0	0	Bacteria;Proteobacteria;Epsilonproteobacteria;Campylobacterales;Campylobacteraceae;Sulfurospirillum;uncultured bacterium
g_test	chimney_activity	New.CleanUp.ReferenceOTU92057	136.9	0	4	0	0	0	2.35269e-06	0.000707846	1.8366e-06	0.000177117	Bacteria;Bacteroidetes;Flavobacteriia;Flavobacteriales;Flavobacteriaceae
g_test	chimney_activity	JQ287050.1.1446	132.048	0	4	0	0	0	1.88215e-05	0.000641485	4.59151e-05	3.2203e-05	Bacteria;Proteobacteria;Alphaproteobacteria;Rhizobiales;Phyllobacteriaceae;Pseudahrensia;uncultured bacterium
g_test	chimney_activity	AJ704703.1.1485	131.702	0	4	0	0	0	7.05806e-06	0.000683882	1.8366e-06	0.000112711	Bacteria;Bacteroidetes;Flavobacteriia;Flavobacteriales;Flavobacteriaceae
g_test	chimney_activity	New.ReferenceOTU389	131.382	0	5	8.55878e-05	5.60607e-05	2.15892e-06	0.00151748	0.000147468	0	0	Bacteria;Proteobacteria;Epsilonproteobacteria;Campylobacterales;Helicobacteraceae;Sulfurovum;uncultured bacterium
g_test	chimney_activity	JQ611114.1.1326	130.288	0	7	0.0012648	6.69112e-05	0.000207256	3.52903e-05	0.000442404	5.50981e-06	4.83045e-05	Bacteria;Proteobacteria;Epsilonproteobacteria;Campylobacterales;Helicobacteraceae;Sulfurovum;uncultured epsilon proteobacterium
g_test	chimney_activity	New.ReferenceOTU1118	127.543	0	4	0	0	0	7.05806e-06	0.000595402	1.8366e-06	0.000692365	Bacteria;Planctomycetes;Planctomycetacia;Planctomycetales;Planctomycetaceae;Pirellula
g_test	chimney_activity	New.ReferenceOTU1871	123.726	0	4	0.00047739	0.000321897	0	9.88128e-05	2.39635e-05	0	0	Bacteria;Proteobacteria;Epsilonproteobacteria;Campylobacterales;Helicobacteraceae;Sulfurimonas
g_test	chimney_activity	GU291345.1.1506	121.966	0	4	3.8039e-06	0	0	5.17591e-05	0.0003742	0.000273654	0	Bacteria;Proteobacteria;Deltaproteobacteria;Desulfuromonadales;Desulfuromonadaceae;Desulfuromusa;uncultured bacterium
g_test	chimney_activity	JX525515.1.1426	121.28	0	4	1.90195e-06	0	2.15892e-06	0.000444658	0.000337333	0	0	Bacteria;Bacteroidetes;Flavobacteriia;Flavobacteriales;Flavobacteriaceae;uncultured
g_test	chimney_activity	FJ628226.1.1466	120.385	0	5	0.000445056	0.000376149	7.7721e-05	0.00369372	0.000191708	0	0	Bacteria;Proteobacteria;Epsilonproteobacteria;Campylobacterales;Helicobacteraceae;Sulfurovum;uncultured bacterium
g_test	chimney_activity	EU050908.1.1396	117.851	0	4	3.8039e-06	0	0	0.000141161	0.000180648	0	0.00328471	Bacteria;Bacteroidetes;Cytophagia;Cytophagales;Flammeovirgaceae;Reichenbachiella;uncultured bacterium
g_test	chimney_activity	JN873940.1.1483	114.277	0	5	0.000739859	0.00015914	6.47675e-06	0.00382312	3.6867e-05	0	0	Bacteria;Proteobacteria;Epsilonproteobacteria;Campylobacterales;Helicobacteraceae;Sulfurimonas;uncultured bacterium
g_test	chimney_activity	New.ReferenceOTU503	112.717	0	4	0.000403214	6.14859e-05	1.29535e-05	0	0	1.8366e-06	0	Bacteria;Proteobacteria;Epsilonproteobacteria;Campylobacterales;Helicobacteraceae;Sulfurovum;uncultured bacterium
g_test	chimney_activity	New.CleanUp.ReferenceOTU407076	112.257	0	4	0.000201607	0.000260411	2.15892e-06	2.35269e-06	0	0	0	Bacteria;Proteobacteria;Epsilonproteobacteria;Campylobacterales;Campylobacteraceae;Thiofractor;uncultured bacterium
g_test	chimney_activity	AB476198.1.1452	111.137	0	5	1.90195e-06	3.61682e-06	1.72713e-05	0.000167041	0.000604618	0	0	Bacteria;Proteobacteria;Gammaproteobacteria;Thiotrichales;Thiotrichaceae;uncultured
g_test	chimney_activity	EU775002.1.1308	110.049	0	4	0	0	8.63567e-06	0	1.84335e-06	0.000646485	1.61015e-05	Bacteria;Proteobacteria;Gammaproteobacteria;Enterobacteriales;Enterobacteriaceae;Escherichia-Shigella
g_test	chimney_activity	AJ535243.1.1522	109.306	0	4	6.46663e-05	0	1.29535e-05	0.00117399	3.6867e-05	0	0	Bacteria;Proteobacteria;Deltaproteobacteria;Desulfobacterales;Desulfobulbaceae;uncultured
g_test	chimney_activity	HQ153866.1.1384	109.061	0	5	0.000247254	0.000224243	8.63567e-06	7.05806e-06	1.84335e-06	0	0	Bacteria;Proteobacteria;Epsilonproteobacteria;Campylobacterales;Helicobacteraceae;Sulfurovum;uncultured bacterium
g_test	chimney_activity	AY672518.1.1495	100.759	0	4	0.000193999	5.42523e-06	0.000261229	2.35269e-06	0	0	0	Bacteria;Proteobacteria;Epsilonproteobacteria;Campylobacterales;Helicobacteraceae;Sulfurovum;uncultured epsilon proteobacterium
g_test	chimney_activity	GQ848454.1.1457	100.528	0	4	0	0	2.15892e-06	0.000689337	1.65901e-05	0	1.61015e-05	Bacteria;Proteobacteria;Epsilonproteobacteria;Campylobacterales;Helicobacteraceae;Sulfurimonas;uncultured epsilon proteobacterium
g_test	chimney_activity	New.ReferenceOTU1731	100.445	0	6	4.94507e-05	1.80841e-06	2.15892e-06	0.0002188	0.000643329	1.8366e-06	0	Bacteria;Proteobacteria;Gammaproteobacteria;Thiotrichales;Piscirickettsiaceae;Thiomicrospira;uncultured gamma proteobacterium
g_test	chimney_activity	New.CleanUp.ReferenceOTU301769	99.1248	0	4	0	0	0	7.05806e-06	0.000475584	1.8366e-06	0.000418639	Unassigned
g_test	chimney_activity	New.ReferenceOTU750	98.4622	0	4	0	1.80841e-06	0	0.000265854	0.000276502	0	0.000547451	Bacteria;Proteobacteria;Alphaproteobacteria;Rhodobacterales;Rhodobacteraceae;uncultured;uncultured bacterium
g_test	chimney_activity	DQ270620.1.1452	96.3969	0	4	0	0	2.15892e-06	3.7643e-05	0.000503234	3.67321e-06	0	Bacteria;Proteobacteria;Gammaproteobacteria;Methylococcales;IheB2-23;uncultured bacterium;uncultured bacterium
g_test	chimney_activity	FJ535264.1.1335	96.3004	0	5	5.70585e-06	1.80841e-06	4.31784e-06	0.000705806	4.79271e-05	0	0	Bacteria;Proteobacteria;Epsilonproteobacteria;Campylobacterales;Helicobacteraceae;Sulfurovum;uncultured bacterium
g_test	chimney_activity	New.CleanUp.ReferenceOTU676157	94.3368	0	4	1.90195e-06	0	8.63567e-06	0.000689337	3.87103e-05	0	0	Bacteria;Bacteroidetes;Sphingobacteriia;Sphingobacteriales;Chitinophagaceae;uncultured;uncultured bacterium
g_test	chimney_activity	New.CleanUp.ReferenceOTU90435	93.8455	0	4	4.37449e-05	0	0	5.64645e-05	0.000693099	1.8366e-06	0	Bacteria;Bacteroidetes;VC2,1 Bac22;uncultured bacterium;uncultured bacterium;uncultured bacterium;uncultured bacterium
g_test	chimney_activity	New.CleanUp.ReferenceOTU436199	92.3826	0	4	0.000454566	0	0	2.35269e-06	5.53005e-06	0	8.05075e-05	Bacteria;Proteobacteria;Gammaproteobacteria;Alteromonadales;Colwelliaceae;Colwellia
g_test	chimney_activity	FR853007.1.1516	89.6368	0	5	0.000475488	5.42523e-06	5.1814e-05	3.05849e-05	2.21202e-05	0	0	Bacteria;Proteobacteria;Deltaproteobacteria;Desulfobacterales;Desulfobulbaceae;Desulfobulbus;uncultured delta proteobacterium
g_test	chimney_activity	New.ReferenceOTU1385	88.7383	0	4	0.000410821	1.80841e-06	0	2.35269e-06	7.37339e-06	0	0	Bacteria;Proteobacteria;Gammaproteobacteria;Thiotrichales;Piscirickettsiaceae;Thiomicrospira;uncultured gamma proteobacterium
g_test	chimney_activity	JX526682.1.1430	88.3816	0	4	0	0	0	3.05849e-05	0.000444247	1.8366e-06	3.2203e-05	Bacteria;Bacteroidetes;Flavobacteriia;Flavobacteriales;Cryomorphaceae;Crocinitomix;uncultured bacterium
g_test	chimney_activity	New.ReferenceOTU2419	87.8898	0	4	0.000235842	3.61682e-06	0.000155442	0	0	1.8366e-06	0	Bacteria;Proteobacteria;Epsilonproteobacteria;Nautiliales;Nautiliaceae;Caminibacter
g_test	chimney_activity	New.ReferenceOTU881	87.5133	0	5	0.000334743	9.22289e-05	2.15892e-06	0	1.84335e-06	1.46928e-05	0	Bacteria;Proteobacteria;Epsilonproteobacteria;Nautiliales;Nautiliaceae;uncultured;uncultured epsilon proteobacterium
g_test	chimney_activity	New.ReferenceOTU1309	86.2832	0	4	1.90195e-06	3.61682e-06	0	0.000383488	0.000210142	0	0	Bacteria;Bacteroidetes;Flavobacteriia;Flavobacteriales;Flavobacteriaceae;uncultured;uncultured bacterium
g_test	chimney_activity	AB476234.1.1464	84.7273	0	4	1.90195e-06	0	1.29535e-05	0.000609346	7.00472e-05	0	0	Bacteria;Proteobacteria;Gammaproteobacteria;Methylococcales;Marine Methylotrophic Group 2;uncultured bacterium;uncultured bacterium
g_test	chimney_activity	JQ712374.1.1378	83.6837	0	4	0.000378488	3.61682e-06	2.15892e-06	9.41075e-06	0	0	0	Bacteria;Proteobacteria;Epsilonproteobacteria;Campylobacterales;Campylobacteraceae;Arcobacter;uncultured epsilon proteobacterium
g_test	chimney_activity	New.CleanUp.ReferenceOTU825255	82.1594	0	4	0.000285293	0.000222434	0	6.11698e-05	9.21674e-06	0	0	Unassigned
g_test	chimney_activity	New.ReferenceOTU1794	81.5473	0	4	7.22741e-05	0.000267645	6.47675e-06	0	0	3.67321e-06	0	Bacteria;Proteobacteria;Epsilonproteobacteria;Nautiliales;Nautiliaceae;Caminibacter;uncultured bacterium
g_test	chimney_activity	New.ReferenceOTU1609	80.0508	0	4	0.000349959	1.08505e-05	0	2.35269e-06	3.6867e-06	0	0	Bacteria;Proteobacteria;Deltaproteobacteria;Bdellovibrionales;Bdellovibrionaceae;Bdellovibrio;uncultured bacterium
g_test	chimney_activity	FJ792191.1.1357	78.9701	0	5	1.33137e-05	1.80841e-06	8.63567e-06	0.000487006	0.000180648	0	0	Bacteria;Bacteroidetes;Sphingobacteriia;Sphingobacteriales;Chitinophagaceae;uncultured;uncultured bacterium
g_test	chimney_activity	FN562823.1.1291	78.3535	0	4	0.000110313	1.80841e-05	0	0.00028938	0.000698629	0	0	Bacteria;Proteobacteria;Gammaproteobacteria;Thiotrichales;Thiotrichaceae;uncultured;uncultured bacterium
g_test	chimney_activity	AY531590.1.1473	77.7795	0	4	1.90195e-06	0	0.000449055	0	1.47468e-05	3.67321e-06	0	Bacteria;Proteobacteria;Epsilonproteobacteria;Campylobacterales;Campylobacteraceae;Campylobacter;uncultured bacterium
g_test	chimney_activity	KF746349.99245.100735	77.5947	0	4	1.90195e-06	0	8.63567e-06	0	1.84335e-06	0.000483027	0	Bacteria;Cyanobacteria;Chloroplast;uncultured bacterium;uncultured bacterium;uncultured bacterium;uncultured bacterium
g_test	chimney_activity	New.CleanUp.ReferenceOTU934045	77.3265	0	4	0.000329037	1.80841e-06	2.15892e-06	2.35269e-06	0	0	0	Bacteria;Proteobacteria;Epsilonproteobacteria;Campylobacterales;Helicobacteraceae;Sulfurimonas;uncultured bacterium
g_test	chimney_activity	FJ535253.1.1337	77.1349	0	4	7.6078e-06	5.42523e-06	0	0.000635225	7.37339e-06	0	0	Bacteria;Proteobacteria;Epsilonproteobacteria;Campylobacterales;Helicobacteraceae;Sulfurimonas;uncultured epsilon proteobacterium
g_test	chimney_activity	New.ReferenceOTU330	75.8814	0	4	3.04312e-05	3.61682e-06	0	0.000712864	3.50236e-05	0	0	Bacteria;Proteobacteria;Epsilonproteobacteria;Campylobacterales;Helicobacteraceae;Sulfurimonas;uncultured bacterium
g_test	chimney_activity	GQ357037.1.1474	75.7671	0	5	0.00138652	0.000119355	0	5.41118e-05	0.000694942	0	8.05075e-05	Bacteria;Proteobacteria;Epsilonproteobacteria;Campylobacterales;Helicobacteraceae;Sulfurimonas;uncultured bacterium
g_test	chimney_activity	KF545063.1.1478	75.6522	0	5	3.8039e-06	3.61682e-06	1.29535e-05	0.000585819	6.63605e-05	0	0	Bacteria;Proteobacteria;Epsilonproteobacteria;Campylobacterales;Helicobacteraceae;Sulfurovum;uncultured Sulfurovum sp,
g_test	chimney_activity	New.ReferenceOTU478	72.4404	0	4	0	0	0	3.05849e-05	0.000129034	1.8366e-06	0.00204489	Bacteria;Proteobacteria;Alphaproteobacteria;OCS116 clade;uncultured bacterium;uncultured bacterium;uncultured bacterium
g_test	chimney_activity	New.ReferenceOTU1002	71.8725	0	4	3.8039e-06	0	1.07946e-05	0.000543471	4.97704e-05	0	0	Bacteria;Bacteroidetes;Flavobacteriia;Flavobacteriales;Flavobacteriaceae
g_test	chimney_activity	DQ071289.1.1344	69.3275	1.94892e-16	6	0.000116019	0.000406892	2.15892e-06	9.88128e-05	1.84335e-05	3.67321e-06	0	Bacteria;Proteobacteria;Epsilonproteobacteria;Campylobacterales;Campylobacteraceae;Arcobacter;uncultured epsilon proteobacterium
g_test	chimney_activity	GQ261309.1.1421	68.5911	1.94892e-16	5	3.8039e-06	5.42523e-06	1.72713e-05	0.000155277	0.000388947	0	0	Bacteria;Proteobacteria;Epsilonproteobacteria;Campylobacterales;Helicobacteraceae;Sulfurovum;uncultured epsilon proteobacterium
g_test	chimney_activity	AF449231.1.1429	67.9844	1.94892e-16	5	0.000346155	1.98925e-05	4.31784e-06	2.82322e-05	0	1.8366e-06	0	Bacteria;Proteobacteria;Epsilonproteobacteria;Campylobacterales;Helicobacteraceae;Sulfurovum;uncultured bacterium
g_test	chimney_activity	New.CleanUp.ReferenceOTU223912	66.9289	5.83093e-16	5	3.04312e-05	3.61682e-06	4.31784e-06	0.000343492	0.000285719	0	0	Bacteria;Bacteroidetes;Flavobacteriia;Flavobacteriales;Cryomorphaceae;Fluviicola
g_test	chimney_activity	New.ReferenceOTU106	62.8562	3.87678e-15	4	0.000163568	0.000108505	4.31784e-06	4.70537e-06	0	0	0	Bacteria;Proteobacteria;Epsilonproteobacteria;Campylobacterales;Helicobacteraceae;Sulfurovum;uncultured bacterium
g_test	chimney_activity	New.ReferenceOTU2533	62.4448	4.83291e-15	4	0.000220626	0.000320089	0	0.000134103	2.02768e-05	0	0	Bacteria;Proteobacteria;Epsilonproteobacteria;Campylobacterales;Helicobacteraceae;Sulfurovum;uncultured bacterium
g_test	chimney_activity	New.CleanUp.ReferenceOTU203232	61.2152	8.86865e-15	4	0.000439351	3.61682e-06	0	3.05849e-05	4.42404e-05	0	0	Bacteria;Bacteroidetes;Bacteroidia;Bacteroidales;Marinilabiaceae;uncultured
g_test	chimney_activity	New.CleanUp.ReferenceOTU650884	61.0786	9.42172e-15	4	0	0	1.51124e-05	0.00035055	6.63605e-05	0	0.00064406	Bacteria;Bacteroidetes;Flavobacteriia;Flavobacteriales;Flavobacteriaceae
g_test	chimney_activity	New.ReferenceOTU1897	60.7147	1.13142e-14	4	0.000228234	5.60607e-05	0	4.70537e-06	3.6867e-06	0	0	Bacteria;Proteobacteria;Epsilonproteobacteria;Campylobacterales;Campylobacteraceae;Sulfurospirillum;uncultured bacterium
g_test	chimney_activity	New.ReferenceOTU953	59.9769	1.64479e-14	4	0	1.80841e-06	0	6.82279e-05	0.000285719	0	1.61015e-05	Bacteria;Proteobacteria;Gammaproteobacteria;Order Incertae Sedis;Family Incertae Sedis;Marinicella;uncultured bacterium
g_test	chimney_activity	HM481300.1.1434	59.8685	1.73579e-14	5	1.52156e-05	0.000303813	0	4.70537e-06	1.84335e-05	0	1.61015e-05	Bacteria;Proteobacteria;Epsilonproteobacteria;Campylobacterales;Helicobacteraceae;Sulfurimonas;uncultured bacterium
g_test	chimney_activity	AJ441204.1.1419	57.3791	6.16377e-14	4	1.71176e-05	0	2.15892e-06	0.000515238	1.65901e-05	0	0	Bacteria;Proteobacteria;Epsilonproteobacteria;Campylobacterales;Helicobacteraceae;Sulfurovum;uncultured bacterium
g_test	chimney_activity	New.CleanUp.ReferenceOTU229444	57.1928	6.75462e-14	4	0	0	0	8.70494e-05	0.000226732	1.8366e-06	9.6609e-05	Bacteria;Proteobacteria;Deltaproteobacteria;Bdellovibrionales;Bdellovibrionaceae;OM27 clade;uncultured bacterium
g_test	chimney_activity	New.ReferenceOTU2188	54.2652	2.98395e-13	4	0.000251057	1.80841e-06	0	4.70537e-06	1.84335e-06	0	0	Bacteria;Proteobacteria;Deltaproteobacteria;Desulfobacterales;Desulfobulbaceae;Desulfobulbus;uncultured delta proteobacterium
g_test	chimney_activity	AB193955.1.1475	54.2607	2.98395e-13	4	0	0	1.51124e-05	0.000348198	0.000101384	1.8366e-06	0	Bacteria;Proteobacteria;Epsilonproteobacteria;Campylobacterales;Helicobacteraceae;Sulfurovum;uncultured bacterium
g_test	chimney_activity	New.CleanUp.ReferenceOTU1069314	54.1354	3.17377e-13	4	0.000192097	0.000115738	0	3.05849e-05	1.84335e-06	0	0	Bacteria;Proteobacteria;Gammaproteobacteria;Thiotrichales;Piscirickettsiaceae;Thiomicrospira;uncultured bacterium
g_test	chimney_activity	New.ReferenceOTU1277	53.9753	3.43394e-13	4	0.000150254	2.89346e-05	0	0.000432894	0.000540101	0	0	Unassigned
g_test	chimney_activity	JQ287089.1.1471	52.742	6.41551e-13	5	0.000102705	3.61682e-06	0	0.000806971	4.05537e-05	0	4.83045e-05	Bacteria;Proteobacteria;Epsilonproteobacteria;Campylobacterales;Helicobacteraceae;Sulfurovum;uncultured bacterium
g_test	chimney_activity	New.ReferenceOTU993	52.6587	6.6771e-13	4	8.93917e-05	0.000155523	0	0	0	5.50981e-06	1.61015e-05	Bacteria;Proteobacteria;Epsilonproteobacteria;Nautiliales;Nautiliaceae;Caminibacter;uncultured bacterium
g_test	chimney_activity	New.CleanUp.ReferenceOTU331555	51.4154	1.25427e-12	4	0	1.80841e-06	0	3.52903e-05	0.000265442	0	1.61015e-05	Bacteria;Proteobacteria;Gammaproteobacteria;Order Incertae Sedis;Family Incertae Sedis;Marinicella;uncultured bacterium
g_test	chimney_activity	New.CleanUp.ReferenceOTU815228	50.4356	2.06075e-12	4	7.6078e-06	1.80841e-06	0	0.00041172	1.29034e-05	0	0	Bacteria;Bacteroidetes;Flavobacteriia;Flavobacteriales;Flavobacteriaceae;Lutibacter;uncultured bacterium
g_test	chimney_activity	New.CleanUp.ReferenceOTU366342	48.8764	4.55045e-12	4	0	0	0	6.58752e-05	0.000178805	1.8366e-06	0.000273726	Bacteria;Proteobacteria;Alphaproteobacteria;DB1-14;uncultured bacterium;uncultured bacterium;uncultured bacterium
g_test	chimney_activity	EU652527.1.1506	47.9571	7.25356e-12	4	0	3.61682e-06	0	0	1.84335e-06	1.8366e-06	0.00249573	Bacteria;Proteobacteria;Gammaproteobacteria;Xanthomonadales;JTB255 marine benthic group;uncultured bacterium;uncultured bacterium
g_test	chimney_activity	AY355296.1.1417	47.8721	7.55516e-12	5	0.000144548	1.62757e-05	6.47675e-05	2.35269e-06	1.84335e-06	0	0	Bacteria;Proteobacteria;Epsilonproteobacteria;Nautiliales;Nautiliaceae;Nitratifractor;uncultured bacterium
g_test	chimney_activity	HQ153979.1.1370	47.0549	1.14332e-11	5	0.000135038	0.000112121	1.07946e-05	2.35269e-06	1.65901e-05	0	0	Bacteria;Proteobacteria;Epsilonproteobacteria;Campylobacterales;Helicobacteraceae;Sulfurovum;uncultured bacterium
g_test	chimney_activity	New.CleanUp.ReferenceOTU22432	47.0339	1.15268e-11	4	0.000239646	0	4.74962e-05	1.17634e-05	1.65901e-05	0	0	Bacteria;Proteobacteria;Deltaproteobacteria;Desulfobacterales;Desulfobulbaceae;Desulfobulbus;uncultured bacterium
g_test	chimney_activity	FR852934.1.922	46.9664	1.19005e-11	4	0.000119823	1.80841e-06	0.000105787	0	3.6867e-06	0	0	Archaea;Euryarchaeota;Thermoplasmata;Thermoplasmatales;Deep Sea Hydrothermal Vent Gp 2(DHVEG-2);uncultured archaeon;uncultured archaeon
g_test	chimney_activity	New.CleanUp.ReferenceOTU1067318	45.5137	2.49153e-11	4	0.000226332	1.80841e-05	0	9.41075e-06	7.37339e-06	0	0	Unassigned
g_test	chimney_activity	New.CleanUp.ReferenceOTU617032	44.548	4.06948e-11	4	0.000228234	3.9785e-05	0	3.05849e-05	1.84335e-06	0	0	Bacteria;Proteobacteria;Gammaproteobacteria;Thiotrichales;Piscirickettsiaceae;Thiomicrospira;uncultured gamma proteobacterium
g_test	chimney_activity	JN874221.1.1469	43.8019	5.9423e-11	5	0.000669487	0.000837294	0.000727555	0.00195508	0.000105071	0	0	Bacteria;Proteobacteria;Epsilonproteobacteria;Campylobacterales;Helicobacteraceae;Sulfurovum;uncultured bacterium
g_test	chimney_activity	New.CleanUp.ReferenceOTU429020	41.6864	1.74797e-10	4	7.6078e-06	0	0	4.70537e-05	0.000228575	1.10196e-05	0	Bacteria;Proteobacteria;Deltaproteobacteria;Desulfobacterales;Desulfobulbaceae;Desulfobulbus;uncultured bacterium
g_test	chimney_activity	AB176113.1.1296	40.3629	3.43185e-10	5	3.8039e-05	1.80841e-06	2.15892e-06	0.000190568	0.000252539	0	0	Bacteria;Proteobacteria;Epsilonproteobacteria;Campylobacterales;Helicobacteraceae;Sulfurimonas;uncultured bacterium
g_test	chimney_activity	JX403058.1.1513	39.7688	4.64009e-10	4	0.000104607	0.000368916	0	0.000136456	5.89872e-05	0	0	Bacteria;Proteobacteria;Epsilonproteobacteria;Campylobacterales;Helicobacteraceae;Sulfurimonas
g_test	chimney_activity	FN562878.1.1304	39.7357	4.70763e-10	6	0.000625742	0.000222434	0.000427466	0.000414073	0.00044056	0	6.4406e-05	Bacteria;BD1-5;uncultured bacterium;uncultured bacterium;uncultured bacterium;uncultured bacterium;uncultured bacterium
g_test	chimney_activity	New.CleanUp.ReferenceOTU813257	38.7366	7.83318e-10	4	1.90195e-06	0	6.47675e-06	0.000308202	1.84335e-05	0	0	Bacteria;Proteobacteria;Gammaproteobacteria;Thiotrichales;Piscirickettsiaceae;Thiomicrospira;uncultured gamma proteobacterium
g_test	chimney_activity	New.ReferenceOTU1513	38.3833	9.36414e-10	4	0	7.23364e-06	2.15892e-06	0.000282322	4.60837e-05	0	0	Bacteria;Proteobacteria;Gammaproteobacteria;Thiotrichales;Piscirickettsiaceae;Thiomicrospira;uncultured gamma proteobacterium
g_test	chimney_activity	New.ReferenceOTU446	38.3572	9.46685e-10	4	0.00044886	0	8.63567e-06	2.58796e-05	0.000127191	0	0	Bacteria;Proteobacteria;Deltaproteobacteria;Desulfobacterales;Desulfobulbaceae;Desulfobulbus
g_test	chimney_activity	DQ925875.1.1395	37.4929	1.47068e-09	4	3.8039e-06	0.000153715	2.15892e-06	0	1.84335e-06	0	0	Bacteria;Proteobacteria;Epsilonproteobacteria;Campylobacterales;Campylobacteraceae;Campylobacter;uncultured epsilon proteobacterium
g_test	chimney_activity	New.CleanUp.ReferenceOTU859632	37.0773	1.81101e-09	4	1.90195e-06	0	0	0.000244679	2.39635e-05	1.8366e-06	0	Bacteria;Proteobacteria;Epsilonproteobacteria;Campylobacterales;Helicobacteraceae;Sulfurovum;uncultured bacterium
g_test	chimney_activity	FM179903.1.1493	37.0773	1.81101e-09	4	0	0	2.15892e-06	0.000228211	3.6867e-05	1.8366e-06	0	Bacteria;Proteobacteria;Gammaproteobacteria;Methylococcales;Marine Methylotrophic Group 2;uncultured bacterium;uncultured bacterium
g_test	chimney_activity	New.ReferenceOTU46	36.6728	2.22303e-09	6	0.000114117	9.04205e-06	2.15892e-06	0.000228211	0.000422127	3.67321e-06	0	Bacteria;Proteobacteria;Gammaproteobacteria;Thiotrichales;Piscirickettsiaceae;Thiomicrospira;uncultured gamma proteobacterium
g_test	chimney_activity	New.CleanUp.ReferenceOTU26971	36.5813	2.32417e-09	4	7.41761e-05	3.25514e-05	6.26086e-05	0	1.84335e-06	0	0	Bacteria;BD1-5;uncultured bacterium;uncultured bacterium;uncultured bacterium;uncultured bacterium;uncultured bacterium
g_test	chimney_activity	EU050905.1.1397	35.5759	3.88406e-09	4	3.8039e-06	1.80841e-06	0	0.000134103	0.000127191	0	0	Bacteria;Bacteroidetes;Flavobacteriia;Flavobacteriales;Cryomorphaceae;Crocinitomix;uncultured bacterium
g_test	chimney_activity	JQ712429.1.1383	34.841	5.65074e-09	4	1.90195e-06	1.80841e-06	0	2.35269e-06	0.000215672	0	0	Bacteria;Bacteroidetes;Flavobacteriia;Flavobacteriales;NS9 marine group
g_test	chimney_activity	FJ001805.1.1397	34.2608	7.5945e-09	4	0.000112215	9.22289e-05	0	9.41075e-06	1.29034e-05	0	0	Bacteria;BD1-5;uncultured bacterium;uncultured bacterium;uncultured bacterium;uncultured bacterium;uncultured bacterium
g_test	chimney_activity	KC001528.1.1315	33.8375	9.41676e-09	4	1.90195e-06	1.80841e-06	0	1.41161e-05	0.000200925	0	0	Bacteria;Proteobacteria;Alphaproteobacteria;Rhodobacterales;Rhodobacteraceae
g_test	chimney_activity	GU235798.1.1298	33.6756	1.02092e-08	4	0	1.80841e-06	0	9.41075e-06	0.000125348	0	0.000579654	Bacteria;Proteobacteria;Alphaproteobacteria;Rhodobacterales;Rhodobacteraceae;Roseobacter clade NAC11-7 lineage
g_test	chimney_activity	New.ReferenceOTU226	32.0284	2.37651e-08	4	0.000116019	1.26589e-05	1.72713e-05	2.35269e-06	0	0	0	Bacteria;Proteobacteria;Epsilonproteobacteria;Nautiliales;Nautiliaceae;Caminibacter
g_test	chimney_activity	FM165259.1.1482	29.8708	7.20624e-08	5	8.55878e-05	0.000137439	0.00113559	0.0030632	0.000140094	0	0	Bacteria;Proteobacteria;Epsilonproteobacteria;Campylobacterales;Helicobacteraceae;Sulfurovum;uncultured bacterium
g_test	chimney_activity	New.ReferenceOTU433	29.2081	1.01194e-07	5	0.000336645	7.41448e-05	0	0.000105871	7.37339e-05	1.8366e-06	0	Bacteria;Proteobacteria;Gammaproteobacteria;Thiotrichales;Piscirickettsiaceae;Thiomicrospira;uncultured gamma proteobacterium
g_test	chimney_activity	DQ009101.1.2103	28.2474	1.65787e-07	4	0	1.80841e-06	0	4.70537e-06	7.37339e-05	0	0.000805075	Bacteria;Bacteroidetes;Flavobacteriia;Flavobacteriales;Flavobacteriaceae
g_test	chimney_activity	New.CleanUp.ReferenceOTU986809	27.1984	2.84443e-07	4	0.000116019	8.68037e-05	0	0	3.31803e-05	1.8366e-06	0	Bacteria;Proteobacteria;Epsilonproteobacteria;Campylobacterales;Helicobacteraceae;Sulfurimonas;uncultured bacterium
g_test	chimney_activity	AB842287.1.1428	26.8665	3.3691e-07	4	0.00014645	1.44673e-05	0	7.05806e-06	9.21674e-06	0	0	Bacteria;Proteobacteria;Epsilonproteobacteria;Campylobacterales;Helicobacteraceae;Sulfurovum;uncultured bacterium
g_test	chimney_activity	New.CleanUp.ReferenceOTU829988	26.5262	4.00844e-07	4	1.33137e-05	0	6.47675e-06	0.000287028	1.10601e-05	0	0	Bacteria;Proteobacteria;Epsilonproteobacteria;Campylobacterales;Helicobacteraceae;Sulfurovum;uncultured bacterium
g_test	chimney_activity	New.CleanUp.ReferenceOTU514357	26.4304	4.20214e-07	5	3.8039e-05	1.80841e-06	0.000125217	7.05806e-06	5.53005e-06	0	0	Bacteria;Proteobacteria;Epsilonproteobacteria;Campylobacterales;Helicobacteraceae;Sulfurovum;uncultured bacterium
g_test	chimney_activity	FN562906.1.1359	26.1079	4.95412e-07	4	7.6078e-06	0	0	1.41161e-05	0.000173275	0	3.2203e-05	Bacteria;Bacteroidetes;Flavobacteriia;Flavobacteriales;Flavobacteriaceae;uncultured Bacteroidetes bacterium;uncultured Bacteroidetes bacterium
g_test	chimney_activity	AY225614.1.1436	25.9871	5.26161e-07	4	6.27644e-05	9.76541e-05	1.94303e-05	3.29376e-05	0	0	0	Bacteria;Proteobacteria;Epsilonproteobacteria;Campylobacterales;Helicobacteraceae;Sulfurovum;uncultured epsilon proteobacterium
g_test	chimney_activity	KF545024.1.1481	25.6414	6.27851e-07	6	5.70585e-06	5.42523e-06	8.63567e-06	0.000242327	3.6867e-05	3.67321e-06	0	Bacteria;Proteobacteria;Epsilonproteobacteria;Campylobacterales;Helicobacteraceae;Sulfurovum;uncultured bacterium
g_test	chimney_activity	EU265970.1.1470	25.6064	6.37863e-07	6	0.000184489	0.000171799	0	0.000112929	4.79271e-05	1.8366e-06	1.61015e-05	Bacteria;Proteobacteria;Epsilonproteobacteria;Campylobacterales;Helicobacteraceae;Sulfurimonas;uncultured bacterium
g_test	chimney_activity	FJ628247.1.1501	24.859	9.37558e-07	5	3.8039e-06	0	0	0.000167041	2.02768e-05	5.50981e-06	4.83045e-05	Bacteria;Proteobacteria;Gammaproteobacteria;Oceanospirillales;SUP05 cluster;uncultured gamma proteobacterium;uncultured gamma proteobacterium
g_test	chimney_activity	New.ReferenceOTU242	23.2168	2.19471e-06	4	0.000239646	0	2.80659e-05	7.29333e-05	2.39635e-05	0	0	Bacteria;Bacteroidetes;Sphingobacteriia;Sphingobacteriales;WCHB1-69;uncultured bacterium;uncultured bacterium
g_test	chimney_activity	New.CleanUp.ReferenceOTU999189	23.1799	2.23192e-06	4	1.90195e-06	0	0	3.29376e-05	5.53005e-05	0	0.00053135	Bacteria;Bacteroidetes;Cytophagia;Cytophagales;Flammeovirgaceae;Reichenbachiella;uncultured bacterium
g_test	chimney_activity	New.ReferenceOTU2219	22.8938	2.58406e-06	5	1.52156e-05	1.80841e-06	0	9.41075e-06	0.000184335	1.46928e-05	0	Bacteria;Proteobacteria;Gammaproteobacteria;Thiotrichales;Piscirickettsiaceae;Thiomicrospira;uncultured gamma proteobacterium
g_test	chimney_activity	KF465246.1.1307	22.4716	3.21154e-06	4	0.000116019	1.80841e-05	2.15892e-06	1.64688e-05	0	0	0	Bacteria;Proteobacteria;Epsilonproteobacteria;Campylobacterales;Helicobacteraceae;Sulfurovum;uncultured bacterium
g_test	chimney_activity	New.CleanUp.ReferenceOTU342190	22.0141	4.0661e-06	4	1.33137e-05	0	4.31784e-06	0.000171746	6.63605e-05	0	0	Bacteria;Proteobacteria;Epsilonproteobacteria;Campylobacterales;Helicobacteraceae;Sulfurovum;uncultured epsilon proteobacterium
g_test	chimney_activity	EF218989.1.1378	21.868	4.37751e-06	4	3.8039e-06	0	6.47675e-06	0.000162335	4.42404e-05	0	0	Bacteria;Proteobacteria;Epsilonproteobacteria;Campylobacterales;Helicobacteraceae;Sulfurovum;uncultured bacterium
g_test	chimney_activity	AY548973.1.1343	21.1904	6.21847e-06	5	0.000182587	8.49953e-05	3.23838e-05	0.00103753	5.53005e-06	0	0	Bacteria;Proteobacteria;Epsilonproteobacteria;Campylobacterales;Campylobacteraceae;Sulfurospirillum;uncultured bacterium
g_test	chimney_activity	New.CleanUp.ReferenceOTU999629	21.1623	6.2956e-06	4	0	0	0	6.11698e-05	6.08305e-05	5.50981e-06	1.61015e-05	Bacteria;Proteobacteria;Alphaproteobacteria;Rhodobacterales;Rhodobacteraceae;Ruegeria
g_test	chimney_activity	AY225618.1.1425	20.7022	7.98646e-06	5	8.36858e-05	8.13784e-05	1.29535e-05	4.70537e-05	1.84335e-06	0	0	Bacteria;Proteobacteria;Epsilonproteobacteria;Campylobacterales;Helicobacteraceae;Sulfurovum;uncultured epsilon proteobacterium
g_test	chimney_activity	FR852967.1.1523	20.4833	8.93298e-06	4	4.94507e-05	0	6.69265e-05	4.70537e-06	1.84335e-06	0	0	Bacteria;Proteobacteria;Deltaproteobacteria;Desulfobacterales;Desulfobulbaceae;Desulfobulbus;uncultured bacterium
g_test	chimney_activity	JQ712421.1.1380	20.1451	1.06359e-05	5	6.46663e-05	4.52102e-05	1.07946e-05	0	9.21674e-06	1.8366e-06	0	Bacteria;Proteobacteria;Epsilonproteobacteria;Campylobacterales;Helicobacteraceae;Sulfurovum;uncultured epsilon proteobacterium
g_test	chimney_activity	New.CleanUp.ReferenceOTU522366	20.1236	1.07313e-05	4	0	0	0	9.41075e-06	6.82039e-05	3.30589e-05	1.61015e-05	Bacteria;Verrucomicrobia;Verrucomicrobiae;Verrucomicrobiales;DEV007;uncultured bacterium;uncultured bacterium
g_test	chimney_activity	HE576793.1.1403	19.7692	1.28876e-05	5	0.000517331	1.62757e-05	0	0.000181157	0.00107099	1.8366e-06	0	Bacteria;Bacteroidetes;Flavobacteriia;Flavobacteriales;Flavobacteriaceae;uncultured;uncultured Bacteroidetes bacterium
g_test	chimney_activity	DQ228645.1.1439	19.1475	1.78051e-05	4	1.90195e-06	0	0	9.41075e-06	0.000108758	0	3.2203e-05	Bacteria;Bacteroidetes;Flavobacteriia;Flavobacteriales;Flavobacteriaceae;uncultured;uncultured bacterium
g_test	chimney_activity	New.ReferenceOTU1354	17.6495	3.89935e-05	7	0.000152156	1.26589e-05	1.94303e-05	7.05806e-06	3.87103e-05	3.67321e-06	1.61015e-05	Bacteria;Proteobacteria;Epsilonproteobacteria;Campylobacterales;Helicobacteraceae;Sulfurovum;uncultured epsilon proteobacterium
g_test	chimney_activity	New.ReferenceOTU36	17.3631	4.52297e-05	5	0.000505919	1.98925e-05	8.63567e-05	0.000442305	4.79271e-05	0	0	Bacteria;BD1-5;uncultured bacterium;uncultured bacterium;uncultured bacterium;uncultured bacterium;uncultured bacterium
g_test	chimney_activity	New.CleanUp.ReferenceOTU495270	17.1017	5.17839e-05	4	5.89605e-05	1.44673e-05	8.63567e-06	2.35269e-06	0	0	0	Bacteria;Proteobacteria;Epsilonproteobacteria;Campylobacterales;Helicobacteraceae;Sulfurovum
g_test	chimney_activity	New.CleanUp.ReferenceOTU329652	16.6533	6.54359e-05	4	4.37449e-05	3.25514e-05	2.15892e-06	2.35269e-06	0	0	0	Bacteria;Proteobacteria;Epsilonproteobacteria;Campylobacterales;Helicobacteraceae;Sulfurimonas;uncultured bacterium
g_test	chimney_activity	New.ReferenceOTU2526	16.0449	8.99985e-05	4	9.69995e-05	5.42523e-06	0	2.35269e-06	9.21674e-06	0	0	Bacteria;Proteobacteria;Epsilonproteobacteria;Campylobacterales;Helicobacteraceae;Sulfurovum;uncultured bacterium
g_test	chimney_activity	New.CleanUp.ReferenceOTU29644	15.7035	0.000107548	4	3.8039e-06	0	0	6.11698e-05	6.08305e-05	1.8366e-06	0	Bacteria;Proteobacteria;Alphaproteobacteria;Rhodobacterales;Rhodobacteraceae
g_test	chimney_activity	New.ReferenceOTU494	15.3103	0.000132126	4	3.8039e-05	1.44673e-05	2.37481e-05	0	0	1.8366e-06	0	Bacteria;BD1-5;uncultured bacterium;uncultured bacterium;uncultured bacterium;uncultured bacterium;uncultured bacterium
g_test	chimney_activity	New.CleanUp.ReferenceOTU528763	15.2264	0.000137817	4	0	1.80841e-06	8.85156e-05	2.35269e-06	0	1.8366e-06	0	Bacteria;Proteobacteria;Epsilonproteobacteria;Nautiliales;Nautiliaceae;Nitratifractor;uncultured bacterium
g_test	chimney_activity	New.CleanUp.ReferenceOTU132971	15.0867	0.000148065	4	8.55878e-05	3.61682e-06	0	4.70537e-06	3.6867e-06	0	0	Bacteria;Proteobacteria;Gammaproteobacteria;Thiotrichales;Piscirickettsiaceae;Thiomicrospira;uncultured bacterium
g_test	chimney_activity	New.ReferenceOTU2436	14.791	0.000172809	4	6.27644e-05	1.08505e-05	4.31784e-06	4.70537e-06	0	0	0	Bacteria;Proteobacteria;Epsilonproteobacteria;Campylobacterales;Campylobacteraceae;Thiofractor;uncultured bacterium
g_test	chimney_activity	EU555124.1.1480	14.537	0.000197297	5	1.90195e-06	3.61682e-06	2.37481e-05	1.64688e-05	0.000167745	0	0	Bacteria;Proteobacteria;Gammaproteobacteria;Thiotrichales;Thiotrichaceae;uncultured;uncultured bacterium
g_test	chimney_activity	AJ441203.1.1422	14.0231	0.00025866	6	5.70585e-06	3.25514e-05	7.7721e-05	2.35269e-06	1.29034e-05	3.67321e-06	0	Bacteria;Proteobacteria;Epsilonproteobacteria;Campylobacterales;Helicobacteraceae;Sulfurovum;uncultured epsilon proteobacterium
g_test	chimney_activity	AB440164.1.1430	13.3692	0.000365585	6	2.28234e-05	5.42523e-06	2.15892e-06	0.000169393	4.79271e-05	1.8366e-06	0	Bacteria;Proteobacteria;Epsilonproteobacteria;Campylobacterales;Helicobacteraceae;Sulfurovum;uncultured bacterium
g_test	chimney_activity	New.ReferenceOTU1978	13.2052	0.000397228	5	3.8039e-06	1.80841e-06	6.47675e-06	6.35225e-05	7.55773e-05	0	0	Bacteria;Proteobacteria;Epsilonproteobacteria;Campylobacterales;Helicobacteraceae;Sulfurovum;uncultured bacterium
g_test	chimney_activity	GQ901061.1.1314	13.2052	0.000397228	5	0	9.04205e-06	2.15892e-06	0	4.97704e-05	5.69347e-05	0.000161015	Bacteria;Proteobacteria;Gammaproteobacteria;Alteromonadales;Idiomarinaceae;Idiomarina
g_test	chimney_activity	AY280434.1.1402	12.6365	0.000537097	4	5.70585e-06	4.34018e-05	1.29535e-05	0	1.84335e-06	0	0	Bacteria;Proteobacteria;Epsilonproteobacteria;Campylobacterales;Campylobacteraceae;Campylobacter;uncultured epsilon proteobacterium
g_test	chimney_activity	New.ReferenceOTU876	12.5113	0.000573037	4	0	0	0	2.35269e-06	4.97704e-05	1.8366e-06	0.000144914	Bacteria;Proteobacteria;Alphaproteobacteria;OCS116 clade;uncultured bacterium;uncultured bacterium;uncultured bacterium
g_test	chimney_activity	AY704397.1.1475	12.3199	0.000633495	4	2.66273e-05	0	2.15892e-06	7.29333e-05	0.000112444	0	0	Bacteria;Proteobacteria;Epsilonproteobacteria;Campylobacterales;Helicobacteraceae;Sulfurimonas;uncultured epsilon proteobacterium
g_test	chimney_activity	New.ReferenceOTU2000	11.9551	0.000768686	5	9.12936e-05	5.42523e-06	1.94303e-05	7.05806e-06	2.21202e-05	0	0	Bacteria;Proteobacteria;Epsilonproteobacteria;Campylobacterales;Helicobacteraceae;Sulfurovum;uncultured epsilon proteobacterium
g_test	chimney_activity	GQ848466.1.1517	11.8326	0.000819136	5	0.000106509	3.61682e-06	0	1.64688e-05	7.37339e-06	0	4.83045e-05	Bacteria;Proteobacteria;Gammaproteobacteria;Alteromonadales;Colwelliaceae;Colwellia;uncultured bacterium
g_test	chimney_activity	New.CleanUp.ReferenceOTU836964	10.608	0.00158125	4	1.90195e-06	1.80841e-06	0	8.2344e-05	1.65901e-05	0	0	Bacteria;Proteobacteria;Epsilonproteobacteria;Campylobacterales;Helicobacteraceae;Sulfurimonas
g_test	chimney_activity	New.CleanUp.ReferenceOTU93138	10.2017	0.00196622	4	1.90195e-06	0	0	2.11742e-05	5.16138e-05	1.8366e-06	0	Unassigned
g_test	chimney_activity	EF667896.1.1460	10.0926	0.0020815	4	0	0	0	7.05806e-06	1.29034e-05	2.75491e-05	9.6609e-05	Bacteria;Proteobacteria;Alphaproteobacteria;Rickettsiales;Rickettsiaceae;Rickettsia
g_test	chimney_activity	FJ535261.1.1343	9.98613	0.00220064	6	8.36858e-05	9.04205e-06	4.31784e-06	2.11742e-05	5.53005e-06	1.8366e-06	0	Bacteria;Proteobacteria;Epsilonproteobacteria;Campylobacterales;Helicobacteraceae;Sulfurovum;uncultured bacterium
g_test	chimney_activity	EU265791.1.1505	9.96101	0.00222607	4	3.8039e-06	0	2.15892e-06	6.11698e-05	3.6867e-05	0	0	Bacteria;Proteobacteria;Gammaproteobacteria;Thiotrichales;Thiotrichaceae;uncultured;uncultured bacterium
g_test	chimney_activity	New.ReferenceOTU618	9.91106	0.00228237	4	1.71176e-05	5.42523e-06	0	0.000141161	2.58069e-05	0	0	Bacteria;Bacteroidetes;Flavobacteriia;Flavobacteriales;Cryomorphaceae;Fluviicola
g_test	chimney_activity	New.ReferenceOTU1147	9.5419	0.00278408	4	9.50975e-06	1.80841e-06	0	9.41075e-05	2.76502e-05	0	0	Bacteria;Bacteroidetes;Flavobacteriia;Flavobacteriales;Flavobacteriaceae;Lutibacter;uncultured bacterium
g_test	chimney_activity	JF495273.1.1400	9.41725	0.00297345	5	0.000127431	7.23364e-06	8.63567e-06	2.35269e-05	3.87103e-05	0	0	Bacteria;Proteobacteria;Epsilonproteobacteria;Campylobacterales;Helicobacteraceae;Sulfurovum;uncultured bacterium
g_test	chimney_activity	AF354608.1.1499	9.17119	0.00339364	4	5.70585e-06	1.80841e-06	0	3.05849e-05	6.26739e-05	0	0	Bacteria;Proteobacteria;Gammaproteobacteria;Thiotrichales;Piscirickettsiaceae;Thiomicrospira;uncultured gamma proteobacterium
g_test	chimney_activity	New.CleanUp.ReferenceOTU1114162	9.04182	0.00363458	4	3.8039e-05	1.80841e-05	0	4.70537e-06	1.84335e-06	0	0	Bacteria;Proteobacteria;Epsilonproteobacteria;Campylobacterales;Helicobacteraceae;Sulfurimonas;uncultured bacterium
g_test	chimney_activity	AF367495.1.1329	8.91896	0.0038791	6	0.00373733	0.0078051	3.67016e-05	0.00611228	0.00929232	3.67321e-06	0	Bacteria;Proteobacteria;Epsilonproteobacteria;Campylobacterales;Helicobacteraceae;Sulfurimonas;uncultured epsilon proteobacterium
g_test	chimney_activity	GQ345764.1.1378	8.74263	0.00426355	6	1.90195e-06	0	2.15892e-06	1.88215e-05	2.94936e-05	2.38759e-05	1.61015e-05	Bacteria;Proteobacteria;Gammaproteobacteria;Oceanospirillales;SUP05 cluster;uncultured gamma proteobacterium;uncultured gamma proteobacterium
g_test	chimney_activity	GQ261792.1.1462	8.71214	0.00432625	4	0	0	0	1.41161e-05	3.31803e-05	1.8366e-06	3.2203e-05	Bacteria;Proteobacteria;Epsilonproteobacteria;Campylobacterales;Helicobacteraceae;Sulfurimonas;uncultured epsilon proteobacterium
g_test	chimney_activity	JN662291.1.1312	8.3702	0.00520929	5	4.56468e-05	1.80841e-06	2.15892e-06	2.35269e-06	1.84335e-06	0	0	Bacteria;Proteobacteria;Epsilonproteobacteria;Campylobacterales;Helicobacteraceae;Sulfurovum;uncultured bacterium
g_test	chimney_activity	JQ033738.1.1381	8.36352	0.00521744	4	6.84702e-05	3.61682e-06	0	1.64688e-05	1.84335e-06	0	0	Bacteria;Proteobacteria;Epsilonproteobacteria;Campylobacterales;Helicobacteraceae;Sulfurovum;uncultured epsilon proteobacterium
g_test	chimney_activity	JQ611102.1.1398	8.32592	0.00531534	5	0.000694212	0.000224243	2.15892e-06	0.000785797	0.000234105	0	0	Bacteria;Bacteroidetes;Flavobacteriia;Flavobacteriales;Flavobacteriaceae;Lutibacter;uncultured bacterium
g_test	chimney_activity	New.ReferenceOTU2588	8.27836	0.00544489	4	1.71176e-05	4.88271e-05	0	1.41161e-05	1.84335e-06	0	0	Bacteria;Proteobacteria;Epsilonproteobacteria;Campylobacterales;Helicobacteraceae;Sulfurovum;uncultured bacterium
g_test	chimney_activity	New.CleanUp.ReferenceOTU1134356	8.23507	0.00556463	4	3.42351e-05	5.42523e-06	4.31784e-06	0	0	1.8366e-06	0	Bacteria;Proteobacteria;Epsilonproteobacteria;Nautiliales;Nautiliaceae;Nitratifractor;uncultured bacterium
g_test	chimney_activity	New.ReferenceOTU2187	7.69568	0.00748079	5	9.31956e-05	1.80841e-06	0	7.05806e-06	1.29034e-05	0	0.000112711	Bacteria;Proteobacteria;Gammaproteobacteria;Alteromonadales;Colwelliaceae;Colwellia
g_test	chimney_activity	AY280413.1.1402	7.56736	0.00801561	5	2.47254e-05	0.000141056	0	7.29333e-05	3.13369e-05	3.67321e-06	0	Bacteria;BD1-5;uncultured bacterium;uncultured bacterium;uncultured bacterium;uncultured bacterium;uncultured bacterium
g_test	chimney_activity	New.ReferenceOTU1310	7.37071	0.00892216	6	0.00197422	0.000399659	4.31784e-06	0.000757565	0.00194842	3.67321e-06	0	Bacteria;Proteobacteria;Gammaproteobacteria;Thiotrichales;Piscirickettsiaceae;Thiomicrospira;uncultured gamma proteobacterium
g_test	chimney_activity	HQ691997.1.1360	7.3335	0.00908983	4	0	0	0	2.35269e-06	1.84335e-06	3.48955e-05	3.2203e-05	Bacteria;Proteobacteria;Alphaproteobacteria;Rickettsiales;Rickettsiaceae;Rickettsia
g_test	chimney_activity	AY531600.1.1460	7.12333	0.0101976	4	3.42351e-05	7.23364e-06	2.15892e-06	4.70537e-06	0	0	0	Bacteria;Proteobacteria;Epsilonproteobacteria;Campylobacterales;Helicobacteraceae;Sulfurovum;uncultured epsilon proteobacterium
g_test	chimney_activity	JQ712377.1.1376	6.85858	0.0117987	5	4.75488e-05	3.61682e-05	1.94303e-05	4.4701e-05	5.53005e-06	0	0	Bacteria;Proteobacteria;Epsilonproteobacteria;Campylobacterales;Helicobacteraceae;Sulfurovum;uncultured epsilon proteobacterium
g_test	chimney_activity	FJ712477.1.1480	6.74331	0.0125596	5	4.18429e-05	1.08505e-05	4.31784e-06	7.05806e-06	5.53005e-06	0	0	Bacteria;Proteobacteria;Epsilonproteobacteria;Campylobacterales;Helicobacteraceae;Sulfurovum;uncultured bacterium
g_test	chimney_activity	KF624439.1.1297	6.41876	0.0150406	5	0.00016547	0.000526247	6.47675e-06	0.000795208	3.87103e-05	0	0	Bacteria;Proteobacteria;Epsilonproteobacteria;Campylobacterales;Helicobacteraceae;Sulfurimonas;uncultured bacterium
g_test	chimney_activity	AB476174.1.1430	6.35592	0.0155505	5	1.90195e-06	1.80841e-06	4.31784e-06	7.76387e-05	7.37339e-06	0	0	Bacteria;Proteobacteria;Epsilonproteobacteria;Campylobacterales;Helicobacteraceae;Sulfurovum;uncultured bacterium
g_test	chimney_activity	New.CleanUp.ReferenceOTU178098	6.30134	0.0160037	4	0	0	0	2.35269e-06	2.02768e-05	1.28562e-05	1.61015e-05	Bacteria;Verrucomicrobia;Verrucomicrobiae;Verrucomicrobiales;DEV007;uncultured bacterium;uncultured bacterium
g_test	chimney_activity	FN554146.1.1471	6.23939	0.0165391	4	2.66273e-05	1.62757e-05	0	4.70537e-06	1.84335e-06	0	0	Bacteria;Proteobacteria;Epsilonproteobacteria;Campylobacterales;Helicobacteraceae;Sulfurimonas;uncultured bacterium
g_test	chimney_activity	New.CleanUp.ReferenceOTU774117	6.19667	0.0169085	4	9.12936e-05	1.80841e-06	0	2.58796e-05	1.65901e-05	0	0	Unassigned
g_test	chimney_activity	KF859552.1.1495	6.0932	0.0178906	6	3.8039e-06	0	8.63567e-06	2.35269e-06	3.87103e-05	2.57125e-05	9.6609e-05	Bacteria;Proteobacteria;Gammaproteobacteria;Oceanospirillales;Halomonadaceae;Halomonas;uncultured Halomonas sp,
g_test	chimney_activity	New.ReferenceOTU360	5.93358	0.0195445	5	8.36858e-05	3.61682e-06	0	9.88128e-05	0.000151155	7.34642e-06	0	Bacteria;Proteobacteria;Gammaproteobacteria;Thiotrichales;Piscirickettsiaceae;Thiomicrospira;uncultured gamma proteobacterium
g_test	chimney_activity	AJ441205.1.1430	5.84966	0.0204567	4	3.04312e-05	1.80841e-06	1.07946e-05	7.05806e-06	0	0	0	Bacteria;Proteobacteria;Epsilonproteobacteria;Campylobacterales;Helicobacteraceae;Sulfurovum;uncultured bacterium
g_test	chimney_activity	FN553958.1.1484	5.55383	0.0241632	5	0.00038039	0.000132014	1.29535e-05	0.00103283	0.000134564	0	0	Bacteria;Proteobacteria;Epsilonproteobacteria;Campylobacterales;Helicobacteraceae;Sulfurimonas
g_test	chimney_activity	JN662200.1.1387	5.49359	0.024959	4	2.28234e-05	1.80841e-06	1.29535e-05	4.70537e-06	0	0	0	Bacteria;Proteobacteria;Epsilonproteobacteria;Campylobacterales;Helicobacteraceae;Sulfurovum;uncultured bacterium
g_test	chimney_activity	AM990660.1.1353	5.43171	0.0258064	5	1.90195e-06	0	2.15892e-06	0	2.02768e-05	2.20393e-05	6.4406e-05	Bacteria;Bacteroidetes;Flavobacteriia;Flavobacteriales;Flavobacteriaceae;Mesonia
g_test	chimney_activity	GU369923.1.1384	5.27844	0.0281207	4	1.90195e-06	0	6.47675e-06	5.64645e-05	1.65901e-05	0	0	Bacteria;Proteobacteria;Epsilonproteobacteria;Campylobacterales;Helicobacteraceae;Sulfurovum;uncultured epsilon proteobacterium
g_test	chimney_activity	AY531594.1.1459	5.21993	0.0290238	5	3.23332e-05	9.04205e-06	4.31784e-06	0.000167041	1.65901e-05	0	0	Bacteria;Proteobacteria;Epsilonproteobacteria;Campylobacterales;Helicobacteraceae;Sulfurovum;uncultured bacterium
g_test	chimney_activity	New.CleanUp.ReferenceOTU367834	5.08059	0.0313856	4	3.61371e-05	0	2.15892e-06	2.35269e-06	3.6867e-06	0	0	Bacteria;Proteobacteria;Epsilonproteobacteria;Campylobacterales;Helicobacteraceae;Sulfurimonas;uncultured bacterium
g_test	chimney_activity	AF420351.1.1472	5.01482	0.0325346	4	0	0	2.80659e-05	5.88172e-05	3.87103e-05	0	0.000144914	Bacteria;Proteobacteria;Epsilonproteobacteria;Campylobacterales;Helicobacteraceae;Sulfurovum;uncultured bacterium
g_test	chimney_activity	JQ678423.1.1356	4.85171	0.0356123	5	0	0	4.31784e-06	7.05806e-06	1.10601e-05	5.50981e-06	0.00020932	Bacteria;Proteobacteria;Gammaproteobacteria;Oceanospirillales;SUP05 cluster;uncultured bacterium;uncultured bacterium
g_test	chimney_activity	JF738106.1.1522	4.85171	0.0356123	4	0	1.80841e-06	2.15892e-06	3.99957e-05	1.47468e-05	0	0	Bacteria;Proteobacteria;Zetaproteobacteria;Mariprofundales;Mariprofundaceae;Mariprofundus;uncultured bacterium
g_test	chimney_activity	New.CleanUp.ReferenceOTU396210	4.81012	0.036409	4	2.28234e-05	1.80841e-06	0	5.64645e-05	5.53005e-05	0	0	Bacteria;Proteobacteria;Gammaproteobacteria;Thiotrichales;Piscirickettsiaceae;Thiomicrospira;uncultured gamma proteobacterium
g_test	chimney_activity	New.CleanUp.ReferenceOTU15196	4.78624	0.0367708	4	0	0	2.15892e-06	3.99957e-05	1.84335e-06	0	4.83045e-05	Bacteria;Bacteroidetes;Flavobacteriia;Flavobacteriales;Flavobacteriaceae;Ulvibacter;uncultured Bacteroidetes bacterium
g_test	chimney_activity	AJ535225.1.1405	4.78624	0.0367708	4	1.90195e-06	0	0	7.05806e-06	2.39635e-05	0	8.05075e-05	Bacteria;Bacteroidetes;Flavobacteriia;Flavobacteriales;Flavobacteriaceae;uncultured
g_test	chimney_activity	New.ReferenceOTU1930	4.63906	0.0399779	5	2.85293e-05	3.61682e-06	0	3.99957e-05	7.55773e-05	7.34642e-06	0	Bacteria;Proteobacteria;Gammaproteobacteria;Thiotrichales;Piscirickettsiaceae;Thiomicrospira;uncultured gamma proteobacterium
g_test	chimney_activity	New.CleanUp.ReferenceOTU695425	4.61925	0.0403623	4	9.50975e-05	1.80841e-06	0	5.17591e-05	0.000195395	0	0	Bacteria;Bacteroidetes;Flavobacteriia;Flavobacteriales;Cryomorphaceae;Owenweeksia;uncultured bacterium
g_test	chimney_activity	New.CleanUp.ReferenceOTU522248	4.587	0.0410475	4	0	0	0	1.41161e-05	1.10601e-05	3.67321e-06	1.61015e-05	Unassigned
g_test	chimney_activity	JQ032048.1.1222	4.47981	0.0436146	4	0	0	2.15892e-06	0	9.21674e-06	2.38759e-05	3.2203e-05	Bacteria;Proteobacteria;Gammaproteobacteria;Alteromonadales;Idiomarinaceae;Idiomarina
g_test	chimney_activity	New.CleanUp.ReferenceOTU654657	4.45999	0.0440367	7	3.9941e-05	1.80841e-06	1.29535e-05	7.05806e-06	5.53005e-06	3.67321e-06	1.61015e-05	Bacteria;Proteobacteria;Epsilonproteobacteria;Campylobacterales;Helicobacteraceae;Sulfurovum;uncultured epsilon proteobacterium
g_test	chimney_activity	New.CleanUp.ReferenceOTU275937	4.4038	0.0454214	4	2.85293e-05	9.04205e-06	0	7.05806e-06	0	1.8366e-06	0	Bacteria;Proteobacteria;Epsilonproteobacteria;Campylobacterales;Helicobacteraceae;Sulfurovum;uncultured bacterium
g_test	chimney_activity	New.CleanUp.ReferenceOTU958895	4.3927	0.0456284	4	1.71176e-05	3.61682e-06	6.47675e-06	0	1.84335e-06	0	0	Bacteria;Proteobacteria;Epsilonproteobacteria;Campylobacterales;Helicobacteraceae;Sulfurovum;uncultured bacterium
g_test	chimney_activity	JQ712385.1.1383	4.35013	0.0466912	4	3.8039e-06	1.08505e-05	0	8.94021e-05	3.6867e-06	0	0	Bacteria;Proteobacteria;Epsilonproteobacteria;Campylobacterales;Helicobacteraceae;Sulfurimonas;uncultured bacterium
g_test	chimney_activity	New.ReferenceOTU1467	4.28304	0.0484745	4	0.000116019	9.04205e-06	0	7.05806e-05	0.000224889	0	0	Bacteria;Bacteroidetes;Flavobacteriia;Flavobacteriales;Flavobacteriaceae;uncultured;uncultured Bacteroidetes bacterium
g_test	chimney_activity	New.CleanUp.ReferenceOTU52031	4.25008	0.0493279	4	0.000270077	0.000213392	0	3.52903e-05	0.000827664	0	0	Bacteria;BD1-5;uncultured bacterium;uncultured bacterium;uncultured bacterium;uncultured bacterium;uncultured bacterium
chimney_activity = active chimneys vs. inactive chimneys

## Sheet: Arc chimney activity
Supplementary Table S5: significant differences between counts in distinct bacterial and archaeal groups found in relation to habitat types.
						active chimneys			inactive chimneys
Test	Variable	#OTU ID	Test-Statistic	FDR_P	n_sites	AS5	AS6	AS8	AS7	AS1	AS4	taxonomy
g_test	chimney_activity	FJ487519.1.1341	165891	0	4	0	2.47696e-06	7.19512e-06	0	0.058395	0.928792	Archaea; Thaumarchaeota; Marine Group I; Unknown Order; Unknown Family; Candidatus Nitrosopumilus; Ambiguous_taxa
g_test	chimney_activity	AB095131.1.1049	160583	0	5	0.549196	0.358953	0.0489988	0.000788693	0.00130826	0	Archaea; Euryarchaeota; Archaeoglobi; Archaeoglobales; Archaeoglobaceae; uncultured
g_test	chimney_activity	New.ReferenceOTU2259	124540	0	6	0.000350998	0.000156048	0.000194268	0.574293	0.144796	1.31999e-05	Unassigned
g_test	chimney_activity	FR852956.1.939	80386.2	0	5	0.00190785	0.333545	0.226636	0.00320223	0.0208836	0	Archaea; Crenarchaeota; Thermoprotei; Desulfurococcales; Desulfurococcaceae; uncultured; uncultured archaeon
g_test	chimney_activity	AB980092.1.1440	49015.1	0	6	0.00013587	5.44931e-05	7.91464e-05	0.239281	0.00941621	2.63998e-06	Bacteria; Actinobacteria; Acidimicrobiia; Acidimicrobiales; uncultured; uncultured bacterium; uncultured bacterium
g_test	chimney_activity	JQ678255.1.951	39011.9	0	5	0.067386	0.149232	0.00432427	0.00016949	3.23026e-05	0	Archaea; Euryarchaeota; Thermococci; Thermococcales; Thermococcaceae; Thermococcus; uncultured archaeon
g_test	chimney_activity	FR852944.1.922	22417.7	0	5	0.0192738	0.0410358	0.10606	0.000623723	0.00290723	0	Archaea; Euryarchaeota; Thermococci; Thermococcales; Thermococcaceae; Thermococcus; uncultured archaeon
g_test	chimney_activity	New.ReferenceOTU812	16022.4	0	5	4.81207e-05	2.22926e-05	7.19512e-06	0.0693734	0.0345396	0	Unassigned
g_test	chimney_activity	New.ReferenceOTU2137	14930.4	0	4	0	0	3.59756e-06	0.000772874	0.258251	1.58399e-05	Unassigned
g_test	chimney_activity	JX507278.1.921	13307	0	5	0.0836055	0.000428514	0.000625976	4.97171e-05	0.000880246	0	Archaea; Euryarchaeota; Thermoplasmata; Thermoplasmatales; Deep Sea Hydrothermal Vent Gp 2(DHVEG-2); Ambiguous_taxa; Ambiguous_taxa
g_test	chimney_activity	AB095117.1.953	11610.4	0	5	8.4919e-05	0.00139453	0.0924322	0.000237286	0.000331102	0	Archaea; Euryarchaeota; Methanococci; Methanococcales; Methanocaldococcaceae; Methanocaldococcus; Ambiguous_taxa
g_test	chimney_activity	FJ150826.1.1353	10345.3	0	4	2.83063e-06	0	0	2.25987e-06	0.00376325	0.0579132	Archaea; Thaumarchaeota; Marine Group I; Unknown Order; Unknown Family; Candidatus Nitrosopumilus; Ambiguous_taxa
g_test	chimney_activity	New.ReferenceOTU1646	10044.1	0	5	0.000251926	7.43087e-06	0.0784269	2.25987e-05	3.23026e-05	0	Unassigned
g_test	chimney_activity	New.ReferenceOTU2803	9663.72	0	5	0.0594433	5.20161e-05	2.87805e-05	1.58191e-05	2.4227e-05	0	Unassigned
g_test	chimney_activity	AB175587.1.979	8807.64	0	6	0.00035949	0.0260031	0.0575034	0.00124745	0.00918202	5.27996e-06	Archaea; Euryarchaeota; Archaeoglobi; Archaeoglobales; Archaeoglobaceae; Archaeoglobus
g_test	chimney_activity	New.ReferenceOTU1975	7929.85	0	4	0.048769	2.97235e-05	1.07927e-05	1.58191e-05	0	0	Archaea; Woesearchaeota (DHVEG-6); Ambiguous_taxa; Ambiguous_taxa; Ambiguous_taxa; Ambiguous_taxa; Ambiguous_taxa
g_test	chimney_activity	FR852950.1.924	7840.13	0	5	0.0277034	0.000795104	0.0391739	0.000244066	0.00533801	0	Archaea; Euryarchaeota; Thermoplasmata; Thermoplasmatales; Deep Sea Hydrothermal Vent Gp 2(DHVEG-2); uncultured archaeon; uncultured archaeon
g_test	chimney_activity	AB293244.1.1335	7681.39	0	5	1.41532e-05	0.027301	0.0213443	5.19769e-05	0.000104983	0	Archaea; Crenarchaeota; Thermoprotei; Thermoproteales; Thermoproteaceae; uncultured
g_test	chimney_activity	New.ReferenceOTU3339	5129.11	0	5	5.66126e-06	2.47696e-06	0	0.0239003	0.00453044	2.63998e-06	Unassigned
g_test	chimney_activity	New.ReferenceOTU2020	5012.69	0	6	1.41532e-05	1.73387e-05	7.19512e-06	0.0238868	0.00337562	5.27996e-06	Unassigned
g_test	chimney_activity	AB095133.1.1040	4691.61	0	4	1.69838e-05	0.017792	0.0125159	0.000149151	0	0	Archaea; Miscellaneous Euryarchaeotic Group(MEG); uncultured archaeon; uncultured archaeon; uncultured archaeon; uncultured archaeon; uncultured archaeon
g_test	chimney_activity	AB095120.1.1050	4598.18	0	5	8.4919e-06	2.47696e-06	0.0393537	0.000106214	0.000823717	0	Archaea; Euryarchaeota; Methanococci; Methanococcales; Methanococcaceae; uncultured; uncultured archaeon
g_test	chimney_activity	New.ReferenceOTU2610	4409.72	0	4	5.66126e-06	2.47696e-06	0.0344934	9.03947e-06	0	0	Unassigned
g_test	chimney_activity	AB057722.1.1392	4382.34	0	5	8.4919e-06	9.90783e-06	0.0391127	0.000431635	0.000331102	0	Archaea; Euryarchaeota; Methanococci; Methanococcales; Methanococcaceae; Methanothermococcus
g_test	chimney_activity	New.ReferenceOTU852	4281.75	0	4	0	2.47696e-06	0	0.000225987	0.0741183	7.91993e-06	Unassigned
g_test	chimney_activity	FR852947.1.923	4164.18	0	5	0.0299085	0.00280887	0.00107927	0.00016497	0.00451429	0	Archaea; Euryarchaeota; Thermococci; Thermococcales; Thermococcaceae; Thermococcus
g_test	chimney_activity	New.ReferenceOTU238	3748.37	0	4	5.66126e-06	0	0	0.00539656	0.0464269	2.63998e-06	Unassigned
g_test	chimney_activity	New.ReferenceOTU1643	3469.99	0	5	8.4919e-06	0	3.59756e-06	0.00381239	0.0473799	5.27996e-06	Unassigned
g_test	chimney_activity	New.ReferenceOTU2252	2773.55	0	5	1.13225e-05	0	3.59756e-06	0.0110033	0.0095858	2.63998e-06	Unassigned
g_test	chimney_activity	New.ReferenceOTU1983	2586.16	0	4	0	4.95392e-06	3.59756e-06	0.0112632	0.00523302	0	Unassigned
g_test	chimney_activity	HQ636027.1.905	2519.75	0	5	1.98144e-05	2.47696e-06	0.020337	6.7796e-06	0.000177664	0	Archaea; Crenarchaeota; Thermoprotei; Fervidicoccales; Fervidicoccaceae; uncultured
g_test	chimney_activity	New.ReferenceOTU3376	2362.68	0	5	2.83063e-06	2.47696e-06	3.59756e-06	0.00910952	0.0090205	0	Unassigned
g_test	chimney_activity	DQ082935.1.1036	2251.95	0	5	0.0158176	2.47696e-06	3.59756e-06	0.000122033	0.000524917	0	Archaea; Euryarchaeota; Thermoplasmata; Thermoplasmatales; AMOS1A-4113-D04; uncultured archaeon; uncultured archaeon
g_test	chimney_activity	DQ228529.1.1198	2196.25	0	5	2.83063e-06	5.20161e-05	0.0180274	4.51973e-06	0.000282648	0	Archaea; Crenarchaeota; Thermoprotei; Desulfurococcales; Desulfurococcaceae; uncultured; uncultured archaeon
g_test	chimney_activity	New.ReferenceOTU1485	2147.58	0	5	0.00585375	0.00140939	0.008555	0.000108474	3.23026e-05	0	Archaea; Nanoarchaeota; Nanoarchaeota Incertae Sedis; Unknown Order; Unknown Family; Nanoarchaeum; uncultured nanoarchaeote
g_test	chimney_activity	AB247822.1.918	1799.16	0	5	0.0143173	5.20161e-05	0.000107927	5.87565e-05	0.0018251	0	Archaea; Euryarchaeota; Thermoplasmata; Thermoplasmatales; Deep Sea Hydrothermal Vent Gp 2(DHVEG-2); Ambiguous_taxa; Ambiguous_taxa
g_test	chimney_activity	AB019735.1.1417	1769.61	0	5	0.00655291	0.00543692	0.000920976	9.49144e-05	0.00111444	0	Archaea; Euryarchaeota; Archaeoglobi; Archaeoglobales; Archaeoglobaceae; Archaeoglobus
g_test	chimney_activity	New.ReferenceOTU1894	1760.62	0	4	0.00212297	0	0	0.00112767	0.0488254	5.27996e-06	Unassigned
g_test	chimney_activity	New.ReferenceOTU1583	1731.42	0	5	2.83063e-06	2.47696e-06	0	0.0051073	0.0121942	2.63998e-06	Unassigned
g_test	chimney_activity	AB095134.1.1060	1658.24	0	4	5.66126e-06	0	0.0145126	0.000133332	9.69078e-05	0	Archaea; Euryarchaeota; Methanococci; Methanococcales; Methanococcaceae; Methanothermococcus
g_test	chimney_activity	AB235337.1.942	1621.48	0	5	0.000232112	0.00256117	0.015027	0.000944624	0.00012921	0	Archaea; Crenarchaeota; Thermoprotei; Thermoproteales; Thermofilaceae; Thermofilum; uncultured Thermoproteales archaeon
g_test	chimney_activity	New.ReferenceOTU3289	1550.86	0	5	2.83063e-06	4.95392e-06	0.0125411	3.3898e-05	8.07565e-06	0	Unassigned
g_test	chimney_activity	FR852931.1.939	1450.98	0	5	3.39676e-05	0.00271227	0.00875647	0.000131072	4.84539e-05	0	Archaea; Crenarchaeota; Thermoprotei; Desulfurococcales; Desulfurococcaceae
g_test	chimney_activity	JQ221004.1.915	1377.31	0	6	0.00320144	9.66014e-05	7.55488e-05	4.29375e-05	0.0466127	0.00212518	Archaea; Thaumarchaeota; Marine Group I
g_test	chimney_activity	New.ReferenceOTU3235	1348.68	0	4	0.00845793	9.90783e-06	0	2.25987e-06	5.65296e-05	0	Archaea; Euryarchaeota; Thermococci; Thermococcales; Thermococcaceae; Palaeococcus; Ambiguous_taxa
g_test	chimney_activity	FR852925.1.919	1257.16	0	5	0.000141532	0.000319528	0.0120662	5.42368e-05	0.00114674	0	Archaea; Crenarchaeota; Thermoprotei; Desulfurococcales
g_test	chimney_activity	AB629609.1.935	1255.95	0	5	1.69838e-05	2.72465e-05	0.0125447	0.000350279	3.23026e-05	0	Archaea; Crenarchaeota; Thermoprotei; Desulfurococcales; Desulfurococcaceae; Ignisphaera
g_test	chimney_activity	New.ReferenceOTU1764	1232.78	0	5	0.00781821	6.44009e-05	3.59756e-06	2.25987e-06	0.000113059	0	Unassigned
g_test	chimney_activity	AY251065.1.1426	1138.36	0	5	0.00832206	3.96313e-05	7.55488e-05	2.25987e-05	0.000678355	0	Archaea; Euryarchaeota; Thermoplasmata; Thermoplasmatales; Deep Sea Hydrothermal Vent Gp 2(DHVEG-2); Ambiguous_taxa; Ambiguous_taxa
g_test	chimney_activity	JF935168.1.1350	1103.8	0	4	0.00687844	7.43087e-06	1.43902e-05	0	4.03783e-05	0	Archaea; Euryarchaeota; Thermococci; Thermococcales; Thermococcaceae; Palaeococcus; Ambiguous_taxa
g_test	chimney_activity	DQ228530.1.1443	1060.02	0	5	2.83063e-06	0.000208064	0.00837153	2.25987e-06	0.000113059	0	Archaea; Crenarchaeota; Thermoprotei; Desulfurococcales; Desulfurococcaceae; uncultured; Ambiguous_taxa
g_test	chimney_activity	New.ReferenceOTU2562	984.137	0	4	5.66126e-06	0	3.59756e-06	0.00468696	0.000702582	0	Unassigned
g_test	chimney_activity	JQ220653.1.915	972.139	0	6	0.00173801	3.22005e-05	5.7561e-05	0.000155931	0.0303725	0.000968872	Archaea; Thaumarchaeota; Marine Group I
g_test	chimney_activity	KP091000.1.1463	960.938	0	4	0	0.00216238	0.00570933	0.000135592	5.65296e-05	0	Archaea; Euryarchaeota; Archaeoglobi; Archaeoglobales; Archaeoglobaceae; Archaeoglobus
g_test	chimney_activity	New.ReferenceOTU2786	940.401	0	4	2.83063e-06	0	0	0.0043299	0.00105791	2.63998e-06	Unassigned
g_test	chimney_activity	KJ622296.1.1446	938.471	0	5	2.83063e-06	0.00222679	0.00510134	9.49144e-05	4.03783e-05	0	Archaea; Euryarchaeota; Archaeoglobi; Archaeoglobales; Archaeoglobaceae; Archaeoglobus
g_test	chimney_activity	FJ487499.1.1366	830.379	0	4	0	2.47696e-06	3.59756e-06	0	0.00037148	0.00468068	Archaea; Thaumarchaeota; Marine Group I; Unknown Order; Unknown Family; Candidatus Nitrosopumilus; Ambiguous_taxa
g_test	chimney_activity	JQ221333.1.916	815.566	0	6	0.00146627	0.000141187	3.95732e-05	9.03947e-06	0.0279337	0.000446156	Archaea; Thaumarchaeota; Marine Group I; uncultured marine archaeon; uncultured marine archaeon; uncultured marine archaeon; uncultured marine archaeon
g_test	chimney_activity	AB611366.1.906	782.393	0	5	0.00222771	0.000693548	0.0027989	4.74572e-05	8.07565e-06	0	Archaea; Nanoarchaeota; Nanoarchaeota Incertae Sedis; Unknown Order; Unknown Family; Nanoarchaeum; uncultured nanoarchaeote
g_test	chimney_activity	New.ReferenceOTU2272	750.502	0	5	1.41532e-05	0.00036659	0.00564817	1.12993e-05	6.46052e-05	0	Archaea; Nanoarchaeota; Nanoarchaeota Incertae Sedis; Unknown Order; Unknown Family; Nanoarchaeum; uncultured nanoarchaeote
g_test	chimney_activity	AF068819.1.1419	730.315	0	4	0.00236924	0.00171406	0.000230244	2.25987e-06	0	0	Archaea; Euryarchaeota; Archaeoglobi; Archaeoglobales; Archaeoglobaceae; uncultured
g_test	chimney_activity	New.ReferenceOTU3454	691.362	0	5	1.69838e-05	0.0029129	0.00188153	2.48585e-05	0.00018574	0	Archaea; Crenarchaeota; Thermoprotei; Desulfurococcales; Desulfurococcaceae; uncultured; uncultured archaeon
g_test	chimney_activity	EU559691.1.933	677.495	0	4	0	0.000183295	0.0051697	2.25987e-06	3.23026e-05	0	Archaea; Crenarchaeota; Thermoprotei; Desulfurococcales; Desulfurococcaceae; uncultured; uncultured archaeon
g_test	chimney_activity	KP091001.1.1481	562.825	0	5	5.66126e-06	0.001397	0.00301476	6.10164e-05	3.23026e-05	0	Archaea; Euryarchaeota; Archaeoglobi; Archaeoglobales; Archaeoglobaceae; Archaeoglobus
g_test	chimney_activity	AJ567653.1.908	542.593	0	4	0	2.47696e-06	3.59756e-06	0	0.00125173	0.00274558	Archaea; Thaumarchaeota; Marine Group I; Unknown Order; Unknown Family; Candidatus Nitrosopumilus; Ambiguous_taxa
g_test	chimney_activity	FR852915.1.920	515.525	0	4	0	0	8.99391e-05	2.25987e-06	0.0102399	2.63998e-06	Archaea; Euryarchaeota; Thermoplasmata; Thermoplasmatales; 20c-4
g_test	chimney_activity	AB193988.1.1441	510.655	0	6	0.00108979	0.000193203	3.59756e-05	1.80789e-05	0.0167166	0.00115631	Archaea; Thaumarchaeota; Marine Group I
g_test	chimney_activity	New.CleanUp.ReferenceOTU704463	479.137	0	5	0.000249096	0.000577131	0.00392134	0.000151411	0.000113059	0	Unassigned
g_test	chimney_activity	New.ReferenceOTU1002	472.57	0	5	0.00157383	0.0011394	0.000176281	9.03947e-06	8.07565e-06	0	Archaea; Euryarchaeota; Archaeoglobi; Archaeoglobales; Archaeoglobaceae; uncultured
g_test	chimney_activity	EU428002.1.942	449.653	0	4	1.98144e-05	0.00112949	0.00203262	1.58191e-05	0	0	Archaea; Crenarchaeota; Thermoprotei; Desulfurococcales; Pyrodictiaceae
g_test	chimney_activity	New.ReferenceOTU1784	438.216	0	4	0.00283346	4.95392e-06	0	2.25987e-06	4.84539e-05	0	Unassigned
g_test	chimney_activity	New.ReferenceOTU1087	389.552	0	5	8.4919e-06	0.000190726	0.00303994	2.03388e-05	2.4227e-05	0	Unassigned
g_test	chimney_activity	AM749992.1.1368	374.883	0	4	0.000317031	0.00415881	0	8.13552e-05	0.00230964	0	Archaea; Euryarchaeota; Thermoplasmata; Thermoplasmatales; AMOS1A-4113-D04; uncultured archaeon; uncultured archaeon
g_test	chimney_activity	New.ReferenceOTU1533	361.777	0	5	0.00262683	1.73387e-05	1.43902e-05	1.12993e-05	0.00018574	0	Archaea; Euryarchaeota; Thermoplasmata; Thermoplasmatales; Deep Sea Hydrothermal Vent Gp 2(DHVEG-2); Ambiguous_taxa; Ambiguous_taxa
g_test	chimney_activity	New.CleanUp.ReferenceOTU1314845	338.382	0	4	5.66126e-06	0	3.59756e-06	0.000314121	0.0050069	0	Unassigned
g_test	chimney_activity	New.ReferenceOTU3381	316.792	0	4	5.09514e-05	2.47696e-06	0.00249311	6.7796e-06	0	0	Unassigned
g_test	chimney_activity	New.ReferenceOTU1753	306.292	0	4	0.000840698	0.000183295	0.00111884	4.51973e-06	0	0	Archaea; Nanoarchaeota; Nanoarchaeota Incertae Sedis; Unknown Order; Unknown Family; Nanoarchaeum; uncultured nanoarchaeote
g_test	chimney_activity	New.ReferenceOTU247	298.224	0	4	0.00201824	4.95392e-05	0	2.25987e-06	0.000104983	0	Unassigned
g_test	chimney_activity	New.ReferenceOTU2278	274.855	0	4	0.0018116	1.23848e-05	0	4.51973e-06	4.03783e-05	0	Unassigned
g_test	chimney_activity	KM221248.1.942	262.855	0	5	8.4919e-06	0.000527592	0.00202903	8.36151e-05	7.26809e-05	0	Archaea; Crenarchaeota; Thermoprotei; Desulfurococcales; Desulfurococcaceae
g_test	chimney_activity	New.ReferenceOTU584	253.752	0	4	2.83063e-06	0.00099326	0.000726708	0	6.46052e-05	0	Unassigned
g_test	chimney_activity	GM015171.2023506.2024981	246.407	0	5	0.000730303	0.000735657	3.59756e-05	2.25987e-06	2.4227e-05	0	Archaea; Euryarchaeota; Thermococci; Thermococcales; Thermococcaceae; Thermococcus; uncultured archaeon
g_test	chimney_activity	AB293231.1.1321	239.281	0	5	0.00114074	3.71544e-05	0.00198226	4.51973e-06	0.00104983	0	Archaea; Euryarchaeota; Thermoplasmata; Thermoplasmatales; Deep Sea Hydrothermal Vent Gp 2(DHVEG-2)
g_test	chimney_activity	New.ReferenceOTU1088	184.11	0	4	0.000390627	0.000106509	0.000820244	2.25987e-06	0	0	Archaea; Nanoarchaeota; Nanoarchaeota Incertae Sedis; Unknown Order; Unknown Family; Nanoarchaeum; uncultured nanoarchaeote
g_test	chimney_activity	JQ220612.1.914	183.843	0	4	5.66126e-06	2.47696e-06	0	0	0.00209967	0.000427676	Archaea; Thaumarchaeota; Marine Group I; Ambiguous_taxa; Ambiguous_taxa; Ambiguous_taxa; Ambiguous_taxa
g_test	chimney_activity	New.ReferenceOTU2098	166.738	0	5	8.4919e-06	0.000725749	0.000431707	9.03947e-06	4.03783e-05	0	Archaea; Crenarchaeota; Thermoprotei; Desulfurococcales; Desulfurococcaceae; uncultured; uncultured archaeon
g_test	chimney_activity	New.ReferenceOTU560	163.94	0	4	0.00176348	8.66935e-05	0	1.58191e-05	0.000654128	0	Unassigned
g_test	chimney_activity	New.ReferenceOTU2297	163.856	0	4	0.00101903	7.43087e-06	7.19512e-06	0	8.07565e-06	0	Unassigned
g_test	chimney_activity	New.ReferenceOTU3041	140.918	0	4	2.83063e-06	0	0.0011764	2.25987e-06	1.61513e-05	0	Unassigned
g_test	chimney_activity	New.ReferenceOTU1319	136.36	0	5	2.83063e-06	6.93548e-05	0.0010397	2.25987e-06	1.61513e-05	0	Unassigned
g_test	chimney_activity	AB095129.1.1070	135.498	0	6	0.000144362	0.000250173	0.000647561	4.51973e-06	2.4227e-05	2.63998e-06	Archaea; Euryarchaeota; Thermococci; Thermococcales; Thermococcaceae; Thermococcus; uncultured archaeon
g_test	chimney_activity	New.ReferenceOTU3389	133.982	0	4	0	4.95392e-06	0.000888598	2.03388e-05	0.00729231	0	Archaea; Euryarchaeota; Thermoplasmata; Thermoplasmatales; 20c-4; uncultured euryarchaeote; uncultured euryarchaeote
g_test	chimney_activity	New.ReferenceOTU1246	127.384	0	5	8.4919e-06	0.000520161	0.000345366	6.7796e-06	1.61513e-05	0	Archaea; Crenarchaeota; Thermoprotei; Desulfurococcales; Desulfurococcaceae; uncultured; uncultured archaeon
g_test	chimney_activity	AB301877.1.932	126.3	0	6	7.92577e-05	7.18318e-05	0.000647561	6.7796e-06	0.00694506	2.63998e-06	Archaea; Euryarchaeota; Archaeoglobi; Archaeoglobales; Archaeoglobaceae; uncultured; uncultured archaeon
g_test	chimney_activity	AF068814.1.1423	126.113	0	4	5.66126e-06	0	0.00107567	2.25987e-06	2.4227e-05	0	Archaea; Euryarchaeota; Archaeoglobi; Archaeoglobales; Archaeoglobaceae; Archaeoglobus
g_test	chimney_activity	New.ReferenceOTU3365	125.66	0	4	0	0.000544931	0.000287805	2.25987e-06	2.4227e-05	0	Archaea; Crenarchaeota; Thermoprotei; Desulfurococcales; Desulfurococcaceae; uncultured; uncultured archaeon
g_test	chimney_activity	New.CleanUp.ReferenceOTU900806	121.12	0	5	2.83063e-06	0.000535023	0.000298598	6.7796e-06	2.4227e-05	0	Archaea; Crenarchaeota; Thermoprotei; Desulfurococcales; Desulfurococcaceae; uncultured; uncultured archaeon
g_test	chimney_activity	EU428004.1.940	100.761	0	5	5.66126e-06	1.73387e-05	0.00102531	1.12993e-05	8.88322e-05	0	Archaea; Crenarchaeota; Thermoprotei; Desulfurococcales
g_test	chimney_activity	New.ReferenceOTU3450	88.6341	0	4	0	0.000312097	0.000330976	2.25987e-06	2.4227e-05	0	Archaea; Crenarchaeota; Thermoprotei; Desulfurococcales; Desulfurococcaceae; uncultured; uncultured archaeon
g_test	chimney_activity	New.CleanUp.ReferenceOTU1661470	87.8512	0	4	0	3.96313e-05	0.0007375	9.03947e-06	8.07565e-06	0	Archaea; Nanoarchaeota; Nanoarchaeota Incertae Sedis; Unknown Order; Unknown Family; Nanoarchaeum; uncultured nanoarchaeote
g_test	chimney_activity	New.CleanUp.ReferenceOTU599552	76.9075	0	4	2.83063e-06	0.000319528	0.000284207	0	6.46052e-05	0	Archaea; Crenarchaeota; Thermoprotei; Desulfurococcales; Desulfurococcaceae; uncultured; uncultured archaeon
g_test	chimney_activity	JF738097.1.941	69.7764	1.83949e-16	4	0	0.00028485	0.000183476	2.25987e-06	8.07565e-06	0	Archaea; Crenarchaeota; Thermoprotei; Desulfurococcales; Desulfurococcaceae; uncultured; uncultured archaeon
g_test	chimney_activity	JX507286.1.931	60.2596	1.36622e-14	5	9.34109e-05	0.000121371	0.000226646	2.25987e-06	8.07565e-06	0	Archaea; Euryarchaeota; Thermococci; Thermococcales; Thermococcaceae; Palaeococcus; Ambiguous_taxa
g_test	chimney_activity	New.ReferenceOTU24	59.4299	2.05669e-14	4	8.20883e-05	0.000123848	0.000647561	9.03947e-05	0	0	Archaea; Crenarchaeota; Thermoprotei; Desulfurococcales; Desulfurococcaceae; Ignicoccus
g_test	chimney_activity	New.ReferenceOTU688	58.0256	4.16355e-14	4	0.00040478	4.95392e-06	0	2.25987e-06	1.61513e-05	0	Unassigned
g_test	chimney_activity	FJ957443.1.1492	54.4095	2.59493e-13	6	0.00080673	1.73387e-05	0.00104329	2.71184e-05	0.00144554	8.97593e-05	Bacteria; Actinobacteria; Actinobacteria; Propionibacteriales; Propionibacteriaceae; Propionibacterium; uncultured bacterium
g_test	chimney_activity	KF278499.1.1249	53.0351	5.17467e-13	5	2.83063e-06	2.47696e-06	0.00231323	0.000144631	0.00165551	0	Archaea; Crenarchaeota; Thermoprotei; Desulfurococcales; Desulfurococcaceae
g_test	chimney_activity	AB235330.1.1100	43.1233	8.04263e-11	5	3.1137e-05	0.000151094	0.000125915	2.25987e-06	8.07565e-06	0	Archaea; Crenarchaeota; Thermoprotei; Desulfurococcales; Desulfurococcaceae; uncultured; Ambiguous_taxa
g_test	chimney_activity	New.CleanUp.ReferenceOTU721939	40.8798	2.50992e-10	4	0	0.000175864	0.000111524	2.25987e-06	8.07565e-06	0	Archaea; Crenarchaeota; Thermoprotei; Desulfurococcales; Desulfurococcaceae; uncultured; uncultured archaeon
g_test	chimney_activity	New.ReferenceOTU1000	34.7493	5.76153e-09	4	6.51045e-05	6.44009e-05	0.000348964	4.74572e-05	0	0	Archaea; Crenarchaeota; Thermoprotei; Desulfurococcales; Desulfurococcaceae; Ignicoccus
g_test	chimney_activity	New.ReferenceOTU2726	32.8351	1.52736e-08	5	0.000104733	2.47696e-06	0.000165488	2.25987e-06	8.07565e-06	0	Archaea; Euryarchaeota; Thermococci; Thermococcales; Thermococcaceae; Thermococcus
g_test	chimney_activity	AB193980.1.1441	30.1637	5.9916e-08	5	8.4919e-06	1.73387e-05	3.59756e-06	0	0.000702582	5.54395e-05	Archaea; Thaumarchaeota; Marine Group I; uncultured marine archaeon; uncultured marine archaeon; uncultured marine archaeon; uncultured marine archaeon
g_test	chimney_activity	New.ReferenceOTU2651	29.2797	9.36937e-08	4	2.83063e-06	0.000116417	0.000100732	0	1.61513e-05	0	Archaea; Crenarchaeota; Thermoprotei; Desulfurococcales; Desulfurococcaceae; uncultured; uncultured archaeon
g_test	chimney_activity	AJ431248.1.1498	28.9465	1.10304e-07	4	0.000138701	6.44009e-05	5.39634e-05	1.35592e-05	0	0	Bacteria; Thermotogae; Thermotogae; Mesoaciditogales; Mesoaciditogaceae; uncultured
g_test	chimney_activity	New.ReferenceOTU1168	26.7477	3.40677e-07	4	5.66126e-06	0	7.19512e-06	0	0.000581447	1.58399e-05	Unassigned
g_test	chimney_activity	AB019239.1.1409	25.9921	4.99443e-07	4	2.83063e-05	9.66014e-05	5.39634e-05	0	8.07565e-06	0	Archaea; Euryarchaeota; Thermococci; Thermococcales; Thermococcaceae; Palaeococcus
g_test	chimney_activity	New.CleanUp.ReferenceOTU1303812	21.1528	6.12572e-06	4	0.000198144	9.90783e-06	0	2.25987e-06	4.84539e-05	0	Archaea; Euryarchaeota; Thermococci; Thermococcales; Thermococcaceae; Palaeococcus
g_test	chimney_activity	New.ReferenceOTU260	20.3395	9.28758e-06	4	0.000152854	0	0	0.000119773	0.000912549	5.27996e-06	Unassigned
g_test	chimney_activity	AB111029.1.1388	18.7344	2.13378e-05	4	0	6.93548e-05	0.000111524	6.7796e-06	8.07565e-06	0	Archaea; Euryarchaeota; Archaeoglobi; Archaeoglobales; Archaeoglobaceae; Geoglobus
g_test	chimney_activity	FM242729.1.1163	17.1586	4.84262e-05	5	6.79352e-05	2.22926e-05	0.000219451	4.29375e-05	8.07565e-06	0	Archaea; Euryarchaeota; Thermococci; Thermococcales; Thermococcaceae; Thermococcus; Ambiguous_taxa
g_test	chimney_activity	AJ419869.1.1482	14.845	0.00016302	4	4.81207e-05	2.47696e-06	8.99391e-05	4.51973e-06	0	0	Archaea; Euryarchaeota; Thermococci; Thermococcales; Thermococcaceae; Thermococcus
g_test	chimney_activity	FN562828.1.1271	14.2625	0.000220252	4	2.83063e-06	0	1.43902e-05	9.71743e-05	6.46052e-05	0	Bacteria; Proteobacteria; Epsilonproteobacteria; Campylobacterales; Helicobacteraceae; Sulfurovum; uncultured Epsilonproteobacteria bacterium
g_test	chimney_activity	KF083453.1.1354	13.5141	0.000325321	5	0.000152854	0	0.000183476	2.25987e-06	0.000226118	7.91993e-06	Bacteria; Actinobacteria; Actinobacteria; Propionibacteriales; Propionibacteriaceae; Propionibacterium; uncultured bacterium
g_test	chimney_activity	New.CleanUp.ReferenceOTU1657142	13.1379	0.000394407	4	0	2.47696e-06	0.000136707	2.25987e-06	8.07565e-06	0	Unassigned
g_test	chimney_activity	New.ReferenceOTU944	12.7134	0.000486933	5	0	2.47696e-06	3.59756e-06	7.68355e-05	1.61513e-05	5.27996e-06	Unassigned
g_test	chimney_activity	New.CleanUp.ReferenceOTU1045475	12.7134	0.000486933	4	0	7.18318e-05	3.23781e-05	2.25987e-06	8.07565e-06	0	Archaea; Crenarchaeota; Thermoprotei; Desulfurococcales; Desulfurococcaceae; uncultured; uncultured archaeon
g_test	chimney_activity	New.CleanUp.ReferenceOTU1332294	12.29	0.000605982	4	2.83063e-06	6.68779e-05	3.23781e-05	0	1.61513e-05	0	Archaea; Crenarchaeota; Thermoprotei; Desulfurococcales; Desulfurococcaceae; uncultured; uncultured archaeon
g_test	chimney_activity	New.CleanUp.ReferenceOTU155450	11.2912	0.00102818	4	2.83063e-06	4.95392e-05	3.59756e-05	2.25987e-06	0	0	Archaea; Crenarchaeota; Thermoprotei; Desulfurococcales; Desulfurococcaceae; uncultured; uncultured archaeon
g_test	chimney_activity	FM242727.1.1145	10.8003	0.00132955	4	5.66126e-06	4.95392e-06	7.55488e-05	0	0.000670279	0	Archaea; Euryarchaeota; Archaeoglobi; Archaeoglobales; Archaeoglobaceae; Geoglobus; Ambiguous_taxa
g_test	chimney_activity	GQ261797.1.1462	10.6466	0.00143354	4	4.52901e-05	8.17396e-05	0	1.35592e-05	1.61513e-05	0	Bacteria; Proteobacteria; Epsilonproteobacteria; Campylobacterales; Helicobacteraceae; Sulfurimonas; uncultured bacterium
g_test	chimney_activity	New.CleanUp.ReferenceOTU1752232	10.4191	0.00160897	4	3.1137e-05	4.95392e-06	5.7561e-05	2.25987e-06	0	0	Archaea; Euryarchaeota; Thermococci; Thermococcales; Thermococcaceae; Thermococcus
g_test	chimney_activity	New.ReferenceOTU171	10.2367	0.0017626	4	5.94433e-05	0	6.11586e-05	6.7796e-06	8.07565e-06	0	Archaea; Euryarchaeota; Thermococci; Thermococcales; Thermococcaceae; Thermococcus
g_test	chimney_activity	HQ529898.1.916	10.1908	0.00179347	4	5.66126e-06	0	0	2.25987e-06	0.00024227	2.63998e-06	Archaea; Thaumarchaeota; Marine Group I
g_test	chimney_activity	U82237.1.1396	9.36141	0.00279483	4	3.96288e-05	2.47696e-06	6.47561e-05	6.7796e-06	0	0	Archaea; Euryarchaeota; Thermococci; Thermococcales; Thermococcaceae; Thermococcus
g_test	chimney_activity	New.CleanUp.ReferenceOTU247619	8.6876	0.00401071	4	2.83063e-06	5.697e-05	3.59756e-06	0	8.07565e-06	0	Archaea; Nanoarchaeota; Nanoarchaeota Incertae Sedis; Unknown Order; Unknown Family; Nanoarchaeum; uncultured nanoarchaeote
g_test	chimney_activity	KJ563960.1.906	8.25791	0.00504202	4	3.1137e-05	2.47696e-06	4.31707e-05	2.25987e-06	0	0	Archaea; Euryarchaeota; Thermoplasmata; Thermoplasmatales; Deep Sea Hydrothermal Vent Gp 2(DHVEG-2); uncultured archaeon; uncultured archaeon
g_test	chimney_activity	JQ220978.1.916	7.17207	0.0091343	6	0.00200126	4.95392e-06	1.07927e-05	2.25987e-06	0.00644437	0.000261358	Archaea; Thaumarchaeota; Marine Group I; uncultured marine archaeon; uncultured marine archaeon; uncultured marine archaeon; uncultured marine archaeon
g_test	chimney_activity	JQ221323.1.914	6.18335	0.0157927	5	2.83063e-06	5.697e-05	0	2.25987e-06	0.000218043	9.50392e-05	Archaea; Thaumarchaeota; Marine Group I
g_test	chimney_activity	New.ReferenceOTU1942	6.11857	0.016264	4	2.26451e-05	0	5.03659e-05	2.25987e-06	8.07565e-06	0	Archaea; Euryarchaeota; Thermococci; Thermococcales; Thermococcaceae; Thermococcus
g_test	chimney_activity	AB919399.1.1312	5.58918	0.0218152	6	5.66126e-06	4.95392e-06	7.19512e-06	4.51973e-06	0.000121135	3.43197e-05	Archaea; Thaumarchaeota; Marine Group I
g_test	chimney_activity	New.CleanUp.ReferenceOTU822827	5.51347	0.022618	4	5.66126e-05	0	3.95732e-05	9.03947e-06	0.000549144	0	Unassigned
g_test	chimney_activity	New.CleanUp.ReferenceOTU976788	5.33445	0.0248834	4	2.83063e-05	2.47696e-06	3.23781e-05	4.51973e-06	0	0	Archaea; Nanoarchaeota; Nanoarchaeota Incertae Sedis; Unknown Order; Unknown Family; Nanoarchaeum; uncultured nanoarchaeote
g_test	chimney_activity	New.CleanUp.ReferenceOTU191359	5.30128	0.0250575	4	1.98144e-05	4.95392e-06	2.87805e-05	2.25987e-06	0	0	Archaea; Nanoarchaeota; Nanoarchaeota Incertae Sedis; Unknown Order; Unknown Family; Nanoarchaeum; uncultured nanoarchaeote
g_test	chimney_activity	JN856413.1.1453	5.29793	0.0250575	5	2.83063e-06	2.47696e-05	0.00115482	0.000528809	2.4227e-05	0	Bacteria; Aquificae; Aquificae; Aquificales; Desulfurobacteriaceae; Desulfurobacterium; Ambiguous_taxa
g_test	chimney_activity	New.CleanUp.ReferenceOTU1489780	4.47981	0.0399744	4	1.69838e-05	4.95392e-06	2.51829e-05	2.25987e-06	0	0	Archaea; Nanoarchaeota; Nanoarchaeota Incertae Sedis; Unknown Order; Unknown Family; Nanoarchaeum; uncultured nanoarchaeote
chimney_activity = active chimneys vs. inactive chimneys

## Sheet: Bac inactive chimneys vs others
Supplementary Table S5: significant differences between counts in distinct bacterial and archaeal groups found in relation to habitat types.
						open ocean		plume		vent fluids		active chimneys			inactive chimneys
Test	Variable	#OTU ID	Test-Statistic	FDR_P	n_sites	RF4	RF1	F9	F5	F6	F1	S5	S6	S8	S7	S1	S2	S4	taxonomy
g_test	inactive chimneys vs other sites	AB858534.1.1408	74164	0	8	4.64245e-06	0	9.64503e-05	0	1.08186e-05	0.00010098	0	0	0	0.000111161	0.00033798	0.360234	9.8104e-05	Bacteria;Proteobacteria;Deltaproteobacteria;Desulfobacterales;Desulfobulbaceae;Desulfobulbus;uncultured bacterium
g_test	inactive chimneys vs other sites	GQ867408.1.1451	68490.9	0	13	0.000790763	1.31617e-05	0.000284467	0.000109545	0.000504867	3.54316e-06	2.74511e-05	3.09146e-05	0.00243009	4.27542e-06	8.65558e-05	0.346758	6.607e-05	Bacteria;Proteobacteria;Gammaproteobacteria;Enterobacteriales;Enterobacteriaceae;Escherichia-Shigella
g_test	inactive chimneys vs other sites	M93356.1.1475	55450.5	0	11	0.123913	0.244838	0.0986882	0.0581246	0.00755136	0.000200188	3.77452e-05	0	2.80472e-05	0	4.53388e-05	7.8953e-05	2.40255e-05	Bacteria;Proteobacteria;Gammaproteobacteria;Oceanospirillales;Halomonadaceae;Halomonas;uncultured Halomonas sp,
g_test	inactive chimneys vs other sites	FJ820437.1.1482	35945	0	10	3.09496e-06	0	0.000142844	0	0.00241254	0.000387976	0.0229234	0.449682	0.000146246	0.00739007	7.0069e-05	0	1.00106e-05	Bacteria;Proteobacteria;Epsilonproteobacteria;Campylobacterales;Helicobacteraceae;Sulfurimonas;uncultured bacterium
g_test	inactive chimneys vs other sites	GQ848472.1.1507	32941.2	0	6	0	0	4.15102e-05	0	4.44763e-05	0.00010098	0	0	0	0	0.000601769	6.38343e-05	0.19062	Bacteria;Proteobacteria;Gammaproteobacteria;Thiotrichales;Thiotrichaceae;uncultured;uncultured sediment bacterium
g_test	inactive chimneys vs other sites	JQ712402.1.1377	23026.5	0	12	0	1.64522e-05	0.000207551	1.00731e-05	0.0530555	0.00201074	0.156871	0.0215011	0.00625452	0.000162466	8.24341e-05	1.00791e-05	6.00637e-06	Bacteria;Proteobacteria;Epsilonproteobacteria;Campylobacterales;Helicobacteraceae;Sulfurovum;uncultured bacterium
g_test	inactive chimneys vs other sites	EU880515.1.1503	22400.2	0	6	1.54748e-06	3.12591e-05	1.58716e-05	0.183574	0.000120206	0	0	0	0	0	2.47302e-05	0	0	Bacteria;Bacteroidetes;Flavobacteriia;Flavobacteriales;Flavobacteriaceae;Zunongwangia
g_test	inactive chimneys vs other sites	AY726843.1.1232	22035.1	0	13	0.0444143	0.00252541	0.0321717	0.0787254	0.0277412	0.00351659	5.14708e-06	1.37398e-05	4.00674e-06	4.27542e-06	3.02258e-05	2.85575e-05	1.00106e-05	Bacteria;Proteobacteria;Gammaproteobacteria;Alteromonadales;Alteromonadaceae;Alteromonas
g_test	inactive chimneys vs other sites	HQ673086.1.1450	21700.7	0	9	0.0525154	0.0577323	0.0442585	0.0441191	0.00140882	0.000775952	0	0	0	0	2.61041e-05	2.68776e-05	1.40149e-05	Bacteria;Proteobacteria;Deltaproteobacteria;SAR324 clade(Marine group B);uncultured bacterium;uncultured bacterium;uncultured bacterium
g_test	inactive chimneys vs other sites	AY531584.1.1473	20052.5	0	11	1.08324e-05	1.64522e-06	1.22089e-06	1.25914e-06	0.000228392	8.50358e-05	0.000178432	4.2937e-05	0.261991	7.69576e-05	0	5.03955e-06	0	Bacteria;Proteobacteria;Epsilonproteobacteria;Nautiliales;Nautiliaceae;Nitratifractor;uncultured bacterium
g_test	inactive chimneys vs other sites	JX262619.1.1348	19770.2	0	5	0	8.88417e-05	6.10445e-06	0.161913	8.77506e-05	0	0	0	0	0	1.78607e-05	0	0	Bacteria;Proteobacteria;Gammaproteobacteria;Oceanospirillales;Halomonadaceae;Chromohalobacter
g_test	inactive chimneys vs other sites	GQ901061.1.1314	16764.9	0	11	0.0417851	0.00694281	0.075114	0.0218436	0.000306526	1.77158e-05	0	8.58739e-06	2.00337e-06	0	3.70954e-05	5.20754e-05	2.00212e-05	Bacteria;Proteobacteria;Gammaproteobacteria;Alteromonadales;Idiomarinaceae;Idiomarina
g_test	inactive chimneys vs other sites	JQ287449.1.1504	16611.7	0	11	0	3.29043e-06	0.000249061	0	0.00283807	0.00178752	0.0504019	0.00838473	0.00072522	0.058988	0.0970428	0.00481613	6.00637e-06	Bacteria;Proteobacteria;Gammaproteobacteria;Thiotrichales;Piscirickettsiaceae;Thiomicrospira;uncultured gamma proteobacterium
g_test	inactive chimneys vs other sites	AM945667.1.1333	15155.4	0	9	0.0361616	0.00562993	0.0681562	0.0210214	0.000223584	1.94874e-05	0	0	0	0	2.06085e-05	4.36761e-05	1.40149e-05	Bacteria;Proteobacteria;Gammaproteobacteria;Alteromonadales;Idiomarinaceae;Idiomarina
g_test	inactive chimneys vs other sites	New.ReferenceOTU2026	13504.8	0	7	0	0	0	0	3.60619e-06	7.44063e-05	6.86277e-06	8.58739e-06	0.00114593	0.0875842	0.000174486	0	0	Bacteria;Proteobacteria;Gammaproteobacteria;Methylococcales;Marine Methylotrophic Group 2;uncultured gamma proteobacterium;uncultured gamma proteobacterium
g_test	inactive chimneys vs other sites	GQ345764.1.1378	13375.6	0	12	0.0753562	0.0151738	0.0130122	0.0181732	0.0026217	0.00450158	1.71569e-06	0	2.00337e-06	1.71017e-05	2.19824e-05	2.18381e-05	2.00212e-06	Bacteria;Proteobacteria;Gammaproteobacteria;Oceanospirillales;SUP05 cluster;uncultured gamma proteobacterium;uncultured gamma proteobacterium
g_test	inactive chimneys vs other sites	JQ287369.1.1507	12434.4	0	6	0	0	6.34862e-05	0	1.20206e-06	1.77158e-06	0	0	0	0	6.73212e-05	5.03955e-05	0.0722065	Bacteria;Proteobacteria;Gammaproteobacteria;Chromatiales;Chromatiaceae;Nitrosococcus;uncultured bacterium
g_test	inactive chimneys vs other sites	FN562914.1.1348	12240.5	0	9	0	0	1.34298e-05	0	1.56268e-05	0.000887561	0.000332844	3.43496e-06	0	0.00193463	0.0428781	0.00373767	0.00666506	Bacteria;Bacteroidetes;Cytophagia;Cytophagales;Flammeovirgaceae;uncultured;uncultured bacterium
g_test	inactive chimneys vs other sites	FN562844.1.1365	11716.3	0	13	1.08324e-05	2.13878e-05	0.0471337	0.000345005	0.0299386	0.0446846	0.0194371	0.00616918	0.000566954	0.00370893	0.0013478	3.86366e-05	1.00106e-05	Bacteria;Proteobacteria;Epsilonproteobacteria;Campylobacterales;Helicobacteraceae;Sulfurovum;uncultured epsilon proteobacterium
g_test	inactive chimneys vs other sites	AY327884.1.1457	10102.4	0	12	1.54748e-06	0	1.0988e-05	3.77743e-06	6.97197e-05	0.000869846	1.71569e-05	3.43496e-06	0.000697173	0.0622908	0.00380296	1.67985e-06	6.00637e-06	Bacteria;Bacteroidetes;Flavobacteriia;Flavobacteriales;Flavobacteriaceae;Lutibacter;uncultured bacterium
g_test	inactive chimneys vs other sites	AY531587.1.1446	9043.38	0	12	3.71396e-05	1.80974e-05	0.0132613	0.000127173	0.0526179	0.0312436	0.0245481	0.00247832	0.0918926	0.0149789	0.00579374	4.03164e-05	0	Bacteria;Proteobacteria;Epsilonproteobacteria;Campylobacterales;Helicobacteraceae;Sulfurovum;uncultured bacterium
g_test	inactive chimneys vs other sites	AY251057.1.1427	8448.89	0	10	0	0	0.000153832	1.25914e-06	0.0108065	0.000228534	0.0325347	0.0419391	0.00499039	1.06886e-05	4.12171e-06	3.3597e-06	0	Bacteria;Proteobacteria;Epsilonproteobacteria;Nautiliales;Nautiliaceae;uncultured
g_test	inactive chimneys vs other sites	AB100010.1.1315	8334.8	0	8	0	0	8.54623e-06	0	0.000138237	0.000198417	8.23532e-05	0	0	9.19216e-05	0.0293081	0.00619361	6.00637e-06	Bacteria;Bacteroidetes;VC2,1 Bac22;uncultured alpha proteobacterium;uncultured alpha proteobacterium;uncultured alpha proteobacterium;uncultured alpha proteobacterium
g_test	inactive chimneys vs other sites	FJ717231.1.1497	7583.26	0	4	0	0	9.76712e-06	0	0	0	0	0	0	0	1.92346e-05	8.39925e-06	0.0438665	Bacteria;Proteobacteria;Gammaproteobacteria;Chromatiales;Ectothiorhodospiraceae;Acidiferrobacter;uncultured bacterium
g_test	inactive chimneys vs other sites	New.ReferenceOTU2454	7531.32	0	5	0	0	1.83133e-05	0	2.40413e-06	0	0	0	0	0	1.23651e-05	2.18381e-05	0.0436483	Bacteria;Proteobacteria;Gammaproteobacteria;Thiotrichales;Thiotrichaceae;uncultured;uncultured gamma proteobacterium
g_test	inactive chimneys vs other sites	New.ReferenceOTU1465	7377.15	0	7	0	0	4.88356e-06	0	4.92846e-05	0.000386204	0	0	0	0.00146861	0.0266839	0.00355288	2.00212e-06	Bacteria;Proteobacteria;Gammaproteobacteria;Xanthomonadales;uncultured
g_test	inactive chimneys vs other sites	GQ337231.1.1435	6952.26	0	10	0.0166045	0.0211131	0.0123603	0.0141968	0.000357013	0.000396834	0	0	2.00337e-06	0	6.86951e-06	1.34388e-05	2.00212e-06	Bacteria;Proteobacteria;Alphaproteobacteria;SAR11 clade;Surface 1;uncultured bacterium;uncultured bacterium
g_test	inactive chimneys vs other sites	AM990660.1.1353	6929.52	0	11	0.0134321	0.000519888	0.033196	0.00977221	0.00193292	7.44063e-05	1.71569e-06	0	2.00337e-06	0	1.51129e-05	2.01582e-05	8.00849e-06	Bacteria;Bacteroidetes;Flavobacteriia;Flavobacteriales;Flavobacteriaceae;Mesonia
g_test	inactive chimneys vs other sites	New.ReferenceOTU79	6895.57	0	7	0	0	1.34298e-05	0	1.56268e-05	5.4919e-05	0	0	0	5.13051e-05	0.0272981	0.000423322	2.00212e-06	Bacteria;Proteobacteria;Gammaproteobacteria;Thiotrichales;Piscirickettsiaceae;endosymbionts;uncultured bacterium
g_test	inactive chimneys vs other sites	New.ReferenceOTU2516	6630.46	0	10	0	0	1.34298e-05	0	0.000173097	0.00115684	0.000372305	5.15243e-06	0.000246414	0.0232583	0.0145345	0.00111038	5.80615e-05	Bacteria;Bacteroidetes;Flavobacteriia;Flavobacteriales;Flavobacteriaceae;Lutibacter;uncultured bacterium
g_test	inactive chimneys vs other sites	HQ672999.1.1436	6297.7	0	9	0.0194766	0.0150768	0.0129146	0.0105856	0.000395479	0.000331285	0	0	0	0	1.09912e-05	1.00791e-05	2.00212e-06	Bacteria;Proteobacteria;Alphaproteobacteria;SAR11 clade;Deep 1;uncultured SAR11 cluster alpha proteobacterium;uncultured SAR11 cluster alpha proteobacterium
g_test	inactive chimneys vs other sites	New.ReferenceOTU1843	6255.97	0	8	0	0	0	0	2.40413e-06	5.31474e-06	2.2304e-05	1.03049e-05	0.0852594	0.000192394	2.47302e-05	5.03955e-06	0	Bacteria;Proteobacteria;Deltaproteobacteria;Desulfobacterales;Desulfobulbaceae;Desulfobulbus
g_test	inactive chimneys vs other sites	FN397818.1.1375	6229.3	0	5	0	0	4.88356e-06	0	0	3.01169e-05	0	0	0	0	5.49561e-06	5.03955e-06	0.0361884	Bacteria;Proteobacteria;Gammaproteobacteria;Thiotrichales;Thiotrichaceae;uncultured;uncultured gamma proteobacterium
g_test	inactive chimneys vs other sites	FN553626.1.1305	6167.46	0	6	0	0	7.32534e-06	0	6.01032e-06	1.59442e-05	0	0	0	0	8.24341e-06	1.00791e-05	0.035812	Bacteria;Proteobacteria;Gammaproteobacteria;Chromatiales;Ectothiorhodospiraceae;Acidiferrobacter;uncultured sediment bacterium
g_test	inactive chimneys vs other sites	AY225615.1.1425	6132.49	0	12	0	4.93565e-06	0.000267375	1.25914e-06	0.00490562	0.00107889	0.0304913	0.0363607	2.00337e-05	0.000472434	6.73212e-05	1.67985e-06	2.00212e-06	Bacteria;Proteobacteria;Epsilonproteobacteria;Campylobacterales;Helicobacteraceae;Sulfurimonas;uncultured bacterium
g_test	inactive chimneys vs other sites	JQ287020.1.1482	6032.02	0	8	0	0	0	0	8.41444e-06	8.14927e-05	3.43139e-06	1.71748e-06	0.000254428	0.0303747	0.00462593	0.000841605	0	Bacteria;Bacteroidetes;Cytophagia;Cytophagales;Flammeovirgaceae;Flexithrix
g_test	inactive chimneys vs other sites	DQ832646.1.1381	5946.61	0	13	1.54748e-06	1.64522e-06	1.70925e-05	1.25914e-06	0.000449572	0.000575763	0.00125074	1.20223e-05	0.000198334	0.017215	0.0138695	0.00353105	0.00124732	Bacteria;Proteobacteria;Alphaproteobacteria;Rhodobacterales;Rhodobacteraceae;uncultured;uncultured bacterium
g_test	inactive chimneys vs other sites	AY251062.1.1454	5666.43	0	10	6.18993e-06	0	0.00031621	0	0.00527465	0.00267863	0.00635149	0.00100644	0.0552509	3.84788e-05	6.04517e-05	5.03955e-06	0	Bacteria;Proteobacteria;Epsilonproteobacteria;Nautiliales;Nautiliaceae;Nitratifractor;uncultured bacterium
g_test	inactive chimneys vs other sites	DQ270642.1.1451	5635.62	0	8	0	0	2.44178e-06	0	7.93362e-05	0.000232077	5.14708e-06	1.71748e-06	0.000158266	0.0343765	0.00154976	0	0	Bacteria;Proteobacteria;Alphaproteobacteria;SB1-18;uncultured bacterium;uncultured bacterium;uncultured bacterium
g_test	inactive chimneys vs other sites	AB476182.1.1462	5605.33	0	13	1.54748e-06	1.64522e-06	2.68596e-05	2.51829e-06	0.000724844	0.000758236	0.00024706	3.43496e-06	0.00034458	0.0311828	0.00676372	3.3597e-06	2.00212e-06	Bacteria;Proteobacteria;Gammaproteobacteria;Thiotrichales;Thiotrichaceae;uncultured;uncultured bacterium
g_test	inactive chimneys vs other sites	JQ287385.1.1484	5575.13	0	6	0	0	2.1976e-05	0	0.000144248	2.1259e-05	0	0	0	0	0.00151816	2.85575e-05	0.031087	Bacteria;Bacteroidetes;VC2,1 Bac22;uncultured bacterium;uncultured bacterium;uncultured bacterium;uncultured bacterium
g_test	inactive chimneys vs other sites	HM557570.1.1378	5442.51	0	9	1.23799e-05	1.64522e-06	9.76712e-06	0	0	0	3.43139e-06	1.71748e-06	0.000258435	0	8.24341e-06	0.0272976	1.00106e-05	Bacteria;Proteobacteria;Gammaproteobacteria;Xanthomonadales;Xanthomonadaceae;Stenotrophomonas
g_test	inactive chimneys vs other sites	DQ395997.1.1462	5416.49	0	11	0.0106482	0.0140123	0.0172597	0.00400282	0.00208919	0.0019948	3.43139e-06	0	6.01011e-06	0	5.49561e-06	1.84784e-05	6.00637e-06	Bacteria;Proteobacteria;Alphaproteobacteria;Sphingomonadales;Erythrobacteraceae;Altererythrobacter;uncultured bacterium
g_test	inactive chimneys vs other sites	New.ReferenceOTU2480	5414.84	0	11	0	0	4.76147e-05	2.51829e-06	0.00026205	0.000240935	0.00222868	0.000235295	0.00019032	0.0162359	0.0169265	1.67985e-06	2.00212e-06	Bacteria;Proteobacteria;Epsilonproteobacteria;Campylobacterales;Helicobacteraceae;Sulfurimonas;uncultured bacterium
g_test	inactive chimneys vs other sites	AB476216.1.1305	5224.23	0	7	0	0	7.32534e-06	0	5.6497e-05	0.000116924	0	0	0	0.0013831	0.0177536	0.00308757	0.000252267	Bacteria;Proteobacteria;Alphaproteobacteria;Rhizobiales;Phyllobacteriaceae
g_test	inactive chimneys vs other sites	New.ReferenceOTU1298	5188.1	0	11	4.64245e-06	0	0.000863169	1.63689e-05	0.0392317	5.31474e-06	0.00114265	1.03049e-05	6.01011e-06	2.13771e-06	4.12171e-06	1.84784e-05	0	Bacteria;Proteobacteria;Epsilonproteobacteria;Campylobacterales;Helicobacteraceae;Sulfurovum;uncultured epsilon proteobacterium
g_test	inactive chimneys vs other sites	HQ674142.1.1460	5141.79	0	9	0.0159963	0.0148678	0.0113762	0.00770847	0.000403893	0.000207275	0	0	0	0	5.49561e-06	8.39925e-06	0.000202214	Bacteria;Chloroflexi;SAR202 clade;uncultured bacterium;uncultured bacterium;uncultured bacterium;uncultured bacterium
g_test	inactive chimneys vs other sites	JQ287080.1.1521	4976.96	0	7	0	0	3.66267e-06	0	0.000211563	0.000345458	0.000106373	0	0	0.000168879	0.0186851	0.00335802	0	Bacteria;Proteobacteria;Deltaproteobacteria;Desulfobacterales;Desulfobulbaceae;Desulfobulbus;uncultured bacterium
g_test	inactive chimneys vs other sites	EU574671.1.1438	4945.04	0	9	0	0	2.07551e-05	0	0.00100012	0.000698002	0.00494463	0.0676463	5.80977e-05	0.00221467	8.51819e-05	0	4.00424e-06	Bacteria;Proteobacteria;Epsilonproteobacteria;Campylobacterales;Helicobacteraceae;Sulfurimonas
g_test	inactive chimneys vs other sites	New.ReferenceOTU1473	4918.37	0	9	0	1.64522e-06	8.54623e-06	1.25914e-06	5.7699e-05	0.000109838	0	0	0	7.05445e-05	0.0176162	0.00300693	2.00212e-06	Bacteria;Proteobacteria;Gammaproteobacteria;Xanthomonadales;JTB255 marine benthic group
g_test	inactive chimneys vs other sites	KF758646.1.1510	4880.91	0	11	0.00652264	0.00158763	0.00676373	0.00904694	0.00412909	0.0187345	0	0	2.00337e-06	2.13771e-06	4.12171e-06	5.03955e-06	4.00424e-06	Bacteria;Proteobacteria;Gammaproteobacteria;Alteromonadales;Alteromonadaceae;Marinobacter
g_test	inactive chimneys vs other sites	JQ287102.1.1446	4738.45	0	8	0	0	4.88356e-06	0	2.76475e-05	8.14927e-05	1.71569e-06	0	0	0.00053229	0.0186837	1.00791e-05	0.000244259	Bacteria;Proteobacteria;Alphaproteobacteria;Rhizobiales;Hyphomicrobiaceae;uncultured;uncultured bacterium
g_test	inactive chimneys vs other sites	New.ReferenceOTU881	4695.01	0	9	0	0	0.00147239	1.25914e-05	0.0351063	0.000104523	0.000301962	8.75914e-05	2.00337e-06	0	1.3739e-06	1.34388e-05	0	Bacteria;Proteobacteria;Epsilonproteobacteria;Nautiliales;Nautiliaceae;uncultured;uncultured epsilon proteobacterium
g_test	inactive chimneys vs other sites	New.ReferenceOTU1294	4620.76	0	4	0	0	3.66267e-06	0	0	0	0	0	0	0	4.12171e-06	1.00791e-05	0.0267163	Bacteria;Proteobacteria;Deltaproteobacteria;Desulfobacterales;Nitrospinaceae;Nitrospina;uncultured bacterium
g_test	inactive chimneys vs other sites	New.CleanUp.ReferenceOTU506940	4608.65	0	7	0	0	4.88356e-06	0	1.32227e-05	0.000207275	0	0	2.00337e-06	0.00113512	0.0135879	0.0056611	0	Bacteria;Proteobacteria;Gammaproteobacteria;Thiotrichales;Piscirickettsiaceae;endosymbionts;uncultured bacterium
g_test	inactive chimneys vs other sites	New.ReferenceOTU1168	4599.74	0	9	0	0	8.54623e-06	1.25914e-06	5.28908e-05	0.000434037	1.02942e-05	1.71748e-06	0.000562947	0.025178	0.00430443	0	0	Bacteria;Bacteroidetes;Flavobacteriia;Flavobacteriales;Flavobacteriaceae
g_test	inactive chimneys vs other sites	JN874210.1.1430	4419.12	0	6	0	0	0.00110002	1.00731e-05	0.0331096	0.000240935	0.000118383	6.18292e-05	0	0	0	0	0	Bacteria;Aquificae;Aquificae;Aquificales;Aquificaceae;uncultured bacterium;uncultured bacterium
g_test	inactive chimneys vs other sites	DQ248333.1.1403	4315.99	0	9	0.00463935	0.0187407	0.011032	0.00401163	0.000676762	0.00193456	0	0	0	0	6.86951e-06	6.7194e-06	2.00212e-06	Bacteria;Proteobacteria;Gammaproteobacteria;Oceanospirillales;Alcanivoracaceae;Alcanivorax
g_test	inactive chimneys vs other sites	New.ReferenceOTU1163	4283.21	0	9	0	0	0.000482251	2.01463e-05	0.0123175	0.000286996	0.0285852	0.000638902	0.000134226	6.41313e-06	0	1.67985e-06	0	Bacteria;Proteobacteria;Epsilonproteobacteria;Nautiliales;Nautiliaceae;Thioreductor
g_test	inactive chimneys vs other sites	New.ReferenceOTU1075	4249.16	0	6	0	0	4.51729e-05	0	1.20206e-05	1.77158e-06	0	0	0	0	0.00705224	5.54351e-05	0.0146195	Bacteria;Proteobacteria;Deltaproteobacteria;Bdellovibrionales;Bacteriovoracaceae;uncultured;uncultured bacterium
g_test	inactive chimneys vs other sites	HF558580.1.1461	4239.48	0	4	0	0	4.88356e-06	0	0	0	0	0	0	0	4.12171e-06	3.3597e-06	0.024532	Bacteria;Proteobacteria;Gammaproteobacteria;Chromatiales;Ectothiorhodospiraceae;Acidiferrobacter;uncultured bacterium
g_test	inactive chimneys vs other sites	JQ287480.1.1461	4089.29	0	7	0	0	1.34298e-05	0	8.41444e-06	3.18884e-05	0	0	0	2.9928e-05	0.00676097	8.39925e-06	0.0140569	Bacteria;Proteobacteria;Alphaproteobacteria;SB1-18;uncultured bacterium;uncultured bacterium;uncultured bacterium
g_test	inactive chimneys vs other sites	JQ287054.1.1513	3996.97	0	8	0	0	4.88356e-06	0	2.04351e-05	7.79495e-05	0	3.43496e-06	0	8.97839e-05	0.0161172	5.20754e-05	2.00212e-06	Bacteria;Proteobacteria;Gammaproteobacteria
g_test	inactive chimneys vs other sites	New.ReferenceOTU9	3844.65	0	8	0	0	9.76712e-06	0	7.93362e-05	4.25179e-05	0.000362011	0.0426038	4.80809e-05	4.27542e-06	6.86951e-06	0	0	Bacteria;Proteobacteria;Epsilonproteobacteria;Nautiliales;Nautiliaceae;uncultured
g_test	inactive chimneys vs other sites	KC934973.1.1278	3829.42	0	9	0.00345553	0.0163781	0.0101493	0.0037598	0.000884719	0.00144738	0	0	0	0	6.86951e-06	1.67985e-06	2.00212e-06	Bacteria;Proteobacteria;Gammaproteobacteria;Oceanospirillales;Alcanivoracaceae;Alcanivorax
g_test	inactive chimneys vs other sites	AB842284.1.1464	3808.53	0	9	0	0	3.66267e-06	0	1.80309e-05	0.000635997	1.71569e-06	1.71748e-06	0	0.000910665	0.0158425	0.000102471	0.000176187	Bacteria;Proteobacteria;Gammaproteobacteria;Order Incertae Sedis;Family Incertae Sedis;Marinicella;uncultured bacterium
g_test	inactive chimneys vs other sites	New.ReferenceOTU190	3732.46	0	9	1.54748e-06	0	3.78476e-05	0	1.20206e-06	3.54316e-05	0	0	1.80303e-05	0.00107954	5.35822e-05	0.0175864	1.80191e-05	Bacteria;Proteobacteria;Deltaproteobacteria;Desulfobacterales;Desulfobulbaceae;Desulfobulbus;uncultured bacterium
g_test	inactive chimneys vs other sites	KF859552.1.1495	3699.87	0	12	0.0092524	0.0164357	0.00640845	0.00393482	0.000562566	1.59442e-05	3.43139e-06	0	8.01348e-06	2.13771e-06	2.88519e-05	2.35179e-05	1.20127e-05	Bacteria;Proteobacteria;Gammaproteobacteria;Oceanospirillales;Halomonadaceae;Halomonas;uncultured Halomonas sp,
g_test	inactive chimneys vs other sites	AB842295.1.1433	3689.72	0	12	1.54748e-06	8.22608e-06	0.000186796	6.29571e-06	0.0146556	0.0114781	0.0177265	0.0140558	9.61617e-05	0.00286667	0.000217077	8.39925e-06	0	Bacteria;Proteobacteria;Epsilonproteobacteria;Campylobacterales;Helicobacteraceae;Sulfurovum;uncultured bacterium
g_test	inactive chimneys vs other sites	DQ228627.1.1360	3628.71	0	7	0	0	1.95342e-05	0	0.000144248	0.000109838	0.00865567	0.0260919	0.00669726	1.92394e-05	0	0	0	Archaea;Euryarchaeota;Archaeoglobi;Archaeoglobales;Archaeoglobaceae;uncultured;uncultured archaeon
g_test	inactive chimneys vs other sites	AY531572.1.1473	3589.38	0	12	4.64245e-06	4.93565e-06	0.00305467	5.03657e-05	0.0152951	0.00993148	0.0430999	0.00568142	0.00185512	0.00720623	0.000688325	8.39925e-06	0	Bacteria;Proteobacteria;Epsilonproteobacteria;Campylobacterales;Helicobacteraceae;Sulfurovum;uncultured bacterium
g_test	inactive chimneys vs other sites	AJ294336.1.1357	3518.32	0	7	2.16648e-05	6.58086e-05	0.00171779	6.1698e-05	0.00636973	0.0285561	0	0	0	0	0	5.03955e-06	0	Bacteria;Proteobacteria;Gammaproteobacteria;Alteromonadales;Alteromonadaceae;Marinobacter
g_test	inactive chimneys vs other sites	GQ347082.1.1322	3432.02	0	7	0.0088516	0.00981865	0.00621189	0.00683841	0.000176703	0.00014527	0	0	0	0	0	1.00791e-05	0	Bacteria;Proteobacteria;Alphaproteobacteria;SAR11 clade;Surface 1
g_test	inactive chimneys vs other sites	FN562856.1.1370	3381.24	0	13	2.78547e-05	3.61947e-05	0.00460642	0.000157393	0.0330111	0.0730369	0.0288099	0.0315844	0.0225219	0.0413155	0.00316547	1.67985e-05	1.00106e-05	Bacteria;Proteobacteria;Epsilonproteobacteria;Campylobacterales;Helicobacteraceae;Sulfurovum;uncultured epsilon proteobacterium
g_test	inactive chimneys vs other sites	HQ433422.1.1369	3264.59	0	9	0.00890576	0.00837579	0.00695907	0.00581724	0.000248827	6.732e-05	0	0	0	0	2.7478e-06	1.00791e-05	2.00212e-06	Bacteria;Chloroflexi;SAR202 clade;uncultured Chloroflexi bacterium;uncultured Chloroflexi bacterium;uncultured Chloroflexi bacterium;uncultured Chloroflexi bacterium
g_test	inactive chimneys vs other sites	HM798654.1.1390	3243.75	0	7	0.00836569	0.00884468	0.00576382	0.00677545	0.000159874	0.000136412	0	0	0	0	1.3739e-06	0	0	Bacteria;Proteobacteria;Alphaproteobacteria;Rickettsiales;S25-593
g_test	inactive chimneys vs other sites	KC294233.1.1370	3199.37	0	6	0	0	1.58716e-05	1.63689e-05	0	0	0	0	2.00337e-06	0	5.49561e-06	0.0157016	6.00637e-06	Bacteria;Actinobacteria;Actinobacteria;Micrococcales;Micrococcaceae;Kocuria
g_test	inactive chimneys vs other sites	New.ReferenceOTU1053	3168.46	0	8	0	0	2.44178e-06	0	0.000138237	7.97211e-05	0	3.43496e-06	0	0.000233011	0.0100322	0.00336138	0.000558592	Bacteria;Proteobacteria;Gammaproteobacteria;Chromatiales;Ectothiorhodospiraceae;Acidiferrobacter;uncultured bacterium
g_test	inactive chimneys vs other sites	JQ712373.1.1376	3135.17	0	13	0.00022748	3.29043e-06	8.91249e-05	1.38506e-05	0.00138959	0.00485413	5.14708e-06	3.43496e-06	0.00034458	0.0326322	0.000726794	1.67985e-06	0.000210223	Bacteria;Proteobacteria;Epsilonproteobacteria;Campylobacterales;Helicobacteraceae;Sulfurimonas;uncultured bacterium
g_test	inactive chimneys vs other sites	New.ReferenceOTU2022	3120.89	0	7	0	0	0	0	8.53465e-05	8.8579e-06	1.71569e-06	1.71748e-06	8.21382e-05	0.0192565	0.000574291	0	0	Bacteria;Actinobacteria;Acidimicrobiia;Acidimicrobiales;uncultured;uncultured bacterium;uncultured bacterium
g_test	inactive chimneys vs other sites	JQ287203.1.1503	3120.68	0	5	0	0	4.88356e-06	0	1.20206e-06	0	0	0	0	0	2.06085e-05	1.51187e-05	0.0180391	Bacteria;Proteobacteria;Gammaproteobacteria
g_test	inactive chimneys vs other sites	HQ672307.1.1520	3111.28	0	8	0.00934834	0.00767658	0.00513872	0.00661806	0.000156268	4.96042e-05	0	0	0	0	1.3739e-06	6.7194e-06	0	Bacteria;Deferribacteres;Deferribacteres;Deferribacterales;SAR406 clade(Marine group A);uncultured bacterium;uncultured bacterium
g_test	inactive chimneys vs other sites	CP000153.576631.578078	3094.91	0	6	4.4877e-05	0	4.88356e-06	0	1.32227e-05	0	0	0	0	0	6.86951e-06	0.015295	8.00849e-06	Bacteria;Proteobacteria;Epsilonproteobacteria;Campylobacterales;Helicobacteraceae;Sulfurimonas;uncultured bacterium
g_test	inactive chimneys vs other sites	JN662083.1.1394	3069.36	0	5	0	0	0	0	0	1.77158e-06	1.71569e-06	0	0.00018431	0.019156	0.00033111	0	0	Bacteria;Proteobacteria;Gammaproteobacteria;Methylococcales;Marine Methylotrophic Group 2
g_test	inactive chimneys vs other sites	HM798709.1.1498	3058.63	0	10	0.00852353	0.00510346	0.0081238	0.0057291	0.000242817	0.000132868	0	0	2.00337e-06	0	6.86951e-06	5.03955e-06	4.00424e-06	Bacteria;Deferribacteres;Deferribacteres;Deferribacterales;SAR406 clade(Marine group A);uncultured Marinimicrobia bacterium;uncultured Marinimicrobia bacterium
g_test	inactive chimneys vs other sites	EF444735.1.1240	3056.95	0	8	0	0	0.000618991	0	0.000976075	0.000115153	0.0317386	0.000152856	1.00168e-05	8.55085e-06	1.3739e-06	0	0	Bacteria;Proteobacteria;Epsilonproteobacteria;Campylobacterales;Helicobacteraceae;Sulfurimonas;uncultured bacterium
g_test	inactive chimneys vs other sites	FJ497650.1.1461	3052.34	0	7	0	0	1.70925e-05	0	1.44248e-05	0.000104523	0	0	0	1.71017e-05	0.000285772	3.02373e-05	0.0178009	Bacteria;Proteobacteria;Gammaproteobacteria;Thiotrichales;Thiotrichaceae;uncultured;uncultured sediment bacterium
g_test	inactive chimneys vs other sites	FJ628247.1.1501	3034.12	0	11	4.1782e-05	9.87129e-06	0.000383359	1.51097e-05	0.0109784	0.0206052	3.43139e-06	0	0	0.000151778	1.51129e-05	5.03955e-06	6.00637e-06	Bacteria;Proteobacteria;Gammaproteobacteria;Oceanospirillales;SUP05 cluster;uncultured gamma proteobacterium;uncultured gamma proteobacterium
g_test	inactive chimneys vs other sites	GQ377795.1.1261	3018.01	0	7	9.28489e-06	4.93565e-06	4.15102e-05	2.39237e-05	0.0203906	0.00478149	0	0	0	0	0	8.39925e-06	0	Bacteria;Proteobacteria;Gammaproteobacteria;Oceanospirillales;Alcanivoracaceae;Alcanivorax;uncultured Alcanivorax sp,
g_test	inactive chimneys vs other sites	DQ456289.1.1457	2965.45	0	10	5.10669e-05	0	3.66267e-05	3.77743e-06	2.52433e-05	0	1.71569e-06	3.43496e-06	0.000132222	0	1.09912e-05	0.0152262	1.00106e-05	Bacteria;Proteobacteria;Gammaproteobacteria;Enterobacteriales;Enterobacteriaceae;Enterobacter;uncultured bacterium
g_test	inactive chimneys vs other sites	HQ163672.1.1351	2941.98	0	8	0.0102056	0.00371161	0.00898208	0.00347649	0.000270464	6.37769e-05	0	0	0	0	2.7478e-06	5.03955e-06	0	Bacteria;Proteobacteria;Deltaproteobacteria;SAR324 clade(Marine group B);uncultured bacterium;uncultured bacterium;uncultured bacterium
g_test	inactive chimneys vs other sites	EF441900.1.1412	2917.4	0	13	0.0102118	0.00842186	0.00716174	0.00785076	0.0109039	0.00905809	0.000864709	0.000353801	8.01348e-05	0.00497659	0.000577039	8.39925e-06	2.00212e-06	Bacteria;Proteobacteria;Epsilonproteobacteria;Campylobacterales;Helicobacteraceae;Sulfurimonas
g_test	inactive chimneys vs other sites	New.ReferenceOTU438	2872.13	0	5	0	0	1.22089e-06	0	0	1.06295e-05	0	0	0	0.000466021	0.0111368	3.3597e-06	0	Bacteria;Bacteroidetes;Flavobacteriia;Flavobacteriales;Flavobacteriaceae;Winogradskyella
g_test	inactive chimneys vs other sites	FR852970.1.1474	2863.01	0	11	1.54748e-06	4.93565e-06	2.07551e-05	0	0.00685176	0.000566905	0.0152765	0.00716532	4.40741e-05	4.91674e-05	5.49561e-06	1.67985e-06	0	Bacteria;Proteobacteria;Epsilonproteobacteria;Campylobacterales;Helicobacteraceae;Sulfurovum;uncultured bacterium
g_test	inactive chimneys vs other sites	FJ535342.1.1362	2861.62	0	5	0	0	3.66267e-06	0	0	5.31474e-06	0	0	0	0	5.49561e-06	5.03955e-06	0.0165856	Bacteria;Proteobacteria;Zetaproteobacteria;Mariprofundales;Mariprofundaceae;Mariprofundus;uncultured bacterium
g_test	inactive chimneys vs other sites	New.ReferenceOTU1045	2823.19	0	8	0	0	2.44178e-06	0	3.60619e-06	1.77158e-05	4.80394e-05	0	0	0.00102183	0.0103249	1.67985e-06	0.0006607	Bacteria;Bacteroidetes;Flavobacteriia;Flavobacteriales;Flavobacteriaceae;uncultured;uncultured Bacteroidetes bacterium
g_test	inactive chimneys vs other sites	JQ611114.1.1326	2814.58	0	13	2.63072e-05	4.93565e-06	0.013779	0.000101991	0.0049537	0.00938229	0.00114094	6.35467e-05	0.000192323	3.20657e-05	0.000329736	5.03955e-06	6.00637e-06	Bacteria;Proteobacteria;Epsilonproteobacteria;Campylobacterales;Helicobacteraceae;Sulfurovum;uncultured epsilon proteobacterium
g_test	inactive chimneys vs other sites	New.ReferenceOTU1785	2803.29	0	7	0.0263412	0.00132604	0.000313769	4.91066e-05	0.000123813	1.24011e-05	0	0	0	0	1.3739e-06	0	0	Bacteria;Bacteroidetes;Flavobacteriia;Flavobacteriales;Flavobacteriaceae
g_test	inactive chimneys vs other sites	New.ReferenceOTU1379	2800.49	0	4	0	0	1.22089e-06	0	0	0	0	0	0	0	1.3739e-06	1.67985e-06	0.0161912	Unassigned
g_test	inactive chimneys vs other sites	New.ReferenceOTU1032	2768.16	0	7	0	0	3.66267e-06	0	0	0.000141726	0	0	0.000128216	0.000696894	0.0101105	1.67985e-06	0.00158368	Bacteria;Bacteroidetes;Flavobacteriia;Flavobacteriales;Flavobacteriaceae
g_test	inactive chimneys vs other sites	FJ497620.1.1420	2754.18	0	9	0	1.64522e-06	1.70925e-05	0	0.000441157	3.54316e-05	0.0164878	0.025642	1.40236e-05	0.000211633	0.000829837	0	0	Bacteria;Proteobacteria;Epsilonproteobacteria;Campylobacterales;Campylobacteraceae;Sulfurospirillum;uncultured bacterium
g_test	inactive chimneys vs other sites	New.ReferenceOTU1028	2741.21	0	5	0	0	8.54623e-06	0	6.01032e-06	3.89748e-05	0	0	0	0	0	1.1759e-05	0.0161131	Bacteria;Proteobacteria;Gammaproteobacteria;Thiotrichales;Thiotrichaceae;uncultured;uncultured gamma proteobacterium
g_test	inactive chimneys vs other sites	HQ673115.1.1376	2704.21	0	9	0.00749291	0.00757951	0.00432317	0.00562207	0.000165885	0.000162985	0	0	0	0	2.7478e-06	1.67985e-06	4.00424e-06	Bacteria;Proteobacteria;Alphaproteobacteria;SAR11 clade;Surface 1;uncultured bacterium;uncultured bacterium
g_test	inactive chimneys vs other sites	AY548992.1.1461	2702.45	0	9	1.70223e-05	1.48069e-05	0.000268596	1.25914e-06	0.00586607	0.0369126	0	0	0	0.000198807	0.00109637	1.67985e-06	0	Bacteria;Fusobacteria;Fusobacteriia;Fusobacteriales;Fusobacteriaceae;Psychrilyobacter;uncultured bacterium
g_test	inactive chimneys vs other sites	GQ351162.1.1515	2652	0	9	0.00564831	0.00855183	0.00502274	0.00524937	0.000152662	7.61779e-05	0	0	0	0	1.3739e-06	1.67985e-06	2.00212e-06	Bacteria;Proteobacteria;Gammaproteobacteria;Salinisphaerales;Salinisphaeraceae;ZD0417 marine group
g_test	inactive chimneys vs other sites	AB476180.1.1417	2627.54	0	8	0	0	8.54623e-06	0	4.80825e-05	0.000113381	3.43139e-06	0	0	0.000241561	0.00760043	1.67985e-06	0.00465894	Bacteria;Proteobacteria;Alphaproteobacteria;OCS116 clade;uncultured bacterium;uncultured bacterium;uncultured bacterium
g_test	inactive chimneys vs other sites	New.ReferenceOTU552	2605.82	0	5	0	0	1.22089e-06	0	0	3.54316e-06	0	0	0	3.42034e-05	0.0102548	9.74313e-05	0	Bacteria;Proteobacteria;Gammaproteobacteria;Thiotrichales;Piscirickettsiaceae;endosymbionts;uncultured bacterium
g_test	inactive chimneys vs other sites	New.ReferenceOTU1208	2599.7	0	6	0	0	4.88356e-06	0	2.40413e-06	3.54316e-06	0	0	0	0	1.23651e-05	8.39925e-06	0.015076	Bacteria;Proteobacteria;Gammaproteobacteria;Oceanospirillales;Alcanivoracaceae;Kangiella;uncultured bacterium
g_test	inactive chimneys vs other sites	GQ349546.1.1352	2584.96	0	13	3.09496e-06	4.93565e-06	4.63938e-05	3.77743e-06	0.00329005	0.000627139	0.00895763	0.0248261	8.01348e-06	0.000895701	0.000185477	1.67985e-06	5.40573e-05	Bacteria;Proteobacteria;Epsilonproteobacteria;Campylobacterales;Helicobacteraceae;Sulfurimonas;uncultured epsilon proteobacterium
g_test	inactive chimneys vs other sites	JN662285.1.1386	2551.69	0	12	1.54748e-06	4.93565e-06	0.000166041	2.51829e-06	0.00911525	0.00060588	0.0141974	0.00107342	0.000470792	4.48919e-05	1.64868e-05	1.67985e-06	0	Bacteria;Proteobacteria;Epsilonproteobacteria;Campylobacterales;Helicobacteraceae;Sulfurovum
g_test	inactive chimneys vs other sites	New.ReferenceOTU1008	2534.22	0	8	0	0	0	1.25914e-06	1.32227e-05	4.07463e-05	0.000118383	2.57622e-05	0	0.00255884	0.00895784	1.67985e-06	0	Bacteria;Proteobacteria;Gammaproteobacteria;Order Incertae Sedis;Family Incertae Sedis;Marinicella;uncultured bacterium
g_test	inactive chimneys vs other sites	FN562824.1.1388	2506.25	0	7	0	0	2.44178e-06	0	1.20206e-06	3.54316e-05	0	0	0	9.40593e-05	0.0100075	3.3597e-06	1.00106e-05	Bacteria;Proteobacteria;Gammaproteobacteria;Order Incertae Sedis;Family Incertae Sedis;Marinicella;uncultured gamma proteobacterium
g_test	inactive chimneys vs other sites	FJ497494.1.1450	2496.66	0	5	0	0	6.10445e-06	0	0	3.54316e-06	0	0	0	0	2.7478e-06	3.3597e-06	0.0144914	Bacteria;Bacteroidetes;Flavobacteriia;Flavobacteriales;Flavobacteriaceae;Maritimimonas;uncultured bacterium
g_test	inactive chimneys vs other sites	AB694346.1.1463	2475.73	0	5	0	0	3.66267e-06	0	3.60619e-06	0	0	0	0	0	5.49561e-06	1.67985e-06	0.0143592	Bacteria;Proteobacteria;Alphaproteobacteria;Rhodospirillales;Rhodospirillaceae;uncultured;uncultured bacterium
g_test	inactive chimneys vs other sites	FN562850.1.1368	2465.39	0	12	0	4.93565e-06	0.0139719	0.00014732	0.00305204	0.00295854	0.000950494	7.38516e-05	0.0013683	4.06165e-05	3.98432e-05	2.01582e-05	6.00637e-06	Bacteria;Proteobacteria;Epsilonproteobacteria;Campylobacterales;Helicobacteraceae;Sulfurovum;uncultured epsilon proteobacterium
g_test	inactive chimneys vs other sites	KC294034.1.1328	2455.36	0	7	3.40446e-05	0.0237438	0.000844855	0.000950653	2.88495e-05	2.65737e-05	0	0	1.00168e-05	0	0	0	0	Bacteria;Proteobacteria;Alphaproteobacteria;Rhodobacterales;Rhodobacteraceae;Paracoccus
g_test	inactive chimneys vs other sites	GQ337204.1.1522	2345.84	0	9	0.00493028	0.00609388	0.0039215	0.00641785	0.000135833	0.000115153	0	0	0	0	1.3739e-06	6.7194e-06	2.00212e-06	Bacteria;Deferribacteres;Deferribacteres;Deferribacterales;SAR406 clade(Marine group A);uncultured bacterium;uncultured bacterium
g_test	inactive chimneys vs other sites	New.ReferenceOTU1912	2336.94	0	10	0	0	6.10445e-06	0	7.6932e-05	0.000540332	1.02942e-05	8.58739e-06	2.00337e-06	0.00301204	0.00860475	6.7194e-06	0.000182193	Bacteria;Proteobacteria;Alphaproteobacteria;Rhodobacterales;Rhodobacteraceae
g_test	inactive chimneys vs other sites	DQ395426.1.1417	2315.44	0	7	0	0	1.22089e-05	0	3.60619e-06	1.94874e-05	0	0	0	0.00010261	0.00922438	1.67985e-06	4.80509e-05	Bacteria;Proteobacteria;Alphaproteobacteria;Caulobacterales;Hyphomonadaceae;uncultured
g_test	inactive chimneys vs other sites	New.ReferenceOTU2421	2313.35	0	6	0	0	0	0	0	0.000301169	6.86277e-06	1.71748e-06	0.0330035	0.000188119	3.15997e-05	0	0	Bacteria;Aquificae;Aquificae;Aquificales;Desulfurobacteriaceae;Desulfurobacterium
g_test	inactive chimneys vs other sites	New.ReferenceOTU1138	2298.59	0	7	0	0	3.66267e-06	0	0	1.59442e-05	0	0	7.01179e-05	0.00116719	0.00718001	0.00175208	6.00637e-06	Bacteria;Proteobacteria;Gammaproteobacteria;Chromatiales;Ectothiorhodospiraceae;Acidiferrobacter;uncultured bacterium
g_test	inactive chimneys vs other sites	FJ640814.1.1486	2285.36	0	6	0	0	3.66267e-06	0	0	3.72032e-05	0	0	0	2.77902e-05	0.00423162	0.00406524	0.00237652	Bacteria;Bacteroidetes;Cytophagia;Cytophagales;Flammeovirgaceae;Reichenbachiella;uncultured Bacteroidetes bacterium
g_test	inactive chimneys vs other sites	EU802936.1.1504	2269.34	0	9	0.00206744	3.94852e-05	0.00387266	0.00872208	0.00309651	0.00166883	0	0	0	0	6.86951e-06	8.39925e-06	2.00212e-06	Bacteria;Proteobacteria;Gammaproteobacteria;Alteromonadales;Idiomarinaceae;Idiomarina
g_test	inactive chimneys vs other sites	New.ReferenceOTU1525	2256.96	0	8	0	0	2.44178e-06	1.25914e-06	0	1.41726e-05	0	0	3.60607e-05	0.00156908	0.00648344	0.00198558	2.00212e-06	Bacteria;Bacteroidetes;Cytophagia;Cytophagales;Flammeovirgaceae
g_test	inactive chimneys vs other sites	CP002683.864391.865952	2250.39	0	6	0	0	0	0	0	7.08632e-06	8.57846e-06	6.86991e-06	0.0307838	7.05445e-05	1.51129e-05	0	0	Bacteria;Thermodesulfobacteria;Thermodesulfobacteria;Thermodesulfobacteriales;Thermodesulfobacteriaceae;Thermodesulfatator
g_test	inactive chimneys vs other sites	FJ497633.1.1450	2212.75	0	5	0	0	6.10445e-06	0	4.80825e-06	0	0	0	0	0	1.23651e-05	1.34388e-05	0.0128416	Bacteria;Proteobacteria;Gammaproteobacteria;Chromatiales;Ectothiorhodospiraceae;Acidiferrobacter;uncultured gamma proteobacterium
g_test	inactive chimneys vs other sites	AB095118.1.1050	2190.77	0	6	0	0	4.02894e-05	0	0	0.000363174	1.71569e-06	0.000219837	0.0282816	2.56525e-05	0	0	0	Archaea;Euryarchaeota;Methanococci;Methanococcales;Methanocaldococcaceae;Methanocaldococcus
g_test	inactive chimneys vs other sites	GU474896.10068.11529	2167.71	0	10	0.00460531	0.00821621	0.00429021	0.00314282	0.000153864	8.14927e-05	1.71569e-06	0	0	0	1.3739e-06	1.67985e-06	2.00212e-06	Bacteria;Acidobacteria;Acidobacteria;Subgroup 6;uncultured bacterium;uncultured bacterium;uncultured bacterium
g_test	inactive chimneys vs other sites	GQ337165.1.1513	2145.46	0	10	0.00646848	0.00311604	0.00669902	0.00305342	0.000185118	8.50358e-05	0	0	2.00337e-06	0	5.49561e-06	1.00791e-05	4.00424e-06	Bacteria;Deferribacteres;Deferribacteres;Deferribacterales;SAR406 clade(Marine group A);uncultured Marinimicrobia bacterium;uncultured Marinimicrobia bacterium
g_test	inactive chimneys vs other sites	FJ905684.1.1378	2145.19	0	13	2.78547e-05	2.63235e-05	0.000527424	6.29571e-06	0.00903711	0.0359064	0.00114951	0.000561615	0.000631061	0.0556681	0.00899081	3.3597e-05	8.60913e-05	Bacteria;Proteobacteria;Epsilonproteobacteria;Campylobacterales;Helicobacteraceae;Sulfurovum;uncultured bacterium
g_test	inactive chimneys vs other sites	New.ReferenceOTU677	2106.79	0	9	0	0	0.000113543	2.51829e-06	0.00878107	3.54316e-05	0.00890444	0.00206956	5.60944e-05	6.41313e-06	0	6.7194e-06	0	Bacteria;Proteobacteria;Epsilonproteobacteria;Nautiliales;Nautiliaceae;Thioreductor
g_test	inactive chimneys vs other sites	JQ287017.1.1510	2084.47	0	6	0	0	2.44178e-06	0	0	9.92085e-05	0	0	0	0.000508775	0.00508344	1.67985e-06	0.00459087	Bacteria;Verrucomicrobia;Verrucomicrobiae;Verrucomicrobiales;DEV007;uncultured bacterium;uncultured bacterium
g_test	inactive chimneys vs other sites	HQ433411.1.1358	2063.95	0	9	0.00512526	0.00715833	0.00373226	0.00331406	0.000125015	0.000118696	1.71569e-06	0	0	0	2.7478e-06	5.03955e-06	0	Bacteria;Proteobacteria;Alphaproteobacteria;Rhodospirillales;Rhodospirillaceae;uncultured;uncultured bacterium
g_test	inactive chimneys vs other sites	AB476212.1.1464	2033.75	0	9	3.09496e-06	4.93565e-06	4.88356e-06	0	1.20206e-06	1.41726e-05	0	0	0	7.69576e-05	0.00269972	8.39925e-06	0.00789637	Bacteria;Planctomycetes;Planctomycetacia;Planctomycetales;Planctomycetaceae;Bythopirellula;uncultured bacterium
g_test	inactive chimneys vs other sites	New.ReferenceOTU633	2013.63	0	6	0	0	0	0	6.85176e-05	7.08632e-06	0.0224516	3.43496e-06	1.00168e-05	6.41313e-06	0	0	0	Bacteria;Caldiserica;Caldisericia;Caldisericales;Caldisericaceae;Caldisericum
g_test	inactive chimneys vs other sites	New.ReferenceOTU1615	2013.13	0	7	0	0	0	0	3.60619e-06	2.48021e-05	1.02942e-05	1.71748e-06	0.0271477	1.4964e-05	2.7478e-05	0	0	Bacteria;Thermodesulfobacteria;Thermodesulfobacteria;Thermodesulfobacteriales;Thermodesulfobacteriaceae;Thermodesulfatator
g_test	inactive chimneys vs other sites	New.ReferenceOTU1263	2010.56	0	8	0	0	1.34298e-05	2.51829e-06	0.00828702	4.07463e-05	0.0102341	0.000156291	0.000296499	0	4.12171e-06	0	0	Bacteria;Proteobacteria;Epsilonproteobacteria;Nautiliales;Nautiliaceae;Nitratifractor;uncultured bacterium
g_test	inactive chimneys vs other sites	FR852972.1.1536	1986.82	0	7	0	0	0	0	1.08186e-05	3.366e-05	6.86277e-06	6.35467e-05	0.0259917	6.41313e-06	0	5.03955e-06	0	Bacteria;Proteobacteria;Deltaproteobacteria;Desulfovibrionales;Desulfohalobiaceae;Desulfothermus
g_test	inactive chimneys vs other sites	New.ReferenceOTU979	1960.05	0	8	0	0	1.22089e-06	0	3.60619e-06	1.06295e-05	3.43139e-06	0	7.6128e-05	0.00476068	0.0049694	0	4.00424e-06	Bacteria;Proteobacteria;Gammaproteobacteria;Thiotrichales;Piscirickettsiaceae;Marine Methylotrophic Group 3;uncultured gamma proteobacterium
g_test	inactive chimneys vs other sites	JQ611151.1.1378	1951.45	0	8	1.54748e-06	0	1.83133e-05	0	0.000284889	0.000173615	1.54412e-05	3.43496e-06	0.0248177	6.41313e-06	0	0	0	Bacteria;Proteobacteria;Epsilonproteobacteria;Nautiliales;Nautiliaceae;Nitratifractor;uncultured bacterium
g_test	inactive chimneys vs other sites	JX530396.1.1425	1939.9	0	7	0	1.64522e-06	6.10445e-06	0	1.9233e-05	1.59442e-05	0	0	4.60775e-05	0.000128263	0.0078862	0	0	Bacteria;Bacteroidetes;Flavobacteriia;Flavobacteriales;Flavobacteriaceae;uncultured
g_test	inactive chimneys vs other sites	New.ReferenceOTU1324	1870.45	0	5	0	0	2.07551e-05	0	2.28392e-05	0	0	0	0	0	2.06085e-05	1.84784e-05	0.0110417	Bacteria;Proteobacteria;Gammaproteobacteria;Xanthomonadales;Xanthomonadaceae
g_test	inactive chimneys vs other sites	New.ReferenceOTU1444	1869.72	0	5	0	0	1.22089e-06	0	0	0.000182473	0	0	0	4.27542e-05	0.00642711	0.00174872	0	Bacteria;Proteobacteria;Gammaproteobacteria;Methylococcales;IheB2-23;uncultured bacterium;uncultured bacterium
g_test	inactive chimneys vs other sites	EU491713.1.1444	1864.78	0	6	0	0	0	0	4.56784e-05	0.000240935	0	0	0	2.77902e-05	0.0074493	0.000759293	2.80297e-05	Bacteria;Bacteroidetes;Flavobacteriia;Flavobacteriales;Flavobacteriaceae;Maritimimonas
g_test	inactive chimneys vs other sites	New.ReferenceOTU1840	1823.35	0	7	0	0	0	0	0	0.000483641	1.71569e-06	0	0.000162273	0.00659056	0.00423849	1.67985e-06	2.00212e-06	Bacteria;Proteobacteria;Gammaproteobacteria;Methylococcales
g_test	inactive chimneys vs other sites	AY162087.1.1393	1820.47	0	7	0.00349421	0.0111315	0.00129414	0.00173258	0.000295708	0.000258651	0	0	0	0	0	0	2.00212e-06	Bacteria;Bacteroidetes;Flavobacteriia;Flavobacteriales;Flavobacteriaceae;Muricauda
g_test	inactive chimneys vs other sites	New.ReferenceOTU1543	1796.71	0	5	0	0	0	0	0	7.61779e-05	0	0	0	2.13771e-05	0.00733389	1.67985e-06	2.00212e-06	Bacteria;Proteobacteria;Gammaproteobacteria;Methylococcales;Marine Methylotrophic Group 2
g_test	inactive chimneys vs other sites	JN018807.1.1355	1781.13	0	9	0.00547035	0.00440918	0.00373592	0.00289729	0.000144248	5.13758e-05	0	0	0	0	2.7478e-06	5.03955e-06	4.00424e-06	Bacteria;Chloroflexi;SAR202 clade;uncultured bacterium;uncultured bacterium;uncultured bacterium;uncultured bacterium
g_test	inactive chimneys vs other sites	New.ReferenceOTU1287	1770.09	0	10	3.09496e-06	4.93565e-06	0.000117205	0	0.00324196	0.010245	0.00246373	0.000681839	0.00290088	8.55085e-06	2.06085e-05	0	0	Bacteria;BD1-5
g_test	inactive chimneys vs other sites	New.ReferenceOTU1342	1769.19	0	6	0	0	2.44178e-06	0	7.21238e-06	3.54316e-06	0	0	0	0	0.000233563	8.39925e-06	0.00996857	Bacteria;Bacteroidetes;VC2,1 Bac22;uncultured bacterium;uncultured bacterium;uncultured bacterium;uncultured bacterium
g_test	inactive chimneys vs other sites	FN562878.1.1304	1761.39	0	12	1.08324e-05	1.31617e-05	0.000588469	1.25914e-05	0.00470488	0.0188709	0.000564463	0.00021125	0.000396667	0.000376237	0.000328363	0	8.00849e-06	Bacteria;BD1-5;uncultured bacterium;uncultured bacterium;uncultured bacterium;uncultured bacterium;uncultured bacterium
g_test	inactive chimneys vs other sites	KC682834.1.1417	1753.12	0	6	0	0	0	0	4.32743e-05	6.732e-05	0	0	4.00674e-06	0.00100045	0.00648344	0	0.000270287	Bacteria;Proteobacteria;Alphaproteobacteria;Caulobacterales;Hyphomonadaceae;Robiginitomaculum;uncultured bacterium
g_test	inactive chimneys vs other sites	KC682271.1.1447	1708.79	0	7	0	0	0	0	9.97712e-05	3.72032e-05	0.000109804	1.71748e-06	9.81651e-05	0.00847603	0.00216664	0	0	Bacteria;Proteobacteria;Alphaproteobacteria;Rhodobacterales;Rhodobacteraceae;Roseobacter clade NAC11-7 lineage;uncultured alpha proteobacterium
g_test	inactive chimneys vs other sites	AF449223.1.1378	1707.33	0	8	0	0	1.70925e-05	0	0.000329365	0.0010594	5.49022e-05	3.43496e-06	0	0.0128968	0.0010263	0	6.00637e-06	Bacteria;Proteobacteria;Alphaproteobacteria;Rhodobacterales;Rhodobacteraceae;Roseobacter clade NAC11-7 lineage;uncultured alpha proteobacterium
g_test	inactive chimneys vs other sites	JF155704.1.1375	1683.01	0	7	0	2.13878e-05	2.44178e-06	2.14054e-05	0	0	0	0	4.40741e-05	0	4.12171e-06	0.00848325	2.00212e-06	Bacteria;Proteobacteria;Gammaproteobacteria;Pseudomonadales;Moraxellaceae;Enhydrobacter
g_test	inactive chimneys vs other sites	JN662233.1.1483	1676.08	0	10	0	1.64522e-06	4.88356e-06	0	9.61651e-06	0.00335006	0.000108089	0	2.20371e-05	0.000652002	0.00154427	5.03955e-06	0.0133722	Bacteria;Bacteroidetes;Flavobacteriia;Flavobacteriales;Flavobacteriaceae;uncultured Bacteroidetes bacterium;uncultured Bacteroidetes bacterium
g_test	inactive chimneys vs other sites	AY263403.1.1472	1671.67	0	8	0	0	0.000158716	0	0.00863202	8.8579e-06	0.0024603	0.00192186	0.00306916	6.41313e-05	0	1.67985e-06	0	Bacteria;Aquificae;Aquificae;Aquificales;Desulfurobacteriaceae;Thermovibrio
g_test	inactive chimneys vs other sites	KF453783.1.1526	1650.59	0	4	0	0	2.44178e-06	0	0	0	0	0	0	0	2.7478e-06	0.00801121	1.00106e-05	Bacteria;Firmicutes;Bacilli;Bacillales;Planococcaceae;Lysinibacillus
g_test	inactive chimneys vs other sites	GQ348698.1.1326	1627.83	0	8	0.00320948	0.00550325	0.00241858	0.00392979	7.09217e-05	7.97211e-05	0	0	0	0	0	1.67985e-06	2.00212e-06	Bacteria;Proteobacteria;Alphaproteobacteria;SAR11 clade
g_test	inactive chimneys vs other sites	JF320726.1.1466	1618.07	0	8	0	0	1.22089e-06	0	1.32227e-05	0.000210818	3.43139e-06	0	0	0.000649864	0.00605066	1.67985e-06	0.000736781	Bacteria;Proteobacteria;Gammaproteobacteria;Order Incertae Sedis;Family Incertae Sedis;Marinicella;uncultured bacterium
g_test	inactive chimneys vs other sites	JQ287290.1.1486	1608.23	0	9	0	0	2.56387e-05	0	5.16887e-05	0.000542103	3.43139e-06	1.71748e-06	0	0.000265076	0.00396783	3.3597e-06	0.0050954	Bacteria;Bacteroidetes;Flavobacteriia;Flavobacteriales;Flavobacteriaceae
g_test	inactive chimneys vs other sites	New.ReferenceOTU1738	1597.01	0	9	0	0	6.47071e-05	5.03657e-06	0.00706813	0.000366717	0.00568581	0.00119708	0.000584984	2.13771e-06	0	3.3597e-06	0	Bacteria;Proteobacteria;Epsilonproteobacteria;Nautiliales;Nautiliaceae;Thioreductor
g_test	inactive chimneys vs other sites	KF758619.1.1518	1593.98	0	9	0.00444746	0.000733766	0.00702378	0.00208892	2.88495e-05	5.31474e-06	0	0	0	0	1.3739e-05	1.51187e-05	6.00637e-06	Bacteria;Proteobacteria;Gammaproteobacteria;Alteromonadales;Idiomarinaceae;Idiomarina
g_test	inactive chimneys vs other sites	New.ReferenceOTU37	1584.42	0	8	0	0	0	0	3.96681e-05	1.41726e-05	5.14708e-06	0	0.000144243	0.0104278	7.41907e-05	1.67985e-06	6.00637e-06	Bacteria;Proteobacteria;Gammaproteobacteria;Thiotrichales;Thiotrichaceae;uncultured;uncultured bacterium
g_test	inactive chimneys vs other sites	JN442384.1.1396	1581.99	0	4	0	0	0	0	0	3.54316e-06	0	0	0	0.000183843	0.00454487	0.00198894	0	Bacteria;Bacteroidetes;Flavobacteriia;Flavobacteriales;Cryomorphaceae;Cryomorpha;uncultured organism
g_test	inactive chimneys vs other sites	GU220765.1.1464	1567.79	0	8	0	0	3.66267e-06	0	2.64454e-05	3.366e-05	0	1.71748e-06	0	4.27542e-05	0.00123239	5.03955e-06	0.00755201	Bacteria;Proteobacteria;Alphaproteobacteria;OCS116 clade;uncultured bacterium;uncultured bacterium;uncultured bacterium
g_test	inactive chimneys vs other sites	JQ678333.1.1516	1563.05	0	6	0.00349731	0.00362112	0.00346855	0.00345257	7.21238e-05	8.50358e-05	0	0	0	0	0	0	0	Bacteria;Deferribacteres;Deferribacteres;Deferribacterales;SAR406 clade(Marine group A);uncultured bacterium;uncultured bacterium
g_test	inactive chimneys vs other sites	JN662209.1.1349	1561.51	0	13	0.00358706	0.00142311	0.00230748	0.00132588	0.0100192	0.00317467	0.0036956	0.0262259	1.20202e-05	0.00882447	0.000167616	5.03955e-06	0.00010411	Bacteria;Proteobacteria;Epsilonproteobacteria;Campylobacterales;Helicobacteraceae;Sulfurimonas;uncultured bacterium
g_test	inactive chimneys vs other sites	JQ222467.1.914	1551.33	0	9	0.00358087	0.00387942	0.00405702	0.00236719	0.000344992	0.000120467	0	0	0	0	2.7478e-06	5.03955e-06	4.00424e-06	Archaea;Thaumarchaeota;Marine Group I;uncultured marine archaeon;uncultured marine archaeon;uncultured marine archaeon;uncultured marine archaeon
g_test	inactive chimneys vs other sites	New.ReferenceOTU1895	1549.34	0	8	0	3.29043e-06	0.00019168	0	0.000326961	8.68074e-05	0.0165873	7.72865e-05	1.00168e-05	1.28263e-05	0	0	0	Bacteria;Proteobacteria;Epsilonproteobacteria;Campylobacterales;Helicobacteraceae;Sulfurimonas;uncultured bacterium
g_test	inactive chimneys vs other sites	GQ903344.1.1445	1548.26	0	6	0	0	1.22089e-06	0	7.21238e-06	1.41726e-05	0	0	0	2.13771e-05	0.00617019	0	6.80722e-05	Bacteria;Planctomycetes;Phycisphaerae;Phycisphaerales;Phycisphaeraceae;SM1A02;uncultured bacterium
g_test	inactive chimneys vs other sites	JX527407.1.1423	1542.81	0	10	0	1.64522e-06	8.54623e-06	0	3.7264e-05	0.00148636	1.71569e-06	1.71748e-06	0.00018431	0.0127557	0.000509718	0	2.00212e-06	Bacteria;Bacteroidetes;Flavobacteriia;Flavobacteriales;Flavobacteriaceae;uncultured
g_test	inactive chimneys vs other sites	New.ReferenceOTU2391	1540.65	0	9	0	0	9.76712e-06	1.25914e-06	0.000306526	3.72032e-05	0.0169562	8.93089e-05	0.00016027	6.41313e-06	1.64868e-05	0	0	Bacteria;Proteobacteria;Deltaproteobacteria;Desulfurellales;Desulfurellaceae;Hippea
g_test	inactive chimneys vs other sites	KC682751.1.1501	1538.24	0	8	0.00895683	0.00155144	0.00275188	0.00115212	0.000117802	7.97211e-05	0	0	0	0	0	1.67985e-06	2.00212e-06	Bacteria;Proteobacteria;Gammaproteobacteria;Oceanospirillales;SUP05 cluster
g_test	inactive chimneys vs other sites	HQ674169.1.1494	1517.46	0	9	0.00450008	0.00320159	0.00364924	0.00251073	7.21238e-05	5.84621e-05	0	0	0	0	1.3739e-06	1.67985e-06	2.00212e-06	Bacteria;Proteobacteria;Deltaproteobacteria;SAR324 clade(Marine group B);uncultured bacterium;uncultured bacterium;uncultured bacterium
g_test	inactive chimneys vs other sites	New.ReferenceOTU1674	1509.66	0	6	0	0	0	0	0	9.56653e-05	1.71569e-06	1.71748e-06	0.0210073	9.6197e-05	0	1.67985e-06	0	Bacteria;Aquificae;Aquificae;Aquificales;Desulfurobacteriaceae;Desulfurobacterium
g_test	inactive chimneys vs other sites	JF115339.1.1339	1500.64	0	8	1.54748e-06	1.64522e-05	1.58716e-05	3.27377e-05	2.40413e-06	1.77158e-06	0	0	0	0	1.3739e-06	0.00759293	0	Bacteria;Actinobacteria;Actinobacteria;Corynebacteriales;Corynebacteriaceae;Corynebacterium;uncultured bacterium
g_test	inactive chimneys vs other sites	AB057722.1.1392	1495.19	0	6	0	0	6.10445e-06	0	0	0.000462382	5.14708e-06	0	0.0193325	1.4964e-05	4.12171e-06	0	0	Archaea;Euryarchaeota;Methanococci;Methanococcales;Methanococcaceae;uncultured
g_test	inactive chimneys vs other sites	EU802280.1.1361	1493.89	0	6	0.00588353	0.00453586	0.000128193	0.00356086	0.000173097	0.000118696	0	0	0	0	0	0	0	Bacteria;Cyanobacteria;Cyanobacteria;SubsectionI;FamilyI;Prochlorococcus;uncultured bacterium
g_test	inactive chimneys vs other sites	New.ReferenceOTU2054	1487.89	0	4	0	0	0	0	0	1.24011e-05	0	0	0	0	0.00593663	1.67985e-06	1.40149e-05	Bacteria;Bacteroidetes;Flavobacteriia;Flavobacteriales;Flavobacteriaceae;uncultured;uncultured bacterium
g_test	inactive chimneys vs other sites	JQ287301.1.1515	1473.67	0	5	0	0	9.76712e-06	0	9.61651e-06	0	0	0	0	0	1.3739e-05	1.1759e-05	0.00862114	Bacteria;Proteobacteria;Deltaproteobacteria;Bdellovibrionales;Bacteriovoracaceae;uncultured;uncultured bacterium
g_test	inactive chimneys vs other sites	New.ReferenceOTU1024	1470.37	0	6	0	0	1.22089e-06	0	4.80825e-06	0.00010098	0	0	0	4.27542e-06	0.00612073	3.3597e-06	0	Unassigned
g_test	inactive chimneys vs other sites	GQ452887.1.1498	1469.38	0	8	0	0	1.22089e-06	0	3.60619e-06	3.01169e-05	0	1.71748e-06	0	0.000305693	0.00293603	0.00324547	0.000240255	Bacteria;Verrucomicrobia;Verrucomicrobiae;Verrucomicrobiales;DEV007;uncultured bacterium;uncultured bacterium
g_test	inactive chimneys vs other sites	AB181499.1.1451	1461.23	0	9	0	0	1.22089e-05	0	1.68289e-05	5.4919e-05	0.00111348	8.58739e-05	7.41247e-05	0.00563287	0.00435252	1.34388e-05	0	Bacteria;Proteobacteria;Epsilonproteobacteria;Campylobacterales;Helicobacteraceae;Sulfurimonas;uncultured bacterium
g_test	inactive chimneys vs other sites	JF214014.1.1341	1455.87	0	10	1.39273e-05	8.71964e-05	3.54058e-05	5.16249e-05	9.61651e-06	3.366e-05	0	0	9.01516e-05	0	2.7478e-06	0.00799441	2.00212e-06	Bacteria;Actinobacteria;Actinobacteria;Propionibacteriales;Propionibacteriaceae;Propionibacterium;uncultured bacterium
g_test	inactive chimneys vs other sites	New.ReferenceOTU2419	1454.14	0	8	6.18993e-06	0	0.000640967	5.03657e-06	0.0105084	0	0.000212746	3.43496e-06	0.000144243	0	0	1.67985e-06	0	Bacteria;Proteobacteria;Epsilonproteobacteria;Nautiliales;Nautiliaceae;Caminibacter
g_test	inactive chimneys vs other sites	New.ReferenceOTU1934	1444.75	0	7	1.54748e-06	0	6.95907e-05	1.25914e-06	0.00241975	0.00265028	0.00996646	1.20223e-05	0	0	0	0	0	Bacteria;Proteobacteria;Epsilonproteobacteria;Campylobacterales;Helicobacteraceae;Sulfurimonas;uncultured bacterium
g_test	inactive chimneys vs other sites	DQ071289.1.1344	1441.99	0	12	1.08324e-05	3.29043e-06	0.000140402	2.51829e-06	0.00320951	0.012603	0.000104657	0.000386433	2.00337e-06	8.97839e-05	1.3739e-05	3.3597e-06	0	Bacteria;Proteobacteria;Epsilonproteobacteria;Campylobacterales;Campylobacteraceae;Arcobacter;uncultured epsilon proteobacterium
g_test	inactive chimneys vs other sites	New.ReferenceOTU51	1434.31	0	5	0	0	2.44178e-06	0	0	3.366e-05	0	0	0	8.97839e-05	0.00285085	0.00354448	0	Bacteria;Proteobacteria;Gammaproteobacteria
g_test	inactive chimneys vs other sites	FM165250.1.1493	1413.07	0	5	0	0	0	0	0	1.06295e-05	0	0	4.00674e-06	0.000316381	0.00537333	0	0.000116123	Bacteria;Bacteroidetes;Flavobacteriia;Flavobacteriales;Flavobacteriaceae;Lutibacter
g_test	inactive chimneys vs other sites	HQ672692.1.1502	1400.27	0	8	0.00352207	0.00288077	0.00306321	0.00323977	9.4963e-05	3.72032e-05	0	0	0	0	1.3739e-06	6.7194e-06	0	Bacteria;Deferribacteres;Deferribacteres;Deferribacterales;SAR406 clade(Marine group A);uncultured bacterium;uncultured bacterium
g_test	inactive chimneys vs other sites	JQ712408.1.1373	1396.27	0	13	2.63072e-05	9.87129e-06	0.00331471	2.6442e-05	0.0037865	0.00628379	0.001225	0.000589095	0.00016027	5.13051e-05	0.000116782	1.1759e-05	2.00212e-06	Bacteria;Proteobacteria;Epsilonproteobacteria;Campylobacterales;Helicobacteraceae;Sulfurovum;uncultured epsilon proteobacterium
g_test	inactive chimneys vs other sites	New.ReferenceOTU2002	1387.33	0	4	0	0	0	0	0	0	0	0	0	0.000203083	0.00459433	0.000947436	4.00424e-06	Bacteria;Proteobacteria;Gammaproteobacteria;Order Incertae Sedis;Family Incertae Sedis;Marinicella;uncultured bacterium
g_test	inactive chimneys vs other sites	KC682753.1.1434	1386.01	0	8	0.00342613	0.00414101	0.00245399	0.00277389	6.85176e-05	9.38937e-05	0	0	0	0	0	1.67985e-06	2.00212e-06	Bacteria;Proteobacteria;Alphaproteobacteria;SAR11 clade;Surface 1;uncultured bacterium;uncultured bacterium
g_test	inactive chimneys vs other sites	New.ReferenceOTU883	1376.97	0	8	0	0	0.000776486	1.25914e-06	0.00140401	0	0.012365	3.43496e-06	6.01011e-06	4.27542e-06	0	1.67985e-06	0	Bacteria;Proteobacteria;Epsilonproteobacteria;Nautiliales;Nautiliaceae;Caminibacter
g_test	inactive chimneys vs other sites	New.ReferenceOTU2521	1366.21	0	4	0	0	2.44178e-06	0	1.20206e-06	0	0	0	0	0	5.49561e-06	0	0.0079204	Bacteria;Proteobacteria;Gammaproteobacteria;Thiotrichales;Thiotrichaceae;uncultured;uncultured bacterium
g_test	inactive chimneys vs other sites	EF092167.1.1306	1365.1	0	4	0	0	0	0	0	3.54316e-06	0	0	0	2.77902e-05	0.00539531	0	2.40255e-05	Bacteria;Proteobacteria;Alphaproteobacteria;SB1-18;uncultured bacterium;uncultured bacterium;uncultured bacterium
g_test	inactive chimneys vs other sites	New.ReferenceOTU896	1339.88	0	5	0.0134971	6.58086e-06	0	0	3.60619e-06	3.54316e-06	0	0	0	0	0	1.67985e-06	0	Bacteria;Bacteroidetes;Flavobacteriia;Flavobacteriales;Flavobacteriaceae;Salegentibacter
g_test	inactive chimneys vs other sites	DQ396048.1.1517	1338.47	0	6	0.00358087	0.00369351	0.00284956	0.00214558	7.93362e-05	5.4919e-05	0	0	0	0	0	0	0	Bacteria;Proteobacteria;Deltaproteobacteria;Desulfobacterales;Nitrospinaceae;Nitrospina
g_test	inactive chimneys vs other sites	KC682648.1.1480	1329.21	0	5	0	0	0	0	4.80825e-06	0.000127554	0	0	0	9.40593e-05	0.00555056	0	4.00424e-06	Bacteria;Bacteroidetes;Flavobacteriia;Flavobacteriales;Flavobacteriaceae;Lutibacter;uncultured bacterium
g_test	inactive chimneys vs other sites	KC583206.1.1375	1325.81	0	8	0.00289224	0.000233621	0.0080127	0.00010325	5.89011e-05	0	0	0	0	0	2.7478e-06	1.67985e-06	2.00212e-06	Bacteria;Bacteroidetes;Flavobacteriia;Flavobacteriales;Flavobacteriaceae;Leeuwenhoekiella
g_test	inactive chimneys vs other sites	JQ670247.1.1233	1285.58	0	4	0	0	3.66267e-06	0	0	0	0	0	3.00505e-05	0	5.49561e-06	0.0063532	0	Bacteria;Proteobacteria;Alphaproteobacteria;Rhizobiales;Rhizobiaceae;Rhizobium;Rhizobium etli
g_test	inactive chimneys vs other sites	FJ937713.1.1224	1283.64	0	7	0	0	1.22089e-06	0	0	4.78326e-05	1.71569e-06	0	0.000114192	0.00644306	0.00132444	0	2.00212e-06	Bacteria;Proteobacteria;Gammaproteobacteria;Methylococcales;Marine Methylotrophic Group 2;uncultured bacterium;uncultured bacterium
g_test	inactive chimneys vs other sites	AY280410.1.1408	1278.96	0	8	0	0	2.31969e-05	0	0.000643104	6.732e-05	0.010814	0.00264663	6.01011e-06	8.55085e-06	2.7478e-06	0	0	Bacteria;Proteobacteria;Epsilonproteobacteria;Campylobacterales;Campylobacteraceae;Thiofractor;uncultured bacterium
g_test	inactive chimneys vs other sites	AM268715.1.1398	1270.85	0	6	4.64245e-06	1.64522e-06	0.000103776	0	0.00288014	0.0101529	0	6.69817e-05	0	0	0	0	0	Bacteria;Proteobacteria;Epsilonproteobacteria
g_test	inactive chimneys vs other sites	FR853025.1.1494	1268.13	0	8	0	0	1.70925e-05	0	0.000478421	8.50358e-05	0.00722307	0.000243882	0.00704785	6.41313e-06	1.3739e-06	0	0	Bacteria;Deinococcus-Thermus;Deinococci;Thermales;Thermaceae;Oceanithermus;uncultured bacterium
g_test	inactive chimneys vs other sites	FJ192817.1.1458	1263.88	0	7	3.09496e-06	0	2.44178e-06	0	3.60619e-06	0	0	0	0.000206347	0	1.3739e-06	0.00668245	4.00424e-06	Bacteria;Proteobacteria;Betaproteobacteria;Burkholderiales;Comamonadaceae;Delftia;Delftia tsuruhatensis
g_test	inactive chimneys vs other sites	New.ReferenceOTU623	1262.53	0	6	0	0	0.000489577	1.00731e-05	0.00925949	1.77158e-06	0.000142402	8.58739e-06	0	0	0	0	0	Bacteria;Proteobacteria;Epsilonproteobacteria;Nautiliales;Nautiliaceae;Caminibacter;uncultured bacterium
g_test	inactive chimneys vs other sites	JQ032048.1.1222	1259.07	0	10	0.00346017	0.000472177	0.00555016	0.00182702	2.04351e-05	1.77158e-06	0	0	2.00337e-06	0	6.86951e-06	2.18381e-05	4.00424e-06	Bacteria;Proteobacteria;Gammaproteobacteria;Alteromonadales;Idiomarinaceae;Idiomarina
g_test	inactive chimneys vs other sites	New.ReferenceOTU1185	1239.88	0	6	0	0	0	0	2.16371e-05	0.00128971	3.43139e-06	0	0	0.000265076	0.00386479	0.00354281	0	Bacteria;Bacteroidetes;BD2-2;uncultured bacterium;uncultured bacterium;uncultured bacterium;uncultured bacterium
g_test	inactive chimneys vs other sites	New.ReferenceOTU201	1238.01	0	5	0	0	0	0	1.56268e-05	0.000171843	0	0	0	0.000151778	0.00522358	0	6.40679e-05	Bacteria;Proteobacteria;Alphaproteobacteria;Rhodobacterales;Rhodobacteraceae;Leisingera;uncultured bacterium
g_test	inactive chimneys vs other sites	JQ287178.1.1474	1230.52	0	4	0	0	1.46507e-05	0	0	0	0	0	0	0	3.98432e-05	1.51187e-05	0.00714157	Bacteria;Deinococcus-Thermus;Deinococci;Thermales;Thermaceae;Oceanithermus;uncultured bacterium
g_test	inactive chimneys vs other sites	AB238959.1.1410	1228.92	0	7	0	0	4.88356e-06	0	5.04867e-05	0.000263965	0	0	3.8064e-05	0.00156267	0.00463829	1.67985e-06	0	Bacteria;Proteobacteria;Gammaproteobacteria;BD7-8 marine group
g_test	inactive chimneys vs other sites	FJ264745.1.1488	1220.52	0	6	0	0	1.22089e-06	0	8.41444e-06	0.000131097	0	0	0	0.00014964	0.00388127	0	0.00177989	Bacteria;Bacteroidetes;Flavobacteriia;Flavobacteriales;Flavobacteriaceae;uncultured Bacteroidetes bacterium;uncultured Bacteroidetes bacterium
g_test	inactive chimneys vs other sites	New.ReferenceOTU2573	1203.93	0	8	0	0	0.00037115	1.25914e-06	0.00744077	0.000161214	2.40197e-05	0.000774583	0.00159669	0	0	1.67985e-06	0	Bacteria;Proteobacteria;Epsilonproteobacteria;Nautiliales;Nautiliaceae;Caminibacter;uncultured bacterium
g_test	inactive chimneys vs other sites	GQ903355.1.1494	1160.62	0	7	0	0	1.22089e-06	0	8.53465e-05	3.89748e-05	1.71569e-06	0	8.41415e-05	0.0020351	0.00383044	0	0	Bacteria;Proteobacteria;Gammaproteobacteria;Thiotrichales;Piscirickettsiaceae;endosymbionts;uncultured bacterium
g_test	inactive chimneys vs other sites	AY274841.1.1452	1160.4	0	6	0	0	6.10445e-06	0	0.00015146	7.08632e-06	0	0	0.000108182	0.00794374	0.000186851	0	0	Bacteria;Bacteroidetes;Flavobacteriia;Flavobacteriales;Flavobacteriaceae;Ulvibacter
g_test	inactive chimneys vs other sites	FN554145.1.1470	1155.81	0	10	0	0	0.000257608	3.77743e-06	0.00560642	0.00112495	0.00533752	3.77845e-05	0.000106179	0.000160328	1.92346e-05	1.67985e-06	0	Bacteria;Proteobacteria;Epsilonproteobacteria;Campylobacterales;Helicobacteraceae;Sulfurovum
g_test	inactive chimneys vs other sites	New.ReferenceOTU2439	1138.31	0	7	0	0	0	0	2.40413e-06	3.54316e-06	0.00751473	8.2439e-05	0.00661513	3.42034e-05	4.12171e-06	0	0	Bacteria;Bacteroidetes;Flavobacteriia;Flavobacteriales;R103-B20;uncultured bacterium;uncultured bacterium
g_test	inactive chimneys vs other sites	JX527930.1.1425	1122.2	0	10	0.00251156	0.00527621	0.00165553	0.00129062	0.000169491	1.24011e-05	1.71569e-06	0	2.00337e-06	0	0	3.3597e-06	2.00212e-06	Bacteria;Proteobacteria;Gammaproteobacteria;Oceanospirillales;Halomonadaceae;Halomonas;uncultured Halomonas sp,
g_test	inactive chimneys vs other sites	AF332514.1.1497	1117.85	0	7	0	0	2.44178e-06	0	6.01032e-06	0.000200188	8.57846e-06	0.00834007	0.00496635	2.13771e-05	0	0	0	Bacteria;Thermodesulfobacteria;Thermodesulfobacteria;Thermodesulfobacteriales;Thermodesulfobacteriaceae;Caldimicrobium
g_test	inactive chimneys vs other sites	HQ757403.1.1452	1106.5	0	9	3.09496e-06	0	3.66267e-06	3.77743e-06	8.41444e-06	0	1.71569e-06	0	1.20202e-05	0	2.7478e-06	0.00550655	2.00212e-06	Bacteria;Proteobacteria;Gammaproteobacteria;Enterobacteriales;Enterobacteriaceae;Enterobacter
g_test	inactive chimneys vs other sites	JF261523.1.1461	1100.74	0	4	0	0	0	0	0	2.65737e-05	0	0	0.000158266	0.0067402	0.00042591	0	0	Bacteria;Proteobacteria;Gammaproteobacteria;Methylococcales;Marine Methylotrophic Group 2;uncultured bacterium;uncultured bacterium
g_test	inactive chimneys vs other sites	AY531562.1.1495	1100.06	0	6	0	0	0	0	0.000771725	8.68074e-05	0.0112601	0.000154573	0	2.13771e-06	1.23651e-05	0	0	Bacteria;Bacteroidetes;Flavobacteriia;Flavobacteriales;R103-B20;uncultured bacterium;uncultured bacterium
g_test	inactive chimneys vs other sites	HQ674301.1.1476	1094.44	0	8	0.00396465	0.00311604	0.00278729	0.00167592	7.81341e-05	2.83453e-05	0	0	0	0	4.12171e-06	0	0.000148157	Bacteria;Chloroflexi;SAR202 clade;uncultured Chloroflexi bacterium;uncultured Chloroflexi bacterium;uncultured Chloroflexi bacterium;uncultured Chloroflexi bacterium
g_test	inactive chimneys vs other sites	HQ703851.1.1491	1081.61	0	6	0.00572878	0.00111546	0.00334035	0	0	1.77158e-06	0	0	0	0	4.12171e-06	1.67985e-06	0	Bacteria;Bacteroidetes;Flavobacteriia;Flavobacteriales;Flavobacteriaceae;Salegentibacter
g_test	inactive chimneys vs other sites	HQ674203.1.1520	1080.53	0	8	0.00303925	0.00170609	0.00279828	0.00218965	6.49114e-05	4.25179e-05	0	0	0	0	4.12171e-06	0	2.00212e-06	Bacteria;Deferribacteres;Deferribacteres;Deferribacterales;SAR406 clade(Marine group A);uncultured bacterium;uncultured bacterium
g_test	inactive chimneys vs other sites	GQ848410.1.1483	1079.93	0	7	1.70223e-05	0	2.07551e-05	0	8.41444e-06	4.07463e-05	0	0	0	0	6.86951e-06	3.3597e-06	0.00661301	Bacteria;Bacteroidetes;Flavobacteriia;Flavobacteriales;Flavobacteriaceae;uncultured
g_test	inactive chimneys vs other sites	New.ReferenceOTU2355	1076.07	0	7	0	0	1.22089e-06	0	3.60619e-06	7.97211e-05	0	0	0	1.28263e-05	0.00152641	0.00361504	1.00106e-05	Bacteria;Bacteroidetes;Sphingobacteriia;Sphingobacteriales;Saprospiraceae;Lewinella;uncultured bacterium
g_test	inactive chimneys vs other sites	HQ153930.1.1376	1074.41	0	6	0	0	0	0	1.20206e-06	0.000368489	1.71569e-06	0	2.00337e-06	0.00620578	0.00101257	0	0	Bacteria;Proteobacteria;Alphaproteobacteria;Rhizobiales
g_test	inactive chimneys vs other sites	New.ReferenceOTU1608	1057.95	0	7	0	0	2.44178e-06	0	1.44248e-05	1.94874e-05	0	0	0	2.9928e-05	0.00421238	1.67985e-06	0.000138146	Bacteria;Proteobacteria;Alphaproteobacteria;DB1-14;uncultured bacterium;uncultured bacterium;uncultured bacterium
g_test	inactive chimneys vs other sites	JQ712397.1.1378	1033.02	0	6	0	0	8.05787e-05	2.51829e-06	0.00748645	0.000680287	4.11766e-05	1.20223e-05	0	0	0	0	0	Bacteria;Proteobacteria;Epsilonproteobacteria;Campylobacterales;Campylobacteraceae;Arcobacter;uncultured epsilon proteobacterium
g_test	inactive chimneys vs other sites	New.ReferenceOTU2005	1032.53	0	8	0	0	1.22089e-06	1.25914e-06	0.000561364	9.74369e-05	0	0	0	0.00856795	4.12171e-05	1.67985e-06	2.80297e-05	Bacteria;Bacteroidetes;Flavobacteriia;Flavobacteriales;Flavobacteriaceae;Tenacibaculum
g_test	inactive chimneys vs other sites	GQ337263.1.1438	1007.91	0	8	0.00266167	0.00283471	0.00218783	0.00166711	3.7264e-05	4.96042e-05	0	0	0	0	0	3.3597e-06	2.00212e-06	Bacteria;Proteobacteria;Alphaproteobacteria;Rhodospirillales;Rhodospirillaceae;AEGEAN-169 marine group;uncultured alpha proteobacterium
g_test	inactive chimneys vs other sites	New.ReferenceOTU2264	1006.99	0	9	0	0	0.000260049	1.25914e-06	0.00467963	0.00011161	0.00329413	0.000470589	0.000496836	4.27542e-06	0	1.67985e-06	0	Bacteria;Proteobacteria;Epsilonproteobacteria;Nautiliales;Nautiliaceae;Caminibacter
g_test	inactive chimneys vs other sites	New.ReferenceOTU2465	1001.93	0	8	0	3.29043e-06	2.80805e-05	0	0.000332972	0.000193102	0.0105018	3.43496e-06	4.00674e-06	2.13771e-06	0	0	0	Bacteria;Proteobacteria;Epsilonproteobacteria;Campylobacterales;Helicobacteraceae;Sulfurimonas;uncultured bacterium
g_test	inactive chimneys vs other sites	EU050874.1.1386	1000.22	0	7	0	0	1.22089e-06	0	3.60619e-06	1.77158e-06	0	0	0	2.13771e-06	0.000766637	1.67985e-06	0.00470899	Bacteria;Planctomycetes;Phycisphaerae;Phycisphaerales;Phycisphaeraceae;Phycisphaera;uncultured bacterium
g_test	inactive chimneys vs other sites	JQ032177.1.1392	997.771	0	7	0.00886862	2.79687e-05	0.000330861	0.000182576	0.000409904	7.08632e-06	0	0	0	0	0	1.67985e-06	0	Bacteria;Proteobacteria;Gammaproteobacteria;Alteromonadales;Idiomarinaceae;Idiomarina;uncultured bacterium
g_test	inactive chimneys vs other sites	New.ReferenceOTU993	985.213	0	8	0	0	0.000241736	2.51829e-06	0.00739269	1.24011e-05	8.06376e-05	0.000147703	0	0	0	5.03955e-06	2.00212e-06	Bacteria;Proteobacteria;Epsilonproteobacteria;Nautiliales;Nautiliaceae;Caminibacter;uncultured bacterium
g_test	inactive chimneys vs other sites	HQ674365.1.1523	959.59	0	8	0.00280404	0.00175709	0.00246375	0.00174139	6.49114e-05	1.24011e-05	0	0	0	0	5.49561e-06	1.67985e-06	0	Bacteria;Deferribacteres;Deferribacteres;Deferribacterales;SAR406 clade(Marine group A);uncultured bacterium;uncultured bacterium
g_test	inactive chimneys vs other sites	New.ReferenceOTU1257	957.365	0	9	3.09496e-06	0	1.22089e-06	0	8.41444e-06	0.000306483	1.71569e-06	0	0.000182307	0.00573548	0.000989209	8.39925e-06	0	Bacteria;Proteobacteria;Gammaproteobacteria;Methylococcales;IheB2-23;uncultured bacterium;uncultured bacterium
g_test	inactive chimneys vs other sites	JF076235.1.1372	956.676	0	10	4.95194e-05	0.000682765	6.47071e-05	0.00099976	9.61651e-06	0	6.86277e-06	0	0.000136229	0	2.7478e-06	0.00826319	4.00424e-06	Bacteria;Firmicutes;Bacilli;Bacillales;Staphylococcaceae;Staphylococcus
g_test	inactive chimneys vs other sites	GU940889.1.1356	956.361	0	12	3.09496e-05	9.70677e-05	8.54623e-06	6.29571e-06	1.20206e-06	1.77158e-06	6.86277e-06	8.58739e-06	0.000122206	0	2.7478e-06	0.00534864	8.00849e-06	Bacteria;Proteobacteria;Gammaproteobacteria;Pseudomonadales;Pseudomonadaceae;uncultured;uncultured bacterium
g_test	inactive chimneys vs other sites	HE610326.1.1515	938.677	0	10	1.54748e-06	1.64522e-06	0.000122089	1.25914e-06	0.00562085	0.0040764	6.17649e-05	0	0	8.76462e-05	4.94605e-05	1.67985e-06	0	Bacteria;Fusobacteria;Fusobacteriia;Fusobacteriales;Fusobacteriaceae;Psychrilyobacter
g_test	inactive chimneys vs other sites	JN662191.1.1362	937.917	0	11	3.09496e-06	0	5.494e-05	2.51829e-06	0.00586607	0.000139955	0.0020228	8.41564e-05	6.81146e-05	1.06886e-05	2.7478e-06	0	4.00424e-06	Bacteria;Proteobacteria;Epsilonproteobacteria;Campylobacterales;Helicobacteraceae;Sulfurovum;uncultured bacterium
g_test	inactive chimneys vs other sites	GQ360006.1.1437	930.696	0	4	0	0	1.22089e-06	0	0	0	0	0	9.01516e-05	0	0	0.00476406	1.20127e-05	Bacteria;Proteobacteria;Alphaproteobacteria;Rhizobiales;Rhizobiaceae;Rhizobium
g_test	inactive chimneys vs other sites	FJ792087.1.1341	930.241	0	9	1.54748e-06	0	3.05222e-05	1.25914e-06	0.00128621	0.00187965	0.00376251	0.0038523	0	6.41313e-05	8.24341e-06	0	0	Bacteria;BD1-5;uncultured bacterium;uncultured bacterium;uncultured bacterium;uncultured bacterium;uncultured bacterium
g_test	inactive chimneys vs other sites	New.ReferenceOTU331	928.697	0	5	0	0	0	0	0	0.000531474	3.43139e-06	0	7.41247e-05	0.00724898	5.633e-05	0	0	Bacteria;Bacteroidetes;Flavobacteriia;Flavobacteriales;Flavobacteriaceae;Lutibacter
g_test	inactive chimneys vs other sites	EU050875.1.1358	921.051	0	7	0	0	2.44178e-06	0	9.61651e-06	3.01169e-05	0	0	0	0.000386926	0.00316822	1.67985e-06	0.000542575	Bacteria;Planctomycetes;Phycisphaerae;Phycisphaerales;Phycisphaeraceae;SM1A02;uncultured bacterium
g_test	inactive chimneys vs other sites	JX878993.1.1476	919.546	0	8	0.0016883	0.0037478	0.00149925	0.00172754	3.12536e-05	4.96042e-05	0	0	0	0	1.3739e-06	1.67985e-06	0	Bacteria;Proteobacteria;Gammaproteobacteria;E01-9C-26 marine group;uncultured bacterium;uncultured bacterium;uncultured bacterium
g_test	inactive chimneys vs other sites	New.ReferenceOTU2137	918.623	0	6	0	0	0	0	1.56268e-05	5.31474e-06	0.00956842	0.000662947	7.6128e-05	4.27542e-06	0	0	0	Unassigned
g_test	inactive chimneys vs other sites	HM248444.1.1359	905.009	0	4	0	0	2.44178e-06	0	4.80825e-06	0	0	0	0	0	2.7478e-06	0.00443313	0	Bacteria;Proteobacteria;Gammaproteobacteria;Pseudomonadales;Moraxellaceae;Acinetobacter;uncultured Acinetobacter sp,
g_test	inactive chimneys vs other sites	New.ReferenceOTU2518	899.605	0	8	0	0	1.22089e-06	0	2.40413e-06	3.01169e-05	1.71569e-06	0	0	4.48919e-05	0.00358588	6.88739e-05	1.20127e-05	Bacteria;Proteobacteria;Gammaproteobacteria;Order Incertae Sedis;Family Incertae Sedis;Marinicella
g_test	inactive chimneys vs other sites	New.ReferenceOTU2207	898.265	0	5	0	0	2.44178e-06	0	1.20206e-06	0	0	0	0	0	5.08344e-05	3.3597e-06	0.00514545	Unassigned
g_test	inactive chimneys vs other sites	JQ287241.1.1462	895.665	0	6	0	0	1.22089e-06	0	4.80825e-06	1.77158e-06	0	0	0	0	9.61731e-06	1.67985e-06	0.00521753	Bacteria;Proteobacteria;Alphaproteobacteria;Rhizobiales;Hyphomicrobiaceae;uncultured;uncultured bacterium
g_test	inactive chimneys vs other sites	FR852993.1.1458	894.226	0	11	0	1.64522e-06	4.88356e-06	1.25914e-06	0.00128861	3.01169e-05	0.006964	0.00150108	0.000186313	2.35148e-05	2.7478e-06	8.39925e-06	0	Bacteria;Proteobacteria;Epsilonproteobacteria;Campylobacterales;Helicobacteraceae;Sulfurovum
g_test	inactive chimneys vs other sites	JX878931.1.1392	893.697	0	7	0.00233979	0.00259615	0.00142234	0.00193278	3.96681e-05	5.66905e-05	0	0	0	0	0	3.3597e-06	0	Bacteria;Proteobacteria;Alphaproteobacteria;Rickettsiales;S25-593;uncultured bacterium;uncultured bacterium
g_test	inactive chimneys vs other sites	AY627372.1.1519	888.076	0	6	0.00179508	0.00314894	0.00155541	0.0017288	4.20722e-05	2.48021e-05	0	0	0	0	0	0	0	Bacteria;Proteobacteria;Gammaproteobacteria;E01-9C-26 marine group
g_test	inactive chimneys vs other sites	DQ270646.1.1488	882.213	0	6	0	0	0	0	2.28392e-05	8.8579e-06	0	0	0	0.000316381	0.00341415	3.3597e-06	4.00424e-06	Bacteria;Proteobacteria;Alphaproteobacteria;Rhizobiales;Phyllobacteriaceae;Pseudahrensia;uncultured bacterium
g_test	inactive chimneys vs other sites	DQ146934.1.1433	878.79	0	7	1.85698e-05	0	3.66267e-06	0	2.16371e-05	0	0	1.71748e-06	0	0	2.7478e-06	0.00445496	6.00637e-06	Bacteria;Proteobacteria;Gammaproteobacteria;Vibrionales;Vibrionaceae;Photobacterium;Photobacterium leiognathi
g_test	inactive chimneys vs other sites	New.ReferenceOTU1301	875.649	0	4	0	0	4.88356e-06	0	0	0	0	0	0	0	5.49561e-06	1.67985e-06	0.0050914	Bacteria;Proteobacteria;Gammaproteobacteria;Acidithiobacillales;9M32;uncultured bacterium;uncultured bacterium
g_test	inactive chimneys vs other sites	JQ678579.1.1473	867.282	0	8	1.54748e-06	1.64522e-06	0.000200226	0	0.0051881	0.00161922	0.000288236	9.61788e-05	3.00505e-05	0	0	0	0	Bacteria;Proteobacteria;Epsilonproteobacteria;Nautiliales;Nautiliaceae;Caminibacter
g_test	inactive chimneys vs other sites	New.ReferenceOTU2231	865.57	0	7	0	0	0	0	1.20206e-05	5.31474e-05	4.28923e-05	0	2.40404e-05	0.00276192	0.00182592	0.000184784	0	Bacteria;Bacteroidetes;Flavobacteriia;Flavobacteriales;Flavobacteriaceae;uncultured
g_test	inactive chimneys vs other sites	New.ReferenceOTU1441	862.478	0	4	0	0	0	0	2.40413e-06	8.8579e-06	0	0	0	0	2.61041e-05	0	0.00501131	Bacteria;Planctomycetes;Planctomycetacia;Planctomycetales;Planctomycetaceae;Planctomyces;uncultured bacterium
g_test	inactive chimneys vs other sites	HQ673958.1.1430	861.525	0	7	0.00225313	0.00264057	0.00155175	0.0015563	5.04867e-05	2.48021e-05	0	0	0	0	0	0	2.00212e-06	Bacteria;Proteobacteria;Gammaproteobacteria;E01-9C-26 marine group;uncultured bacterium;uncultured bacterium;uncultured bacterium
g_test	inactive chimneys vs other sites	New.ReferenceOTU933	860.51	0	5	0	0	0	0	3.12536e-05	3.89748e-05	3.43139e-06	0	0	4.27542e-06	0.00363534	0	0	Bacteria;Bacteroidetes;Flavobacteriia;Flavobacteriales;Flavobacteriaceae;Maritimimonas;uncultured bacterium
g_test	inactive chimneys vs other sites	New.CleanUp.ReferenceOTU205491	849.917	0	4	0	0	1.22089e-06	0	0	1.94874e-05	0	0	0	5.98559e-05	0.00340178	0	0	Bacteria;Bacteroidetes;Sphingobacteriia;Sphingobacteriales;Saprospiraceae;uncultured;uncultured Bacteroidetes bacterium
g_test	inactive chimneys vs other sites	EF644808.1.1323	842.663	0	5	0	0	0	0	2.76475e-05	1.77158e-05	0	0	0	4.27542e-06	0.00349795	1.67985e-06	0	Bacteria;Proteobacteria;Gammaproteobacteria;Thiotrichales;Thiotrichaceae;uncultured;uncultured bacterium
g_test	inactive chimneys vs other sites	HQ673103.1.1463	839.666	0	7	0.00191733	0.00271461	0.00170558	0.0014329	4.80825e-05	3.18884e-05	0	0	0	0	1.3739e-06	0	0	Bacteria;Proteobacteria;Alphaproteobacteria;Rhodospirillales;AT-s3-44;uncultured bacterium;uncultured bacterium
g_test	inactive chimneys vs other sites	GQ357037.1.1474	836.58	0	11	4.64245e-06	8.22608e-06	5.73818e-05	1.25914e-06	0.00142925	0.0121495	0.00125074	0.000113354	0	4.91674e-05	0.000517961	0	1.00106e-05	Bacteria;Proteobacteria;Epsilonproteobacteria;Campylobacterales;Helicobacteraceae;Sulfurimonas;uncultured bacterium
g_test	inactive chimneys vs other sites	AY251063.1.1482	832.9	0	8	0	0	0.000192901	0	0.000277677	3.01169e-05	0.00821474	0.000295406	0.000266448	2.13771e-06	0	5.03955e-06	0	Bacteria;Proteobacteria;Epsilonproteobacteria;Nautiliales;Nautiliaceae;Nitratifractor;uncultured bacterium
g_test	inactive chimneys vs other sites	AB440165.1.1431	827.35	0	10	0	0	0.000415102	3.77743e-06	0.00147613	0.000474783	9.26474e-05	2.74797e-05	4.00674e-06	0.00602835	0.00301984	0	5.40573e-05	Bacteria;Proteobacteria;Epsilonproteobacteria;Campylobacterales;Helicobacteraceae;Sulfurovum;uncultured bacterium
g_test	inactive chimneys vs other sites	HQ673735.1.1483	819.148	0	9	0.002917	0.00221446	0.00210237	0.00151601	5.28908e-05	5.13758e-05	0	0	0	0	2.7478e-06	1.67985e-06	0.000134142	Bacteria;Proteobacteria;Deltaproteobacteria;Desulfobacterales;Nitrospinaceae;Nitrospina;uncultured bacterium
g_test	inactive chimneys vs other sites	HQ673128.1.1480	813.052	0	10	0.0031677	0.0010332	0.00270915	0.000457069	0.000115398	6.02337e-05	0	0	2.00337e-06	0	2.7478e-06	1.67985e-06	4.00424e-06	Bacteria;Actinobacteria;Acidimicrobiia;Acidimicrobiales;Sva0996 marine group;uncultured bacterium;uncultured bacterium
g_test	inactive chimneys vs other sites	New.ReferenceOTU1489	811.495	0	7	0	0	9.15667e-05	1.25914e-06	0.000418318	0	0.0081015	0.000255904	8.01348e-06	0	1.3739e-06	0	0	Bacteria;Proteobacteria;Epsilonproteobacteria;Nautiliales;Nautiliaceae;Nitratifractor
g_test	inactive chimneys vs other sites	KF906595.1.1486	799.969	0	5	6.18993e-06	1.64522e-06	0	3.77743e-06	0.00474454	0.00220207	0	0	0	0	0	0	0	Bacteria;Proteobacteria;Alphaproteobacteria;Rhodospirillales;Rhodospirillaceae;Thalassospira
g_test	inactive chimneys vs other sites	New.ReferenceOTU1980	798.256	0	5	0	3.29043e-06	0	0	1.68289e-05	0	0.0088993	1.71748e-05	0	2.13771e-06	0	0	0	Bacteria;Bacteroidetes;VC2,1 Bac22;uncultured bacterium;uncultured bacterium;uncultured bacterium;uncultured bacterium
g_test	inactive chimneys vs other sites	AB100006.1.1408	796.686	0	4	0	0	1.22089e-06	0	2.40413e-06	3.54316e-06	0	0	0	0	0.00319295	0	0	Bacteria;Proteobacteria;Gammaproteobacteria;Thiotrichales;Piscirickettsiaceae;endosymbionts;uncultured bacterium
g_test	inactive chimneys vs other sites	New.ReferenceOTU1042	791.714	0	7	0	1.64522e-06	0	0	1.80309e-05	0.00038089	1.71569e-06	0	8.01348e-06	0.00585305	0.000131895	0	0	Bacteria;Proteobacteria;Deltaproteobacteria;Desulfobacterales;Desulfobulbaceae;MSBL7
g_test	inactive chimneys vs other sites	CP001857.1049930.1051439	790.28	0	7	0	0	2.44178e-06	0	0	0.000120467	1.71569e-06	0.00224474	0.00816373	2.13771e-05	1.23651e-05	0	0	Archaea;Euryarchaeota;Archaeoglobi;Archaeoglobales;Archaeoglobaceae;Archaeoglobus
g_test	inactive chimneys vs other sites	HQ673022.1.1510	782.555	0	7	0.000642205	0.00375438	0.000616549	0.00237726	8.41444e-06	2.48021e-05	0	0	0	2.13771e-06	0	0	0	Bacteria;Deferribacteres;Deferribacteres;Deferribacterales;SAR406 clade(Marine group A);uncultured bacterium;uncultured bacterium
g_test	inactive chimneys vs other sites	HQ673248.1.1512	779.863	0	8	0.00172544	0.00192984	0.0016421	0.00183709	3.24557e-05	2.83453e-05	0	0	0	0	1.3739e-06	3.3597e-06	0	Bacteria;Deferribacteres;Deferribacteres;Deferribacterales;SAR406 clade(Marine group A);uncultured bacterium;uncultured bacterium
g_test	inactive chimneys vs other sites	GU584791.1.1388	775.191	0	5	0	0	0	0	1.20206e-06	0.000954881	0	0	0	0.000305693	0.00427421	0	1.20127e-05	Bacteria;Bacteroidetes;Flavobacteriia;Flavobacteriales;Flavobacteriaceae;uncultured Bacteroidetes bacterium;uncultured Bacteroidetes bacterium
g_test	inactive chimneys vs other sites	GQ375274.1.1522	773.473	0	7	0.0017208	0.00238885	0.00102066	0.00203352	2.16371e-05	3.366e-05	0	0	0	0	0	0	2.00212e-06	Bacteria;Deferribacteres;Deferribacteres;Deferribacterales;SAR406 clade(Marine group A);uncultured Marinimicrobia bacterium;uncultured Marinimicrobia bacterium
g_test	inactive chimneys vs other sites	New.ReferenceOTU274	767.697	0	5	0	0	4.88356e-06	0	0	5.31474e-06	0	0	0	0	0.000100295	5.03955e-06	0.00434861	Bacteria;Proteobacteria;Deltaproteobacteria;Desulfobacterales;Nitrospinaceae;Nitrospina;uncultured bacterium
g_test	inactive chimneys vs other sites	KC763867.1.1335	766.679	0	11	6.18993e-06	4.93565e-06	7.32534e-05	1.25914e-06	0.0016288	0.00646981	5.14708e-06	1.37398e-05	0	2.13771e-06	4.12171e-06	1.67985e-06	0	Bacteria;Proteobacteria;Epsilonproteobacteria;Campylobacterales;Helicobacteraceae;Sulfurovum;uncultured epsilon proteobacterium
g_test	inactive chimneys vs other sites	AY187304.1.1493	764.246	0	6	0	0	1.22089e-06	0	1.20206e-06	1.77158e-05	0	0	0	2.13771e-06	4.2591e-05	0.00373599	0	Bacteria;Proteobacteria;Deltaproteobacteria;Desulfuromonadales;Geobacteraceae;Geopsychrobacter
g_test	inactive chimneys vs other sites	New.ReferenceOTU1676	762.113	0	7	0	0	0	0	2.40413e-05	0.000292311	9.26474e-05	0	3.20539e-05	0.00220612	0.00221885	0.000218381	0	Bacteria;Bacteroidetes;Flavobacteriia;Flavobacteriales;Flavobacteriaceae;uncultured;uncultured bacterium
g_test	inactive chimneys vs other sites	JQ287075.1.1525	760.864	0	4	0	0	1.22089e-06	0	5.40928e-05	1.41726e-05	0	0	0	0	0.00325203	0	0	Bacteria;Proteobacteria;Deltaproteobacteria;Desulfobacterales;Desulfobulbaceae;Desulfobulbus;uncultured bacterium
g_test	inactive chimneys vs other sites	New.ReferenceOTU311	760.304	0	5	0	0	1.22089e-06	0	1.08186e-05	5.31474e-06	0	0	0	0	0	1.67985e-06	0.00449877	Bacteria;Proteobacteria;Gammaproteobacteria;Thiotrichales;Thiotrichaceae;uncultured;uncultured gamma proteobacterium
g_test	inactive chimneys vs other sites	New.ReferenceOTU923	759.003	0	6	1.54748e-06	3.29043e-06	8.17996e-05	0	0.00200264	0.00570803	0	0	0	0	0	1.67985e-06	0	Bacteria;Proteobacteria;Epsilonproteobacteria;Campylobacterales;Campylobacteraceae;Arcobacter;uncultured bacterium
g_test	inactive chimneys vs other sites	FJ205256.1.1453	741.509	0	4	0	0	1.22089e-06	0	8.41444e-06	0	0	0	0	0	1.3739e-06	0	0.00435462	Bacteria;Proteobacteria;Alphaproteobacteria;Rhodospirillales;Rhodospirillaceae;uncultured;uncultured alpha proteobacterium
g_test	inactive chimneys vs other sites	New.ReferenceOTU348	741.003	0	5	0	0	0	0	2.88495e-05	1.77158e-05	5.14708e-06	0	0.00988062	1.71017e-05	0	0	0	Bacteria;Thermodesulfobacteria;Thermodesulfobacteria;Thermodesulfobacteriales;Thermodesulfobacteriaceae;Caldimicrobium
g_test	inactive chimneys vs other sites	JN662096.1.1376	740.055	0	4	0	0	3.66267e-06	0	2.40413e-06	8.8579e-06	0	0	0	0	0	0	0.00436262	Bacteria;Actinobacteria;Acidimicrobiia;Acidimicrobiales;OM1 clade;uncultured Gram-positive bacterium;uncultured Gram-positive bacterium
g_test	inactive chimneys vs other sites	New.CleanUp.ReferenceOTU427269	727.421	0	7	0	0	3.66267e-06	0	1.80309e-05	6.90916e-05	1.71569e-06	0	6.41078e-05	0.0048526	0.000115408	0	0	Bacteria;Bacteroidetes;Flavobacteriia;Flavobacteriales;Flavobacteriaceae;Lutibacter;uncultured bacterium
g_test	inactive chimneys vs other sites	New.ReferenceOTU1925	727.42	0	7	0	0	9.64503e-05	1.25914e-06	0.00550064	7.44063e-05	2.40197e-05	6.86991e-06	2.20371e-05	0	0	0	0	Bacteria;Proteobacteria;Epsilonproteobacteria;Nautiliales;Nautiliaceae;Caminibacter;uncultured bacterium
g_test	inactive chimneys vs other sites	HE576793.1.1403	725.301	0	10	1.54748e-06	6.58086e-06	6.10445e-06	0	0.00127058	0.0144401	0.000466668	1.54573e-05	0	0.000164604	0.000798237	1.67985e-06	0	Bacteria;Bacteroidetes;Flavobacteriia;Flavobacteriales;Flavobacteriaceae;uncultured;uncultured Bacteroidetes bacterium
g_test	inactive chimneys vs other sites	New.ReferenceOTU544	719.311	0	6	0	0	0	0	2.16371e-05	3.54316e-06	0.000471815	0.00910092	2.00337e-06	0.000158191	0	0	0	Bacteria;Proteobacteria;Epsilonproteobacteria;Campylobacterales;Helicobacteraceae;Sulfurimonas;uncultured bacterium
g_test	inactive chimneys vs other sites	New.ReferenceOTU1288	716.118	0	4	0	0	1.22089e-06	0	0	3.54316e-06	0	0	0	0	0.00285359	0	1.20127e-05	Bacteria;Proteobacteria;Gammaproteobacteria;Order Incertae Sedis;Family Incertae Sedis;Marinicella;uncultured gamma proteobacterium
g_test	inactive chimneys vs other sites	EF687372.1.1360	714.868	0	5	0	0	1.22089e-06	0	0	1.77158e-06	0	0	0	0.000763163	0.00235899	0	2.00212e-06	Bacteria;Bacteroidetes;Flavobacteriia;Flavobacteriales;Flavobacteriaceae;Maritimimonas
g_test	inactive chimneys vs other sites	HQ672643.1.1480	714.826	0	7	0.00108943	0.00301074	0.000743522	0.00187612	1.44248e-05	4.60611e-05	0	0	0	0	1.3739e-06	0	0	Bacteria;Proteobacteria;Deltaproteobacteria;Desulfobacterales;Nitrospinaceae;Nitrospina;uncultured bacterium
g_test	inactive chimneys vs other sites	New.ReferenceOTU2356	711.961	0	4	0	0	0	0	3.60619e-06	0	0	0	0.000274462	0	2.7478e-06	0.00405012	0	Bacteria;Proteobacteria;Betaproteobacteria;Burkholderiales;Comamonadaceae;Delftia
g_test	inactive chimneys vs other sites	KC682620.1.1420	710.169	0	4	0	0	1.22089e-06	0	1.20206e-06	5.31474e-06	0	0	0	0	0	0	0.0041524	Bacteria;Proteobacteria;Alphaproteobacteria;Rhodobacterales;Rhodobacteraceae
g_test	inactive chimneys vs other sites	AY370187.1.1454	708.419	0	7	0	6.58086e-06	2.44178e-06	0	0	0	0	5.15243e-06	7.41247e-05	0	4.12171e-06	0.00367719	2.00212e-06	Bacteria;Proteobacteria;Alphaproteobacteria;Rhizobiales;Brucellaceae
g_test	inactive chimneys vs other sites	HQ673637.1.1401	702.82	0	7	0.00216183	0.0020121	0.00157251	0.000779409	6.01032e-05	2.83453e-05	0	0	0	0	0	1.67985e-06	0	Bacteria;Planctomycetes;Planctomycetacia;Planctomycetales;Planctomycetaceae;Rhodopirellula
g_test	inactive chimneys vs other sites	HQ433393.1.1417	699.28	0	7	0.00101515	0.00266525	0.000766719	0.00207255	6.01032e-06	2.65737e-05	0	0	0	0	0	1.67985e-06	0	Bacteria;Deferribacteres;Deferribacteres;Deferribacterales;SAR406 clade(Marine group A);uncultured bacterium;uncultured bacterium
g_test	inactive chimneys vs other sites	JN856415.1.1464	699.232	0	7	0	0	4.88356e-06	2.51829e-06	0.00492365	0.00057222	1.71569e-06	1.03049e-05	0.000224377	0	0	0	0	Bacteria;Aquificae;Aquificae;Aquificales;Desulfurobacteriaceae
g_test	inactive chimneys vs other sites	New.ReferenceOTU672	692.633	0	5	0	0	0	0	0	1.94874e-05	1.71569e-06	1.71748e-06	0.00916141	8.55085e-06	0	0	0	Bacteria;Thermodesulfobacteria;Thermodesulfobacteria;Thermodesulfobacteriales;Thermodesulfobacteriaceae;uncultured Thermodesulfobacteriaceae bacterium;uncultured Thermodesulfobacteriaceae bacterium
g_test	inactive chimneys vs other sites	HQ674473.1.1523	692.045	0	7	0.00137416	0.00160902	0.00118793	0.00205744	3.12536e-05	4.25179e-05	0	0	0	0	0	1.67985e-06	0	Bacteria;Deferribacteres;Deferribacteres;Deferribacterales;SAR406 clade(Marine group A);uncultured bacterium;uncultured bacterium
g_test	inactive chimneys vs other sites	AF493686.1.1276	690.392	0	5	0	0	0	0	6.01032e-06	2.30305e-05	0	0	6.61112e-05	0.0041493	0.000291267	0	0	Bacteria;Bacteroidetes;Flavobacteriia;Flavobacteriales;Flavobacteriaceae;Aquimarina
g_test	inactive chimneys vs other sites	JX310176.1.1425	689.425	0	7	1.54748e-06	0	0	0	3.60619e-06	5.66905e-05	0	0	0	1.06886e-05	2.19824e-05	1.67985e-06	0.00418243	Bacteria;Proteobacteria;Alphaproteobacteria;Rhodobacterales;Rhodobacteraceae
g_test	inactive chimneys vs other sites	FJ205264.1.1469	687.379	0	5	0	0	2.44178e-06	0	0	7.08632e-06	0	0	0	0	3.43475e-05	1.67985e-06	0.00397621	Bacteria;Proteobacteria;Deltaproteobacteria;Desulfobacterales;Nitrospinaceae;Nitrospina;uncultured bacterium
g_test	inactive chimneys vs other sites	CP002205.2120484.2121990	686.598	0	11	1.54748e-06	0	1.0988e-05	2.51829e-06	0.00110109	0.00037026	0.00199192	0.00440018	2.00337e-06	2.56525e-05	8.24341e-06	0	1.6017e-05	Bacteria;Proteobacteria;Epsilonproteobacteria;Campylobacterales;Helicobacteraceae;Sulfurimonas
g_test	inactive chimneys vs other sites	HQ674252.1.1529	685.061	0	6	0.00214791	0.00130466	0.00178128	0.000915397	8.53465e-05	2.48021e-05	0	0	0	0	0	0	0	Bacteria;Verrucomicrobia;Arctic97B-4 marine group;uncultured bacterium;uncultured bacterium;uncultured bacterium;uncultured bacterium
g_test	inactive chimneys vs other sites	New.ReferenceOTU1253	682.095	0	7	0	0	0	0	4.80825e-06	1.24011e-05	3.43139e-06	2.91971e-05	0.00902518	8.55085e-06	0	1.67985e-06	0	Bacteria;Proteobacteria;Deltaproteobacteria;Desulfovibrionales;Desulfohalobiaceae;Desulfothermus
g_test	inactive chimneys vs other sites	New.ReferenceOTU1672	680.564	0	6	0	0	0	0	2.40413e-06	0.000198417	0	0	2.60438e-05	0.00206503	0.00180668	0	2.40255e-05	Bacteria;Proteobacteria;Alphaproteobacteria;Rhizobiales;Hyphomicrobiaceae;Filomicrobium;uncultured bacterium
g_test	inactive chimneys vs other sites	AJ567595.1.1519	678.9	0	6	0.00180901	0.00217333	0.00154687	0.000771855	2.88495e-05	3.18884e-05	0	0	0	0	0	0	0	Bacteria;Gemmatimonadetes;Gemmatimonadetes;BD2-11 terrestrial group;uncultured bacterium;uncultured bacterium;uncultured bacterium
g_test	inactive chimneys vs other sites	New.ReferenceOTU2098	676.191	0	6	0	0	0.000242957	0	0.00267699	0	0.00297844	0.000118506	0.000378637	2.13771e-06	0	0	0	Bacteria;Proteobacteria;Epsilonproteobacteria;Nautiliales;Nautiliaceae;Caminibacter;uncultured bacterium
g_test	inactive chimneys vs other sites	JN874001.1.1481	666.147	0	8	0	0	3.54058e-05	0	0.00281764	0.000409235	0.00140515	3.43496e-06	0.00335164	5.55805e-05	4.67127e-05	0	0	Bacteria;Proteobacteria;Epsilonproteobacteria;Campylobacterales;Helicobacteraceae;Sulfurovum;uncultured epsilon proteobacterium
g_test	inactive chimneys vs other sites	AJ567579.1.1507	661.802	0	6	0.00105074	0.00185745	0.00182523	0.00108916	0.000158672	1.77158e-06	0	0	0	0	0	0	0	Bacteria;Proteobacteria;Gammaproteobacteria;Oceanospirillales;Halomonadaceae;Halomonas
g_test	inactive chimneys vs other sites	AB305300.1.1413	661.723	0	4	0	1.64522e-06	0	0.00544327	2.40413e-06	0	0	0	0	0	1.3739e-06	0	0	Bacteria;Proteobacteria;Gammaproteobacteria;Oceanospirillales;Halomonadaceae;Chromohalobacter
g_test	inactive chimneys vs other sites	AB694395.1.1394	658.052	0	4	0	0	1.22089e-06	0	0	5.13758e-05	0	0	0	0	2.47302e-05	0	0.00397421	Bacteria;Bacteroidetes;Cytophagia;Cytophagales;Flammeovirgaceae;uncultured
g_test	inactive chimneys vs other sites	FJ905673.1.1406	652.909	0	7	0	0	2.44178e-06	0	1.9233e-05	0.00123479	0	0	2.00337e-05	0.00308899	0.00148244	0.000974313	0	Bacteria;Proteobacteria;Zetaproteobacteria;Mariprofundales;Mariprofundaceae;Mariprofundus;uncultured bacterium
g_test	inactive chimneys vs other sites	New.ReferenceOTU2050	652.717	0	5	0	0	1.22089e-06	0	3.60619e-06	0	0	0	0	0	5.49561e-06	1.67985e-06	0.00380203	Bacteria;Proteobacteria;Alphaproteobacteria;OCS116 clade;uncultured bacterium;uncultured bacterium;uncultured bacterium
g_test	inactive chimneys vs other sites	HQ674271.1.1518	650.25	0	6	0.000945512	0.00296468	0.000881482	0.00132965	2.40413e-05	2.65737e-05	0	0	0	0	0	0	0	Bacteria;Proteobacteria;Gammaproteobacteria;E01-9C-26 marine group;uncultured bacterium;uncultured bacterium;uncultured bacterium
g_test	inactive chimneys vs other sites	HM798987.1.1430	640.11	0	8	0.00186781	0.00155637	0.00120624	0.00129188	6.01032e-05	4.78326e-05	0	0	0	0	0	3.3597e-06	4.00424e-06	Bacteria;Planctomycetes;Phycisphaerae;Phycisphaerales;Phycisphaeraceae;JL-ETNP-F27;uncultured planctomycete
g_test	inactive chimneys vs other sites	JN018762.1.1343	638.697	0	6	0.00172699	0.00172912	0.00111223	0.00129692	4.20722e-05	1.41726e-05	0	0	0	0	0	0	0	Bacteria;Proteobacteria;Alphaproteobacteria;Rickettsiales;S25-593;uncultured bacterium;uncultured bacterium
g_test	inactive chimneys vs other sites	AY531602.1.1475	638.353	0	12	7.73741e-06	1.31617e-05	9.15667e-05	1.25914e-06	0.00203389	0.017978	0.000291668	2.23272e-05	1.20202e-05	0.000374099	0.00163357	0	1.00106e-05	Bacteria;Proteobacteria;Epsilonproteobacteria;Campylobacterales;Helicobacteraceae;Sulfurovum;uncultured bacterium
g_test	inactive chimneys vs other sites	HQ153847.1.1358	633.793	0	11	3.09496e-06	3.29043e-06	3.78476e-05	1.25914e-06	3.96681e-05	0.00288059	1.37255e-05	8.58739e-06	0.00506652	8.55085e-06	0	3.3597e-06	0	Bacteria;Proteobacteria;Epsilonproteobacteria;Campylobacterales;Helicobacteraceae;Sulfurovum;uncultured bacterium
g_test	inactive chimneys vs other sites	FJ497575.1.1344	632.618	0	6	0	0	3.66267e-06	0	6.01032e-06	0	0	0	0	2.77902e-05	2.7478e-06	5.03955e-06	0.00368991	Bacteria;Proteobacteria;Alphaproteobacteria;Rhodobacterales;Rhodobacteraceae;Pacificibacter;uncultured alpha proteobacterium
g_test	inactive chimneys vs other sites	JN662133.1.1359	632.121	0	10	0	1.64522e-06	2.93013e-05	0	0.00205192	0.00278315	0.00263187	0.000295406	2.40404e-05	0.000109023	3.29736e-05	1.67985e-06	0	Bacteria;Proteobacteria;Epsilonproteobacteria;Campylobacterales;Helicobacteraceae;Sulfurovum;uncultured bacterium
g_test	inactive chimneys vs other sites	New.ReferenceOTU1918	631.92	0	6	0.00139583	0.00197919	0.00124531	0.00115715	5.16887e-05	3.54316e-05	0	0	0	0	0	0	0	Bacteria;Gemmatimonadetes;Gemmatimonadetes;BD2-11 terrestrial group;uncultured bacterium;uncultured bacterium;uncultured bacterium
g_test	inactive chimneys vs other sites	DQ300529.1.1269	629.094	0	7	0.00157843	0.00162054	0.00148582	0.000945616	0.000128621	6.02337e-05	0	0	0	0	0	1.67985e-06	0	Archaea;Thaumarchaeota;Marine Group I;uncultured marine group I thaumarchaeote;uncultured marine group I thaumarchaeote;uncultured marine group I thaumarchaeote;uncultured marine group I thaumarchaeote
g_test	inactive chimneys vs other sites	GU061224.1.1423	627.928	0	10	4.64245e-06	0	9.76712e-06	0	4.44763e-05	0.0015147	9.09317e-05	1.88923e-05	3.00505e-05	0.00329849	0.00244005	0	1.00106e-05	Bacteria;Bacteroidetes;Flavobacteriia;Flavobacteriales;Cryomorphaceae;Fluviicola;uncultured bacterium
g_test	inactive chimneys vs other sites	New.CleanUp.ReferenceOTU317998	627.872	0	6	0	1.64522e-06	3.66267e-05	0	0.00268541	0.00417561	0	0	0	1.28263e-05	4.53388e-05	0	0	Bacteria;Proteobacteria;Gammaproteobacteria;Oceanospirillales;Hahellaceae;Kistimonas
g_test	inactive chimneys vs other sites	FN562823.1.1291	626.833	0	10	3.09496e-06	1.64522e-06	0.00169826	3.65151e-05	0.00094963	0.00984998	9.95102e-05	1.71748e-05	0	0.000262938	0.000520709	0	0	Bacteria;Proteobacteria;Gammaproteobacteria;Thiotrichales;Thiotrichaceae;uncultured;uncultured bacterium
g_test	inactive chimneys vs other sites	AB476274.1.1400	619.942	0	7	0	0	9.76712e-06	0	0.000121408	0.000180701	0	0	0.000156263	0.00467945	0.000280276	0	2.00212e-06	Bacteria;Proteobacteria;Alphaproteobacteria;Caulobacterales;Hyphomonadaceae;Robiginitomaculum;uncultured bacterium
g_test	inactive chimneys vs other sites	FM165252.1.1474	619.509	0	7	0	0	7.32534e-06	0	4.80825e-06	5.4919e-05	0	0	0	1.06886e-05	0.00114446	3.3597e-06	0.00216229	Bacteria;Proteobacteria;Alphaproteobacteria;Rhizobiales;Hyphomicrobiaceae;uncultured;uncultured bacterium
g_test	inactive chimneys vs other sites	New.ReferenceOTU1662	618.358	0	6	0	0	0.00020633	0	0	0.000478326	1.71569e-06	1.71748e-06	0.00769695	3.42034e-05	0	0	0	Unassigned
g_test	inactive chimneys vs other sites	New.ReferenceOTU1120	616.055	0	6	0.00123953	0.00153992	0.00125263	0.00151223	3.48598e-05	1.94874e-05	0	0	0	0	0	0	0	Bacteria;Acidobacteria;Acidobacteria;Subgroup 6;uncultured bacterium;uncultured bacterium;uncultured bacterium
g_test	inactive chimneys vs other sites	GQ848451.1.1498	612.767	0	6	0	0	2.44178e-06	0	2.40413e-06	9.92085e-05	0	0	0	8.1233e-05	0.00262003	0	4.00424e-06	Bacteria;Proteobacteria;Gammaproteobacteria;Order Incertae Sedis;Family Incertae Sedis;Marinicella;uncultured bacterium
g_test	inactive chimneys vs other sites	New.ReferenceOTU2432	612.041	0	7	0	0	1.22089e-05	0	0.000433945	0.000122239	8.57846e-06	0.000434522	0.00666321	0	2.7478e-06	0	0	Bacteria;Proteobacteria;Epsilonproteobacteria;Nautiliales;Nautiliaceae;Nautilia
g_test	inactive chimneys vs other sites	EF644804.1.1314	611.882	0	6	0	0	1.34298e-05	0	2.76475e-05	0.000170072	3.43139e-06	0	0	0.000188119	0.00276017	0	0	Bacteria;Proteobacteria;Alphaproteobacteria;Rhizobiales;Hyphomicrobiaceae;uncultured;uncultured bacterium
g_test	inactive chimneys vs other sites	KC682597.1.1256	610.485	0	11	7.73741e-06	1.64522e-06	6.10445e-06	0	0.000159874	0.000839729	1.37255e-05	6.86991e-06	0	0.000895701	0.00332622	1.67985e-06	2.00212e-06	Bacteria;Proteobacteria;Alphaproteobacteria;Rhodobacterales;Rhodobacteraceae
g_test	inactive chimneys vs other sites	New.ReferenceOTU2320	610.369	0	7	3.09496e-06	1.64522e-06	8.54623e-06	0	0.000193532	0.00698888	0	0	0	1.28263e-05	2.7478e-06	0	0	Bacteria;Candidate division OD1;uncultured bacterium;uncultured bacterium;uncultured bacterium;uncultured bacterium;uncultured bacterium
g_test	inactive chimneys vs other sites	JQ287230.1.1441	608.457	0	6	0	0	0	0	3.48598e-05	0.000147041	0	0	2.80472e-05	0.00285812	0.000987835	0	3.80403e-05	Bacteria;Proteobacteria;Alphaproteobacteria;Caulobacterales;Hyphomonadaceae;Robiginitomaculum;uncultured bacterium
g_test	inactive chimneys vs other sites	New.ReferenceOTU1454	606.197	0	6	0.00167438	0.00158599	0.00121356	0.00107909	4.08701e-05	1.59442e-05	0	0	0	0	0	0	0	Bacteria;Chloroflexi;SAR202 clade;uncultured Chloroflexi bacterium;uncultured Chloroflexi bacterium;uncultured Chloroflexi bacterium;uncultured Chloroflexi bacterium
g_test	inactive chimneys vs other sites	EU774572.1.1342	605.515	0	6	9.28489e-06	0	1.22089e-05	0	0	0	5.14708e-06	0	8.41415e-05	0	1.3739e-06	0.00323707	0	Bacteria;Cyanobacteria;Chloroplast
g_test	inactive chimneys vs other sites	New.ReferenceOTU312	602.826	0	9	0.0017239	0.00192655	0.00116107	0.000963244	3.36578e-05	1.06295e-05	0	0	0	0	1.3739e-06	1.67985e-06	8.00849e-06	Bacteria;Planctomycetes;Pla3 lineage;uncultured bacterium;uncultured bacterium;uncultured bacterium;uncultured bacterium
g_test	inactive chimneys vs other sites	FN562876.1.1277	602.654	0	6	1.54748e-06	0	5.98236e-05	0	0.00430459	1.59442e-05	5.83335e-05	0.000417347	0	0	0	0	0	Bacteria;Proteobacteria;Epsilonproteobacteria;Nautiliales;Nautiliaceae;Caminibacter
g_test	inactive chimneys vs other sites	New.ReferenceOTU105	600.267	0	7	0	0	0	0	1.68289e-05	1.24011e-05	3.43139e-06	3.43496e-06	0.00854437	5.34428e-05	1.3739e-06	0	0	Bacteria;Proteobacteria;Epsilonproteobacteria;Campylobacterales;Helicobacteraceae;Sulfurovum;uncultured bacterium
g_test	inactive chimneys vs other sites	GQ337185.1.1459	598.62	0	7	0.00165426	0.0014774	0.00125996	0.00109671	4.56784e-05	1.41726e-05	0	0	0	0	1.3739e-06	0	0	Bacteria;Chloroflexi;SAR202 clade;uncultured Chloroflexi bacterium;uncultured Chloroflexi bacterium;uncultured Chloroflexi bacterium;uncultured Chloroflexi bacterium
g_test	inactive chimneys vs other sites	AX039566.8.1529	597.507	0	9	1.23799e-05	0	6.10445e-06	2.51829e-06	6.01032e-06	0	0	1.71748e-06	6.21045e-05	0	5.49561e-06	0.00315476	2.00212e-06	Bacteria;Proteobacteria;Gammaproteobacteria;Enterobacteriales;Enterobacteriaceae;Escherichia-Shigella
g_test	inactive chimneys vs other sites	New.ReferenceOTU1297	596.201	0	6	0	0	1.22089e-06	0	0.000174299	1.77158e-06	0.00198162	0.00449808	0	4.27542e-06	0	0	0	Bacteria;Proteobacteria;Epsilonproteobacteria;Nautiliales;Nautiliaceae;uncultured
g_test	inactive chimneys vs other sites	AF449251.1.1429	593.861	0	12	3.09496e-06	1.64522e-06	0.000115984	5.03657e-06	0.00271306	0.000979684	0.00258726	1.03049e-05	2.00337e-06	7.90953e-05	2.7478e-06	5.03955e-06	0	Bacteria;Proteobacteria;Epsilonproteobacteria;Campylobacterales;Helicobacteraceae;Sulfurovum
g_test	inactive chimneys vs other sites	HM798990.1.1422	592.334	0	6	0.0011374	0.00195287	0.000898575	0.00143542	4.20722e-05	3.01169e-05	0	0	0	0	0	0	0	Bacteria;Proteobacteria;Alphaproteobacteria;Rhodospirillales;Rhodospirillaceae;AEGEAN-169 marine group;uncultured bacterium
g_test	inactive chimneys vs other sites	HQ673268.1.1507	592.31	0	7	0.00131691	0.0022194	0.00133809	0.000627053	7.09217e-05	3.89748e-05	0	0	0	0	0	1.67985e-06	0	Bacteria;Planctomycetes;Planctomycetacia;Planctomycetales;Planctomycetaceae;Planctomyces;uncultured bacterium
g_test	inactive chimneys vs other sites	AB293244.1.1335	587.282	0	7	0	0	1.22089e-06	0	2.16371e-05	0.000249793	0	0.00194762	0.00518472	4.27542e-06	0	1.67985e-06	0	Archaea;Crenarchaeota;Thermoprotei;Thermoproteales;Thermoproteaceae;uncultured;uncultured archaeon
g_test	inactive chimneys vs other sites	New.ReferenceOTU304	585.924	0	4	0	0	4.88356e-06	0	0	0	0	0	0	0	8.24341e-06	5.03955e-06	0.00340761	Bacteria;Bacteroidetes;Flavobacteriia;Flavobacteriales;Flavobacteriaceae
g_test	inactive chimneys vs other sites	AF143820.1.1306	583.246	0	4	0	1.64522e-06	0	1.25914e-06	0.00363744	0.00135172	0	0	0	0	0	0	0	Bacteria;Proteobacteria;Alphaproteobacteria;Rhodospirillales;Rhodospirillaceae;Thalassospira
g_test	inactive chimneys vs other sites	New.ReferenceOTU2263	581.425	0	4	0	0	0	0	0	7.08632e-06	0	0	0	4.27542e-06	0.00232876	0	2.00212e-06	Bacteria;Planctomycetes;Phycisphaerae;Phycisphaerales;Phycisphaeraceae;SM1A02
g_test	inactive chimneys vs other sites	JN662165.1.1232	579.31	0	8	0	0	8.54623e-06	0	0.00142685	0.000607652	0.00347771	0.000400172	0.000102172	0	1.3739e-06	5.03955e-06	0	Bacteria;Proteobacteria;Epsilonproteobacteria;Campylobacterales;Helicobacteraceae;Sulfurovum;uncultured epsilon proteobacterium
g_test	inactive chimneys vs other sites	New.ReferenceOTU1938	575.514	0	6	0	0	0	0	0	6.37769e-05	1.71569e-06	3.43496e-06	0.00811565	3.84788e-05	6.86951e-06	0	0	Bacteria;Aquificae;Aquificae;Aquificales;Desulfurobacteriaceae;Desulfurobacterium
g_test	inactive chimneys vs other sites	DQ009451.1.2093	573.696	0	6	0.00103836	0.00214701	0.000885145	0.00125033	3.36578e-05	1.24011e-05	0	0	0	0	0	0	0	Bacteria;Proteobacteria;Gammaproteobacteria;E01-9C-26 marine group;uncultured bacterium;uncultured bacterium;uncultured bacterium
g_test	inactive chimneys vs other sites	New.ReferenceOTU2124	573.053	0	6	0	0	0	0	1.20206e-05	0	0.000312256	3.43496e-06	1.00168e-05	0.00147075	0.00194132	0	0	Bacteria;Bacteroidetes;Flavobacteriia;Flavobacteriales;Flavobacteriaceae;uncultured
g_test	inactive chimneys vs other sites	GU567988.5078.6600	572.765	0	7	0.00132774	0.00163534	0.00125507	0.00099976	6.73155e-05	3.18884e-05	0	0	0	0	1.3739e-06	0	0	Bacteria;Verrucomicrobia;Arctic97B-4 marine group
g_test	inactive chimneys vs other sites	JF747700.1.1509	572.457	0	7	0.00101979	0.00203678	0.00114764	0.0010879	2.88495e-05	3.72032e-05	0	0	0	0	0	1.67985e-06	0	Bacteria;Acidobacteria;Acidobacteria;Subgroup 21;uncultured bacterium;uncultured bacterium;uncultured bacterium
g_test	inactive chimneys vs other sites	AF505744.1.1391	571.847	0	6	0.00109097	0.00249908	0.0010756	0.000667346	9.37609e-05	7.08632e-06	0	0	0	0	0	0	0	Bacteria;Proteobacteria;Gammaproteobacteria;Oceanospirillales;Halomonadaceae;Halomonas;uncultured bacterium
g_test	inactive chimneys vs other sites	HM799046.1.1448	569.907	0	9	0.00182758	0.00131453	0.00138205	0.000722748	5.52949e-05	3.01169e-05	0	1.71748e-06	0	0	1.3739e-06	1.67985e-06	0	Bacteria;Planctomycetes;Phycisphaerae;Phycisphaerales;Phycisphaeraceae;JL-ETNP-F27;uncultured planctomycete
g_test	inactive chimneys vs other sites	AY280414.1.1441	569.845	0	6	0	0	7.44743e-05	0	0.00333573	1.59442e-05	0.00125932	0.000128811	0.000100168	0	0	0	0	Bacteria;Proteobacteria;Epsilonproteobacteria;Nautiliales;Nautiliaceae;Caminibacter;uncultured bacterium
g_test	inactive chimneys vs other sites	JN232988.1.1444	569.118	0	11	5.72568e-05	9.87129e-06	3.2964e-05	0	0.00022719	0.000979684	2.05883e-05	1.71748e-06	0	0.0014793	0.00232464	0.000918878	1.40149e-05	Bacteria;Bacteroidetes;Flavobacteriia;Flavobacteriales;Flavobacteriaceae;Polaribacter
g_test	inactive chimneys vs other sites	HQ672968.1.1501	569.075	0	6	0.00169295	0.00141489	0.000914446	0.001205	4.08701e-05	8.8579e-06	0	0	0	0	0	0	0	Bacteria;Proteobacteria;Gammaproteobacteria;Oceanospirillales;JL-ETNP-Y6
g_test	inactive chimneys vs other sites	New.ReferenceOTU128	568.114	0	8	0	0	4.88356e-06	0	0.00015747	0.000175386	0	1.71748e-06	0	0.000209496	0.00183828	6.7194e-06	0.0014135	Bacteria;Proteobacteria;Gammaproteobacteria;Thiotrichales;Piscirickettsiaceae;uncultured;uncultured bacterium
g_test	inactive chimneys vs other sites	FJ482183.1.1334	567.716	0	6	6.18993e-06	0	1.22089e-06	0	7.09217e-05	2.83453e-05	0	0	0	0	0.00238784	0	0.000242257	Bacteria;Candidate division OD1;uncultured bacterium;uncultured bacterium;uncultured bacterium;uncultured bacterium;uncultured bacterium
g_test	inactive chimneys vs other sites	New.ReferenceOTU2007	564.727	0	5	0	0	1.22089e-06	0	4.80825e-06	7.08632e-06	0	0	0	0.000143227	0.00219962	0	0	Bacteria;Proteobacteria;Gammaproteobacteria;Thiotrichales;Piscirickettsiaceae;Thiomicrospira
g_test	inactive chimneys vs other sites	New.ReferenceOTU555	562.913	0	5	0	1.64522e-06	1.34298e-05	2.51829e-06	0.00435147	4.42895e-05	0	0	0	0	0	0	0	Bacteria;Proteobacteria;Epsilonproteobacteria;Campylobacterales;Helicobacteraceae;Sulfurimonas;uncultured bacterium
g_test	inactive chimneys vs other sites	New.ReferenceOTU2285	562.739	0	4	0	0	2.44178e-06	0	0	3.54316e-06	0	0	0	0	0.000656725	0	0.00233447	Bacteria;Planctomycetes;Phycisphaerae;CCM11a;uncultured planctomycete;uncultured planctomycete;uncultured planctomycete
g_test	inactive chimneys vs other sites	AB476192.1.1399	560.964	0	7	0	0	1.22089e-06	0	6.61135e-05	7.44063e-05	0	0	1.80303e-05	0.000271489	0.0024112	0	2.60276e-05	Bacteria;Proteobacteria;Alphaproteobacteria;Caulobacterales;Hyphomonadaceae;Robiginitomaculum;uncultured bacterium
g_test	inactive chimneys vs other sites	AF355053.1.1456	560.89	0	7	0.00186317	0.00175709	0.000908342	0.000875104	2.88495e-05	1.77158e-05	0	0	0	0	0	0	1.00106e-05	Bacteria;Chloroflexi;SAR202 clade;uncultured bacterium;uncultured bacterium;uncultured bacterium;uncultured bacterium
g_test	inactive chimneys vs other sites	New.ReferenceOTU1479	560.751	0	6	0	0	0	1.25914e-06	1.20206e-06	0	0	0	0	0.000128263	0.00204711	0.00011255	2.60276e-05	Bacteria;Bacteroidetes;Cytophagia;Cytophagales;Flammeovirgaceae;uncultured;uncultured bacterium
g_test	inactive chimneys vs other sites	HQ673060.1.1447	558.452	0	7	0.00144844	0.00160902	0.000995025	0.00106398	4.08701e-05	8.32642e-05	0	0	0	0	1.3739e-06	0	0	Bacteria;Proteobacteria;Alphaproteobacteria;SAR11 clade;Deep 1;uncultured bacterium;uncultured bacterium
g_test	inactive chimneys vs other sites	New.ReferenceOTU787	555.829	0	9	1.54748e-06	0	3.54058e-05	2.51829e-06	0.00207476	0.00162808	0.00117697	0.000589095	1.20202e-05	1.06886e-05	0	0	0	Bacteria;Proteobacteria;Epsilonproteobacteria;Campylobacterales;Campylobacteraceae;Arcobacter;uncultured epsilon proteobacterium
g_test	inactive chimneys vs other sites	New.ReferenceOTU1760	555.751	0	4	0	0	1.22089e-06	0	0	0	0	0	0	0	1.3739e-06	0.00270288	2.00212e-06	Bacteria;Actinobacteria;Actinobacteria;Micrococcales;Micrococcaceae;Arthrobacter;Arthrobacter agilis
g_test	inactive chimneys vs other sites	New.ReferenceOTU36	553.241	0	10	0	3.29043e-06	0.00110857	1.88871e-05	0.00211563	0.00448387	0.000456374	1.88923e-05	8.01348e-05	0.00040189	3.57214e-05	0	0	Bacteria;BD1-5;uncultured bacterium;uncultured bacterium;uncultured bacterium;uncultured bacterium;uncultured bacterium
g_test	inactive chimneys vs other sites	AB476215.1.1407	551.75	0	5	0	0	0	0	6.01032e-06	1.94874e-05	0	0	0	0.000222322	0.0021213	0	1.00106e-05	Bacteria;Planctomycetes;Planctomycetacia;Planctomycetales;Planctomycetaceae;Planctomyces;uncultured bacterium
g_test	inactive chimneys vs other sites	New.ReferenceOTU630	548.964	0	6	0	0	7.32534e-06	0	0.000651518	0.000547418	0.0018701	0.00351911	0	6.41313e-05	0	0	0	Bacteria;BD1-5;uncultured bacterium;uncultured bacterium;uncultured bacterium;uncultured bacterium;uncultured bacterium
g_test	inactive chimneys vs other sites	FN553485.1.1507	548.476	0	4	0	0	1.22089e-06	0	0	0	0	0	0	0	1.3739e-06	1.67985e-06	0.00317937	Bacteria;Candidate division BRC1
g_test	inactive chimneys vs other sites	AY726830.1.1205	547.612	0	8	0.000750529	5.26469e-05	0.000783811	0.00224883	0.000759704	4.96042e-05	0	0	0	0	0	1.67985e-06	2.00212e-06	Bacteria;Proteobacteria;Gammaproteobacteria;Alteromonadales;Alteromonadaceae;Alteromonas;uncultured bacterium
g_test	inactive chimneys vs other sites	New.ReferenceOTU1739	545.96	0	6	0	0	6.47071e-05	0	9.61651e-06	1.06295e-05	0	0	0	1.92394e-05	0.0024057	0	1.20127e-05	Bacteria;Proteobacteria;Alphaproteobacteria;DB1-14;uncultured alpha proteobacterium;uncultured alpha proteobacterium;uncultured alpha proteobacterium
g_test	inactive chimneys vs other sites	GQ350778.1.1321	543.813	0	4	0	0	2.1976e-05	0	0	0	0	0	0	0	1.3739e-06	1.67985e-06	0.00327147	Bacteria;Chloroflexi;JG30-KF-CM66;uncultured Chloroflexi bacterium;uncultured Chloroflexi bacterium;uncultured Chloroflexi bacterium;uncultured Chloroflexi bacterium
g_test	inactive chimneys vs other sites	KC682764.1.1500	540.909	0	7	0.00158462	0.00152182	0.00123554	0.000696306	2.28392e-05	1.41726e-05	0	0	0	0	0	1.67985e-06	0	Bacteria;Planctomycetes;Pla3 lineage;uncultured bacterium;uncultured bacterium;uncultured bacterium;uncultured bacterium
g_test	inactive chimneys vs other sites	JQ287330.1.1502	539.684	0	5	0	0	1.22089e-06	0	6.01032e-06	2.1259e-05	0	0	0	0	2.7478e-06	0	0.00324744	Bacteria;Proteobacteria;Gammaproteobacteria
g_test	inactive chimneys vs other sites	New.ReferenceOTU1995	538.311	0	4	0	3.29043e-06	0	0.00453921	8.41444e-06	0	0	0	0	0	8.24341e-06	0	0	Bacteria;Proteobacteria;Gammaproteobacteria;Oceanospirillales;Halomonadaceae;Chromohalobacter
g_test	inactive chimneys vs other sites	FJ497430.1.1448	537.083	0	4	0	0	1.22089e-06	0	0	1.06295e-05	0	0	0	0	0	1.67985e-06	0.00316335	Bacteria;Bacteroidetes;Flavobacteriia;Flavobacteriales;Flavobacteriaceae;Maritimimonas;uncultured bacterium
g_test	inactive chimneys vs other sites	New.ReferenceOTU1794	533.006	0	8	0	0	3.90685e-05	2.51829e-06	0.00394277	1.24011e-05	6.51963e-05	0.000254187	6.01011e-06	0	0	3.3597e-06	0	Bacteria;Proteobacteria;Epsilonproteobacteria;Nautiliales;Nautiliaceae;Caminibacter;uncultured bacterium
g_test	inactive chimneys vs other sites	New.ReferenceOTU1718	532.931	0	7	1.54748e-06	0	2.31969e-05	0	0.00391632	0.00080784	0	0	0	0	1.64868e-05	1.67985e-06	8.00849e-06	Bacteria;Proteobacteria;Epsilonproteobacteria;Campylobacterales;Helicobacteraceae;Sulfurimonas
g_test	inactive chimneys vs other sites	DQ300546.1.1231	532.261	0	6	0.00194519	0.000514953	0.0019754	0.000234201	6.97197e-05	4.96042e-05	0	0	0	0	0	0	0	Archaea;Euryarchaeota;Thermoplasmata;Thermoplasmatales;Marine Group II;uncultured marine group II euryarchaeote;uncultured marine group II euryarchaeote
g_test	inactive chimneys vs other sites	HQ433383.1.1398	529.213	0	7	0.00108943	0.00176696	0.000615328	0.00143794	2.04351e-05	4.25179e-05	0	0	0	0	1.3739e-06	0	0	Bacteria;Proteobacteria;Gammaproteobacteria;Methylococcales;IheB2-23;uncultured bacterium;uncultured bacterium
g_test	inactive chimneys vs other sites	New.ReferenceOTU2484	527.674	0	7	1.54748e-05	0	6.83698e-05	0	0.00207476	0.00139246	0.00139314	0.000111636	0	0	0	1.67985e-06	0	Bacteria;Proteobacteria;Epsilonproteobacteria;Campylobacterales;Campylobacteraceae;Arcobacter
g_test	inactive chimneys vs other sites	AY770963.1.1477	527.178	0	6	1.85698e-05	0	7.20325e-05	2.51829e-06	0.00399446	5.31474e-05	1.71569e-06	0	0	0	0	0	0	Bacteria;Proteobacteria;Gammaproteobacteria;Pseudomonadales;Pseudomonadaceae;Pseudomonas;uncultured bacterium
g_test	inactive chimneys vs other sites	New.ReferenceOTU20	524.614	0	5	0	0	0	0	2.40413e-06	0.000219676	0	0	4.80809e-05	0.00065414	0.00214466	0	0	Bacteria;Proteobacteria;Alphaproteobacteria;Rhizobiales;Rhodobiaceae;Rhodobium;uncultured bacterium
g_test	inactive chimneys vs other sites	New.ReferenceOTU911	524.59	0	7	0	0	0	0	0.000193532	0.00017893	0.00624684	8.58739e-06	4.00674e-06	2.13771e-06	4.94605e-05	0	0	Bacteria;Proteobacteria;Deltaproteobacteria;Desulfobacterales;Desulfobulbaceae;Desulfobulbus;uncultured delta proteobacterium
g_test	inactive chimneys vs other sites	New.ReferenceOTU246	515.633	0	7	0.000855758	0.00177025	0.000808229	0.00134225	1.9233e-05	4.25179e-05	0	0	0	0	2.7478e-06	0	0	Unassigned
g_test	inactive chimneys vs other sites	New.ReferenceOTU2232	515.009	0	6	0	0	3.66267e-06	0	4.80825e-06	2.48021e-05	0	0	0	0	4.12171e-06	8.39925e-06	0.0031093	Bacteria;Bacteroidetes;Flavobacteriia;Flavobacteriales;Flavobacteriaceae;Lutibacter;uncultured Bacteroidetes bacterium
g_test	inactive chimneys vs other sites	EU265970.1.1470	514.519	0	12	6.03518e-05	2.79687e-05	0.000129414	2.89603e-05	0.00384901	0.00112672	0.000166422	0.00016316	0	0.00010261	3.57214e-05	1.67985e-06	2.00212e-06	Bacteria;Proteobacteria;Epsilonproteobacteria;Campylobacterales;Helicobacteraceae;Sulfurimonas;uncultured bacterium
g_test	inactive chimneys vs other sites	AJ441203.1.1422	512.896	0	10	0	0	0.00224155	5.03657e-05	0.000679166	0.0017893	5.14708e-06	3.09146e-05	7.21213e-05	2.13771e-06	9.61731e-06	3.3597e-06	0	Bacteria;Proteobacteria;Epsilonproteobacteria;Campylobacterales;Helicobacteraceae;Sulfurovum;uncultured epsilon proteobacterium
g_test	inactive chimneys vs other sites	EU050746.1.1394	508.057	0	5	0	0	0	0	1.20206e-06	1.06295e-05	0	0	0	9.19216e-05	0.00199491	0	4.00424e-06	Bacteria;Proteobacteria;Alphaproteobacteria;Rhodobacterales;Rhodobacteraceae;Pacificibacter;uncultured alpha proteobacterium
g_test	inactive chimneys vs other sites	New.ReferenceOTU407	507	0	4	0	0	0	0	1.80309e-05	0	0	0	0	0	0.000931505	1.67985e-06	0.00168378	Bacteria;Candidate division OD1;uncultured bacterium;uncultured bacterium;uncultured bacterium;uncultured bacterium;uncultured bacterium
g_test	inactive chimneys vs other sites	New.CleanUp.ReferenceOTU21897	505.333	0	5	0	0	0	0	2.40413e-06	3.54316e-06	3.94609e-05	0.00567283	0	4.27542e-06	0	0	0	Bacteria;Proteobacteria;Epsilonproteobacteria;Campylobacterales;Helicobacteraceae;Sulfurovum
g_test	inactive chimneys vs other sites	GQ389781.1.1386	501.3	0	4	0	0	0.000227085	3.77743e-06	0.00356652	0.000182473	0	0	0	0	0	0	0	Bacteria;Proteobacteria;Alphaproteobacteria;Rhodobacterales;Rhodobacteraceae;Oceanicola
g_test	inactive chimneys vs other sites	New.ReferenceOTU981	500.863	0	4	0	0	1.58716e-05	0	0	0	0	0	0	0	8.24341e-06	1.84784e-05	0.00296114	Bacteria;Proteobacteria;Gammaproteobacteria
g_test	inactive chimneys vs other sites	FJ746117.1.1384	498.22	0	6	0.0012937	0.00149221	0.000991362	0.000804592	3.12536e-05	3.366e-05	0	0	0	0	0	0	0	Bacteria;Chloroflexi;SAR202 clade
g_test	inactive chimneys vs other sites	JQ678423.1.1356	494.072	0	11	0.00308723	0.000539631	0.000538412	0.000647199	0.000212765	0.000207275	0	0	4.00674e-06	6.41313e-06	8.24341e-06	5.03955e-06	2.60276e-05	Bacteria;Proteobacteria;Gammaproteobacteria;Oceanospirillales;SUP05 cluster;uncultured bacterium;uncultured bacterium
g_test	inactive chimneys vs other sites	HQ672845.1.1517	492.521	0	6	0.00129679	0.00145273	0.000954736	0.000834812	3.36578e-05	1.41726e-05	0	0	0	0	0	0	0	Bacteria;Proteobacteria;Gammaproteobacteria;E01-9C-26 marine group;uncultured bacterium;uncultured bacterium;uncultured bacterium
g_test	inactive chimneys vs other sites	New.ReferenceOTU2365	492.128	0	6	0	0	0	1.25914e-06	1.9233e-05	0	1.37255e-05	8.58739e-06	0.00639876	2.13771e-06	0	0	0	Bacteria;Proteobacteria;Epsilonproteobacteria;Nautiliales;Nautiliaceae;Nitratifractor;uncultured bacterium
g_test	inactive chimneys vs other sites	New.ReferenceOTU2097	491.805	0	6	0	0	1.22089e-05	0	0.000632285	0.00220916	0	8.41564e-05	0.00282475	4.27542e-06	0	0	0	Bacteria;BD1-5
g_test	inactive chimneys vs other sites	FJ615179.1.1440	489.192	0	7	0.00130762	0.00150044	0.00125385	0.000498621	3.7264e-05	2.48021e-05	0	0	0	0	2.7478e-06	0	0	Bacteria;Actinobacteria;Acidimicrobiia;Acidimicrobiales;Sva0996 marine group;uncultured actinobacterium;uncultured actinobacterium
g_test	inactive chimneys vs other sites	New.ReferenceOTU781	488.918	0	9	1.54748e-06	3.29043e-06	2.44178e-06	2.51829e-06	0	7.08632e-06	0	0	0	3.84788e-05	0.00109225	1.67985e-06	0.00128336	Bacteria;Planctomycetes;Planctomycetacia;Planctomycetales;Planctomycetaceae;Bythopirellula;uncultured bacterium
g_test	inactive chimneys vs other sites	JQ287263.1.1431	486.093	0	6	0	0	4.88356e-06	0	7.21238e-06	3.54316e-06	0	0	0	0	0.000836706	1.67985e-06	0.00168178	Bacteria;Proteobacteria;Alphaproteobacteria;Caulobacterales;Hyphomonadaceae;uncultured;uncultured bacterium
g_test	inactive chimneys vs other sites	FJ664806.1.1404	483.633	0	4	0	0	0	0	3.60619e-06	1.77158e-05	0	0	0	0	0.00195506	0	4.60488e-05	Bacteria;Proteobacteria;Alphaproteobacteria;Rhodobacterales;Rhodobacteraceae;Roseobacter clade NAC11-7 lineage;uncultured alpha proteobacterium
g_test	inactive chimneys vs other sites	FN554151.1.1500	483.464	0	6	0	0	0	0	6.01032e-06	0.000155899	0	0	0	2.13771e-06	4.39649e-05	1.67985e-06	0.0032054	Bacteria;Proteobacteria;Gammaproteobacteria;Thiotrichales;Thiotrichaceae;uncultured;uncultured sediment bacterium
g_test	inactive chimneys vs other sites	GQ337232.1.1456	473.835	0	7	0.0017208	0.00109078	0.00130269	0.000584242	6.61135e-05	3.54316e-05	0	0	0	0	0	0	4.00424e-05	Bacteria;Proteobacteria;Alphaproteobacteria;Rhodospirillales;Rhodospirillaceae;uncultured;uncultured alpha proteobacterium
g_test	inactive chimneys vs other sites	New.CleanUp.ReferenceOTU234817	473.547	0	7	0	0	0	0	3.24557e-05	1.77158e-05	0	0	3.60607e-05	0.00113512	0.00136291	1.67985e-06	2.00212e-06	Bacteria;Proteobacteria;Gammaproteobacteria;Thiotrichales;Piscirickettsiaceae;endosymbionts;uncultured bacterium
g_test	inactive chimneys vs other sites	HQ674234.1.1446	469.509	0	7	0.0012581	0.00134579	0.000858285	0.000885177	2.76475e-05	3.01169e-05	0	0	0	0	0	1.67985e-06	0	Bacteria;Proteobacteria;Alphaproteobacteria;SAR11 clade;uncultured bacterium;uncultured bacterium;uncultured bacterium
g_test	inactive chimneys vs other sites	JX879045.1.1449	468.954	0	6	0.000945512	0.00157941	0.000731313	0.00107783	1.68289e-05	1.59442e-05	0	0	0	0	0	0	0	Bacteria;Proteobacteria;Alphaproteobacteria;Rhodospirillales;Rhodospirillaceae;AEGEAN-169 marine group;uncultured bacterium
g_test	inactive chimneys vs other sites	New.ReferenceOTU1917	466.075	0	6	0	0	3.66267e-06	0	1.44248e-05	3.72032e-05	0	0	0	0.000245837	0.00183141	0	2.00212e-05	Bacteria;Proteobacteria;Alphaproteobacteria;DB1-14;uncultured bacterium;uncultured bacterium;uncultured bacterium
g_test	inactive chimneys vs other sites	New.ReferenceOTU2318	460.035	0	8	0	0	1.22089e-06	0	3.60619e-06	9.56653e-05	1.71569e-06	0	0	0.000147502	0.00190972	5.03955e-06	6.40679e-05	Bacteria;Proteobacteria;Alphaproteobacteria;Caulobacterales;Hyphomonadaceae;Robiginitomaculum;uncultured bacterium
g_test	inactive chimneys vs other sites	HM798617.1.1456	459.031	0	8	0.00132774	0.00124707	0.00112932	0.000580465	5.16887e-05	3.54316e-06	0	0	0	0	0	3.3597e-06	2.00212e-06	Bacteria;Verrucomicrobia;Arctic97B-4 marine group
g_test	inactive chimneys vs other sites	New.ReferenceOTU2072	457.528	0	7	0.00117454	0.000987129	0.000962061	0.00104761	2.16371e-05	3.89748e-05	0	0	0	0	0	0	4.00424e-06	Bacteria;Deferribacteres;Deferribacteres;Deferribacterales;SAR406 clade(Marine group A);uncultured bacterium;uncultured bacterium
g_test	inactive chimneys vs other sites	GQ337098.1.1445	452.917	0	8	0.000851115	0.00183771	0.000614107	0.000995982	1.44248e-05	2.83453e-05	0	0	0	0	1.3739e-06	1.67985e-06	0	Bacteria;Proteobacteria;Alphaproteobacteria;Rhodospirillales;Rhodospirillaceae;AEGEAN-169 marine group;uncultured bacterium
g_test	inactive chimneys vs other sites	ABEF01044008.1065.2439	450.162	0	6	0.0011993	0.00121417	0.000813112	0.000865031	3.8466e-05	5.13758e-05	0	0	0	0	0	0	0	Bacteria;Proteobacteria;Alphaproteobacteria;SAR11 clade;Deep 1;uncultured bacterium;uncultured bacterium
g_test	inactive chimneys vs other sites	HQ336972.1.1349	443.384	0	5	0	0	8.54623e-06	1.25914e-06	0.00322634	4.96042e-05	0	0	0.000326549	0	0	0	0	Bacteria;Aquificae;Aquificae;Aquificales;Desulfurobacteriaceae
g_test	inactive chimneys vs other sites	New.ReferenceOTU2298	442.354	0	4	0	0	4.88356e-06	0	3.48598e-05	4.96042e-05	0	0	0	0	0.00198666	0	0	Bacteria;Proteobacteria;Gammaproteobacteria;Chromatiales
g_test	inactive chimneys vs other sites	DQ395479.1.1517	440.927	0	8	0	0	2.44178e-06	6.29571e-06	1.20206e-06	1.41726e-05	0	0	0	1.71017e-05	7.83124e-05	0.00205614	8.40891e-05	Bacteria;Proteobacteria;Alphaproteobacteria;Rickettsiales;Rickettsiaceae;Rickettsia
g_test	inactive chimneys vs other sites	EU016173.1.1501	439.546	0	4	0	0	0.00352959	0	0	0	0	0	2.20371e-05	0	1.3739e-06	0	2.00212e-06	Bacteria;Proteobacteria;Gammaproteobacteria;Alteromonadales;Alteromonadaceae;Marinobacter;uncultured bacterium
g_test	inactive chimneys vs other sites	AJ534233.1.1352	439.108	0	5	0	0	0	0	3.60619e-05	0.000104523	6.86277e-06	0	0	0.000365549	0.00182866	0	0	Bacteria;Proteobacteria;Alphaproteobacteria;Rhodobacterales;Rhodobacteraceae;Leisingera;uncultured bacterium
g_test	inactive chimneys vs other sites	AY251060.1.1475	438.157	0	8	0	0	4.88356e-06	0	1.20206e-06	2.83453e-05	0.00266447	0.0015921	0.00114192	2.56525e-05	2.7478e-06	0	0	Bacteria;Proteobacteria;Epsilonproteobacteria;Campylobacterales;Campylobacteraceae;Thiofractor;uncultured bacterium
g_test	inactive chimneys vs other sites	New.ReferenceOTU1055	438.059	0	8	0	0	0.00016482	1.25914e-06	0.00194734	0.000519073	0.000856131	0.00057879	0.00020835	1.71017e-05	0	0	0	Bacteria;Candidate division SR1;uncultured bacterium;uncultured bacterium;uncultured bacterium;uncultured bacterium;uncultured bacterium
g_test	inactive chimneys vs other sites	New.ReferenceOTU2029	437.828	0	4	0	0	0	0	1.20206e-06	1.77158e-06	0	0	0	0	2.7478e-06	0	0.0025487	Bacteria;Proteobacteria;Gammaproteobacteria;Chromatiales;Ectothiorhodospiraceae
g_test	inactive chimneys vs other sites	HQ672571.1.1452	435.081	0	8	0.00115133	0.00119278	0.000842414	0.000876363	1.9233e-05	3.54316e-05	0	0	0	0	2.7478e-06	1.67985e-06	0	Bacteria;Proteobacteria;Alphaproteobacteria;Rhodospirillales;Rhodospirillaceae;Defluviicoccus;uncultured bacterium
g_test	inactive chimneys vs other sites	New.ReferenceOTU1505	434.505	0	4	0	0	1.22089e-06	0	0	0	0	0	0	0	2.7478e-06	8.39925e-06	0.00251066	Bacteria;Proteobacteria;Gammaproteobacteria;Gammaproteobacteria Incertae Sedis;Unknown Family;Thiohalophilus;uncultured bacterium
g_test	inactive chimneys vs other sites	AB189345.1.1469	432.756	0	6	0.001108	0.00148563	0.000920551	0.000526322	1.9233e-05	1.24011e-05	0	0	0	0	0	0	0	Bacteria;Proteobacteria;Alphaproteobacteria;Rhodospirillales;Rhodospirillaceae;Defluviicoccus
g_test	inactive chimneys vs other sites	AY531570.1.1473	429.545	0	11	0	1.64522e-06	0.00138937	5.03657e-06	0.00112513	0.00151116	0.00107574	0.000417347	3.60607e-05	0.000188119	9.61731e-06	8.39925e-06	0	Bacteria;Proteobacteria;Epsilonproteobacteria;Campylobacterales;Helicobacteraceae;Sulfurovum;uncultured bacterium
g_test	inactive chimneys vs other sites	EU772607.1.1332	424.114	0	8	9.28489e-06	0	0	1.25914e-06	1.20206e-06	0	1.71569e-06	0	3.20539e-05	0	1.3739e-06	0.00219221	2.00212e-06	Bacteria;Proteobacteria;Gammaproteobacteria;Enterobacteriales;Enterobacteriaceae;Enterobacter;uncultured bacterium
g_test	inactive chimneys vs other sites	KF859635.1.1495	422.05	0	8	0.00114359	0.000144779	0.0023087	0.000124655	7.21238e-06	0	0	0	0	0	2.7478e-06	1.67985e-06	2.00212e-06	Bacteria;Proteobacteria;Gammaproteobacteria;Alteromonadales;Idiomarinaceae;Idiomarina
g_test	inactive chimneys vs other sites	New.ReferenceOTU439	421.855	0	6	0	0	0	0	2.04351e-05	0.000251564	3.08825e-05	0	0	0.0032087	0.000129147	0	6.00637e-06	Bacteria;Bacteroidetes;Flavobacteriia;Flavobacteriales;Flavobacteriaceae;Lutibacter;uncultured Bacteroidetes bacterium
g_test	inactive chimneys vs other sites	FJ628316.1.1523	421.087	0	7	1.54748e-06	0	0	0	0.000100973	0.000604109	1.20098e-05	0	2.00337e-06	0.00367259	0.000332484	0	0	Bacteria;Proteobacteria;Deltaproteobacteria;Desulfobacterales;Desulfobulbaceae;Desulfocapsa;uncultured delta proteobacterium
g_test	inactive chimneys vs other sites	New.CleanUp.ReferenceOTU536758	418.894	0	5	0	0	0	0	7.21238e-06	1.06295e-05	0	0	1.80303e-05	0.000949144	0.00114996	0	0	Bacteria;Proteobacteria;Gammaproteobacteria;Thiotrichales;Piscirickettsiaceae;Marine Methylotrophic Group 3;uncultured gamma proteobacterium
g_test	inactive chimneys vs other sites	HM799107.1.1449	416.191	0	7	0.00130607	0.00145602	0.000959619	0.00106146	5.52949e-05	3.54316e-06	0	0	0	0	0	0	0.000122129	Bacteria;Proteobacteria;Gammaproteobacteria;Oceanospirillales;Oceanospirillaceae;Pseudospirillum
g_test	inactive chimneys vs other sites	AF367495.1.1329	415.581	0	10	0	0	7.56951e-05	1.25914e-06	0.00100733	0.000836186	0.00337134	0.00741264	3.40573e-05	0.00555377	0.00692584	3.3597e-06	0	Bacteria;Proteobacteria;Epsilonproteobacteria;Campylobacterales;Helicobacteraceae;Sulfurimonas;uncultured epsilon proteobacterium
g_test	inactive chimneys vs other sites	New.CleanUp.ReferenceOTU375613	414.831	0	6	0	0	1.22089e-05	0	1.20206e-05	7.97211e-05	3.43139e-06	0	0	0.000436093	0.00161159	0	0	Bacteria;Bacteroidetes;Flavobacteriia;Flavobacteriales;Flavobacteriaceae;uncultured
g_test	inactive chimneys vs other sites	FR853012.1.1521	414.036	0	6	1.54748e-06	0	0	0	2.88495e-05	1.94874e-05	6.86277e-06	0	0.00540108	4.27542e-06	0	0	0	Bacteria;Spirochaetae;Spirochaetes;Spirochaetales;Spirochaetaceae;Spirochaeta;uncultured bacterium
g_test	inactive chimneys vs other sites	FR744471.1.1447	410.91	0	8	0	0	2.44178e-06	0	0.000105782	0.000853901	3.94609e-05	1.71748e-06	0	0.00029928	0.00269697	0	3.80403e-05	Bacteria;Bacteroidetes;Flavobacteriia;Flavobacteriales;Flavobacteriaceae;uncultured
g_test	inactive chimneys vs other sites	New.ReferenceOTU663	409.805	0	6	3.09496e-06	2.79687e-05	8.54623e-06	1.88871e-05	0.00313378	3.01169e-05	0	0	0	0	0	0	0	Bacteria;Proteobacteria;Gammaproteobacteria;Pseudomonadales;Moraxellaceae;Acinetobacter;uncultured bacterium
g_test	inactive chimneys vs other sites	New.ReferenceOTU2230	408.043	0	4	0	0	2.44178e-06	0	0	1.77158e-06	0	0	0	0.00110733	0.000927384	0	0	Bacteria;Bacteroidetes;Flavobacteriia;Flavobacteriales;Flavobacteriaceae
g_test	inactive chimneys vs other sites	FJ813578.1.1499	401.787	0	4	0	0	1.22089e-06	0	1.20206e-06	2.65737e-05	0	0	0	0	0	0	0.00244259	Bacteria;Proteobacteria;Gammaproteobacteria;Thiotrichales;Thiotrichaceae;uncultured;uncultured gamma proteobacterium
g_test	inactive chimneys vs other sites	AM997819.1.1521	398.977	0	7	0.00100277	0.00126024	0.000771602	0.000716452	1.9233e-05	1.24011e-05	0	0	0	0	0	0	4.00424e-06	Bacteria;Gemmatimonadetes;Gemmatimonadetes;BD2-11 terrestrial group
g_test	inactive chimneys vs other sites	GQ433923.1.1381	395.02	0	7	0	0	1.58716e-05	1.25914e-06	0.000251231	5.31474e-06	0.000106373	0	0	0	0.00129834	0.00123469	0	Bacteria;Bacteroidetes;VC2,1 Bac22;uncultured bacterium;uncultured bacterium;uncultured bacterium;uncultured bacterium
g_test	inactive chimneys vs other sites	New.ReferenceOTU1347	392.736	0	6	0	0	3.66267e-06	0	6.01032e-06	0	0.0024054	0.00119365	0.000947594	2.13771e-06	0	0	0	Bacteria;Caldiserica;Caldisericia;Caldisericales;Caldisericaceae;Caldisericum
g_test	inactive chimneys vs other sites	New.ReferenceOTU2142	391.813	0	6	0	0	0	0	0.00125976	8.68074e-05	0.00235736	0.00017003	4.00674e-06	0	0	1.67985e-06	0	Bacteria;Proteobacteria;Epsilonproteobacteria;Nautiliales;Nautiliaceae;Thioreductor
g_test	inactive chimneys vs other sites	New.ReferenceOTU2380	389.424	0	5	0	0	0	1.25914e-06	1.20206e-06	3.89748e-05	0	0	0	0.00243699	8.65558e-05	0	0	Bacteria;Proteobacteria;Gammaproteobacteria;Methylococcales;Marine Methylotrophic Group 2;uncultured bacterium;uncultured bacterium
g_test	inactive chimneys vs other sites	AB858629.1.1389	388.233	0	7	0	0	1.22089e-05	0	7.45279e-05	0.000317113	0.000183579	1.71748e-06	0	0.000686205	0.0019688	0	0	Bacteria;Spirochaetae;Spirochaetes;Spirochaetales;Spirochaetaceae;Spirochaeta;uncultured bacterium
g_test	inactive chimneys vs other sites	FR683876.1.1446	387.963	0	8	0.0010755	0.00121252	0.000622654	0.000776891	1.68289e-05	1.77158e-05	0	0	2.00337e-06	0	4.12171e-06	0	0	Bacteria;Proteobacteria;Alphaproteobacteria;SAR11 clade;Surface 1;uncultured alpha proteobacterium;uncultured alpha proteobacterium
g_test	inactive chimneys vs other sites	New.CleanUp.ReferenceOTU655135	387.848	0	4	0	0	0	0	1.80309e-05	1.77158e-05	0	0	0	8.55085e-06	0.00164456	0	0	Bacteria;Spirochaetae;Spirochaetes;Spirochaetales;Spirochaetaceae;Spirochaeta;uncultured bacterium
g_test	inactive chimneys vs other sites	AM990669.1.1375	386.641	0	9	0.000225932	0.000291203	0.00103043	8.56217e-05	0.00138237	0.000361402	5.14708e-06	0	0	2.13771e-06	4.12171e-06	0	0	Bacteria;Proteobacteria;Gammaproteobacteria;Alteromonadales;Alteromonadaceae;Marinobacter
g_test	inactive chimneys vs other sites	New.ReferenceOTU1302	385.93	0	7	0	0	4.02894e-05	3.77743e-06	0.00295347	1.59442e-05	1.71569e-06	6.86991e-06	6.01011e-06	0	0	0	0	Bacteria;Proteobacteria;Epsilonproteobacteria;Nautiliales;Nautiliaceae;Caminibacter
g_test	inactive chimneys vs other sites	New.ReferenceOTU2449	385.314	0	4	0	0	2.56387e-05	0	0.000589011	0.00352722	6.86277e-06	0	0	0	0	0	0	Bacteria;Proteobacteria;Gammaproteobacteria;Oceanospirillales;E12-CR02-full
g_test	inactive chimneys vs other sites	AY280425.1.1435	384.687	0	8	0	0	0	1.25914e-06	0.000528908	2.83453e-05	0.00142746	0.000498069	0.00223175	6.41313e-06	1.23651e-05	0	0	Bacteria;BHI80-139
g_test	inactive chimneys vs other sites	AY174894.1.1319	384.026	0	8	7.73741e-06	3.29043e-06	1.22089e-06	0	8.41444e-06	2.48021e-05	0	0	0	5.34428e-05	0.00117331	0	0.000642681	Bacteria;Proteobacteria;Alphaproteobacteria;Rickettsiales;LWSR-14;uncultured bacterium;uncultured bacterium
g_test	inactive chimneys vs other sites	New.ReferenceOTU83	383.193	0	6	0	0	3.66267e-06	0	6.01032e-06	1.77158e-06	0	0	0	2.13771e-05	0.00155114	0	6.00637e-06	Bacteria;Proteobacteria;Alphaproteobacteria;DB1-14;uncultured bacterium;uncultured bacterium;uncultured bacterium
g_test	inactive chimneys vs other sites	GU145458.1.1456	380.387	0	8	0.00125346	0.000720605	0.00097427	0.000522544	5.40928e-05	1.94874e-05	0	0	0	0	1.3739e-06	0	2.00212e-06	Bacteria;Planctomycetes;Phycisphaerae;Phycisphaerales;Phycisphaeraceae;JL-ETNP-F27;uncultured planctomycete
g_test	inactive chimneys vs other sites	FJ024305.1.1398	378.122	0	7	0.00089754	0.00095258	0.000946189	0.000657273	2.64454e-05	8.8579e-06	0	0	0	0	1.3739e-06	0	0	Bacteria;Acidobacteria;Acidobacteria;Subgroup 21;uncultured bacterium;uncultured bacterium;uncultured bacterium
g_test	inactive chimneys vs other sites	AJ431251.1.1522	377.814	0	6	0	0	0	0	0.000457986	3.366e-05	0.00303334	7.72865e-05	0.000536903	2.13771e-06	0	0	0	Bacteria;Firmicutes;Clostridia;Thermoanaerobacterales;Thermodesulfobiaceae;Coprothermobacter
g_test	inactive chimneys vs other sites	EU803156.1.1371	377.766	0	6	0.00104765	0.0010661	0.000722767	0.000659791	9.61651e-06	1.41726e-05	0	0	0	0	0	0	0	Bacteria;Proteobacteria;Alphaproteobacteria;SAR11 clade;Deep 1
g_test	inactive chimneys vs other sites	New.ReferenceOTU1243	377.15	0	5	1.54748e-06	1.64522e-06	1.22089e-06	0	0.00015146	0.00411715	0	0	0	0	0	0	0	Bacteria;Proteobacteria;Gammaproteobacteria;Oceanospirillales;E12-CR02-full
g_test	inactive chimneys vs other sites	JX878946.1.1475	376.226	0	6	0.000581853	0.00140172	0.00052132	0.000977095	1.44248e-05	7.08632e-06	0	0	0	0	0	0	0	Bacteria;Proteobacteria;Gammaproteobacteria;Oceanospirillales;SAR86 clade;uncultured bacterium;uncultured bacterium
g_test	inactive chimneys vs other sites	New.ReferenceOTU1023	373.781	0	5	0	0	0	0	8.41444e-06	0.000338372	3.43139e-06	0	0	0.00272131	0.000289893	0	0	Bacteria;Proteobacteria;Alphaproteobacteria;Rhizobiales;Rhodobiaceae;Rhodobium;uncultured bacterium
g_test	inactive chimneys vs other sites	AY345435.1.1520	372.706	0	8	1.70223e-05	0	0.00256143	2.51829e-06	0.000326961	0.00014527	3.43139e-06	0	0	0	1.3739e-06	1.67985e-06	0	Bacteria;Proteobacteria;Gammaproteobacteria;Alteromonadales;Alteromonadaceae;Alteromonas
g_test	inactive chimneys vs other sites	EF467494.1.1477	371.938	0	6	0	1.64522e-06	9.76712e-06	0	0.000965257	0.00291779	5.14708e-06	0	0	4.27542e-06	0	0	0	Bacteria;Proteobacteria;Epsilonproteobacteria;Campylobacterales;Campylobacteraceae;Arcobacter;uncultured bacterium
g_test	inactive chimneys vs other sites	EU803154.1.1453	369.141	0	6	0.00115287	0.00127669	4.15102e-05	0.00095443	8.89527e-05	2.48021e-05	0	0	0	0	0	0	0	Bacteria;Cyanobacteria;Cyanobacteria;SubsectionI;FamilyI;Prochlorococcus;uncultured bacterium
g_test	inactive chimneys vs other sites	JN833085.1.1377	368.679	0	6	0.00112811	0.00103813	0.000708116	0.000537654	2.16371e-05	2.30305e-05	0	0	0	0	0	0	0	Bacteria;Proteobacteria;Alphaproteobacteria;Rhodospirillales;Rhodospirillaceae;uncultured;uncultured alpha proteobacterium
g_test	inactive chimneys vs other sites	JN662115.1.1362	368.369	0	7	0	0	2.07551e-05	0	0.000269262	0.000935394	1.37255e-05	0	0	0.000145364	0.00288519	0	4.00424e-06	Bacteria;Proteobacteria;Epsilonproteobacteria;Campylobacterales;Helicobacteraceae;Sulfurovum;uncultured bacterium
g_test	inactive chimneys vs other sites	New.CleanUp.ReferenceOTU292728	367.976	0	5	0	0	4.88356e-06	0	0	1.06295e-05	0	0	0	0.000173155	0.00140001	0	2.00212e-06	Bacteria;Bacteroidetes;Sphingobacteriia;Sphingobacteriales;Saprospiraceae;Lewinella;uncultured bacterium
g_test	inactive chimneys vs other sites	AB694373.1.1456	367.403	0	4	4.64245e-06	0	6.10445e-06	0	0	0	0	0	0	0	0	1.67985e-06	0.00218632	Bacteria;Proteobacteria;Alphaproteobacteria;SB1-18;uncultured bacterium;uncultured bacterium;uncultured bacterium
g_test	inactive chimneys vs other sites	GU061084.1.1385	364.867	0	7	0	0	1.22089e-06	0	0.000135833	0.00088579	1.88726e-05	1.37398e-05	0	0.000128263	0.00266812	0	0	Bacteria;Proteobacteria;Alphaproteobacteria;Rhodobacterales;Rhodobacteraceae
g_test	inactive chimneys vs other sites	New.ReferenceOTU2220	362.363	0	5	0	0	2.44178e-06	3.77743e-06	0.00277316	7.79495e-05	0	0	2.00337e-06	0	0	0	0	Bacteria;Aquificae;Aquificae;Aquificales;Desulfurobacteriaceae
g_test	inactive chimneys vs other sites	New.ReferenceOTU1732	362.055	0	5	0	0	0	0	2.64454e-05	5.31474e-06	0.000440933	0.0035569	4.00674e-06	0	0	0	0	Bacteria;Proteobacteria;Epsilonproteobacteria;Campylobacterales;Helicobacteraceae;Sulfurimonas;uncultured bacterium
g_test	inactive chimneys vs other sites	GQ337220.1.1506	361.285	0	6	0.00041163	0.0017719	0.000335745	0.000892732	1.56268e-05	1.77158e-05	0	0	0	0	0	0	0	Bacteria;Proteobacteria;Gammaproteobacteria;E01-9C-26 marine group;uncultured bacterium;uncultured bacterium;uncultured bacterium
g_test	inactive chimneys vs other sites	HQ673997.1.1445	360.877	0	8	0.000714937	0.00130795	0.000510332	0.000868809	1.32227e-05	2.48021e-05	0	0	0	0	0	1.67985e-06	2.00212e-06	Bacteria;Proteobacteria;Alphaproteobacteria;SAR11 clade;Deep 1
g_test	inactive chimneys vs other sites	FJ905650.1.1392	360.247	0	7	0	0	1.22089e-06	0	6.01032e-06	0.00010098	0	0	0	0.000164604	0.00131345	1.67985e-06	0.000344365	Bacteria;Planctomycetes;Planctomycetacia;Planctomycetales;Planctomycetaceae;Planctomyces;uncultured bacterium
g_test	inactive chimneys vs other sites	New.ReferenceOTU1380	358.432	0	7	0	0	1.22089e-06	0	0.000472411	5.4919e-05	0.00255123	0.000741951	2.20371e-05	2.13771e-06	0	0	0	Bacteria;Proteobacteria;Epsilonproteobacteria;Campylobacterales;Helicobacteraceae;Sulfurovum
g_test	inactive chimneys vs other sites	New.ReferenceOTU23	358.112	0	8	0.00120394	0.000945999	0.000909563	0.000313527	1.9233e-05	1.59442e-05	0	0	0	0	1.3739e-06	1.67985e-06	0	Bacteria;Actinobacteria;Acidimicrobiia;Acidimicrobiales;Sva0996 marine group;uncultured actinobacterium;uncultured actinobacterium
g_test	inactive chimneys vs other sites	New.ReferenceOTU1311	358.05	0	5	0	0	1.46507e-05	0	0.00245101	3.54316e-06	0.000447796	2.57622e-05	0	0	0	0	0	Bacteria;Proteobacteria;Epsilonproteobacteria;Nautiliales;Nautiliaceae;Caminibacter;uncultured bacterium
g_test	inactive chimneys vs other sites	EU778480.1.1400	358.026	0	5	7.73741e-06	0	2.44178e-06	0	4.80825e-06	0	0	0	1.6027e-05	0	0	0.00184448	0	Bacteria;Proteobacteria;Gammaproteobacteria;Enterobacteriales;Enterobacteriaceae;Enterobacter;uncultured bacterium
g_test	inactive chimneys vs other sites	FJ205286.1.1488	357.681	0	6	0	0	4.88356e-06	0	0	5.31474e-06	0	3.43496e-06	0	0	1.3739e-06	1.67985e-06	0.00213426	Bacteria;Proteobacteria;Gammaproteobacteria;Thiotrichales;Thiotrichaceae;uncultured
g_test	inactive chimneys vs other sites	New.ReferenceOTU1368	357.623	0	4	0	0	0	0	0	7.08632e-06	0	0	0	0	0.000365458	1.67985e-06	0.00156966	Bacteria;Planctomycetes;Planctomycetacia;Planctomycetales;Planctomycetaceae;Rhodopirellula
g_test	inactive chimneys vs other sites	KF268731.1.1377	355.531	0	4	1.23799e-05	0	0	0	0	1.77158e-05	0	0	0	0	0.000798237	0	0.00101508	Bacteria;Actinobacteria;Acidimicrobiia;Acidimicrobiales;Acidimicrobiaceae;uncultured;uncultured bacterium
g_test	inactive chimneys vs other sites	EU803121.1.1436	355.194	0	7	0.00121168	0.00127998	8.7904e-05	0.000848662	3.24557e-05	3.366e-05	0	0	0	0	0	3.3597e-06	0	Bacteria;Proteobacteria;Alphaproteobacteria;SAR11 clade;Surface 1
g_test	inactive chimneys vs other sites	New.CleanUp.ReferenceOTU61998	354.398	0	4	0	0	2.44178e-06	0	0	0	0	0	0	0	2.7478e-06	5.03955e-06	0.00206018	Bacteria;Proteobacteria;Gammaproteobacteria;Chromatiales;Chromatiaceae;Nitrosococcus;uncultured bacterium
g_test	inactive chimneys vs other sites	HQ674390.1.1461	354.2	0	6	0.00104919	0.00108913	0.000642188	0.000520026	2.16371e-05	1.24011e-05	0	0	0	0	0	0	0	Bacteria;Proteobacteria;Alphaproteobacteria;Rhodospirillales;Rhodospirillaceae;uncultured;uncultured bacterium
g_test	inactive chimneys vs other sites	JQ195940.1.1350	354.153	0	7	0	0	1.22089e-06	0	4.32743e-05	0.000164757	6.34806e-05	5.15243e-06	0	0.000735373	0.00141787	0	0	Bacteria;Bacteroidetes;Flavobacteriia;Flavobacteriales;Cryomorphaceae;Fluviicola;uncultured bacterium
g_test	inactive chimneys vs other sites	FJ746320.1.1495	353.851	0	5	0	0	1.22089e-06	0	0	1.59442e-05	0	0	0	7.69576e-05	1.51129e-05	0	0.00202815	Bacteria;Verrucomicrobia;Verrucomicrobiae;Verrucomicrobiales;DEV007;uncultured bacterium;uncultured bacterium
g_test	inactive chimneys vs other sites	JQ753201.1.1486	352.818	0	4	0	0	1.22089e-06	0	0	1.59442e-05	0	0	0	0.000162466	0.0013478	0	0	Bacteria;Bacteroidetes;Sphingobacteriia;Sphingobacteriales;Saprospiraceae;Lewinella
g_test	inactive chimneys vs other sites	New.ReferenceOTU1204	350.987	0	8	9.28489e-06	1.64522e-06	2.80805e-05	7.55486e-06	4.80825e-06	1.59442e-05	0	0	0	0	0.00013739	0	0.00210023	Bacteria;Proteobacteria;Gammaproteobacteria;Xanthomonadales;JTB255 marine benthic group;uncultured bacterium;uncultured bacterium
g_test	inactive chimneys vs other sites	New.CleanUp.ReferenceOTU957308	350.776	0	6	0	0	1.22089e-06	0	2.28392e-05	0.000265737	1.71569e-06	0	0	0.00219115	0.000469874	0	0	Bacteria;Proteobacteria;Gammaproteobacteria;Order Incertae Sedis;Family Incertae Sedis;Marinicella;uncultured bacterium
g_test	inactive chimneys vs other sites	New.ReferenceOTU542	348.241	0	5	0	0	0	0	2.40413e-06	2.65737e-05	0	0	0	0.000192394	0.00133268	0	8.00849e-06	Bacteria;Verrucomicrobia;Verrucomicrobiae;Verrucomicrobiales;DEV007;uncultured bacterium;uncultured bacterium
g_test	inactive chimneys vs other sites	GQ337099.1.1474	345.574	0	6	0.000471982	0.00160573	0.000410219	0.000769336	1.44248e-05	1.41726e-05	0	0	0	0	0	0	0	Bacteria;Proteobacteria;Alphaproteobacteria;Rhodospirillales;Rhodospirillaceae;uncultured;uncultured bacterium
g_test	inactive chimneys vs other sites	AM997309.1.1457	344.958	0	6	0.000957891	0.000779832	0.000814333	0.000581724	2.28392e-05	5.31474e-06	0	0	0	0	0	0	0	Bacteria;Chloroflexi;SAR202 clade
g_test	inactive chimneys vs other sites	HM798804.1.1396	344.903	0	8	0.00103372	0.000898288	0.000753289	0.000552764	8.41444e-06	1.59442e-05	0	0	0	0	1.3739e-06	1.67985e-06	0	Bacteria;Proteobacteria;Alphaproteobacteria;SAR11 clade;Deep 1;uncultured bacterium;uncultured bacterium
g_test	inactive chimneys vs other sites	New.CleanUp.ReferenceOTU856850	344.589	0	6	0	0	0.000119647	0	0.00241495	2.48021e-05	8.23532e-05	0.000164878	0	0	0	1.67985e-06	0	Bacteria;Proteobacteria;Epsilonproteobacteria;Nautiliales;Nautiliaceae;Thioreductor
g_test	inactive chimneys vs other sites	HQ673280.1.1519	342.339	0	6	0.000536976	0.0016337	0.000434637	0.000652236	8.41444e-06	1.06295e-05	0	0	0	0	0	0	0	Bacteria;Planctomycetes;Pla3 lineage;uncultured bacterium;uncultured bacterium;uncultured bacterium;uncultured bacterium
g_test	inactive chimneys vs other sites	New.ReferenceOTU1601	342.002	0	4	1.54748e-06	0	0	0	0	0	0	0	0.00485416	2.35148e-05	2.7478e-06	0	0	Bacteria;Aquificae;Aquificae;Aquificales;Desulfurobacteriaceae;Desulfurobacterium
g_test	inactive chimneys vs other sites	New.ReferenceOTU1761	339.875	0	5	0	0	3.66267e-06	1.25914e-06	0.00263733	7.08632e-06	0	0	1.80303e-05	0	0	0	0	Bacteria;Aquificae;Aquificae;Aquificales;Desulfurobacteriaceae
g_test	inactive chimneys vs other sites	HM778159.1.1531	339.522	0	4	0	1.31617e-05	3.66267e-06	2.14054e-05	0	0	0	0	0	0	0	0.0017924	0	Bacteria;Firmicutes;Bacilli;Lactobacillales;Streptococcaceae;Streptococcus;uncultured bacterium
g_test	inactive chimneys vs other sites	New.ReferenceOTU234	338.758	0	7	0	0	0	0	1.9233e-05	4.60611e-05	3.43139e-06	1.71748e-06	0.0049944	4.91674e-05	2.7478e-06	0	0	Bacteria;Proteobacteria;Epsilonproteobacteria;Campylobacterales;Helicobacteraceae;Sulfurovum;uncultured bacterium
g_test	inactive chimneys vs other sites	JN873951.1.1482	337.616	0	8	0	0	7.44743e-05	0	0.00174299	3.01169e-05	4.28923e-05	1.71748e-06	0.0021376	5.55805e-05	1.09912e-05	0	0	Bacteria;Proteobacteria;Epsilonproteobacteria;Campylobacterales;Helicobacteraceae;Sulfurovum;uncultured bacterium
g_test	inactive chimneys vs other sites	HQ673034.1.1523	337.564	0	6	0.000699462	0.00119443	0.000643409	0.000586761	2.88495e-05	1.77158e-06	0	0	0	0	0	0	0	Bacteria;Gemmatimonadetes;Gemmatimonadetes;BD2-11 terrestrial group
g_test	inactive chimneys vs other sites	GQ433956.1.1444	335.393	0	7	0	0	0	0	3.60619e-05	1.77158e-06	0.00524144	3.43496e-06	2.00337e-06	8.55085e-06	0.000120903	0	0	Bacteria;Bacteroidetes;VC2,1 Bac22;uncultured bacterium;uncultured bacterium;uncultured bacterium;uncultured bacterium
g_test	inactive chimneys vs other sites	JN018932.1.1344	334.592	0	7	0.000544714	0.00128327	0.000444404	0.000841107	2.52433e-05	2.65737e-05	0	0	0	0	0	1.67985e-06	0	Bacteria;Proteobacteria;Alphaproteobacteria;SAR11 clade;Deep 1;uncultured bacterium;uncultured bacterium
g_test	inactive chimneys vs other sites	New.ReferenceOTU1970	334.329	0	6	0	0	7.81369e-05	0	0.00219857	3.54316e-05	6.6912e-05	0.000341778	4.80809e-05	0	0	0	0	Unassigned
g_test	inactive chimneys vs other sites	AY268936.1.1506	332.923	0	8	0	0	2.68596e-05	0	0.000705611	4.96042e-05	1.71569e-06	9.44613e-05	0.00303511	2.13771e-06	0	1.67985e-06	0	Bacteria;Aquificae;Aquificae;Aquificales;Desulfurobacteriaceae
g_test	inactive chimneys vs other sites	New.ReferenceOTU2633	332.439	0	7	0.000504479	0.00132769	0.000697128	0.000560319	2.64454e-05	2.65737e-05	0	0	0	0	0	1.67985e-06	0	Bacteria;Candidate division OD1
g_test	inactive chimneys vs other sites	New.ReferenceOTU2322	329.21	0	5	0	0	1.22089e-06	0	0	0	0	0	0	2.13771e-06	9.47992e-05	1.67985e-06	0.00177388	Bacteria;Proteobacteria;Gammaproteobacteria;Chromatiales;Ectothiorhodospiraceae;Acidiferrobacter;uncultured bacterium
g_test	inactive chimneys vs other sites	New.ReferenceOTU1562	328.445	0	4	0	0	0	0	0.00033778	7.08632e-06	0	0	0.00382844	6.41313e-06	0	0	0	Bacteria;Firmicutes;Clostridia;Thermoanaerobacterales;Thermodesulfobiaceae;Coprothermobacter
g_test	inactive chimneys vs other sites	New.ReferenceOTU102	326.782	0	5	1.23799e-05	1.64522e-06	3.66267e-06	0	3.36578e-05	0.00369552	0	0	0	0	0	0	0	Unassigned
g_test	inactive chimneys vs other sites	JQ712391.1.1392	325.539	0	9	7.73741e-06	0	0.000335745	7.55486e-06	0.00206514	0.000924765	6.6912e-05	2.06097e-05	0	7.48199e-05	4.12171e-06	0	0	Bacteria;Proteobacteria;Epsilonproteobacteria;Campylobacterales;Campylobacteraceae;Arcobacter;uncultured epsilon proteobacterium
g_test	inactive chimneys vs other sites	New.ReferenceOTU1096	325.255	0	6	0	1.64522e-06	1.22089e-06	0	3.12536e-05	0.000483641	0	0	0	0.00183416	0.000840828	0	0	Bacteria;Proteobacteria;Epsilonproteobacteria;Campylobacterales;Helicobacteraceae;Sulfurimonas
g_test	inactive chimneys vs other sites	AF526984.1.1035	324.317	0	6	0.000598876	0.00121581	0.000655618	0.000523803	2.88495e-05	1.24011e-05	0	0	0	0	0	0	0	Archaea;Thaumarchaeota;Marine Group I;uncultured marine archaeon;uncultured marine archaeon;uncultured marine archaeon;uncultured marine archaeon
g_test	inactive chimneys vs other sites	AB095142.1.1060	322.777	0	6	0.000533881	0.00163205	0.000404114	0.000518767	1.32227e-05	1.59442e-05	0	0	0	0	0	0	0	Archaea;Euryarchaeota;Thermoplasmata;Thermoplasmatales;Marine Group II
g_test	inactive chimneys vs other sites	HQ674464.1.1436	320.004	0	6	0.000790763	0.000903223	0.000629979	0.000603129	1.20206e-05	3.01169e-05	0	0	0	0	0	0	0	Bacteria;Proteobacteria;Alphaproteobacteria;SAR11 clade;uncultured bacterium;uncultured bacterium;uncultured bacterium
g_test	inactive chimneys vs other sites	JQ712419.1.1381	317.848	0	7	0	1.64522e-06	4.88356e-06	1.25914e-06	0.00190407	0.000800754	3.43139e-05	1.03049e-05	0	0	0	0	0	Bacteria;Proteobacteria;Epsilonproteobacteria;Campylobacterales;Campylobacteraceae;Arcobacter;uncultured epsilon proteobacterium
g_test	inactive chimneys vs other sites	GQ377760.1.1201	316.462	0	6	0.000300212	1.48069e-05	0.000612886	0.00121381	0.000447168	3.18884e-05	0	0	0	0	0	0	0	Bacteria;Proteobacteria;Gammaproteobacteria;Alteromonadales;Alteromonadaceae;Alteromonas
g_test	inactive chimneys vs other sites	HQ721447.1.1441	315.983	0	6	0.000787668	0.000779832	0.000877819	0.000450773	2.28392e-05	0	0	0	0	0	0	1.67985e-06	0	Bacteria;Chloroflexi;SAR202 clade
g_test	inactive chimneys vs other sites	JN662174.1.1366	315.603	0	7	0	0	1.22089e-06	0	5.16887e-05	0.000157671	6.17649e-05	0	0.00447553	2.9928e-05	1.78607e-05	0	0	Bacteria;Proteobacteria;Epsilonproteobacteria;Campylobacterales;Helicobacteraceae;Sulfurovum;uncultured bacterium
g_test	inactive chimneys vs other sites	AJ507320.1.1514	315.229	0	6	0	0	1.46507e-05	0	0.00201105	2.1259e-05	5.14708e-06	5.15243e-06	0.000697173	0	0	0	0	Bacteria;Aquificae;Aquificae;Aquificales;Desulfurobacteriaceae
g_test	inactive chimneys vs other sites	HM798821.1.1474	314.921	0	6	0.000834093	0.000890062	0.000766719	0.00039663	2.04351e-05	1.59442e-05	0	0	0	0	0	0	0	Bacteria;Gemmatimonadetes;Gemmatimonadetes;BD2-11 terrestrial group
g_test	inactive chimneys vs other sites	New.ReferenceOTU1374	313.749	0	7	0	0	1.22089e-06	0	7.21238e-06	5.13758e-05	0	0	0	1.06886e-05	0.00111149	0.000100791	0.000272289	Bacteria;Bacteroidetes;Flavobacteriia;Flavobacteriales;Flavobacteriaceae;Maritimimonas
g_test	inactive chimneys vs other sites	New.CleanUp.ReferenceOTU931732	312.611	0	6	0	0	0	1.25914e-06	0.00101214	7.08632e-06	0.00202109	1.37398e-05	2.00337e-06	0	0	0	0	Bacteria;Proteobacteria;Epsilonproteobacteria;Campylobacterales;Helicobacteraceae;Sulfurovum
g_test	inactive chimneys vs other sites	New.ReferenceOTU1744	311.841	0	7	2.01173e-05	0	0.000360162	1.88871e-05	0.00162038	0.000630682	1.71569e-06	1.71748e-06	0	0	0	0	0	Bacteria;Proteobacteria;Gammaproteobacteria;Alteromonadales;Alteromonadaceae;Alteromonas
g_test	inactive chimneys vs other sites	New.ReferenceOTU316	311.547	0	4	0	0	1.22089e-06	0	0	0	0	0	0	0	1.3739e-06	1.67985e-06	0.00180992	Bacteria;Proteobacteria;Gammaproteobacteria;Chromatiales;Ectothiorhodospiraceae;Acidiferrobacter;uncultured bacterium
g_test	inactive chimneys vs other sites	AF068783.1.1439	311.215	0	7	0	0	4.88356e-06	0	0.00161076	8.8579e-05	0.000955641	9.44613e-05	8.41415e-05	0	0	1.67985e-06	0	Bacteria;Proteobacteria;Epsilonproteobacteria;Campylobacterales;Helicobacteraceae;Sulfurovum
g_test	inactive chimneys vs other sites	AB842279.1.1433	309.586	0	12	0	1.64522e-06	2.44178e-06	1.25914e-06	0.000179107	0.00085213	2.05883e-05	1.88923e-05	9.2155e-05	0.00366617	0.000215703	5.03955e-06	2.00212e-06	Bacteria;Proteobacteria;Epsilonproteobacteria;Campylobacterales;Helicobacteraceae;Sulfurovum;uncultured Sulfurovum sp,
g_test	inactive chimneys vs other sites	New.ReferenceOTU2153	306.228	0	7	1.54748e-06	0	4.88356e-06	0	4.32743e-05	0.000356088	1.71569e-06	0	0	0.000510913	0.00149893	0	0	Bacteria;Bacteroidetes;Sphingobacteriia;Sphingobacteriales;Saprospiraceae;Lewinella
g_test	inactive chimneys vs other sites	New.ReferenceOTU2558	305.142	0	4	0	0	6.10445e-06	0	1.20206e-06	0	0	0	0	0	2.7478e-06	0	0.00180992	Bacteria;Proteobacteria;Alphaproteobacteria;Rhodospirillales;Rhodospirillaceae;uncultured
g_test	inactive chimneys vs other sites	New.CleanUp.ReferenceOTU558660	302.842	0	8	0.000540071	0.0012553	0.000474926	0.000642163	1.68289e-05	7.08632e-06	0	0	0	0	1.3739e-06	3.3597e-06	0	Bacteria;Proteobacteria;Gammaproteobacteria;E01-9C-26 marine group;uncultured bacterium;uncultured bacterium;uncultured bacterium
g_test	inactive chimneys vs other sites	New.ReferenceOTU1621	302.753	0	4	0	0	0	0	0.00019233	7.08632e-06	0.00261815	0.000480894	0	0	0	0	0	Bacteria;Proteobacteria;Epsilonproteobacteria;Campylobacterales;Helicobacteraceae;Sulfurovum;uncultured bacterium
g_test	inactive chimneys vs other sites	AY280407.1.1426	301.908	0	6	0	0	5.12774e-05	0	0.0023284	0.000228534	1.71569e-06	0	0	1.4964e-05	2.7478e-06	0	0	Bacteria;Proteobacteria;Epsilonproteobacteria;Campylobacterales;Helicobacteraceae;Sulfurimonas
g_test	inactive chimneys vs other sites	AM083971.1.1460	301.792	0	7	4.79719e-05	2.79687e-05	4.76147e-05	1.63689e-05	0.000958044	0.00202137	0	0	0	8.55085e-06	0	0	0	Bacteria;Proteobacteria;Gammaproteobacteria;Oceanospirillales;SUP05 cluster
g_test	inactive chimneys vs other sites	New.ReferenceOTU1933	301.327	0	6	0	0	3.54058e-05	0	0	0.00081847	0	0.00189781	0.000993671	6.41313e-06	6.86951e-06	0	0	Bacteria;Aquificae;Aquificae;Aquificales;Desulfurobacteriaceae;Desulfurobacterium
g_test	inactive chimneys vs other sites	New.ReferenceOTU2358	300.247	0	5	1.54748e-06	0	0	0	0	5.31474e-06	0	0	0	9.83347e-05	0.00114996	0	4.00424e-06	Bacteria;Bacteroidetes;Flavobacteriia;Flavobacteriales;Flavobacteriaceae;Ulvibacter;uncultured bacterium
g_test	inactive chimneys vs other sites	HQ672984.1.1473	297.99	0	7	0.000691725	0.000855512	0.000579922	0.000627053	1.08186e-05	2.30305e-05	0	0	0	0	0	0	2.00212e-06	Bacteria;Proteobacteria;Alphaproteobacteria;SAR11 clade;Deep 1;uncultured bacterium;uncultured bacterium
g_test	inactive chimneys vs other sites	AB476171.1.1456	297.509	0	7	0	6.58086e-06	1.46507e-05	0	0.000108186	0.00403212	0	0	0	2.35148e-05	0.00305418	0.00175208	0	Bacteria;Proteobacteria;Gammaproteobacteria;Thiotrichales;Thiotrichaceae;uncultured
g_test	inactive chimneys vs other sites	EF092224.1.1444	297.413	0	6	0	0	2.31969e-05	0	2.40413e-06	1.59442e-05	0	0	0	0.00121422	0.000520709	0	2.00212e-06	Bacteria;Proteobacteria;Deltaproteobacteria;Myxococcales;Nannocystaceae;uncultured
g_test	inactive chimneys vs other sites	HQ588379.1.1373	295.919	0	9	0	0	0.000877819	3.77743e-06	0.000403893	0.000294082	7.37748e-05	5.15243e-06	0.00381241	0.000237286	4.94605e-05	0	0	Bacteria;Proteobacteria;Epsilonproteobacteria;Campylobacterales;Helicobacteraceae;Sulfurovum;uncultured bacterium
g_test	inactive chimneys vs other sites	New.ReferenceOTU1047	294.237	0	8	0	0	1.83133e-05	2.51829e-06	0.0015158	5.31474e-06	0.000617649	0.000321168	0.000560944	2.77902e-05	0	0	0	Bacteria;Aquificae;Aquificae;Aquificales;Desulfurobacteriaceae;Thermovibrio
g_test	inactive chimneys vs other sites	KC682705.1.1490	293.882	0	5	0	0	0	0	1.20206e-06	2.48021e-05	0	0	0	1.4964e-05	0.00121178	0	2.20233e-05	Bacteria;Planctomycetes;Planctomycetacia;Planctomycetales;Planctomycetaceae;Planctomyces;uncultured bacterium
g_test	inactive chimneys vs other sites	JQ199269.1.1308	293.665	0	7	0.00060816	0.00103155	0.000407777	0.000684974	4.80825e-06	1.41726e-05	0	0	2.00337e-06	0	0	0	0	Bacteria;Proteobacteria;Alphaproteobacteria;Rhodospirillales;Rhodospirillaceae;AEGEAN-169 marine group;uncultured alpha proteobacterium
g_test	inactive chimneys vs other sites	JQ287110.1.1470	293.314	0	11	1.54748e-06	0	0.000258829	1.25914e-06	0.00209039	0.00085213	0.00217378	0.000877631	1.6027e-05	0.000701169	1.3739e-05	1.67985e-06	0	Bacteria;Proteobacteria;Epsilonproteobacteria;Campylobacterales;Helicobacteraceae;Sulfurovum;uncultured bacterium
g_test	inactive chimneys vs other sites	New.ReferenceOTU1127	293.002	0	9	0	0	1.70925e-05	1.25914e-06	0.00164442	0.000256879	0.000715444	3.43496e-06	2.00337e-06	2.13771e-06	1.3739e-06	0	0	Bacteria;Proteobacteria;Epsilonproteobacteria;Campylobacterales;Helicobacteraceae;Sulfurimonas;uncultured bacterium
g_test	inactive chimneys vs other sites	New.ReferenceOTU2331	289.044	0	6	0	0	8.54623e-06	0	0.00022118	2.48021e-05	1.71569e-06	1.20223e-05	0.00334162	0	0	0	0	Unassigned
g_test	inactive chimneys vs other sites	KC682623.1.1471	288.785	0	7	0	0	0	0	4.80825e-06	3.54316e-06	0	1.71748e-06	4.00674e-06	0.0016781	0.000108538	6.7194e-06	0	Bacteria;Bacteroidetes;Flavobacteriia;Flavobacteriales;Flavobacteriaceae;Lutibacter;uncultured bacterium
g_test	inactive chimneys vs other sites	EF597699.1.1457	287.995	0	7	0.000615898	0.000975613	0.000577481	0.000522544	1.80309e-05	5.31474e-06	0	0	0	0	1.3739e-06	0	0	Bacteria;Acidobacteria;Acidobacteria;Subgroup 6;uncultured Acidobacteria bacterium;uncultured Acidobacteria bacterium;uncultured Acidobacteria bacterium
g_test	inactive chimneys vs other sites	New.CleanUp.ReferenceOTU484698	287.503	0	7	0	0	0	0	0.000126217	3.18884e-05	0.00197476	0.00229627	2.00337e-06	0.000156053	0	1.67985e-06	0	Bacteria;Proteobacteria;Epsilonproteobacteria;Campylobacterales;Helicobacteraceae;Sulfurimonas;uncultured bacterium
g_test	inactive chimneys vs other sites	New.ReferenceOTU421	287.35	0	4	4.64245e-06	0	3.66267e-05	0	0.000324557	0.00277607	0	0	0	0	0	0	0	Bacteria;Proteobacteria;Gammaproteobacteria;Alteromonadales;Alteromonadaceae;Marinobacter
g_test	inactive chimneys vs other sites	DQ925883.1.1422	285.208	0	4	0	0	0	0	1.56268e-05	2.30305e-05	1.71569e-06	0	0	0	0.00124338	0	0	Bacteria;Chlorobi;Ignavibacteria;Ignavibacteriales;IheB3-7;uncultured bacterium;uncultured bacterium
g_test	inactive chimneys vs other sites	JN874115.1.1488	284.885	0	6	1.54748e-06	0	5.61609e-05	0	0.00173458	5.13758e-05	0.000573041	1.71748e-06	0	0	0	0	0	Bacteria;Bacteroidetes;Flavobacteriia;Flavobacteriales;R103-B20;uncultured bacterium;uncultured bacterium
g_test	inactive chimneys vs other sites	New.ReferenceOTU319	282.228	0	4	0	0	0	0	0	2.65737e-05	0	0	0	0	1.3739e-06	1.67985e-06	0.00172983	Bacteria;Verrucomicrobia;Verrucomicrobiae;Verrucomicrobiales;DEV007;uncultured bacterium;uncultured bacterium
g_test	inactive chimneys vs other sites	New.ReferenceOTU2205	279.148	0	5	0	0	0	0	0	1.59442e-05	0	0	0	0.000123987	0.00106615	6.7194e-06	4.00424e-06	Bacteria;Proteobacteria;Gammaproteobacteria;Order Incertae Sedis;Family Incertae Sedis;Marinicella;uncultured bacterium
g_test	inactive chimneys vs other sites	JX402651.1.1467	277.541	0	4	0	0	7.32534e-06	0	0	0	0	0	0	0	9.61731e-06	1.1759e-05	0.00162572	Bacteria;Proteobacteria;Alphaproteobacteria;Rhodospirillales;Rhodospirillaceae;uncultured;uncultured bacterium
g_test	inactive chimneys vs other sites	EU644237.1.1408	277.295	0	6	1.54748e-06	0	2.44178e-06	0	3.00516e-05	1.24011e-05	0	0	0	0	0.000923262	0	0.000456484	Bacteria;Candidate division OD1;uncultured bacterium;uncultured bacterium;uncultured bacterium;uncultured bacterium;uncultured bacterium
g_test	inactive chimneys vs other sites	New.ReferenceOTU1165	276.502	0	10	7.73741e-06	4.93565e-06	0.000125752	0	0.00133189	0.00762134	0.000700003	0.000125376	4.00674e-05	0.00159687	3.98432e-05	0	0	Bacteria;Proteobacteria;Epsilonproteobacteria;Campylobacterales;Helicobacteraceae;Sulfurovum;uncultured bacterium
g_test	inactive chimneys vs other sites	JF443777.1.1350	275.693	0	4	0	0	1.34298e-05	0	0	2.83453e-05	0	0	0	0	0.00112935	0	0.000110117	Bacteria;Planctomycetes;Planctomycetacia;Planctomycetales;Planctomycetaceae;Rhodopirellula;uncultured organism
g_test	inactive chimneys vs other sites	JQ712413.1.1383	273.935	0	11	6.49943e-05	3.61947e-05	0.000251503	2.77011e-05	0.001166	0.0011285	0.000679414	0.00256591	2.00337e-06	0.000540841	4.67127e-05	0	0	Bacteria;Proteobacteria;Epsilonproteobacteria;Campylobacterales;Helicobacteraceae;Sulfurimonas;uncultured epsilon proteobacterium
g_test	inactive chimneys vs other sites	HQ673345.1.1528	273.333	0	6	0.00067625	0.000597213	0.000533529	0.000654754	1.08186e-05	2.30305e-05	0	0	0	0	0	0	0	Bacteria;Deferribacteres;Deferribacteres;Deferribacterales;SAR406 clade(Marine group A);uncultured bacterium;uncultured bacterium
g_test	inactive chimneys vs other sites	EU491866.1.1445	272.274	0	8	4.64245e-06	8.22608e-06	8.54623e-06	2.01463e-05	0	1.59442e-05	0	0	0	0	0.000214329	5.03955e-06	0.00147556	Bacteria;Bacteroidetes;Flavobacteriia;Flavobacteriales;Flavobacteriaceae;uncultured;uncultured bacterium
g_test	inactive chimneys vs other sites	EU050911.1.1396	271.96	0	4	0	0	1.22089e-06	0	0	1.06295e-05	0	0	0	0	0	1.67985e-06	0.00162572	Bacteria;Bacteroidetes;Cytophagia;Cytophagales;Flammeovirgaceae;Ekhidna
g_test	inactive chimneys vs other sites	HG799952.1.1818	271.33	0	7	0.000266167	0.000761735	1.22089e-05	0.00133595	3.7264e-05	0	5.14708e-06	0	5.20876e-05	0	0	0	0	Bacteria;Firmicutes;Bacilli;Bacillales;Staphylococcaceae;Staphylococcus
g_test	inactive chimneys vs other sites	HQ674100.1.1520	271.176	0	6	0.000389966	0.00118126	0.000227085	0.000758004	6.01032e-06	3.54316e-06	0	0	0	0	0	0	0	Bacteria;Deferribacteres;Deferribacteres;Deferribacterales;SAR406 clade(Marine group A);uncultured bacterium;uncultured bacterium
g_test	inactive chimneys vs other sites	New.ReferenceOTU2197	271.022	0	5	0	0	0.00037115	1.25914e-06	0.00169371	7.08632e-06	0	7.9004e-05	0	0	0	0	0	Bacteria;Proteobacteria;Epsilonproteobacteria;Nautiliales;Nautiliaceae;Nitratiruptor;uncultured bacterium
g_test	inactive chimneys vs other sites	New.ReferenceOTU1066	271.022	0	5	0	0	0.000181913	0	0.000742875	3.01169e-05	0	0.00112667	0.000649092	0	0	0	0	Bacteria;Proteobacteria;Epsilonproteobacteria;Nautiliales;Nautiliaceae;uncultured;uncultured bacterium
g_test	inactive chimneys vs other sites	New.ReferenceOTU1987	270.999	0	5	0	0	0	0	2.40413e-06	0.000214361	8.57846e-06	0	0	0.000301417	0.00124888	0	0	Bacteria;Proteobacteria;Gammaproteobacteria;Order Incertae Sedis;Family Incertae Sedis;Marinicella;uncultured bacterium
g_test	inactive chimneys vs other sites	New.ReferenceOTU2441	270.714	0	4	0	0	0	0	4.92846e-05	2.1259e-05	1.71569e-06	0	0.00342176	0	0	0	0	Unassigned
g_test	inactive chimneys vs other sites	AM997339.1.1472	269.282	0	7	0.000724222	0.000865384	0.000467601	0.000503657	3.24557e-05	1.06295e-05	0	0	0	0	0	5.03955e-06	0	Bacteria;Chloroflexi;SAR202 clade
g_test	inactive chimneys vs other sites	New.ReferenceOTU2037	268.885	0	5	0	0	0	0	4.80825e-06	2.65737e-05	1.71569e-06	0	0	0.00121422	0.000373701	0	0	Bacteria;Proteobacteria;Gammaproteobacteria;Thiotrichales;Thiotrichaceae;uncultured
g_test	inactive chimneys vs other sites	CP001899.1403988.1405498	268.751	0	6	0	0	0	0	6.01032e-06	3.18884e-05	1.71569e-06	0.000707601	0.00271256	0	2.7478e-06	0	0	Archaea;Euryarchaeota;Archaeoglobi;Archaeoglobales;Archaeoglobaceae;Archaeoglobus
g_test	inactive chimneys vs other sites	DU758324.1.973	268.007	0	7	0.000704104	0.000549502	0.000819217	0.000353819	2.52433e-05	8.8579e-06	0	0	0	0	1.3739e-06	0	0	Archaea;Euryarchaeota;Thermoplasmata;Thermoplasmatales;Marine Group II
g_test	inactive chimneys vs other sites	JN873940.1.1483	267.412	0	8	0	0	4.88356e-06	0	4.80825e-05	0.000189559	0.000667404	0.000151138	6.01011e-06	0.00347378	2.7478e-05	0	0	Bacteria;Proteobacteria;Epsilonproteobacteria;Campylobacterales;Helicobacteraceae;Sulfurimonas;uncultured bacterium
g_test	inactive chimneys vs other sites	AY531590.1.1473	266.473	0	8	0	0	0.000360162	1.38506e-05	0.00112152	0.000779495	1.71569e-06	0	0.000416701	0	1.09912e-05	3.3597e-06	0	Bacteria;Proteobacteria;Epsilonproteobacteria;Campylobacterales;Campylobacteraceae;Campylobacter;uncultured bacterium
g_test	inactive chimneys vs other sites	FJ348469.1.1394	265.019	0	6	0	0	0	0	4.80825e-06	4.96042e-05	0	0	0	4.27542e-06	0.000978218	1.67985e-06	0.000284301	Bacteria;Bacteroidetes;Flavobacteriia;Flavobacteriales;Flavobacteriaceae
g_test	inactive chimneys vs other sites	HQ529849.1.917	264.147	0	8	0.000731959	0.000505081	0.000893691	0.000270716	2.76475e-05	1.77158e-05	0	0	0	0	1.3739e-06	1.67985e-06	0	Archaea;Euryarchaeota;Thermoplasmata;Thermoplasmatales;Marine Group II
g_test	inactive chimneys vs other sites	KC682643.1.1516	263.905	0	8	0.000402345	0.000251718	0.000234411	0.000123396	1.44248e-05	1.41726e-05	0	0	0	0	0.000392936	0	0.00287905	Bacteria;Proteobacteria;Deltaproteobacteria;Sh765B-TzT-29;uncultured bacterium;uncultured bacterium;uncultured bacterium
g_test	inactive chimneys vs other sites	HQ807406.1.1453	263.26	0	8	9.28489e-06	1.64522e-06	3.66267e-06	0	3.60619e-06	0	0	0	1.20202e-05	0	4.12171e-06	0.00137244	2.00212e-06	Bacteria;Proteobacteria;Gammaproteobacteria;Enterobacteriales;Enterobacteriaceae;Escherichia-Shigella
g_test	inactive chimneys vs other sites	FJ905648.1.1365	262.43	0	4	0	0	0	0	0	5.31474e-06	0	0	0	1.06886e-05	0.000326989	0	0.00105912	Bacteria;Chlorobi;Chlorobia;Chlorobiales;OPB56;uncultured bacterium;uncultured bacterium
g_test	inactive chimneys vs other sites	HQ672859.1.1508	260.935	0	7	0.000369848	0.00102003	0.000255166	0.000800815	1.56268e-05	7.08632e-06	0	0	0	0	1.3739e-06	0	0	Bacteria;Deferribacteres;Deferribacteres;Deferribacterales;SAR406 clade(Marine group A);uncultured bacterium;uncultured bacterium
g_test	inactive chimneys vs other sites	New.ReferenceOTU720	260.782	0	5	0	1.64522e-06	7.56951e-05	0	0.00189926	0.000136412	0	0	0	0	0	1.67985e-06	0	Bacteria;Proteobacteria;Gammaproteobacteria;Alteromonadales;Psychromonadaceae;Psychromonas
g_test	inactive chimneys vs other sites	JN717172.1.1453	260.682	0	7	1.54748e-06	1.64522e-06	3.66267e-06	0	3.60619e-06	0.000494271	0	0	0	8.55085e-06	0.00169402	0	0	Bacteria;Bacteroidetes;Flavobacteriia;Flavobacteriales;Flavobacteriaceae;Maritimimonas
g_test	inactive chimneys vs other sites	JX878923.1.1423	259.552	0	7	0.000770646	0.000758444	0.000616549	0.000289603	8.41444e-06	1.94874e-05	0	0	0	0	0	1.67985e-06	0	Bacteria;Proteobacteria;Alphaproteobacteria;Rhodospirillales;Rhodospirillaceae;uncultured
g_test	inactive chimneys vs other sites	HQ664700.1.1337	258.383	0	5	0	0	0	0	7.21238e-06	1.24011e-05	0	0	0	4.27542e-06	0.00106477	0	2.80297e-05	Bacteria;Bacteroidetes;Flavobacteriia;Flavobacteriales;Flavobacteriaceae
g_test	inactive chimneys vs other sites	New.ReferenceOTU383	258.084	0	6	0	0	3.66267e-05	1.25914e-06	0.00190287	3.54316e-05	1.71569e-06	0	9.01516e-05	0	0	0	0	Bacteria;Proteobacteria;Epsilonproteobacteria;Nautiliales;Nautiliaceae;Caminibacter;uncultured bacterium
g_test	inactive chimneys vs other sites	FN562908.1.1347	258.076	0	8	0	1.64522e-06	1.22089e-06	0	9.4963e-05	0.000239163	0	0	4.00674e-06	0.00075675	0.00102905	0	7.20764e-05	Bacteria;Bacteroidetes;Flavobacteriia;Flavobacteriales;Flavobacteriaceae;uncultured
g_test	inactive chimneys vs other sites	EU491193.1.1462	256.938	0	7	0.000789216	0.000746928	0.000487135	0.000404185	8.41444e-06	7.08632e-06	0	0	0	0	1.3739e-06	0	0	Bacteria;Proteobacteria;Alphaproteobacteria;Rhodospirillales;Rhodospirillaceae;uncultured;uncultured bacterium
g_test	inactive chimneys vs other sites	DQ071079.1.1438	254.838	0	12	2.78547e-05	1.15165e-05	6.22654e-05	3.5256e-05	0.00263612	0.00236152	0.000849268	0.0071241	0	0.00280682	0.000149755	3.3597e-06	1.80191e-05	Bacteria;Proteobacteria;Epsilonproteobacteria;Campylobacterales;Helicobacteraceae;Sulfurimonas;uncultured bacterium
g_test	inactive chimneys vs other sites	New.ReferenceOTU1363	254.173	0	4	0	0	1.22089e-06	0	0	7.08632e-06	0	0	0	0	8.24341e-06	0	0.00149959	Bacteria;Bacteroidetes;Sphingobacteriia;Sphingobacteriales;Saprospiraceae;Portibacter;uncultured bacterium
g_test	inactive chimneys vs other sites	AB842286.1.1461	254.112	0	8	0	0	2.44178e-06	0	2.76475e-05	0.00054919	6.86277e-06	0	0	0.000194532	0.000747403	0.000154546	0.00110317	Bacteria;Verrucomicrobia;Verrucomicrobiae;Verrucomicrobiales;DEV007;uncultured bacterium;uncultured bacterium
g_test	inactive chimneys vs other sites	GQ261778.1.1464	253.874	0	4	0	0	0	0	0	0.000138183	0	0	0	0	0.000719925	1.67985e-06	0.000778826	Bacteria;Bacteroidetes;Cytophagia;Cytophagales;Flammeovirgaceae;uncultured;uncultured bacterium
g_test	inactive chimneys vs other sites	New.ReferenceOTU492	253.463	0	4	0	0	0	0	0.000512079	1.94874e-05	0.00162305	0.000458567	0	0	0	0	0	Bacteria;Proteobacteria;Epsilonproteobacteria;Campylobacterales;Helicobacteraceae;Sulfurovum;uncultured epsilon proteobacterium
g_test	inactive chimneys vs other sites	JX226879.1.1519	252.539	0	6	0.000324971	0.00129972	0.000327198	0.000441959	2.76475e-05	3.54316e-06	0	0	0	0	0	0	0	Bacteria;Proteobacteria;Deltaproteobacteria;Sh765B-TzT-29
g_test	inactive chimneys vs other sites	New.ReferenceOTU556	249.104	0	6	0	0	1.22089e-06	0	0	1.24011e-05	3.43139e-06	3.43496e-06	1.6027e-05	0.00167169	0	0	0	Bacteria;Bacteroidetes;Flavobacteriia;Flavobacteriales;Flavobacteriaceae;Lutibacter;uncultured bacterium
g_test	inactive chimneys vs other sites	JQ221328.1.915	248.842	0	6	0.000798501	0.000396497	0.000875378	0.00016117	2.04351e-05	1.77158e-06	0	0	0	0	0	0	0	Archaea;Euryarchaeota;Thermoplasmata;Thermoplasmatales;Marine Group III
g_test	inactive chimneys vs other sites	AJ441225.1.1439	248.771	0	6	0	0	2.31969e-05	0	0.00157711	0.000800754	0	0	0	1.28263e-05	5.49561e-06	1.67985e-06	0	Bacteria;Lentisphaerae;Oligosphaeria;uncultured bacterium;uncultured bacterium;uncultured bacterium;uncultured bacterium
g_test	inactive chimneys vs other sites	HQ153914.1.1359	247.884	0	4	0	0	0	0	0	1.06295e-05	0	0	0	1.71017e-05	0.000923262	0	0.000120127	Bacteria;Planctomycetes;Planctomycetacia;Planctomycetales;Planctomycetaceae;Pir4 lineage;uncultured bacterium
g_test	inactive chimneys vs other sites	ABCJ01000018.7593.9105	247.61	0	7	0	0	3.2964e-05	1.25914e-06	0.00131866	1.94874e-05	0.000708581	5.15243e-05	6.61112e-05	0	0	0	0	Bacteria;Proteobacteria;Epsilonproteobacteria;Nautiliales;Nautiliaceae;Caminibacter
g_test	inactive chimneys vs other sites	JQ221621.1.913	246.993	0	6	0.000783026	0.000513307	0.000731313	0.000219091	1.44248e-05	8.8579e-06	0	0	0	0	0	0	0	Archaea;Euryarchaeota;Thermoplasmata;Thermoplasmatales;Marine Group III;uncultured marine archaeon;uncultured marine archaeon
g_test	inactive chimneys vs other sites	HQ673484.1.1485	246.685	0	6	0.000766004	0.000534695	0.000555505	0.00038152	2.52433e-05	1.24011e-05	0	0	0	0	0	0	0	Bacteria;Bacteroidetes;Flavobacteriia;Flavobacteriales;NS9 marine group;uncultured bacterium;uncultured bacterium
g_test	inactive chimneys vs other sites	DQ396361.1.1525	244.991	0	6	3.09496e-06	0.00122075	0.000131856	1.88871e-05	0.000521695	0.000520844	0	0	0	0	0	0	0	Bacteria;Proteobacteria;Alphaproteobacteria;Caulobacterales;Hyphomonadaceae;Henriciella
g_test	inactive chimneys vs other sites	JQ611207.1.1361	244.221	0	6	0.000914562	0.000863738	4.02894e-05	0.000491066	3.60619e-05	3.72032e-05	0	0	0	0	0	0	0	Bacteria;Proteobacteria;Alphaproteobacteria;Rhodospirillales;Rhodospirillaceae;AEGEAN-169 marine group;uncultured bacterium
g_test	inactive chimneys vs other sites	New.ReferenceOTU1865	243.46	0	5	0	0	2.07551e-05	0	0.00160355	0.000566905	0	0	0	8.55085e-06	1.3739e-06	0	0	Bacteria;Proteobacteria;Gammaproteobacteria;Oceanospirillales;Hahellaceae;Kistimonas;uncultured bacterium
g_test	inactive chimneys vs other sites	AM110958.1.1490	243.297	0	7	1.54748e-06	0	2.44178e-06	0.000674901	0.00123813	1.59442e-05	5.14708e-06	5.15243e-06	0	0	0	0	0	Bacteria;Proteobacteria;Gammaproteobacteria;Alteromonadales;Pseudoalteromonadaceae;Pseudoalteromonas
g_test	inactive chimneys vs other sites	JN874212.1.1472	241.842	0	10	0	1.64522e-06	7.81369e-05	0	0.000971267	0.00132514	0.000965935	7.21341e-05	0.000258435	0.000138951	2.47302e-05	1.67985e-06	0	Bacteria;Proteobacteria;Epsilonproteobacteria;Campylobacterales;Helicobacteraceae;Sulfurovum;uncultured epsilon proteobacterium
g_test	inactive chimneys vs other sites	New.ReferenceOTU569	241.602	0	4	0	0	1.46507e-05	0	0.00162158	4.60611e-05	0.000319119	0	0	0	0	0	0	Bacteria;Bacteroidetes;VC2,1 Bac22;uncultured bacterium;uncultured bacterium;uncultured bacterium;uncultured bacterium
g_test	inactive chimneys vs other sites	New.ReferenceOTU513	241.448	0	5	0	0	0	0	0.000201947	1.24011e-05	0.000830395	6.86991e-06	0.00182106	0	0	0	0	Bacteria;Chloroflexi;Anaerolineae;Anaerolineales;Anaerolineaceae;uncultured
g_test	inactive chimneys vs other sites	HQ673154.1.1518	240.336	0	7	0.000376038	0.000909804	0.000432195	0.000532617	6.01032e-06	1.59442e-05	0	0	0	0	0	1.67985e-06	0	Bacteria;Proteobacteria;Gammaproteobacteria;Xanthomonadales;uncultured;uncultured gamma proteobacterium;uncultured gamma proteobacterium
g_test	inactive chimneys vs other sites	New.ReferenceOTU1396	238.959	0	6	0	0	0.000166041	0	0.00159995	1.06295e-05	0.000138971	9.96137e-05	0	0	0	5.03955e-06	0	Bacteria;Proteobacteria;Epsilonproteobacteria;Nautiliales;Nautiliaceae;Thioreductor
g_test	inactive chimneys vs other sites	FJ644583.1.1366	237.443	0	6	0.000459602	0.0014955	0.000161157	0.000226646	1.20206e-05	3.18884e-05	0	0	0	0	0	0	0	Bacteria;Bacteroidetes;Flavobacteriia;Flavobacteriales;Flavobacteriaceae;Muricauda
g_test	inactive chimneys vs other sites	AB095133.1.1040	235.987	0	6	0	0	0	0	1.44248e-05	1.77158e-05	0	0.00118678	0.00182106	8.55085e-06	0	1.67985e-06	0	Archaea;Euryarchaeota;Halobacteria;Halobacteriales;Miscellaneous Euryarchaeotic Group(MEG);uncultured archaeon;uncultured archaeon
g_test	inactive chimneys vs other sites	New.ReferenceOTU662	235.303	0	5	0	0	0	0	3.60619e-06	5.31474e-06	0	1.71748e-06	0.00313527	4.27542e-06	0	0	0	Bacteria;Proteobacteria;Epsilonproteobacteria;Nautiliales;Nautiliaceae;Nitratifractor;uncultured bacterium
g_test	inactive chimneys vs other sites	JQ712383.1.1385	235.11	0	8	1.54748e-06	0	1.46507e-05	1.25914e-06	0.00163721	0.000294082	1.54412e-05	3.43496e-06	0	0	0	1.67985e-06	0	Bacteria;Proteobacteria;Epsilonproteobacteria;Campylobacterales;Campylobacteraceae;Arcobacter;uncultured epsilon proteobacterium
g_test	inactive chimneys vs other sites	AY726958.1.1231	234.671	0	6	0.000368301	0.000932837	0.000354058	0.000531358	4.80825e-06	1.24011e-05	0	0	0	0	0	0	0	Bacteria;Proteobacteria;Gammaproteobacteria;E01-9C-26 marine group;uncultured bacterium;uncultured bacterium;uncultured bacterium
g_test	inactive chimneys vs other sites	New.ReferenceOTU180	234.363	0	6	0	0	5.12774e-05	0	0.00143767	0.000196645	1.88726e-05	0.000180335	0.000122206	0	0	0	0	Bacteria;Candidate division SR1;uncultured bacterium;uncultured bacterium;uncultured bacterium;uncultured bacterium;uncultured bacterium
g_test	inactive chimneys vs other sites	HQ674091.1.1456	234.209	0	6	0.000501384	0.00091803	0.000467601	0.000288344	2.52433e-05	1.77158e-05	0	0	0	0	0	0	0	Bacteria;Actinobacteria;Acidimicrobiia;Acidimicrobiales;Sva0996 marine group;uncultured bacterium;uncultured bacterium
g_test	inactive chimneys vs other sites	New.ReferenceOTU440	234.188	0	7	0	0	1.46507e-05	0	0.000439955	0.0013464	1.71569e-05	3.09146e-05	0.000763284	0	1.3739e-06	0	0	Bacteria;Proteobacteria;Epsilonproteobacteria;Campylobacterales;Campylobacteraceae;Campylobacter;uncultured epsilon proteobacterium
g_test	inactive chimneys vs other sites	FN562888.1.1300	233.407	0	7	1.54748e-06	1.64522e-06	3.41849e-05	0	0.000295708	0.00294082	0	0	0	3.42034e-05	2.88519e-05	0	0	Bacteria;Candidate division OD1;uncultured bacterium;uncultured bacterium;uncultured bacterium;uncultured bacterium;uncultured bacterium
g_test	inactive chimneys vs other sites	AB476178.1.1453	230.786	0	7	0	0	2.44178e-06	0	1.56268e-05	7.26348e-05	6.86277e-06	0	4.00674e-06	0.0012698	0.000303632	0	0	Bacteria;Proteobacteria;Gammaproteobacteria;Thiotrichales;Thiotrichaceae;Cocleimonas
g_test	inactive chimneys vs other sites	DQ070806.1.1401	230.774	0	6	3.09496e-06	0	1.22089e-06	0	1.20206e-06	1.24011e-05	0	0	0	0	0.000424536	0	0.00079284	Bacteria;Proteobacteria;Gammaproteobacteria;Xanthomonadales;JTB255 marine benthic group;uncultured bacterium;uncultured bacterium
g_test	inactive chimneys vs other sites	New.ReferenceOTU1629	230.05	0	6	0	0	3.66267e-06	0	3.60619e-06	1.06295e-05	3.43139e-05	0.00248691	3.60607e-05	0	0	0	0	Unassigned
g_test	inactive chimneys vs other sites	New.ReferenceOTU2614	229.163	0	7	0	0	0	0	0.000174299	2.1259e-05	8.75003e-05	1.71748e-06	0.00268251	4.27542e-06	1.3739e-06	0	0	Bacteria;Candidate division OP9;uncultured bacterium;uncultured bacterium;uncultured bacterium;uncultured bacterium;uncultured bacterium
g_test	inactive chimneys vs other sites	JQ287040.1.1457	228.905	0	5	0	0	4.88356e-06	0	4.80825e-06	0	0	0	0	0	5.49561e-06	5.03955e-06	0.00136945	Bacteria;Proteobacteria;Alphaproteobacteria;Rhodospirillales;Rhodospirillaceae;Magnetovibrio;uncultured Rhodospirillaceae bacterium
g_test	inactive chimneys vs other sites	AB250697.1.1340	228.094	0	6	0	1.64522e-06	0.000106217	0	0.00127779	0.00071749	0	0	0	6.41313e-06	0	1.67985e-06	0	Bacteria;Proteobacteria;Epsilonproteobacteria;Campylobacterales;Helicobacteraceae;uncultured
g_test	inactive chimneys vs other sites	KC682726.1.1520	227.788	0	7	0.000422463	0.000913095	0.000492018	0.000358856	3.60619e-06	7.08632e-06	0	0	0	0	0	0	4.00424e-06	Bacteria;Planctomycetes;Pla3 lineage;uncultured bacterium;uncultured bacterium;uncultured bacterium;uncultured bacterium
g_test	inactive chimneys vs other sites	New.CleanUp.ReferenceOTU711199	226.828	0	4	0	0	0	0	2.40413e-06	3.366e-05	0	0	0	1.06886e-05	0.000980966	0	0	Bacteria;Planctomycetes;OM190
g_test	inactive chimneys vs other sites	HQ674446.1.1499	226.353	0	6	0.00041163	0.000804511	0.000400452	0.000467142	1.44248e-05	1.41726e-05	0	0	0	0	0	0	0	Bacteria;Acidobacteria;Acidobacteria;Subgroup 21;uncultured bacterium;uncultured bacterium;uncultured bacterium
g_test	inactive chimneys vs other sites	New.ReferenceOTU1255	225.891	0	4	0	0	2.44178e-06	0	0	0	1.71569e-06	0.000355518	0.00252625	0	0	0	0	Bacteria;Proteobacteria;Epsilonproteobacteria;Nautiliales;Nautiliaceae;Nitratifractor;uncultured bacterium
g_test	inactive chimneys vs other sites	New.CleanUp.ReferenceOTU528104	224.874	0	5	1.54748e-06	0	2.07551e-05	0	0.000534918	0.00184421	0	0	0	4.27542e-06	0	0	0	Bacteria;Proteobacteria;Gammaproteobacteria;Oceanospirillales;SUP05 cluster;uncultured bacterium;uncultured bacterium
g_test	inactive chimneys vs other sites	AM997919.1.1471	222.815	0	7	0.000696367	0.000590632	0.00049446	0.000302194	1.20206e-05	1.59442e-05	0	0	0	0	1.3739e-06	0	0	Bacteria;Chloroflexi;SAR202 clade;uncultured bacterium;uncultured bacterium;uncultured bacterium;uncultured bacterium
g_test	inactive chimneys vs other sites	JX878991.1.1406	222.81	0	6	0.000543166	0.000603794	0.000394347	0.000506175	2.40413e-06	1.06295e-05	0	0	0	0	0	0	0	Bacteria;Proteobacteria;Alphaproteobacteria;SAR11 clade;Deep 1;uncultured bacterium;uncultured bacterium
g_test	inactive chimneys vs other sites	New.ReferenceOTU124	222.421	0	6	0	0	1.70925e-05	0	0.000657529	0.0012844	0.000343139	3.43496e-06	0	0	2.7478e-06	0	0	Bacteria;Proteobacteria;Epsilonproteobacteria;Campylobacterales;Campylobacteraceae;Arcobacter
g_test	inactive chimneys vs other sites	JQ678445.1.1523	221.424	0	6	0.000543166	0.000564309	0.000533529	0.000382779	3.60619e-06	7.08632e-06	0	0	0	0	0	0	0	Bacteria;Proteobacteria;Deltaproteobacteria;Sh765B-TzT-29;uncultured bacterium;uncultured bacterium;uncultured bacterium
g_test	inactive chimneys vs other sites	JQ678351.1.1508	221.27	0	6	0.000394608	0.000514953	0.00042487	0.000637126	2.04351e-05	3.54316e-06	0	0	0	0	0	0	0	Bacteria;Acidobacteria;Acidobacteria;Subgroup 6
g_test	inactive chimneys vs other sites	New.ReferenceOTU1434	221.012	0	9	0	0	0	0	1.20206e-05	2.65737e-05	3.77452e-05	3.43496e-06	2.00337e-06	0.000699032	0.000522083	7.72731e-05	2.00212e-05	Bacteria;Proteobacteria;Alphaproteobacteria;Rhodobacterales;Rhodobacteraceae;uncultured;uncultured bacterium
g_test	inactive chimneys vs other sites	EU555124.1.1480	220.07	0	10	1.54748e-06	1.64522e-06	1.46507e-05	0	0.000340184	0.00350241	1.71569e-06	3.43496e-06	2.20371e-05	1.4964e-05	0.000125025	0	0	Bacteria;Proteobacteria;Gammaproteobacteria;Thiotrichales;Thiotrichaceae;uncultured;uncultured bacterium
g_test	inactive chimneys vs other sites	HQ631954.1.1456	219.884	0	6	3.55921e-05	5.26469e-05	3.66267e-06	0.00170614	2.04351e-05	3.54316e-06	0	0	0	0	0	0	0	Bacteria;Proteobacteria;Gammaproteobacteria;Oceanospirillales;Halomonadaceae;Salinicola
g_test	inactive chimneys vs other sites	New.ReferenceOTU1982	218.244	0	7	0	0	1.34298e-05	0	0.000668347	0.000618281	0.00136569	5.15243e-06	0	1.4964e-05	2.33563e-05	0	0	Bacteria;Bacteroidetes;Sphingobacteriia;Sphingobacteriales;WCHB1-69
g_test	inactive chimneys vs other sites	New.ReferenceOTU782	218.204	0	9	0	1.64522e-06	1.22089e-06	1.25914e-06	0.000281283	1.41726e-05	0.00177403	0.000233577	5.60944e-05	2.13771e-06	0	0	0	Bacteria;Proteobacteria;Epsilonproteobacteria;Campylobacterales;Helicobacteraceae;Sulfurovum
g_test	inactive chimneys vs other sites	HQ652525.1.1415	218.19	0	6	0.000386871	0.00102168	0.000229527	0.000441959	6.01032e-06	1.06295e-05	0	0	0	0	0	0	0	Bacteria;Acidobacteria;Subgroup 26;uncultured bacterium;uncultured bacterium;uncultured bacterium;uncultured bacterium
g_test	inactive chimneys vs other sites	New.ReferenceOTU820	218.152	0	7	3.09496e-06	3.29043e-06	9.76712e-06	0	0.000252433	0.00744772	0	0	0	0.000795229	0.000222572	0	0	Unassigned
g_test	inactive chimneys vs other sites	New.ReferenceOTU1220	218.035	0	6	0.000674702	0.000579116	0.000345512	0.000424331	9.61651e-06	7.08632e-06	0	0	0	0	0	0	0	Bacteria;Chloroflexi;SAR202 clade
g_test	inactive chimneys vs other sites	AF068792.1.1449	217.881	0	5	0	0	0.000112322	0	0.000351002	0.000334829	0	3.43496e-06	0.00169084	0	0	0	0	Bacteria;Aquificae;Aquificae;Aquificales;Hydrogenothermaceae
g_test	inactive chimneys vs other sites	ABEF01046320.1.1206	217.419	0	6	0.000541619	0.000671248	0.000528645	0.000263161	9.61651e-06	1.41726e-05	0	0	0	0	0	0	0	Bacteria;Chloroflexi;SAR202 clade
g_test	inactive chimneys vs other sites	AY534096.1.1494	214.823	0	7	0.000671607	0.000557728	0.000373592	0.000410481	1.68289e-05	3.54316e-06	0	0	0	0	1.3739e-06	0	0	Bacteria;Chloroflexi;SAR202 clade;uncultured Chloroflexi bacterium;uncultured Chloroflexi bacterium;uncultured Chloroflexi bacterium;uncultured Chloroflexi bacterium
g_test	inactive chimneys vs other sites	New.CleanUp.ReferenceOTU271127	214.298	0	6	0	1.64522e-06	0	0	9.13568e-05	0.000430494	1.71569e-06	0	0	0.000277902	0.00135879	0	0	Bacteria;Proteobacteria;Alphaproteobacteria;Rhodobacterales;Rhodobacteraceae;uncultured
g_test	inactive chimneys vs other sites	New.CleanUp.ReferenceOTU1096338	214.137	0	4	0	0	0	0	0	1.77158e-05	8.57846e-06	0	0	0.00107313	0.000226694	0	0	Bacteria;Proteobacteria;Gammaproteobacteria;Thiotrichales;Piscirickettsiaceae;Thiomicrospira;uncultured bacterium
g_test	inactive chimneys vs other sites	FR686150.1.1423	214.062	0	5	0	0	0	0	1.20206e-06	0.000109838	0	0	0	0.000164604	0.000935627	0	1.6017e-05	Bacteria;Proteobacteria;Alphaproteobacteria;Rhodobacterales;Rhodobacteraceae;Pelagicola;uncultured bacterium
g_test	inactive chimneys vs other sites	AY704387.1.1461	214.031	0	5	0.000618993	0.000667958	0.000394347	0.000322341	1.08186e-05	0	0	0	0	0	0	0	0	Bacteria;Chloroflexi;SAR202 clade;uncultured Chloroflexi bacterium;uncultured Chloroflexi bacterium;uncultured Chloroflexi bacterium;uncultured Chloroflexi bacterium
g_test	inactive chimneys vs other sites	AY327886.1.1491	213.955	0	7	0	0	0	0	0.000165885	0.00014527	0.000579904	1.71748e-06	0.00198935	1.06886e-05	8.24341e-06	0	0	Bacteria;Proteobacteria;Deltaproteobacteria;Desulfobacterales;Desulfobulbaceae;Desulfobulbus;uncultured bacterium
g_test	inactive chimneys vs other sites	HQ721407.1.1472	213.261	0	6	0.000324971	0.000791349	0.000416323	0.000431886	9.61651e-06	1.06295e-05	0	0	0	0	0	0	0	Bacteria;Acidobacteria;Acidobacteria;Subgroup 6
g_test	inactive chimneys vs other sites	HQ673189.1.1515	213.261	0	6	0.000359016	0.000853867	0.000344291	0.000410481	2.88495e-05	1.06295e-05	0	0	0	0	0	0	0	Bacteria;Proteobacteria;Deltaproteobacteria;Desulfurellales;Desulfurellaceae;uncultured;uncultured bacterium
g_test	inactive chimneys vs other sites	JQ712438.1.1381	212.952	0	5	0	0	0	0	0.000241615	6.37769e-05	0.00195761	1.20223e-05	4.00674e-06	0	0	0	0	Bacteria;Proteobacteria;Epsilonproteobacteria;Campylobacterales;Helicobacteraceae;Sulfurovum;uncultured epsilon proteobacterium
g_test	inactive chimneys vs other sites	JN811705.1.1413	212.182	0	5	0.000374491	0	3.66267e-05	7.55486e-06	0.000562566	0.00112672	0	0	0	0	0	0	0	Bacteria;Proteobacteria;Gammaproteobacteria;Thiotrichales;Piscirickettsiaceae;Methylophaga
g_test	inactive chimneys vs other sites	AY672499.1.1488	211.243	0	10	0	1.64522e-06	9.52294e-05	0	0.000572182	0.000921221	0.000374021	0.000549593	1.20202e-05	2.77902e-05	6.86951e-06	1.67985e-06	0	Bacteria;Proteobacteria;Epsilonproteobacteria;Campylobacterales;Helicobacteraceae;Sulfurovum;uncultured bacterium
g_test	inactive chimneys vs other sites	AY280413.1.1402	209.595	0	8	0	0	1.0988e-05	0	0.00105421	0.00159088	2.2304e-05	0.000133963	0	6.62691e-05	2.33563e-05	3.3597e-06	0	Bacteria;BD1-5;uncultured bacterium;uncultured bacterium;uncultured bacterium;uncultured bacterium;uncultured bacterium
g_test	inactive chimneys vs other sites	New.ReferenceOTU40	209.043	0	8	0	0	1.58716e-05	0	0.000592617	0.00034723	0.00135197	0.000467154	0.000264445	0.000104748	5.49561e-06	0	0	Bacteria;Proteobacteria;Epsilonproteobacteria;Campylobacterales;Helicobacteraceae;Sulfurovum;uncultured bacterium
g_test	inactive chimneys vs other sites	JQ712475.1.1305	208.948	0	7	1.54748e-06	0	1.70925e-05	0	0.000502462	0.00107712	2.2304e-05	1.20223e-05	0.000601011	0	0	0	0	Bacteria;Proteobacteria;Epsilonproteobacteria;Campylobacterales;Campylobacteraceae;Campylobacter;uncultured epsilon proteobacterium
g_test	inactive chimneys vs other sites	New.ReferenceOTU1889	208.382	0	4	0	0	0	0	1.20206e-06	0	1.71569e-06	0	0	9.40593e-05	0.000780376	0	0	Bacteria;Bacteroidetes;Flavobacteriia;Flavobacteriales;Cryomorphaceae;Crocinitomix;uncultured Crocinitomix sp,
g_test	inactive chimneys vs other sites	JQ678471.1.1492	208.369	0	7	0.000502932	0.000577471	0.000526203	0.0003236	1.32227e-05	7.08632e-06	0	0	0	0	0	0	2.00212e-06	Bacteria;Chloroflexi;SAR202 clade;uncultured bacterium;uncultured bacterium;uncultured bacterium;uncultured bacterium
g_test	inactive chimneys vs other sites	New.ReferenceOTU1883	208.359	0	4	0	0	1.22089e-06	0	0	0	0	0	0	8.55085e-06	0.000428657	0.000490516	0	Bacteria;Proteobacteria;Gammaproteobacteria;Gammaproteobacteria Incertae Sedis;Unknown Family
g_test	inactive chimneys vs other sites	HQ672705.1.1451	207.601	0	7	0.000485909	0.000523179	0.000419986	0.000479733	1.20206e-05	1.24011e-05	0	0	0	0	0	0	2.00212e-06	Bacteria;Proteobacteria;Alphaproteobacteria;SAR11 clade;uncultured bacterium;uncultured bacterium;uncultured bacterium
g_test	inactive chimneys vs other sites	New.ReferenceOTU1354	207.573	0	11	0	0	0.000888807	6.29571e-06	0.000394277	0.00090882	0.000137255	1.20223e-05	1.80303e-05	6.41313e-06	2.88519e-05	3.3597e-06	2.00212e-06	Bacteria;Proteobacteria;Epsilonproteobacteria;Campylobacterales;Helicobacteraceae;Sulfurovum;uncultured epsilon proteobacterium
g_test	inactive chimneys vs other sites	New.ReferenceOTU309	207.341	0	9	0.000490552	2.3033e-05	0.000284467	0.000817184	0.000247625	2.65737e-05	0	0	0	0	1.3739e-06	5.03955e-06	2.00212e-06	Bacteria;Proteobacteria;Gammaproteobacteria;Alteromonadales;Alteromonadaceae;uncultured;uncultured bacterium
g_test	inactive chimneys vs other sites	JX879020.1.1408	207.099	0	6	0.00042401	0.000783123	0.00032964	0.000400407	1.20206e-05	1.77158e-06	0	0	0	0	0	0	0	Bacteria;Proteobacteria;Alphaproteobacteria;Rhodospirillales;Rhodospirillaceae;AEGEAN-169 marine group;uncultured bacterium
g_test	inactive chimneys vs other sites	EF441910.1.1412	206.492	0	9	0	0	0.000608003	7.55486e-06	0.00121649	0.000699774	9.77945e-05	5.15243e-06	0	0.000132538	2.7478e-06	3.3597e-06	0	Bacteria;Proteobacteria;Epsilonproteobacteria;Campylobacterales;Campylobacteraceae;Arcobacter;uncultured epsilon proteobacterium
g_test	inactive chimneys vs other sites	New.CleanUp.ReferenceOTU652289	205.911	0	6	0.00044877	7.56799e-05	0.00120502	4.65883e-05	3.60619e-06	0	0	0	0	0	0	0	2.00212e-06	Bacteria;Proteobacteria;Gammaproteobacteria;Oceanospirillales;Halomonadaceae;Halomonas
g_test	inactive chimneys vs other sites	GQ377775.1.1249	205.713	0	6	0.000470435	0.000682765	0.000470042	0.000261902	2.52433e-05	1.24011e-05	0	0	0	0	0	0	0	Bacteria;Planctomycetes;Planctomycetacia;Planctomycetales;Planctomycetaceae;Planctomyces;uncultured bacterium
g_test	inactive chimneys vs other sites	JQ678459.1.1487	205.296	0	7	0.000566378	0.000516598	0.000465159	0.000358856	1.20206e-05	5.31474e-06	0	0	0	0	1.3739e-06	0	0	Bacteria;Bacteroidetes;Sphingobacteriia;Sphingobacteriales;WCHB1-69;uncultured bacterium;uncultured bacterium
g_test	inactive chimneys vs other sites	JN662175.1.1383	204.715	0	7	1.54748e-06	0	2.44178e-05	0	0.000688782	0.00221802	3.43139e-06	0	0	1.06886e-05	6.31995e-05	0	0	Bacteria;Candidate division OD1;uncultured bacterium;uncultured bacterium;uncultured bacterium;uncultured bacterium;uncultured bacterium
g_test	inactive chimneys vs other sites	FR853039.1.1493	204.481	0	5	0	0	3.66267e-06	0	0.00153744	8.32642e-05	3.43139e-06	1.71748e-06	0	0	0	0	0	Bacteria;Proteobacteria;Epsilonproteobacteria;Nautiliales;Nautiliaceae;Nitratifractor;uncultured bacterium
g_test	inactive chimneys vs other sites	New.ReferenceOTU2523	204.24	0	4	0	0	3.66267e-06	0	1.20206e-06	0	0	0	0	0	0.000126399	0	0.00103109	Bacteria;Planctomycetes;Phycisphaerae;Phycisphaerales;Phycisphaeraceae;SM1A02;uncultured bacterium
g_test	inactive chimneys vs other sites	New.ReferenceOTU2367	204.221	0	6	0	0	4.02894e-05	0	0.000293303	0.00181233	0	1.20223e-05	9.01516e-05	0	0	1.67985e-06	0	Bacteria;Proteobacteria;Epsilonproteobacteria;Campylobacterales;Campylobacteraceae;Campylobacter;uncultured bacterium
g_test	inactive chimneys vs other sites	New.ReferenceOTU593	204.173	0	4	0	0	3.66267e-06	1.25914e-06	0.00156028	4.96042e-05	0	0	0	0	0	0	0	Bacteria;Bacteroidetes;Bacteroidia;Bacteroidales;Marinilabiaceae;uncultured;uncultured bacterium
g_test	inactive chimneys vs other sites	New.CleanUp.ReferenceOTU931727	203.628	0	9	0	0	1.22089e-06	0	3.60619e-06	1.59442e-05	1.71569e-06	0	1.00168e-05	0.000540841	0.000430031	8.39925e-06	0.000150159	Bacteria;Proteobacteria;Alphaproteobacteria;Rhodobacterales;Rhodobacteraceae;uncultured;uncultured bacterium
g_test	inactive chimneys vs other sites	EF572256.1.1435	201.092	0	6	0.000742791	0.000605439	4.15102e-05	0.000514989	9.61651e-06	1.94874e-05	0	0	0	0	0	0	0	Bacteria;Proteobacteria;Alphaproteobacteria;SAR11 clade;uncultured bacterium;uncultured bacterium;uncultured bacterium
g_test	inactive chimneys vs other sites	GQ007953.1.1342	200.676	0	6	0	1.97426e-05	3.66267e-06	1.00731e-05	4.80825e-06	0	0	0	4.00674e-05	0	0	0.00116918	0	Bacteria;Actinobacteria;Actinobacteria;Corynebacteriales;Corynebacteriaceae;uncultured;uncultured bacterium
g_test	inactive chimneys vs other sites	GQ349500.1.1386	200.108	0	8	0.000156296	0.000291203	0.000152611	6.54754e-05	1.80309e-05	0	0	0	0	0	4.12171e-06	6.7194e-06	0.00244659	Bacteria;Planctomycetes;Planctomycetacia;Planctomycetales;Planctomycetaceae;Planctomyces;uncultured bacterium
g_test	inactive chimneys vs other sites	New.CleanUp.ReferenceOTU173141	199.706	0	4	0	0	2.31969e-05	0	0.00149897	0	6.86277e-06	0	6.21045e-05	0	0	0	0	Bacteria;Aquificae;Aquificae;Aquificales;Aquificaceae;Aquifex
g_test	inactive chimneys vs other sites	New.ReferenceOTU109	199.398	0	6	0.000385323	0.000814382	0.000378476	0.000297158	2.40413e-06	1.24011e-05	0	0	0	0	0	0	0	Bacteria;Proteobacteria;Deltaproteobacteria;Desulfobacterales;Nitrospinaceae;uncultured;uncultured bacterium
g_test	inactive chimneys vs other sites	New.CleanUp.ReferenceOTU827390	199.174	0	7	0	0	3.66267e-06	0	3.12536e-05	9.21221e-05	0	3.43496e-06	2.00337e-06	0.00157122	2.88519e-05	0	0	Bacteria;Bacteroidetes;Flavobacteriia;Flavobacteriales;Flavobacteriaceae;uncultured
g_test	inactive chimneys vs other sites	New.ReferenceOTU761	199.09	0	8	0	0	9.76712e-06	0	2.04351e-05	0.0015271	1.02942e-05	1.71748e-06	0.000170286	0.00221467	0.000906775	0	0	Bacteria;Bacteroidetes;Flavobacteriia;Flavobacteriales;Flavobacteriaceae;uncultured Bacteroidetes bacterium;uncultured Bacteroidetes bacterium
g_test	inactive chimneys vs other sites	New.CleanUp.ReferenceOTU405768	197.965	0	5	0	0	0	0	0	8.8579e-06	3.43139e-06	0	2.00337e-06	0.00119926	5.49561e-05	0	0	Bacteria;Proteobacteria;Gammaproteobacteria;Methylococcales;Marine Methylotrophic Group 2
g_test	inactive chimneys vs other sites	New.CleanUp.ReferenceOTU23903	197.93	0	7	0	4.93565e-06	1.22089e-06	0	1.44248e-05	0	0	0	0	0.00038265	0.000603143	1.67985e-06	6.00637e-06	Bacteria;Proteobacteria;Alphaproteobacteria;Rhizobiales;Phyllobacteriaceae;Pseudahrensia;uncultured bacterium
g_test	inactive chimneys vs other sites	AB095131.1.1049	197.278	0	8	1.54748e-06	0	1.22089e-06	0	2.40413e-06	7.08632e-06	0.000490688	0.00142722	0.000398671	4.27542e-06	0	0	0	Archaea;Euryarchaeota;Archaeoglobi;Archaeoglobales;Archaeoglobaceae;uncultured;uncultured archaeon
g_test	inactive chimneys vs other sites	New.ReferenceOTU2430	197.189	0	5	0	0	0	0	0	3.54316e-06	0.000125246	0	0.00284278	2.35148e-05	6.86951e-06	0	0	Bacteria;Bacteroidetes;Flavobacteriia;Flavobacteriales;R103-B20;uncultured bacterium;uncultured bacterium
g_test	inactive chimneys vs other sites	FN553949.1.1479	196.894	0	6	0	0	1.22089e-06	0	0	8.8579e-06	0	0	0	2.13771e-06	0.000416292	3.3597e-06	0.000572607	Bacteria;Bacteroidetes;Cytophagia;Cytophagales;Flammeovirgaceae;uncultured;uncultured bacterium
g_test	inactive chimneys vs other sites	New.ReferenceOTU364	196.009	0	6	0.000377586	0.000745283	0.00038458	0.000309749	1.68289e-05	8.8579e-06	0	0	0	0	0	0	0	Unassigned
g_test	inactive chimneys vs other sites	AY672518.1.1495	195.616	0	8	0	0	0.000861948	1.00731e-05	0.000282485	0.000214361	0.000175001	5.15243e-06	0.000242408	2.13771e-06	0	0	0	Bacteria;Proteobacteria;Epsilonproteobacteria;Campylobacterales;Helicobacteraceae;Sulfurovum;uncultured epsilon proteobacterium
g_test	inactive chimneys vs other sites	New.ReferenceOTU1579	195.592	0	7	0.000533881	0.000424466	0.000568934	0.000284566	1.9233e-05	3.54316e-06	0	0	0	0	0	3.3597e-06	0	Bacteria;Chloroflexi;SAR202 clade;uncultured Chloroflexi bacterium;uncultured Chloroflexi bacterium;uncultured Chloroflexi bacterium;uncultured Chloroflexi bacterium
g_test	inactive chimneys vs other sites	New.ReferenceOTU2627	195.085	0	7	0.000314139	0.00108749	0.000184354	0.000302194	1.32227e-05	7.08632e-06	0	0	2.00337e-06	0	0	0	0	Bacteria;Acidobacteria;Acidobacteria;Subgroup 6;uncultured bacterium;uncultured bacterium;uncultured bacterium
g_test	inactive chimneys vs other sites	JQ678356.1.1516	194.007	0	6	0.00022748	0.000978903	0.000247841	0.000386557	1.20206e-05	3.54316e-06	0	0	0	0	0	0	0	Bacteria;Proteobacteria;Gammaproteobacteria;Xanthomonadales;uncultured;uncultured bacterium;uncultured bacterium
g_test	inactive chimneys vs other sites	New.CleanUp.ReferenceOTU326845	191.622	0	7	0.000603518	0.00060873	0.000432195	0.000167466	1.9233e-05	1.24011e-05	0	0	0	0	1.3739e-06	0	0	Bacteria;Planctomycetes;Planctomycetacia;Planctomycetales;Planctomycetaceae;Planctomyces;uncultured bacterium
g_test	inactive chimneys vs other sites	New.ReferenceOTU349	191.234	0	5	0	0	9.40085e-05	0	0.000424328	0.00125251	0	8.07215e-05	0.000124209	0	0	0	0	Bacteria;BD1-5;uncultured Microgenomates bacterium;uncultured Microgenomates bacterium;uncultured Microgenomates bacterium;uncultured Microgenomates bacterium;uncultured Microgenomates bacterium
g_test	inactive chimneys vs other sites	New.ReferenceOTU2486	191.069	0	6	0	0	4.88356e-06	0	1.20206e-06	3.72032e-05	1.71569e-06	0	0	8.55085e-06	0.000855941	0	0	Bacteria;Bacteroidetes;Sphingobacteriia;Sphingobacteriales;Saprospiraceae;uncultured
g_test	inactive chimneys vs other sites	JF152601.1.1366	190.435	0	6	4.64245e-06	6.58086e-06	4.88356e-06	3.77743e-06	2.40413e-06	0	0	0	0	0	0	0.00100791	0	Bacteria;Actinobacteria;Actinobacteria;Corynebacteriales;Corynebacteriaceae;Corynebacterium;uncultured bacterium
g_test	inactive chimneys vs other sites	New.CleanUp.ReferenceOTU670814	190.156	0	4	0	0	4.02894e-05	0	0.00124173	0	0.000238481	5.83943e-05	0	0	0	0	0	Bacteria;Aquificae;Aquificae;Aquificales;Aquificaceae
g_test	inactive chimneys vs other sites	New.ReferenceOTU1966	190.129	0	6	0	0	0	0	0.000193532	3.54316e-06	0.00198677	0	2.60438e-05	2.13771e-06	6.86951e-06	0	0	Bacteria;Bacteroidetes;VC2,1 Bac22
g_test	inactive chimneys vs other sites	New.ReferenceOTU1326	189.318	0	7	0.000191888	0.00110723	0.000181913	0.000368929	1.20206e-05	1.06295e-05	0	0	0	0	1.3739e-06	0	0	Bacteria;Acidobacteria;Acidobacteria;Subgroup 6;uncultured bacterium;uncultured bacterium;uncultured bacterium
g_test	inactive chimneys vs other sites	New.ReferenceOTU1353	188.325	0	6	0	0	0	0	4.20722e-05	1.06295e-05	0.000631375	0.00118334	0.000366617	0	4.12171e-06	0	0	Bacteria;Proteobacteria;Deltaproteobacteria;Desulfurellales;Desulfurellaceae;Hippea
g_test	inactive chimneys vs other sites	New.CleanUp.ReferenceOTU107530	187.757	0	4	0	0	0	0	3.96681e-05	0.000120467	0	0	0	1.28263e-05	0.00101806	0	0	Unassigned
g_test	inactive chimneys vs other sites	New.ReferenceOTU2165	187.167	0	7	0.000496742	0.000534695	0.000432195	0.000269457	2.76475e-05	7.08632e-06	0	0	0	0	1.3739e-06	0	0	Bacteria;Proteobacteria;Gammaproteobacteria;Xanthomonadales;uncultured;uncultured gamma proteobacterium;uncultured gamma proteobacterium
g_test	inactive chimneys vs other sites	New.CleanUp.ReferenceOTU1080266	187.075	0	6	0.00119775	0.000210588	0.000347953	2.89603e-05	7.21238e-06	5.31474e-06	0	0	0	0	0	0	0	Bacteria;Proteobacteria;Gammaproteobacteria;Oceanospirillales;SUP05 cluster
g_test	inactive chimneys vs other sites	HQ673098.1.1447	187.075	0	6	0.00043639	0.000595568	0.000318652	0.000380261	6.01032e-06	1.24011e-05	0	0	0	0	0	0	0	Bacteria;Proteobacteria;Alphaproteobacteria;SAR11 clade
g_test	inactive chimneys vs other sites	KF545023.1.1497	186.86	0	5	0.000433295	6.25182e-05	0.00109392	3.14786e-05	0	0	0	0	0	0	1.3739e-06	0	0	Bacteria;Proteobacteria;Gammaproteobacteria;Oceanospirillales;Halomonadaceae;Halomonas
g_test	inactive chimneys vs other sites	New.ReferenceOTU2402	186.801	0	7	0	0	0	0	7.21238e-06	1.24011e-05	1.71569e-05	3.43496e-06	0	0.000404027	0.000574291	5.03955e-06	0	Bacteria;Proteobacteria;Gammaproteobacteria;Thiotrichales;Piscirickettsiaceae;Thiomicrospira;uncultured gamma proteobacterium
g_test	inactive chimneys vs other sites	HQ674232.1.1463	186.552	0	7	0.00039925	0.000658086	0.000242957	0.000473438	3.60619e-06	1.77158e-06	0	0	0	0	1.3739e-06	0	0	Bacteria;Chloroflexi;SAR202 clade;uncultured marine microorganism;uncultured marine microorganism;uncultured marine microorganism;uncultured marine microorganism
g_test	inactive chimneys vs other sites	HQ166819.1.1307	186.151	0	5	1.54748e-06	1.64522e-06	0	3.77743e-06	0.000385862	0.00157139	0	0	0	0	0	0	0	Bacteria;Proteobacteria;Alphaproteobacteria;Sphingomonadales;Erythrobacteraceae
g_test	inactive chimneys vs other sites	AF356635.1.1411	185.977	0	7	0	0	0	0	2.40413e-05	5.31474e-06	8.57846e-06	2.40447e-05	0.00248017	2.13771e-06	4.12171e-06	0	0	Archaea;Euryarchaeota;Thermoplasmata;Thermoplasmatales;Deep Sea Hydrothermal Vent Gp 2(DHVEG-2);uncultured archaeon;uncultured archaeon
g_test	inactive chimneys vs other sites	New.ReferenceOTU1818	185.492	0	5	0	0	2.44178e-06	0	1.20206e-06	5.84621e-05	0	0	0	0	0.000843576	0	3.00318e-05	Bacteria;Candidate division OD1;uncultured bacterium;uncultured bacterium;uncultured bacterium;uncultured bacterium;uncultured bacterium
g_test	inactive chimneys vs other sites	EU050946.1.1408	184.565	0	8	9.59439e-05	2.13878e-05	2.44178e-05	3.02194e-05	1.20206e-06	0	0	0	0	0	1.3739e-06	1.67985e-06	0.00152762	Bacteria;Verrucomicrobia;Opitutae;Puniceicoccales;Puniceicoccaceae;Cerasicoccus;uncultured bacterium
g_test	inactive chimneys vs other sites	FJ205311.1.1497	184.557	0	4	0	0	1.22089e-06	0	0	0.000249793	0	0	0	2.13771e-06	0	0	0.00159169	Bacteria;Proteobacteria;Zetaproteobacteria;Mariprofundales;Mariprofundaceae;Mariprofundus;uncultured bacterium
g_test	inactive chimneys vs other sites	DQ396281.1.1477	184.149	0	6	0.00023367	0.000829189	0.00028813	0.000380261	4.80825e-06	5.31474e-06	0	0	0	0	0	0	0	Bacteria;Proteobacteria;Alphaproteobacteria;Rhodospirillales;AT-s3-44;uncultured bacterium;uncultured bacterium
g_test	inactive chimneys vs other sites	GQ350571.1.1334	183.687	0	6	0.000580306	0.000482048	0.000328419	0.000289603	2.76475e-05	1.24011e-05	0	0	0	0	0	0	0	Bacteria;Proteobacteria;Alphaproteobacteria;Sneathiellales;Sneathiellaceae;uncultured;uncultured alpha proteobacterium
g_test	inactive chimneys vs other sites	New.ReferenceOTU2511	183.225	0	6	0.000441032	0.000584052	0.000366267	0.000304713	1.32227e-05	1.77158e-06	0	0	0	0	0	0	0	Bacteria;Proteobacteria;Deltaproteobacteria;Desulfobacterales;Nitrospinaceae;uncultured;uncultured bacterium
g_test	inactive chimneys vs other sites	JQ347365.1.1444	183.177	0	5	0	0	0	0	2.16371e-05	0.000141726	0	0	0	6.19936e-05	0.000924636	0	5.20552e-05	Bacteria;Proteobacteria;Alphaproteobacteria;Rhizobiales;Phyllobacteriaceae;Pseudahrensia;uncultured bacterium
g_test	inactive chimneys vs other sites	AY726950.1.1202	182.762	0	6	0.000558641	0.000551147	0.000429753	0.000157393	1.32227e-05	1.24011e-05	0	0	0	0	0	0	0	Bacteria;Proteobacteria;Alphaproteobacteria;Rhodospirillales;Rhodospirillaceae;Defluviicoccus
g_test	inactive chimneys vs other sites	HQ673062.1.1520	182.624	0	8	0.000428653	0.000613665	0.000380917	0.000357597	1.08186e-05	5.31474e-06	0	0	0	0	2.7478e-06	3.3597e-06	0	Bacteria;Proteobacteria;Gammaproteobacteria;Salinisphaerales;Salinisphaeraceae;ZD0417 marine group
g_test	inactive chimneys vs other sites	EF218995.1.1393	182.251	0	6	0	0	2.44178e-06	0	0.0014004	3.89748e-05	6.86277e-06	2.74797e-05	0	2.13771e-06	0	0	0	Bacteria;Proteobacteria;Epsilonproteobacteria;Nautiliales;Nautiliaceae;Nitratiruptor
g_test	inactive chimneys vs other sites	JX227497.1.1514	181.53	0	6	0.000224385	0.000746928	0.000388243	0.000319822	9.61651e-06	7.08632e-06	0	0	0	0	0	0	0	Bacteria;Acidobacteria;Acidobacteria;Subgroup 6;uncultured bacterium;uncultured bacterium;uncultured bacterium
g_test	inactive chimneys vs other sites	KF624344.1.1310	181.343	0	6	0	0	2.44178e-06	0	0.00010458	0.000903506	5.14708e-06	0	0	0.00271489	2.19824e-05	0	0	Bacteria;Proteobacteria;Epsilonproteobacteria;Campylobacterales;Helicobacteraceae;Sulfurimonas;uncultured bacterium
g_test	inactive chimneys vs other sites	New.CleanUp.ReferenceOTU164097	180.606	0	5	0.000476625	0	0.000803345	0.000212795	4.44763e-05	8.8579e-06	0	0	0	0	0	0	0	Bacteria;Proteobacteria;Gammaproteobacteria;Alteromonadales;Idiomarinaceae;Idiomarina;uncultured bacterium
g_test	inactive chimneys vs other sites	New.ReferenceOTU2248	180.197	0	5	0	0	0	0	0	5.31474e-06	0	0	0	2.13771e-06	0.000329736	0.000314132	0.000212225	Bacteria;Bacteroidetes;Cytophagia;Cytophagales;Flammeovirgaceae;Reichenbachiella;uncultured bacterium
g_test	inactive chimneys vs other sites	AM997615.1.1495	180.101	0	7	0.000372943	0.00049521	0.00048103	0.000243015	6.85176e-05	1.59442e-05	0	0	0	0	1.3739e-06	0	0	Bacteria;Planctomycetes;Planctomycetacia;Planctomycetales;Planctomycetaceae;Planctomyces
g_test	inactive chimneys vs other sites	New.ReferenceOTU1161	179.379	0	7	0	0	2.44178e-06	0	1.20206e-05	0.000428722	6.00492e-05	0	0	0.000132538	0.00119804	0	5.20552e-05	Bacteria;Proteobacteria;Gammaproteobacteria;Order Incertae Sedis;Family Incertae Sedis;Marinicella;uncultured bacterium
g_test	inactive chimneys vs other sites	HM798938.1.1494	178.45	0	6	0.000519954	0.000579116	0.000399231	0.000169984	1.44248e-05	1.77158e-06	0	0	0	0	0	0	0	Bacteria;Planctomycetes;OM190;uncultured planctomycete;uncultured planctomycete;uncultured planctomycete;uncultured planctomycete
g_test	inactive chimneys vs other sites	New.CleanUp.ReferenceOTU634501	178.243	0	5	0	0	0	0	0	1.77158e-06	0	0	0	8.55085e-06	0.000707559	1.67985e-06	2.00212e-06	Bacteria;Bacteroidetes;Flavobacteriia;Flavobacteriales;Flavobacteriaceae;Lutibacter;uncultured Bacteroidetes bacterium
g_test	inactive chimneys vs other sites	New.ReferenceOTU2074	178.125	0	4	0	0	0	0	3.60619e-06	0	0	0	0	0	1.3739e-06	1.67985e-06	0.00105312	Bacteria;Nitrospirae;Nitrospira;Nitrospirales;Nitrospiraceae;Leptospirillum;uncultured bacterium
g_test	inactive chimneys vs other sites	New.ReferenceOTU493	178.104	0	6	0.000668512	3.29043e-05	0.000609224	0.000217832	6.97197e-05	0	0	0	0	0	0	1.67985e-06	0	Bacteria;Proteobacteria;Gammaproteobacteria;Alteromonadales;Alteromonadaceae;Alteromonas
g_test	inactive chimneys vs other sites	New.ReferenceOTU516	176.755	0	6	0	0	4.63938e-05	0	4.80825e-06	5.31474e-06	0	0	0	0	2.7478e-06	1.67985e-06	0.00123531	Bacteria;Proteobacteria;Gammaproteobacteria;Chromatiales;Ectothiorhodospiraceae;Acidiferrobacter;uncultured gamma proteobacterium
g_test	inactive chimneys vs other sites	KF859546.1.1499	176.568	0	6	0.000241407	1.48069e-05	0.00121967	1.25914e-06	0	1.24011e-05	0	0	0	0	1.3739e-06	0	0	Bacteria;Proteobacteria;Gammaproteobacteria;Alteromonadales;Alteromonadaceae;Marinobacter;uncultured Marinobacter sp,
g_test	inactive chimneys vs other sites	New.ReferenceOTU1972	176.309	0	8	1.54748e-06	6.58086e-06	8.54623e-06	0	0.000127419	0.00540155	0	0	0	2.77902e-05	0.000441023	0	6.00637e-06	Bacteria;Bacteroidetes;Bacteroidia;Bacteroidales;Marinilabiaceae;uncultured;uncultured Bacteroidetes bacterium
g_test	inactive chimneys vs other sites	JN018840.1.1368	175.831	0	6	0.000382228	0.000781478	0.000216097	0.000305972	1.20206e-06	5.31474e-06	0	0	0	0	0	0	0	Bacteria;Proteobacteria;Deltaproteobacteria;SAR324 clade(Marine group B);uncultured bacterium;uncultured bacterium;uncultured bacterium
g_test	inactive chimneys vs other sites	New.CleanUp.ReferenceOTU855977	175.8	0	5	0	0	2.44178e-06	0	0.000958044	0.00065017	1.71569e-06	0	0	0	1.3739e-06	0	0	Bacteria;Proteobacteria;Epsilonproteobacteria;Campylobacterales;Helicobacteraceae;Sulfurimonas;uncultured bacterium
g_test	inactive chimneys vs other sites	DQ396344.1.1492	175.72	0	5	0	0	0	2.51829e-06	0.00190166	2.1259e-05	0	0	0	0	4.2591e-05	0	2.80297e-05	Bacteria;Proteobacteria;Alphaproteobacteria;Sphingomonadales;Sphingomonadaceae
g_test	inactive chimneys vs other sites	New.ReferenceOTU2209	175.668	0	6	0	0	0	0	7.21238e-05	0.00017893	3.43139e-06	0	6.41078e-05	0.00165673	8.3808e-05	0	0	Bacteria;Proteobacteria;Gammaproteobacteria;Thiotrichales;Thiotrichaceae;uncultured
g_test	inactive chimneys vs other sites	New.ReferenceOTU823	175.33	0	6	0	0	1.0988e-05	0	6.73155e-05	2.83453e-05	0	0	0	0	0.000251424	1.67985e-06	0.000987046	Bacteria;Proteobacteria;Gammaproteobacteria;Thiotrichales;Piscirickettsiaceae;uncultured;uncultured bacterium
g_test	inactive chimneys vs other sites	New.ReferenceOTU1510	175.184	0	8	8.6659e-05	3.29043e-06	0.0010988	6.29571e-06	0.000204351	0.000109838	0	0	0	0	2.7478e-06	1.67985e-06	0	Bacteria;Proteobacteria;Gammaproteobacteria;Alteromonadales;Idiomarinaceae;Idiomarina
g_test	inactive chimneys vs other sites	HQ672445.1.1436	175.032	0	7	0.000493647	0.000510017	0.000330861	0.000307231	1.56268e-05	8.8579e-06	0	0	0	0	1.3739e-06	0	0	Bacteria;Proteobacteria;Alphaproteobacteria;SAR11 clade;Deep 1;uncultured bacterium;uncultured bacterium
g_test	inactive chimneys vs other sites	DQ395040.1.1518	174.461	0	7	0	1.64522e-06	2.31969e-05	1.25914e-06	0.000556555	0.00293551	0	0	0	3.63411e-05	0.000157999	0	0	Bacteria;Verrucomicrobia;Verrucomicrobiae;Verrucomicrobiales;Verrucomicrobiaceae;Persicirhabdus;uncultured bacterium
g_test	inactive chimneys vs other sites	New.CleanUp.ReferenceOTU228259	174.291	0	5	0	0	2.44178e-06	0	9.61651e-06	1.77158e-06	0	3.09146e-05	0.00221773	0	0	0	0	Archaea;Nanoarchaeota;Nanoarchaeota Incertae Sedis;Unknown Order;Unknown Family;Nanoarchaeum;uncultured nanoarchaeote
g_test	inactive chimneys vs other sites	JN166362.1.1498	173.675	0	6	0.000300212	0.000732121	0.000245399	0.000356337	4.80825e-06	8.8579e-06	0	0	0	0	0	0	0	Bacteria;Proteobacteria;Gammaproteobacteria;KI89A clade;uncultured bacterium;uncultured bacterium;uncultured bacterium
g_test	inactive chimneys vs other sites	New.ReferenceOTU631	173.521	0	5	0	0	0	0	5.16887e-05	8.8579e-06	0.00143775	0.000407042	1.6027e-05	0	0	0	0	Bacteria;Proteobacteria;Epsilonproteobacteria;Campylobacterales;Campylobacteraceae;Thiofractor;uncultured bacterium
g_test	inactive chimneys vs other sites	New.ReferenceOTU1906	172.804	0	4	0	0	0	0	7.21238e-06	0	0	0	0	0	0.000116782	5.03955e-06	0.000868921	Unassigned
g_test	inactive chimneys vs other sites	New.ReferenceOTU2552	172.769	0	4	0	0	2.44178e-06	0	0	0	0	0	0	0	1.3739e-06	5.03955e-06	0.00101107	Bacteria;Proteobacteria;Gammaproteobacteria;Chromatiales;Ectothiorhodospiraceae;Thioalkalispira;uncultured bacterium
g_test	inactive chimneys vs other sites	New.ReferenceOTU870	172.505	0	5	0	0	0	0	0	0	0	0	8.01348e-06	0.000111161	0.000570169	7.8953e-05	2.00212e-06	Bacteria;Proteobacteria;Gammaproteobacteria;Chromatiales;Ectothiorhodospiraceae;Acidiferrobacter;uncultured bacterium
g_test	inactive chimneys vs other sites	DQ300561.1.1246	172.421	0	7	0.000640658	0.000394852	0.000407777	0.000180057	1.20206e-05	7.08632e-06	0	0	0	0	1.3739e-06	0	0	Archaea;Euryarchaeota;Thermoplasmata;Thermoplasmatales;Marine Group II;uncultured marine group II euryarchaeote;uncultured marine group II euryarchaeote
g_test	inactive chimneys vs other sites	New.ReferenceOTU1663	172.382	0	6	1.54748e-06	1.64522e-06	0	0	0	0.000124011	1.71569e-06	0	0	0.00138096	1.23651e-05	0	0	Unassigned
g_test	inactive chimneys vs other sites	AY531558.1.1384	171.573	0	11	0	1.64522e-06	0.00024662	1.25914e-06	0.00120447	0.000343686	0.00213089	6.69817e-05	7.41247e-05	0.000483123	3.02258e-05	1.67985e-06	0	Bacteria;Bacteroidetes;Flavobacteriia;Flavobacteriales;Flavobacteriaceae;Maritimimonas
g_test	inactive chimneys vs other sites	AM997359.1.1455	171.364	0	6	0.000437937	0.000386626	0.000463938	0.000256865	1.44248e-05	5.31474e-06	0	0	0	0	0	0	0	Bacteria;Chloroflexi;SAR202 clade;uncultured deep-sea bacterium;uncultured deep-sea bacterium;uncultured deep-sea bacterium;uncultured deep-sea bacterium
g_test	inactive chimneys vs other sites	New.CleanUp.ReferenceOTU728779	171.056	0	5	0.000354373	0.000616956	0.000319873	0.000295899	1.68289e-05	0	0	0	0	0	0	0	0	Bacteria;Proteobacteria;Deltaproteobacteria;GR-WP33-30;uncultured bacterium;uncultured bacterium;uncultured bacterium
g_test	inactive chimneys vs other sites	HM799090.1.1392	171.009	0	7	0	0	3.66267e-06	0	9.61651e-06	2.30305e-05	0	0	0	0.000215909	1.64868e-05	1.67985e-06	0.000894949	Bacteria;Proteobacteria;Alphaproteobacteria;Rhodobacterales;Rhodobacteraceae;Roseobacter clade NAC11-7 lineage;uncultured alpha proteobacterium
g_test	inactive chimneys vs other sites	HQ673503.1.1499	170.902	0	6	0.000298664	0.000837415	0.00016482	0.000338709	7.21238e-06	3.54316e-06	0	0	0	0	0	0	0	Bacteria;Proteobacteria;Gammaproteobacteria;Xanthomonadales;uncultured
g_test	inactive chimneys vs other sites	New.CleanUp.ReferenceOTU681627	170.568	0	6	0	0	1.22089e-06	0	0.000793362	0.000827328	0.000132108	0	0	8.55085e-06	2.7478e-06	0	0	Bacteria;Verrucomicrobia;Verrucomicrobiae;Verrucomicrobiales;Verrucomicrobiaceae;Persicirhabdus;uncultured bacterium
g_test	inactive chimneys vs other sites	KC002117.1.1316	169.978	0	6	0.000653037	0.000554438	1.95342e-05	0.00038152	2.76475e-05	1.24011e-05	0	0	0	0	0	0	0	Bacteria;Proteobacteria;Alphaproteobacteria;Rhodospirillales;Rhodospirillaceae;AEGEAN-169 marine group
g_test	inactive chimneys vs other sites	GU583970.1.1481	169.824	0	7	1.54748e-06	1.64522e-06	0	0	0.000209159	0.000343686	0.00104143	0.000221555	2.00337e-06	0	0	0	0	Bacteria;Proteobacteria;Epsilonproteobacteria;Campylobacterales;Helicobacteraceae;Sulfurovum;uncultured epsilon proteobacterium
g_test	inactive chimneys vs other sites	New.CleanUp.ReferenceOTU1112479	169.811	0	4	0	0	0	0	1.20206e-06	1.24011e-05	0	0	0	7.69576e-05	0.000663595	0	0	Bacteria;Proteobacteria;Gammaproteobacteria;Thiotrichales;Piscirickettsiaceae;endosymbionts;uncultured bacterium
g_test	inactive chimneys vs other sites	New.ReferenceOTU627	168.98	0	6	4.4877e-05	0.000105294	7.81369e-05	3.02194e-05	4.80825e-06	0	0	0	0	0	0	0	0.0016037	Bacteria;Planctomycetes;Planctomycetacia;Planctomycetales;Planctomycetaceae;Planctomyces
g_test	inactive chimneys vs other sites	New.ReferenceOTU2247	168.9	0	6	0.000298664	0.000585697	0.000228306	0.000449514	4.80825e-06	7.08632e-06	0	0	0	0	0	0	0	Bacteria;Acidobacteria;Acidobacteria;Subgroup 11;uncultured Acidobacteria bacterium;uncultured Acidobacteria bacterium;uncultured Acidobacteria bacterium
g_test	inactive chimneys vs other sites	GQ347107.1.1270	168.598	0	8	0.000380681	0.00076338	0.000307664	0.00027953	2.40413e-06	1.06295e-05	0	0	0	0	1.3739e-06	0	1.00106e-05	Bacteria;Proteobacteria;Alphaproteobacteria;Rhodospirillales;Rhodospirillaceae;Defluviicoccus;uncultured bacterium
g_test	inactive chimneys vs other sites	New.CleanUp.ReferenceOTU400107	168.319	0	4	0	0	0	0	0	2.83453e-05	0	0	0	3.20657e-05	0.000713055	1.67985e-06	0	Bacteria;Proteobacteria;Alphaproteobacteria;DB1-14;uncultured bacterium;uncultured bacterium;uncultured bacterium
g_test	inactive chimneys vs other sites	AB015533.1.1482	166.818	0	6	0	0	3.66267e-06	0	0.000109388	5.13758e-05	0.000262501	0	0	0.000104748	0.00117056	0	0	Bacteria;Lentisphaerae;Oligosphaeria
g_test	inactive chimneys vs other sites	HM185888.1.1371	166.709	0	6	0	0	1.22089e-06	0	3.60619e-06	0	0	1.71748e-06	1.6027e-05	0	0	0.000876882	2.00212e-06	Bacteria;Proteobacteria;Gammaproteobacteria;Enterobacteriales;Enterobacteriaceae
g_test	inactive chimneys vs other sites	AY197376.1.1522	166.429	0	6	0	0	1.22089e-06	0	6.73155e-05	9.03506e-05	3.94609e-05	0	0	2.9928e-05	0.000972723	0	0	Bacteria;Proteobacteria;Deltaproteobacteria;Desulfobacterales;Desulfobacteraceae;Desulfobacterium;uncultured proteobacterium
g_test	inactive chimneys vs other sites	New.ReferenceOTU505	166.125	0	7	0.000343541	0.000616956	0.000390685	0.000206499	2.28392e-05	7.08632e-06	0	0	0	0	0	1.67985e-06	0	Bacteria;Planctomycetes;Planctomycetacia;Planctomycetales;Planctomycetaceae
g_test	inactive chimneys vs other sites	New.CleanUp.ReferenceOTU696937	165.819	0	6	0.000396155	0.000431047	0.000388243	0.000290862	1.44248e-05	3.54316e-06	0	0	0	0	0	0	0	Bacteria;Chloroflexi;SAR202 clade;uncultured Chloroflexi bacterium;uncultured Chloroflexi bacterium;uncultured Chloroflexi bacterium;uncultured Chloroflexi bacterium
g_test	inactive chimneys vs other sites	New.ReferenceOTU2287	165.73	0	8	0	0	0	0	4.80825e-06	7.08632e-06	2.2304e-05	0	2.00337e-06	0.000643451	0.000292641	1.67985e-05	3.40361e-05	Bacteria;Proteobacteria;Alphaproteobacteria;Rhodobacterales;Rhodobacteraceae;uncultured;uncultured bacterium
g_test	inactive chimneys vs other sites	JQ611181.1.1410	165.72	0	4	0	0	0	0	8.41444e-05	5.31474e-06	0.0017929	0	0	4.27542e-06	0	0	0	Bacteria;Acidobacteria;Holophagae;Acanthopleuribacterales;Acanthopleuribacteraceae;Thermotomaculum;uncultured bacterium
g_test	inactive chimneys vs other sites	JX001134.1.1514	165.357	0	5	0.000266167	0.000623537	0.000365046	0.000282048	4.80825e-06	0	0	0	0	0	0	0	0	Bacteria;Gemmatimonadetes;Gemmatimonadetes;BD2-11 terrestrial group
g_test	inactive chimneys vs other sites	New.ReferenceOTU2383	165.23	0	4	0	0	0	0	0	1.77158e-06	6.86277e-06	0	0	0.000491674	0.000366832	0	0	Unassigned
g_test	inactive chimneys vs other sites	New.CleanUp.ReferenceOTU135879	165.09	0	4	0	0	0	0	0	1.77158e-06	0	0	0	4.27542e-06	0.000631995	0	4.20446e-05	Bacteria;Planctomycetes;OM190;uncultured bacterium;uncultured bacterium;uncultured bacterium;uncultured bacterium
g_test	inactive chimneys vs other sites	New.ReferenceOTU2307	164.446	0	9	0	1.64522e-06	8.30205e-05	0	0.000332972	0.000373803	8.40689e-05	0.000724776	0.00034458	4.27542e-06	9.61731e-06	0	0	Bacteria;Proteobacteria;Epsilonproteobacteria;Nautiliales;Nautiliaceae;Nitratifractor
g_test	inactive chimneys vs other sites	New.ReferenceOTU754	163.518	0	7	0	0	0	0	5.28908e-05	3.72032e-05	1.71569e-06	0	6.01011e-06	0.000850809	0.000305006	0	2.00212e-06	Bacteria;Proteobacteria;Gammaproteobacteria;Thiotrichales;Thiotrichaceae;uncultured;uncultured bacterium
g_test	inactive chimneys vs other sites	New.CleanUp.ReferenceOTU707603	163.201	0	6	0	0	6.95907e-05	0	0.000133429	3.366e-05	8.23532e-05	0.00109919	0.000378637	0	0	0	0	Bacteria;Proteobacteria;Epsilonproteobacteria;Nautiliales;Nautiliaceae;Nitratifractor;uncultured bacterium
g_test	inactive chimneys vs other sites	New.CleanUp.ReferenceOTU612942	162.913	0	4	0	0	0	0	0	1.77158e-06	0	0	3.60607e-05	0	0.000713055	0	1.40149e-05	Bacteria;Proteobacteria;Gammaproteobacteria;Thiotrichales;Piscirickettsiaceae;Marine Methylotrophic Group 3
g_test	inactive chimneys vs other sites	New.ReferenceOTU2055	161.364	0	7	0.000444127	0.00045408	0.000358941	0.000244274	1.9233e-05	1.06295e-05	0	0	0	0	0	0	2.00212e-06	Bacteria;Chloroflexi;SAR202 clade;uncultured Chloroflexus sp,;uncultured Chloroflexus sp,;uncultured Chloroflexus sp,;uncultured Chloroflexus sp,
g_test	inactive chimneys vs other sites	GU567971.38985.40466	161.198	0	6	0.000366753	0.000544566	0.0003565	0.000211536	1.9233e-05	1.24011e-05	0	0	0	0	0	0	0	Bacteria;Planctomycetes;Planctomycetacia;Planctomycetales;Planctomycetaceae;uncultured
g_test	inactive chimneys vs other sites	New.ReferenceOTU2013	161.127	0	5	0	0	4.88356e-06	0	0.0011047	0.000286996	5.14708e-06	0	0	4.27542e-06	0	0	0	Bacteria;Tenericutes;Mollicutes;Mycoplasmatales;Mycoplasmataceae;Mycoplasma;uncultured bacterium
g_test	inactive chimneys vs other sites	New.ReferenceOTU687	161.044	0	6	0	0	1.70925e-05	0	8.89527e-05	3.54316e-05	0.00147206	0.000125376	2.20371e-05	0	0	0	0	Bacteria;Proteobacteria;Epsilonproteobacteria;Nautiliales;Nautiliaceae;Nitratifractor;uncultured epsilon proteobacterium
g_test	inactive chimneys vs other sites	KF465246.1.1307	160.252	0	7	0	0	2.56387e-05	0	0.00019233	0.00158734	0.000104657	1.71748e-05	2.00337e-06	1.4964e-05	0	0	0	Bacteria;Proteobacteria;Epsilonproteobacteria;Campylobacterales;Helicobacteraceae;Sulfurovum;uncultured bacterium
g_test	inactive chimneys vs other sites	New.ReferenceOTU540	159.504	0	5	0	0	8.54623e-06	1.25914e-06	0.00118283	3.72032e-05	4.63237e-05	0	0	0	0	0	0	Bacteria;Proteobacteria;Epsilonproteobacteria;Nautiliales;Nautiliaceae;Lebetimonas
g_test	inactive chimneys vs other sites	HQ153866.1.1384	159.472	0	9	0	1.64522e-06	1.22089e-05	0	0.000474815	0.000783038	0.00022304	0.000212967	8.01348e-06	6.41313e-06	1.3739e-06	0	0	Bacteria;Proteobacteria;Epsilonproteobacteria;Campylobacterales;Helicobacteraceae;Sulfurovum;uncultured bacterium
g_test	inactive chimneys vs other sites	New.CleanUp.ReferenceOTU492746	158.888	0	4	1.54748e-06	0.00169457	4.88356e-06	0	1.20206e-06	0	0	0	0	0	0	0	0	Bacteria;Bacteroidetes;Flavobacteriia;Flavobacteriales;Flavobacteriaceae;Sufflavibacter
g_test	inactive chimneys vs other sites	New.ReferenceOTU1467	158.342	0	8	0	1.64522e-06	1.22089e-06	0	0.000264454	0.00324376	0.000104657	8.58739e-06	0	6.41313e-05	0.000167616	0	0	Bacteria;Bacteroidetes;Flavobacteriia;Flavobacteriales;Flavobacteriaceae;uncultured;uncultured Bacteroidetes bacterium
g_test	inactive chimneys vs other sites	New.ReferenceOTU2265	157.999	0	7	0	0	3.66267e-06	0	0.000863081	2.30305e-05	6.86277e-06	0	0.000769294	8.55085e-06	2.7478e-06	0	0	Bacteria;Proteobacteria;Epsilonproteobacteria;Nautiliales;Nautiliaceae;Nitratifractor;uncultured bacterium
g_test	inactive chimneys vs other sites	EU287152.1.1503	157.822	0	4	0	0	0	0	0	1.77158e-06	0	0	0	0	5.49561e-06	1.67985e-06	0.00091497	Bacteria;Planctomycetes;vadinHA49;uncultured bacterium;uncultured bacterium;uncultured bacterium;uncultured bacterium
g_test	inactive chimneys vs other sites	EU650236.1.1368	157.193	0	6	0.000492099	0.000409659	0.000285688	0.00026442	7.21238e-06	1.41726e-05	0	0	0	0	0	0	0	Archaea;Thaumarchaeota;Marine Benthic Group A;uncultured archaeon;uncultured archaeon;uncultured archaeon;uncultured archaeon
g_test	inactive chimneys vs other sites	New.CleanUp.ReferenceOTU348135	157.065	0	6	0.000309496	3.29043e-06	0.000896133	0.000127173	9.61651e-06	0	0	0	0	0	0	0	2.00212e-06	Bacteria;Proteobacteria;Gammaproteobacteria;Alteromonadales;Alteromonadaceae;Alteromonas
g_test	inactive chimneys vs other sites	New.ReferenceOTU2434	156.957	0	5	0	0	0	0	9.61651e-06	0	0.000176716	0	0.00264645	6.41313e-06	5.22083e-05	0	0	Bacteria;Chloroflexi;Anaerolineae;Anaerolineales;Anaerolineaceae;uncultured;uncultured organism
g_test	inactive chimneys vs other sites	New.ReferenceOTU2017	156.341	0	8	0	0	1.83133e-05	0	2.52433e-05	0.000255107	1.02942e-05	3.43496e-06	0	0.000136814	0.000956236	0	4.00424e-06	Bacteria;Proteobacteria;Gammaproteobacteria;Order Incertae Sedis;Family Incertae Sedis;Marinicella;uncultured bacterium
g_test	inactive chimneys vs other sites	FJ666198.1.1231	156.269	0	4	0	3.29043e-06	6.83698e-05	0	0.00115398	1.77158e-06	0	0	0	0	0	0	0	Bacteria;Proteobacteria;Gammaproteobacteria;Alteromonadales;Alteromonadaceae;Spongiibacter
g_test	inactive chimneys vs other sites	New.ReferenceOTU1059	154.523	0	6	0	0	4.88356e-05	0	0.00011059	0.000263965	5.14708e-06	0	0	0.00165886	0.000123651	0	0	Bacteria;Candidate division OD1;uncultured bacterium;uncultured bacterium;uncultured bacterium;uncultured bacterium;uncultured bacterium
g_test	inactive chimneys vs other sites	New.ReferenceOTU54	154.421	0	6	0.000532334	0.000250073	0.000389464	0.00022035	1.56268e-05	7.08632e-06	0	0	0	0	0	0	0	Bacteria;Proteobacteria;Deltaproteobacteria;SAR324 clade(Marine group B);uncultured bacterium;uncultured bacterium;uncultured bacterium
g_test	inactive chimneys vs other sites	New.CleanUp.ReferenceOTU417463	154.148	0	5	1.54748e-06	0	0	0	2.40413e-06	3.54316e-06	0	0	0.00204544	0	0	1.67985e-06	0	Unassigned
g_test	inactive chimneys vs other sites	New.CleanUp.ReferenceOTU39372	154.046	0	7	0	1.64522e-06	1.46507e-05	0	3.60619e-06	7.08632e-06	0	0	0	7.26822e-05	0.000571543	0	0.00010411	Bacteria;Bacteroidetes;Flavobacteriia;Flavobacteriales;Cryomorphaceae;Crocinitomix;uncultured bacterium
g_test	inactive chimneys vs other sites	New.CleanUp.ReferenceOTU57263	153.497	0	6	0.000280094	0.00061202	0.000340628	0.00020524	2.40413e-06	7.08632e-06	0	0	0	0	0	0	0	Bacteria;Proteobacteria;Deltaproteobacteria;Sh765B-TzT-29;uncultured delta proteobacterium;uncultured delta proteobacterium;uncultured delta proteobacterium
g_test	inactive chimneys vs other sites	AB476246.1.1424	153.477	0	6	0	0	3.66267e-06	2.51829e-06	0.000478421	0.000363174	0	0	0	7.69576e-05	0.00157037	0	0	Bacteria;Proteobacteria;Gammaproteobacteria;Thiotrichales;Thiotrichaceae;Thiothrix;uncultured bacterium
g_test	inactive chimneys vs other sites	New.CleanUp.ReferenceOTU204119	153.189	0	6	0.00018415	0.000965742	0.000183133	0.00016117	8.41444e-06	1.41726e-05	0	0	0	0	0	0	0	Bacteria;Planctomycetes;Planctomycetacia;Planctomycetales;Planctomycetaceae;Rhodopirellula
g_test	inactive chimneys vs other sites	New.CleanUp.ReferenceOTU209207	153.014	0	5	0	0	4.51729e-05	0	0.00112754	8.32642e-05	2.2304e-05	0	0	0	0	3.3597e-06	0	Bacteria;Proteobacteria;Epsilonproteobacteria;Nautiliales;Nautiliaceae;Caminibacter;uncultured bacterium
g_test	inactive chimneys vs other sites	New.ReferenceOTU1108	152.856	0	4	0	0	0	0	0	1.77158e-05	0	0	0.00215963	1.06886e-05	1.3739e-06	0	0	Bacteria;Aquificae;Aquificae;Aquificales;Desulfurobacteriaceae
g_test	inactive chimneys vs other sites	EU375161.1.1213	152.152	0	7	0.000324971	4.93565e-06	3.66267e-05	0.000400407	0.000465198	0.000115153	0	0	0	0	1.3739e-06	0	0	Bacteria;Proteobacteria;Gammaproteobacteria;Alteromonadales;Pseudoalteromonadaceae;Pseudoalteromonas
g_test	inactive chimneys vs other sites	KC682629.1.1502	151.847	0	8	3.09496e-06	3.29043e-06	3.66267e-06	0	2.04351e-05	3.18884e-05	0	0	0	7.69576e-05	0.000623751	0	9.8104e-05	Bacteria;Planctomycetes;Planctomycetacia;Planctomycetales;Planctomycetaceae;Bythopirellula;uncultured bacterium
g_test	inactive chimneys vs other sites	New.CleanUp.ReferenceOTU986809	151.729	0	8	0	0	7.32534e-06	1.25914e-06	0.000936407	0.000566905	0.000104657	8.2439e-05	0	0	2.47302e-05	1.67985e-06	0	Bacteria;Proteobacteria;Epsilonproteobacteria;Campylobacterales;Helicobacteraceae;Sulfurimonas;uncultured bacterium
g_test	inactive chimneys vs other sites	New.ReferenceOTU2108	151.1	0	5	0	0	3.66267e-06	0	0	1.77158e-05	0	9.44613e-05	0.00211155	2.13771e-05	0	0	0	Bacteria;Aquificae;Aquificae;Aquificales;Desulfurobacteriaceae;Desulfurobacterium
g_test	inactive chimneys vs other sites	HM798927.1.1439	150.617	0	7	0.0006453	0.000149715	0.00049446	7.80669e-05	3.24557e-05	1.77158e-06	0	0	0	0	0	1.67985e-06	0	Bacteria;Proteobacteria;Alphaproteobacteria;Rhodospirillales;Rhodospirillaceae;uncultured;uncultured alpha proteobacterium
g_test	inactive chimneys vs other sites	New.CleanUp.ReferenceOTU754876	149.849	0	5	0	0	0	0	5.16887e-05	1.24011e-05	0.00158358	4.2937e-05	0	2.13771e-06	0	0	0	Bacteria;Proteobacteria;Epsilonproteobacteria;Campylobacterales;Campylobacteraceae;Thiofractor;uncultured bacterium
g_test	inactive chimneys vs other sites	New.ReferenceOTU224	149.74	0	5	0	0	0	0	0	1.24011e-05	1.71569e-06	0	0.00209753	8.55085e-06	1.3739e-06	0	0	Bacteria;Aquificae;Aquificae;Aquificales;Desulfurobacteriaceae
g_test	inactive chimneys vs other sites	HQ674084.1.1465	149.646	0	6	0.000266167	0.000621892	0.000275921	0.00022035	2.52433e-05	7.08632e-06	0	0	0	0	0	0	0	Bacteria;Proteobacteria;Alphaproteobacteria;Rhodospirillales;Rhodospirillaceae;uncultured;uncultured bacterium
g_test	inactive chimneys vs other sites	AF449231.1.1429	149.434	0	8	0	0	2.68596e-05	0	0.000533716	0.00085213	0.000312256	1.88923e-05	4.00674e-06	2.56525e-05	0	1.67985e-06	0	Bacteria;Proteobacteria;Epsilonproteobacteria;Campylobacterales;Helicobacteraceae;Sulfurovum;uncultured bacterium
g_test	inactive chimneys vs other sites	GQ351235.1.1469	149.338	0	4	0.000224385	0.000697571	0.00028813	0.000212795	0	0	0	0	0	0	0	0	0	Bacteria;Planctomycetes;OM190;uncultured bacterium;uncultured bacterium;uncultured bacterium;uncultured bacterium
g_test	inactive chimneys vs other sites	AY704382.1.1437	149.03	0	6	0.000379133	0.000380045	0.000422428	0.00017628	4.80825e-06	1.06295e-05	0	0	0	0	0	0	0	Archaea;Euryarchaeota;Thermoplasmata;Thermoplasmatales;Marine Group III
g_test	inactive chimneys vs other sites	New.ReferenceOTU2148	148.876	0	4	0	3.29043e-06	6.10445e-06	0	6.01032e-05	0.00161922	0	0	0	0	0	0	0	Bacteria;BD1-5;uncultured bacterium;uncultured bacterium;uncultured bacterium;uncultured bacterium;uncultured bacterium
g_test	inactive chimneys vs other sites	JN662112.1.1361	148.577	0	7	1.54748e-06	0	0	0	0.000528908	5.66905e-05	0.000909317	3.43496e-06	2.00337e-06	4.27542e-06	0	0	0	Bacteria;Proteobacteria;Epsilonproteobacteria;Campylobacterales;Helicobacteraceae;Sulfurovum;uncultured bacterium
g_test	inactive chimneys vs other sites	EU491708.1.1446	148.449	0	4	0	0	0	0	0	3.18884e-05	0	0	0	2.13771e-06	4.2591e-05	0	0.000898953	Bacteria;Bacteroidetes;Cytophagia;Cytophagales;Flammeovirgaceae;uncultured;uncultured bacterium
g_test	inactive chimneys vs other sites	New.CleanUp.ReferenceOTU474543	147.822	0	7	0	0	0	0	1.68289e-05	3.54316e-06	0.00186153	3.26321e-05	2.00337e-06	1.28263e-05	8.24341e-06	0	0	Bacteria;Proteobacteria;Epsilonproteobacteria;Campylobacterales;Helicobacteraceae;Sulfurovum;uncultured bacterium
g_test	inactive chimneys vs other sites	AM162581.1.1317	147.239	0	5	2.78547e-05	0	0.00108293	0	7.93362e-05	1.77158e-05	0	0	0	0	0	1.67985e-06	0	Bacteria;Proteobacteria;Alphaproteobacteria;Rhodobacterales;Rhodobacteraceae;Ruegeria
g_test	inactive chimneys vs other sites	New.ReferenceOTU934	146.675	0	9	7.73741e-06	1.64522e-06	0	0	1.9233e-05	0.00908112	0	1.71748e-06	2.60438e-05	0.00137455	0.000398432	8.39925e-06	0	Bacteria;Proteobacteria;Zetaproteobacteria;Mariprofundales;Mariprofundaceae;Mariprofundus;uncultured bacterium
g_test	inactive chimneys vs other sites	HQ674085.1.1512	146.103	0	6	0.000332709	0.000417885	0.000300339	0.000289603	2.40413e-06	1.06295e-05	0	0	0	0	0	0	0	Bacteria;Deferribacteres;Deferribacteres;Deferribacterales;SAR406 clade(Marine group A);uncultured bacterium;uncultured bacterium
g_test	inactive chimneys vs other sites	HQ673994.1.1476	146.103	0	6	0.000416273	0.000279687	0.000368709	0.000259383	6.01032e-06	1.77158e-06	0	0	0	0	0	0	0	Bacteria;Proteobacteria;Deltaproteobacteria;SAR324 clade(Marine group B);uncultured bacterium;uncultured bacterium;uncultured bacterium
g_test	inactive chimneys vs other sites	AB278143.1.1549	145.858	0	7	0	0	2.44178e-06	0	0.00113715	2.30305e-05	6.86277e-06	1.03049e-05	2.00337e-06	0	0	1.67985e-06	0	Bacteria;Aquificae;Aquificae;Aquificales;Desulfurobacteriaceae;Balnearium
g_test	inactive chimneys vs other sites	New.ReferenceOTU2423	145.641	0	4	0	0	0	0	5.89011e-05	1.77158e-06	0.00147378	7.04166e-05	0	0	0	0	0	Bacteria;Proteobacteria;Epsilonproteobacteria;Campylobacterales;Helicobacteraceae;Sulfurovum;uncultured bacterium
g_test	inactive chimneys vs other sites	HQ672486.1.1447	145.641	0	6	0.000318781	0.000383335	0.000294234	0.000327377	7.21238e-06	7.08632e-06	0	0	0	0	0	0	0	Bacteria;Proteobacteria;Alphaproteobacteria;SAR11 clade;Surface 1
g_test	inactive chimneys vs other sites	New.ReferenceOTU1488	145.592	0	6	0	0	0	0	4.80825e-06	8.8579e-06	0	0	0	8.55085e-06	0.000579787	1.67985e-06	4.80509e-05	Bacteria;Proteobacteria;Alphaproteobacteria;DB1-14;uncultured bacterium;uncultured bacterium;uncultured bacterium
g_test	inactive chimneys vs other sites	JX125447.1.1454	145.447	0	5	0	0	1.22089e-06	0	4.80825e-06	0	0.000121814	0.00180163	0	2.9928e-05	0	0	0	Bacteria;Proteobacteria;Epsilonproteobacteria;Campylobacterales;Helicobacteraceae;Sulfurimonas;uncultured bacterium
g_test	inactive chimneys vs other sites	AF119126.1.1386	145.406	0	7	6.18993e-06	1.64522e-06	1.0988e-05	1.51097e-05	1.20206e-06	0	0	0	0	0	6.86951e-06	0	0.000973031	Archaea;Thaumarchaeota;Marine Group I;Unknown Order;Unknown Family;Candidatus Nitrosopumilus
g_test	inactive chimneys vs other sites	New.ReferenceOTU571	145.363	0	7	0.000988841	0.000143134	0.000214877	2.39237e-05	6.37094e-05	1.94874e-05	0	0	0	0	0	3.3597e-06	0	Bacteria;Proteobacteria;Gammaproteobacteria;Oceanospirillales;Halomonadaceae;Halomonas
g_test	inactive chimneys vs other sites	New.ReferenceOTU771	144.91	0	6	4.64245e-06	0	3.66267e-06	0	2.40413e-06	0	0	0	1.00168e-05	0	0	0.000769372	2.00212e-06	Bacteria;Proteobacteria;Gammaproteobacteria;Enterobacteriales;Enterobacteriaceae;Escherichia-Shigella
g_test	inactive chimneys vs other sites	FR853052.1.1462	144.871	0	6	0	0	3.41849e-05	0	0.000852263	6.732e-05	1.20098e-05	0.000266209	1.6027e-05	0	0	0	0	Bacteria;Proteobacteria;Epsilonproteobacteria;Campylobacterales;Campylobacteraceae;Campylobacter;uncultured epsilon proteobacterium
g_test	inactive chimneys vs other sites	FJ905710.1.1379	144.871	0	4	0	0	1.58716e-05	0	0.00111431	0	0	5.15243e-06	4.00674e-06	0	0	0	0	Bacteria;Proteobacteria;Epsilonproteobacteria;Nautiliales;Nautiliaceae;Lebetimonas;uncultured bacterium
g_test	inactive chimneys vs other sites	JN018921.1.1369	144.717	0	6	0.000374491	0.0003784	0.000234411	0.000327377	2.16371e-05	3.54316e-06	0	0	0	0	0	0	0	Bacteria;Chloroflexi;SAR202 clade;uncultured Chloroflexi bacterium;uncultured Chloroflexi bacterium;uncultured Chloroflexi bacterium;uncultured Chloroflexi bacterium
g_test	inactive chimneys vs other sites	AF419687.1.1481	144.338	0	6	0	1.64522e-06	0	0	7.21238e-05	0.00248553	5.14708e-06	0	0	2.35148e-05	6.59473e-05	0	0	Bacteria;Bacteroidetes;VC2,1 Bac22;uncultured bacterium;uncultured bacterium;uncultured bacterium;uncultured bacterium
g_test	inactive chimneys vs other sites	JQ712443.1.1378	143.331	0	4	0	0	3.54058e-05	0	2.40413e-05	0.000788353	0	0	0.000883486	0	0	0	0	Bacteria;Proteobacteria;Epsilonproteobacteria;Campylobacterales;Campylobacteraceae;Campylobacter;uncultured epsilon proteobacterium
g_test	inactive chimneys vs other sites	JQ712470.1.1325	142.464	0	5	0	0	7.32534e-06	0	0.000938811	0.000382661	0	6.86991e-06	0	1.06886e-05	0	0	0	Bacteria;Proteobacteria;Epsilonproteobacteria;Campylobacterales;Helicobacteraceae;Sulfurimonas;uncultured epsilon proteobacterium
g_test	inactive chimneys vs other sites	New.CleanUp.ReferenceOTU166031	142.099	0	5	0	0	3.66267e-06	0	0.000131025	0	0.00136398	3.26321e-05	2.00337e-06	0	0	0	0	Unassigned
g_test	inactive chimneys vs other sites	HQ673877.1.1507	142.099	0	6	0.000324971	0.000406368	0.0002747	0.000305972	1.20206e-06	1.77158e-06	0	0	0	0	0	0	0	Bacteria;Deferribacteres;Deferribacteres;Deferribacterales;SAR406 clade(Marine group A);uncultured bacterium;uncultured bacterium
g_test	inactive chimneys vs other sites	New.ReferenceOTU927	142.021	0	7	0.000329614	0.000442563	0.000297897	0.000255606	1.56268e-05	8.8579e-06	0	0	0	0	0	0	2.00212e-06	Unassigned
g_test	inactive chimneys vs other sites	HQ674538.1.1512	141.944	0	5	0.000242955	0.000380045	0.000400452	0.000256865	7.21238e-06	0	0	0	0	0	0	0	0	Bacteria;Acidobacteria;Acidobacteria;Subgroup 6;uncultured bacterium;uncultured bacterium;uncultured bacterium
g_test	inactive chimneys vs other sites	DQ300527.1.1290	141.944	0	6	0.000485909	0.000309301	0.000283246	0.000212795	2.40413e-05	5.31474e-06	0	0	0	0	0	0	0	Archaea;Thaumarchaeota;Marine Benthic Group A
g_test	inactive chimneys vs other sites	New.CleanUp.ReferenceOTU1112441	141.867	0	7	0	0	3.66267e-06	1.25914e-06	0.000483229	0.000797211	0.000142402	1.20223e-05	0	2.13771e-06	0	0	0	Bacteria;Proteobacteria;Epsilonproteobacteria;Campylobacterales;Campylobacteraceae;Arcobacter
g_test	inactive chimneys vs other sites	AB189374.1.1478	141.406	0	6	0	0	8.54623e-06	0	0.00105301	0.000249793	0	0	0	2.13771e-06	6.86951e-06	1.67985e-06	0	Bacteria;Proteobacteria;Epsilonproteobacteria;Campylobacterales;Campylobacteraceae;Arcobacter;uncultured epsilon proteobacterium
g_test	inactive chimneys vs other sites	JN662053.1.1380	140.966	0	6	0	0	3.05222e-05	0	0.000877506	0.000701546	1.37255e-05	0	0	3.63411e-05	5.49561e-06	0	0	Bacteria;Bacteroidetes;Flavobacteriia;Flavobacteriales;Flavobacteriaceae;uncultured;uncultured Bacteroidetes bacterium
g_test	inactive chimneys vs other sites	New.ReferenceOTU508	140.947	0	5	0	0	2.44178e-06	0	1.08186e-05	1.41726e-05	0	0	0	0	0.000273406	0	0.000524556	Unassigned
g_test	inactive chimneys vs other sites	HQ673742.1.1447	140.712	0	6	0.000264619	0.000567599	0.000148949	0.000328636	1.20206e-05	1.59442e-05	0	0	0	0	0	0	0	Bacteria;Proteobacteria;Alphaproteobacteria;Rhodospirillales;Rhodospirillaceae;AEGEAN-169 marine group
g_test	inactive chimneys vs other sites	JN166286.1.1514	140.25	0	6	0.000287832	0.000613665	0.00017825	0.000256865	3.60619e-06	5.31474e-06	0	0	0	0	0	0	0	Bacteria;Acidobacteria;Acidobacteria;Subgroup 6
g_test	inactive chimneys vs other sites	HQ673812.1.1447	140.096	0	6	0.0002151	0.000376754	0.000322315	0.000333673	9.61651e-06	1.59442e-05	0	0	0	0	0	0	0	Bacteria;Proteobacteria;Alphaproteobacteria;OCS116 clade;uncultured bacterium;uncultured bacterium;uncultured bacterium
g_test	inactive chimneys vs other sites	New.CleanUp.ReferenceOTU747006	139.942	0	5	0.000242955	0.000529759	0.000322315	0.000211536	0	3.54316e-06	0	0	0	0	0	0	0	Bacteria;Acidobacteria;Acidobacteria;Subgroup 6;uncultured bacterium;uncultured bacterium;uncultured bacterium
g_test	inactive chimneys vs other sites	HQ674261.1.1518	139.48	0	6	0.000150106	0.000635053	0.000175808	0.000350042	2.40413e-06	5.31474e-06	0	0	0	0	0	0	0	Bacteria;Proteobacteria;Gammaproteobacteria;E01-9C-26 marine group;uncultured bacterium;uncultured bacterium;uncultured bacterium
g_test	inactive chimneys vs other sites	JF320737.1.1450	139.245	0	5	1.54748e-06	0	9.76712e-06	0	0.000106984	0.00150053	0	0	0	4.27542e-06	0	0	0	Bacteria;Proteobacteria;Epsilonproteobacteria;Campylobacterales;Hydrogenimonaceae;Hydrogenimonas
g_test	inactive chimneys vs other sites	FN562851.1.1351	139.145	0	8	0	0	2.1976e-05	0	0.000183916	0.000194874	0.000547306	0.00103392	6.01011e-06	5.77182e-05	0	1.67985e-06	0	Bacteria;Proteobacteria;Epsilonproteobacteria;Campylobacterales;Helicobacteraceae;Sulfurovum;uncultured bacterium
g_test	inactive chimneys vs other sites	JQ287275.1.1427	139.136	0	4	0	0	0	0	1.20206e-06	0	0	0	0	0	1.3739e-06	3.3597e-06	0.00081086	Bacteria;Proteobacteria;Alphaproteobacteria;Rhodobacterales;Rhodobacteraceae;Roseobacter clade NAC11-7 lineage;uncultured bacterium
g_test	inactive chimneys vs other sites	New.CleanUp.ReferenceOTU438995	139.099	0	5	0	0	0	0	4.80825e-06	3.366e-05	0	0	0	7.26822e-05	0.000322867	0	0.000390414	Bacteria;Proteobacteria;Deltaproteobacteria;Myxococcales;Haliangiaceae;Haliangium;uncultured bacterium
g_test	inactive chimneys vs other sites	New.ReferenceOTU666	139.095	0	4	0	0	0	0	6.01032e-06	0	6.86277e-06	0	0	2.77902e-05	0.000575665	0	0	Bacteria;Proteobacteria;Gammaproteobacteria;Thiotrichales;Piscirickettsiaceae;Thiomicrospira;uncultured gamma proteobacterium
g_test	inactive chimneys vs other sites	HQ673340.1.1525	138.71	0	6	0.000368301	0.000449144	0.000256387	0.000217832	1.20206e-05	0	0	0	2.00337e-06	0	0	0	0	Bacteria;Deferribacteres;Deferribacteres;Deferribacterales;SAR406 clade(Marine group A)
g_test	inactive chimneys vs other sites	New.ReferenceOTU1582	138.556	0	6	0.000235217	0.00041624	0.000313769	0.000275752	2.04351e-05	1.06295e-05	0	0	0	0	0	0	0	Bacteria;Acidobacteria;Acidobacteria;Subgroup 6;uncultured bacterium;uncultured bacterium;uncultured bacterium
g_test	inactive chimneys vs other sites	New.CleanUp.ReferenceOTU280060	138.392	0	4	0	0	3.66267e-06	0	0	3.54316e-06	0	0	0	2.13771e-05	0.000561926	0	0	Bacteria;Proteobacteria;Alphaproteobacteria;Rhizobiales;Hyphomicrobiaceae;uncultured;uncultured bacterium
g_test	inactive chimneys vs other sites	JQ611102.1.1398	137.827	0	9	0	0	0.000449287	2.51829e-06	0.00105902	0.00276366	0.000626228	0.000212967	2.00337e-06	0.000713996	0.000174486	0	0	Bacteria;Bacteroidetes;Flavobacteriia;Flavobacteriales;Flavobacteriaceae;Lutibacter;uncultured bacterium
g_test	inactive chimneys vs other sites	JQ612260.1.1498	137.416	0	7	0.000102134	0.000774897	0.000122089	0.000345005	4.80825e-06	3.54316e-06	0	0	0	0	0	1.67985e-06	0	Bacteria;Acidobacteria;Acidobacteria;Subgroup 21;uncultured bacterium;uncultured bacterium;uncultured bacterium
g_test	inactive chimneys vs other sites	KC294853.1.1460	137.016	0	6	0.000292474	1.31617e-05	0.000264933	0.00033745	0.000218776	5.31474e-05	0	0	0	0	0	0	0	Bacteria;Proteobacteria;Gammaproteobacteria;Alteromonadales;Alteromonadaceae;Alteromonas
g_test	inactive chimneys vs other sites	New.CleanUp.ReferenceOTU501636	136.342	0	6	0.000137726	0.000890062	8.7904e-05	0.000254347	7.21238e-06	0	0	0	0	0	0	1.67985e-06	0	Bacteria;Proteobacteria;Deltaproteobacteria;Sh765B-TzT-29;uncultured bacterium;uncultured bacterium;uncultured bacterium
g_test	inactive chimneys vs other sites	HQ674501.1.1524	136.245	0	6	0.000102134	0.000715669	9.76712e-05	0.000377743	1.20206e-06	1.24011e-05	0	0	0	0	0	0	0	Bacteria;Gemmatimonadetes;Gemmatimonadetes;BD2-11 terrestrial group;uncultured bacterium;uncultured bacterium;uncultured bacterium
g_test	inactive chimneys vs other sites	EF597694.1.1449	136.091	0	6	7.58266e-05	0.000745283	7.44743e-05	0.000400407	4.80825e-06	5.31474e-06	0	0	0	0	0	0	0	Bacteria;Acidobacteria;Acidobacteria;Subgroup 6;uncultured bacterium;uncultured bacterium;uncultured bacterium
g_test	inactive chimneys vs other sites	New.CleanUp.ReferenceOTU192371	135.498	0	7	0	0	0	0	0.000299314	0.000164757	0.000960788	9.96137e-05	2.00337e-06	8.55085e-06	1.3739e-06	0	0	Bacteria;Proteobacteria;Epsilonproteobacteria;Campylobacterales;Helicobacteraceae;Sulfurovum;uncultured bacterium
g_test	inactive chimneys vs other sites	KF771510.1.1499	135.358	0	8	0.000312591	0.000467241	0.000339407	0.000181317	2.04351e-05	1.59442e-05	0	0	0	0	2.7478e-06	0	2.00212e-06	Bacteria;Planctomycetes;Planctomycetacia;Planctomycetales;Planctomycetaceae;Rhodopirellula;uncultured bacterium
g_test	inactive chimneys vs other sites	New.ReferenceOTU1506	135.167	0	5	0.000312591	0.000429401	0.000249061	0.00026442	6.01032e-06	0	0	0	0	0	0	0	0	Bacteria;Proteobacteria;SPOTSOCT00m83;uncultured bacterium;uncultured bacterium;uncultured bacterium;uncultured bacterium
g_test	inactive chimneys vs other sites	HQ674392.1.1465	135.013	0	6	0.000276999	0.00057089	0.000235632	0.00019139	7.21238e-06	7.08632e-06	0	0	0	0	0	0	0	Bacteria;Proteobacteria;SPOTSOCT00m83;uncultured bacterium;uncultured bacterium;uncultured bacterium;uncultured bacterium
g_test	inactive chimneys vs other sites	New.CleanUp.ReferenceOTU687310	134.81	0	8	0.000354373	0.000427756	0.000295455	0.000210277	1.44248e-05	1.06295e-05	0	0	0	0	1.3739e-06	1.67985e-06	0	Bacteria;Planctomycetes;Planctomycetacia;Planctomycetales;Planctomycetaceae;Rhodopirellula
g_test	inactive chimneys vs other sites	FR853007.1.1516	134.204	0	9	4.64245e-06	0	0.00012331	0	0.000704409	0.000317113	0.000428923	5.15243e-06	4.80809e-05	2.77902e-05	1.64868e-05	0	0	Bacteria;Proteobacteria;Deltaproteobacteria;Desulfobacterales;Desulfobulbaceae;Desulfobulbus;uncultured delta proteobacterium
g_test	inactive chimneys vs other sites	New.CleanUp.ReferenceOTU92057	134.067	0	6	0	0	0	0	1.20206e-06	1.77158e-06	0	0	0	2.13771e-06	0.000527578	1.67985e-06	2.20233e-05	Bacteria;Bacteroidetes;Flavobacteriia;Flavobacteriales;Flavobacteriaceae
g_test	inactive chimneys vs other sites	GQ377761.1.1252	133.935	0	6	0.000270809	2.3033e-05	8.05787e-05	5.41431e-05	0.000657529	5.13758e-05	0	0	0	0	0	0	0	Bacteria;Proteobacteria;Gammaproteobacteria;Alteromonadales;Alteromonadaceae;Marinobacter;uncultured Marinobacter sp,
g_test	inactive chimneys vs other sites	DQ513105.1.1481	133.887	0	7	0.000201173	0.000595568	0.00021976	0.000261902	7.21238e-06	1.41726e-05	0	0	0	0	0	0	2.00212e-06	Bacteria;Planctomycetes;OM190
g_test	inactive chimneys vs other sites	New.CleanUp.ReferenceOTU451772	133.119	0	7	0.000131536	0.000704152	0.00026127	0.00013221	2.04351e-05	7.08632e-05	0	0	0	0	0	1.67985e-06	0	Bacteria;Proteobacteria;Gammaproteobacteria;Oceanospirillales;Alcanivoracaceae;Alcanivorax
g_test	inactive chimneys vs other sites	HQ673990.1.1462	133.119	0	7	0.000382228	0.00042282	0.000250282	0.000197685	2.04351e-05	1.06295e-05	0	0	0	0	0	1.67985e-06	0	Bacteria;Proteobacteria;Alphaproteobacteria;Rhodospirillales;Rhodospirillaceae;uncultured
g_test	inactive chimneys vs other sites	New.CleanUp.ReferenceOTU547695	132.891	0	4	0	0	0	1.25914e-06	0	7.08632e-06	0	0	0	0.00085936	1.3739e-06	0	0	Bacteria;Proteobacteria;Epsilonproteobacteria;Campylobacterales;Helicobacteraceae;Sulfurovum;uncultured bacterium
g_test	inactive chimneys vs other sites	New.ReferenceOTU1137	132.549	0	4	0	0	1.34298e-05	0	0	0.000147041	0	6.86991e-06	0.00153658	0	0	0	0	Unassigned
g_test	inactive chimneys vs other sites	JF320730.1.1463	132.217	0	4	0	0	1.22089e-06	0	0	0	0	0	0	0	1.3739e-06	3.3597e-06	0.000770817	Bacteria;Proteobacteria;Zetaproteobacteria;Mariprofundales;Mariprofundaceae;Mariprofundus;uncultured bacterium
g_test	inactive chimneys vs other sites	AJ567598.1.1486	131.625	0	5	0.00024605	0.000501791	0.000235632	0.000246792	7.21238e-06	0	0	0	0	0	0	0	0	Bacteria;Acidobacteria;Acidobacteria;Subgroup 5;uncultured bacterium;uncultured bacterium;uncultured bacterium
g_test	inactive chimneys vs other sites	FJ628293.1.1478	130.204	0	7	0	0	1.0988e-05	1.25914e-06	0.000543333	0.000393291	0.000229903	8.93089e-05	0	0	0	1.67985e-06	0	Bacteria;Proteobacteria;Epsilonproteobacteria;Campylobacterales;Campylobacteraceae;Arcobacter;uncultured epsilon proteobacterium
g_test	inactive chimneys vs other sites	GU474891.23044.24522	129.622	0	6	0.00020272	0.00049521	0.000172145	0.000327377	1.08186e-05	7.08632e-06	0	0	0	0	0	0	0	Bacteria;Proteobacteria;Gammaproteobacteria;Oceanospirillales;SAR86 clade;uncultured bacterium;uncultured bacterium
g_test	inactive chimneys vs other sites	AJ575988.1.1298	129.296	0	9	0	1.64522e-06	1.0988e-05	0	0.000691186	0.00230483	0.000296815	0	2.00337e-06	9.40593e-05	0.000199216	0	2.00212e-06	Bacteria;Bacteroidetes;Sphingobacteriia;Sphingobacteriales;WCHB1-69
g_test	inactive chimneys vs other sites	EU466029.1.1389	129.11	0	4	0	0	1.22089e-06	1.25914e-06	0	0	0	0	6.01011e-06	0	0	0.000658501	0	Bacteria;Proteobacteria;Gammaproteobacteria;Enterobacteriales;Enterobacteriaceae;Escherichia-Shigella
g_test	inactive chimneys vs other sites	New.ReferenceOTU2018	129.006	0	5	0	0	0	0	0.000231998	1.77158e-06	0.0010929	1.71748e-05	2.00337e-06	0	0	0	0	Bacteria;Proteobacteria;Epsilonproteobacteria;Campylobacterales;Helicobacteraceae;Sulfurovum;uncultured bacterium
g_test	inactive chimneys vs other sites	New.ReferenceOTU380	128.852	0	6	0.000324971	0.000399787	0.000313769	0.000154875	6.01032e-06	5.31474e-06	0	0	0	0	0	0	0	Bacteria;Acidobacteria;Holophagae;Subgroup 10;NS72;uncultured bacterium;uncultured bacterium
g_test	inactive chimneys vs other sites	EF687174.1.1362	128.767	0	4	0	0	0	0	0	8.8579e-06	0	0	0	0.000613523	0.000130521	1.51187e-05	0	Bacteria;Bacteroidetes;Flavobacteriia;Flavobacteriales;Flavobacteriaceae;uncultured;uncultured bacterium
g_test	inactive chimneys vs other sites	JN662298.1.1374	128.516	0	5	0	0	2.93013e-05	1.25914e-06	0.000980884	3.18884e-05	0	0	0	2.13771e-06	0	0	0	Bacteria;Proteobacteria;Epsilonproteobacteria;Campylobacterales;Campylobacteraceae;Campylobacter;uncultured epsilon proteobacterium
g_test	inactive chimneys vs other sites	New.ReferenceOTU1546	128.39	0	4	0	0	0	0	0.000888325	1.06295e-05	6.34806e-05	9.61788e-05	0	0	0	0	0	Bacteria;Proteobacteria;Epsilonproteobacteria;Campylobacterales;Helicobacteraceae;Sulfurovum;uncultured epsilon proteobacterium
g_test	inactive chimneys vs other sites	JQ287050.1.1446	128.092	0	6	0	0	0	0	2.40413e-06	1.77158e-06	0	0	0	1.71017e-05	0.000478118	4.19963e-05	4.00424e-06	Bacteria;Proteobacteria;Alphaproteobacteria;Rhizobiales;Phyllobacteriaceae;Pseudahrensia;uncultured bacterium
g_test	inactive chimneys vs other sites	New.CleanUp.ReferenceOTU685719	128.082	0	6	0	0	8.54623e-06	2.51829e-06	0.000929195	2.48021e-05	1.71569e-06	6.69817e-05	0	0	0	0	0	Bacteria;Proteobacteria;Epsilonproteobacteria;Nautiliales;Nautiliaceae;Nitratiruptor
g_test	inactive chimneys vs other sites	FJ825854.1.1399	127.902	0	6	0.000314139	0.000391561	0.000203889	0.000299676	1.08186e-05	0	0	0	0	0	0	1.67985e-06	0	Bacteria;Proteobacteria;Gammaproteobacteria;Oceanospirillales;JL-ETNP-Y6
g_test	inactive chimneys vs other sites	GU941095.1.1324	127.466	0	6	0.000498289	0.000447499	1.0988e-05	0.000255606	2.40413e-05	1.06295e-05	0	0	0	0	0	0	0	Bacteria;Proteobacteria;Alphaproteobacteria;Rhodospirillales;Rhodospirillaceae;AEGEAN-169 marine group
g_test	inactive chimneys vs other sites	JF809773.1.1368	127.312	0	5	0.000374491	0.000310946	0.000347953	0.000141024	0	5.31474e-06	0	0	0	0	0	0	0	Bacteria;Chloroflexi;SAR202 clade;uncultured bacterium;uncultured bacterium;uncultured bacterium;uncultured bacterium
g_test	inactive chimneys vs other sites	New.ReferenceOTU1753	127.135	0	6	0.000761361	8.22608e-06	0.000395568	3.27377e-05	3.60619e-06	0	0	0	0	0	1.3739e-06	0	0	Bacteria;Proteobacteria;Gammaproteobacteria;Oceanospirillales;SUP05 cluster;uncultured gamma proteobacterium;uncultured gamma proteobacterium
g_test	inactive chimneys vs other sites	New.ReferenceOTU277	127.004	0	6	0.000230575	0.000376754	0.000239294	0.000304713	2.40413e-06	1.94874e-05	0	0	0	0	0	0	0	Bacteria;Proteobacteria;Alphaproteobacteria;SAR11 clade;Surface 1;uncultured bacterium;uncultured bacterium
g_test	inactive chimneys vs other sites	New.ReferenceOTU482	126.705	0	4	0	0	0	0	0	8.8579e-06	0	0	0	4.27542e-06	0.000523457	0	4.00424e-06	Bacteria;Planctomycetes;Planctomycetacia;Planctomycetales;Planctomycetaceae;Pir4 lineage
g_test	inactive chimneys vs other sites	JQ287353.1.1488	126.528	0	5	0	0	4.02894e-05	0	3.60619e-06	2.1259e-05	0	0	0	2.9928e-05	0.000629247	0	0	Bacteria;Bacteroidetes;Flavobacteriia;Flavobacteriales;Flavobacteriaceae;Pibocella
g_test	inactive chimneys vs other sites	AY734434.1.1461	125.609	0	7	0.000167128	3.94852e-05	0.000145286	0.000203981	0.000105782	0.000653713	0	0	0	0	4.12171e-06	0	0	Bacteria;Proteobacteria;Gammaproteobacteria;Alteromonadales;Alteromonadaceae;Marinobacter
g_test	inactive chimneys vs other sites	AY216438.1.1365	125.465	0	5	0	0	6.10445e-06	0	0.000970065	0.000187787	0	0	0	2.13771e-06	8.24341e-06	0	0	Bacteria;Proteobacteria;Epsilonproteobacteria;Campylobacterales;Helicobacteraceae;Sulfurimonas;uncultured bacterium
g_test	inactive chimneys vs other sites	New.CleanUp.ReferenceOTU961544	125.309	0	4	3.09496e-06	1.64522e-06	0	0	4.80825e-05	0.00137297	0	0	0	0	0	0	0	Bacteria;Proteobacteria;Gammaproteobacteria;Oceanospirillales;SUP05 cluster
g_test	inactive chimneys vs other sites	New.ReferenceOTU1549	125.252	0	9	0	1.64522e-06	0	1.25914e-06	0.0003498	0.000285224	0.000742895	0.00042937	2.00337e-06	4.91674e-05	1.23651e-05	0	0	Bacteria;Proteobacteria;Epsilonproteobacteria;Campylobacterales;Helicobacteraceae;Sulfurimonas
g_test	inactive chimneys vs other sites	New.CleanUp.ReferenceOTU406936	124.3	0	6	0	0	1.22089e-06	0	1.20206e-06	1.77158e-06	0	0	0	2.56525e-05	0.000269285	0	0.000328348	Bacteria;Proteobacteria;Alphaproteobacteria;OCS116 clade;uncultured bacterium;uncultured bacterium;uncultured bacterium
g_test	inactive chimneys vs other sites	New.ReferenceOTU929	124.175	0	7	0	0	0	0	2.16371e-05	1.59442e-05	0.00168481	1.37398e-05	0	6.41313e-06	1.92346e-05	0	2.00212e-06	Bacteria;Bacteroidetes;VC2,1 Bac22;uncultured bacterium;uncultured bacterium;uncultured bacterium;uncultured bacterium
g_test	inactive chimneys vs other sites	FJ205360.1.1490	124.109	0	8	0.000303307	0.000435982	0.000278363	0.000180057	1.20206e-05	7.08632e-06	0	0	0	0	0	1.67985e-06	2.00212e-06	Bacteria;Acidobacteria;Acidobacteria;Subgroup 9
g_test	inactive chimneys vs other sites	AY592409.1.1321	123.956	0	7	0.000264619	0.000396497	0.000314989	0.000209018	3.60619e-06	1.06295e-05	0	0	0	0	0	3.3597e-06	0	Bacteria;Acidobacteria;Acidobacteria;Subgroup 6;uncultured bacterium;uncultured bacterium;uncultured bacterium
g_test	inactive chimneys vs other sites	New.CleanUp.ReferenceOTU558173	123.914	0	7	0.000374491	0.000319172	0.000278363	0.000192649	1.08186e-05	5.31474e-06	0	0	0	0	0	1.67985e-06	0	Bacteria;Chloroflexi;SAR202 clade
g_test	inactive chimneys vs other sites	New.CleanUp.ReferenceOTU210637	123.222	0	4	0	0	1.22089e-06	0	0	0	0	0	0	0	2.7478e-06	1.67985e-06	0.000718762	Bacteria;Chlorobi;Chlorobia;Chlorobiales;OPB56;uncultured bacterium;uncultured bacterium
g_test	inactive chimneys vs other sites	JQ196603.1.1362	123.215	0	5	0	0	6.10445e-06	0	0.000252433	0.00123833	0	0	0	6.41313e-06	6.86951e-06	0	0	Bacteria;Proteobacteria;Gammaproteobacteria;Alteromonadales;Psychromonadaceae;Psychromonas
g_test	inactive chimneys vs other sites	New.CleanUp.ReferenceOTU296822	123.153	0	6	0.000250692	0.000368528	0.000291793	0.000207759	1.32227e-05	5.31474e-06	0	0	0	0	0	0	0	Bacteria;Chloroflexi;S085;uncultured bacterium;uncultured bacterium;uncultured bacterium;uncultured bacterium
g_test	inactive chimneys vs other sites	New.ReferenceOTU1609	122.564	0	8	0	0	0.000103776	3.77743e-06	0.000442359	0.000361402	0.000315687	1.03049e-05	0	2.13771e-06	2.7478e-06	0	0	Bacteria;Proteobacteria;Deltaproteobacteria;Bdellovibrionales;Bdellovibrionaceae;Bdellovibrio;uncultured bacterium
g_test	inactive chimneys vs other sites	New.CleanUp.ReferenceOTU923421	122.075	0	6	0.00039925	0.000335624	0.000268596	0.0001171	1.32227e-05	1.94874e-05	0	0	0	0	0	0	0	Bacteria;Chloroflexi;SAR202 clade;uncultured bacterium;uncultured bacterium;uncultured bacterium;uncultured bacterium
g_test	inactive chimneys vs other sites	HQ439543.1.1416	121.921	0	6	0.000281642	1.64522e-05	0.000142844	0.000458328	0.000123813	3.54316e-05	0	0	0	0	0	0	0	Bacteria;Proteobacteria;Gammaproteobacteria;Alteromonadales;Alteromonadaceae;Alteromonas
g_test	inactive chimneys vs other sites	New.ReferenceOTU2088	121.459	0	6	0.000345089	0.000411304	0.000252724	0.000118359	1.44248e-05	1.24011e-05	0	0	0	0	0	0	0	Bacteria;Planctomycetes;Planctomycetacia;Planctomycetales;Planctomycetaceae;uncultured
g_test	inactive chimneys vs other sites	FJ205348.1.1440	121.151	0	5	0.000315686	0.000289558	0.000282025	0.000221609	4.80825e-06	0	0	0	0	0	0	0	0	Bacteria;Chloroflexi;SAR202 clade
g_test	inactive chimneys vs other sites	JX879028.1.1406	121.042	0	8	0.000281642	0.000444208	0.000189238	0.000284566	4.80825e-06	5.31474e-06	0	0	0	0	1.3739e-06	3.3597e-06	0	Bacteria;Proteobacteria;Alphaproteobacteria;SAR11 clade;Deep 1;uncultured bacterium;uncultured bacterium
g_test	inactive chimneys vs other sites	AB121095.1.1460	120.979	0	5	0	0	0	0	5.7699e-05	8.8579e-06	0	0	0	7.69576e-05	0.000581161	0	8.00849e-06	Bacteria;Proteobacteria;Alphaproteobacteria;Caulobacterales;Hyphomonadaceae;Robiginitomaculum;uncultured bacterium
g_test	inactive chimneys vs other sites	GQ375276.1.1509	120.535	0	6	0.000273904	0.00041953	9.8892e-05	0.000331155	1.08186e-05	3.54316e-06	0	0	0	0	0	0	0	Bacteria;Deferribacteres;Deferribacteres;Deferribacterales;SAR406 clade(Marine group A);uncultured Marinimicrobia bacterium;uncultured Marinimicrobia bacterium
g_test	inactive chimneys vs other sites	FN562884.1.1223	120.401	0	7	0	0	1.22089e-05	0	0.000794564	0.000510215	5.14708e-06	4.98069e-05	0	2.13771e-05	1.09912e-05	0	0	Bacteria;BD1-5;uncultured bacterium;uncultured bacterium;uncultured bacterium;uncultured bacterium;uncultured bacterium
g_test	inactive chimneys vs other sites	FN553501.1.1520	120.381	0	6	0.000143916	0.000588987	0.000174587	0.000232941	2.40413e-06	8.8579e-06	0	0	0	0	0	0	0	Bacteria;Gemmatimonadetes;Gemmatimonadetes;BD2-11 terrestrial group;uncultured bacterium;uncultured bacterium;uncultured bacterium
g_test	inactive chimneys vs other sites	New.ReferenceOTU1731	119.842	0	8	0	0	0	0	4.80825e-06	1.94874e-05	4.4608e-05	1.71748e-06	2.00337e-06	0.000198807	0.000479492	1.67985e-06	0	Bacteria;Proteobacteria;Gammaproteobacteria;Thiotrichales;Piscirickettsiaceae;Thiomicrospira;uncultured gamma proteobacterium
g_test	inactive chimneys vs other sites	New.CleanUp.ReferenceOTU136719	119.772	0	7	0.000735054	8.22608e-06	0.000311327	3.65151e-05	1.20206e-05	4.96042e-05	0	0	0	0	0	0	2.00212e-06	Bacteria;Proteobacteria;Gammaproteobacteria;Alteromonadales;Idiomarinaceae;Idiomarina
g_test	inactive chimneys vs other sites	New.ReferenceOTU366	119.61	0	4	0	0	2.44178e-06	0	0.000283687	0	0.000861278	7.04166e-05	0	0	0	0	0	Bacteria;Proteobacteria;Epsilonproteobacteria;Nautiliales;Nautiliaceae;Thioreductor
g_test	inactive chimneys vs other sites	New.ReferenceOTU1907	119.148	0	4	0	3.29043e-06	4.88356e-06	0	3.12536e-05	0.0013216	0	0	0	0	0	0	0	Bacteria;Proteobacteria;Alphaproteobacteria;DB1-14;uncultured bacterium;uncultured bacterium;uncultured bacterium
g_test	inactive chimneys vs other sites	EF573597.1.1440	118.84	0	6	0.000547809	0.000370174	2.44178e-06	0.000234201	6.01032e-06	7.08632e-06	0	0	0	0	0	0	0	Bacteria;Proteobacteria;Alphaproteobacteria;SAR11 clade;uncultured bacterium;uncultured bacterium;uncultured bacterium
g_test	inactive chimneys vs other sites	New.ReferenceOTU611	118.593	0	7	1.08324e-05	0	1.22089e-06	0	2.40413e-06	8.8579e-06	0	0	0	2.13771e-06	3.15997e-05	0	0.000724768	Unassigned
g_test	inactive chimneys vs other sites	New.ReferenceOTU134	118.151	0	6	0	0	1.34298e-05	0	0.000377448	0.000161214	0.000633091	6.18292e-05	0	6.41313e-06	0	0	0	Bacteria;Proteobacteria;Epsilonproteobacteria;Campylobacterales;Helicobacteraceae;Sulfurovum;uncultured bacterium
g_test	inactive chimneys vs other sites	New.ReferenceOTU1769	117.763	0	9	0	0	8.54623e-06	0	7.09217e-05	1.59442e-05	0.00165564	0.000273079	8.01348e-06	0.00110947	0.00130795	3.69567e-05	0	Bacteria;Proteobacteria;Gammaproteobacteria;Thiotrichales;Piscirickettsiaceae;Thiomicrospira;uncultured gamma proteobacterium
g_test	inactive chimneys vs other sites	JQ712467.1.1317	117.49	0	6	3.09496e-06	0	5.24982e-05	0	0.000390671	0.00171666	0	0	0	6.41313e-06	9.34253e-05	0	0	Bacteria;BD1-5;uncultured bacterium;uncultured bacterium;uncultured bacterium;uncultured bacterium;uncultured bacterium
g_test	inactive chimneys vs other sites	New.ReferenceOTU2000	116.718	0	11	4.64245e-06	1.64522e-06	0.00045295	2.51829e-06	0.000307728	0.000435809	8.23532e-05	5.15243e-06	1.80303e-05	6.41313e-06	1.64868e-05	0	0	Bacteria;Proteobacteria;Epsilonproteobacteria;Campylobacterales;Helicobacteraceae;Sulfurovum;uncultured epsilon proteobacterium
g_test	inactive chimneys vs other sites	HQ672454.1.1516	116.551	0	6	0.000205815	0.00049192	0.000159937	0.000265679	8.41444e-06	0	0	0	0	0	0	1.67985e-06	0	Bacteria;Proteobacteria;Gammaproteobacteria;E01-9C-26 marine group;uncultured bacterium;uncultured bacterium;uncultured bacterium
g_test	inactive chimneys vs other sites	JQ678560.1.1472	116.376	0	5	0	0	2.44178e-06	0	6.85176e-05	0.00010098	0	1.88923e-05	0.00126813	0	0	0	0	Bacteria;Proteobacteria;Epsilonproteobacteria;Nautiliales;Nautiliaceae;Nautilia
g_test	inactive chimneys vs other sites	DQ070808.1.1414	116.252	0	5	1.54748e-06	0	1.22089e-06	0	0	8.8579e-06	0	0	0	0	4.12171e-06	0	0.000714758	Bacteria;Proteobacteria;Deltaproteobacteria;Sh765B-TzT-29;uncultured bacterium;uncultured bacterium;uncultured bacterium
g_test	inactive chimneys vs other sites	JQ678506.1.1414	116.222	0	5	0.000122251	0.000396497	0.000201447	0.000339969	0	7.08632e-06	0	0	0	0	0	0	0	Bacteria;Proteobacteria;Alphaproteobacteria;Rhodospirillales;Rhodospirillaceae;AEGEAN-169 marine group;uncultured bacterium
g_test	inactive chimneys vs other sites	New.CleanUp.ReferenceOTU363246	116.173	0	5	0	0	0	0	4.08701e-05	0	6.86277e-05	0.000121941	0.00132823	6.41313e-06	0	0	0	Archaea;Nanoarchaeota;Nanoarchaeota Incertae Sedis;Unknown Order;Unknown Family;Nanoarchaeum;uncultured nanoarchaeote
g_test	inactive chimneys vs other sites	EU775002.1.1308	116.057	0	5	0	0	0	0	1.20206e-06	0	0	0	8.01348e-06	0	1.3739e-06	0.000591307	2.00212e-06	Bacteria;Proteobacteria;Gammaproteobacteria;Enterobacteriales;Enterobacteriaceae;Escherichia-Shigella
g_test	inactive chimneys vs other sites	New.ReferenceOTU2596	115.914	0	6	0.000354373	0.000276396	0.000313769	0.000119619	6.01032e-06	5.31474e-06	0	0	0	0	0	0	0	Bacteria;Chloroflexi;SAR202 clade
g_test	inactive chimneys vs other sites	KF286059.1.1375	115.914	0	6	0.000354373	0.000255008	0.000236853	0.000216573	6.01032e-06	3.54316e-06	0	0	0	0	0	0	0	Bacteria;Chloroflexi;SAR202 clade
g_test	inactive chimneys vs other sites	HM799037.1.1448	115.914	0	6	0.000490552	0.000195781	0.000242957	0.000142283	3.60619e-06	1.06295e-05	0	0	0	0	0	0	0	Bacteria;Chloroflexi;SAR202 clade;uncultured Chloroflexi bacterium;uncultured Chloroflexi bacterium;uncultured Chloroflexi bacterium;uncultured Chloroflexi bacterium
g_test	inactive chimneys vs other sites	AY280434.1.1402	115.631	0	8	1.54748e-06	0	3.66267e-06	0	0.000385862	0.000738749	5.14708e-06	4.12195e-05	1.20202e-05	0	1.3739e-06	0	0	Bacteria;Proteobacteria;Epsilonproteobacteria;Campylobacterales;Campylobacteraceae;Campylobacter;uncultured epsilon proteobacterium
g_test	inactive chimneys vs other sites	EU107485.1.1485	115.568	0	6	0	0	0	0	6.97197e-05	2.48021e-05	0	0	0	7.26822e-05	0.000570169	1.67985e-06	5.00531e-05	Bacteria;Proteobacteria;Gammaproteobacteria;Thiotrichales;Thiotrichaceae;Thiothrix;uncultured bacterium
g_test	inactive chimneys vs other sites	New.ReferenceOTU1	115.298	0	5	0.00106157	1.64522e-06	1.46507e-05	1.63689e-05	4.92846e-05	0	0	0	0	0	0	0	0	Bacteria;Proteobacteria;Gammaproteobacteria;Alteromonadales;Idiomarinaceae;Idiomarina;uncultured bacterium
g_test	inactive chimneys vs other sites	New.CleanUp.ReferenceOTU502659	114.956	0	5	0	0	0	0	2.28392e-05	2.1259e-05	0	0	0	0	0.000555056	1.67985e-06	4.00424e-06	Bacteria;Proteobacteria;Gammaproteobacteria;Thiotrichales;Thiotrichaceae;uncultured
g_test	inactive chimneys vs other sites	HQ153979.1.1370	114.601	0	9	0	0	0.000258829	2.51829e-06	0.000411106	0.000324199	0.000121814	0.000106484	1.00168e-05	2.13771e-06	1.23651e-05	0	0	Bacteria;Proteobacteria;Epsilonproteobacteria;Campylobacterales;Helicobacteraceae;Sulfurovum;uncultured bacterium
[truncated: 2,980 more rows]

## Sheet: Arc inactive chimney vs others
Supplementary Table S5: significant differences between counts in distinct bacterial and archaeal groups found in relation to habitat types.
[truncated: 1,118 more rows]

## Sheet: Bac open ocean vs chimneys
Supplementary Table S5: significant differences between counts in distinct bacterial and archaeal groups found in relation to habitat types.
[truncated: 720 more rows]

[truncated: 1 more sheets: Arc open ocean vs chimneys]
