# Supplementary material for: Hydrothermal chimneys host habitat-specific microbial communities: analogues for studying the possible impact of mining seafloor massive sulfide deposits
Source: Sci Rep. 2018 Jul 10;8:10386. doi: 10.1038/s41598-018-28613-5 (PMC6039533; doi:10.1038/s41598-018-28613-5)
Supplement: Supplementary file 6 — Supplementary Table S6: significant differences between counts in distinct bacterial and archaeal groups found in relation to mineralogy. [file 41598_2018_28613_MOESM6_ESM.xlsx]

## Sheet: Bac ccp
Supplementary Table S6: significant differences between counts in distinct bacterial and archaeal groups found in relation to mineralogy.
						active chimneys			inactive chimneys
Test	Variable	#OTU ID	Test-Statistic	FDR_P	n_sites	S5	S6	S8	S7	S1	S2	S4	taxonomy
g_test	ccp	JQ712402.1.1377	166233	0	7	0.173901	0.0226395	0.00674014	0.000178804	0.000110601	1.10196e-05	4.83045e-05	Bacteria;Proteobacteria;Epsilonproteobacteria;Campylobacterales;Helicobacteraceae;Sulfurovum;uncultured bacterium
g_test	ccp	AB858534.1.1408	155807	0	4	0	0	0	0.00012234	0.000453464	0.393849	0.000788974	Bacteria;Proteobacteria;Deltaproteobacteria;Desulfobacterales;Desulfobulbaceae;Desulfobulbus;uncultured bacterium
g_test	ccp	GQ867408.1.1451	146705	0	7	3.04312e-05	3.25514e-05	0.00261877	4.70537e-06	0.000116131	0.379116	0.00053135	Bacteria;Proteobacteria;Gammaproteobacteria;Enterobacteriales;Enterobacteriaceae;Escherichia-Shigella
g_test	ccp	FJ820437.1.1482	131938	0	6	0.025412	0.473491	0.000157601	0.00813324	9.40108e-05	0	8.05075e-05	Bacteria;Proteobacteria;Epsilonproteobacteria;Campylobacterales;Helicobacteraceae;Sulfurimonas;uncultured bacterium
g_test	ccp	AY531584.1.1473	94413.9	0	5	0.000197803	4.52102e-05	0.282332	8.46967e-05	0	5.50981e-06	0	Bacteria;Proteobacteria;Epsilonproteobacteria;Nautiliales;Nautiliaceae;Nitratifractor;uncultured bacterium
g_test	ccp	EF444735.1.1240	40212.1	0	5	0.0351842	0.000160948	1.07946e-05	9.41075e-06	1.84335e-06	0	0	Bacteria;Proteobacteria;Epsilonproteobacteria;Campylobacterales;Helicobacteraceae;Sulfurimonas;uncultured bacterium
g_test	ccp	AY531572.1.1473	39737.3	0	6	0.0477789	0.00598222	0.00199916	0.00793091	0.000923518	9.18302e-06	0	Bacteria;Proteobacteria;Epsilonproteobacteria;Campylobacterales;Helicobacteraceae;Sulfurovum;uncultured bacterium
g_test	ccp	New.ReferenceOTU1163	35109.8	0	5	0.0316884	0.000672728	0.000144648	7.05806e-06	0	1.8366e-06	0	Bacteria;Proteobacteria;Epsilonproteobacteria;Nautiliales;Nautiliaceae;Thioreductor
g_test	ccp	JQ287449.1.1504	34628.3	0	7	0.0558736	0.00882866	0.000781528	0.06492	0.130201	0.00526555	4.83045e-05	Bacteria;Proteobacteria;Gammaproteobacteria;Thiotrichales;Piscirickettsiaceae;Thiomicrospira;uncultured gamma proteobacterium
g_test	ccp	New.ReferenceOTU1843	31017.9	0	6	2.47254e-05	1.08505e-05	0.0918792	0.000211742	3.31803e-05	5.50981e-06	0	Bacteria;Proteobacteria;Deltaproteobacteria;Desulfobacterales;Desulfobulbaceae;Desulfobulbus
g_test	ccp	New.ReferenceOTU2026	30423.8	0	5	7.6078e-06	9.04205e-06	0.0012349	0.0963919	0.000234105	0	0	Bacteria;Proteobacteria;Gammaproteobacteria;Methylococcales;Marine Methylotrophic Group 2;uncultured gamma proteobacterium;uncultured gamma proteobacterium
g_test	ccp	New.ReferenceOTU633	28693.6	0	4	0.0248889	3.61682e-06	1.07946e-05	7.05806e-06	0	0	0	Bacteria;Caldiserica;Caldisericia;Caldisericales;Caldisericaceae;Caldisericum
g_test	ccp	AY225615.1.1425	23889	0	7	0.0338015	0.0382858	2.15892e-05	0.000519944	9.03241e-05	1.8366e-06	1.61015e-05	Bacteria;Proteobacteria;Epsilonproteobacteria;Campylobacterales;Helicobacteraceae;Sulfurimonas;uncultured bacterium
g_test	ccp	AY531587.1.1446	23666.6	0	6	0.0272131	0.00260954	0.0990274	0.0164853	0.0077734	4.40785e-05	0	Bacteria;Proteobacteria;Epsilonproteobacteria;Campylobacterales;Helicobacteraceae;Sulfurovum;uncultured bacterium
g_test	ccp	AY327884.1.1457	23450.8	0	7	1.90195e-05	3.61682e-06	0.000751303	0.0685549	0.00510239	1.8366e-06	4.83045e-05	Bacteria;Bacteroidetes;Flavobacteriia;Flavobacteriales;Flavobacteriaceae;Lutibacter;uncultured bacterium
g_test	ccp	New.ReferenceOTU2391	21139.4	0	5	0.018797	9.40373e-05	0.000172713	7.05806e-06	2.21202e-05	0	0	Bacteria;Proteobacteria;Deltaproteobacteria;Desulfurellales;Desulfurellaceae;Hippea
g_test	ccp	New.ReferenceOTU1895	20993.1	0	4	0.0183881	8.13784e-05	1.07946e-05	1.41161e-05	0	0	0	Bacteria;Proteobacteria;Epsilonproteobacteria;Campylobacterales;Helicobacteraceae;Sulfurimonas;uncultured bacterium
g_test	ccp	AY251057.1.1427	20760.2	0	6	0.0360667	0.0441596	0.00537786	1.17634e-05	5.53005e-06	3.67321e-06	0	Bacteria;Proteobacteria;Epsilonproteobacteria;Nautiliales;Nautiliaceae;uncultured
g_test	ccp	FJ905684.1.1378	19297.1	0	7	0.00127431	0.00059135	0.000680059	0.0612663	0.0120629	3.67321e-05	0.000692365	Bacteria;Proteobacteria;Epsilonproteobacteria;Campylobacterales;Helicobacteraceae;Sulfurovum;uncultured bacterium
g_test	ccp	EU574671.1.1438	17331.3	0	6	0.00548142	0.0712278	6.26086e-05	0.00243738	0.000114288	0	3.2203e-05	Bacteria;Proteobacteria;Epsilonproteobacteria;Campylobacterales;Helicobacteraceae;Sulfurimonas
g_test	ccp	New.ReferenceOTU9	16518.4	0	5	0.000401312	0.0448594	5.1814e-05	4.70537e-06	9.21674e-06	0	0	Bacteria;Proteobacteria;Epsilonproteobacteria;Nautiliales;Nautiliaceae;uncultured
g_test	ccp	JN662285.1.1386	15884	0	6	0.0157386	0.00113026	0.000507346	4.94064e-05	2.21202e-05	1.8366e-06	0	Bacteria;Proteobacteria;Epsilonproteobacteria;Campylobacterales;Helicobacteraceae;Sulfurovum
g_test	ccp	New.ReferenceOTU883	15788.8	0	5	0.0137074	3.61682e-06	6.47675e-06	4.70537e-06	0	1.8366e-06	0	Bacteria;Proteobacteria;Epsilonproteobacteria;Nautiliales;Nautiliaceae;Caminibacter
g_test	ccp	FN562914.1.1348	15500.5	0	6	0.000368978	3.61682e-06	0	0.00212918	0.0575291	0.00408645	0.0536019	Bacteria;Bacteroidetes;Cytophagia;Cytophagales;Flammeovirgaceae;uncultured;uncultured bacterium
g_test	ccp	FN562844.1.1365	14664.1	0	7	0.0215472	0.00649581	0.000610974	0.00408191	0.00180832	4.22419e-05	8.05075e-05	Bacteria;Proteobacteria;Epsilonproteobacteria;Campylobacterales;Helicobacteraceae;Sulfurovum;uncultured epsilon proteobacterium
g_test	ccp	FR852970.1.1474	14258.6	0	6	0.016935	0.00754469	4.74962e-05	5.41118e-05	7.37339e-06	1.8366e-06	0	Bacteria;Proteobacteria;Epsilonproteobacteria;Campylobacterales;Helicobacteraceae;Sulfurovum;uncultured bacterium
g_test	ccp	AY531562.1.1495	14051.5	0	4	0.0124825	0.000162757	0	2.35269e-06	1.65901e-05	0	0	Bacteria;Bacteroidetes;Flavobacteriia;Flavobacteriales;R103-B20;uncultured bacterium;uncultured bacterium
g_test	ccp	New.ReferenceOTU79	13847.8	0	4	0	0	0	5.64645e-05	0.0366255	0.000462824	1.61015e-05	Bacteria;Proteobacteria;Gammaproteobacteria;Thiotrichales;Piscirickettsiaceae;endosymbionts;uncultured bacterium
g_test	ccp	New.ReferenceOTU2465	13418.5	0	4	0.0116418	3.61682e-06	4.31784e-06	2.35269e-06	0	0	0	Bacteria;Proteobacteria;Epsilonproteobacteria;Campylobacterales;Helicobacteraceae;Sulfurimonas;uncultured bacterium
g_test	ccp	AB476182.1.1462	13312	0	7	0.000273881	3.61682e-06	0.000371334	0.0343186	0.0090748	3.67321e-06	1.61015e-05	Bacteria;Proteobacteria;Gammaproteobacteria;Thiotrichales;Thiotrichaceae;uncultured;uncultured bacterium
g_test	ccp	New.ReferenceOTU2516	12758.6	0	7	0.000412723	5.42523e-06	0.000265547	0.0255972	0.0195008	0.001214	0.000466944	Bacteria;Bacteroidetes;Flavobacteriia;Flavobacteriales;Flavobacteriaceae;Lutibacter;uncultured bacterium
g_test	ccp	DQ270642.1.1451	12609.2	0	5	5.70585e-06	1.80841e-06	0.000170555	0.0378336	0.0020793	0	0	Bacteria;Proteobacteria;Alphaproteobacteria;SB1-18;uncultured bacterium;uncultured bacterium;uncultured bacterium
g_test	ccp	New.ReferenceOTU1263	12318.8	0	4	0.0113451	0.000164565	0.00031952	0	5.53005e-06	0	0	Bacteria;Proteobacteria;Epsilonproteobacteria;Nautiliales;Nautiliaceae;Nitratifractor;uncultured bacterium
g_test	ccp	New.ReferenceOTU2421	12082.1	0	5	7.6078e-06	1.80841e-06	0.035566	0.000207036	4.2397e-05	0	0	Bacteria;Aquificae;Aquificae;Aquificales;Desulfurobacteriaceae;Desulfurobacterium
g_test	ccp	AB842295.1.1433	12056.2	0	6	0.019651	0.0148	0.000103628	0.00315495	0.000291249	9.18302e-06	0	Bacteria;Proteobacteria;Epsilonproteobacteria;Campylobacterales;Helicobacteraceae;Sulfurovum;uncultured bacterium
g_test	ccp	JQ287020.1.1482	11768.8	0	6	3.8039e-06	1.80841e-06	0.000274183	0.0334293	0.00620655	0.000920139	0	Bacteria;Bacteroidetes;Cytophagia;Cytophagales;Flammeovirgaceae;Flexithrix
g_test	ccp	New.ReferenceOTU1465	11618	0	4	0	0	0	0.0016163	0.0358015	0.00388442	1.61015e-05	Bacteria;Proteobacteria;Gammaproteobacteria;Xanthomonadales;uncultured
g_test	ccp	HM557570.1.1378	11450.7	0	6	3.8039e-06	1.80841e-06	0.0002785	0	1.10601e-05	0.0298448	8.05075e-05	Bacteria;Proteobacteria;Gammaproteobacteria;Xanthomonadales;Xanthomonadaceae;Stenotrophomonas
g_test	ccp	FJ497620.1.1420	11418	0	5	0.0182777	0.0269996	1.51124e-05	0.000232916	0.00111338	0	0	Bacteria;Proteobacteria;Epsilonproteobacteria;Campylobacterales;Campylobacteraceae;Sulfurospirillum;uncultured bacterium
g_test	ccp	JQ712373.1.1376	11295	0	7	5.70585e-06	3.61682e-06	0.000371334	0.0359138	0.000975131	1.8366e-06	0.00169066	Bacteria;Proteobacteria;Epsilonproteobacteria;Campylobacterales;Helicobacteraceae;Sulfurimonas;uncultured bacterium
g_test	ccp	AY251062.1.1454	11294.3	0	6	0.00704102	0.00105973	0.0595408	4.23484e-05	8.11073e-05	5.50981e-06	0	Bacteria;Proteobacteria;Epsilonproteobacteria;Nautiliales;Nautiliaceae;Nitratifractor;uncultured bacterium
g_test	ccp	AY280410.1.1408	11287	0	5	0.011988	0.00278676	6.47675e-06	9.41075e-06	3.6867e-06	0	0	Bacteria;Proteobacteria;Epsilonproteobacteria;Campylobacterales;Campylobacteraceae;Thiofractor;uncultured bacterium
g_test	ccp	CP002683.864391.865952	11194.8	0	5	9.50975e-06	7.23364e-06	0.0331739	7.76387e-05	2.02768e-05	0	0	Bacteria;Thermodesulfobacteria;Thermodesulfobacteria;Thermodesulfobacteriales;Thermodesulfobacteriaceae;Thermodesulfatator
g_test	ccp	New.ReferenceOTU2137	11146.1	0	4	0.0106072	0.000698046	8.20389e-05	4.70537e-06	0	0	0	Unassigned
g_test	ccp	New.ReferenceOTU1168	11039.3	0	5	1.14117e-05	1.80841e-06	0.000606656	0.0277099	0.00577521	0	0	Bacteria;Bacteroidetes;Flavobacteriia;Flavobacteriales;Flavobacteriaceae
g_test	ccp	AB100010.1.1315	10888.5	0	5	9.12936e-05	0	0	0.000101166	0.0393223	0.00677156	4.83045e-05	Bacteria;Bacteroidetes;VC2,1 Bac22;uncultured alpha proteobacterium;uncultured alpha proteobacterium;uncultured alpha proteobacterium;uncultured alpha proteobacterium
g_test	ccp	New.ReferenceOTU2480	9954.34	0	7	0.00247063	0.000247752	0.000205097	0.0178687	0.0227101	1.8366e-06	1.61015e-05	Bacteria;Proteobacteria;Epsilonproteobacteria;Campylobacterales;Helicobacteraceae;Sulfurimonas;uncultured bacterium
g_test	ccp	AB095118.1.1050	9936.69	0	4	1.90195e-06	0.000231476	0.0304774	2.82322e-05	0	0	0	Archaea;Euryarchaeota;Methanococci;Methanococcales;Methanocaldococcaceae;Methanocaldococcus
g_test	ccp	New.ReferenceOTU1489	9904.55	0	4	0.00898101	0.000269453	8.63567e-06	0	1.84335e-06	0	0	Bacteria;Proteobacteria;Epsilonproteobacteria;Nautiliales;Nautiliaceae;Nitratifractor
g_test	ccp	New.ReferenceOTU1615	9858.57	0	5	1.14117e-05	1.80841e-06	0.0292555	1.64688e-05	3.6867e-05	0	0	Bacteria;Thermodesulfobacteria;Thermodesulfobacteria;Thermodesulfobacteriales;Thermodesulfobacteriaceae;Thermodesulfatator
g_test	ccp	JQ287102.1.1446	9732.63	0	5	1.90195e-06	0	0	0.000585819	0.0250677	1.10196e-05	0.00196438	Bacteria;Proteobacteria;Alphaproteobacteria;Rhizobiales;Hyphomicrobiaceae;uncultured;uncultured bacterium
g_test	ccp	AY251063.1.1482	9605.28	0	5	0.00910654	0.000311046	0.000287136	2.35269e-06	0	5.50981e-06	0	Bacteria;Proteobacteria;Epsilonproteobacteria;Nautiliales;Nautiliaceae;Nitratifractor;uncultured bacterium
g_test	ccp	FR852972.1.1536	9296.31	0	5	7.6078e-06	6.69112e-05	0.0280098	7.05806e-06	0	5.50981e-06	0	Bacteria;Proteobacteria;Deltaproteobacteria;Desulfovibrionales;Desulfohalobiaceae;Desulfothermus
g_test	ccp	New.ReferenceOTU677	9263.63	0	5	0.00987112	0.00217913	6.04497e-05	7.05806e-06	0	7.34642e-06	0	Bacteria;Proteobacteria;Epsilonproteobacteria;Nautiliales;Nautiliaceae;Thioreductor
g_test	ccp	JQ611151.1.1378	8953.75	0	4	1.71176e-05	3.61682e-06	0.0267447	7.05806e-06	0	0	0	Bacteria;Proteobacteria;Epsilonproteobacteria;Nautiliales;Nautiliaceae;Nitratifractor;uncultured bacterium
g_test	ccp	JQ287054.1.1513	8490.87	0	5	0	3.61682e-06	0	9.88128e-05	0.0216243	5.69347e-05	1.61015e-05	Bacteria;Proteobacteria;Gammaproteobacteria
g_test	ccp	AB842284.1.1464	8311.02	0	6	1.90195e-06	1.80841e-06	0	0.00100224	0.0212557	0.000112033	0.00141693	Bacteria;Proteobacteria;Gammaproteobacteria;Order Incertae Sedis;Family Incertae Sedis;Marinicella;uncultured bacterium
g_test	ccp	New.ReferenceOTU911	7829.36	0	5	0.006925	9.04205e-06	4.31784e-06	2.35269e-06	6.63605e-05	0	0	Bacteria;Proteobacteria;Deltaproteobacteria;Desulfobacterales;Desulfobulbaceae;Desulfobulbus;uncultured delta proteobacterium
g_test	ccp	New.ReferenceOTU1674	7684.11	0	5	1.90195e-06	1.80841e-06	0.0226384	0.000105871	0	1.8366e-06	0	Bacteria;Aquificae;Aquificae;Aquificales;Desulfurobacteriaceae;Desulfurobacterium
g_test	ccp	AB476216.1.1305	7445.03	0	4	0	0	0	0.00152219	0.0238198	0.00337568	0.00202879	Bacteria;Proteobacteria;Alphaproteobacteria;Rhizobiales;Phyllobacteriaceae
g_test	ccp	New.ReferenceOTU1473	7098.99	0	4	0	0	0	7.76387e-05	0.0236354	0.00328752	1.61015e-05	Bacteria;Proteobacteria;Gammaproteobacteria;Xanthomonadales;JTB255 marine benthic group
g_test	ccp	FR852993.1.1458	7080.8	0	6	0.00772002	0.00158055	0.000200779	2.58796e-05	3.6867e-06	9.18302e-06	0	Bacteria;Proteobacteria;Epsilonproteobacteria;Campylobacterales;Helicobacteraceae;Sulfurovum
g_test	ccp	AB057722.1.1392	7032.33	0	4	5.70585e-06	0	0.0208336	1.64688e-05	5.53005e-06	0	0	Archaea;Euryarchaeota;Methanococci;Methanococcales;Methanococcaceae;uncultured
g_test	ccp	JQ287080.1.1521	6954.84	0	4	0.000117921	0	0	0.000185862	0.0250695	0.00367137	0	Bacteria;Proteobacteria;Deltaproteobacteria;Desulfobacterales;Desulfobulbaceae;Desulfobulbus;uncultured bacterium
g_test	ccp	New.ReferenceOTU2022	6910.29	0	5	1.90195e-06	1.80841e-06	8.85156e-05	0.021193	0.00077052	0	0	Bacteria;Actinobacteria;Acidimicrobiia;Acidimicrobiales;uncultured;uncultured bacterium;uncultured bacterium
g_test	ccp	KC294233.1.1370	6821.77	0	4	0	0	2.15892e-06	0	7.37339e-06	0.0171667	4.83045e-05	Bacteria;Actinobacteria;Actinobacteria;Micrococcales;Micrococcaceae;Kocuria
g_test	ccp	JN662083.1.1394	6789.66	0	4	1.90195e-06	0	0.00019862	0.0210824	0.000444247	0	0	Bacteria;Proteobacteria;Gammaproteobacteria;Methylococcales;Marine Methylotrophic Group 2
g_test	ccp	DQ832646.1.1381	6728.38	0	7	0.00138652	1.26589e-05	0.000213733	0.0189462	0.0186086	0.00386054	0.0100312	Bacteria;Proteobacteria;Alphaproteobacteria;Rhodobacterales;Rhodobacteraceae;uncultured;uncultured bacterium
g_test	ccp	GQ349546.1.1352	6712.92	0	7	0.00993008	0.0261406	8.63567e-06	0.000985776	0.000248852	1.8366e-06	0.000434741	Bacteria;Proteobacteria;Epsilonproteobacteria;Campylobacterales;Helicobacteraceae;Sulfurimonas;uncultured epsilon proteobacterium
g_test	ccp	New.ReferenceOTU190	6615.27	0	5	0	0	1.94303e-05	0.00118811	7.18906e-05	0.0192274	0.000144914	Bacteria;Proteobacteria;Deltaproteobacteria;Desulfobacterales;Desulfobulbaceae;Desulfobulbus;uncultured bacterium
g_test	ccp	GQ433956.1.1444	6421.2	0	5	0.00581046	3.61682e-06	2.15892e-06	9.41075e-06	0.000162215	0	0	Bacteria;Bacteroidetes;VC2,1 Bac22;uncultured bacterium;uncultured bacterium;uncultured bacterium;uncultured bacterium
g_test	ccp	DQ456289.1.1457	6393.86	0	6	1.90195e-06	3.61682e-06	0.000142489	0	1.47468e-05	0.016647	8.05075e-05	Bacteria;Proteobacteria;Gammaproteobacteria;Enterobacteriales;Enterobacteriaceae;Enterobacter;uncultured bacterium
g_test	ccp	FN554145.1.1470	6355.79	0	6	0.00591697	3.9785e-05	0.000114423	0.000176451	2.58069e-05	1.8366e-06	0	Bacteria;Proteobacteria;Epsilonproteobacteria;Campylobacterales;Helicobacteraceae;Sulfurovum
g_test	ccp	New.ReferenceOTU2439	6353.78	0	5	0.00833054	8.68037e-05	0.00712875	3.7643e-05	5.53005e-06	0	0	Bacteria;Bacteroidetes;Flavobacteriia;Flavobacteriales;R103-B20;uncultured bacterium;uncultured bacterium
g_test	ccp	FJ497650.1.1461	6000.56	0	4	0	0	0	1.88215e-05	0.000383416	3.30589e-05	0.143158	Bacteria;Proteobacteria;Gammaproteobacteria;Thiotrichales;Thiotrichaceae;uncultured;uncultured sediment bacterium
g_test	ccp	FR853025.1.1494	5742.83	0	5	0.00800721	0.000256794	0.00759507	7.05806e-06	1.84335e-06	0	0	Bacteria;Deinococcus-Thermus;Deinococci;Thermales;Thermaceae;Oceanithermus;uncultured bacterium
g_test	ccp	New.ReferenceOTU1738	5388.29	0	5	0.00630306	0.00126046	0.000630404	2.35269e-06	0	3.67321e-06	0	Bacteria;Proteobacteria;Epsilonproteobacteria;Nautiliales;Nautiliaceae;Thioreductor
g_test	ccp	FN562824.1.1388	5333.64	0	4	0	0	0	0.000103518	0.013427	3.67321e-06	8.05075e-05	Bacteria;Proteobacteria;Gammaproteobacteria;Order Incertae Sedis;Family Incertae Sedis;Marinicella;uncultured gamma proteobacterium
g_test	ccp	New.ReferenceOTU1912	5263.56	0	7	1.14117e-05	9.04205e-06	2.15892e-06	0.00331494	0.0115449	7.34642e-06	0.00146524	Bacteria;Proteobacteria;Alphaproteobacteria;Rhodobacterales;Rhodobacteraceae
g_test	ccp	FN562856.1.1370	5164.56	0	7	0.0319376	0.0332567	0.0242706	0.0454704	0.00424708	1.8366e-05	8.05075e-05	Bacteria;Proteobacteria;Epsilonproteobacteria;Campylobacterales;Helicobacteraceae;Sulfurovum;uncultured epsilon proteobacterium
g_test	ccp	New.ReferenceOTU1008	5097.99	0	5	0.000131235	2.71261e-05	0	0.00281617	0.0120186	1.8366e-06	0	Bacteria;Proteobacteria;Gammaproteobacteria;Order Incertae Sedis;Family Incertae Sedis;Marinicella;uncultured bacterium
g_test	ccp	New.CleanUp.ReferenceOTU506940	4988.08	0	4	0	0	2.15892e-06	0.00124928	0.0182307	0.00618936	0	Bacteria;Proteobacteria;Gammaproteobacteria;Thiotrichales;Piscirickettsiaceae;endosymbionts;uncultured bacterium
g_test	ccp	New.ReferenceOTU1045	4915.44	0	5	5.32546e-05	0	0	0.00112458	0.0138528	1.8366e-06	0.0053135	Bacteria;Bacteroidetes;Flavobacteriia;Flavobacteriales;Flavobacteriaceae;uncultured;uncultured Bacteroidetes bacterium
g_test	ccp	DQ395426.1.1417	4859.39	0	4	0	0	0	0.000112929	0.0123762	1.8366e-06	0.000386436	Bacteria;Proteobacteria;Alphaproteobacteria;Caulobacterales;Hyphomonadaceae;uncultured
g_test	ccp	JQ712381.1.1383	4845.64	0	6	0.00947362	0.00217009	0.000129535	0.00549588	0.00547106	5.50981e-06	0	Bacteria;Proteobacteria;Epsilonproteobacteria;Campylobacterales;Helicobacteraceae;Sulfurimonas;uncultured epsilon proteobacterium
g_test	ccp	JX527407.1.1423	4682.15	0	6	1.90195e-06	1.80841e-06	0.00019862	0.0140385	0.000683882	0	1.61015e-05	Bacteria;Bacteroidetes;Flavobacteriia;Flavobacteriales;Flavobacteriaceae;uncultured
g_test	ccp	AF449223.1.1378	4674	0	5	6.08624e-05	3.61682e-06	0	0.0141938	0.00137698	0	4.83045e-05	Bacteria;Proteobacteria;Alphaproteobacteria;Rhodobacterales;Rhodobacteraceae;Roseobacter clade NAC11-7 lineage;uncultured alpha proteobacterium
g_test	ccp	New.ReferenceOTU1840	4549.68	0	6	1.90195e-06	0	0.000174872	0.00725333	0.00568673	1.8366e-06	1.61015e-05	Bacteria;Proteobacteria;Gammaproteobacteria;Methylococcales
g_test	ccp	New.ReferenceOTU1032	4496.1	0	5	0	0	0.000138171	0.000766976	0.0135652	1.8366e-06	0.0127363	Bacteria;Bacteroidetes;Flavobacteriia;Flavobacteriales;Flavobacteriaceae
g_test	ccp	New.ReferenceOTU979	4268.9	0	5	3.8039e-06	0	8.20389e-05	0.00523943	0.00666739	0	3.2203e-05	Bacteria;Proteobacteria;Gammaproteobacteria;Thiotrichales;Piscirickettsiaceae;Marine Methylotrophic Group 3;uncultured gamma proteobacterium
g_test	ccp	New.ReferenceOTU1543	3905.07	0	4	0	0	0	2.35269e-05	0.00983979	1.8366e-06	1.61015e-05	Bacteria;Proteobacteria;Gammaproteobacteria;Methylococcales;Marine Methylotrophic Group 2
g_test	ccp	JN662165.1.1232	3790.78	0	5	0.00385525	0.000421359	0.000110105	0	1.84335e-06	5.50981e-06	0	Bacteria;Proteobacteria;Epsilonproteobacteria;Campylobacterales;Helicobacteraceae;Sulfurovum;uncultured epsilon proteobacterium
g_test	ccp	KC682271.1.1447	3666.82	0	5	0.000121725	1.80841e-06	0.000105787	0.0093284	0.00290696	0	0	Bacteria;Proteobacteria;Alphaproteobacteria;Rhodobacterales;Rhodobacteraceae;Roseobacter clade NAC11-7 lineage;uncultured alpha proteobacterium
g_test	ccp	JF155704.1.1375	3611.1	0	4	0	0	4.74962e-05	0	5.53005e-06	0.00927485	1.61015e-05	Bacteria;Proteobacteria;Gammaproteobacteria;Pseudomonadales;Moraxellaceae;Enhydrobacter
g_test	ccp	New.ReferenceOTU37	3607.43	0	6	5.70585e-06	0	0.000155442	0.0114764	9.95408e-05	1.8366e-06	4.83045e-05	Bacteria;Proteobacteria;Gammaproteobacteria;Thiotrichales;Thiotrichaceae;uncultured;uncultured bacterium
g_test	ccp	New.ReferenceOTU1053	3571.85	0	5	0	3.61682e-06	0	0.000256443	0.0134601	0.00367505	0.00449232	Bacteria;Proteobacteria;Gammaproteobacteria;Chromatiales;Ectothiorhodospiraceae;Acidiferrobacter;uncultured bacterium
g_test	ccp	New.ReferenceOTU2268	3495.92	0	5	0.00532927	0.000815593	2.15892e-06	0.00273147	0.00077605	0	0	Bacteria;Proteobacteria;Gammaproteobacteria;Thiotrichales;Piscirickettsiaceae;Thiomicrospira;uncultured bacterium
g_test	ccp	KC682834.1.1417	3478.46	0	4	0	0	4.31784e-06	0.00110106	0.00869876	0	0.0021737	Bacteria;Proteobacteria;Alphaproteobacteria;Caulobacterales;Hyphomonadaceae;Robiginitomaculum;uncultured bacterium
g_test	ccp	DQ228627.1.1360	3376.9	0	4	0.00959534	0.0274734	0.00721726	2.11742e-05	0	0	0	Archaea;Euryarchaeota;Archaeoglobi;Archaeoglobales;Archaeoglobaceae;uncultured;uncultured archaeon
g_test	ccp	JF076235.1.1372	3361.18	0	5	7.6078e-06	0	0.000146806	0	3.6867e-06	0.00903426	3.2203e-05	Bacteria;Firmicutes;Bacilli;Bacillales;Staphylococcaceae;Staphylococcus
g_test	ccp	JQ287480.1.1461	3355.09	0	4	0	0	0	3.29376e-05	0.00907112	9.18302e-06	0.113049	Bacteria;Proteobacteria;Alphaproteobacteria;SB1-18;uncultured bacterium;uncultured bacterium;uncultured bacterium
g_test	ccp	JF214014.1.1341	3343.11	0	4	0	0	9.71513e-05	0	3.6867e-06	0.0087404	1.61015e-05	Bacteria;Actinobacteria;Actinobacteria;Propionibacteriales;Propionibacteriaceae;Propionibacterium;uncultured bacterium
g_test	ccp	New.ReferenceOTU672	3330.76	0	4	1.90195e-06	1.80841e-06	0.00987273	9.41075e-06	0	0	0	Bacteria;Thermodesulfobacteria;Thermodesulfobacteria;Thermodesulfobacteriales;Thermodesulfobacteriaceae;uncultured Thermodesulfobacteriaceae bacterium;uncultured Thermodesulfobacteriaceae bacterium
g_test	ccp	EU491713.1.1444	3234.09	0	4	0	0	0	3.05849e-05	0.00999464	0.000830145	0.000225421	Bacteria;Bacteroidetes;Flavobacteriia;Flavobacteriales;Flavobacteriaceae;Maritimimonas
g_test	ccp	AJ431251.1.1522	3220.34	0	4	0.00336265	8.13784e-05	0.00057859	2.35269e-06	0	0	0	Bacteria;Firmicutes;Clostridia;Thermoanaerobacterales;Thermodesulfobiaceae;Coprothermobacter
g_test	ccp	New.ReferenceOTU1253	3209.78	0	5	3.8039e-06	3.0743e-05	0.00972593	9.41075e-06	0	1.8366e-06	0	Bacteria;Proteobacteria;Deltaproteobacteria;Desulfovibrionales;Desulfohalobiaceae;Desulfothermus
g_test	ccp	New.ReferenceOTU2098	3207.73	0	4	0.00330179	0.00012478	0.000408035	2.35269e-06	0	0	0	Bacteria;Proteobacteria;Epsilonproteobacteria;Nautiliales;Nautiliaceae;Caminibacter;uncultured bacterium
g_test	ccp	AB440165.1.1431	3178.92	0	6	0.000102705	2.89346e-05	4.31784e-06	0.00663458	0.00405168	0	0.000434741	Bacteria;Proteobacteria;Epsilonproteobacteria;Campylobacterales;Helicobacteraceae;Sulfurovum;uncultured bacterium
g_test	ccp	New.ReferenceOTU2264	3156.14	0	5	0.00365175	0.000495504	0.000535412	4.70537e-06	0	1.8366e-06	0	Bacteria;Proteobacteria;Epsilonproteobacteria;Nautiliales;Nautiliaceae;Caminibacter
g_test	ccp	AF449251.1.1429	3151.67	0	6	0.00286814	1.08505e-05	2.15892e-06	8.70494e-05	3.6867e-06	5.50981e-06	0	Bacteria;Proteobacteria;Epsilonproteobacteria;Campylobacterales;Helicobacteraceae;Sulfurovum
g_test	ccp	New.ReferenceOTU105	3105.32	0	5	3.8039e-06	3.61682e-06	0.00920779	5.88172e-05	1.84335e-06	0	0	Bacteria;Proteobacteria;Epsilonproteobacteria;Campylobacterales;Helicobacteraceae;Sulfurovum;uncultured bacterium
g_test	ccp	New.ReferenceOTU1138	3066.33	0	5	0	0	7.55621e-05	0.00128457	0.00963334	0.00191558	4.83045e-05	Bacteria;Proteobacteria;Gammaproteobacteria;Chromatiales;Ectothiorhodospiraceae;Acidiferrobacter;uncultured bacterium
g_test	ccp	AB238959.1.1410	3014.97	0	4	0	0	4.10194e-05	0.00171981	0.00622314	1.8366e-06	0	Bacteria;Proteobacteria;Gammaproteobacteria;BD7-8 marine group
g_test	ccp	FJ792087.1.1341	2996.45	0	4	0.00417098	0.00405626	0	7.05806e-05	1.10601e-05	0	0	Bacteria;BD1-5;uncultured bacterium;uncultured bacterium;uncultured bacterium;uncultured bacterium;uncultured bacterium
g_test	ccp	New.ReferenceOTU1938	2958.12	0	5	1.90195e-06	3.61682e-06	0.00874578	4.23484e-05	9.21674e-06	0	0	Bacteria;Aquificae;Aquificae;Aquificales;Desulfurobacteriaceae;Desulfurobacterium
g_test	ccp	JN662233.1.1483	2954.94	0	6	0.000119823	0	2.37481e-05	0.000717569	0.00207192	5.50981e-06	0.107542	Bacteria;Bacteroidetes;Flavobacteriia;Flavobacteriales;Flavobacteriaceae;uncultured Bacteroidetes bacterium;uncultured Bacteroidetes bacterium
g_test	ccp	FJ937713.1.1224	2934.13	0	5	1.90195e-06	0	0.000123058	0.007091	0.00177699	0	1.61015e-05	Bacteria;Proteobacteria;Gammaproteobacteria;Methylococcales;Marine Methylotrophic Group 2;uncultured bacterium;uncultured bacterium
g_test	ccp	New.ReferenceOTU2005	2901.05	0	4	0	0	0	0.00942957	5.53005e-05	1.8366e-06	0.000225421	Bacteria;Bacteroidetes;Flavobacteriia;Flavobacteriales;Flavobacteriaceae;Tenacibaculum
g_test	ccp	FM165250.1.1493	2812.2	0	4	0	0	4.31784e-06	0.000348198	0.00720934	0	0.000933887	Bacteria;Bacteroidetes;Flavobacteriia;Flavobacteriales;Flavobacteriaceae;Lutibacter
g_test	ccp	JF320726.1.1466	2808.99	0	5	3.8039e-06	0	0	0.000715217	0.00811811	1.8366e-06	0.00592535	Bacteria;Proteobacteria;Gammaproteobacteria;Order Incertae Sedis;Family Incertae Sedis;Marinicella;uncultured bacterium
g_test	ccp	New.ReferenceOTU1662	2804.62	0	4	1.90195e-06	1.80841e-06	0.00829456	3.7643e-05	0	0	0	Unassigned
g_test	ccp	New.ReferenceOTU1525	2796.46	0	5	0	0	3.88605e-05	0.00172687	0.00869876	0.00217087	1.61015e-05	Bacteria;Bacteroidetes;Cytophagia;Cytophagales;Flammeovirgaceae
g_test	ccp	JN662133.1.1359	2773.12	0	6	0.00291759	0.000311046	2.5907e-05	0.000119987	4.42404e-05	1.8366e-06	0	Bacteria;Proteobacteria;Epsilonproteobacteria;Campylobacterales;Helicobacteraceae;Sulfurovum;uncultured bacterium
g_test	ccp	New.ReferenceOTU2142	2765.45	0	4	0.00261328	0.000179033	4.31784e-06	0	0	1.8366e-06	0	Bacteria;Proteobacteria;Epsilonproteobacteria;Nautiliales;Nautiliaceae;Thioreductor
g_test	ccp	GQ903355.1.1494	2754.43	0	4	1.90195e-06	0	9.06746e-05	0.00223976	0.00513926	0	0	Bacteria;Proteobacteria;Gammaproteobacteria;Thiotrichales;Piscirickettsiaceae;endosymbionts;uncultured bacterium
g_test	ccp	FJ192817.1.1458	2666.92	0	4	0	0	0.000222369	0	1.84335e-06	0.00730601	3.2203e-05	Bacteria;Proteobacteria;Betaproteobacteria;Burkholderiales;Comamonadaceae;Delftia;Delftia tsuruhatensis
g_test	ccp	New.ReferenceOTU544	2655.22	0	4	0.000523036	0.00958276	2.15892e-06	0.000174099	0	0	0	Bacteria;Proteobacteria;Epsilonproteobacteria;Campylobacterales;Helicobacteraceae;Sulfurimonas;uncultured bacterium
g_test	ccp	HQ153930.1.1376	2651.24	0	4	1.90195e-06	0	2.15892e-06	0.00682985	0.00135855	0	0	Bacteria;Proteobacteria;Alphaproteobacteria;Rhizobiales
g_test	ccp	AB476180.1.1417	2600.43	0	5	3.8039e-06	0	0	0.000265854	0.0101974	1.8366e-06	0.0374682	Bacteria;Proteobacteria;Alphaproteobacteria;OCS116 clade;uncultured bacterium;uncultured bacterium;uncultured bacterium
g_test	ccp	AB181499.1.1451	2597.36	0	6	0.00123437	9.04205e-05	7.988e-05	0.00619933	0.00583973	1.46928e-05	0	Bacteria;Proteobacteria;Epsilonproteobacteria;Campylobacterales;Helicobacteraceae;Sulfurimonas;uncultured bacterium
g_test	ccp	New.ReferenceOTU1380	2561.41	0	4	0.0028282	0.000781233	2.37481e-05	2.35269e-06	0	0	0	Bacteria;Proteobacteria;Epsilonproteobacteria;Campylobacterales;Helicobacteraceae;Sulfurovum
g_test	ccp	New.ReferenceOTU1257	2522.16	0	5	1.90195e-06	0	0.000196462	0.00631226	0.00132721	9.18302e-06	0	Bacteria;Proteobacteria;Gammaproteobacteria;Methylococcales;IheB2-23;uncultured bacterium;uncultured bacterium
g_test	ccp	New.ReferenceOTU331	2514.23	0	4	3.8039e-06	0	7.988e-05	0.00797796	7.55773e-05	0	0	Bacteria;Bacteroidetes;Flavobacteriia;Flavobacteriales;Flavobacteriaceae;Lutibacter
g_test	ccp	JN662209.1.1349	2512.25	0	7	0.0040968	0.0276144	1.29535e-05	0.00971189	0.000224889	5.50981e-06	0.000837278	Bacteria;Proteobacteria;Epsilonproteobacteria;Campylobacterales;Helicobacteraceae;Sulfurimonas;uncultured bacterium
g_test	ccp	New.ReferenceOTU1966	2478.21	0	4	0.00220246	0	2.80659e-05	2.35269e-06	9.21674e-06	0	0	Bacteria;Bacteroidetes;VC2,1 Bac22
g_test	ccp	HQ757403.1.1452	2354.77	0	5	1.90195e-06	0	1.29535e-05	0	3.6867e-06	0.00602039	1.61015e-05	Bacteria;Proteobacteria;Gammaproteobacteria;Enterobacteriales;Enterobacteriaceae;Enterobacter
g_test	ccp	JN662191.1.1362	2328.53	0	6	0.0022424	8.86121e-05	7.34032e-05	1.17634e-05	3.6867e-06	0	3.2203e-05	Bacteria;Proteobacteria;Epsilonproteobacteria;Campylobacterales;Helicobacteraceae;Sulfurovum;uncultured bacterium
g_test	ccp	New.CleanUp.ReferenceOTU474543	2271.59	0	5	0.00206362	3.43598e-05	2.15892e-06	1.41161e-05	1.10601e-05	0	0	Bacteria;Proteobacteria;Epsilonproteobacteria;Campylobacterales;Helicobacteraceae;Sulfurovum;uncultured bacterium
g_test	ccp	New.ReferenceOTU2365	2240.68	0	4	1.52156e-05	9.04205e-06	0.00689558	2.35269e-06	0	0	0	Bacteria;Proteobacteria;Epsilonproteobacteria;Nautiliales;Nautiliaceae;Nitratifractor;uncultured bacterium
g_test	ccp	AF332514.1.1497	2182.73	0	4	9.50975e-06	0.00878164	0.00535196	2.35269e-05	0	0	0	Bacteria;Thermodesulfobacteria;Thermodesulfobacteria;Thermodesulfobacteriales;Thermodesulfobacteriaceae;Caldimicrobium
g_test	ccp	GU940889.1.1356	2132.08	0	6	7.6078e-06	9.04205e-06	0.000131694	0	3.6867e-06	0.00584775	6.4406e-05	Bacteria;Proteobacteria;Gammaproteobacteria;Pseudomonadales;Pseudomonadaceae;uncultured;uncultured bacterium
g_test	ccp	AY531558.1.1384	2130.75	0	6	0.00236222	7.0528e-05	7.988e-05	0.000531707	4.05537e-05	1.8366e-06	0	Bacteria;Bacteroidetes;Flavobacteriia;Flavobacteriales;Flavobacteriaceae;Maritimimonas
g_test	ccp	New.ReferenceOTU1608	2081.98	0	4	0	0	0	3.29376e-05	0.00565171	1.8366e-06	0.001111	Bacteria;Proteobacteria;Alphaproteobacteria;DB1-14;uncultured bacterium;uncultured bacterium;uncultured bacterium
g_test	ccp	GU061224.1.1423	2069.65	0	6	0.000100803	1.98925e-05	3.23838e-05	0.0036302	0.00327379	0	8.05075e-05	Bacteria;Bacteroidetes;Flavobacteriia;Flavobacteriales;Cryomorphaceae;Fluviicola;uncultured bacterium
g_test	ccp	New.ReferenceOTU929	2064.75	0	5	0.00186772	1.44673e-05	0	7.05806e-06	2.58069e-05	0	1.61015e-05	Bacteria;Bacteroidetes;VC2,1 Bac22;uncultured bacterium;uncultured bacterium;uncultured bacterium;uncultured bacterium
g_test	ccp	New.ReferenceOTU1042	2063.61	0	4	1.90195e-06	0	8.63567e-06	0.00644166	0.000176961	0	0	Bacteria;Proteobacteria;Deltaproteobacteria;Desulfobacterales;Desulfobulbaceae;MSBL7
g_test	ccp	KC682597.1.1256	1979.51	0	6	1.52156e-05	7.23364e-06	0	0.000985776	0.00446275	1.8366e-06	1.61015e-05	Bacteria;Proteobacteria;Alphaproteobacteria;Rhodobacterales;Rhodobacteraceae
g_test	ccp	New.ReferenceOTU2432	1958.35	0	4	9.50975e-06	0.000457528	0.00718056	0	3.6867e-06	0	0	Bacteria;Proteobacteria;Epsilonproteobacteria;Nautiliales;Nautiliaceae;Nautilia
g_test	ccp	CP001857.1049930.1051439	1947.74	0	5	1.90195e-06	0.00236359	0.00879759	2.35269e-05	1.65901e-05	0	0	Archaea;Euryarchaeota;Archaeoglobi;Archaeoglobales;Archaeoglobaceae;Archaeoglobus
g_test	ccp	DQ146934.1.1433	1934.36	0	4	0	1.80841e-06	0	0	3.6867e-06	0.00487068	4.83045e-05	Bacteria;Proteobacteria;Gammaproteobacteria;Vibrionales;Vibrionaceae;Photobacterium;Photobacterium leiognathi
g_test	ccp	DQ270646.1.1488	1909.94	0	4	0	0	0	0.000348198	0.00458072	3.67321e-06	3.2203e-05	Bacteria;Proteobacteria;Alphaproteobacteria;Rhizobiales;Phyllobacteriaceae;Pseudahrensia;uncultured bacterium
g_test	ccp	New.ReferenceOTU782	1904.87	0	4	0.00196662	0.000245944	6.04497e-05	2.35269e-06	0	0	0	Bacteria;Proteobacteria;Epsilonproteobacteria;Campylobacterales;Helicobacteraceae;Sulfurovum
g_test	ccp	GU220765.1.1464	1890.96	0	5	0	1.80841e-06	0	4.70537e-05	0.00165348	5.50981e-06	0.0607349	Bacteria;Proteobacteria;Alphaproteobacteria;OCS116 clade;uncultured bacterium;uncultured bacterium;uncultured bacterium
g_test	ccp	New.CleanUp.ReferenceOTU572128	1885.06	0	4	0.00202938	0	0.000343268	0.000108224	0.000165901	0	0	Bacteria;Proteobacteria;Deltaproteobacteria;Desulfobacterales;Desulfobulbaceae;Desulfobulbus;uncultured bacterium
g_test	ccp	New.ReferenceOTU2002	1844.73	0	4	0	0	0	0.000223505	0.00616416	0.00103585	3.2203e-05	Bacteria;Proteobacteria;Gammaproteobacteria;Order Incertae Sedis;Family Incertae Sedis;Marinicella;uncultured bacterium
g_test	ccp	JQ287017.1.1510	1830.27	0	4	0	0	0	0.000559939	0.00682039	1.8366e-06	0.0369207	Bacteria;Verrucomicrobia;Verrucomicrobiae;Verrucomicrobiales;DEV007;uncultured bacterium;uncultured bacterium
g_test	ccp	AB476212.1.1464	1824.29	0	4	0	0	0	8.46967e-05	0.00362218	9.18302e-06	0.0635043	Bacteria;Planctomycetes;Planctomycetacia;Planctomycetales;Planctomycetaceae;Bythopirellula;uncultured bacterium
g_test	ccp	FJ640814.1.1486	1823.69	0	4	0	0	0	3.05849e-05	0.00567751	0.00444458	0.0191125	Bacteria;Bacteroidetes;Cytophagia;Cytophagales;Flammeovirgaceae;Reichenbachiella;uncultured Bacteroidetes bacterium
g_test	ccp	New.ReferenceOTU234	1813.84	0	5	3.8039e-06	1.80841e-06	0.00538218	5.41118e-05	3.6867e-06	0	0	Bacteria;Proteobacteria;Epsilonproteobacteria;Campylobacterales;Helicobacteraceae;Sulfurovum;uncultured bacterium
g_test	ccp	AB476274.1.1400	1803.18	0	4	0	0	0.000168396	0.00515003	0.000376043	0	1.61015e-05	Bacteria;Proteobacteria;Alphaproteobacteria;Caulobacterales;Hyphomonadaceae;Robiginitomaculum;uncultured bacterium
g_test	ccp	New.ReferenceOTU2518	1788.93	0	5	1.90195e-06	0	0	4.94064e-05	0.00481114	7.53008e-05	9.6609e-05	Bacteria;Proteobacteria;Gammaproteobacteria;Order Incertae Sedis;Family Incertae Sedis;Marinicella
g_test	ccp	HQ153847.1.1358	1753.7	0	5	1.52156e-05	9.04205e-06	0.0054599	9.41075e-06	0	3.67321e-06	0	Bacteria;Proteobacteria;Epsilonproteobacteria;Campylobacterales;Helicobacteraceae;Sulfurovum;uncultured bacterium
g_test	ccp	New.CleanUp.ReferenceOTU427269	1732.91	0	4	1.90195e-06	0	6.90854e-05	0.0053406	0.000154841	0	0	Bacteria;Bacteroidetes;Flavobacteriia;Flavobacteriales;Flavobacteriaceae;Lutibacter;uncultured bacterium
g_test	ccp	New.ReferenceOTU1982	1662.33	0	4	0.00151395	5.42523e-06	0	1.64688e-05	3.13369e-05	0	0	Bacteria;Bacteroidetes;Sphingobacteriia;Sphingobacteriales;WCHB1-69
g_test	ccp	New.ReferenceOTU1672	1637.47	0	4	0	0	2.80659e-05	0.0022727	0.002424	0	0.000193218	Bacteria;Proteobacteria;Alphaproteobacteria;Rhizobiales;Hyphomicrobiaceae;Filomicrobium;uncultured bacterium
g_test	ccp	CP002205.2120484.2121990	1609.96	0	6	0.00220816	0.00463315	2.15892e-06	2.82322e-05	1.10601e-05	0	0.000128812	Bacteria;Proteobacteria;Epsilonproteobacteria;Campylobacterales;Helicobacteraceae;Sulfurimonas
g_test	ccp	AY251060.1.1475	1556.69	0	5	0.00295373	0.0016764	0.00123058	2.82322e-05	3.6867e-06	0	0	Bacteria;Proteobacteria;Epsilonproteobacteria;Campylobacterales;Campylobacteraceae;Thiofractor;uncultured bacterium
g_test	ccp	JQ287110.1.1470	1542.36	0	6	0.00240977	0.000924097	1.72713e-05	0.000771681	1.84335e-05	1.8366e-06	0	Bacteria;Proteobacteria;Epsilonproteobacteria;Campylobacterales;Helicobacteraceae;Sulfurovum;uncultured bacterium
g_test	ccp	New.ReferenceOTU1347	1533.31	0	4	0.00266653	0.00125684	0.00102117	2.35269e-06	0	0	0	Bacteria;Caldiserica;Caldisericia;Caldisericales;Caldisericaceae;Caldisericum
g_test	ccp	New.ReferenceOTU2231	1524.49	0	5	4.75488e-05	0	2.5907e-05	0.00303967	0.00244981	0.000202027	0	Bacteria;Bacteroidetes;Flavobacteriia;Flavobacteriales;Flavobacteriaceae;uncultured
g_test	ccp	JN662115.1.1362	1506.72	0	4	1.52156e-05	0	0	0.000159983	0.00387103	0	3.2203e-05	Bacteria;Proteobacteria;Epsilonproteobacteria;Campylobacterales;Helicobacteraceae;Sulfurovum;uncultured bacterium
g_test	ccp	AY370187.1.1454	1500.44	0	5	0	5.42523e-06	7.988e-05	0	5.53005e-06	0.00402033	1.61015e-05	Bacteria;Proteobacteria;Alphaproteobacteria;Rhizobiales;Brucellaceae
g_test	ccp	JQ287290.1.1486	1488.38	0	6	3.8039e-06	1.80841e-06	0	0.000291733	0.00532359	3.67321e-06	0.0409783	Bacteria;Bacteroidetes;Flavobacteriia;Flavobacteriales;Flavobacteriaceae
g_test	ccp	JX310176.1.1425	1466.25	0	4	0	0	0	1.17634e-05	2.94936e-05	1.8366e-06	0.033636	Bacteria;Proteobacteria;Alphaproteobacteria;Rhodobacterales;Rhodobacteraceae
g_test	ccp	JQ287046.1.1504	1458.67	0	5	0	1.80841e-06	4.10194e-05	0.000487006	0.00328116	1.8366e-06	0	Bacteria;Proteobacteria;Gammaproteobacteria;Thiotrichales;Thiotrichaceae;uncultured;uncultured bacterium
g_test	ccp	JQ287230.1.1441	1456.46	0	4	0	0	3.02249e-05	0.00314554	0.00132537	0	0.000305929	Bacteria;Proteobacteria;Alphaproteobacteria;Caulobacterales;Hyphomonadaceae;Robiginitomaculum;uncultured bacterium
g_test	ccp	JN662174.1.1366	1441.18	0	4	6.84702e-05	0	0.00482302	3.29376e-05	2.39635e-05	0	0	Bacteria;Proteobacteria;Epsilonproteobacteria;Campylobacterales;Helicobacteraceae;Sulfurovum;uncultured bacterium
g_test	ccp	EU050875.1.1358	1427.48	0	4	0	0	0	0.000425836	0.00425076	1.8366e-06	0.00436351	Bacteria;Planctomycetes;Phycisphaerae;Phycisphaerales;Phycisphaeraceae;SM1A02;uncultured bacterium
g_test	ccp	New.CleanUp.ReferenceOTU484698	1415.43	0	5	0.00218915	0.00241784	2.15892e-06	0.000171746	0	1.8366e-06	0	Bacteria;Proteobacteria;Epsilonproteobacteria;Campylobacterales;Helicobacteraceae;Sulfurimonas;uncultured bacterium
g_test	ccp	New.ReferenceOTU1676	1394.29	0	5	0.000102705	0	3.45427e-05	0.00242797	0.00297701	0.000238759	0	Bacteria;Bacteroidetes;Flavobacteriia;Flavobacteriales;Flavobacteriaceae;uncultured;uncultured bacterium
g_test	ccp	New.ReferenceOTU1298	1383.06	0	6	0.0012667	1.08505e-05	6.47675e-06	2.35269e-06	5.53005e-06	2.02027e-05	0	Bacteria;Proteobacteria;Epsilonproteobacteria;Campylobacterales;Helicobacteraceae;Sulfurovum;uncultured epsilon proteobacterium
g_test	ccp	New.ReferenceOTU1185	1382.39	0	4	3.8039e-06	0	0	0.000291733	0.00518534	0.0038734	0	Bacteria;Bacteroidetes;BD2-2;uncultured bacterium;uncultured bacterium;uncultured bacterium;uncultured bacterium
g_test	ccp	FJ628316.1.1523	1372.66	0	4	1.33137e-05	0	2.15892e-06	0.00404192	0.00044609	0	0	Bacteria;Proteobacteria;Deltaproteobacteria;Desulfobacterales;Desulfobulbaceae;Desulfocapsa;uncultured delta proteobacterium
g_test	ccp	JN873958.1.1467	1369.69	0	6	0.000182587	0.000106696	6.26086e-05	0.00443952	0.00137145	0	8.05075e-05	Bacteria;Proteobacteria;Epsilonproteobacteria;Campylobacterales;Helicobacteraceae;Sulfurovum;uncultured bacterium
g_test	ccp	New.ReferenceOTU1287	1355.96	0	5	0.0027312	0.000717939	0.00312611	9.41075e-06	2.76502e-05	0	0	Bacteria;BD1-5
g_test	ccp	GU061084.1.1385	1347.61	0	4	2.09215e-05	1.44673e-05	0	0.000141161	0.00357978	0	0	Bacteria;Proteobacteria;Alphaproteobacteria;Rhodobacterales;Rhodobacteraceae
g_test	ccp	AB476192.1.1399	1341.24	0	4	0	0	1.94303e-05	0.000298791	0.00323508	0	0.00020932	Bacteria;Proteobacteria;Alphaproteobacteria;Caulobacterales;Hyphomonadaceae;Robiginitomaculum;uncultured bacterium
g_test	ccp	FR744471.1.1447	1324.4	0	5	4.37449e-05	1.80841e-06	0	0.000329376	0.00361849	0	0.000305929	Bacteria;Bacteroidetes;Flavobacteriia;Flavobacteriales;Flavobacteriaceae;uncultured
g_test	ccp	FJ497575.1.1344	1303.44	0	4	0	0	0	3.05849e-05	3.6867e-06	5.50981e-06	0.0296751	Bacteria;Proteobacteria;Alphaproteobacteria;Rhodobacterales;Rhodobacteraceae;Pacificibacter;uncultured alpha proteobacterium
g_test	ccp	AX039566.8.1529	1284.72	0	5	0	1.80841e-06	6.69265e-05	0	7.37339e-06	0.00344914	1.61015e-05	Bacteria;Proteobacteria;Gammaproteobacteria;Enterobacteriales;Enterobacteriaceae;Escherichia-Shigella
g_test	ccp	FJ905673.1.1406	1281.86	0	4	0	0	2.15892e-05	0.00339963	0.00198897	0.00106523	0	Bacteria;Proteobacteria;Zetaproteobacteria;Mariprofundales;Mariprofundaceae;Mariprofundus;uncultured bacterium
g_test	ccp	AY531606.1.1440	1279.29	0	6	1.90195e-06	0	0.000431784	0.0002188	0.00273737	1.8366e-06	1.61015e-05	Bacteria;Proteobacteria;Epsilonproteobacteria;Campylobacterales;Campylobacteraceae;Campylobacter;uncultured bacterium
g_test	ccp	EU774572.1.1342	1271.82	0	4	5.70585e-06	0	9.06746e-05	0	1.84335e-06	0.00353914	0	Bacteria;Cyanobacteria;Chloroplast
g_test	ccp	AB842279.1.1433	1262.46	0	7	2.28234e-05	1.98925e-05	9.93102e-05	0.00403486	0.000289406	5.50981e-06	1.61015e-05	Bacteria;Proteobacteria;Epsilonproteobacteria;Campylobacterales;Helicobacteraceae;Sulfurovum;uncultured Sulfurovum sp,
g_test	ccp	HQ588379.1.1373	1255.28	0	5	8.17839e-05	5.42523e-06	0.00410842	0.000261148	6.63605e-05	0	0	Bacteria;Proteobacteria;Epsilonproteobacteria;Campylobacterales;Helicobacteraceae;Sulfurovum;uncultured bacterium
g_test	ccp	JN662076.1.1367	1254.64	0	4	0.00203889	0.000708897	0	0.000654047	0.000193552	0	0	Bacteria;Proteobacteria;Epsilonproteobacteria;Campylobacterales;Helicobacteraceae;Sulfurimonas
g_test	ccp	New.ReferenceOTU761	1244.09	0	5	1.14117e-05	1.80841e-06	0.000183508	0.00243738	0.00121661	0	0	Bacteria;Bacteroidetes;Flavobacteriia;Flavobacteriales;Flavobacteriaceae;uncultured Bacteroidetes bacterium;uncultured Bacteroidetes bacterium
g_test	ccp	JQ287071.1.1470	1226.33	0	7	0.000880603	0.000963882	0.000103628	0.00996833	5.53005e-06	1.8366e-06	4.83045e-05	Bacteria;Proteobacteria;Epsilonproteobacteria;Campylobacterales;Helicobacteraceae;Sulfurovum;uncultured epsilon proteobacterium
g_test	ccp	AB293244.1.1335	1200.84	0	4	0	0.00205074	0.00558728	4.70537e-06	0	1.8366e-06	0	Archaea;Crenarchaeota;Thermoprotei;Thermoproteales;Thermoproteaceae;uncultured;uncultured archaeon
g_test	ccp	EU050874.1.1386	1182.53	0	4	0	0	0	2.35269e-06	0.00102859	1.8366e-06	0.0378707	Bacteria;Planctomycetes;Phycisphaerae;Phycisphaerales;Phycisphaeraceae;Phycisphaera;uncultured bacterium
g_test	ccp	GQ452887.1.1498	1174.68	0	5	0	1.80841e-06	0	0.000336434	0.00393924	0.00354832	0.00193218	Bacteria;Verrucomicrobia;Verrucomicrobiae;Verrucomicrobiales;DEV007;uncultured bacterium;uncultured bacterium
g_test	ccp	JN874001.1.1481	1163.89	0	5	0.0015577	3.61682e-06	0.00361187	6.11698e-05	6.26739e-05	0	0	Bacteria;Proteobacteria;Epsilonproteobacteria;Campylobacterales;Helicobacteraceae;Sulfurovum;uncultured epsilon proteobacterium
g_test	ccp	JN662112.1.1361	1141.97	0	4	0.00100803	3.61682e-06	2.15892e-06	4.70537e-06	0	0	0	Bacteria;Proteobacteria;Epsilonproteobacteria;Campylobacterales;Helicobacteraceae;Sulfurovum;uncultured bacterium
g_test	ccp	New.CleanUp.ReferenceOTU234817	1118.46	0	5	0	0	3.88605e-05	0.00124928	0.0018286	1.8366e-06	1.61015e-05	Bacteria;Proteobacteria;Gammaproteobacteria;Thiotrichales;Piscirickettsiaceae;endosymbionts;uncultured bacterium
g_test	ccp	JN232988.1.1444	1099.01	0	6	2.28234e-05	1.80841e-06	0	0.00162806	0.00311895	0.00100462	0.000112711	Bacteria;Bacteroidetes;Flavobacteriia;Flavobacteriales;Flavobacteriaceae;Polaribacter
g_test	ccp	FN554151.1.1500	1088.52	0	4	0	0	0	2.35269e-06	5.89872e-05	1.8366e-06	0.0257785	Bacteria;Proteobacteria;Gammaproteobacteria;Thiotrichales;Thiotrichaceae;uncultured;uncultured sediment bacterium
g_test	ccp	New.CleanUp.ReferenceOTU192371	1079.92	0	5	0.00106509	0.000104888	2.15892e-06	9.41075e-06	1.84335e-06	0	0	Bacteria;Proteobacteria;Epsilonproteobacteria;Campylobacterales;Helicobacteraceae;Sulfurovum;uncultured bacterium
g_test	ccp	EF687341.1.1355	1068.35	0	6	0.000601016	0.000220626	1.29535e-05	0.00552881	0.000855314	1.8366e-06	0	Bacteria;Proteobacteria;Epsilonproteobacteria;Campylobacterales;Helicobacteraceae;Sulfurimonas;uncultured sediment bacterium
g_test	ccp	New.ReferenceOTU787	1062.38	0	4	0.00130474	0.000620285	1.29535e-05	1.17634e-05	0	0	0	Bacteria;Proteobacteria;Epsilonproteobacteria;Campylobacterales;Campylobacteraceae;Arcobacter;uncultured epsilon proteobacterium
g_test	ccp	New.ReferenceOTU2448	1053.35	0	4	0	0	0	0.000651694	0.00216593	1.8366e-06	1.61015e-05	Unassigned
g_test	ccp	New.ReferenceOTU439	1035.58	0	4	3.42351e-05	0	0	0.00353138	0.000173275	0	4.83045e-05	Bacteria;Bacteroidetes;Flavobacteriia;Flavobacteriales;Flavobacteriaceae;Lutibacter;uncultured Bacteroidetes bacterium
g_test	ccp	New.ReferenceOTU2124	1033.17	0	5	0.000346155	3.61682e-06	1.07946e-05	0.00161865	0.00260465	0	0	Bacteria;Bacteroidetes;Flavobacteriia;Flavobacteriales;Flavobacteriaceae;uncultured
g_test	ccp	New.ReferenceOTU40	1026.69	0	5	0.00149874	0.000491887	0.000284977	0.000115282	7.37339e-06	0	0	Bacteria;Proteobacteria;Epsilonproteobacteria;Campylobacterales;Helicobacteraceae;Sulfurovum;uncultured bacterium
g_test	ccp	FR853023.1.1523	1012.4	0	5	0.00118682	1.80841e-06	0.000282818	5.88172e-05	0.000237792	0	0	Bacteria;Proteobacteria;Deltaproteobacteria;Desulfobacterales;Desulfobulbaceae;Desulfobulbus;uncultured bacterium
g_test	ccp	New.ReferenceOTU1310	1007.71	0	6	0.00197422	0.000399659	4.31784e-06	0.000757565	0.00194842	3.67321e-06	0	Bacteria;Proteobacteria;Gammaproteobacteria;Thiotrichales;Piscirickettsiaceae;Thiomicrospira;uncultured gamma proteobacterium
g_test	ccp	FM165259.1.1482	998.535	0	5	8.55878e-05	0.000137439	0.00113559	0.0030632	0.000140094	0	0	Bacteria;Proteobacteria;Epsilonproteobacteria;Campylobacterales;Helicobacteraceae;Sulfurovum;uncultured bacterium
g_test	ccp	AF068783.1.1439	997.374	0	4	0.00105939	9.94625e-05	9.06746e-05	0	0	1.8366e-06	0	Bacteria;Proteobacteria;Epsilonproteobacteria;Campylobacterales;Helicobacteraceae;Sulfurovum
g_test	ccp	New.ReferenceOTU2355	996.438	0	4	0	0	0	1.41161e-05	0.00204796	0.00395237	8.05075e-05	Bacteria;Bacteroidetes;Sphingobacteriia;Sphingobacteriales;Saprospiraceae;Lewinella;uncultured bacterium
g_test	ccp	GQ357037.1.1474	985.124	0	5	0.00138652	0.000119355	0	5.41118e-05	0.000694942	0	8.05075e-05	Bacteria;Proteobacteria;Epsilonproteobacteria;Campylobacterales;Helicobacteraceae;Sulfurimonas;uncultured bacterium
g_test	ccp	New.ReferenceOTU1479	979.857	0	4	0	0	0	0.000141161	0.00274659	0.000123053	0.00020932	Bacteria;Bacteroidetes;Cytophagia;Cytophagales;Flammeovirgaceae;uncultured;uncultured bacterium
g_test	ccp	AY268936.1.1506	976.62	0	5	1.90195e-06	9.94625e-05	0.00327076	2.35269e-06	0	1.8366e-06	0	Bacteria;Aquificae;Aquificae;Aquificales;Desulfurobacteriaceae
g_test	ccp	New.ReferenceOTU2318	970.048	0	5	1.90195e-06	0	0	0.000162335	0.00256225	5.50981e-06	0.000515248	Bacteria;Proteobacteria;Alphaproteobacteria;Caulobacterales;Hyphomonadaceae;Robiginitomaculum;uncultured bacterium
g_test	ccp	New.ReferenceOTU1769	962.695	0	6	0.00183538	0.000287537	8.63567e-06	0.00122104	0.00175487	4.04053e-05	0	Bacteria;Proteobacteria;Gammaproteobacteria;Thiotrichales;Piscirickettsiaceae;Thiomicrospira;uncultured gamma proteobacterium
g_test	ccp	DQ415790.1.1470	953.65	0	5	1.71176e-05	1.80841e-05	6.04497e-05	0.00264677	0.000536414	0	0	Bacteria;Proteobacteria;Epsilonproteobacteria;Campylobacterales;Helicobacteraceae;Sulfurovum;uncultured bacterium
g_test	ccp	AB476228.1.1464	953.289	0	5	4.94507e-05	5.42523e-06	6.47675e-06	0.00218565	0.00109495	0	0	Bacteria;Proteobacteria;Gammaproteobacteria;Thiotrichales;Thiotrichaceae;uncultured;uncultured bacterium
g_test	ccp	JQ611114.1.1326	945.283	0	7	0.0012648	6.69112e-05	0.000207256	3.52903e-05	0.000442404	5.50981e-06	4.83045e-05	Bacteria;Proteobacteria;Epsilonproteobacteria;Campylobacterales;Helicobacteraceae;Sulfurovum;uncultured epsilon proteobacterium
g_test	ccp	AB858629.1.1389	917.933	0	4	0.000203509	1.80841e-06	0	0.000755212	0.00264152	0	0	Bacteria;Spirochaetae;Spirochaetes;Spirochaetales;Spirochaetaceae;Spirochaeta;uncultured bacterium
g_test	ccp	EU772607.1.1332	895.032	0	5	1.90195e-06	0	3.45427e-05	0	1.84335e-06	0.00239677	1.61015e-05	Bacteria;Proteobacteria;Gammaproteobacteria;Enterobacteriales;Enterobacteriaceae;Enterobacter;uncultured bacterium
g_test	ccp	New.ReferenceOTU1127	894.489	0	5	0.000793113	3.61682e-06	2.15892e-06	2.35269e-06	1.84335e-06	0	0	Bacteria;Proteobacteria;Epsilonproteobacteria;Campylobacterales;Helicobacteraceae;Sulfurimonas;uncultured bacterium
g_test	ccp	FJ535305.1.1335	886.708	0	4	0.000895819	0.000119355	0	7.05806e-06	1.84335e-06	0	0	Bacteria;Proteobacteria;Epsilonproteobacteria;Campylobacterales;Helicobacteraceae;Sulfurimonas;uncultured epsilon proteobacterium
g_test	ccp	EF441900.1.1412	875.208	0	7	0.000958583	0.000372532	8.63567e-05	0.00547705	0.000774206	9.18302e-06	1.61015e-05	Bacteria;Proteobacteria;Epsilonproteobacteria;Campylobacterales;Helicobacteraceae;Sulfurimonas
g_test	ccp	JN874212.1.1472	842.167	0	6	0.0010708	7.59532e-05	0.0002785	0.000152925	3.31803e-05	1.8366e-06	0	Bacteria;Proteobacteria;Epsilonproteobacteria;Campylobacterales;Helicobacteraceae;Sulfurovum;uncultured epsilon proteobacterium
g_test	ccp	JQ712408.1.1373	832.581	0	7	0.00135799	0.000620285	0.000172713	5.64645e-05	0.000156685	1.28562e-05	1.61015e-05	Bacteria;Proteobacteria;Epsilonproteobacteria;Campylobacterales;Helicobacteraceae;Sulfurovum;uncultured epsilon proteobacterium
g_test	ccp	AY531570.1.1473	832.069	0	6	0.00119252	0.000439444	3.88605e-05	0.000207036	1.29034e-05	9.18302e-06	0	Bacteria;Proteobacteria;Epsilonproteobacteria;Campylobacterales;Helicobacteraceae;Sulfurovum;uncultured bacterium
g_test	ccp	AF356635.1.1411	824.009	0	5	9.50975e-06	2.53177e-05	0.00267274	2.35269e-06	5.53005e-06	0	0	Archaea;Euryarchaeota;Thermoplasmata;Thermoplasmatales;Deep Sea Hydrothermal Vent Gp 2(DHVEG-2);uncultured archaeon;uncultured archaeon
g_test	ccp	JQ195940.1.1350	812.588	0	4	7.03722e-05	5.42523e-06	0	0.000809324	0.00190234	0	0	Bacteria;Bacteroidetes;Flavobacteriia;Flavobacteriales;Cryomorphaceae;Fluviicola;uncultured bacterium
g_test	ccp	DQ395479.1.1517	800.539	0	4	0	0	0	1.88215e-05	0.000105071	0.002248	0.000676263	Bacteria;Proteobacteria;Alphaproteobacteria;Rickettsiales;Rickettsiaceae;Rickettsia
g_test	ccp	AY263403.1.1472	799.067	0	5	0.0027274	0.00202361	0.00330746	7.05806e-05	0	1.8366e-06	0	Bacteria;Aquificae;Aquificae;Aquificales;Desulfurobacteriaceae;Thermovibrio
g_test	ccp	New.ReferenceOTU2430	779.389	0	4	0.000138842	0	0.0030635	2.58796e-05	9.21674e-06	0	0	Bacteria;Bacteroidetes;Flavobacteriia;Flavobacteriales;R103-B20;uncultured bacterium;uncultured bacterium
g_test	ccp	FJ205286.1.1488	776.908	0	4	0	3.61682e-06	0	0	1.84335e-06	1.8366e-06	0.0171642	Bacteria;Proteobacteria;Gammaproteobacteria;Thiotrichales;Thiotrichaceae;uncultured
g_test	ccp	New.ReferenceOTU2614	760.03	0	5	9.69995e-05	1.80841e-06	0.00289079	4.70537e-06	1.84335e-06	0	0	Bacteria;Candidate division OP9;uncultured bacterium;uncultured bacterium;uncultured bacterium;uncultured bacterium;uncultured bacterium
g_test	ccp	New.ReferenceOTU224	757.532	0	4	1.90195e-06	0	0.00226039	9.41075e-06	1.84335e-06	0	0	Bacteria;Aquificae;Aquificae;Aquificales;Desulfurobacteriaceae
g_test	ccp	FJ717155.1.1348	739.26	0	5	0.000842564	0.00011393	4.53373e-05	6.11698e-05	5.53005e-06	0	0	Bacteria;Proteobacteria;Epsilonproteobacteria;Campylobacterales;Helicobacteraceae;Sulfurovum;uncultured epsilon proteobacterium
g_test	ccp	FN562908.1.1347	727.837	0	4	0	0	4.31784e-06	0.000832851	0.00138067	0	0.000579654	Bacteria;Bacteroidetes;Flavobacteriia;Flavobacteriales;Flavobacteriaceae;uncultured
g_test	ccp	New.ReferenceOTU2434	689.677	0	4	0.000195901	0	0.00285193	7.05806e-06	7.00472e-05	0	0	Bacteria;Chloroflexi;Anaerolineae;Anaerolineales;Anaerolineaceae;uncultured;uncultured organism
g_test	ccp	AF420346.1.1474	684.37	0	4	0.000726545	0.000119355	1.94303e-05	2.35269e-06	0	0	0	Bacteria;Proteobacteria;Epsilonproteobacteria;Campylobacterales;Helicobacteraceae;Sulfurovum;uncultured bacterium
g_test	ccp	GU220732.1.1474	681.008	0	6	2.09215e-05	5.42523e-06	0	0.00249855	3.13369e-05	1.8366e-06	0.000112711	Bacteria;Proteobacteria;Epsilonproteobacteria;Campylobacterales;Helicobacteraceae;Sulfurovum;uncultured bacterium
g_test	ccp	AY280425.1.1435	679.198	0	5	0.00158242	0.000524439	0.00240503	7.05806e-06	1.65901e-05	0	0	Bacteria;BHI80-139
g_test	ccp	New.ReferenceOTU934	671.587	0	5	0	1.80841e-06	2.80659e-05	0.00151278	0.000534571	9.18302e-06	0	Bacteria;Proteobacteria;Zetaproteobacteria;Mariprofundales;Mariprofundaceae;Mariprofundus;uncultured bacterium
g_test	ccp	JN873951.1.1482	669.537	0	5	4.75488e-05	1.80841e-06	0.00230357	6.11698e-05	1.47468e-05	0	0	Bacteria;Proteobacteria;Epsilonproteobacteria;Campylobacterales;Helicobacteraceae;Sulfurovum;uncultured bacterium
g_test	ccp	New.ReferenceOTU128	662.971	0	5	0	1.80841e-06	0	0.000230563	0.0024664	7.34642e-06	0.0113677	Bacteria;Proteobacteria;Gammaproteobacteria;Thiotrichales;Piscirickettsiaceae;uncultured;uncultured bacterium
g_test	ccp	CP001899.1403988.1405498	641.696	0	4	1.90195e-06	0.000745065	0.00292317	0	3.6867e-06	0	0	Archaea;Euryarchaeota;Archaeoglobi;Archaeoglobales;Archaeoglobaceae;Archaeoglobus
g_test	ccp	DQ071079.1.1438	641.303	0	6	0.000941466	0.00750128	0	0.00308908	0.000200925	3.67321e-06	0.000144914	Bacteria;Proteobacteria;Epsilonproteobacteria;Campylobacterales;Helicobacteraceae;Sulfurimonas;uncultured bacterium
g_test	ccp	FN562850.1.1368	629.834	0	7	0.00105368	7.77616e-05	0.00147454	4.4701e-05	5.34571e-05	2.20393e-05	4.83045e-05	Bacteria;Proteobacteria;Epsilonproteobacteria;Campylobacterales;Helicobacteraceae;Sulfurovum;uncultured epsilon proteobacterium
g_test	ccp	KC682623.1.1471	615.989	0	5	0	1.80841e-06	4.31784e-06	0.00184686	0.000145625	7.34642e-06	0	Bacteria;Bacteroidetes;Flavobacteriia;Flavobacteriales;Flavobacteriaceae;Lutibacter;uncultured bacterium
g_test	ccp	New.ReferenceOTU2209	614.806	0	4	3.8039e-06	0	6.90854e-05	0.00182333	0.000112444	0	0	Bacteria;Proteobacteria;Gammaproteobacteria;Thiotrichales;Thiotrichaceae;uncultured
g_test	ccp	New.ReferenceOTU1549	594.598	0	5	0.000823545	0.000452102	2.15892e-06	5.41118e-05	1.65901e-05	0	0	Bacteria;Proteobacteria;Epsilonproteobacteria;Campylobacterales;Helicobacteraceae;Sulfurimonas
g_test	ccp	New.ReferenceOTU2205	590.066	0	4	0	0	0	0.000136456	0.00143044	7.34642e-06	3.2203e-05	Bacteria;Proteobacteria;Gammaproteobacteria;Order Incertae Sedis;Family Incertae Sedis;Marinicella;uncultured bacterium
g_test	ccp	JN873940.1.1483	589.623	0	5	0.000739859	0.00015914	6.47675e-06	0.00382312	3.6867e-05	0	0	Bacteria;Proteobacteria;Epsilonproteobacteria;Campylobacterales;Helicobacteraceae;Sulfurimonas;uncultured bacterium
g_test	ccp	AY531602.1.1475	589.045	0	6	0.000323332	2.35093e-05	1.29535e-05	0.00041172	0.00219174	0	8.05075e-05	Bacteria;Proteobacteria;Epsilonproteobacteria;Campylobacterales;Helicobacteraceae;Sulfurovum;uncultured bacterium
g_test	ccp	New.ReferenceOTU520	584.555	0	4	0.000694212	0.000287537	2.15892e-06	7.05806e-06	0	0	0	Bacteria;Proteobacteria;Epsilonproteobacteria;Campylobacterales;Campylobacteraceae;Thiofractor;uncultured bacterium
g_test	ccp	HQ807406.1.1453	571.229	0	4	0	0	1.29535e-05	0	5.53005e-06	0.00150051	1.61015e-05	Bacteria;Proteobacteria;Gammaproteobacteria;Enterobacteriales;Enterobacteriaceae;Escherichia-Shigella
g_test	ccp	AB476178.1.1453	563.981	0	4	7.6078e-06	0	4.31784e-06	0.0013975	0.00040738	0	0	Bacteria;Proteobacteria;Gammaproteobacteria;Thiotrichales;Thiotrichaceae;Cocleimonas
g_test	ccp	New.ReferenceOTU1055	555.79	0	4	0.000949073	0.000609434	0.000224527	1.88215e-05	0	0	0	Bacteria;Candidate division SR1;uncultured bacterium;uncultured bacterium;uncultured bacterium;uncultured bacterium;uncultured bacterium
g_test	ccp	FJ905650.1.1392	551.784	0	4	0	0	0	0.000181157	0.00176224	1.8366e-06	0.00276946	Bacteria;Planctomycetes;Planctomycetacia;Planctomycetales;Planctomycetaceae;Planctomyces;uncultured bacterium
g_test	ccp	New.ReferenceOTU556	550.23	0	4	3.8039e-06	3.61682e-06	1.72713e-05	0.0018398	0	0	0	Bacteria;Bacteroidetes;Flavobacteriia;Flavobacteriales;Flavobacteriaceae;Lutibacter;uncultured bacterium
g_test	ccp	New.CleanUp.ReferenceOTU827390	545.211	0	4	0	3.61682e-06	2.15892e-06	0.00172922	3.87103e-05	0	0	Bacteria;Bacteroidetes;Flavobacteriia;Flavobacteriales;Flavobacteriaceae;uncultured
g_test	ccp	AY327886.1.1491	539.96	0	5	0.000642859	1.80841e-06	0.00214381	1.17634e-05	1.10601e-05	0	0	Bacteria;Proteobacteria;Deltaproteobacteria;Desulfobacterales;Desulfobulbaceae;Desulfobulbus;uncultured bacterium
g_test	ccp	JX529976.1.1421	536.623	0	4	2.47254e-05	1.80841e-06	0	0.000936369	0.000827664	0	0	Bacteria;Bacteroidetes;Flavobacteriia;Flavobacteriales;Cryomorphaceae;Crocinitomix;uncultured Crocinitomix sp,
g_test	ccp	New.ReferenceOTU2322	532.837	0	4	0	0	0	2.35269e-06	0.000127191	1.8366e-06	0.0142659	Bacteria;Proteobacteria;Gammaproteobacteria;Chromatiales;Ectothiorhodospiraceae;Acidiferrobacter;uncultured bacterium
g_test	ccp	FM165252.1.1474	528.809	0	4	0	0	0	1.17634e-05	0.00153551	3.67321e-06	0.0173896	Bacteria;Proteobacteria;Alphaproteobacteria;Rhizobiales;Hyphomicrobiaceae;uncultured;uncultured bacterium
g_test	ccp	New.ReferenceOTU1139	516.987	0	4	0.000918642	0.000764957	0	0.000145867	6.45172e-05	0	0	Bacteria;Proteobacteria;Epsilonproteobacteria;Campylobacterales;Helicobacteraceae;Sulfurimonas;uncultured epsilon proteobacterium
g_test	ccp	New.ReferenceOTU1933	510.968	0	4	0	0.00199829	0.00107082	7.05806e-06	9.21674e-06	0	0	Bacteria;Aquificae;Aquificae;Aquificales;Desulfurobacteriaceae;Desulfurobacterium
g_test	ccp	New.ReferenceOTU2295	500.892	0	6	0.000905329	0.000132014	6.26086e-05	0.00168923	0.000304153	5.50981e-06	0	Bacteria;Proteobacteria;Gammaproteobacteria;Thiotrichales;Piscirickettsiaceae;Thiomicrospira;uncultured gamma proteobacterium
g_test	ccp	New.ReferenceOTU2017	497.686	0	5	1.14117e-05	3.61682e-06	0	0.000150572	0.00128297	0	3.2203e-05	Bacteria;Proteobacteria;Gammaproteobacteria;Order Incertae Sedis;Family Incertae Sedis;Marinicella;uncultured bacterium
g_test	ccp	New.CleanUp.ReferenceOTU436199	493.941	0	4	0.000454566	0	0	2.35269e-06	5.53005e-06	0	8.05075e-05	Bacteria;Proteobacteria;Gammaproteobacteria;Alteromonadales;Colwelliaceae;Colwellia
g_test	ccp	New.ReferenceOTU1161	470.877	0	4	6.65683e-05	0	0	0.000145867	0.0016074	0	0.000418639	Bacteria;Proteobacteria;Gammaproteobacteria;Order Incertae Sedis;Family Incertae Sedis;Marinicella;uncultured bacterium
g_test	ccp	FJ628226.1.1466	464.487	0	5	0.000445056	0.000376149	7.7721e-05	0.00369372	0.000191708	0	0	Bacteria;Proteobacteria;Epsilonproteobacteria;Campylobacterales;Helicobacteraceae;Sulfurovum;uncultured bacterium
g_test	ccp	New.ReferenceOTU1385	453.06	0	4	0.000410821	1.80841e-06	0	2.35269e-06	7.37339e-06	0	0	Bacteria;Proteobacteria;Gammaproteobacteria;Thiotrichales;Piscirickettsiaceae;Thiomicrospira;uncultured gamma proteobacterium
g_test	ccp	FR853007.1.1516	450.261	0	5	0.000475488	5.42523e-06	5.1814e-05	3.05849e-05	2.21202e-05	0	0	Bacteria;Proteobacteria;Deltaproteobacteria;Desulfobacterales;Desulfobulbaceae;Desulfobulbus;uncultured delta proteobacterium
g_test	ccp	AB095133.1.1040	443.471	0	4	0	0.00124961	0.00196246	9.41075e-06	0	1.8366e-06	0	Archaea;Euryarchaeota;Halobacteria;Halobacteriales;Miscellaneous Euryarchaeotic Group(MEG);uncultured archaeon;uncultured archaeon
g_test	ccp	New.ReferenceOTU754	440.179	0	5	1.90195e-06	0	6.47675e-06	0.000936369	0.000409223	0	1.61015e-05	Bacteria;Proteobacteria;Gammaproteobacteria;Thiotrichales;Thiotrichaceae;uncultured;uncultured bacterium
g_test	ccp	New.CleanUp.ReferenceOTU23903	438.034	0	4	0	0	0	0.000421131	0.00080923	1.8366e-06	4.83045e-05	Bacteria;Proteobacteria;Alphaproteobacteria;Rhizobiales;Phyllobacteriaceae;Pseudahrensia;uncultured bacterium
g_test	ccp	New.CleanUp.ReferenceOTU203232	428.161	0	4	0.000439351	3.61682e-06	0	3.05849e-05	4.42404e-05	0	0	Bacteria;Bacteroidetes;Bacteroidia;Bacteroidales;Marinilabiaceae;uncultured
g_test	ccp	New.CleanUp.ReferenceOTU405768	421.464	0	4	3.8039e-06	0	2.15892e-06	0.00131986	7.37339e-05	0	0	Bacteria;Proteobacteria;Gammaproteobacteria;Methylococcales;Marine Methylotrophic Group 2
g_test	ccp	New.ReferenceOTU1165	418.423	0	5	0.000775996	0.000132014	4.31784e-05	0.00175746	5.34571e-05	0	0	Bacteria;Proteobacteria;Epsilonproteobacteria;Campylobacterales;Helicobacteraceae;Sulfurovum;uncultured bacterium
g_test	ccp	JQ712374.1.1378	412.774	0	4	0.000378488	3.61682e-06	2.15892e-06	9.41075e-06	0	0	0	Bacteria;Proteobacteria;Epsilonproteobacteria;Campylobacterales;Campylobacteraceae;Arcobacter;uncultured epsilon proteobacterium
g_test	ccp	New.ReferenceOTU2184	408.855	0	4	0.000100803	2.35093e-05	0	0.00198802	1.10601e-05	0	0	Bacteria;Bacteroidetes;Flavobacteriia;Flavobacteriales;Flavobacteriaceae
g_test	ccp	New.ReferenceOTU1374	407.607	0	4	0	0	0	1.17634e-05	0.00149127	0.000110196	0.0021898	Bacteria;Bacteroidetes;Flavobacteriia;Flavobacteriales;Flavobacteriaceae;Maritimimonas
g_test	ccp	New.ReferenceOTU446	400.487	0	4	0.00044886	0	8.63567e-06	2.58796e-05	0.000127191	0	0	Bacteria;Proteobacteria;Deltaproteobacteria;Desulfobacterales;Desulfobulbaceae;Desulfobulbus
g_test	ccp	New.ReferenceOTU781	399.467	0	4	0	0	0	4.23484e-05	0.00146546	1.8366e-06	0.0103211	Bacteria;Planctomycetes;Planctomycetacia;Planctomycetales;Planctomycetaceae;Bythopirellula;uncultured bacterium
g_test	ccp	DQ223020.1.1315	397.738	0	4	0	1.80841e-06	0	0	5.53005e-06	1.8366e-06	0.00896854	Bacteria;Proteobacteria;Alphaproteobacteria;Rhodobacterales;Rhodobacteraceae;Tateyamaria
g_test	ccp	New.ReferenceOTU1637	390.125	0	4	0.000648565	5.96775e-05	0	0.000959896	0.000287562	0	0	Unassigned
g_test	ccp	New.ReferenceOTU503	380.204	0	4	0.000403214	6.14859e-05	1.29535e-05	0	0	1.8366e-06	0	Bacteria;Proteobacteria;Epsilonproteobacteria;Campylobacterales;Helicobacteraceae;Sulfurovum;uncultured bacterium
g_test	ccp	New.ReferenceOTU1609	374.978	0	4	0.000349959	1.08505e-05	0	2.35269e-06	3.6867e-06	0	0	Bacteria;Proteobacteria;Deltaproteobacteria;Bdellovibrionales;Bdellovibrionaceae;Bdellovibrio;uncultured bacterium
g_test	ccp	New.CleanUp.ReferenceOTU634501	371.411	0	4	0	0	0	9.41075e-06	0.000949325	1.8366e-06	1.61015e-05	Bacteria;Bacteroidetes;Flavobacteriia;Flavobacteriales;Flavobacteriaceae;Lutibacter;uncultured Bacteroidetes bacterium
g_test	ccp	FN562851.1.1351	370.985	0	5	0.000606722	0.00108866	6.47675e-06	6.35225e-05	0	1.8366e-06	0	Bacteria;Proteobacteria;Epsilonproteobacteria;Campylobacterales;Helicobacteraceae;Sulfurovum;uncultured bacterium
g_test	ccp	HE576793.1.1403	370.941	0	5	0.000517331	1.62757e-05	0	0.000181157	0.00107099	1.8366e-06	0	Bacteria;Bacteroidetes;Flavobacteriia;Flavobacteriales;Flavobacteriaceae;uncultured;uncultured Bacteroidetes bacterium
g_test	ccp	FJ348469.1.1394	369.213	0	4	0	0	0	4.70537e-06	0.00131246	1.8366e-06	0.00228641	Bacteria;Bacteroidetes;Flavobacteriia;Flavobacteriales;Flavobacteriaceae
g_test	ccp	New.ReferenceOTU2402	368.92	0	5	1.90195e-05	3.61682e-06	0	0.000444658	0.00077052	5.50981e-06	0	Bacteria;Proteobacteria;Gammaproteobacteria;Thiotrichales;Piscirickettsiaceae;Thiomicrospira;uncultured gamma proteobacterium
g_test	ccp	New.CleanUp.ReferenceOTU934045	367.324	0	4	0.000329037	1.80841e-06	2.15892e-06	2.35269e-06	0	0	0	Bacteria;Proteobacteria;Epsilonproteobacteria;Campylobacterales;Helicobacteraceae;Sulfurimonas;uncultured bacterium
g_test	ccp	HM185888.1.1371	360.607	0	4	0	1.80841e-06	1.72713e-05	0	0	0.000958708	1.61015e-05	Bacteria;Proteobacteria;Gammaproteobacteria;Enterobacteriales;Enterobacteriaceae
g_test	ccp	New.ReferenceOTU36	349.422	0	5	0.000505919	1.98925e-05	8.63567e-05	0.000442305	4.79271e-05	0	0	Bacteria;BD1-5;uncultured bacterium;uncultured bacterium;uncultured bacterium;uncultured bacterium;uncultured bacterium
g_test	ccp	AF449231.1.1429	335.291	0	5	0.000346155	1.98925e-05	4.31784e-06	2.82322e-05	0	1.8366e-06	0	Bacteria;Proteobacteria;Epsilonproteobacteria;Campylobacterales;Helicobacteraceae;Sulfurovum;uncultured bacterium
g_test	ccp	FN562904.1.1341	327.23	0	4	5.32546e-05	5.42523e-06	0	0.00103989	0.000313369	0	0	Bacteria;Bacteroidetes;Flavobacteriia;Flavobacteriales;Flavobacteriaceae;uncultured;uncultured bacterium
g_test	ccp	New.ReferenceOTU2528	325.537	0	4	5.70585e-05	0.00113568	2.15892e-06	1.17634e-05	0	0	0	Bacteria;Proteobacteria;Epsilonproteobacteria;Campylobacterales;Helicobacteraceae;Sulfurimonas;uncultured bacterium
g_test	ccp	New.ReferenceOTU1434	317.936	0	7	4.18429e-05	3.61682e-06	2.15892e-06	0.000769328	0.000700472	8.44838e-05	0.000161015	Bacteria;Proteobacteria;Alphaproteobacteria;Rhodobacterales;Rhodobacteraceae;uncultured;uncultured bacterium
g_test	ccp	New.CleanUp.ReferenceOTU815040	317.082	0	4	1.90195e-06	3.61682e-06	0.000986626	2.35269e-06	0	0	0	Bacteria;Proteobacteria;Epsilonproteobacteria;Nautiliales;Nautiliaceae;Nitratifractor;uncultured bacterium
g_test	ccp	JQ712413.1.1383	316.976	0	5	0.000753172	0.00270176	2.15892e-06	0.00059523	6.26739e-05	0	0	Bacteria;Proteobacteria;Epsilonproteobacteria;Campylobacterales;Helicobacteraceae;Sulfurimonas;uncultured epsilon proteobacterium
g_test	ccp	AF367495.1.1329	314.608	0	6	0.00373733	0.0078051	3.67016e-05	0.00611228	0.00929232	3.67321e-06	0	Bacteria;Proteobacteria;Epsilonproteobacteria;Campylobacterales;Helicobacteraceae;Sulfurimonas;uncultured epsilon proteobacterium
g_test	ccp	New.ReferenceOTU389	313.575	0	5	8.55878e-05	5.60607e-05	2.15892e-06	0.00151748	0.000147468	0	0	Bacteria;Proteobacteria;Epsilonproteobacteria;Campylobacterales;Helicobacteraceae;Sulfurovum;uncultured bacterium
g_test	ccp	EF219007.1.1376	313.386	0	4	7.22741e-05	0.00116823	0	2.11742e-05	1.84335e-06	0	0	Bacteria;Proteobacteria;Epsilonproteobacteria;Campylobacterales;Helicobacteraceae;Sulfurimonas;uncultured bacterium
g_test	ccp	AB842286.1.1461	308.401	0	5	7.6078e-06	0	0	0.000214094	0.00100278	0.000168968	0.00887193	Bacteria;Verrucomicrobia;Verrucomicrobiae;Verrucomicrobiales;DEV007;uncultured bacterium;uncultured bacterium
g_test	ccp	JQ611102.1.1398	304.606	0	5	0.000694212	0.000224243	2.15892e-06	0.000785797	0.000234105	0	0	Bacteria;Bacteroidetes;Flavobacteriia;Flavobacteriales;Flavobacteriaceae;Lutibacter;uncultured bacterium
g_test	ccp	New.CleanUp.ReferenceOTU931727	303.577	0	6	1.90195e-06	0	1.07946e-05	0.00059523	0.000576968	9.18302e-06	0.00120761	Bacteria;Proteobacteria;Alphaproteobacteria;Rhodobacterales;Rhodobacteraceae;uncultured;uncultured bacterium
g_test	ccp	AB476196.1.1434	302.145	0	5	0.000232038	0.000294771	0.000615292	0.00189627	6.26739e-05	0	0	Bacteria;Proteobacteria;Epsilonproteobacteria;Campylobacterales;Helicobacteraceae;Sulfurovum;uncultured bacterium
g_test	ccp	New.ReferenceOTU881	293.825	0	5	0.000334743	9.22289e-05	2.15892e-06	0	1.84335e-06	1.46928e-05	0	Bacteria;Proteobacteria;Epsilonproteobacteria;Nautiliales;Nautiliaceae;uncultured;uncultured epsilon proteobacterium
g_test	ccp	New.ReferenceOTU1047	286.319	0	4	0.000684702	0.000338173	0.000604497	3.05849e-05	0	0	0	Bacteria;Aquificae;Aquificae;Aquificales;Desulfurobacteriaceae;Thermovibrio
g_test	ccp	AB476198.1.1452	280.131	0	5	1.90195e-06	3.61682e-06	1.72713e-05	0.000167041	0.000604618	0	0	Bacteria;Proteobacteria;Gammaproteobacteria;Thiotrichales;Thiotrichaceae;uncultured
g_test	ccp	EU107485.1.1485	279.51	0	4	0	0	0	7.99913e-05	0.00076499	1.8366e-06	0.000402538	Bacteria;Proteobacteria;Gammaproteobacteria;Thiotrichales;Thiotrichaceae;Thiothrix;uncultured bacterium
g_test	ccp	New.ReferenceOTU1871	277.283	0	4	0.00047739	0.000321897	0	9.88128e-05	2.39635e-05	0	0	Bacteria;Proteobacteria;Epsilonproteobacteria;Campylobacterales;Helicobacteraceae;Sulfurimonas
g_test	ccp	New.ReferenceOTU2573	276.678	0	4	2.66273e-05	0.000815593	0.00172066	0	0	1.8366e-06	0	Bacteria;Proteobacteria;Epsilonproteobacteria;Nautiliales;Nautiliaceae;Caminibacter;uncultured bacterium
g_test	ccp	New.ReferenceOTU2188	275.154	0	4	0.000251057	1.80841e-06	0	4.70537e-06	1.84335e-06	0	0	Bacteria;Proteobacteria;Deltaproteobacteria;Desulfobacterales;Desulfobulbaceae;Desulfobulbus;uncultured delta proteobacterium
g_test	ccp	AJ535243.1.1522	272.722	0	4	6.46663e-05	0	1.29535e-05	0.00117399	3.6867e-05	0	0	Bacteria;Proteobacteria;Deltaproteobacteria;Desulfobacterales;Desulfobulbaceae;uncultured
g_test	ccp	New.ReferenceOTU870	272.415	0	5	0	0	8.63567e-06	0.00012234	0.00076499	8.63204e-05	1.61015e-05	Bacteria;Proteobacteria;Gammaproteobacteria;Chromatiales;Ectothiorhodospiraceae;Acidiferrobacter;uncultured bacterium
g_test	ccp	JQ287298.1.1469	267.44	0	4	0.000412723	0.000690813	0	9.41075e-06	1.47468e-05	0	0	Bacteria;Proteobacteria;Epsilonproteobacteria;Campylobacterales;Campylobacteraceae;Sulfurospirillum;uncultured bacterium
g_test	ccp	New.ReferenceOTU1488	264.736	0	4	0	0	0	9.41075e-06	0.000777893	1.8366e-06	0.000386436	Bacteria;Proteobacteria;Alphaproteobacteria;DB1-14;uncultured bacterium;uncultured bacterium;uncultured bacterium
g_test	ccp	JX525515.1.1426	262.336	0	4	1.90195e-06	0	2.15892e-06	0.000444658	0.000337333	0	0	Bacteria;Bacteroidetes;Flavobacteriia;Flavobacteriales;Flavobacteriaceae;uncultured
g_test	ccp	New.ReferenceOTU2287	257.77	0	6	2.47254e-05	0	2.15892e-06	0.000708159	0.000392633	1.8366e-05	0.000273726	Bacteria;Proteobacteria;Alphaproteobacteria;Rhodobacterales;Rhodobacteraceae;uncultured;uncultured bacterium
g_test	ccp	New.ReferenceOTU2265	257.177	0	4	7.6078e-06	0	0.000829024	9.41075e-06	3.6867e-06	0	0	Bacteria;Proteobacteria;Epsilonproteobacteria;Nautiliales;Nautiliaceae;Nitratifractor;uncultured bacterium
g_test	ccp	New.CleanUp.ReferenceOTU92057	253.618	0	4	0	0	0	2.35269e-06	0.000707846	1.8366e-06	0.000177117	Bacteria;Bacteroidetes;Flavobacteriia;Flavobacteriales;Flavobacteriaceae
g_test	ccp	JX403051.1.1513	253.014	0	4	0.000359469	0.000343598	0	4.70537e-06	5.53005e-06	0	0	Bacteria;Proteobacteria;Epsilonproteobacteria;Campylobacterales;Helicobacteraceae;Sulfurovum;uncultured bacterium
g_test	ccp	AJ704703.1.1485	252.562	0	4	0	0	0	7.05806e-06	0.000683882	1.8366e-06	0.000112711	Bacteria;Bacteroidetes;Flavobacteriia;Flavobacteriales;Flavobacteriaceae
g_test	ccp	FN562878.1.1304	252.182	0	6	0.000625742	0.000222434	0.000427466	0.000414073	0.00044056	0	6.4406e-05	Bacteria;BD1-5;uncultured bacterium;uncultured bacterium;uncultured bacterium;uncultured bacterium;uncultured bacterium
g_test	ccp	New.ReferenceOTU985	248.307	0	5	2.28234e-05	0	0.000882997	3.05849e-05	5.53005e-06	1.8366e-06	0	Bacteria;Proteobacteria;Epsilonproteobacteria;Campylobacterales;Helicobacteraceae;Sulfurovum;uncultured epsilon proteobacterium
g_test	ccp	AY672499.1.1488	243.861	0	6	0.000414625	0.000578691	1.29535e-05	3.05849e-05	9.21674e-06	1.8366e-06	0	Bacteria;Proteobacteria;Epsilonproteobacteria;Campylobacterales;Helicobacteraceae;Sulfurovum;uncultured bacterium
g_test	ccp	AJ441200.1.1419	243.4	0	5	0.000365175	0.000840911	2.15892e-06	1.88215e-05	1.10601e-05	0	0	Bacteria;Proteobacteria;Epsilonproteobacteria;Campylobacterales;Helicobacteraceae;Sulfurimonas
g_test	ccp	EU775002.1.1308	243.296	0	4	0	0	8.63567e-06	0	1.84335e-06	0.000646485	1.61015e-05	Bacteria;Proteobacteria;Gammaproteobacteria;Enterobacteriales;Enterobacteriaceae;Escherichia-Shigella
g_test	ccp	New.ReferenceOTU126	242.936	0	4	0.000334743	3.61682e-06	0	0.000256443	0.000127191	0	0	Unassigned
g_test	ccp	New.ReferenceOTU1353	241.768	0	4	0.000699918	0.00124599	0.000395082	0	5.53005e-06	0	0	Bacteria;Proteobacteria;Deltaproteobacteria;Desulfurellales;Desulfurellaceae;Hippea
g_test	ccp	New.CleanUp.ReferenceOTU363246	239.988	0	4	7.6078e-05	0.000128397	0.00143136	7.05806e-06	0	0	0	Archaea;Nanoarchaeota;Nanoarchaeota Incertae Sedis;Unknown Order;Unknown Family;Nanoarchaeum;uncultured nanoarchaeote
g_test	ccp	AJ575988.1.1298	239.558	0	5	0.000329037	0	2.15892e-06	0.000103518	0.000267286	0	1.61015e-05	Bacteria;Bacteroidetes;Sphingobacteriia;Sphingobacteriales;WCHB1-69
g_test	ccp	New.ReferenceOTU1731	226.782	0	6	4.94507e-05	1.80841e-06	2.15892e-06	0.0002188	0.000643329	1.8366e-06	0	Bacteria;Proteobacteria;Gammaproteobacteria;Thiotrichales;Piscirickettsiaceae;Thiomicrospira;uncultured gamma proteobacterium
g_test	ccp	New.ReferenceOTU639	226.267	0	5	0.000367076	0.000748682	2.15892e-06	4.23484e-05	1.84335e-06	0	0	Bacteria;Proteobacteria;Epsilonproteobacteria;Campylobacterales;Helicobacteraceae;Sulfurovum;uncultured epsilon proteobacterium
g_test	ccp	New.CleanUp.ReferenceOTU886493	226.137	0	5	0.000329037	0.000920481	2.15892e-06	3.7643e-05	5.53005e-06	0	0	Bacteria;Proteobacteria;Epsilonproteobacteria;Campylobacterales;Helicobacteraceae;Sulfurimonas;uncultured bacterium
g_test	ccp	New.ReferenceOTU403	223.278	0	4	3.8039e-05	0.000806551	2.15892e-06	1.88215e-05	0	0	0	Bacteria;Proteobacteria;Epsilonproteobacteria;Campylobacterales;Helicobacteraceae;Sulfurimonas;uncultured bacterium
g_test	ccp	New.CleanUp.ReferenceOTU676157	222.381	0	4	1.90195e-06	0	8.63567e-06	0.000689337	3.87103e-05	0	0	Bacteria;Bacteroidetes;Sphingobacteriia;Sphingobacteriales;Chitinophagaceae;uncultured;uncultured bacterium
g_test	ccp	HM799090.1.1392	222.201	0	4	0	0	0	0.000237621	2.21202e-05	1.8366e-06	0.00719737	Bacteria;Proteobacteria;Alphaproteobacteria;Rhodobacterales;Rhodobacteraceae;Roseobacter clade NAC11-7 lineage;uncultured alpha proteobacterium
g_test	ccp	New.CleanUp.ReferenceOTU22432	220.61	0	4	0.000239646	0	4.74962e-05	1.17634e-05	1.65901e-05	0	0	Bacteria;Proteobacteria;Deltaproteobacteria;Desulfobacterales;Desulfobulbaceae;Desulfobulbus;uncultured bacterium
g_test	ccp	DQ270624.1.1491	219.94	0	4	0.000313822	5.42523e-06	0	0.000357608	8.29507e-05	0	0	Bacteria;Proteobacteria;Gammaproteobacteria;Thiotrichales;Piscirickettsiaceae;Thiomicrospira;uncultured gamma proteobacterium
g_test	ccp	New.CleanUp.ReferenceOTU1067318	217.106	0	4	0.000226332	1.80841e-05	0	9.41075e-06	7.37339e-06	0	0	Unassigned
g_test	ccp	GQ848454.1.1457	216.749	0	4	0	0	2.15892e-06	0.000689337	1.65901e-05	0	1.61015e-05	Bacteria;Proteobacteria;Epsilonproteobacteria;Campylobacterales;Helicobacteraceae;Sulfurimonas;uncultured epsilon proteobacterium
g_test	ccp	JQ287050.1.1446	214.304	0	4	0	0	0	1.88215e-05	0.000641485	4.59151e-05	3.2203e-05	Bacteria;Proteobacteria;Alphaproteobacteria;Rhizobiales;Phyllobacteriaceae;Pseudahrensia;uncultured bacterium
g_test	ccp	FJ535264.1.1335	214.083	0	5	5.70585e-06	1.80841e-06	4.31784e-06	0.000705806	4.79271e-05	0	0	Bacteria;Proteobacteria;Epsilonproteobacteria;Campylobacterales;Helicobacteraceae;Sulfurovum;uncultured bacterium
g_test	ccp	New.ReferenceOTU433	212.352	0	5	0.000336645	7.41448e-05	0	0.000105871	7.37339e-05	1.8366e-06	0	Bacteria;Proteobacteria;Gammaproteobacteria;Thiotrichales;Piscirickettsiaceae;Thiomicrospira;uncultured gamma proteobacterium
g_test	ccp	AB476234.1.1464	211.494	0	4	1.90195e-06	0	1.29535e-05	0.000609346	7.00472e-05	0	0	Bacteria;Proteobacteria;Gammaproteobacteria;Methylococcales;Marine Methylotrophic Group 2;uncultured bacterium;uncultured bacterium
g_test	ccp	FN562823.1.1291	209.991	0	4	0.000110313	1.80841e-05	0	0.00028938	0.000698629	0	0	Bacteria;Proteobacteria;Gammaproteobacteria;Thiotrichales;Thiotrichaceae;uncultured;uncultured bacterium
g_test	ccp	New.CleanUp.ReferenceOTU90435	207.983	0	4	4.37449e-05	0	0	5.64645e-05	0.000693099	1.8366e-06	0	Bacteria;Bacteroidetes;VC2,1 Bac22;uncultured bacterium;uncultured bacterium;uncultured bacterium;uncultured bacterium
g_test	ccp	New.ReferenceOTU242	205.034	0	4	0.000239646	0	2.80659e-05	7.29333e-05	2.39635e-05	0	0	Bacteria;Bacteroidetes;Sphingobacteriia;Sphingobacteriales;WCHB1-69;uncultured bacterium;uncultured bacterium
g_test	ccp	DQ270620.1.1452	204.489	0	4	0	0	2.15892e-06	3.7643e-05	0.000503234	3.67321e-06	0	Bacteria;Proteobacteria;Gammaproteobacteria;Methylococcales;IheB2-23;uncultured bacterium;uncultured bacterium
g_test	ccp	New.ReferenceOTU1897	201.174	0	4	0.000228234	5.60607e-05	0	4.70537e-06	3.6867e-06	0	0	Bacteria;Proteobacteria;Epsilonproteobacteria;Campylobacterales;Campylobacteraceae;Sulfurospirillum;uncultured bacterium
g_test	ccp	JQ611155.1.1358	197.692	0	4	0.000287195	0.000327322	0	2.35269e-06	5.53005e-06	0	0	Bacteria;Proteobacteria;Epsilonproteobacteria;Campylobacterales;Campylobacteraceae;Sulfurospirillum;uncultured bacterium
g_test	ccp	New.CleanUp.ReferenceOTU617032	192.599	0	4	0.000228234	3.9785e-05	0	3.05849e-05	1.84335e-06	0	0	Bacteria;Proteobacteria;Gammaproteobacteria;Thiotrichales;Piscirickettsiaceae;Thiomicrospira;uncultured gamma proteobacterium
g_test	ccp	New.ReferenceOTU440	192.564	0	4	1.90195e-05	3.25514e-05	0.000822548	0	1.84335e-06	0	0	Bacteria;Proteobacteria;Epsilonproteobacteria;Campylobacterales;Campylobacteraceae;Campylobacter;uncultured epsilon proteobacterium
g_test	ccp	KF545063.1.1478	190.146	0	5	3.8039e-06	3.61682e-06	1.29535e-05	0.000585819	6.63605e-05	0	0	Bacteria;Proteobacteria;Epsilonproteobacteria;Campylobacterales;Helicobacteraceae;Sulfurovum;uncultured Sulfurovum sp,
g_test	ccp	New.ReferenceOTU1309	186.23	0	4	1.90195e-06	3.61682e-06	0	0.000383488	0.000210142	0	0	Bacteria;Bacteroidetes;Flavobacteriia;Flavobacteriales;Flavobacteriaceae;uncultured;uncultured bacterium
g_test	ccp	FJ792191.1.1357	184.669	0	5	1.33137e-05	1.80841e-06	8.63567e-06	0.000487006	0.000180648	0	0	Bacteria;Bacteroidetes;Sphingobacteriia;Sphingobacteriales;Chitinophagaceae;uncultured;uncultured bacterium
g_test	ccp	GQ261309.1.1421	183.436	0	5	3.8039e-06	5.42523e-06	1.72713e-05	0.000155277	0.000388947	0	0	Bacteria;Proteobacteria;Epsilonproteobacteria;Campylobacterales;Helicobacteraceae;Sulfurovum;uncultured epsilon proteobacterium
g_test	ccp	New.ReferenceOTU2419	183.366	0	4	0.000235842	3.61682e-06	0.000155442	0	0	1.8366e-06	0	Bacteria;Proteobacteria;Epsilonproteobacteria;Nautiliales;Nautiliaceae;Caminibacter
g_test	ccp	New.ReferenceOTU1277	180.347	0	4	0.000150254	2.89346e-05	0	0.000432894	0.000540101	0	0	Unassigned
g_test	ccp	New.ReferenceOTU1118	180.042	0	4	0	0	0	7.05806e-06	0.000595402	1.8366e-06	0.000692365	Bacteria;Planctomycetes;Planctomycetacia;Planctomycetales;Planctomycetaceae;Pirellula
g_test	ccp	AB095131.1.1049	176.819	0	4	0.000543958	0.00150279	0.000429625	4.70537e-06	0	0	0	Archaea;Euryarchaeota;Archaeoglobi;Archaeoglobales;Archaeoglobaceae;uncultured;uncultured archaeon
g_test	ccp	New.ReferenceOTU1002	176.538	0	4	3.8039e-06	0	1.07946e-05	0.000543471	4.97704e-05	0	0	Bacteria;Bacteroidetes;Flavobacteriia;Flavobacteriales;Flavobacteriaceae
g_test	ccp	JX526682.1.1430	175.97	0	4	0	0	0	3.05849e-05	0.000444247	1.8366e-06	3.2203e-05	Bacteria;Bacteroidetes;Flavobacteriia;Flavobacteriales;Cryomorphaceae;Crocinitomix;uncultured bacterium
g_test	ccp	FN553958.1.1484	174.361	0	5	0.00038039	0.000132014	1.29535e-05	0.00103283	0.000134564	0	0	Bacteria;Proteobacteria;Epsilonproteobacteria;Campylobacterales;Helicobacteraceae;Sulfurimonas
g_test	ccp	KF746349.99245.100735	169.661	0	4	1.90195e-06	0	8.63567e-06	0	1.84335e-06	0.000483027	0	Bacteria;Cyanobacteria;Chloroplast;uncultured bacterium;uncultured bacterium;uncultured bacterium;uncultured bacterium
g_test	ccp	New.ReferenceOTU330	168.073	0	4	3.04312e-05	3.61682e-06	0	0.000712864	3.50236e-05	0	0	Bacteria;Proteobacteria;Epsilonproteobacteria;Campylobacterales;Helicobacteraceae;Sulfurimonas;uncultured bacterium
g_test	ccp	FJ535253.1.1337	166.192	0	4	7.6078e-06	5.42523e-06	0	0.000635225	7.37339e-06	0	0	Bacteria;Proteobacteria;Epsilonproteobacteria;Campylobacterales;Helicobacteraceae;Sulfurimonas;uncultured epsilon proteobacterium
g_test	ccp	HQ153866.1.1384	164.783	0	5	0.000247254	0.000224243	8.63567e-06	7.05806e-06	1.84335e-06	0	0	Bacteria;Proteobacteria;Epsilonproteobacteria;Campylobacterales;Helicobacteraceae;Sulfurovum;uncultured bacterium
g_test	ccp	New.CleanUp.ReferenceOTU825255	161.676	0	4	0.000285293	0.000222434	0	6.11698e-05	9.21674e-06	0	0	Unassigned
g_test	ccp	AB611366.1.906	161.144	0	4	4.94507e-05	0.000130206	0.00103196	4.70537e-06	0	0	0	Archaea;Nanoarchaeota;Nanoarchaeota Incertae Sedis;Unknown Order;Unknown Family;Nanoarchaeum;uncultured nanoarchaeote
g_test	ccp	FN553949.1.1479	159.628	0	4	0	0	0	2.35269e-06	0.000558535	3.67321e-06	0.00460503	Bacteria;Bacteroidetes;Cytophagia;Cytophagales;Flammeovirgaceae;uncultured;uncultured bacterium
g_test	ccp	New.CleanUp.ReferenceOTU223912	156.057	0	5	3.04312e-05	3.61682e-06	4.31784e-06	0.000343492	0.000285719	0	0	Bacteria;Bacteroidetes;Flavobacteriia;Flavobacteriales;Cryomorphaceae;Fluviicola
g_test	ccp	JQ287089.1.1471	153.415	0	5	0.000102705	3.61682e-06	0	0.000806971	4.05537e-05	0	4.83045e-05	Bacteria;Proteobacteria;Epsilonproteobacteria;Campylobacterales;Helicobacteraceae;Sulfurovum;uncultured bacterium
g_test	ccp	New.CleanUp.ReferenceOTU301769	150.154	0	4	0	0	0	7.05806e-06	0.000475584	1.8366e-06	0.000418639	Unassigned
g_test	ccp	AB193955.1.1475	148.894	0	4	0	0	1.51124e-05	0.000348198	0.000101384	1.8366e-06	0	Bacteria;Proteobacteria;Epsilonproteobacteria;Campylobacterales;Helicobacteraceae;Sulfurovum;uncultured bacterium
g_test	ccp	New.ReferenceOTU2248	145.491	0	4	0	0	0	2.35269e-06	0.000442404	0.000343445	0.00170676	Bacteria;Bacteroidetes;Cytophagia;Cytophagales;Flammeovirgaceae;Reichenbachiella;uncultured bacterium
g_test	ccp	New.ReferenceOTU750	145.402	0	4	0	1.80841e-06	0	0.000265854	0.000276502	0	0.000547451	Bacteria;Proteobacteria;Alphaproteobacteria;Rhodobacterales;Rhodobacteraceae;uncultured;uncultured bacterium
g_test	ccp	AY531590.1.1473	142.406	0	4	1.90195e-06	0	0.000449055	0	1.47468e-05	3.67321e-06	0	Bacteria;Proteobacteria;Epsilonproteobacteria;Campylobacterales;Campylobacteraceae;Campylobacter;uncultured bacterium
g_test	ccp	New.CleanUp.ReferenceOTU407076	139.546	0	4	0.000201607	0.000260411	2.15892e-06	2.35269e-06	0	0	0	Bacteria;Proteobacteria;Epsilonproteobacteria;Campylobacterales;Campylobacteraceae;Thiofractor;uncultured bacterium
g_test	ccp	AB842287.1.1428	132.929	0	4	0.00014645	1.44673e-05	0	7.05806e-06	9.21674e-06	0	0	Bacteria;Proteobacteria;Epsilonproteobacteria;Campylobacterales;Helicobacteraceae;Sulfurovum;uncultured bacterium
g_test	ccp	AY672518.1.1495	132.593	0	4	0.000193999	5.42523e-06	0.000261229	2.35269e-06	0	0	0	Bacteria;Proteobacteria;Epsilonproteobacteria;Campylobacterales;Helicobacteraceae;Sulfurovum;uncultured epsilon proteobacterium
g_test	ccp	New.ReferenceOTU46	131.392	0	6	0.000114117	9.04205e-06	2.15892e-06	0.000228211	0.000422127	3.67321e-06	0	Bacteria;Proteobacteria;Gammaproteobacteria;Thiotrichales;Piscirickettsiaceae;Thiomicrospira;uncultured gamma proteobacterium
g_test	ccp	AY548973.1.1343	130.217	0	5	0.000182587	8.49953e-05	3.23838e-05	0.00103753	5.53005e-06	0	0	Bacteria;Proteobacteria;Epsilonproteobacteria;Campylobacterales;Campylobacteraceae;Sulfurospirillum;uncultured bacterium
g_test	ccp	JN874221.1.1469	129.487	0	5	0.000669487	0.000837294	0.000727555	0.00195508	0.000105071	0	0	Bacteria;Proteobacteria;Epsilonproteobacteria;Campylobacterales;Helicobacteraceae;Sulfurovum;uncultured bacterium
g_test	ccp	AJ441204.1.1419	128.985	0	4	1.71176e-05	0	2.15892e-06	0.000515238	1.65901e-05	0	0	Bacteria;Proteobacteria;Epsilonproteobacteria;Campylobacterales;Helicobacteraceae;Sulfurovum;uncultured bacterium
g_test	ccp	New.ReferenceOTU953	127.487	0	4	0	1.80841e-06	0	6.82279e-05	0.000285719	0	1.61015e-05	Bacteria;Proteobacteria;Gammaproteobacteria;Order Incertae Sedis;Family Incertae Sedis;Marinicella;uncultured bacterium
g_test	ccp	New.CleanUp.ReferenceOTU1069314	125.17	0	4	0.000192097	0.000115738	0	3.05849e-05	1.84335e-06	0	0	Bacteria;Proteobacteria;Gammaproteobacteria;Thiotrichales;Piscirickettsiaceae;Thiomicrospira;uncultured bacterium
g_test	ccp	New.ReferenceOTU1092	124.118	0	5	0.00022443	3.25514e-05	0	0.000164688	0.000138251	1.8366e-06	0	Bacteria;Proteobacteria;Gammaproteobacteria;Thiotrichales;Piscirickettsiaceae;Thiomicrospira;uncultured gamma proteobacterium
g_test	ccp	New.ReferenceOTU106	118.078	0	4	0.000163568	0.000108505	4.31784e-06	4.70537e-06	0	0	0	Bacteria;Proteobacteria;Epsilonproteobacteria;Campylobacterales;Helicobacteraceae;Sulfurovum;uncultured bacterium
g_test	ccp	EU652527.1.1506	111.013	0	4	0	3.61682e-06	0	0	1.84335e-06	1.8366e-06	0.00249573	Bacteria;Proteobacteria;Gammaproteobacteria;Xanthomonadales;JTB255 marine benthic group;uncultured bacterium;uncultured bacterium
g_test	ccp	New.ReferenceOTU1354	110.558	0	7	0.000152156	1.26589e-05	1.94303e-05	7.05806e-06	3.87103e-05	3.67321e-06	1.61015e-05	Bacteria;Proteobacteria;Epsilonproteobacteria;Campylobacterales;Helicobacteraceae;Sulfurovum;uncultured epsilon proteobacterium
g_test	ccp	New.CleanUp.ReferenceOTU331555	109.383	0	4	0	1.80841e-06	0	3.52903e-05	0.000265442	0	1.61015e-05	Bacteria;Proteobacteria;Gammaproteobacteria;Order Incertae Sedis;Family Incertae Sedis;Marinicella;uncultured bacterium
g_test	ccp	New.CleanUp.ReferenceOTU815228	107.526	0	4	7.6078e-06	1.80841e-06	0	0.00041172	1.29034e-05	0	0	Bacteria;Bacteroidetes;Flavobacteriia;Flavobacteriales;Flavobacteriaceae;Lutibacter;uncultured bacterium
g_test	ccp	AY355296.1.1417	105.296	0	5	0.000144548	1.62757e-05	6.47675e-05	2.35269e-06	1.84335e-06	0	0	Bacteria;Proteobacteria;Epsilonproteobacteria;Nautiliales;Nautiliaceae;Nitratifractor;uncultured bacterium
g_test	ccp	FJ535273.1.1334	103.92	0	5	1.14117e-05	3.25514e-05	0.000142489	0.00035055	1.84335e-05	0	0	Bacteria;Proteobacteria;Epsilonproteobacteria;Campylobacterales;Helicobacteraceae;Sulfurovum;uncultured bacterium
g_test	ccp	AB176113.1.1296	103.089	0	5	3.8039e-05	1.80841e-06	2.15892e-06	0.000190568	0.000252539	0	0	Bacteria;Proteobacteria;Epsilonproteobacteria;Campylobacterales;Helicobacteraceae;Sulfurimonas;uncultured bacterium
g_test	ccp	New.CleanUp.ReferenceOTU229444	101.723	0	4	0	0	0	8.70494e-05	0.000226732	1.8366e-06	9.6609e-05	Bacteria;Proteobacteria;Deltaproteobacteria;Bdellovibrionales;Bdellovibrionaceae;OM27 clade;uncultured bacterium
g_test	ccp	New.ReferenceOTU226	100.317	0	4	0.000116019	1.26589e-05	1.72713e-05	2.35269e-06	0	0	0	Bacteria;Proteobacteria;Epsilonproteobacteria;Nautiliales;Nautiliaceae;Caminibacter
g_test	ccp	New.CleanUp.ReferenceOTU650884	97.9749	0	4	0	0	1.51124e-05	0.00035055	6.63605e-05	0	0.00064406	Bacteria;Bacteroidetes;Flavobacteriia;Flavobacteriales;Flavobacteriaceae
g_test	ccp	KF465246.1.1307	97.5983	0	4	0.000116019	1.80841e-05	2.15892e-06	1.64688e-05	0	0	0	Bacteria;Proteobacteria;Epsilonproteobacteria;Campylobacterales;Helicobacteraceae;Sulfurovum;uncultured bacterium
g_test	ccp	New.CleanUp.ReferenceOTU813257	96.5868	0	4	1.90195e-06	0	6.47675e-06	0.000308202	1.84335e-05	0	0	Bacteria;Proteobacteria;Gammaproteobacteria;Thiotrichales;Piscirickettsiaceae;Thiomicrospira;uncultured gamma proteobacterium
g_test	ccp	New.ReferenceOTU1513	96.2818	0	4	0	7.23364e-06	2.15892e-06	0.000282322	4.60837e-05	0	0	Bacteria;Proteobacteria;Gammaproteobacteria;Thiotrichales;Piscirickettsiaceae;Thiomicrospira;uncultured gamma proteobacterium
g_test	ccp	JF495273.1.1400	95.3787	0	5	0.000127431	7.23364e-06	8.63567e-06	2.35269e-05	3.87103e-05	0	0	Bacteria;Proteobacteria;Epsilonproteobacteria;Campylobacterales;Helicobacteraceae;Sulfurovum;uncultured bacterium
g_test	ccp	New.CleanUp.ReferenceOTU157005	92.7166	0	4	0.000157862	1.62757e-05	0	0.000167041	0.000108758	0	0	Bacteria;BD1-5
g_test	ccp	GQ848466.1.1517	90.9095	0	5	0.000106509	3.61682e-06	0	1.64688e-05	7.37339e-06	0	4.83045e-05	Bacteria;Proteobacteria;Gammaproteobacteria;Alteromonadales;Colwelliaceae;Colwellia;uncultured bacterium
g_test	ccp	New.ReferenceOTU2526	90.5409	0	4	9.69995e-05	5.42523e-06	0	2.35269e-06	9.21674e-06	0	0	Bacteria;Proteobacteria;Epsilonproteobacteria;Campylobacterales;Helicobacteraceae;Sulfurovum;uncultured bacterium
g_test	ccp	GU291345.1.1506	89.6407	0	4	3.8039e-06	0	0	5.17591e-05	0.0003742	0.000273654	0	Bacteria;Proteobacteria;Deltaproteobacteria;Desulfuromonadales;Desulfuromonadaceae;Desulfuromusa;uncultured bacterium
g_test	ccp	FR852934.1.922	88.6925	0	4	0.000119823	1.80841e-06	0.000105787	0	3.6867e-06	0	0	Archaea;Euryarchaeota;Thermoplasmata;Thermoplasmatales;Deep Sea Hydrothermal Vent Gp 2(DHVEG-2);uncultured archaeon;uncultured archaeon
g_test	ccp	KF799071.1.1479	85.8761	0	4	0.000116019	1.80841e-06	0	4.23484e-05	5.71438e-05	0	0	Bacteria;Bacteroidetes;Flavobacteriia;Flavobacteriales;Cryomorphaceae;Owenweeksia;uncultured bacterium
g_test	ccp	New.CleanUp.ReferenceOTU52031	84.7587	0	4	0.000270077	0.000213392	0	3.52903e-05	0.000827664	0	0	Bacteria;BD1-5;uncultured bacterium;uncultured bacterium;uncultured bacterium;uncultured bacterium;uncultured bacterium
g_test	ccp	EU050908.1.1396	83.3151	0	4	3.8039e-06	0	0	0.000141161	0.000180648	0	0.00328471	Bacteria;Bacteroidetes;Cytophagia;Cytophagales;Flammeovirgaceae;Reichenbachiella;uncultured bacterium
g_test	ccp	New.CleanUp.ReferenceOTU132971	83.0045	0	4	8.55878e-05	3.61682e-06	0	4.70537e-06	3.6867e-06	0	0	Bacteria;Proteobacteria;Gammaproteobacteria;Thiotrichales;Piscirickettsiaceae;Thiomicrospira;uncultured bacterium
g_test	ccp	FM179903.1.1493	81.9297	0	4	0	0	2.15892e-06	0.000228211	3.6867e-05	1.8366e-06	0	Bacteria;Proteobacteria;Gammaproteobacteria;Methylococcales;Marine Methylotrophic Group 2;uncultured bacterium;uncultured bacterium
g_test	ccp	New.ReferenceOTU1467	77.3448	0	4	0.000116019	9.04205e-06	0	7.05806e-05	0.000224889	0	0	Bacteria;Bacteroidetes;Flavobacteriia;Flavobacteriales;Flavobacteriaceae;uncultured;uncultured Bacteroidetes bacterium
g_test	ccp	EU050905.1.1397	76.0701	0	4	3.8039e-06	1.80841e-06	0	0.000134103	0.000127191	0	0	Bacteria;Bacteroidetes;Flavobacteriia;Flavobacteriales;Cryomorphaceae;Crocinitomix;uncultured bacterium
g_test	ccp	New.CleanUp.ReferenceOTU774117	75.3255	0	4	9.12936e-05	1.80841e-06	0	2.58796e-05	1.65901e-05	0	0	Unassigned
g_test	ccp	JQ712429.1.1383	74.8901	0	4	1.90195e-06	1.80841e-06	0	2.35269e-06	0.000215672	0	0	Bacteria;Bacteroidetes;Flavobacteriia;Flavobacteriales;NS9 marine group
g_test	ccp	HQ153979.1.1370	74.6786	1.65636e-16	5	0.000135038	0.000112121	1.07946e-05	2.35269e-06	1.65901e-05	0	0	Bacteria;Proteobacteria;Epsilonproteobacteria;Campylobacterales;Helicobacteraceae;Sulfurovum;uncultured bacterium
g_test	ccp	New.CleanUp.ReferenceOTU549037	74.4837	1.65636e-16	4	0.000135038	1.98925e-05	0	0.000190568	2.39635e-05	0	0	Unassigned
g_test	ccp	New.CleanUp.ReferenceOTU859632	74.1816	1.65636e-16	4	1.90195e-06	0	0	0.000244679	2.39635e-05	1.8366e-06	0	Bacteria;Proteobacteria;Epsilonproteobacteria;Campylobacterales;Helicobacteraceae;Sulfurovum;uncultured bacterium
g_test	ccp	New.ReferenceOTU2187	73.8021	1.65636e-16	5	9.31956e-05	1.80841e-06	0	7.05806e-06	1.29034e-05	0	0.000112711	Bacteria;Proteobacteria;Gammaproteobacteria;Alteromonadales;Colwelliaceae;Colwellia
g_test	ccp	KC001528.1.1315	72.7652	1.65636e-16	4	1.90195e-06	1.80841e-06	0	1.41161e-05	0.000200925	0	0	Bacteria;Proteobacteria;Alphaproteobacteria;Rhodobacterales;Rhodobacteraceae
g_test	ccp	New.CleanUp.ReferenceOTU429020	72.4437	3.30509e-16	4	7.6078e-06	0	0	4.70537e-05	0.000228575	1.10196e-05	0	Bacteria;Proteobacteria;Deltaproteobacteria;Desulfobacterales;Desulfobulbaceae;Desulfobulbus;uncultured bacterium
g_test	ccp	New.CleanUp.ReferenceOTU695425	71.5272	4.93489e-16	4	9.50975e-05	1.80841e-06	0	5.17591e-05	0.000195395	0	0	Bacteria;Bacteroidetes;Flavobacteriia;Flavobacteriales;Cryomorphaceae;Owenweeksia;uncultured bacterium
g_test	ccp	New.ReferenceOTU2233	71.0707	4.93489e-16	4	0.000315724	0.000553373	0	0.00167041	0.000121661	0	0	Bacteria;Proteobacteria;Epsilonproteobacteria;Campylobacterales;Helicobacteraceae;Sulfurimonas;uncultured bacterium
g_test	ccp	HM481300.1.1434	70.6729	6.54981e-16	5	1.52156e-05	0.000303813	0	4.70537e-06	1.84335e-05	0	1.61015e-05	Bacteria;Proteobacteria;Epsilonproteobacteria;Campylobacterales;Helicobacteraceae;Sulfurimonas;uncultured bacterium
g_test	ccp	JN662118.1.1367	70.5262	6.54981e-16	5	0.000123627	9.22289e-05	0.000200779	0.000465832	4.42404e-05	0	0	Bacteria;Proteobacteria;Epsilonproteobacteria;Campylobacterales;Helicobacteraceae;Sulfurovum;uncultured epsilon proteobacterium
g_test	ccp	New.CleanUp.ReferenceOTU829988	69.7128	1.14101e-15	4	1.33137e-05	0	6.47675e-06	0.000287028	1.10601e-05	0	0	Bacteria;Proteobacteria;Epsilonproteobacteria;Campylobacterales;Helicobacteraceae;Sulfurovum;uncultured bacterium
g_test	ccp	New.ReferenceOTU2533	69.5842	1.14101e-15	4	0.000220626	0.000320089	0	0.000134103	2.02768e-05	0	0	Bacteria;Proteobacteria;Epsilonproteobacteria;Campylobacterales;Helicobacteraceae;Sulfurovum;uncultured bacterium
g_test	ccp	New.ReferenceOTU2000	68.4399	1.95158e-15	5	9.12936e-05	5.42523e-06	1.94303e-05	7.05806e-06	2.21202e-05	0	0	Bacteria;Proteobacteria;Epsilonproteobacteria;Campylobacterales;Helicobacteraceae;Sulfurovum;uncultured epsilon proteobacterium
g_test	ccp	New.CleanUp.ReferenceOTU366342	67.7068	2.92074e-15	4	0	0	0	6.58752e-05	0.000178805	1.8366e-06	0.000273726	Bacteria;Proteobacteria;Alphaproteobacteria;DB1-14;uncultured bacterium;uncultured bacterium;uncultured bacterium
g_test	ccp	EF441910.1.1412	67.2752	3.56174e-15	5	0.000108411	5.42523e-06	0	0.000145867	3.6867e-06	3.67321e-06	0	Bacteria;Proteobacteria;Epsilonproteobacteria;Campylobacterales;Campylobacteraceae;Arcobacter;uncultured epsilon proteobacterium
g_test	ccp	EU555124.1.1480	66.4045	5.4921e-15	5	1.90195e-06	3.61682e-06	2.37481e-05	1.64688e-05	0.000167745	0	0	Bacteria;Proteobacteria;Gammaproteobacteria;Thiotrichales;Thiotrichaceae;uncultured;uncultured bacterium
g_test	ccp	KF545024.1.1481	65.8415	7.25263e-15	6	5.70585e-06	5.42523e-06	8.63567e-06	0.000242327	3.6867e-05	3.67321e-06	0	Bacteria;Proteobacteria;Epsilonproteobacteria;Campylobacterales;Helicobacteraceae;Sulfurovum;uncultured bacterium
g_test	ccp	New.ReferenceOTU993	65.6575	8.0404e-15	4	8.93917e-05	0.000155523	0	0	0	5.50981e-06	1.61015e-05	Bacteria;Proteobacteria;Epsilonproteobacteria;Nautiliales;Nautiliaceae;Caminibacter;uncultured bacterium
g_test	ccp	FJ001805.1.1397	63.9793	1.84516e-14	4	0.000112215	9.22289e-05	0	9.41075e-06	1.29034e-05	0	0	Bacteria;BD1-5;uncultured bacterium;uncultured bacterium;uncultured bacterium;uncultured bacterium;uncultured bacterium
g_test	ccp	New.ReferenceOTU1794	63.757	2.06516e-14	4	7.22741e-05	0.000267645	6.47675e-06	0	0	3.67321e-06	0	Bacteria;Proteobacteria;Epsilonproteobacteria;Nautiliales;Nautiliaceae;Caminibacter;uncultured bacterium
g_test	ccp	FJ535261.1.1343	62.8967	3.16273e-14	6	8.36858e-05	9.04205e-06	4.31784e-06	2.11742e-05	5.53005e-06	1.8366e-06	0	Bacteria;Proteobacteria;Epsilonproteobacteria;Campylobacterales;Helicobacteraceae;Sulfurovum;uncultured bacterium
g_test	ccp	New.CleanUp.ReferenceOTU1088457	62.1128	4.6698e-14	6	0.00016547	6.14859e-05	2.15892e-06	7.05806e-05	0.000200925	7.34642e-06	0	Bacteria;Proteobacteria;Gammaproteobacteria;Thiotrichales;Piscirickettsiaceae;Thiomicrospira;uncultured gamma proteobacterium
g_test	ccp	New.CleanUp.ReferenceOTU986809	59.7551	1.51551e-13	4	0.000116019	8.68037e-05	0	0	3.31803e-05	1.8366e-06	0	Bacteria;Proteobacteria;Epsilonproteobacteria;Campylobacterales;Helicobacteraceae;Sulfurimonas;uncultured bacterium
g_test	ccp	New.ReferenceOTU478	59.6934	1.55976e-13	4	0	0	0	3.05849e-05	0.000129034	1.8366e-06	0.00204489	Bacteria;Proteobacteria;Alphaproteobacteria;OCS116 clade;uncultured bacterium;uncultured bacterium;uncultured bacterium
g_test	ccp	JQ033738.1.1381	59.254	1.93788e-13	4	6.84702e-05	3.61682e-06	0	1.64688e-05	1.84335e-06	0	0	Bacteria;Proteobacteria;Epsilonproteobacteria;Campylobacterales;Helicobacteraceae;Sulfurovum;uncultured epsilon proteobacterium
g_test	ccp	EF218989.1.1378	58.3487	3.04101e-13	4	3.8039e-06	0	6.47675e-06	0.000162335	4.42404e-05	0	0	Bacteria;Proteobacteria;Epsilonproteobacteria;Campylobacterales;Helicobacteraceae;Sulfurovum;uncultured bacterium
g_test	ccp	New.CleanUp.ReferenceOTU342190	57.2524	5.24899e-13	4	1.33137e-05	0	4.31784e-06	0.000171746	6.63605e-05	0	0	Bacteria;Proteobacteria;Epsilonproteobacteria;Campylobacterales;Helicobacteraceae;Sulfurovum;uncultured epsilon proteobacterium
g_test	ccp	EU265970.1.1470	57.161	5.48126e-13	6	0.000184489	0.000171799	0	0.000112929	4.79271e-05	1.8366e-06	1.61015e-05	Bacteria;Proteobacteria;Epsilonproteobacteria;Campylobacterales;Helicobacteraceae;Sulfurimonas;uncultured bacterium
g_test	ccp	New.ReferenceOTU2307	56.1291	9.16358e-13	5	9.31956e-05	0.000763149	0.000371334	4.70537e-06	1.29034e-05	0	0	Bacteria;Proteobacteria;Epsilonproteobacteria;Nautiliales;Nautiliaceae;Nitratifractor
g_test	ccp	New.ReferenceOTU360	54.2032	2.39496e-12	5	8.36858e-05	3.61682e-06	0	9.88128e-05	0.000151155	7.34642e-06	0	Bacteria;Proteobacteria;Gammaproteobacteria;Thiotrichales;Piscirickettsiaceae;Thiomicrospira;uncultured gamma proteobacterium
g_test	ccp	New.ReferenceOTU2436	52.1134	6.79422e-12	4	6.27644e-05	1.08505e-05	4.31784e-06	4.70537e-06	0	0	0	Bacteria;Proteobacteria;Epsilonproteobacteria;Campylobacterales;Campylobacteraceae;Thiofractor;uncultured bacterium
g_test	ccp	FN562906.1.1359	50.4728	1.53976e-11	4	7.6078e-06	0	0	1.41161e-05	0.000173275	0	3.2203e-05	Bacteria;Bacteroidetes;Flavobacteriia;Flavobacteriales;Flavobacteriaceae;uncultured Bacteroidetes bacterium;uncultured Bacteroidetes bacterium
g_test	ccp	HE610326.1.1515	47.8166	5.79803e-11	4	6.84702e-05	0	0	9.64601e-05	6.63605e-05	1.8366e-06	0	Bacteria;Fusobacteria;Fusobacteriia;Fusobacteriales;Fusobacteriaceae;Psychrilyobacter
g_test	ccp	DQ925875.1.1395	45.9462	1.47403e-10	4	3.8039e-06	0.000153715	2.15892e-06	0	1.84335e-06	0	0	Bacteria;Proteobacteria;Epsilonproteobacteria;Campylobacterales;Campylobacteraceae;Campylobacter;uncultured epsilon proteobacterium
g_test	ccp	New.CleanUp.ReferenceOTU495270	44.7182	2.71787e-10	4	5.89605e-05	1.44673e-05	8.63567e-06	2.35269e-06	0	0	0	Bacteria;Proteobacteria;Epsilonproteobacteria;Campylobacterales;Helicobacteraceae;Sulfurovum
g_test	ccp	FR853018.1.1522	44.6224	2.84502e-10	4	1.90195e-06	0	7.55621e-05	2.35269e-06	6.45172e-05	0	0	Bacteria;Proteobacteria;Deltaproteobacteria;Desulfobacterales;Desulfobacteraceae;SEEP-SRB1
g_test	ccp	JN662291.1.1312	42.5955	7.82153e-10	5	4.56468e-05	1.80841e-06	2.15892e-06	2.35269e-06	1.84335e-06	0	0	Bacteria;Proteobacteria;Epsilonproteobacteria;Campylobacterales;Helicobacteraceae;Sulfurovum;uncultured bacterium
g_test	ccp	AY704397.1.1475	42.4474	8.4043e-10	4	2.66273e-05	0	2.15892e-06	7.29333e-05	0.000112444	0	0	Bacteria;Proteobacteria;Epsilonproteobacteria;Campylobacterales;Helicobacteraceae;Sulfurimonas;uncultured epsilon proteobacterium
g_test	ccp	DQ071289.1.1344	41.2319	1.54003e-09	6	0.000116019	0.000406892	2.15892e-06	9.88128e-05	1.84335e-05	3.67321e-06	0	Bacteria;Proteobacteria;Epsilonproteobacteria;Campylobacterales;Campylobacteraceae;Arcobacter;uncultured epsilon proteobacterium
g_test	ccp	AF449243.1.1429	38.8039	5.17408e-09	5	9.50975e-06	9.04205e-06	3.67016e-05	6.82279e-05	8.4794e-05	0	0	Bacteria;Proteobacteria;Epsilonproteobacteria;Campylobacterales;Helicobacteraceae;Sulfurovum;uncultured epsilon proteobacterium
g_test	ccp	FJ628247.1.1501	38.5478	5.86831e-09	5	3.8039e-06	0	0	0.000167041	2.02768e-05	5.50981e-06	4.83045e-05	Bacteria;Proteobacteria;Gammaproteobacteria;Oceanospirillales;SUP05 cluster;uncultured gamma proteobacterium;uncultured gamma proteobacterium
g_test	ccp	New.ReferenceOTU1978	38.525	5.92281e-09	5	3.8039e-06	1.80841e-06	6.47675e-06	6.35225e-05	7.55773e-05	0	0	Bacteria;Proteobacteria;Epsilonproteobacteria;Campylobacterales;Helicobacteraceae;Sulfurovum;uncultured bacterium
g_test	ccp	AJ441209.1.1426	37.1828	1.15627e-08	5	5.89605e-05	3.61682e-06	2.15892e-06	0.000105871	1.65901e-05	0	0	Bacteria;Proteobacteria;Epsilonproteobacteria;Campylobacterales;Helicobacteraceae;Sulfurovum;uncultured bacterium
g_test	ccp	AB440164.1.1430	36.9904	1.27036e-08	6	2.28234e-05	5.42523e-06	2.15892e-06	0.000169393	4.79271e-05	1.8366e-06	0	Bacteria;Proteobacteria;Epsilonproteobacteria;Campylobacterales;Helicobacteraceae;Sulfurovum;uncultured bacterium
g_test	ccp	New.ReferenceOTU2219	36.4922	1.62623e-08	5	1.52156e-05	1.80841e-06	0	9.41075e-06	0.000184335	1.46928e-05	0	Bacteria;Proteobacteria;Gammaproteobacteria;Thiotrichales;Piscirickettsiaceae;Thiomicrospira;uncultured gamma proteobacterium
g_test	ccp	New.CleanUp.ReferenceOTU766858	36.4763	1.63576e-08	4	7.22741e-05	1.44673e-05	0	0.000134103	2.02768e-05	0	0	Bacteria;Bacteroidetes;Flavobacteriia;Flavobacteriales;Flavobacteriaceae
g_test	ccp	KC682627.1.1220	35.955	2.11838e-08	6	3.04312e-05	9.40373e-05	0	4.70537e-06	9.21674e-06	1.8366e-06	0.000901684	Bacteria;Proteobacteria;Epsilonproteobacteria;Campylobacterales;Helicobacteraceae;Sulfurimonas;uncultured bacterium
g_test	ccp	JQ712391.1.1392	35.5639	2.57036e-08	4	7.41761e-05	2.17009e-05	0	8.2344e-05	5.53005e-06	0	0	Bacteria;Proteobacteria;Epsilonproteobacteria;Campylobacterales;Campylobacteraceae;Arcobacter;uncultured epsilon proteobacterium
g_test	ccp	FR852967.1.1523	35.5598	2.57036e-08	4	4.94507e-05	0	6.69265e-05	4.70537e-06	1.84335e-06	0	0	Bacteria;Proteobacteria;Deltaproteobacteria;Desulfobacterales;Desulfobulbaceae;Desulfobulbus;uncultured bacterium
g_test	ccp	AY531597.1.1476	35.159	3.13426e-08	5	6.08624e-05	7.23364e-06	5.1814e-05	6.58752e-05	1.84335e-05	0	0	Bacteria;Proteobacteria;Epsilonproteobacteria;Campylobacterales;Helicobacteraceae;Sulfurovum;uncultured bacterium
g_test	ccp	New.CleanUp.ReferenceOTU999629	35.0958	3.22801e-08	4	0	0	0	6.11698e-05	6.08305e-05	5.50981e-06	1.61015e-05	Bacteria;Proteobacteria;Alphaproteobacteria;Rhodobacterales;Rhodobacteraceae;Ruegeria
g_test	ccp	DQ228645.1.1439	34.6338	4.05833e-08	4	1.90195e-06	0	0	9.41075e-06	0.000108758	0	3.2203e-05	Bacteria;Bacteroidetes;Flavobacteriia;Flavobacteriales;Flavobacteriaceae;uncultured;uncultured bacterium
g_test	ccp	New.CleanUp.ReferenceOTU367834	33.7283	6.36929e-08	4	3.61371e-05	0	2.15892e-06	2.35269e-06	3.6867e-06	0	0	Bacteria;Proteobacteria;Epsilonproteobacteria;Campylobacterales;Helicobacteraceae;Sulfurimonas;uncultured bacterium
g_test	ccp	FJ792357.1.1332	33.6661	6.55654e-08	5	0.000239646	0.000788467	6.47675e-06	0.00146102	0.000108758	0	0	Bacteria;Proteobacteria;Epsilonproteobacteria;Campylobacterales;Campylobacteraceae;Sulfurospirillum;uncultured bacterium
g_test	ccp	New.CleanUp.ReferenceOTU380517	33.6495	6.59773e-08	4	5.70585e-05	9.04205e-06	0	2.58796e-05	2.39635e-05	0	0	Bacteria;Proteobacteria;Gammaproteobacteria;Thiotrichales;Piscirickettsiaceae;Thiomicrospira;uncultured gamma proteobacterium
g_test	ccp	JQ712421.1.1380	33.6004	6.74759e-08	5	6.46663e-05	4.52102e-05	1.07946e-05	0	9.21674e-06	1.8366e-06	0	Bacteria;Proteobacteria;Epsilonproteobacteria;Campylobacterales;Helicobacteraceae;Sulfurovum;uncultured epsilon proteobacterium
g_test	ccp	New.CleanUp.ReferenceOTU26971	32.9519	9.31268e-08	4	7.41761e-05	3.25514e-05	6.26086e-05	0	1.84335e-06	0	0	Bacteria;BD1-5;uncultured bacterium;uncultured bacterium;uncultured bacterium;uncultured bacterium;uncultured bacterium
g_test	ccp	GU235798.1.1298	32.6776	1.06599e-07	4	0	1.80841e-06	0	9.41075e-06	0.000125348	0	0.000579654	Bacteria;Proteobacteria;Alphaproteobacteria;Rhodobacterales;Rhodobacteraceae;Roseobacter clade NAC11-7 lineage
g_test	ccp	HQ673054.1.1483	31.5067	1.91038e-07	4	6.65683e-05	1.62757e-05	0	3.05849e-05	6.82039e-05	0	0	Bacteria;Bacteroidetes;Flavobacteriia;Flavobacteriales;Cryomorphaceae;Fluviicola
g_test	ccp	AF420351.1.1472	31.1692	2.25692e-07	4	0	0	2.80659e-05	5.88172e-05	3.87103e-05	0	0.000144914	Bacteria;Proteobacteria;Epsilonproteobacteria;Campylobacterales;Helicobacteraceae;Sulfurovum;uncultured bacterium
g_test	ccp	KF545018.1.1466	30.6288	2.95092e-07	4	3.9941e-05	0.000325514	0	0.000482301	1.10601e-05	0	0	Bacteria;Proteobacteria;Epsilonproteobacteria;Campylobacterales;Helicobacteraceae;Sulfurovum;uncultured bacterium
g_test	ccp	New.CleanUp.ReferenceOTU29644	30.6165	2.96306e-07	4	3.8039e-06	0	0	6.11698e-05	6.08305e-05	1.8366e-06	0	Bacteria;Proteobacteria;Alphaproteobacteria;Rhodobacterales;Rhodobacteraceae
g_test	ccp	New.CleanUp.ReferenceOTU514357	29.9321	4.1637e-07	5	3.8039e-05	1.80841e-06	0.000125217	7.05806e-06	5.53005e-06	0	0	Bacteria;Proteobacteria;Epsilonproteobacteria;Campylobacterales;Helicobacteraceae;Sulfurovum;uncultured bacterium
g_test	ccp	AY225618.1.1425	29.0734	6.38342e-07	5	8.36858e-05	8.13784e-05	1.29535e-05	4.70537e-05	1.84335e-06	0	0	Bacteria;Proteobacteria;Epsilonproteobacteria;Campylobacterales;Helicobacteraceae;Sulfurovum;uncultured epsilon proteobacterium
g_test	ccp	New.CleanUp.ReferenceOTU329652	28.5936	8.09785e-07	4	4.37449e-05	3.25514e-05	2.15892e-06	2.35269e-06	0	0	0	Bacteria;Proteobacteria;Epsilonproteobacteria;Campylobacterales;Helicobacteraceae;Sulfurimonas;uncultured bacterium
g_test	ccp	New.CleanUp.ReferenceOTU579852	28.0331	1.06955e-06	4	3.8039e-05	0	0	4.70537e-06	1.65901e-05	1.8366e-06	0	Bacteria;Bacteroidetes;Sphingobacteriia;Sphingobacteriales;Saprospiraceae;uncultured
g_test	ccp	JQ712411.1.1367	27.522	1.37817e-06	5	6.46663e-05	6.32943e-05	2.15892e-06	0.000164688	0.000156685	0	0	Bacteria;Proteobacteria;Epsilonproteobacteria;Campylobacterales;Helicobacteraceae;Sulfurimonas;uncultured epsilon proteobacterium
g_test	ccp	New.ReferenceOTU618	27.4869	1.39972e-06	4	1.71176e-05	5.42523e-06	0	0.000141161	2.58069e-05	0	0	Bacteria;Bacteroidetes;Flavobacteriia;Flavobacteriales;Cryomorphaceae;Fluviicola
g_test	ccp	New.CleanUp.ReferenceOTU1134356	27.4791	1.40235e-06	4	3.42351e-05	5.42523e-06	4.31784e-06	0	0	1.8366e-06	0	Bacteria;Proteobacteria;Epsilonproteobacteria;Nautiliales;Nautiliaceae;Nitratifractor;uncultured bacterium
g_test	ccp	AY531594.1.1459	27.3166	1.51801e-06	5	3.23332e-05	9.04205e-06	4.31784e-06	0.000167041	1.65901e-05	0	0	Bacteria;Proteobacteria;Epsilonproteobacteria;Campylobacterales;Helicobacteraceae;Sulfurovum;uncultured bacterium
g_test	ccp	FJ712477.1.1480	26.8164	1.94551e-06	5	4.18429e-05	1.08505e-05	4.31784e-06	7.05806e-06	5.53005e-06	0	0	Bacteria;Proteobacteria;Epsilonproteobacteria;Campylobacterales;Helicobacteraceae;Sulfurovum;uncultured bacterium
g_test	ccp	New.CleanUp.ReferenceOTU492076	26.5581	2.20924e-06	4	5.70585e-05	1.44673e-05	0	5.17591e-05	4.05537e-05	0	0	Bacteria;Bacteroidetes;Flavobacteriia;Flavobacteriales;Cryomorphaceae;Owenweeksia;uncultured bacterium
g_test	ccp	AY531600.1.1460	26.1417	2.71518e-06	4	3.42351e-05	7.23364e-06	2.15892e-06	4.70537e-06	0	0	0	Bacteria;Proteobacteria;Epsilonproteobacteria;Campylobacterales;Helicobacteraceae;Sulfurovum;uncultured epsilon proteobacterium
g_test	ccp	New.CleanUp.ReferenceOTU528763	25.6367	3.48162e-06	4	0	1.80841e-06	8.85156e-05	2.35269e-06	0	1.8366e-06	0	Bacteria;Proteobacteria;Epsilonproteobacteria;Nautiliales;Nautiliaceae;Nitratifractor;uncultured bacterium
g_test	ccp	New.CleanUp.ReferenceOTU927414	25.6364	3.48162e-06	6	4.75488e-05	7.23364e-06	2.15892e-06	0.000103518	2.39635e-05	1.8366e-06	0	Bacteria;Proteobacteria;Gammaproteobacteria;Thiotrichales;Piscirickettsiaceae;Thiomicrospira;uncultured bacterium
g_test	ccp	EU265791.1.1505	25.3812	3.9477e-06	4	3.8039e-06	0	2.15892e-06	6.11698e-05	3.6867e-05	0	0	Bacteria;Proteobacteria;Gammaproteobacteria;Thiotrichales;Thiotrichaceae;uncultured;uncultured bacterium
g_test	ccp	New.CleanUp.ReferenceOTU1114162	25.2921	4.11942e-06	4	3.8039e-05	1.80841e-05	0	4.70537e-06	1.84335e-06	0	0	Bacteria;Proteobacteria;Epsilonproteobacteria;Campylobacterales;Helicobacteraceae;Sulfurimonas;uncultured bacterium
g_test	ccp	AB842296.1.1433	25.0074	4.74019e-06	4	4.18429e-05	3.61682e-06	0	6.11698e-05	7.37339e-06	0	0	Bacteria;Proteobacteria;Epsilonproteobacteria;Campylobacterales;Helicobacteraceae;Sulfurovum;uncultured bacterium
g_test	ccp	DQ009101.1.2103	24.8943	5.00617e-06	4	0	1.80841e-06	0	4.70537e-06	7.37339e-05	0	0.000805075	Bacteria;Bacteroidetes;Flavobacteriia;Flavobacteriales;Flavobacteriaceae
g_test	ccp	New.CleanUp.ReferenceOTU654657	24.6984	5.51031e-06	7	3.9941e-05	1.80841e-06	1.29535e-05	7.05806e-06	5.53005e-06	3.67321e-06	1.61015e-05	Bacteria;Proteobacteria;Epsilonproteobacteria;Campylobacterales;Helicobacteraceae;Sulfurovum;uncultured epsilon proteobacterium
g_test	ccp	New.CleanUp.ReferenceOTU865726	23.6063	9.49459e-06	6	4.18429e-05	5.42523e-06	2.15892e-06	4.4701e-05	6.26739e-05	1.8366e-06	0	Bacteria;Proteobacteria;Gammaproteobacteria;Thiotrichales;Piscirickettsiaceae;Thiomicrospira;uncultured gamma proteobacterium
g_test	ccp	New.ReferenceOTU1147	23.5858	9.57352e-06	4	9.50975e-06	1.80841e-06	0	9.41075e-05	2.76502e-05	0	0	Bacteria;Bacteroidetes;Flavobacteriia;Flavobacteriales;Flavobacteriaceae;Lutibacter;uncultured bacterium
g_test	ccp	New.CleanUp.ReferenceOTU836964	23.4982	9.98262e-06	4	1.90195e-06	1.80841e-06	0	8.2344e-05	1.65901e-05	0	0	Bacteria;Proteobacteria;Epsilonproteobacteria;Campylobacterales;Helicobacteraceae;Sulfurimonas
g_test	ccp	New.CleanUp.ReferenceOTU951997	23.4851	1.00287e-05	4	3.8039e-05	7.23364e-06	0	1.64688e-05	7.37339e-06	0	0	Bacteria;Proteobacteria;Gammaproteobacteria;Thiotrichales;Piscirickettsiaceae;Thiomicrospira;uncultured gamma proteobacterium
g_test	ccp	New.CleanUp.ReferenceOTU22109	22.8766	1.35685e-05	4	4.56468e-05	9.04205e-06	0	6.82279e-05	1.29034e-05	0	0	Bacteria;Proteobacteria;Epsilonproteobacteria;Campylobacterales;Helicobacteraceae;Sulfurovum;uncultured bacterium
g_test	ccp	AJ441205.1.1430	22.2977	1.80875e-05	4	3.04312e-05	1.80841e-06	1.07946e-05	7.05806e-06	0	0	0	Bacteria;Proteobacteria;Epsilonproteobacteria;Campylobacterales;Helicobacteraceae;Sulfurovum;uncultured bacterium
g_test	ccp	New.CleanUp.ReferenceOTU396210	22.1122	1.98068e-05	4	2.28234e-05	1.80841e-06	0	5.64645e-05	5.53005e-05	0	0	Bacteria;Proteobacteria;Gammaproteobacteria;Thiotrichales;Piscirickettsiaceae;Thiomicrospira;uncultured gamma proteobacterium
g_test	ccp	New.CleanUp.ReferenceOTU194132	21.4689	2.72687e-05	4	2.85293e-05	1.80841e-06	0	9.41075e-05	1.29034e-05	0	0	Bacteria;Bacteroidetes;Flavobacteriia;Flavobacteriales;Flavobacteriaceae;Lutibacter;uncultured bacterium
g_test	ccp	FR852995.1.1476	21.4073	2.80677e-05	5	3.23332e-05	3.61682e-06	2.15892e-06	4.70537e-06	1.29034e-05	0	0	Bacteria;Proteobacteria;Epsilonproteobacteria;Campylobacterales;Helicobacteraceae;Sulfurovum;uncultured bacterium
g_test	ccp	New.CleanUp.ReferenceOTU1129217	21.392	2.8228e-05	4	3.61371e-05	3.61682e-06	0	4.23484e-05	7.37339e-06	0	0	Bacteria;Bacteroidetes;Flavobacteriia;Flavobacteriales;Flavobacteriaceae;Lutibacter;uncultured bacterium
g_test	ccp	AF354608.1.1499	21.1891	3.11818e-05	4	5.70585e-06	1.80841e-06	0	3.05849e-05	6.26739e-05	0	0	Bacteria;Proteobacteria;Gammaproteobacteria;Thiotrichales;Piscirickettsiaceae;Thiomicrospira;uncultured gamma proteobacterium
g_test	ccp	GQ901061.1.1314	20.912	3.57482e-05	5	0	9.04205e-06	2.15892e-06	0	4.97704e-05	5.69347e-05	0.000161015	Bacteria;Proteobacteria;Gammaproteobacteria;Alteromonadales;Idiomarinaceae;Idiomarina
g_test	ccp	GU369923.1.1384	20.4636	4.46462e-05	4	1.90195e-06	0	6.47675e-06	5.64645e-05	1.65901e-05	0	0	Bacteria;Proteobacteria;Epsilonproteobacteria;Campylobacterales;Helicobacteraceae;Sulfurovum;uncultured epsilon proteobacterium
g_test	ccp	AB476174.1.1430	20.1835	5.1258e-05	5	1.90195e-06	1.80841e-06	4.31784e-06	7.76387e-05	7.37339e-06	0	0	Bacteria;Proteobacteria;Epsilonproteobacteria;Campylobacterales;Helicobacteraceae;Sulfurovum;uncultured bacterium
g_test	ccp	New.ReferenceOTU494	18.9525	9.468e-05	4	3.8039e-05	1.44673e-05	2.37481e-05	0	0	1.8366e-06	0	Bacteria;BD1-5;uncultured bacterium;uncultured bacterium;uncultured bacterium;uncultured bacterium;uncultured bacterium
g_test	ccp	New.CleanUp.ReferenceOTU93138	18.8705	9.84541e-05	4	1.90195e-06	0	0	2.11742e-05	5.16138e-05	1.8366e-06	0	Unassigned
g_test	ccp	New.CleanUp.ReferenceOTU275937	18.8139	0.000101083	4	2.85293e-05	9.04205e-06	0	7.05806e-06	0	1.8366e-06	0	Bacteria;Proteobacteria;Epsilonproteobacteria;Campylobacterales;Helicobacteraceae;Sulfurovum;uncultured bacterium
g_test	ccp	New.CleanUp.ReferenceOTU522366	18.3593	0.000126644	4	0	0	0	9.41075e-06	6.82039e-05	3.30589e-05	1.61015e-05	Bacteria;Verrucomicrobia;Verrucomicrobiae;Verrucomicrobiales;DEV007;uncultured bacterium;uncultured bacterium
g_test	ccp	New.CleanUp.ReferenceOTU260090	17.5942	0.00018531	4	2.85293e-05	5.42523e-06	0	7.05806e-06	9.21674e-06	0	0	Bacteria;Proteobacteria;Gammaproteobacteria;Thiotrichales;Piscirickettsiaceae;Thiomicrospira;uncultured gamma proteobacterium
g_test	ccp	AY225614.1.1436	16.9995	0.000249008	4	6.27644e-05	9.76541e-05	1.94303e-05	3.29376e-05	0	0	0	Bacteria;Proteobacteria;Epsilonproteobacteria;Campylobacterales;Helicobacteraceae;Sulfurovum;uncultured epsilon proteobacterium
g_test	ccp	New.ReferenceOTU1930	16.9869	0.000250102	5	2.85293e-05	3.61682e-06	0	3.99957e-05	7.55773e-05	7.34642e-06	0	Bacteria;Proteobacteria;Gammaproteobacteria;Thiotrichales;Piscirickettsiaceae;Thiomicrospira;uncultured gamma proteobacterium
g_test	ccp	New.ReferenceOTU2182	16.6218	0.000299623	5	2.66273e-05	1.80841e-06	2.15892e-06	2.35269e-05	3.13369e-05	0	0	Bacteria;Proteobacteria;Gammaproteobacteria;Thiotrichales;Piscirickettsiaceae;Thiomicrospira;uncultured gamma proteobacterium
g_test	ccp	FN562827.1.1352	16.5187	0.000314877	5	2.85293e-05	7.23364e-06	4.31784e-06	1.17634e-05	1.84335e-06	0	0	Bacteria;Proteobacteria;Epsilonproteobacteria;Campylobacterales;Helicobacteraceae;Sulfurovum;uncultured epsilon proteobacterium
g_test	ccp	New.CleanUp.ReferenceOTU853745	15.9311	0.000421625	4	2.66273e-05	3.61682e-06	2.15892e-06	2.35269e-05	0	0	0	Bacteria;Proteobacteria;Epsilonproteobacteria;Campylobacterales;Helicobacteraceae;Sulfurovum;uncultured epsilon proteobacterium
g_test	ccp	JF738106.1.1522	15.7565	0.000459228	4	0	1.80841e-06	2.15892e-06	3.99957e-05	1.47468e-05	0	0	Bacteria;Proteobacteria;Zetaproteobacteria;Mariprofundales;Mariprofundaceae;Mariprofundus;uncultured bacterium
g_test	ccp	JX403058.1.1513	15.5252	0.000514548	4	0.000104607	0.000368916	0	0.000136456	5.89872e-05	0	0	Bacteria;Proteobacteria;Epsilonproteobacteria;Campylobacterales;Helicobacteraceae;Sulfurimonas
g_test	ccp	FN554146.1.1471	15.4112	0.000543737	4	2.66273e-05	1.62757e-05	0	4.70537e-06	1.84335e-06	0	0	Bacteria;Proteobacteria;Epsilonproteobacteria;Campylobacterales;Helicobacteraceae;Sulfurimonas;uncultured bacterium
g_test	ccp	JN662200.1.1387	15.1787	0.000609616	4	2.28234e-05	1.80841e-06	1.29535e-05	4.70537e-06	0	0	0	Bacteria;Proteobacteria;Epsilonproteobacteria;Campylobacterales;Helicobacteraceae;Sulfurovum;uncultured bacterium
g_test	ccp	New.CleanUp.ReferenceOTU999189	14.6418	0.000795847	4	1.90195e-06	0	0	3.29376e-05	5.53005e-05	0	0.00053135	Bacteria;Bacteroidetes;Cytophagia;Cytophagales;Flammeovirgaceae;Reichenbachiella;uncultured bacterium
g_test	ccp	GU220741.1.1462	14.5694	0.000823652	5	1.33137e-05	1.26589e-05	4.96551e-05	6.35225e-05	9.21674e-06	0	0	Bacteria;Proteobacteria;Epsilonproteobacteria;Campylobacterales;Helicobacteraceae;Sulfurimonas;uncultured bacterium
g_test	ccp	New.CleanUp.ReferenceOTU575995	13.509	0.00139704	4	2.47254e-05	3.61682e-06	0	1.64688e-05	3.50236e-05	0	0	Bacteria;Proteobacteria;Gammaproteobacteria;Thiotrichales;Piscirickettsiaceae;Thiomicrospira;uncultured gamma proteobacterium
g_test	ccp	JQ712385.1.1383	13.3014	0.00154697	4	3.8039e-06	1.08505e-05	0	8.94021e-05	3.6867e-06	0	0	Bacteria;Proteobacteria;Epsilonproteobacteria;Campylobacterales;Helicobacteraceae;Sulfurimonas;uncultured bacterium
g_test	ccp	JQ712439.1.1383	13.2814	0.00155958	6	7.6078e-06	2.71261e-05	2.15892e-06	9.41075e-05	2.94936e-05	0	1.61015e-05	Bacteria;Proteobacteria;Epsilonproteobacteria;Campylobacterales;Helicobacteraceae;Sulfurimonas;uncultured bacterium
g_test	ccp	New.ReferenceOTU805	12.8662	0.00191594	4	1.90195e-06	1.80841e-05	0	4.4701e-05	3.50236e-05	0	0	Bacteria;Proteobacteria;Gammaproteobacteria;Thiotrichales;Piscirickettsiaceae;Thiomicrospira;uncultured gamma proteobacterium
g_test	ccp	New.ReferenceOTU2030	12.8063	0.00197051	4	1.52156e-05	1.80841e-06	0	4.23484e-05	2.76502e-05	0	0	Bacteria;Proteobacteria;Epsilonproteobacteria;Campylobacterales;Helicobacteraceae;Sulfurovum
g_test	ccp	JQ712377.1.1376	12.622	0.00215678	5	4.75488e-05	3.61682e-05	1.94303e-05	4.4701e-05	5.53005e-06	0	0	Bacteria;Proteobacteria;Epsilonproteobacteria;Campylobacterales;Helicobacteraceae;Sulfurovum;uncultured epsilon proteobacterium
g_test	ccp	New.ReferenceOTU876	12.5695	0.00221006	4	0	0	0	2.35269e-06	4.97704e-05	1.8366e-06	0.000144914	Bacteria;Proteobacteria;Alphaproteobacteria;OCS116 clade;uncultured bacterium;uncultured bacterium;uncultured bacterium
g_test	ccp	GQ261792.1.1462	12.5653	0.00221067	4	0	0	0	1.41161e-05	3.31803e-05	1.8366e-06	3.2203e-05	Bacteria;Proteobacteria;Epsilonproteobacteria;Campylobacterales;Helicobacteraceae;Sulfurimonas;uncultured epsilon proteobacterium
g_test	ccp	New.CleanUp.ReferenceOTU664922	12.4638	0.00232151	4	4.75488e-05	3.79766e-05	0	9.88128e-05	5.16138e-05	0	0	Bacteria;Bacteroidetes;Flavobacteriia;Flavobacteriales;Flavobacteriaceae
g_test	ccp	JQ611092.1.1377	12.4544	0.0023282	4	1.71176e-05	1.80841e-06	4.31784e-06	2.35269e-06	0	0	0	Bacteria;Proteobacteria;Epsilonproteobacteria;Campylobacterales;Helicobacteraceae;Sulfurovum;uncultured bacterium
g_test	ccp	New.CleanUp.ReferenceOTU887460	11.944	0.0029996	4	1.52156e-05	0	2.15892e-06	1.41161e-05	2.76502e-05	0	0	Bacteria;Proteobacteria;Gammaproteobacteria;Thiotrichales;Piscirickettsiaceae;Thiomicrospira;uncultured gamma proteobacterium
g_test	ccp	EU555125.1.1224	11.8865	0.00308139	4	1.71176e-05	0	4.31784e-06	1.17634e-05	1.10601e-05	0	0	Bacteria;Proteobacteria;Deltaproteobacteria;Desulfobacterales;Desulfobulbaceae;Desulfobulbus;uncultured bacterium
g_test	ccp	HQ691997.1.1360	11.3301	0.00406239	4	0	0	0	2.35269e-06	1.84335e-06	3.48955e-05	3.2203e-05	Bacteria;Proteobacteria;Alphaproteobacteria;Rickettsiales;Rickettsiaceae;Rickettsia
g_test	ccp	New.CleanUp.ReferenceOTU180193	10.6114	0.00580853	4	2.09215e-05	5.42523e-06	0	2.35269e-05	3.50236e-05	0	0	Bacteria;Proteobacteria
g_test	ccp	New.CleanUp.ReferenceOTU354370	10.6014	0.0058269	4	1.52156e-05	0	1.94303e-05	4.70537e-06	5.53005e-06	0	0	Bacteria;BD1-5;uncultured bacterium;uncultured bacterium;uncultured bacterium;uncultured bacterium;uncultured bacterium
g_test	ccp	New.CleanUp.ReferenceOTU958895	10.5528	0.00595956	4	1.71176e-05	3.61682e-06	6.47675e-06	0	1.84335e-06	0	0	Bacteria;Proteobacteria;Epsilonproteobacteria;Campylobacterales;Helicobacteraceae;Sulfurovum;uncultured bacterium
g_test	ccp	AB278150.1.1475	10.27	0.00685244	5	1.52156e-05	1.80841e-06	0	2.35269e-06	1.84335e-06	1.8366e-06	0	Bacteria;Proteobacteria;Epsilonproteobacteria;Campylobacterales;Helicobacteraceae;Sulfurovum;uncultured epsilon proteobacterium
g_test	ccp	New.ReferenceOTU1749	9.54777	0.00981488	4	0	0	2.15892e-06	2.82322e-05	7.37339e-06	1.8366e-06	0	Bacteria;Proteobacteria;Zetaproteobacteria;Mariprofundales;Mariprofundaceae;Mariprofundus;uncultured bacterium
g_test	ccp	JN873979.1.1471	9.48595	0.0101048	4	1.33137e-05	1.80841e-06	0	0	1.84335e-06	1.8366e-06	0	Bacteria;Proteobacteria;Epsilonproteobacteria;Campylobacterales;Helicobacteraceae;Sulfurovum;uncultured bacterium
g_test	ccp	New.CleanUp.ReferenceOTU15196	9.41521	0.0104499	4	0	0	2.15892e-06	3.99957e-05	1.84335e-06	0	4.83045e-05	Bacteria;Bacteroidetes;Flavobacteriia;Flavobacteriales;Flavobacteriaceae;Ulvibacter;uncultured Bacteroidetes bacterium
g_test	ccp	EF667896.1.1460	9.12101	0.0120842	4	0	0	0	7.05806e-06	1.29034e-05	2.75491e-05	9.6609e-05	Bacteria;Proteobacteria;Alphaproteobacteria;Rickettsiales;Rickettsiaceae;Rickettsia
g_test	ccp	New.ReferenceOTU2587	9.05686	0.0124558	4	1.33137e-05	1.80841e-06	0	5.17591e-05	1.84335e-06	0	0	Bacteria;Proteobacteria;Epsilonproteobacteria;Campylobacterales;Helicobacteraceae;Sulfurovum;uncultured bacterium
g_test	ccp	New.CleanUp.ReferenceOTU611648	8.7223	0.0146976	5	1.90195e-05	1.80841e-06	0	7.05806e-06	3.6867e-05	3.67321e-06	0	Bacteria;Proteobacteria;Gammaproteobacteria;Thiotrichales;Piscirickettsiaceae;Thiomicrospira;uncultured gamma proteobacterium
g_test	ccp	AJ441203.1.1422	8.5583	0.0159252	6	5.70585e-06	3.25514e-05	7.7721e-05	2.35269e-06	1.29034e-05	3.67321e-06	0	Bacteria;Proteobacteria;Epsilonproteobacteria;Campylobacterales;Helicobacteraceae;Sulfurovum;uncultured epsilon proteobacterium
g_test	ccp	JN662225.1.1386	8.52271	0.0161824	4	1.33137e-05	1.80841e-06	0	3.29376e-05	1.29034e-05	0	0	Bacteria;Proteobacteria;Epsilonproteobacteria;Campylobacterales;Helicobacteraceae;Sulfurovum;uncultured epsilon proteobacterium
g_test	ccp	New.CleanUp.ReferenceOTU724204	8.36253	0.0175006	4	1.52156e-05	1.80841e-06	0	2.82322e-05	3.6867e-06	0	0	Bacteria;Proteobacteria;Epsilonproteobacteria;Campylobacterales;Helicobacteraceae;Sulfurimonas;uncultured bacterium
g_test	ccp	JN662103.1.1356	7.46418	0.0273752	4	7.6078e-06	0	0	4.70537e-05	3.6867e-06	1.8366e-06	0	Bacteria;Proteobacteria;Epsilonproteobacteria;Campylobacterales;Campylobacteraceae;Campylobacter;uncultured bacterium
g_test	ccp	DQ394973.1.1470	7.16361	0.0317583	4	1.33137e-05	3.61682e-06	2.15892e-06	0	5.53005e-06	0	0	Bacteria;Proteobacteria;Epsilonproteobacteria;Campylobacterales;Helicobacteraceae;Sulfurovum;uncultured epsilon proteobacterium
g_test	ccp	New.CleanUp.ReferenceOTU482633	7.15941	0.031769	4	1.71176e-05	9.04205e-06	0	1.17634e-05	1.84335e-06	0	0	Bacteria;Bacteroidetes;Flavobacteriia;Flavobacteriales;Flavobacteriaceae;Lutibacter;uncultured bacterium
g_test	ccp	New.CleanUp.ReferenceOTU297626	7.12207	0.0323108	4	1.33137e-05	1.80841e-06	0	1.17634e-05	1.47468e-05	0	0	Bacteria;Bacteroidetes;Bacteroidia;Bacteroidales;Marinilabiaceae;uncultured
g_test	ccp	JQ678423.1.1356	7.08406	0.0328728	5	0	0	4.31784e-06	7.05806e-06	1.10601e-05	5.50981e-06	0.00020932	Bacteria;Proteobacteria;Gammaproteobacteria;Oceanospirillales;SUP05 cluster;uncultured bacterium;uncultured bacterium
g_test	ccp	DQ228650.1.1452	6.50936	0.0437389	4	2.66273e-05	2.89346e-05	0	2.11742e-05	7.37339e-06	0	0	Bacteria;Proteobacteria;Epsilonproteobacteria;Campylobacterales;Helicobacteraceae;Sulfurimonas;uncultured bacterium
g_test	ccp	FN393026.1.1401	6.41118	0.0458591	4	1.33137e-05	3.61682e-06	0	9.41075e-06	3.6867e-06	0	0	Bacteria;Proteobacteria;Epsilonproteobacteria;Campylobacterales;Helicobacteraceae;Sulfurovum;uncultured bacterium
g_test	ccp	JQ032048.1.1222	6.39568	0.0461351	4	0	0	2.15892e-06	0	9.21674e-06	2.38759e-05	3.2203e-05	Bacteria;Proteobacteria;Gammaproteobacteria;Alteromonadales;Idiomarinaceae;Idiomarina
g_test	ccp	GQ345764.1.1378	6.28354	0.0487108	6	1.90195e-06	0	2.15892e-06	1.88215e-05	2.94936e-05	2.38759e-05	1.61015e-05	Bacteria;Proteobacteria;Gammaproteobacteria;Oceanospirillales;SUP05 cluster;uncultured gamma proteobacterium;uncultured gamma proteobacterium
g_test	ccp	JN874173.1.1469	6.25679	0.0492806	4	1.14117e-05	1.80841e-06	0	9.41075e-06	1.84335e-06	0	0	Bacteria;Proteobacteria;Epsilonproteobacteria;Campylobacterales;Helicobacteraceae;Sulfurimonas;uncultured bacterium
ccp=chalcoyprite (CuFeS2)

## Sheet: Bac py mrc
Supplementary Table S6: significant differences between counts in distinct bacterial and archaeal groups found in relation to mineralogy.
						active chimneys			inactive chimneys
Test	Variable	#OTU ID	Test-Statistic	FDR_P	n_sites	S5	S6	S8	S7	S1	S2	S4	taxonomy
g_test	py_mrc	FJ820437.1.1482	84942.3	0	6	0.025412	0.473491	0.000157601	0.00813324	9.40108e-05	0	8.05075e-05	Bacteria;Proteobacteria;Epsilonproteobacteria;Campylobacterales;Helicobacteraceae;Sulfurimonas;uncultured bacterium
g_test	py_mrc	AB858534.1.1408	73025.9	0	4	0	0	0	0.00012234	0.000453464	0.393849	0.000788974	Bacteria;Proteobacteria;Deltaproteobacteria;Desulfobacterales;Desulfobulbaceae;Desulfobulbus;uncultured bacterium
g_test	py_mrc	GQ867408.1.1451	67210.8	0	7	3.04312e-05	3.25514e-05	0.00261877	4.70537e-06	0.000116131	0.379116	0.00053135	Bacteria;Proteobacteria;Gammaproteobacteria;Enterobacteriales;Enterobacteriaceae;Escherichia-Shigella
g_test	py_mrc	AY531584.1.1473	59952.3	0	5	0.000197803	4.52102e-05	0.282332	8.46967e-05	0	5.50981e-06	0	Bacteria;Proteobacteria;Epsilonproteobacteria;Nautiliales;Nautiliaceae;Nitratifractor;uncultured bacterium
g_test	py_mrc	JQ712402.1.1377	28421.8	0	7	0.173901	0.0226395	0.00674014	0.000178804	0.000110601	1.10196e-05	4.83045e-05	Bacteria;Proteobacteria;Epsilonproteobacteria;Campylobacterales;Helicobacteraceae;Sulfurovum;uncultured bacterium
g_test	py_mrc	New.ReferenceOTU1843	19625.4	0	6	2.47254e-05	1.08505e-05	0.0918792	0.000211742	3.31803e-05	5.50981e-06	0	Bacteria;Proteobacteria;Deltaproteobacteria;Desulfobacterales;Desulfobulbaceae;Desulfobulbus
g_test	py_mrc	New.ReferenceOTU2026	19214.3	0	5	7.6078e-06	9.04205e-06	0.0012349	0.0963919	0.000234105	0	0	Bacteria;Proteobacteria;Gammaproteobacteria;Methylococcales;Marine Methylotrophic Group 2;uncultured gamma proteobacterium;uncultured gamma proteobacterium
g_test	py_mrc	AY327884.1.1457	14838.7	0	7	1.90195e-05	3.61682e-06	0.000751303	0.0685549	0.00510239	1.8366e-06	4.83045e-05	Bacteria;Bacteroidetes;Flavobacteriia;Flavobacteriales;Flavobacteriaceae;Lutibacter;uncultured bacterium
g_test	py_mrc	JQ287449.1.1504	13986.2	0	7	0.0558736	0.00882866	0.000781528	0.06492	0.130201	0.00526555	4.83045e-05	Bacteria;Proteobacteria;Gammaproteobacteria;Thiotrichales;Piscirickettsiaceae;Thiomicrospira;uncultured gamma proteobacterium
g_test	py_mrc	FJ905684.1.1378	13060.3	0	7	0.00127431	0.00059135	0.000680059	0.0612663	0.0120629	3.67321e-05	0.000692365	Bacteria;Proteobacteria;Epsilonproteobacteria;Campylobacterales;Helicobacteraceae;Sulfurovum;uncultured bacterium
g_test	py_mrc	AY225615.1.1425	12571	0	7	0.0338015	0.0382858	2.15892e-05	0.000519944	9.03241e-05	1.8366e-06	1.61015e-05	Bacteria;Proteobacteria;Epsilonproteobacteria;Campylobacterales;Helicobacteraceae;Sulfurimonas;uncultured bacterium
g_test	py_mrc	EU574671.1.1438	11898.6	0	6	0.00548142	0.0712278	6.26086e-05	0.00243738	0.000114288	0	3.2203e-05	Bacteria;Proteobacteria;Epsilonproteobacteria;Campylobacterales;Helicobacteraceae;Sulfurimonas
g_test	py_mrc	AY531587.1.1446	10781.6	0	6	0.0272131	0.00260954	0.0990274	0.0164853	0.0077734	4.40785e-05	0	Bacteria;Proteobacteria;Epsilonproteobacteria;Campylobacterales;Helicobacteraceae;Sulfurovum;uncultured bacterium
g_test	py_mrc	AY251057.1.1427	10185.9	0	6	0.0360667	0.0441596	0.00537786	1.17634e-05	5.53005e-06	3.67321e-06	0	Bacteria;Proteobacteria;Epsilonproteobacteria;Nautiliales;Nautiliaceae;uncultured
g_test	py_mrc	AB476182.1.1462	8686.03	0	7	0.000273881	3.61682e-06	0.000371334	0.0343186	0.0090748	3.67321e-06	1.61015e-05	Bacteria;Proteobacteria;Gammaproteobacteria;Thiotrichales;Thiotrichaceae;uncultured;uncultured bacterium
g_test	py_mrc	New.ReferenceOTU79	8563.93	0	4	0	0	0	5.64645e-05	0.0366255	0.000462824	1.61015e-05	Bacteria;Proteobacteria;Gammaproteobacteria;Thiotrichales;Piscirickettsiaceae;endosymbionts;uncultured bacterium
g_test	py_mrc	New.ReferenceOTU9	8530.81	0	5	0.000401312	0.0448594	5.1814e-05	4.70537e-06	9.21674e-06	0	0	Bacteria;Proteobacteria;Epsilonproteobacteria;Nautiliales;Nautiliaceae;uncultured
g_test	py_mrc	New.ReferenceOTU2516	8254.2	0	7	0.000412723	5.42523e-06	0.000265547	0.0255972	0.0195008	0.001214	0.000466944	Bacteria;Bacteroidetes;Flavobacteriia;Flavobacteriales;Flavobacteriaceae;Lutibacter;uncultured bacterium
g_test	py_mrc	FN562914.1.1348	8000	0	6	0.000368978	3.61682e-06	0	0.00212918	0.0575291	0.00408645	0.0536019	Bacteria;Bacteroidetes;Cytophagia;Cytophagales;Flammeovirgaceae;uncultured;uncultured bacterium
g_test	py_mrc	DQ270642.1.1451	7970.13	0	5	5.70585e-06	1.80841e-06	0.000170555	0.0378336	0.0020793	0	0	Bacteria;Proteobacteria;Alphaproteobacteria;SB1-18;uncultured bacterium;uncultured bacterium;uncultured bacterium
g_test	py_mrc	New.ReferenceOTU2421	7641.45	0	5	7.6078e-06	1.80841e-06	0.035566	0.000207036	4.2397e-05	0	0	Bacteria;Aquificae;Aquificae;Aquificales;Desulfurobacteriaceae;Desulfurobacterium
g_test	py_mrc	AY251062.1.1454	7380.01	0	6	0.00704102	0.00105973	0.0595408	4.23484e-05	8.11073e-05	5.50981e-06	0	Bacteria;Proteobacteria;Epsilonproteobacteria;Nautiliales;Nautiliaceae;Nitratifractor;uncultured bacterium
g_test	py_mrc	JQ287020.1.1482	7130.59	0	6	3.8039e-06	1.80841e-06	0.000274183	0.0334293	0.00620655	0.000920139	0	Bacteria;Bacteroidetes;Cytophagia;Cytophagales;Flammeovirgaceae;Flexithrix
g_test	py_mrc	CP002683.864391.865952	7084.06	0	5	9.50975e-06	7.23364e-06	0.0331739	7.76387e-05	2.02768e-05	0	0	Bacteria;Thermodesulfobacteria;Thermodesulfobacteria;Thermodesulfobacteriales;Thermodesulfobacteriaceae;Thermodesulfatator
g_test	py_mrc	JQ712373.1.1376	7068.29	0	7	5.70585e-06	3.61682e-06	0.000371334	0.0359138	0.000975131	1.8366e-06	0.00169066	Bacteria;Proteobacteria;Epsilonproteobacteria;Campylobacterales;Helicobacteraceae;Sulfurimonas;uncultured bacterium
g_test	py_mrc	New.ReferenceOTU1168	6990.53	0	5	1.14117e-05	1.80841e-06	0.000606656	0.0277099	0.00577521	0	0	Bacteria;Bacteroidetes;Flavobacteriia;Flavobacteriales;Flavobacteriaceae
g_test	py_mrc	New.ReferenceOTU2480	6906.47	0	7	0.00247063	0.000247752	0.000205097	0.0178687	0.0227101	1.8366e-06	1.61015e-05	Bacteria;Proteobacteria;Epsilonproteobacteria;Campylobacterales;Helicobacteraceae;Sulfurimonas;uncultured bacterium
g_test	py_mrc	FJ497620.1.1420	6809.37	0	5	0.0182777	0.0269996	1.51124e-05	0.000232916	0.00111338	0	0	Bacteria;Proteobacteria;Epsilonproteobacteria;Campylobacterales;Campylobacteraceae;Sulfurospirillum;uncultured bacterium
g_test	py_mrc	EF444735.1.1240	6391.11	0	5	0.0351842	0.000160948	1.07946e-05	9.41075e-06	1.84335e-06	0	0	Bacteria;Proteobacteria;Epsilonproteobacteria;Campylobacterales;Helicobacteraceae;Sulfurimonas;uncultured bacterium
g_test	py_mrc	New.ReferenceOTU1615	6245.1	0	5	1.14117e-05	1.80841e-06	0.0292555	1.64688e-05	3.6867e-05	0	0	Bacteria;Thermodesulfobacteria;Thermodesulfobacteria;Thermodesulfobacteriales;Thermodesulfobacteriaceae;Thermodesulfatator
g_test	py_mrc	New.ReferenceOTU1465	6239.95	0	4	0	0	0	0.0016163	0.0358015	0.00388442	1.61015e-05	Bacteria;Proteobacteria;Gammaproteobacteria;Xanthomonadales;uncultured
g_test	py_mrc	AB095118.1.1050	6186.86	0	4	1.90195e-06	0.000231476	0.0304774	2.82322e-05	0	0	0	Archaea;Euryarchaeota;Methanococci;Methanococcales;Methanocaldococcaceae;Methanocaldococcus
g_test	py_mrc	JQ287102.1.1446	6058.3	0	5	1.90195e-06	0	0	0.000585819	0.0250677	1.10196e-05	0.00196438	Bacteria;Proteobacteria;Alphaproteobacteria;Rhizobiales;Hyphomicrobiaceae;uncultured;uncultured bacterium
g_test	py_mrc	FR852972.1.1536	5857.76	0	5	7.6078e-06	6.69112e-05	0.0280098	7.05806e-06	0	5.50981e-06	0	Bacteria;Proteobacteria;Deltaproteobacteria;Desulfovibrionales;Desulfohalobiaceae;Desulfothermus
g_test	py_mrc	JQ611151.1.1378	5683.25	0	4	1.71176e-05	3.61682e-06	0.0267447	7.05806e-06	0	0	0	Bacteria;Proteobacteria;Epsilonproteobacteria;Nautiliales;Nautiliaceae;Nitratifractor;uncultured bacterium
g_test	py_mrc	New.ReferenceOTU1163	5645.44	0	5	0.0316884	0.000672728	0.000144648	7.05806e-06	0	1.8366e-06	0	Bacteria;Proteobacteria;Epsilonproteobacteria;Nautiliales;Nautiliaceae;Thioreductor
g_test	py_mrc	GQ349546.1.1352	5488.39	0	7	0.00993008	0.0261406	8.63567e-06	0.000985776	0.000248852	1.8366e-06	0.000434741	Bacteria;Proteobacteria;Epsilonproteobacteria;Campylobacterales;Helicobacteraceae;Sulfurimonas;uncultured epsilon proteobacterium
g_test	py_mrc	AB100010.1.1315	5389.37	0	5	9.12936e-05	0	0	0.000101166	0.0393223	0.00677156	4.83045e-05	Bacteria;Bacteroidetes;VC2,1 Bac22;uncultured alpha proteobacterium;uncultured alpha proteobacterium;uncultured alpha proteobacterium;uncultured alpha proteobacterium
g_test	py_mrc	JQ287054.1.1513	5330.08	0	5	0	3.61682e-06	0	9.88128e-05	0.0216243	5.69347e-05	1.61015e-05	Bacteria;Proteobacteria;Gammaproteobacteria
g_test	py_mrc	HM557570.1.1378	5200.54	0	6	3.8039e-06	1.80841e-06	0.0002785	0	1.10601e-05	0.0298448	8.05075e-05	Bacteria;Proteobacteria;Gammaproteobacteria;Xanthomonadales;Xanthomonadaceae;Stenotrophomonas
g_test	py_mrc	AB842284.1.1464	5149.35	0	6	1.90195e-06	1.80841e-06	0	0.00100224	0.0212557	0.000112033	0.00141693	Bacteria;Proteobacteria;Gammaproteobacteria;Order Incertae Sedis;Family Incertae Sedis;Marinicella;uncultured bacterium
g_test	py_mrc	New.ReferenceOTU1674	4852.53	0	5	1.90195e-06	1.80841e-06	0.0226384	0.000105871	0	1.8366e-06	0	Bacteria;Aquificae;Aquificae;Aquificales;Desulfurobacteriaceae;Desulfurobacterium
g_test	py_mrc	New.ReferenceOTU633	4495.7	0	4	0.0248889	3.61682e-06	1.07946e-05	7.05806e-06	0	0	0	Bacteria;Caldiserica;Caldisericia;Caldisericales;Caldisericaceae;Caldisericum
g_test	py_mrc	AB057722.1.1392	4450.17	0	4	5.70585e-06	0	0.0208336	1.64688e-05	5.53005e-06	0	0	Archaea;Euryarchaeota;Methanococci;Methanococcales;Methanococcaceae;uncultured
g_test	py_mrc	DQ832646.1.1381	4408.25	0	7	0.00138652	1.26589e-05	0.000213733	0.0189462	0.0186086	0.00386054	0.0100312	Bacteria;Proteobacteria;Alphaproteobacteria;Rhodobacterales;Rhodobacteraceae;uncultured;uncultured bacterium
g_test	py_mrc	New.ReferenceOTU2022	4364.93	0	5	1.90195e-06	1.80841e-06	8.85156e-05	0.021193	0.00077052	0	0	Bacteria;Actinobacteria;Acidimicrobiia;Acidimicrobiales;uncultured;uncultured bacterium;uncultured bacterium
g_test	py_mrc	FR852970.1.1474	4348.27	0	6	0.016935	0.00754469	4.74962e-05	5.41118e-05	7.37339e-06	1.8366e-06	0	Bacteria;Proteobacteria;Epsilonproteobacteria;Campylobacterales;Helicobacteraceae;Sulfurovum;uncultured bacterium
g_test	py_mrc	JN662083.1.1394	4289.18	0	4	1.90195e-06	0	0.00019862	0.0210824	0.000444247	0	0	Bacteria;Proteobacteria;Gammaproteobacteria;Methylococcales;Marine Methylotrophic Group 2
g_test	py_mrc	AB842295.1.1433	3782.97	0	6	0.019651	0.0148	0.000103628	0.00315495	0.000291249	9.18302e-06	0	Bacteria;Proteobacteria;Epsilonproteobacteria;Campylobacterales;Helicobacteraceae;Sulfurovum;uncultured bacterium
g_test	py_mrc	AY531572.1.1473	3765.75	0	6	0.0477789	0.00598222	0.00199916	0.00793091	0.000923518	9.18302e-06	0	Bacteria;Proteobacteria;Epsilonproteobacteria;Campylobacterales;Helicobacteraceae;Sulfurovum;uncultured bacterium
g_test	py_mrc	AB476216.1.1305	3736.52	0	4	0	0	0	0.00152219	0.0238198	0.00337568	0.00202879	Bacteria;Proteobacteria;Alphaproteobacteria;Rhizobiales;Phyllobacteriaceae
g_test	py_mrc	JQ287080.1.1521	3701.46	0	4	0.000117921	0	0	0.000185862	0.0250695	0.00367137	0	Bacteria;Proteobacteria;Deltaproteobacteria;Desulfobacterales;Desulfobulbaceae;Desulfobulbus;uncultured bacterium
g_test	py_mrc	New.ReferenceOTU1473	3597.25	0	4	0	0	0	7.76387e-05	0.0236354	0.00328752	1.61015e-05	Bacteria;Proteobacteria;Gammaproteobacteria;Xanthomonadales;JTB255 marine benthic group
g_test	py_mrc	FN562824.1.1388	3359.15	0	4	0	0	0	0.000103518	0.013427	3.67321e-06	8.05075e-05	Bacteria;Proteobacteria;Gammaproteobacteria;Order Incertae Sedis;Family Incertae Sedis;Marinicella;uncultured gamma proteobacterium
g_test	py_mrc	New.ReferenceOTU1008	3348.31	0	5	0.000131235	2.71261e-05	0	0.00281617	0.0120186	1.8366e-06	0	Bacteria;Proteobacteria;Gammaproteobacteria;Order Incertae Sedis;Family Incertae Sedis;Marinicella;uncultured bacterium
g_test	py_mrc	New.ReferenceOTU1895	3315.7	0	4	0.0183881	8.13784e-05	1.07946e-05	1.41161e-05	0	0	0	Bacteria;Proteobacteria;Epsilonproteobacteria;Campylobacterales;Helicobacteraceae;Sulfurimonas;uncultured bacterium
g_test	py_mrc	New.ReferenceOTU1912	3286.31	0	7	1.14117e-05	9.04205e-06	2.15892e-06	0.00331494	0.0115449	7.34642e-06	0.00146524	Bacteria;Proteobacteria;Alphaproteobacteria;Rhodobacterales;Rhodobacteraceae
g_test	py_mrc	KC294233.1.1370	3214.6	0	4	0	0	2.15892e-06	0	7.37339e-06	0.0171667	4.83045e-05	Bacteria;Actinobacteria;Actinobacteria;Micrococcales;Micrococcaceae;Kocuria
g_test	py_mrc	New.ReferenceOTU2391	3146.47	0	5	0.018797	9.40373e-05	0.000172713	7.05806e-06	2.21202e-05	0	0	Bacteria;Proteobacteria;Deltaproteobacteria;Desulfurellales;Desulfurellaceae;Hippea
g_test	py_mrc	DQ395426.1.1417	3046.58	0	4	0	0	0	0.000112929	0.0123762	1.8366e-06	0.000386436	Bacteria;Proteobacteria;Alphaproteobacteria;Caulobacterales;Hyphomonadaceae;uncultured
g_test	py_mrc	New.ReferenceOTU1045	3026.3	0	5	5.32546e-05	0	0	0.00112458	0.0138528	1.8366e-06	0.0053135	Bacteria;Bacteroidetes;Flavobacteriia;Flavobacteriales;Flavobacteriaceae;uncultured;uncultured Bacteroidetes bacterium
g_test	py_mrc	AF449223.1.1378	3024.92	0	5	6.08624e-05	3.61682e-06	0	0.0141938	0.00137698	0	4.83045e-05	Bacteria;Proteobacteria;Alphaproteobacteria;Rhodobacterales;Rhodobacteraceae;Roseobacter clade NAC11-7 lineage;uncultured alpha proteobacterium
g_test	py_mrc	JX527407.1.1423	2958.2	0	6	1.90195e-06	1.80841e-06	0.00019862	0.0140385	0.000683882	0	1.61015e-05	Bacteria;Bacteroidetes;Flavobacteriia;Flavobacteriales;Flavobacteriaceae;uncultured
g_test	py_mrc	DQ456289.1.1457	2905.03	0	6	1.90195e-06	3.61682e-06	0.000142489	0	1.47468e-05	0.016647	8.05075e-05	Bacteria;Proteobacteria;Gammaproteobacteria;Enterobacteriales;Enterobacteriaceae;Enterobacter;uncultured bacterium
g_test	py_mrc	New.ReferenceOTU1840	2874.61	0	6	1.90195e-06	0	0.000174872	0.00725333	0.00568673	1.8366e-06	1.61015e-05	Bacteria;Proteobacteria;Gammaproteobacteria;Methylococcales
g_test	py_mrc	DQ228627.1.1360	2722.35	0	4	0.00959534	0.0274734	0.00721726	2.11742e-05	0	0	0	Archaea;Euryarchaeota;Archaeoglobi;Archaeoglobales;Archaeoglobaceae;uncultured;uncultured archaeon
g_test	py_mrc	New.ReferenceOTU979	2701.6	0	5	3.8039e-06	0	8.20389e-05	0.00523943	0.00666739	0	3.2203e-05	Bacteria;Proteobacteria;Gammaproteobacteria;Thiotrichales;Piscirickettsiaceae;Marine Methylotrophic Group 3;uncultured gamma proteobacterium
g_test	py_mrc	AY280410.1.1408	2677.1	0	5	0.011988	0.00278676	6.47675e-06	9.41075e-06	3.6867e-06	0	0	Bacteria;Proteobacteria;Epsilonproteobacteria;Campylobacterales;Campylobacteraceae;Thiofractor;uncultured bacterium
g_test	py_mrc	FJ497650.1.1461	2546.39	0	4	0	0	0	1.88215e-05	0.000383416	3.30589e-05	0.143158	Bacteria;Proteobacteria;Gammaproteobacteria;Thiotrichales;Thiotrichaceae;uncultured;uncultured sediment bacterium
g_test	py_mrc	New.ReferenceOTU190	2526.7	0	5	0	0	1.94303e-05	0.00118811	7.18906e-05	0.0192274	0.000144914	Bacteria;Proteobacteria;Deltaproteobacteria;Desulfobacterales;Desulfobulbaceae;Desulfobulbus;uncultured bacterium
g_test	py_mrc	New.ReferenceOTU883	2473.8	0	5	0.0137074	3.61682e-06	6.47675e-06	4.70537e-06	0	1.8366e-06	0	Bacteria;Proteobacteria;Epsilonproteobacteria;Nautiliales;Nautiliaceae;Caminibacter
g_test	py_mrc	New.ReferenceOTU1543	2462.12	0	4	0	0	0	2.35269e-05	0.00983979	1.8366e-06	1.61015e-05	Bacteria;Proteobacteria;Gammaproteobacteria;Methylococcales;Marine Methylotrophic Group 2
g_test	py_mrc	JN662285.1.1386	2451.5	0	6	0.0157386	0.00113026	0.000507346	4.94064e-05	2.21202e-05	1.8366e-06	0	Bacteria;Proteobacteria;Epsilonproteobacteria;Campylobacterales;Helicobacteraceae;Sulfurovum
g_test	py_mrc	New.ReferenceOTU1032	2426.94	0	5	0	0	0.000138171	0.000766976	0.0135652	1.8366e-06	0.0127363	Bacteria;Bacteroidetes;Flavobacteriia;Flavobacteriales;Flavobacteriaceae
g_test	py_mrc	KC682271.1.1447	2418.71	0	5	0.000121725	1.80841e-06	0.000105787	0.0093284	0.00290696	0	0	Bacteria;Proteobacteria;Alphaproteobacteria;Rhodobacterales;Rhodobacteraceae;Roseobacter clade NAC11-7 lineage;uncultured alpha proteobacterium
g_test	py_mrc	New.ReferenceOTU37	2286.57	0	6	5.70585e-06	0	0.000155442	0.0114764	9.95408e-05	1.8366e-06	4.83045e-05	Bacteria;Proteobacteria;Gammaproteobacteria;Thiotrichales;Thiotrichaceae;uncultured;uncultured bacterium
g_test	py_mrc	AY531562.1.1495	2261.61	0	4	0.0124825	0.000162757	0	2.35269e-06	1.65901e-05	0	0	Bacteria;Bacteroidetes;Flavobacteriia;Flavobacteriales;R103-B20;uncultured bacterium;uncultured bacterium
g_test	py_mrc	KC682834.1.1417	2110.13	0	4	0	0	4.31784e-06	0.00110106	0.00869876	0	0.0021737	Bacteria;Proteobacteria;Alphaproteobacteria;Caulobacterales;Hyphomonadaceae;Robiginitomaculum;uncultured bacterium
g_test	py_mrc	New.ReferenceOTU677	2106.46	0	5	0.00987112	0.00217913	6.04497e-05	7.05806e-06	0	7.34642e-06	0	Bacteria;Proteobacteria;Epsilonproteobacteria;Nautiliales;Nautiliaceae;Thioreductor
g_test	py_mrc	New.ReferenceOTU2465	2106.1	0	4	0.0116418	3.61682e-06	4.31784e-06	2.35269e-06	0	0	0	Bacteria;Proteobacteria;Epsilonproteobacteria;Campylobacterales;Helicobacteraceae;Sulfurimonas;uncultured bacterium
g_test	py_mrc	New.ReferenceOTU672	2106	0	4	1.90195e-06	1.80841e-06	0.00987273	9.41075e-06	0	0	0	Bacteria;Thermodesulfobacteria;Thermodesulfobacteria;Thermodesulfobacteriales;Thermodesulfobacteriaceae;uncultured Thermodesulfobacteriaceae bacterium;uncultured Thermodesulfobacteriaceae bacterium
g_test	py_mrc	AB440165.1.1431	2098.53	0	6	0.000102705	2.89346e-05	4.31784e-06	0.00663458	0.00405168	0	0.000434741	Bacteria;Proteobacteria;Epsilonproteobacteria;Campylobacterales;Helicobacteraceae;Sulfurovum;uncultured bacterium
g_test	py_mrc	New.ReferenceOTU1253	2022.79	0	5	3.8039e-06	3.0743e-05	0.00972593	9.41075e-06	0	1.8366e-06	0	Bacteria;Proteobacteria;Deltaproteobacteria;Desulfovibrionales;Desulfohalobiaceae;Desulfothermus
g_test	py_mrc	New.ReferenceOTU105	1967.03	0	5	3.8039e-06	3.61682e-06	0.00920779	5.88172e-05	1.84335e-06	0	0	Bacteria;Proteobacteria;Epsilonproteobacteria;Campylobacterales;Helicobacteraceae;Sulfurovum;uncultured bacterium
g_test	py_mrc	New.ReferenceOTU2137	1931.89	0	4	0.0106072	0.000698046	8.20389e-05	4.70537e-06	0	0	0	Unassigned
g_test	py_mrc	AB238959.1.1410	1901.47	0	4	0	0	4.10194e-05	0.00171981	0.00622314	1.8366e-06	0	Bacteria;Proteobacteria;Gammaproteobacteria;BD7-8 marine group
g_test	py_mrc	New.ReferenceOTU1938	1870.19	0	5	1.90195e-06	3.61682e-06	0.00874578	4.23484e-05	9.21674e-06	0	0	Bacteria;Aquificae;Aquificae;Aquificales;Desulfurobacteriaceae;Desulfurobacterium
g_test	py_mrc	FJ937713.1.1224	1855.67	0	5	1.90195e-06	0	0.000123058	0.007091	0.00177699	0	1.61015e-05	Bacteria;Proteobacteria;Gammaproteobacteria;Methylococcales;Marine Methylotrophic Group 2;uncultured bacterium;uncultured bacterium
g_test	py_mrc	New.ReferenceOTU2005	1818.84	0	4	0	0	0	0.00942957	5.53005e-05	1.8366e-06	0.000225421	Bacteria;Bacteroidetes;Flavobacteriia;Flavobacteriales;Flavobacteriaceae;Tenacibaculum
g_test	py_mrc	EU491713.1.1444	1792.83	0	4	0	0	0	3.05849e-05	0.00999464	0.000830145	0.000225421	Bacteria;Bacteroidetes;Flavobacteriia;Flavobacteriales;Flavobacteriaceae;Maritimimonas
g_test	py_mrc	New.ReferenceOTU1662	1773.93	0	4	1.90195e-06	1.80841e-06	0.00829456	3.7643e-05	0	0	0	Unassigned
g_test	py_mrc	GQ903355.1.1494	1742.55	0	4	1.90195e-06	0	9.06746e-05	0.00223976	0.00513926	0	0	Bacteria;Proteobacteria;Gammaproteobacteria;Thiotrichales;Piscirickettsiaceae;endosymbionts;uncultured bacterium
g_test	py_mrc	FM165250.1.1493	1735.34	0	4	0	0	4.31784e-06	0.000348198	0.00720934	0	0.000933887	Bacteria;Bacteroidetes;Flavobacteriia;Flavobacteriales;Flavobacteriaceae;Lutibacter
g_test	py_mrc	AB181499.1.1451	1726.1	0	6	0.00123437	9.04205e-05	7.988e-05	0.00619933	0.00583973	1.46928e-05	0	Bacteria;Proteobacteria;Epsilonproteobacteria;Campylobacterales;Helicobacteraceae;Sulfurimonas;uncultured bacterium
g_test	py_mrc	New.ReferenceOTU1263	1723.1	0	4	0.0113451	0.000164565	0.00031952	0	5.53005e-06	0	0	Bacteria;Proteobacteria;Epsilonproteobacteria;Nautiliales;Nautiliaceae;Nitratifractor;uncultured bacterium
g_test	py_mrc	New.CleanUp.ReferenceOTU506940	1722.07	0	4	0	0	2.15892e-06	0.00124928	0.0182307	0.00618936	0	Bacteria;Proteobacteria;Gammaproteobacteria;Thiotrichales;Piscirickettsiaceae;endosymbionts;uncultured bacterium
g_test	py_mrc	New.ReferenceOTU544	1714.37	0	4	0.000523036	0.00958276	2.15892e-06	0.000174099	0	0	0	Bacteria;Proteobacteria;Epsilonproteobacteria;Campylobacterales;Helicobacteraceae;Sulfurimonas;uncultured bacterium
g_test	py_mrc	FN562844.1.1365	1684.45	0	7	0.0215472	0.00649581	0.000610974	0.00408191	0.00180832	4.22419e-05	8.05075e-05	Bacteria;Proteobacteria;Epsilonproteobacteria;Campylobacterales;Helicobacteraceae;Sulfurovum;uncultured epsilon proteobacterium
g_test	py_mrc	HQ153930.1.1376	1677.41	0	4	1.90195e-06	0	2.15892e-06	0.00682985	0.00135855	0	0	Bacteria;Proteobacteria;Alphaproteobacteria;Rhizobiales
g_test	py_mrc	New.ReferenceOTU1489	1664.47	0	4	0.00898101	0.000269453	8.63567e-06	0	1.84335e-06	0	0	Bacteria;Proteobacteria;Epsilonproteobacteria;Nautiliales;Nautiliaceae;Nitratifractor
g_test	py_mrc	JF155704.1.1375	1661.04	0	4	0	0	4.74962e-05	0	5.53005e-06	0.00927485	1.61015e-05	Bacteria;Proteobacteria;Gammaproteobacteria;Pseudomonadales;Moraxellaceae;Enhydrobacter
g_test	py_mrc	New.ReferenceOTU331	1594.28	0	4	3.8039e-06	0	7.988e-05	0.00797796	7.55773e-05	0	0	Bacteria;Bacteroidetes;Flavobacteriia;Flavobacteriales;Flavobacteriaceae;Lutibacter
g_test	py_mrc	New.ReferenceOTU1257	1593	0	5	1.90195e-06	0	0.000196462	0.00631226	0.00132721	9.18302e-06	0	Bacteria;Proteobacteria;Gammaproteobacteria;Methylococcales;IheB2-23;uncultured bacterium;uncultured bacterium
g_test	py_mrc	JF320726.1.1466	1588.1	0	5	3.8039e-06	0	0	0.000715217	0.00811811	1.8366e-06	0.00592535	Bacteria;Proteobacteria;Gammaproteobacteria;Order Incertae Sedis;Family Incertae Sedis;Marinicella;uncultured bacterium
g_test	py_mrc	JN662209.1.1349	1577.48	0	7	0.0040968	0.0276144	1.29535e-05	0.00971189	0.000224889	5.50981e-06	0.000837278	Bacteria;Proteobacteria;Epsilonproteobacteria;Campylobacterales;Helicobacteraceae;Sulfurimonas;uncultured bacterium
g_test	py_mrc	JF076235.1.1372	1506.44	0	5	7.6078e-06	0	0.000146806	0	3.6867e-06	0.00903426	3.2203e-05	Bacteria;Firmicutes;Bacilli;Bacillales;Staphylococcaceae;Staphylococcus
g_test	py_mrc	JF214014.1.1341	1503.57	0	4	0	0	9.71513e-05	0	3.6867e-06	0.0087404	1.61015e-05	Bacteria;Actinobacteria;Actinobacteria;Propionibacteriales;Propionibacteriaceae;Propionibacterium;uncultured bacterium
g_test	py_mrc	New.ReferenceOTU1138	1441.83	0	5	0	0	7.55621e-05	0.00128457	0.00963334	0.00191558	4.83045e-05	Bacteria;Proteobacteria;Gammaproteobacteria;Chromatiales;Ectothiorhodospiraceae;Acidiferrobacter;uncultured bacterium
g_test	py_mrc	FR852993.1.1458	1437.01	0	6	0.00772002	0.00158055	0.000200779	2.58796e-05	3.6867e-06	9.18302e-06	0	Bacteria;Proteobacteria;Epsilonproteobacteria;Campylobacterales;Helicobacteraceae;Sulfurovum
g_test	py_mrc	New.ReferenceOTU2365	1436.08	0	4	1.52156e-05	9.04205e-06	0.00689558	2.35269e-06	0	0	0	Bacteria;Proteobacteria;Epsilonproteobacteria;Nautiliales;Nautiliaceae;Nitratifractor;uncultured bacterium
g_test	py_mrc	FJ792087.1.1341	1420.64	0	4	0.00417098	0.00405626	0	7.05806e-05	1.10601e-05	0	0	Bacteria;BD1-5;uncultured bacterium;uncultured bacterium;uncultured bacterium;uncultured bacterium;uncultured bacterium
g_test	py_mrc	AY251063.1.1482	1393.54	0	5	0.00910654	0.000311046	0.000287136	2.35269e-06	0	5.50981e-06	0	Bacteria;Proteobacteria;Epsilonproteobacteria;Nautiliales;Nautiliaceae;Nitratifractor;uncultured bacterium
g_test	py_mrc	GU061224.1.1423	1385.46	0	6	0.000100803	1.98925e-05	3.23838e-05	0.0036302	0.00327379	0	8.05075e-05	Bacteria;Bacteroidetes;Flavobacteriia;Flavobacteriales;Cryomorphaceae;Fluviicola;uncultured bacterium
g_test	py_mrc	New.ReferenceOTU1042	1306.47	0	4	1.90195e-06	0	8.63567e-06	0.00644166	0.000176961	0	0	Bacteria;Proteobacteria;Deltaproteobacteria;Desulfobacterales;Desulfobulbaceae;MSBL7
g_test	py_mrc	New.ReferenceOTU1053	1279.4	0	5	0	3.61682e-06	0	0.000256443	0.0134601	0.00367505	0.00449232	Bacteria;Proteobacteria;Gammaproteobacteria;Chromatiales;Ectothiorhodospiraceae;Acidiferrobacter;uncultured bacterium
g_test	py_mrc	KC682597.1.1256	1270.33	0	6	1.52156e-05	7.23364e-06	0	0.000985776	0.00446275	1.8366e-06	1.61015e-05	Bacteria;Proteobacteria;Alphaproteobacteria;Rhodobacterales;Rhodobacteraceae
g_test	py_mrc	New.ReferenceOTU1608	1269.1	0	4	0	0	0	3.29376e-05	0.00565171	1.8366e-06	0.001111	Bacteria;Proteobacteria;Alphaproteobacteria;DB1-14;uncultured bacterium;uncultured bacterium;uncultured bacterium
g_test	py_mrc	CP002205.2120484.2121990	1225.25	0	6	0.00220816	0.00463315	2.15892e-06	2.82322e-05	1.10601e-05	0	0.000128812	Bacteria;Proteobacteria;Epsilonproteobacteria;Campylobacterales;Helicobacteraceae;Sulfurimonas
g_test	py_mrc	New.ReferenceOTU1525	1224.79	0	5	0	0	3.88605e-05	0.00172687	0.00869876	0.00217087	1.61015e-05	Bacteria;Bacteroidetes;Cytophagia;Cytophagales;Flammeovirgaceae
g_test	py_mrc	DQ270646.1.1488	1201.85	0	4	0	0	0	0.000348198	0.00458072	3.67321e-06	3.2203e-05	Bacteria;Proteobacteria;Alphaproteobacteria;Rhizobiales;Phyllobacteriaceae;Pseudahrensia;uncultured bacterium
g_test	py_mrc	New.ReferenceOTU234	1151.89	0	5	3.8039e-06	1.80841e-06	0.00538218	5.41118e-05	3.6867e-06	0	0	Bacteria;Proteobacteria;Epsilonproteobacteria;Campylobacterales;Helicobacteraceae;Sulfurovum;uncultured bacterium
g_test	py_mrc	New.ReferenceOTU911	1144.32	0	5	0.006925	9.04205e-06	4.31784e-06	2.35269e-06	6.63605e-05	0	0	Bacteria;Proteobacteria;Deltaproteobacteria;Desulfobacterales;Desulfobulbaceae;Desulfobulbus;uncultured delta proteobacterium
g_test	py_mrc	AB476274.1.1400	1136.95	0	4	0	0	0.000168396	0.00515003	0.000376043	0	1.61015e-05	Bacteria;Proteobacteria;Alphaproteobacteria;Caulobacterales;Hyphomonadaceae;Robiginitomaculum;uncultured bacterium
g_test	py_mrc	New.ReferenceOTU2432	1127.13	0	4	9.50975e-06	0.000457528	0.00718056	0	3.6867e-06	0	0	Bacteria;Proteobacteria;Epsilonproteobacteria;Nautiliales;Nautiliaceae;Nautilia
g_test	py_mrc	HQ153847.1.1358	1126.89	0	5	1.52156e-05	9.04205e-06	0.0054599	9.41075e-06	0	3.67321e-06	0	Bacteria;Proteobacteria;Epsilonproteobacteria;Campylobacterales;Helicobacteraceae;Sulfurovum;uncultured bacterium
g_test	py_mrc	FJ192817.1.1458	1123.6	0	4	0	0	0.000222369	0	1.84335e-06	0.00730601	3.2203e-05	Bacteria;Proteobacteria;Betaproteobacteria;Burkholderiales;Comamonadaceae;Delftia;Delftia tsuruhatensis
g_test	py_mrc	New.ReferenceOTU2518	1104.63	0	5	1.90195e-06	0	0	4.94064e-05	0.00481114	7.53008e-05	9.6609e-05	Bacteria;Proteobacteria;Gammaproteobacteria;Order Incertae Sedis;Family Incertae Sedis;Marinicella
g_test	py_mrc	HQ757403.1.1452	1103.89	0	5	1.90195e-06	0	1.29535e-05	0	3.6867e-06	0.00602039	1.61015e-05	Bacteria;Proteobacteria;Gammaproteobacteria;Enterobacteriales;Enterobacteriaceae;Enterobacter
g_test	py_mrc	New.CleanUp.ReferenceOTU427269	1097.69	0	4	1.90195e-06	0	6.90854e-05	0.0053406	0.000154841	0	0	Bacteria;Bacteroidetes;Flavobacteriia;Flavobacteriales;Flavobacteriaceae;Lutibacter;uncultured bacterium
g_test	py_mrc	New.ReferenceOTU1672	1024.29	0	4	0	0	2.80659e-05	0.0022727	0.002424	0	0.000193218	Bacteria;Proteobacteria;Alphaproteobacteria;Rhizobiales;Hyphomicrobiaceae;Filomicrobium;uncultured bacterium
g_test	py_mrc	New.ReferenceOTU2231	974.241	0	5	4.75488e-05	0	2.5907e-05	0.00303967	0.00244981	0.000202027	0	Bacteria;Bacteroidetes;Flavobacteriia;Flavobacteriales;Flavobacteriaceae;uncultured
g_test	py_mrc	JN662115.1.1362	971.283	0	4	1.52156e-05	0	0	0.000159983	0.00387103	0	3.2203e-05	Bacteria;Proteobacteria;Epsilonproteobacteria;Campylobacterales;Helicobacteraceae;Sulfurovum;uncultured bacterium
g_test	py_mrc	JN662174.1.1366	958.846	0	4	6.84702e-05	0	0.00482302	3.29376e-05	2.39635e-05	0	0	Bacteria;Proteobacteria;Epsilonproteobacteria;Campylobacterales;Helicobacteraceae;Sulfurovum;uncultured bacterium
g_test	py_mrc	JN873958.1.1467	954.453	0	6	0.000182587	0.000106696	6.26086e-05	0.00443952	0.00137145	0	8.05075e-05	Bacteria;Proteobacteria;Epsilonproteobacteria;Campylobacterales;Helicobacteraceae;Sulfurovum;uncultured bacterium
g_test	py_mrc	GU940889.1.1356	941.143	0	6	7.6078e-06	9.04205e-06	0.000131694	0	3.6867e-06	0.00584775	6.4406e-05	Bacteria;Proteobacteria;Gammaproteobacteria;Pseudomonadales;Pseudomonadaceae;uncultured;uncultured bacterium
g_test	py_mrc	New.ReferenceOTU1676	927.181	0	5	0.000102705	0	3.45427e-05	0.00242797	0.00297701	0.000238759	0	Bacteria;Bacteroidetes;Flavobacteriia;Flavobacteriales;Flavobacteriaceae;uncultured;uncultured bacterium
g_test	py_mrc	JQ287046.1.1504	918.777	0	5	0	1.80841e-06	4.10194e-05	0.000487006	0.00328116	1.8366e-06	0	Bacteria;Proteobacteria;Gammaproteobacteria;Thiotrichales;Thiotrichaceae;uncultured;uncultured bacterium
g_test	py_mrc	JQ287071.1.1470	914.647	0	7	0.000880603	0.000963882	0.000103628	0.00996833	5.53005e-06	1.8366e-06	4.83045e-05	Bacteria;Proteobacteria;Epsilonproteobacteria;Campylobacterales;Helicobacteraceae;Sulfurovum;uncultured epsilon proteobacterium
g_test	py_mrc	DQ146934.1.1433	910.2	0	4	0	1.80841e-06	0	0	3.6867e-06	0.00487068	4.83045e-05	Bacteria;Proteobacteria;Gammaproteobacteria;Vibrionales;Vibrionaceae;Photobacterium;Photobacterium leiognathi
g_test	py_mrc	JQ287230.1.1441	905.647	0	4	0	0	3.02249e-05	0.00314554	0.00132537	0	0.000305929	Bacteria;Proteobacteria;Alphaproteobacteria;Caulobacterales;Hyphomonadaceae;Robiginitomaculum;uncultured bacterium
g_test	py_mrc	New.ReferenceOTU2002	893.138	0	4	0	0	0	0.000223505	0.00616416	0.00103585	3.2203e-05	Bacteria;Proteobacteria;Gammaproteobacteria;Order Incertae Sedis;Family Incertae Sedis;Marinicella;uncultured bacterium
g_test	py_mrc	FJ628316.1.1523	883.691	0	4	1.33137e-05	0	2.15892e-06	0.00404192	0.00044609	0	0	Bacteria;Proteobacteria;Deltaproteobacteria;Desulfobacterales;Desulfobulbaceae;Desulfocapsa;uncultured delta proteobacterium
g_test	py_mrc	FR744471.1.1447	874.598	0	5	4.37449e-05	1.80841e-06	0	0.000329376	0.00361849	0	0.000305929	Bacteria;Bacteroidetes;Flavobacteriia;Flavobacteriales;Flavobacteriaceae;uncultured
g_test	py_mrc	GU061084.1.1385	874.542	0	4	2.09215e-05	1.44673e-05	0	0.000141161	0.00357978	0	0	Bacteria;Proteobacteria;Alphaproteobacteria;Rhodobacterales;Rhodobacteraceae
g_test	py_mrc	New.ReferenceOTU1738	866.237	0	5	0.00630306	0.00126046	0.000630404	2.35269e-06	0	3.67321e-06	0	Bacteria;Proteobacteria;Epsilonproteobacteria;Nautiliales;Nautiliaceae;Thioreductor
g_test	py_mrc	HQ588379.1.1373	845.496	0	5	8.17839e-05	5.42523e-06	0.00410842	0.000261148	6.63605e-05	0	0	Bacteria;Proteobacteria;Epsilonproteobacteria;Campylobacterales;Helicobacteraceae;Sulfurovum;uncultured bacterium
g_test	py_mrc	GQ433956.1.1444	839.977	0	5	0.00581046	3.61682e-06	2.15892e-06	9.41075e-06	0.000162215	0	0	Bacteria;Bacteroidetes;VC2,1 Bac22;uncultured bacterium;uncultured bacterium;uncultured bacterium;uncultured bacterium
g_test	py_mrc	AB476192.1.1399	836.916	0	4	0	0	1.94303e-05	0.000298791	0.00323508	0	0.00020932	Bacteria;Proteobacteria;Alphaproteobacteria;Caulobacterales;Hyphomonadaceae;Robiginitomaculum;uncultured bacterium
g_test	py_mrc	AB842279.1.1433	820.019	0	7	2.28234e-05	1.98925e-05	9.93102e-05	0.00403486	0.000289406	5.50981e-06	1.61015e-05	Bacteria;Proteobacteria;Epsilonproteobacteria;Campylobacterales;Helicobacteraceae;Sulfurovum;uncultured Sulfurovum sp,
g_test	py_mrc	AY531606.1.1440	810.458	0	6	1.90195e-06	0	0.000431784	0.0002188	0.00273737	1.8366e-06	1.61015e-05	Bacteria;Proteobacteria;Epsilonproteobacteria;Campylobacterales;Campylobacteraceae;Campylobacter;uncultured bacterium
g_test	py_mrc	New.ReferenceOTU761	800.852	0	5	1.14117e-05	1.80841e-06	0.000183508	0.00243738	0.00121661	0	0	Bacteria;Bacteroidetes;Flavobacteriia;Flavobacteriales;Flavobacteriaceae;uncultured Bacteroidetes bacterium;uncultured Bacteroidetes bacterium
g_test	py_mrc	FN554145.1.1470	788.148	0	6	0.00591697	3.9785e-05	0.000114423	0.000176451	2.58069e-05	1.8366e-06	0	Bacteria;Proteobacteria;Epsilonproteobacteria;Campylobacterales;Helicobacteraceae;Sulfurovum
g_test	py_mrc	EU050875.1.1358	761.553	0	4	0	0	0	0.000425836	0.00425076	1.8366e-06	0.00436351	Bacteria;Planctomycetes;Phycisphaerae;Phycisphaerales;Phycisphaeraceae;SM1A02;uncultured bacterium
g_test	py_mrc	EF687341.1.1355	751.647	0	6	0.000601016	0.000220626	1.29535e-05	0.00552881	0.000855314	1.8366e-06	0	Bacteria;Proteobacteria;Epsilonproteobacteria;Campylobacterales;Helicobacteraceae;Sulfurimonas;uncultured sediment bacterium
g_test	py_mrc	AB476180.1.1417	720.703	0	5	3.8039e-06	0	0	0.000265854	0.0101974	1.8366e-06	0.0374682	Bacteria;Proteobacteria;Alphaproteobacteria;OCS116 clade;uncultured bacterium;uncultured bacterium;uncultured bacterium
g_test	py_mrc	JN662233.1.1483	711.429	0	6	0.000119823	0	2.37481e-05	0.000717569	0.00207192	5.50981e-06	0.107542	Bacteria;Bacteroidetes;Flavobacteriia;Flavobacteriales;Flavobacteriaceae;uncultured Bacteroidetes bacterium;uncultured Bacteroidetes bacterium
g_test	py_mrc	New.CleanUp.ReferenceOTU234817	704.166	0	5	0	0	3.88605e-05	0.00124928	0.0018286	1.8366e-06	1.61015e-05	Bacteria;Proteobacteria;Gammaproteobacteria;Thiotrichales;Piscirickettsiaceae;endosymbionts;uncultured bacterium
g_test	py_mrc	New.ReferenceOTU2124	690.809	0	5	0.000346155	3.61682e-06	1.07946e-05	0.00161865	0.00260465	0	0	Bacteria;Bacteroidetes;Flavobacteriia;Flavobacteriales;Flavobacteriaceae;uncultured
g_test	py_mrc	New.CleanUp.ReferenceOTU484698	686.745	0	5	0.00218915	0.00241784	2.15892e-06	0.000171746	0	1.8366e-06	0	Bacteria;Proteobacteria;Epsilonproteobacteria;Campylobacterales;Helicobacteraceae;Sulfurimonas;uncultured bacterium
g_test	py_mrc	New.ReferenceOTU439	684.649	0	4	3.42351e-05	0	0	0.00353138	0.000173275	0	4.83045e-05	Bacteria;Bacteroidetes;Flavobacteriia;Flavobacteriales;Flavobacteriaceae;Lutibacter;uncultured Bacteroidetes bacterium
g_test	py_mrc	CP001857.1049930.1051439	683.819	0	5	1.90195e-06	0.00236359	0.00879759	2.35269e-05	1.65901e-05	0	0	Archaea;Euryarchaeota;Archaeoglobi;Archaeoglobales;Archaeoglobaceae;Archaeoglobus
g_test	py_mrc	FM165259.1.1482	675.205	0	5	8.55878e-05	0.000137439	0.00113559	0.0030632	0.000140094	0	0	Bacteria;Proteobacteria;Epsilonproteobacteria;Campylobacterales;Helicobacteraceae;Sulfurovum;uncultured bacterium
g_test	py_mrc	New.ReferenceOTU2448	663.1	0	4	0	0	0	0.000651694	0.00216593	1.8366e-06	1.61015e-05	Unassigned
g_test	py_mrc	JX310176.1.1425	658.949	0	4	0	0	0	1.17634e-05	2.94936e-05	1.8366e-06	0.033636	Bacteria;Proteobacteria;Alphaproteobacteria;Rhodobacterales;Rhodobacteraceae
g_test	py_mrc	AY370187.1.1454	651.845	0	5	0	5.42523e-06	7.988e-05	0	5.53005e-06	0.00402033	1.61015e-05	Bacteria;Proteobacteria;Alphaproteobacteria;Rhizobiales;Brucellaceae
g_test	py_mrc	JN662165.1.1232	651.742	0	5	0.00385525	0.000421359	0.000110105	0	1.84335e-06	5.50981e-06	0	Bacteria;Proteobacteria;Epsilonproteobacteria;Campylobacterales;Helicobacteraceae;Sulfurovum;uncultured epsilon proteobacterium
g_test	py_mrc	AB476228.1.1464	638.354	0	5	4.94507e-05	5.42523e-06	6.47675e-06	0.00218565	0.00109495	0	0	Bacteria;Proteobacteria;Gammaproteobacteria;Thiotrichales;Thiotrichaceae;uncultured;uncultured bacterium
g_test	py_mrc	AB858629.1.1389	626.149	0	4	0.000203509	1.80841e-06	0	0.000755212	0.00264152	0	0	Bacteria;Spirochaetae;Spirochaetes;Spirochaetales;Spirochaetaceae;Spirochaeta;uncultured bacterium
g_test	py_mrc	New.ReferenceOTU1380	623.646	0	4	0.0028282	0.000781233	2.37481e-05	2.35269e-06	0	0	0	Bacteria;Proteobacteria;Epsilonproteobacteria;Campylobacterales;Helicobacteraceae;Sulfurovum
g_test	py_mrc	DQ415790.1.1470	619.795	0	5	1.71176e-05	1.80841e-05	6.04497e-05	0.00264677	0.000536414	0	0	Bacteria;Proteobacteria;Epsilonproteobacteria;Campylobacterales;Helicobacteraceae;Sulfurovum;uncultured bacterium
g_test	py_mrc	New.ReferenceOTU2318	596.097	0	5	1.90195e-06	0	0	0.000162335	0.00256225	5.50981e-06	0.000515248	Bacteria;Proteobacteria;Alphaproteobacteria;Caulobacterales;Hyphomonadaceae;Robiginitomaculum;uncultured bacterium
g_test	py_mrc	FJ497575.1.1344	590.769	0	4	0	0	0	3.05849e-05	3.6867e-06	5.50981e-06	0.0296751	Bacteria;Proteobacteria;Alphaproteobacteria;Rhodobacterales;Rhodobacteraceae;Pacificibacter;uncultured alpha proteobacterium
g_test	py_mrc	AY268936.1.1506	589.129	0	5	1.90195e-06	9.94625e-05	0.00327076	2.35269e-06	0	1.8366e-06	0	Bacteria;Aquificae;Aquificae;Aquificales;Desulfurobacteriaceae
g_test	py_mrc	New.ReferenceOTU1479	572.613	0	4	0	0	0	0.000141161	0.00274659	0.000123053	0.00020932	Bacteria;Bacteroidetes;Cytophagia;Cytophagales;Flammeovirgaceae;uncultured;uncultured bacterium
g_test	py_mrc	EU774572.1.1342	558.304	0	4	5.70585e-06	0	9.06746e-05	0	1.84335e-06	0.00353914	0	Bacteria;Cyanobacteria;Chloroplast
g_test	py_mrc	AX039566.8.1529	557.293	0	5	0	1.80841e-06	6.69265e-05	0	7.37339e-06	0.00344914	1.61015e-05	Bacteria;Proteobacteria;Gammaproteobacteria;Enterobacteriales;Enterobacteriaceae;Escherichia-Shigella
g_test	py_mrc	EF441900.1.1412	556.115	0	7	0.000958583	0.000372532	8.63567e-05	0.00547705	0.000774206	9.18302e-06	1.61015e-05	Bacteria;Proteobacteria;Epsilonproteobacteria;Campylobacterales;Helicobacteraceae;Sulfurimonas
g_test	py_mrc	JQ195940.1.1350	552.389	0	4	7.03722e-05	5.42523e-06	0	0.000809324	0.00190234	0	0	Bacteria;Bacteroidetes;Flavobacteriia;Flavobacteriales;Cryomorphaceae;Fluviicola;uncultured bacterium
g_test	py_mrc	FJ905673.1.1406	547.074	0	4	0	0	2.15892e-05	0.00339963	0.00198897	0.00106523	0	Bacteria;Proteobacteria;Zetaproteobacteria;Mariprofundales;Mariprofundaceae;Mariprofundus;uncultured bacterium
g_test	py_mrc	New.ReferenceOTU2430	531.474	0	4	0.000138842	0	0.0030635	2.58796e-05	9.21674e-06	0	0	Bacteria;Bacteroidetes;Flavobacteriia;Flavobacteriales;R103-B20;uncultured bacterium;uncultured bacterium
g_test	py_mrc	AF356635.1.1411	527.883	0	5	9.50975e-06	2.53177e-05	0.00267274	2.35269e-06	5.53005e-06	0	0	Archaea;Euryarchaeota;Thermoplasmata;Thermoplasmatales;Deep Sea Hydrothermal Vent Gp 2(DHVEG-2);uncultured archaeon;uncultured archaeon
g_test	py_mrc	New.ReferenceOTU2614	519.222	0	5	9.69995e-05	1.80841e-06	0.00289079	4.70537e-06	1.84335e-06	0	0	Bacteria;Candidate division OP9;uncultured bacterium;uncultured bacterium;uncultured bacterium;uncultured bacterium;uncultured bacterium
g_test	py_mrc	JN232988.1.1444	501.765	0	6	2.28234e-05	1.80841e-06	0	0.00162806	0.00311895	0.00100462	0.000112711	Bacteria;Bacteroidetes;Flavobacteriia;Flavobacteriales;Flavobacteriaceae;Polaribacter
g_test	py_mrc	New.ReferenceOTU2142	501.34	0	4	0.00261328	0.000179033	4.31784e-06	0	0	1.8366e-06	0	Bacteria;Proteobacteria;Epsilonproteobacteria;Nautiliales;Nautiliaceae;Thioreductor
g_test	py_mrc	New.ReferenceOTU224	481.664	0	4	1.90195e-06	0	0.00226039	9.41075e-06	1.84335e-06	0	0	Bacteria;Aquificae;Aquificae;Aquificales;Desulfurobacteriaceae
g_test	py_mrc	FN554151.1.1500	468.505	0	4	0	0	0	2.35269e-06	5.89872e-05	1.8366e-06	0.0257785	Bacteria;Proteobacteria;Gammaproteobacteria;Thiotrichales;Thiotrichaceae;uncultured;uncultured sediment bacterium
g_test	py_mrc	New.ReferenceOTU2434	463.87	0	4	0.000195901	0	0.00285193	7.05806e-06	7.00472e-05	0	0	Bacteria;Chloroflexi;Anaerolineae;Anaerolineales;Anaerolineaceae;uncultured;uncultured organism
g_test	py_mrc	JN873951.1.1482	451.626	0	5	4.75488e-05	1.80841e-06	0.00230357	6.11698e-05	1.47468e-05	0	0	Bacteria;Proteobacteria;Epsilonproteobacteria;Campylobacterales;Helicobacteraceae;Sulfurovum;uncultured bacterium
g_test	py_mrc	GU220732.1.1474	448.546	0	6	2.09215e-05	5.42523e-06	0	0.00249855	3.13369e-05	1.8366e-06	0.000112711	Bacteria;Proteobacteria;Epsilonproteobacteria;Campylobacterales;Helicobacteraceae;Sulfurovum;uncultured bacterium
g_test	py_mrc	FN562908.1.1347	437.485	0	4	0	0	4.31784e-06	0.000832851	0.00138067	0	0.000579654	Bacteria;Bacteroidetes;Flavobacteriia;Flavobacteriales;Flavobacteriaceae;uncultured
g_test	py_mrc	AF449251.1.1429	427.284	0	6	0.00286814	1.08505e-05	2.15892e-06	8.70494e-05	3.6867e-06	5.50981e-06	0	Bacteria;Proteobacteria;Epsilonproteobacteria;Campylobacterales;Helicobacteraceae;Sulfurovum
g_test	py_mrc	New.ReferenceOTU934	419.511	0	5	0	1.80841e-06	2.80659e-05	0.00151278	0.000534571	9.18302e-06	0	Bacteria;Proteobacteria;Zetaproteobacteria;Mariprofundales;Mariprofundaceae;Mariprofundus;uncultured bacterium
g_test	py_mrc	JN662133.1.1359	415.464	0	6	0.00291759	0.000311046	2.5907e-05	0.000119987	4.42404e-05	1.8366e-06	0	Bacteria;Proteobacteria;Epsilonproteobacteria;Campylobacterales;Helicobacteraceae;Sulfurovum;uncultured bacterium
g_test	py_mrc	EU772607.1.1332	402.838	0	5	1.90195e-06	0	3.45427e-05	0	1.84335e-06	0.00239677	1.61015e-05	Bacteria;Proteobacteria;Gammaproteobacteria;Enterobacteriales;Enterobacteriaceae;Enterobacter;uncultured bacterium
g_test	py_mrc	New.ReferenceOTU2209	393.753	0	4	3.8039e-06	0	6.90854e-05	0.00182333	0.000112444	0	0	Bacteria;Proteobacteria;Gammaproteobacteria;Thiotrichales;Thiotrichaceae;uncultured
g_test	py_mrc	AY531602.1.1475	385.431	0	6	0.000323332	2.35093e-05	1.29535e-05	0.00041172	0.00219174	0	8.05075e-05	Bacteria;Proteobacteria;Epsilonproteobacteria;Campylobacterales;Helicobacteraceae;Sulfurovum;uncultured bacterium
g_test	py_mrc	KC682623.1.1471	385.135	0	5	0	1.80841e-06	4.31784e-06	0.00184686	0.000145625	7.34642e-06	0	Bacteria;Bacteroidetes;Flavobacteriia;Flavobacteriales;Flavobacteriaceae;Lutibacter;uncultured bacterium
g_test	py_mrc	New.ReferenceOTU2264	383.092	0	5	0.00365175	0.000495504	0.000535412	4.70537e-06	0	1.8366e-06	0	Bacteria;Proteobacteria;Epsilonproteobacteria;Nautiliales;Nautiliaceae;Caminibacter
g_test	py_mrc	New.ReferenceOTU2205	368.136	0	4	0	0	0	0.000136456	0.00143044	7.34642e-06	3.2203e-05	Bacteria;Proteobacteria;Gammaproteobacteria;Order Incertae Sedis;Family Incertae Sedis;Marinicella;uncultured bacterium
g_test	py_mrc	FJ205286.1.1488	365.142	0	4	0	3.61682e-06	0	0	1.84335e-06	1.8366e-06	0.0171642	Bacteria;Proteobacteria;Gammaproteobacteria;Thiotrichales;Thiotrichaceae;uncultured
g_test	py_mrc	AB476178.1.1453	365.035	0	4	7.6078e-06	0	4.31784e-06	0.0013975	0.00040738	0	0	Bacteria;Proteobacteria;Gammaproteobacteria;Thiotrichales;Thiotrichaceae;Cocleimonas
g_test	py_mrc	JX529976.1.1421	357.848	0	4	2.47254e-05	1.80841e-06	0	0.000936369	0.000827664	0	0	Bacteria;Bacteroidetes;Flavobacteriia;Flavobacteriales;Cryomorphaceae;Crocinitomix;uncultured Crocinitomix sp,
g_test	py_mrc	New.ReferenceOTU556	352.626	0	4	3.8039e-06	3.61682e-06	1.72713e-05	0.0018398	0	0	0	Bacteria;Bacteroidetes;Flavobacteriia;Flavobacteriales;Flavobacteriaceae;Lutibacter;uncultured bacterium
g_test	py_mrc	New.ReferenceOTU1966	348.303	0	4	0.00220246	0	2.80659e-05	2.35269e-06	9.21674e-06	0	0	Bacteria;Bacteroidetes;VC2,1 Bac22
g_test	py_mrc	New.CleanUp.ReferenceOTU474543	343.276	0	5	0.00206362	3.43598e-05	2.15892e-06	1.41161e-05	1.10601e-05	0	0	Bacteria;Proteobacteria;Epsilonproteobacteria;Campylobacterales;Helicobacteraceae;Sulfurovum;uncultured bacterium
g_test	py_mrc	New.CleanUp.ReferenceOTU827390	342.599	0	4	0	3.61682e-06	2.15892e-06	0.00172922	3.87103e-05	0	0	Bacteria;Bacteroidetes;Flavobacteriia;Flavobacteriales;Flavobacteriaceae;uncultured
g_test	py_mrc	GU220765.1.1464	341.833	0	5	0	1.80841e-06	0	4.70537e-05	0.00165348	5.50981e-06	0.0607349	Bacteria;Proteobacteria;Alphaproteobacteria;OCS116 clade;uncultured bacterium;uncultured bacterium;uncultured bacterium
g_test	py_mrc	FJ628226.1.1466	339.389	0	5	0.000445056	0.000376149	7.7721e-05	0.00369372	0.000191708	0	0	Bacteria;Proteobacteria;Epsilonproteobacteria;Campylobacterales;Helicobacteraceae;Sulfurovum;uncultured bacterium
g_test	py_mrc	New.ReferenceOTU782	332.77	0	4	0.00196662	0.000245944	6.04497e-05	2.35269e-06	0	0	0	Bacteria;Proteobacteria;Epsilonproteobacteria;Campylobacterales;Helicobacteraceae;Sulfurovum
g_test	py_mrc	JN662191.1.1362	331.68	0	6	0.0022424	8.86121e-05	7.34032e-05	1.17634e-05	3.6867e-06	0	3.2203e-05	Bacteria;Proteobacteria;Epsilonproteobacteria;Campylobacterales;Helicobacteraceae;Sulfurovum;uncultured bacterium
g_test	py_mrc	New.ReferenceOTU2098	329.154	0	4	0.00330179	0.00012478	0.000408035	2.35269e-06	0	0	0	Bacteria;Proteobacteria;Epsilonproteobacteria;Nautiliales;Nautiliaceae;Caminibacter;uncultured bacterium
g_test	py_mrc	New.ReferenceOTU1161	329.005	0	4	6.65683e-05	0	0	0.000145867	0.0016074	0	0.000418639	Bacteria;Proteobacteria;Gammaproteobacteria;Order Incertae Sedis;Family Incertae Sedis;Marinicella;uncultured bacterium
g_test	py_mrc	New.ReferenceOTU2017	325.907	0	5	1.14117e-05	3.61682e-06	0	0.000150572	0.00128297	0	3.2203e-05	Bacteria;Proteobacteria;Gammaproteobacteria;Order Incertae Sedis;Family Incertae Sedis;Marinicella;uncultured bacterium
g_test	py_mrc	New.ReferenceOTU787	322.532	0	4	0.00130474	0.000620285	1.29535e-05	1.17634e-05	0	0	0	Bacteria;Proteobacteria;Epsilonproteobacteria;Campylobacterales;Campylobacteraceae;Arcobacter;uncultured epsilon proteobacterium
g_test	py_mrc	DQ395479.1.1517	307.36	0	4	0	0	0	1.88215e-05	0.000105071	0.002248	0.000676263	Bacteria;Proteobacteria;Alphaproteobacteria;Rickettsiales;Rickettsiaceae;Rickettsia
g_test	py_mrc	AB293244.1.1335	306.651	0	4	0	0.00205074	0.00558728	4.70537e-06	0	1.8366e-06	0	Archaea;Crenarchaeota;Thermoprotei;Thermoproteales;Thermoproteaceae;uncultured;uncultured archaeon
g_test	py_mrc	JN873940.1.1483	299.631	0	5	0.000739859	0.00015914	6.47675e-06	0.00382312	3.6867e-05	0	0	Bacteria;Proteobacteria;Epsilonproteobacteria;Campylobacterales;Helicobacteraceae;Sulfurimonas;uncultured bacterium
g_test	py_mrc	DQ071079.1.1438	299.488	0	6	0.000941466	0.00750128	0	0.00308908	0.000200925	3.67321e-06	0.000144914	Bacteria;Proteobacteria;Epsilonproteobacteria;Campylobacterales;Helicobacteraceae;Sulfurimonas;uncultured bacterium
g_test	py_mrc	JQ287017.1.1510	297.503	0	4	0	0	0	0.000559939	0.00682039	1.8366e-06	0.0369207	Bacteria;Verrucomicrobia;Verrucomicrobiae;Verrucomicrobiales;DEV007;uncultured bacterium;uncultured bacterium
g_test	py_mrc	New.ReferenceOTU929	296.448	0	5	0.00186772	1.44673e-05	0	7.05806e-06	2.58069e-05	0	1.61015e-05	Bacteria;Bacteroidetes;VC2,1 Bac22;uncultured bacterium;uncultured bacterium;uncultured bacterium;uncultured bacterium
g_test	py_mrc	New.ReferenceOTU2184	287.832	0	4	0.000100803	2.35093e-05	0	0.00198802	1.10601e-05	0	0	Bacteria;Bacteroidetes;Flavobacteriia;Flavobacteriales;Flavobacteriaceae
g_test	py_mrc	New.ReferenceOTU754	280.875	0	5	1.90195e-06	0	6.47675e-06	0.000936369	0.000409223	0	1.61015e-05	Bacteria;Proteobacteria;Gammaproteobacteria;Thiotrichales;Thiotrichaceae;uncultured;uncultured bacterium
g_test	py_mrc	New.CleanUp.ReferenceOTU23903	273.641	0	4	0	0	0	0.000421131	0.00080923	1.8366e-06	4.83045e-05	Bacteria;Proteobacteria;Alphaproteobacteria;Rhizobiales;Phyllobacteriaceae;Pseudahrensia;uncultured bacterium
g_test	py_mrc	JQ712413.1.1383	271.578	0	5	0.000753172	0.00270176	2.15892e-06	0.00059523	6.26739e-05	0	0	Bacteria;Proteobacteria;Epsilonproteobacteria;Campylobacterales;Helicobacteraceae;Sulfurimonas;uncultured epsilon proteobacterium
g_test	py_mrc	New.CleanUp.ReferenceOTU405768	271.206	0	4	3.8039e-06	0	2.15892e-06	0.00131986	7.37339e-05	0	0	Bacteria;Proteobacteria;Gammaproteobacteria;Methylococcales;Marine Methylotrophic Group 2
g_test	py_mrc	AJ431251.1.1522	265.81	0	4	0.00336265	8.13784e-05	0.00057859	2.35269e-06	0	0	0	Bacteria;Firmicutes;Clostridia;Thermoanaerobacterales;Thermodesulfobiaceae;Coprothermobacter
g_test	py_mrc	FJ905650.1.1392	265.789	0	4	0	0	0	0.000181157	0.00176224	1.8366e-06	0.00276946	Bacteria;Planctomycetes;Planctomycetacia;Planctomycetales;Planctomycetaceae;Planctomyces;uncultured bacterium
g_test	py_mrc	HQ807406.1.1453	255.664	0	4	0	0	1.29535e-05	0	5.53005e-06	0.00150051	1.61015e-05	Bacteria;Proteobacteria;Gammaproteobacteria;Enterobacteriales;Enterobacteriaceae;Escherichia-Shigella
g_test	py_mrc	FN562851.1.1351	249.704	0	5	0.000606722	0.00108866	6.47675e-06	6.35225e-05	0	1.8366e-06	0	Bacteria;Proteobacteria;Epsilonproteobacteria;Campylobacterales;Helicobacteraceae;Sulfurovum;uncultured bacterium
g_test	py_mrc	New.ReferenceOTU2402	247.611	0	5	1.90195e-05	3.61682e-06	0	0.000444658	0.00077052	5.50981e-06	0	Bacteria;Proteobacteria;Gammaproteobacteria;Thiotrichales;Piscirickettsiaceae;Thiomicrospira;uncultured gamma proteobacterium
g_test	py_mrc	FN562856.1.1370	236.269	0	7	0.0319376	0.0332567	0.0242706	0.0454704	0.00424708	1.8366e-05	8.05075e-05	Bacteria;Proteobacteria;Epsilonproteobacteria;Campylobacterales;Helicobacteraceae;Sulfurovum;uncultured epsilon proteobacterium
g_test	py_mrc	CP001899.1403988.1405498	236.154	0	4	1.90195e-06	0.000745065	0.00292317	0	3.6867e-06	0	0	Archaea;Euryarchaeota;Archaeoglobi;Archaeoglobales;Archaeoglobaceae;Archaeoglobus
g_test	py_mrc	AF367495.1.1329	235.774	0	6	0.00373733	0.0078051	3.67016e-05	0.00611228	0.00929232	3.67321e-06	0	Bacteria;Proteobacteria;Epsilonproteobacteria;Campylobacterales;Helicobacteraceae;Sulfurimonas;uncultured epsilon proteobacterium
g_test	py_mrc	AY251060.1.1475	233.304	0	5	0.00295373	0.0016764	0.00123058	2.82322e-05	3.6867e-06	0	0	Bacteria;Proteobacteria;Epsilonproteobacteria;Campylobacterales;Campylobacteraceae;Thiofractor;uncultured bacterium
g_test	py_mrc	New.CleanUp.ReferenceOTU634501	233.003	0	4	0	0	0	9.41075e-06	0.000949325	1.8366e-06	1.61015e-05	Bacteria;Bacteroidetes;Flavobacteriia;Flavobacteriales;Flavobacteriaceae;Lutibacter;uncultured Bacteroidetes bacterium
g_test	py_mrc	FN562904.1.1341	226.531	0	4	5.32546e-05	5.42523e-06	0	0.00103989	0.000313369	0	0	Bacteria;Bacteroidetes;Flavobacteriia;Flavobacteriales;Flavobacteriaceae;uncultured;uncultured bacterium
g_test	py_mrc	AB476196.1.1434	226.473	0	5	0.000232038	0.000294771	0.000615292	0.00189627	6.26739e-05	0	0	Bacteria;Proteobacteria;Epsilonproteobacteria;Campylobacterales;Helicobacteraceae;Sulfurovum;uncultured bacterium
g_test	py_mrc	New.ReferenceOTU389	225.246	0	5	8.55878e-05	5.60607e-05	2.15892e-06	0.00151748	0.000147468	0	0	Bacteria;Proteobacteria;Epsilonproteobacteria;Campylobacterales;Helicobacteraceae;Sulfurovum;uncultured bacterium
g_test	py_mrc	New.ReferenceOTU1982	219.676	0	4	0.00151395	5.42523e-06	0	1.64688e-05	3.13369e-05	0	0	Bacteria;Bacteroidetes;Sphingobacteriia;Sphingobacteriales;WCHB1-69
g_test	py_mrc	EU050874.1.1386	218.947	0	4	0	0	0	2.35269e-06	0.00102859	1.8366e-06	0.0378707	Bacteria;Planctomycetes;Phycisphaerae;Phycisphaerales;Phycisphaeraceae;Phycisphaera;uncultured bacterium
g_test	py_mrc	New.ReferenceOTU1298	214.593	0	6	0.0012667	1.08505e-05	6.47675e-06	2.35269e-06	5.53005e-06	2.02027e-05	0	Bacteria;Proteobacteria;Epsilonproteobacteria;Campylobacterales;Helicobacteraceae;Sulfurovum;uncultured epsilon proteobacterium
g_test	py_mrc	New.ReferenceOTU1434	214.1	0	7	4.18429e-05	3.61682e-06	2.15892e-06	0.000769328	0.000700472	8.44838e-05	0.000161015	Bacteria;Proteobacteria;Alphaproteobacteria;Rhodobacterales;Rhodobacteraceae;uncultured;uncultured bacterium
g_test	py_mrc	New.ReferenceOTU2528	208.529	0	4	5.70585e-05	0.00113568	2.15892e-06	1.17634e-05	0	0	0	Bacteria;Proteobacteria;Epsilonproteobacteria;Campylobacterales;Helicobacteraceae;Sulfurimonas;uncultured bacterium
g_test	py_mrc	EF219007.1.1376	208.098	0	4	7.22741e-05	0.00116823	0	2.11742e-05	1.84335e-06	0	0	Bacteria;Proteobacteria;Epsilonproteobacteria;Campylobacterales;Helicobacteraceae;Sulfurimonas;uncultured bacterium
g_test	py_mrc	New.ReferenceOTU1347	207.199	0	4	0.00266653	0.00125684	0.00102117	2.35269e-06	0	0	0	Bacteria;Caldiserica;Caldisericia;Caldisericales;Caldisericaceae;Caldisericum
g_test	py_mrc	JQ287110.1.1470	206.648	0	6	0.00240977	0.000924097	1.72713e-05	0.000771681	1.84335e-05	1.8366e-06	0	Bacteria;Proteobacteria;Epsilonproteobacteria;Campylobacterales;Helicobacteraceae;Sulfurovum;uncultured bacterium
g_test	py_mrc	New.CleanUp.ReferenceOTU815040	202.543	0	4	1.90195e-06	3.61682e-06	0.000986626	2.35269e-06	0	0	0	Bacteria;Proteobacteria;Epsilonproteobacteria;Nautiliales;Nautiliaceae;Nitratifractor;uncultured bacterium
g_test	py_mrc	New.CleanUp.ReferenceOTU192371	194.918	0	5	0.00106509	0.000104888	2.15892e-06	9.41075e-06	1.84335e-06	0	0	Bacteria;Proteobacteria;Epsilonproteobacteria;Campylobacterales;Helicobacteraceae;Sulfurovum;uncultured bacterium
g_test	py_mrc	AJ441200.1.1419	189.002	0	5	0.000365175	0.000840911	2.15892e-06	1.88215e-05	1.10601e-05	0	0	Bacteria;Proteobacteria;Epsilonproteobacteria;Campylobacterales;Helicobacteraceae;Sulfurimonas
g_test	py_mrc	New.CleanUp.ReferenceOTU886493	188.262	0	5	0.000329037	0.000920481	2.15892e-06	3.7643e-05	5.53005e-06	0	0	Bacteria;Proteobacteria;Epsilonproteobacteria;Campylobacterales;Helicobacteraceae;Sulfurimonas;uncultured bacterium
g_test	py_mrc	New.ReferenceOTU2322	185.262	0	4	0	0	0	2.35269e-06	0.000127191	1.8366e-06	0.0142659	Bacteria;Proteobacteria;Gammaproteobacteria;Chromatiales;Ectothiorhodospiraceae;Acidiferrobacter;uncultured bacterium
g_test	py_mrc	AJ535243.1.1522	185.054	0	4	6.46663e-05	0	1.29535e-05	0.00117399	3.6867e-05	0	0	Bacteria;Proteobacteria;Deltaproteobacteria;Desulfobacterales;Desulfobulbaceae;uncultured
g_test	py_mrc	JN874001.1.1481	184.404	0	5	0.0015577	3.61682e-06	0.00361187	6.11698e-05	6.26739e-05	0	0	Bacteria;Proteobacteria;Epsilonproteobacteria;Campylobacterales;Helicobacteraceae;Sulfurovum;uncultured epsilon proteobacterium
g_test	py_mrc	DQ223020.1.1315	182.585	0	4	0	1.80841e-06	0	0	5.53005e-06	1.8366e-06	0.00896854	Bacteria;Proteobacteria;Alphaproteobacteria;Rhodobacterales;Rhodobacteraceae;Tateyamaria
g_test	py_mrc	AB476198.1.1452	179.156	0	5	1.90195e-06	3.61682e-06	1.72713e-05	0.000167041	0.000604618	0	0	Bacteria;Proteobacteria;Gammaproteobacteria;Thiotrichales;Thiotrichaceae;uncultured
g_test	py_mrc	JQ287298.1.1469	175.485	0	4	0.000412723	0.000690813	0	9.41075e-06	1.47468e-05	0	0	Bacteria;Proteobacteria;Epsilonproteobacteria;Campylobacterales;Campylobacteraceae;Sulfurospirillum;uncultured bacterium
g_test	py_mrc	New.ReferenceOTU2287	173.934	0	6	2.47254e-05	0	2.15892e-06	0.000708159	0.000392633	1.8366e-05	0.000273726	Bacteria;Proteobacteria;Alphaproteobacteria;Rhodobacterales;Rhodobacteraceae;uncultured;uncultured bacterium
g_test	py_mrc	JN662112.1.1361	173.328	0	4	0.00100803	3.61682e-06	2.15892e-06	4.70537e-06	0	0	0	Bacteria;Proteobacteria;Epsilonproteobacteria;Campylobacterales;Helicobacteraceae;Sulfurovum;uncultured bacterium
g_test	py_mrc	FJ535305.1.1335	172.344	0	4	0.000895819	0.000119355	0	7.05806e-06	1.84335e-06	0	0	Bacteria;Proteobacteria;Epsilonproteobacteria;Campylobacterales;Helicobacteraceae;Sulfurimonas;uncultured epsilon proteobacterium
g_test	py_mrc	New.CleanUp.ReferenceOTU363246	171.642	0	4	7.6078e-05	0.000128397	0.00143136	7.05806e-06	0	0	0	Archaea;Nanoarchaeota;Nanoarchaeota Incertae Sedis;Unknown Order;Unknown Family;Nanoarchaeum;uncultured nanoarchaeote
g_test	py_mrc	New.ReferenceOTU1374	169.722	0	4	0	0	0	1.17634e-05	0.00149127	0.000110196	0.0021898	Bacteria;Bacteroidetes;Flavobacteriia;Flavobacteriales;Flavobacteriaceae;Maritimimonas
g_test	py_mrc	New.ReferenceOTU2265	169.216	0	4	7.6078e-06	0	0.000829024	9.41075e-06	3.6867e-06	0	0	Bacteria;Proteobacteria;Epsilonproteobacteria;Nautiliales;Nautiliaceae;Nitratifractor;uncultured bacterium
g_test	py_mrc	New.ReferenceOTU985	169.203	0	5	2.28234e-05	0	0.000882997	3.05849e-05	5.53005e-06	1.8366e-06	0	Bacteria;Proteobacteria;Epsilonproteobacteria;Campylobacterales;Helicobacteraceae;Sulfurovum;uncultured epsilon proteobacterium
g_test	py_mrc	New.ReferenceOTU1549	168.471	0	5	0.000823545	0.000452102	2.15892e-06	5.41118e-05	1.65901e-05	0	0	Bacteria;Proteobacteria;Epsilonproteobacteria;Campylobacterales;Helicobacteraceae;Sulfurimonas
g_test	py_mrc	JX525515.1.1426	168.428	0	4	1.90195e-06	0	2.15892e-06	0.000444658	0.000337333	0	0	Bacteria;Bacteroidetes;Flavobacteriia;Flavobacteriales;Flavobacteriaceae;uncultured
g_test	py_mrc	New.ReferenceOTU520	167.905	0	4	0.000694212	0.000287537	2.15892e-06	7.05806e-06	0	0	0	Bacteria;Proteobacteria;Epsilonproteobacteria;Campylobacterales;Campylobacteraceae;Thiofractor;uncultured bacterium
g_test	py_mrc	FJ348469.1.1394	167.029	0	4	0	0	0	4.70537e-06	0.00131246	1.8366e-06	0.00228641	Bacteria;Bacteroidetes;Flavobacteriia;Flavobacteriales;Flavobacteriaceae
g_test	py_mrc	New.ReferenceOTU639	163.805	0	5	0.000367076	0.000748682	2.15892e-06	4.23484e-05	1.84335e-06	0	0	Bacteria;Proteobacteria;Epsilonproteobacteria;Campylobacterales;Helicobacteraceae;Sulfurovum;uncultured epsilon proteobacterium
g_test	py_mrc	New.ReferenceOTU1139	163.543	0	4	0.000918642	0.000764957	0	0.000145867	6.45172e-05	0	0	Bacteria;Proteobacteria;Epsilonproteobacteria;Campylobacterales;Helicobacteraceae;Sulfurimonas;uncultured epsilon proteobacterium
g_test	py_mrc	EU107485.1.1485	161.92	0	4	0	0	0	7.99913e-05	0.00076499	1.8366e-06	0.000402538	Bacteria;Proteobacteria;Gammaproteobacteria;Thiotrichales;Thiotrichaceae;Thiothrix;uncultured bacterium
g_test	py_mrc	AY327886.1.1491	159.099	0	5	0.000642859	1.80841e-06	0.00214381	1.17634e-05	1.10601e-05	0	0	Bacteria;Proteobacteria;Deltaproteobacteria;Desulfobacterales;Desulfobulbaceae;Desulfobulbus;uncultured bacterium
g_test	py_mrc	HM185888.1.1371	158.551	0	4	0	1.80841e-06	1.72713e-05	0	0	0.000958708	1.61015e-05	Bacteria;Proteobacteria;Gammaproteobacteria;Enterobacteriales;Enterobacteriaceae
g_test	py_mrc	New.CleanUp.ReferenceOTU931727	158.228	0	6	1.90195e-06	0	1.07946e-05	0.00059523	0.000576968	9.18302e-06	0.00120761	Bacteria;Proteobacteria;Alphaproteobacteria;Rhodobacterales;Rhodobacteraceae;uncultured;uncultured bacterium
g_test	py_mrc	New.ReferenceOTU1731	156.893	0	6	4.94507e-05	1.80841e-06	2.15892e-06	0.0002188	0.000643329	1.8366e-06	0	Bacteria;Proteobacteria;Gammaproteobacteria;Thiotrichales;Piscirickettsiaceae;Thiomicrospira;uncultured gamma proteobacterium
g_test	py_mrc	AJ704703.1.1485	154.426	0	4	0	0	0	7.05806e-06	0.000683882	1.8366e-06	0.000112711	Bacteria;Bacteroidetes;Flavobacteriia;Flavobacteriales;Flavobacteriaceae
g_test	py_mrc	New.ReferenceOTU1488	153.19	0	4	0	0	0	9.41075e-06	0.000777893	1.8366e-06	0.000386436	Bacteria;Proteobacteria;Alphaproteobacteria;DB1-14;uncultured bacterium;uncultured bacterium;uncultured bacterium
g_test	py_mrc	New.CleanUp.ReferenceOTU92057	152.879	0	4	0	0	0	2.35269e-06	0.000707846	1.8366e-06	0.000177117	Bacteria;Bacteroidetes;Flavobacteriia;Flavobacteriales;Flavobacteriaceae
g_test	py_mrc	New.ReferenceOTU870	147.241	0	5	0	0	8.63567e-06	0.00012234	0.00076499	8.63204e-05	1.61015e-05	Bacteria;Proteobacteria;Gammaproteobacteria;Chromatiales;Ectothiorhodospiraceae;Acidiferrobacter;uncultured bacterium
g_test	py_mrc	New.CleanUp.ReferenceOTU90435	143.164	0	4	4.37449e-05	0	0	5.64645e-05	0.000693099	1.8366e-06	0	Bacteria;Bacteroidetes;VC2,1 Bac22;uncultured bacterium;uncultured bacterium;uncultured bacterium;uncultured bacterium
g_test	py_mrc	New.ReferenceOTU128	143.129	0	5	0	1.80841e-06	0	0.000230563	0.0024664	7.34642e-06	0.0113677	Bacteria;Proteobacteria;Gammaproteobacteria;Thiotrichales;Piscirickettsiaceae;uncultured;uncultured bacterium
g_test	py_mrc	New.CleanUp.ReferenceOTU676157	143.095	0	4	1.90195e-06	0	8.63567e-06	0.000689337	3.87103e-05	0	0	Bacteria;Bacteroidetes;Sphingobacteriia;Sphingobacteriales;Chitinophagaceae;uncultured;uncultured bacterium
g_test	py_mrc	FN562823.1.1291	141.734	0	4	0.000110313	1.80841e-05	0	0.00028938	0.000698629	0	0	Bacteria;Proteobacteria;Gammaproteobacteria;Thiotrichales;Thiotrichaceae;uncultured;uncultured bacterium
g_test	py_mrc	AY531570.1.1473	141.195	0	6	0.00119252	0.000439444	3.88605e-05	0.000207036	1.29034e-05	9.18302e-06	0	Bacteria;Proteobacteria;Epsilonproteobacteria;Campylobacterales;Helicobacteraceae;Sulfurovum;uncultured bacterium
g_test	py_mrc	FJ535264.1.1335	140.918	0	5	5.70585e-06	1.80841e-06	4.31784e-06	0.000705806	4.79271e-05	0	0	Bacteria;Proteobacteria;Epsilonproteobacteria;Campylobacterales;Helicobacteraceae;Sulfurovum;uncultured bacterium
g_test	py_mrc	AB095131.1.1049	139.605	0	4	0.000543958	0.00150279	0.000429625	4.70537e-06	0	0	0	Archaea;Euryarchaeota;Archaeoglobi;Archaeoglobales;Archaeoglobaceae;uncultured;uncultured archaeon
g_test	py_mrc	New.ReferenceOTU1185	137.194	0	4	3.8039e-06	0	0	0.000291733	0.00518534	0.0038734	0	Bacteria;Bacteroidetes;BD2-2;uncultured bacterium;uncultured bacterium;uncultured bacterium;uncultured bacterium
g_test	py_mrc	New.ReferenceOTU403	137.056	0	4	3.8039e-05	0.000806551	2.15892e-06	1.88215e-05	0	0	0	Bacteria;Proteobacteria;Epsilonproteobacteria;Campylobacterales;Helicobacteraceae;Sulfurimonas;uncultured bacterium
g_test	py_mrc	GQ848454.1.1457	136.188	0	4	0	0	2.15892e-06	0.000689337	1.65901e-05	0	1.61015e-05	Bacteria;Proteobacteria;Epsilonproteobacteria;Campylobacterales;Helicobacteraceae;Sulfurimonas;uncultured epsilon proteobacterium
g_test	py_mrc	AB476234.1.1464	136.188	0	4	1.90195e-06	0	1.29535e-05	0.000609346	7.00472e-05	0	0	Bacteria;Proteobacteria;Gammaproteobacteria;Methylococcales;Marine Methylotrophic Group 2;uncultured bacterium;uncultured bacterium
g_test	py_mrc	New.ReferenceOTU40	136.145	0	5	0.00149874	0.000491887	0.000284977	0.000115282	7.37339e-06	0	0	Bacteria;Proteobacteria;Epsilonproteobacteria;Campylobacterales;Helicobacteraceae;Sulfurovum;uncultured bacterium
g_test	py_mrc	AY672499.1.1488	135.768	0	6	0.000414625	0.000578691	1.29535e-05	3.05849e-05	9.21674e-06	1.8366e-06	0	Bacteria;Proteobacteria;Epsilonproteobacteria;Campylobacterales;Helicobacteraceae;Sulfurovum;uncultured bacterium
g_test	py_mrc	AF068783.1.1439	135.207	0	4	0.00105939	9.94625e-05	9.06746e-05	0	0	1.8366e-06	0	Bacteria;Proteobacteria;Epsilonproteobacteria;Campylobacterales;Helicobacteraceae;Sulfurovum
g_test	py_mrc	JQ712408.1.1373	134.776	0	7	0.00135799	0.000620285	0.000172713	5.64645e-05	0.000156685	1.28562e-05	1.61015e-05	Bacteria;Proteobacteria;Epsilonproteobacteria;Campylobacterales;Helicobacteraceae;Sulfurovum;uncultured epsilon proteobacterium
g_test	py_mrc	New.ReferenceOTU1353	134.775	0	4	0.000699918	0.00124599	0.000395082	0	5.53005e-06	0	0	Bacteria;Proteobacteria;Deltaproteobacteria;Desulfurellales;Desulfurellaceae;Hippea
g_test	py_mrc	New.ReferenceOTU1127	134.651	0	5	0.000793113	3.61682e-06	2.15892e-06	2.35269e-06	1.84335e-06	0	0	Bacteria;Proteobacteria;Epsilonproteobacteria;Campylobacterales;Helicobacteraceae;Sulfurimonas;uncultured bacterium
g_test	py_mrc	New.ReferenceOTU1055	131.643	0	4	0.000949073	0.000609434	0.000224527	1.88215e-05	0	0	0	Bacteria;Candidate division SR1;uncultured bacterium;uncultured bacterium;uncultured bacterium;uncultured bacterium;uncultured bacterium
g_test	py_mrc	New.ReferenceOTU440	130.748	0	4	1.90195e-05	3.25514e-05	0.000822548	0	1.84335e-06	0	0	Bacteria;Proteobacteria;Epsilonproteobacteria;Campylobacterales;Campylobacteraceae;Campylobacter;uncultured epsilon proteobacterium
g_test	py_mrc	AF420346.1.1474	129.131	0	4	0.000726545	0.000119355	1.94303e-05	2.35269e-06	0	0	0	Bacteria;Proteobacteria;Epsilonproteobacteria;Campylobacterales;Helicobacteraceae;Sulfurovum;uncultured bacterium
g_test	py_mrc	AY531558.1.1384	129.081	0	6	0.00236222	7.0528e-05	7.988e-05	0.000531707	4.05537e-05	1.8366e-06	0	Bacteria;Bacteroidetes;Flavobacteriia;Flavobacteriales;Flavobacteriaceae;Maritimimonas
g_test	py_mrc	DQ270620.1.1452	127.777	0	4	0	0	2.15892e-06	3.7643e-05	0.000503234	3.67321e-06	0	Bacteria;Proteobacteria;Gammaproteobacteria;Methylococcales;IheB2-23;uncultured bacterium;uncultured bacterium
g_test	py_mrc	FJ792191.1.1357	125.16	0	5	1.33137e-05	1.80841e-06	8.63567e-06	0.000487006	0.000180648	0	0	Bacteria;Bacteroidetes;Sphingobacteriia;Sphingobacteriales;Chitinophagaceae;uncultured;uncultured bacterium
g_test	py_mrc	KF545063.1.1478	124.064	0	5	3.8039e-06	3.61682e-06	1.29535e-05	0.000585819	6.63605e-05	0	0	Bacteria;Proteobacteria;Epsilonproteobacteria;Campylobacterales;Helicobacteraceae;Sulfurovum;uncultured Sulfurovum sp,
g_test	py_mrc	JQ287050.1.1446	120.804	0	4	0	0	0	1.88215e-05	0.000641485	4.59151e-05	3.2203e-05	Bacteria;Proteobacteria;Alphaproteobacteria;Rhizobiales;Phyllobacteriaceae;Pseudahrensia;uncultured bacterium
g_test	py_mrc	JN662076.1.1367	119.889	0	4	0.00203889	0.000708897	0	0.000654047	0.000193552	0	0	Bacteria;Proteobacteria;Epsilonproteobacteria;Campylobacterales;Helicobacteraceae;Sulfurimonas
g_test	py_mrc	New.ReferenceOTU1309	119.672	0	4	1.90195e-06	3.61682e-06	0	0.000383488	0.000210142	0	0	Bacteria;Bacteroidetes;Flavobacteriia;Flavobacteriales;Flavobacteriaceae;uncultured;uncultured bacterium
g_test	py_mrc	GQ261309.1.1421	119.467	0	5	3.8039e-06	5.42523e-06	1.72713e-05	0.000155277	0.000388947	0	0	Bacteria;Proteobacteria;Epsilonproteobacteria;Campylobacterales;Helicobacteraceae;Sulfurovum;uncultured epsilon proteobacterium
g_test	py_mrc	New.ReferenceOTU330	116.779	0	4	3.04312e-05	3.61682e-06	0	0.000712864	3.50236e-05	0	0	Bacteria;Proteobacteria;Epsilonproteobacteria;Campylobacterales;Helicobacteraceae;Sulfurimonas;uncultured bacterium
g_test	py_mrc	JX403051.1.1513	116.229	0	4	0.000359469	0.000343598	0	4.70537e-06	5.53005e-06	0	0	Bacteria;Proteobacteria;Epsilonproteobacteria;Campylobacterales;Helicobacteraceae;Sulfurovum;uncultured bacterium
g_test	py_mrc	New.ReferenceOTU1002	115.401	0	4	3.8039e-06	0	1.07946e-05	0.000543471	4.97704e-05	0	0	Bacteria;Bacteroidetes;Flavobacteriia;Flavobacteriales;Flavobacteriaceae
g_test	py_mrc	New.ReferenceOTU1277	111.843	0	4	0.000150254	2.89346e-05	0	0.000432894	0.000540101	0	0	Unassigned
g_test	py_mrc	FJ535253.1.1337	111.069	0	4	7.6078e-06	5.42523e-06	0	0.000635225	7.37339e-06	0	0	Bacteria;Proteobacteria;Epsilonproteobacteria;Campylobacterales;Helicobacteraceae;Sulfurimonas;uncultured epsilon proteobacterium
g_test	py_mrc	AB611366.1.906	110.949	0	4	4.94507e-05	0.000130206	0.00103196	4.70537e-06	0	0	0	Archaea;Nanoarchaeota;Nanoarchaeota Incertae Sedis;Unknown Order;Unknown Family;Nanoarchaeum;uncultured nanoarchaeote
g_test	py_mrc	JX526682.1.1430	109.177	0	4	0	0	0	3.05849e-05	0.000444247	1.8366e-06	3.2203e-05	Bacteria;Bacteroidetes;Flavobacteriia;Flavobacteriales;Cryomorphaceae;Crocinitomix;uncultured bacterium
g_test	py_mrc	New.CleanUp.ReferenceOTU223912	108.543	0	5	3.04312e-05	3.61682e-06	4.31784e-06	0.000343492	0.000285719	0	0	Bacteria;Bacteroidetes;Flavobacteriia;Flavobacteriales;Cryomorphaceae;Fluviicola
g_test	py_mrc	EU775002.1.1308	107.458	0	4	0	0	8.63567e-06	0	1.84335e-06	0.000646485	1.61015e-05	Bacteria;Proteobacteria;Gammaproteobacteria;Enterobacteriales;Enterobacteriaceae;Escherichia-Shigella
g_test	py_mrc	JQ611155.1.1358	102.598	0	4	0.000287195	0.000327322	0	2.35269e-06	5.53005e-06	0	0	Bacteria;Proteobacteria;Epsilonproteobacteria;Campylobacterales;Campylobacteraceae;Sulfurospirillum;uncultured bacterium
g_test	py_mrc	JQ287089.1.1471	95.2981	0	5	0.000102705	3.61682e-06	0	0.000806971	4.05537e-05	0	4.83045e-05	Bacteria;Proteobacteria;Epsilonproteobacteria;Campylobacterales;Helicobacteraceae;Sulfurovum;uncultured bacterium
g_test	py_mrc	FJ717155.1.1348	95.1392	0	5	0.000842564	0.00011393	4.53373e-05	6.11698e-05	5.53005e-06	0	0	Bacteria;Proteobacteria;Epsilonproteobacteria;Campylobacterales;Helicobacteraceae;Sulfurovum;uncultured epsilon proteobacterium
g_test	py_mrc	AB193955.1.1475	93.4041	0	4	0	0	1.51124e-05	0.000348198	0.000101384	1.8366e-06	0	Bacteria;Proteobacteria;Epsilonproteobacteria;Campylobacterales;Helicobacteraceae;Sulfurovum;uncultured bacterium
g_test	py_mrc	New.ReferenceOTU1118	92.0424	0	4	0	0	0	7.05806e-06	0.000595402	1.8366e-06	0.000692365	Bacteria;Planctomycetes;Planctomycetacia;Planctomycetales;Planctomycetaceae;Pirellula
g_test	py_mrc	AY531590.1.1473	91.8672	0	4	1.90195e-06	0	0.000449055	0	1.47468e-05	3.67321e-06	0	Bacteria;Proteobacteria;Epsilonproteobacteria;Campylobacterales;Campylobacteraceae;Campylobacter;uncultured bacterium
g_test	py_mrc	AJ441204.1.1419	87.9555	0	4	1.71176e-05	0	2.15892e-06	0.000515238	1.65901e-05	0	0	Bacteria;Proteobacteria;Epsilonproteobacteria;Campylobacterales;Helicobacteraceae;Sulfurovum;uncultured bacterium
g_test	py_mrc	JQ287290.1.1486	82.4976	0	6	3.8039e-06	1.80841e-06	0	0.000291733	0.00532359	3.67321e-06	0.0409783	Bacteria;Bacteroidetes;Flavobacteriia;Flavobacteriales;Flavobacteriaceae
g_test	py_mrc	New.CleanUp.ReferenceOTU301769	81.0114	0	4	0	0	0	7.05806e-06	0.000475584	1.8366e-06	0.000418639	Unassigned
g_test	py_mrc	New.CleanUp.ReferenceOTU572128	80.603	0	4	0.00202938	0	0.000343268	0.000108224	0.000165901	0	0	Bacteria;Proteobacteria;Deltaproteobacteria;Desulfobacterales;Desulfobulbaceae;Desulfobulbus;uncultured bacterium
g_test	py_mrc	HE576793.1.1403	80.0632	0	5	0.000517331	1.62757e-05	0	0.000181157	0.00107099	1.8366e-06	0	Bacteria;Bacteroidetes;Flavobacteriia;Flavobacteriales;Flavobacteriaceae;uncultured;uncultured Bacteroidetes bacterium
g_test	py_mrc	New.CleanUp.ReferenceOTU407076	79.5434	0	4	0.000201607	0.000260411	2.15892e-06	2.35269e-06	0	0	0	Bacteria;Proteobacteria;Epsilonproteobacteria;Campylobacterales;Campylobacteraceae;Thiofractor;uncultured bacterium
g_test	py_mrc	New.ReferenceOTU953	79.2647	0	4	0	1.80841e-06	0	6.82279e-05	0.000285719	0	1.61015e-05	Bacteria;Proteobacteria;Gammaproteobacteria;Order Incertae Sedis;Family Incertae Sedis;Marinicella;uncultured bacterium
g_test	py_mrc	AY548973.1.1343	78.2333	0	5	0.000182587	8.49953e-05	3.23838e-05	0.00103753	5.53005e-06	0	0	Bacteria;Proteobacteria;Epsilonproteobacteria;Campylobacterales;Campylobacteraceae;Sulfurospirillum;uncultured bacterium
g_test	py_mrc	KF746349.99245.100735	77.5947	0	4	1.90195e-06	0	8.63567e-06	0	1.84335e-06	0.000483027	0	Bacteria;Cyanobacteria;Chloroplast;uncultured bacterium;uncultured bacterium;uncultured bacterium;uncultured bacterium
g_test	py_mrc	New.ReferenceOTU46	75.3318	0	6	0.000114117	9.04205e-06	2.15892e-06	0.000228211	0.000422127	3.67321e-06	0	Bacteria;Proteobacteria;Gammaproteobacteria;Thiotrichales;Piscirickettsiaceae;Thiomicrospira;uncultured gamma proteobacterium
g_test	py_mrc	New.ReferenceOTU750	74.6008	0	4	0	1.80841e-06	0	0.000265854	0.000276502	0	0.000547451	Bacteria;Proteobacteria;Alphaproteobacteria;Rhodobacterales;Rhodobacteraceae;uncultured;uncultured bacterium
g_test	py_mrc	New.ReferenceOTU881	74.4301	0	5	0.000334743	9.22289e-05	2.15892e-06	0	1.84335e-06	1.46928e-05	0	Bacteria;Proteobacteria;Epsilonproteobacteria;Nautiliales;Nautiliaceae;uncultured;uncultured epsilon proteobacterium
g_test	py_mrc	AF332514.1.1497	73.1236	0	4	9.50975e-06	0.00878164	0.00535196	2.35269e-05	0	0	0	Bacteria;Thermodesulfobacteria;Thermodesulfobacteria;Thermodesulfobacteriales;Thermodesulfobacteriaceae;Caldimicrobium
g_test	py_mrc	New.CleanUp.ReferenceOTU815228	73.0139	0	4	7.6078e-06	1.80841e-06	0	0.00041172	1.29034e-05	0	0	Bacteria;Bacteroidetes;Flavobacteriia;Flavobacteriales;Flavobacteriaceae;Lutibacter;uncultured bacterium
g_test	py_mrc	New.CleanUp.ReferenceOTU436199	72.9365	0	4	0.000454566	0	0	2.35269e-06	5.53005e-06	0	8.05075e-05	Bacteria;Proteobacteria;Gammaproteobacteria;Alteromonadales;Colwelliaceae;Colwellia
g_test	py_mrc	New.ReferenceOTU503	70.043	2.09709e-16	4	0.000403214	6.14859e-05	1.29535e-05	0	0	1.8366e-06	0	Bacteria;Proteobacteria;Epsilonproteobacteria;Campylobacterales;Helicobacteraceae;Sulfurovum;uncultured bacterium
g_test	py_mrc	JN874221.1.1469	69.657	2.09709e-16	5	0.000669487	0.000837294	0.000727555	0.00195508	0.000105071	0	0	Bacteria;Proteobacteria;Epsilonproteobacteria;Campylobacterales;Helicobacteraceae;Sulfurovum;uncultured bacterium
g_test	py_mrc	AB176113.1.1296	69.526	2.09709e-16	5	3.8039e-05	1.80841e-06	2.15892e-06	0.000190568	0.000252539	0	0	Bacteria;Proteobacteria;Epsilonproteobacteria;Campylobacterales;Helicobacteraceae;Sulfurimonas;uncultured bacterium
g_test	py_mrc	New.ReferenceOTU1871	69.4137	2.09709e-16	4	0.00047739	0.000321897	0	9.88128e-05	2.39635e-05	0	0	Bacteria;Proteobacteria;Epsilonproteobacteria;Campylobacterales;Helicobacteraceae;Sulfurimonas
g_test	py_mrc	FJ535273.1.1334	69.0869	2.09709e-16	5	1.14117e-05	3.25514e-05	0.000142489	0.00035055	1.84335e-05	0	0	Bacteria;Proteobacteria;Epsilonproteobacteria;Campylobacterales;Helicobacteraceae;Sulfurovum;uncultured bacterium
g_test	py_mrc	HQ153866.1.1384	68.8546	2.09709e-16	5	0.000247254	0.000224243	8.63567e-06	7.05806e-06	1.84335e-06	0	0	Bacteria;Proteobacteria;Epsilonproteobacteria;Campylobacterales;Helicobacteraceae;Sulfurovum;uncultured bacterium
g_test	py_mrc	New.CleanUp.ReferenceOTU331555	67.8644	4.18195e-16	4	0	1.80841e-06	0	3.52903e-05	0.000265442	0	1.61015e-05	Bacteria;Proteobacteria;Gammaproteobacteria;Order Incertae Sedis;Family Incertae Sedis;Marinicella;uncultured bacterium
g_test	py_mrc	New.ReferenceOTU2295	63.8268	2.50187e-15	6	0.000905329	0.000132014	6.26086e-05	0.00168923	0.000304153	5.50981e-06	0	Bacteria;Proteobacteria;Gammaproteobacteria;Thiotrichales;Piscirickettsiaceae;Thiomicrospira;uncultured gamma proteobacterium
g_test	py_mrc	New.CleanUp.ReferenceOTU813257	63.1047	3.74193e-15	4	1.90195e-06	0	6.47675e-06	0.000308202	1.84335e-05	0	0	Bacteria;Proteobacteria;Gammaproteobacteria;Thiotrichales;Piscirickettsiaceae;Thiomicrospira;uncultured gamma proteobacterium
g_test	py_mrc	AB476212.1.1464	62.3723	5.38939e-15	4	0	0	0	8.46967e-05	0.00362218	9.18302e-06	0.0635043	Bacteria;Planctomycetes;Planctomycetacia;Planctomycetales;Planctomycetaceae;Bythopirellula;uncultured bacterium
g_test	py_mrc	New.ReferenceOTU1385	61.9696	6.4073e-15	4	0.000410821	1.80841e-06	0	2.35269e-06	7.37339e-06	0	0	Bacteria;Proteobacteria;Gammaproteobacteria;Thiotrichales;Piscirickettsiaceae;Thiomicrospira;uncultured gamma proteobacterium
g_test	py_mrc	New.ReferenceOTU2268	61.268	9.27419e-15	5	0.00532927	0.000815593	2.15892e-06	0.00273147	0.00077605	0	0	Bacteria;Proteobacteria;Gammaproteobacteria;Thiotrichales;Piscirickettsiaceae;Thiomicrospira;uncultured bacterium
g_test	py_mrc	New.CleanUp.ReferenceOTU229444	60.2983	1.50017e-14	4	0	0	0	8.70494e-05	0.000226732	1.8366e-06	9.6609e-05	Bacteria;Proteobacteria;Deltaproteobacteria;Bdellovibrionales;Bdellovibrionaceae;OM27 clade;uncultured bacterium
g_test	py_mrc	New.ReferenceOTU2573	59.7209	2.00817e-14	4	2.66273e-05	0.000815593	0.00172066	0	0	1.8366e-06	0	Bacteria;Proteobacteria;Epsilonproteobacteria;Nautiliales;Nautiliaceae;Caminibacter;uncultured bacterium
g_test	py_mrc	New.ReferenceOTU1513	58.4736	3.80057e-14	4	0	7.23364e-06	2.15892e-06	0.000282322	4.60837e-05	0	0	Bacteria;Proteobacteria;Gammaproteobacteria;Thiotrichales;Piscirickettsiaceae;Thiomicrospira;uncultured gamma proteobacterium
g_test	py_mrc	New.ReferenceOTU1609	56.9062	8.39455e-14	4	0.000349959	1.08505e-05	0	2.35269e-06	3.6867e-06	0	0	Bacteria;Proteobacteria;Deltaproteobacteria;Bdellovibrionales;Bdellovibrionaceae;Bdellovibrio;uncultured bacterium
g_test	py_mrc	JQ712374.1.1378	56.6839	9.36632e-14	4	0.000378488	3.61682e-06	2.15892e-06	9.41075e-06	0	0	0	Bacteria;Proteobacteria;Epsilonproteobacteria;Campylobacterales;Campylobacteraceae;Arcobacter;uncultured epsilon proteobacterium
g_test	py_mrc	New.ReferenceOTU1794	56.2349	1.17305e-13	4	7.22741e-05	0.000267645	6.47675e-06	0	0	3.67321e-06	0	Bacteria;Proteobacteria;Epsilonproteobacteria;Nautiliales;Nautiliaceae;Caminibacter;uncultured bacterium
g_test	py_mrc	New.ReferenceOTU1165	55.8852	1.39804e-13	5	0.000775996	0.000132014	4.31784e-05	0.00175746	5.34571e-05	0	0	Bacteria;Proteobacteria;Epsilonproteobacteria;Campylobacterales;Helicobacteraceae;Sulfurovum;uncultured bacterium
g_test	py_mrc	New.ReferenceOTU1769	54.7026	2.54446e-13	6	0.00183538	0.000287537	8.63567e-06	0.00122104	0.00175487	4.04053e-05	0	Bacteria;Proteobacteria;Gammaproteobacteria;Thiotrichales;Piscirickettsiaceae;Thiomicrospira;uncultured gamma proteobacterium
g_test	py_mrc	New.ReferenceOTU2233	53.7556	4.10835e-13	4	0.000315724	0.000553373	0	0.00167041	0.000121661	0	0	Bacteria;Proteobacteria;Epsilonproteobacteria;Campylobacterales;Helicobacteraceae;Sulfurimonas;uncultured bacterium
g_test	py_mrc	New.CleanUp.ReferenceOTU934045	53.7055	4.20306e-13	4	0.000329037	1.80841e-06	2.15892e-06	2.35269e-06	0	0	0	Bacteria;Proteobacteria;Epsilonproteobacteria;Campylobacterales;Helicobacteraceae;Sulfurimonas;uncultured bacterium
g_test	py_mrc	FM179903.1.1493	51.1967	1.50353e-12	4	0	0	2.15892e-06	0.000228211	3.6867e-05	1.8366e-06	0	Bacteria;Proteobacteria;Gammaproteobacteria;Methylococcales;Marine Methylotrophic Group 2;uncultured bacterium;uncultured bacterium
g_test	py_mrc	EU050905.1.1397	51.1149	1.56331e-12	4	3.8039e-06	1.80841e-06	0	0.000134103	0.000127191	0	0	Bacteria;Bacteroidetes;Flavobacteriia;Flavobacteriales;Cryomorphaceae;Crocinitomix;uncultured bacterium
g_test	py_mrc	EU652527.1.1506	50.7312	1.89552e-12	4	0	3.61682e-06	0	0	1.84335e-06	1.8366e-06	0.00249573	Bacteria;Proteobacteria;Gammaproteobacteria;Xanthomonadales;JTB255 marine benthic group;uncultured bacterium;uncultured bacterium
g_test	py_mrc	New.CleanUp.ReferenceOTU429020	49.6141	3.33995e-12	4	7.6078e-06	0	0	4.70537e-05	0.000228575	1.10196e-05	0	Bacteria;Proteobacteria;Deltaproteobacteria;Desulfobacterales;Desulfobulbaceae;Desulfobulbus;uncultured bacterium
g_test	py_mrc	JQ712429.1.1383	49.2312	4.04875e-12	4	1.90195e-06	1.80841e-06	0	2.35269e-06	0.000215672	0	0	Bacteria;Bacteroidetes;Flavobacteriia;Flavobacteriales;NS9 marine group
g_test	py_mrc	New.CleanUp.ReferenceOTU859632	48.7781	5.08683e-12	4	1.90195e-06	0	0	0.000244679	2.39635e-05	1.8366e-06	0	Bacteria;Proteobacteria;Epsilonproteobacteria;Campylobacterales;Helicobacteraceae;Sulfurovum;uncultured bacterium
g_test	py_mrc	GQ452887.1.1498	48.104	7.15377e-12	5	0	1.80841e-06	0	0.000336434	0.00393924	0.00354832	0.00193218	Bacteria;Verrucomicrobia;Verrucomicrobiae;Verrucomicrobiales;DEV007;uncultured bacterium;uncultured bacterium
g_test	py_mrc	KC001528.1.1315	47.8721	8.02994e-12	4	1.90195e-06	1.80841e-06	0	1.41161e-05	0.000200925	0	0	Bacteria;Proteobacteria;Alphaproteobacteria;Rhodobacterales;Rhodobacteraceae
g_test	py_mrc	New.CleanUp.ReferenceOTU829988	47.6081	9.16223e-12	4	1.33137e-05	0	6.47675e-06	0.000287028	1.10601e-05	0	0	Bacteria;Proteobacteria;Epsilonproteobacteria;Campylobacterales;Helicobacteraceae;Sulfurovum;uncultured bacterium
g_test	py_mrc	New.CleanUp.ReferenceOTU825255	47.4653	9.82784e-12	4	0.000285293	0.000222434	0	6.11698e-05	9.21674e-06	0	0	Unassigned
g_test	py_mrc	New.ReferenceOTU993	46.7974	1.37808e-11	4	8.93917e-05	0.000155523	0	0	0	5.50981e-06	1.61015e-05	Bacteria;Proteobacteria;Epsilonproteobacteria;Nautiliales;Nautiliaceae;Caminibacter;uncultured bacterium
g_test	py_mrc	FN553958.1.1484	46.6942	1.44867e-11	5	0.00038039	0.000132014	1.29535e-05	0.00103283	0.000134564	0	0	Bacteria;Proteobacteria;Epsilonproteobacteria;Campylobacterales;Helicobacteraceae;Sulfurimonas
g_test	py_mrc	JN662118.1.1367	45.607	2.51648e-11	5	0.000123627	9.22289e-05	0.000200779	0.000465832	4.42404e-05	0	0	Bacteria;Proteobacteria;Epsilonproteobacteria;Campylobacterales;Helicobacteraceae;Sulfurovum;uncultured epsilon proteobacterium
g_test	py_mrc	KF545024.1.1481	44.6527	4.08565e-11	6	5.70585e-06	5.42523e-06	8.63567e-06	0.000242327	3.6867e-05	3.67321e-06	0	Bacteria;Proteobacteria;Epsilonproteobacteria;Campylobacterales;Helicobacteraceae;Sulfurovum;uncultured bacterium
g_test	py_mrc	New.CleanUp.ReferenceOTU650884	43.6778	6.70499e-11	4	0	0	1.51124e-05	0.00035055	6.63605e-05	0	0.00064406	Bacteria;Bacteroidetes;Flavobacteriia;Flavobacteriales;Flavobacteriaceae
g_test	py_mrc	EU555124.1.1480	43.4861	7.3752e-11	5	1.90195e-06	3.61682e-06	2.37481e-05	1.64688e-05	0.000167745	0	0	Bacteria;Proteobacteria;Gammaproteobacteria;Thiotrichales;Thiotrichaceae;uncultured;uncultured bacterium
g_test	py_mrc	New.ReferenceOTU1897	42.0148	1.56047e-10	4	0.000228234	5.60607e-05	0	4.70537e-06	3.6867e-06	0	0	Bacteria;Proteobacteria;Epsilonproteobacteria;Campylobacterales;Campylobacteraceae;Sulfurospirillum;uncultured bacterium
g_test	py_mrc	AF449231.1.1429	41.6935	1.83429e-10	5	0.000346155	1.98925e-05	4.31784e-06	2.82322e-05	0	1.8366e-06	0	Bacteria;Proteobacteria;Epsilonproteobacteria;Campylobacterales;Helicobacteraceae;Sulfurovum;uncultured bacterium
g_test	py_mrc	New.ReferenceOTU106	40.3741	3.59334e-10	4	0.000163568	0.000108505	4.31784e-06	4.70537e-06	0	0	0	Bacteria;Proteobacteria;Epsilonproteobacteria;Campylobacterales;Helicobacteraceae;Sulfurovum;uncultured bacterium
g_test	py_mrc	EF218989.1.1378	39.2835	6.26375e-10	4	3.8039e-06	0	6.47675e-06	0.000162335	4.42404e-05	0	0	Bacteria;Proteobacteria;Epsilonproteobacteria;Campylobacterales;Helicobacteraceae;Sulfurovum;uncultured bacterium
g_test	py_mrc	New.CleanUp.ReferenceOTU342190	38.9552	7.39137e-10	4	1.33137e-05	0	4.31784e-06	0.000171746	6.63605e-05	0	0	Bacteria;Proteobacteria;Epsilonproteobacteria;Campylobacterales;Helicobacteraceae;Sulfurovum;uncultured epsilon proteobacterium
g_test	py_mrc	HM481300.1.1434	38.9059	7.56052e-10	5	1.52156e-05	0.000303813	0	4.70537e-06	1.84335e-05	0	1.61015e-05	Bacteria;Proteobacteria;Epsilonproteobacteria;Campylobacterales;Helicobacteraceae;Sulfurimonas;uncultured bacterium
g_test	py_mrc	HM799090.1.1392	38.4808	9.37564e-10	4	0	0	0	0.000237621	2.21202e-05	1.8366e-06	0.00719737	Bacteria;Proteobacteria;Alphaproteobacteria;Rhodobacterales;Rhodobacteraceae;Roseobacter clade NAC11-7 lineage;uncultured alpha proteobacterium
g_test	py_mrc	New.ReferenceOTU2188	37.8896	1.26604e-09	4	0.000251057	1.80841e-06	0	4.70537e-06	1.84335e-06	0	0	Bacteria;Proteobacteria;Deltaproteobacteria;Desulfobacterales;Desulfobulbaceae;Desulfobulbus;uncultured delta proteobacterium
g_test	py_mrc	New.CleanUp.ReferenceOTU52031	37.6068	1.45973e-09	4	0.000270077	0.000213392	0	3.52903e-05	0.000827664	0	0	Bacteria;BD1-5;uncultured bacterium;uncultured bacterium;uncultured bacterium;uncultured bacterium;uncultured bacterium
g_test	py_mrc	AB095133.1.1040	36.567	2.4815e-09	4	0	0.00124961	0.00196246	9.41075e-06	0	1.8366e-06	0	Archaea;Euryarchaeota;Halobacteria;Halobacteriales;Miscellaneous Euryarchaeotic Group(MEG);uncultured archaeon;uncultured archaeon
g_test	py_mrc	FN562906.1.1359	35.4112	4.47924e-09	4	7.6078e-06	0	0	1.41161e-05	0.000173275	0	3.2203e-05	Bacteria;Bacteroidetes;Flavobacteriia;Flavobacteriales;Flavobacteriaceae;uncultured Bacteroidetes bacterium;uncultured Bacteroidetes bacterium
g_test	py_mrc	DQ071289.1.1344	35.1141	5.20387e-09	6	0.000116019	0.000406892	2.15892e-06	9.88128e-05	1.84335e-05	3.67321e-06	0	Bacteria;Proteobacteria;Epsilonproteobacteria;Campylobacterales;Campylobacteraceae;Arcobacter;uncultured epsilon proteobacterium
g_test	py_mrc	New.CleanUp.ReferenceOTU366342	34.1309	8.60092e-09	4	0	0	0	6.58752e-05	0.000178805	1.8366e-06	0.000273726	Bacteria;Proteobacteria;Alphaproteobacteria;DB1-14;uncultured bacterium;uncultured bacterium;uncultured bacterium
g_test	py_mrc	New.CleanUp.ReferenceOTU1069314	33.1118	1.44868e-08	4	0.000192097	0.000115738	0	3.05849e-05	1.84335e-06	0	0	Bacteria;Proteobacteria;Gammaproteobacteria;Thiotrichales;Piscirickettsiaceae;Thiomicrospira;uncultured bacterium
g_test	py_mrc	New.ReferenceOTU1637	32.2909	2.20426e-08	4	0.000648565	5.96775e-05	0	0.000959896	0.000287562	0	0	Unassigned
g_test	py_mrc	New.CleanUp.ReferenceOTU203232	32.2165	2.2844e-08	4	0.000439351	3.61682e-06	0	3.05849e-05	4.42404e-05	0	0	Bacteria;Bacteroidetes;Bacteroidia;Bacteroidales;Marinilabiaceae;uncultured
g_test	py_mrc	New.ReferenceOTU2355	30.7198	4.92534e-08	4	0	0	0	1.41161e-05	0.00204796	0.00395237	8.05075e-05	Bacteria;Bacteroidetes;Sphingobacteriia;Sphingobacteriales;Saprospiraceae;Lewinella;uncultured bacterium
g_test	py_mrc	JN874212.1.1472	30.0288	7.01495e-08	6	0.0010708	7.59532e-05	0.0002785	0.000152925	3.31803e-05	1.8366e-06	0	Bacteria;Proteobacteria;Epsilonproteobacteria;Campylobacterales;Helicobacteraceae;Sulfurovum;uncultured epsilon proteobacterium
g_test	py_mrc	FR853018.1.1522	29.7557	8.05567e-08	4	1.90195e-06	0	7.55621e-05	2.35269e-06	6.45172e-05	0	0	Bacteria;Proteobacteria;Deltaproteobacteria;Desulfobacterales;Desulfobacteraceae;SEEP-SRB1
g_test	py_mrc	FR853007.1.1516	29.3524	9.89345e-08	5	0.000475488	5.42523e-06	5.1814e-05	3.05849e-05	2.21202e-05	0	0	Bacteria;Proteobacteria;Deltaproteobacteria;Desulfobacterales;Desulfobulbaceae;Desulfobulbus;uncultured delta proteobacterium
g_test	py_mrc	KC682627.1.1220	29.1766	1.08058e-07	6	3.04312e-05	9.40373e-05	0	4.70537e-06	9.21674e-06	1.8366e-06	0.000901684	Bacteria;Proteobacteria;Epsilonproteobacteria;Campylobacterales;Helicobacteraceae;Sulfurimonas;uncultured bacterium
g_test	py_mrc	New.CleanUp.ReferenceOTU1067318	29.1451	1.09552e-07	4	0.000226332	1.80841e-05	0	9.41075e-06	7.37339e-06	0	0	Unassigned
g_test	py_mrc	New.ReferenceOTU781	28.5818	1.4616e-07	4	0	0	0	4.23484e-05	0.00146546	1.8366e-06	0.0103211	Bacteria;Planctomycetes;Planctomycetacia;Planctomycetales;Planctomycetaceae;Bythopirellula;uncultured bacterium
g_test	py_mrc	New.ReferenceOTU2533	27.9294	2.0423e-07	4	0.000220626	0.000320089	0	0.000134103	2.02768e-05	0	0	Bacteria;Proteobacteria;Epsilonproteobacteria;Campylobacterales;Helicobacteraceae;Sulfurovum;uncultured bacterium
g_test	py_mrc	AF449243.1.1429	27.8264	2.14857e-07	5	9.50975e-06	9.04205e-06	3.67016e-05	6.82279e-05	8.4794e-05	0	0	Bacteria;Proteobacteria;Epsilonproteobacteria;Campylobacterales;Helicobacteraceae;Sulfurovum;uncultured epsilon proteobacterium
g_test	py_mrc	New.ReferenceOTU1310	27.2827	2.83873e-07	6	0.00197422	0.000399659	4.31784e-06	0.000757565	0.00194842	3.67321e-06	0	Bacteria;Proteobacteria;Gammaproteobacteria;Thiotrichales;Piscirickettsiaceae;Thiomicrospira;uncultured gamma proteobacterium
g_test	py_mrc	New.ReferenceOTU2219	26.7648	3.70174e-07	5	1.52156e-05	1.80841e-06	0	9.41075e-06	0.000184335	1.46928e-05	0	Bacteria;Proteobacteria;Gammaproteobacteria;Thiotrichales;Piscirickettsiaceae;Thiomicrospira;uncultured gamma proteobacterium
g_test	py_mrc	New.ReferenceOTU1933	26.6147	3.99095e-07	4	0	0.00199829	0.00107082	7.05806e-06	9.21674e-06	0	0	Bacteria;Aquificae;Aquificae;Aquificales;Desulfurobacteriaceae;Desulfurobacterium
g_test	py_mrc	New.ReferenceOTU1978	26.6028	4.00559e-07	5	3.8039e-06	1.80841e-06	6.47675e-06	6.35225e-05	7.55773e-05	0	0	Bacteria;Proteobacteria;Epsilonproteobacteria;Campylobacterales;Helicobacteraceae;Sulfurovum;uncultured bacterium
g_test	py_mrc	New.CleanUp.ReferenceOTU617032	26.4933	4.22858e-07	4	0.000228234	3.9785e-05	0	3.05849e-05	1.84335e-06	0	0	Bacteria;Proteobacteria;Gammaproteobacteria;Thiotrichales;Piscirickettsiaceae;Thiomicrospira;uncultured gamma proteobacterium
g_test	py_mrc	FN562878.1.1304	25.9487	5.59243e-07	6	0.000625742	0.000222434	0.000427466	0.000414073	0.00044056	0	6.4406e-05	Bacteria;BD1-5;uncultured bacterium;uncultured bacterium;uncultured bacterium;uncultured bacterium;uncultured bacterium
g_test	py_mrc	FJ628247.1.1501	25.6251	6.59699e-07	5	3.8039e-06	0	0	0.000167041	2.02768e-05	5.50981e-06	4.83045e-05	Bacteria;Proteobacteria;Gammaproteobacteria;Oceanospirillales;SUP05 cluster;uncultured gamma proteobacterium;uncultured gamma proteobacterium
g_test	py_mrc	AB440164.1.1430	25.5989	6.6708e-07	6	2.28234e-05	5.42523e-06	2.15892e-06	0.000169393	4.79271e-05	1.8366e-06	0	Bacteria;Proteobacteria;Epsilonproteobacteria;Campylobacterales;Helicobacteraceae;Sulfurovum;uncultured bacterium
g_test	py_mrc	AY704397.1.1475	24.8178	9.97688e-07	4	2.66273e-05	0	2.15892e-06	7.29333e-05	0.000112444	0	0	Bacteria;Proteobacteria;Epsilonproteobacteria;Campylobacterales;Helicobacteraceae;Sulfurimonas;uncultured epsilon proteobacterium
g_test	py_mrc	DQ925875.1.1395	24.5287	1.15637e-06	4	3.8039e-06	0.000153715	2.15892e-06	0	1.84335e-06	0	0	Bacteria;Proteobacteria;Epsilonproteobacteria;Campylobacterales;Campylobacteraceae;Campylobacter;uncultured epsilon proteobacterium
g_test	py_mrc	DQ228645.1.1439	23.0962	2.42796e-06	4	1.90195e-06	0	0	9.41075e-06	0.000108758	0	3.2203e-05	Bacteria;Bacteroidetes;Flavobacteriia;Flavobacteriales;Flavobacteriaceae;uncultured;uncultured bacterium
g_test	py_mrc	HQ153979.1.1370	23.0613	2.46634e-06	5	0.000135038	0.000112121	1.07946e-05	2.35269e-06	1.65901e-05	0	0	Bacteria;Proteobacteria;Epsilonproteobacteria;Campylobacterales;Helicobacteraceae;Sulfurovum;uncultured bacterium
g_test	py_mrc	New.CleanUp.ReferenceOTU29644	21.3524	5.99172e-06	4	3.8039e-06	0	0	6.11698e-05	6.08305e-05	1.8366e-06	0	Bacteria;Proteobacteria;Alphaproteobacteria;Rhodobacterales;Rhodobacteraceae
g_test	py_mrc	FN562850.1.1368	20.8818	7.64109e-06	7	0.00105368	7.77616e-05	0.00147454	4.4701e-05	5.34571e-05	2.20393e-05	4.83045e-05	Bacteria;Proteobacteria;Epsilonproteobacteria;Campylobacterales;Helicobacteraceae;Sulfurovum;uncultured epsilon proteobacterium
g_test	py_mrc	FJ792357.1.1332	20.8065	7.92847e-06	5	0.000239646	0.000788467	6.47675e-06	0.00146102	0.000108758	0	0	Bacteria;Proteobacteria;Epsilonproteobacteria;Campylobacterales;Campylobacteraceae;Sulfurospirillum;uncultured bacterium
g_test	py_mrc	FJ001805.1.1397	20.3027	1.02906e-05	4	0.000112215	9.22289e-05	0	9.41075e-06	1.29034e-05	0	0	Bacteria;BD1-5;uncultured bacterium;uncultured bacterium;uncultured bacterium;uncultured bacterium;uncultured bacterium
g_test	py_mrc	New.CleanUp.ReferenceOTU999629	20.1546	1.10919e-05	4	0	0	0	6.11698e-05	6.08305e-05	5.50981e-06	1.61015e-05	Bacteria;Proteobacteria;Alphaproteobacteria;Rhodobacterales;Rhodobacteraceae;Ruegeria
g_test	py_mrc	New.ReferenceOTU618	19.0185	2.00552e-05	4	1.71176e-05	5.42523e-06	0	0.000141161	2.58069e-05	0	0	Bacteria;Bacteroidetes;Flavobacteriia;Flavobacteriales;Cryomorphaceae;Fluviicola
g_test	py_mrc	New.ReferenceOTU2307	18.7941	2.25049e-05	5	9.31956e-05	0.000763149	0.000371334	4.70537e-06	1.29034e-05	0	0	Bacteria;Proteobacteria;Epsilonproteobacteria;Nautiliales;Nautiliaceae;Nitratifractor
g_test	py_mrc	JQ712411.1.1367	18.1242	3.1907e-05	5	6.46663e-05	6.32943e-05	2.15892e-06	0.000164688	0.000156685	0	0	Bacteria;Proteobacteria;Epsilonproteobacteria;Campylobacterales;Helicobacteraceae;Sulfurimonas;uncultured epsilon proteobacterium
g_test	py_mrc	New.ReferenceOTU1467	18.0854	3.24864e-05	4	0.000116019	9.04205e-06	0	7.05806e-05	0.000224889	0	0	Bacteria;Bacteroidetes;Flavobacteriia;Flavobacteriales;Flavobacteriaceae;uncultured;uncultured Bacteroidetes bacterium
g_test	py_mrc	JQ712381.1.1383	17.5785	4.23025e-05	6	0.00947362	0.00217009	0.000129535	0.00549588	0.00547106	5.50981e-06	0	Bacteria;Proteobacteria;Epsilonproteobacteria;Campylobacterales;Helicobacteraceae;Sulfurimonas;uncultured epsilon proteobacterium
g_test	py_mrc	EU265791.1.1505	17.4127	4.60469e-05	4	3.8039e-06	0	2.15892e-06	6.11698e-05	3.6867e-05	0	0	Bacteria;Proteobacteria;Gammaproteobacteria;Thiotrichales;Thiotrichaceae;uncultured;uncultured bacterium
g_test	py_mrc	New.CleanUp.ReferenceOTU695425	16.8915	6.04422e-05	4	9.50975e-05	1.80841e-06	0	5.17591e-05	0.000195395	0	0	Bacteria;Bacteroidetes;Flavobacteriia;Flavobacteriales;Cryomorphaceae;Owenweeksia;uncultured bacterium
g_test	py_mrc	New.ReferenceOTU1147	16.4508	7.60699e-05	4	9.50975e-06	1.80841e-06	0	9.41075e-05	2.76502e-05	0	0	Bacteria;Bacteroidetes;Flavobacteriia;Flavobacteriales;Flavobacteriaceae;Lutibacter;uncultured bacterium
g_test	py_mrc	New.ReferenceOTU360	16.1324	8.97776e-05	5	8.36858e-05	3.61682e-06	0	9.88128e-05	0.000151155	7.34642e-06	0	Bacteria;Proteobacteria;Gammaproteobacteria;Thiotrichales;Piscirickettsiaceae;Thiomicrospira;uncultured gamma proteobacterium
g_test	py_mrc	New.CleanUp.ReferenceOTU836964	16.0991	9.11504e-05	4	1.90195e-06	1.80841e-06	0	8.2344e-05	1.65901e-05	0	0	Bacteria;Proteobacteria;Epsilonproteobacteria;Campylobacterales;Helicobacteraceae;Sulfurimonas
g_test	py_mrc	AB842287.1.1428	16.0948	9.11504e-05	4	0.00014645	1.44673e-05	0	7.05806e-06	9.21674e-06	0	0	Bacteria;Proteobacteria;Epsilonproteobacteria;Campylobacterales;Helicobacteraceae;Sulfurovum;uncultured bacterium
g_test	py_mrc	AY531594.1.1459	15.603	0.000117929	5	3.23332e-05	9.04205e-06	4.31784e-06	0.000167041	1.65901e-05	0	0	Bacteria;Proteobacteria;Epsilonproteobacteria;Campylobacterales;Helicobacteraceae;Sulfurovum;uncultured bacterium
g_test	py_mrc	AF420351.1.1472	15.5247	0.000122628	4	0	0	2.80659e-05	5.88172e-05	3.87103e-05	0	0.000144914	Bacteria;Proteobacteria;Epsilonproteobacteria;Campylobacterales;Helicobacteraceae;Sulfurovum;uncultured bacterium
g_test	py_mrc	New.CleanUp.ReferenceOTU528763	15.2264	0.000143266	4	0	1.80841e-06	8.85156e-05	2.35269e-06	0	1.8366e-06	0	Bacteria;Proteobacteria;Epsilonproteobacteria;Nautiliales;Nautiliaceae;Nitratifractor;uncultured bacterium
g_test	py_mrc	AF354608.1.1499	15.0867	0.000153906	4	5.70585e-06	1.80841e-06	0	3.05849e-05	6.26739e-05	0	0	Bacteria;Proteobacteria;Gammaproteobacteria;Thiotrichales;Piscirickettsiaceae;Thiomicrospira;uncultured gamma proteobacterium
g_test	py_mrc	FR853023.1.1523	15.0532	0.000156304	5	0.00118682	1.80841e-06	0.000282818	5.88172e-05	0.000237792	0	0	Bacteria;Proteobacteria;Deltaproteobacteria;Desulfobacterales;Desulfobulbaceae;Desulfobulbus;uncultured bacterium
g_test	py_mrc	New.CleanUp.ReferenceOTU986809	14.7288	0.000185197	4	0.000116019	8.68037e-05	0	0	3.31803e-05	1.8366e-06	0	Bacteria;Proteobacteria;Epsilonproteobacteria;Campylobacterales;Helicobacteraceae;Sulfurimonas;uncultured bacterium
g_test	py_mrc	GU369923.1.1384	13.9711	0.000276327	4	1.90195e-06	0	6.47675e-06	5.64645e-05	1.65901e-05	0	0	Bacteria;Proteobacteria;Epsilonproteobacteria;Campylobacterales;Helicobacteraceae;Sulfurovum;uncultured epsilon proteobacterium
g_test	py_mrc	AB476174.1.1430	13.9222	0.000282948	5	1.90195e-06	1.80841e-06	4.31784e-06	7.76387e-05	7.37339e-06	0	0	Bacteria;Proteobacteria;Epsilonproteobacteria;Campylobacterales;Helicobacteraceae;Sulfurovum;uncultured bacterium
g_test	py_mrc	AY280425.1.1435	13.7506	0.000309303	5	0.00158242	0.000524439	0.00240503	7.05806e-06	1.65901e-05	0	0	Bacteria;BHI80-139
g_test	py_mrc	GQ357037.1.1474	13.4036	0.000371259	5	0.00138652	0.000119355	0	5.41118e-05	0.000694942	0	8.05075e-05	Bacteria;Proteobacteria;Epsilonproteobacteria;Campylobacterales;Helicobacteraceae;Sulfurimonas;uncultured bacterium
g_test	py_mrc	New.CleanUp.ReferenceOTU93138	13.0566	0.000445731	4	1.90195e-06	0	0	2.11742e-05	5.16138e-05	1.8366e-06	0	Unassigned
g_test	py_mrc	JX403058.1.1513	12.9785	0.000463653	4	0.000104607	0.000368916	0	0.000136456	5.89872e-05	0	0	Bacteria;Proteobacteria;Epsilonproteobacteria;Campylobacterales;Helicobacteraceae;Sulfurimonas
g_test	py_mrc	GU291345.1.1506	12.4854	0.000602156	4	3.8039e-06	0	0	5.17591e-05	0.0003742	0.000273654	0	Bacteria;Proteobacteria;Deltaproteobacteria;Desulfuromonadales;Desulfuromonadaceae;Desulfuromusa;uncultured bacterium
g_test	py_mrc	JQ611114.1.1326	12.3104	0.000659827	7	0.0012648	6.69112e-05	0.000207256	3.52903e-05	0.000442404	5.50981e-06	4.83045e-05	Bacteria;Proteobacteria;Epsilonproteobacteria;Campylobacterales;Helicobacteraceae;Sulfurovum;uncultured epsilon proteobacterium
g_test	py_mrc	KF465246.1.1307	12.1803	0.000705876	4	0.000116019	1.80841e-05	2.15892e-06	1.64688e-05	0	0	0	Bacteria;Proteobacteria;Epsilonproteobacteria;Campylobacterales;Helicobacteraceae;Sulfurovum;uncultured bacterium
g_test	py_mrc	AY263403.1.1472	11.9937	0.000778414	5	0.0027274	0.00202361	0.00330746	7.05806e-05	0	1.8366e-06	0	Bacteria;Aquificae;Aquificae;Aquificales;Desulfurobacteriaceae;Thermovibrio
g_test	py_mrc	New.ReferenceOTU446	11.2279	0.00117233	4	0.00044886	0	8.63567e-06	2.58796e-05	0.000127191	0	0	Bacteria;Proteobacteria;Deltaproteobacteria;Desulfobacterales;Desulfobulbaceae;Desulfobulbus
g_test	py_mrc	New.CleanUp.ReferenceOTU396210	11.019	0.0013092	4	2.28234e-05	1.80841e-06	0	5.64645e-05	5.53005e-05	0	0	Bacteria;Proteobacteria;Gammaproteobacteria;Thiotrichales;Piscirickettsiaceae;Thiomicrospira;uncultured gamma proteobacterium
g_test	py_mrc	GU220741.1.1462	10.7991	0.00147087	5	1.33137e-05	1.26589e-05	4.96551e-05	6.35225e-05	9.21674e-06	0	0	Bacteria;Proteobacteria;Epsilonproteobacteria;Campylobacterales;Helicobacteraceae;Sulfurimonas;uncultured bacterium
g_test	py_mrc	New.ReferenceOTU226	10.5537	0.0016758	4	0.000116019	1.26589e-05	1.72713e-05	2.35269e-06	0	0	0	Bacteria;Proteobacteria;Epsilonproteobacteria;Nautiliales;Nautiliaceae;Caminibacter
g_test	py_mrc	New.CleanUp.ReferenceOTU514357	10.2409	0.00198073	5	3.8039e-05	1.80841e-06	0.000125217	7.05806e-06	5.53005e-06	0	0	Bacteria;Proteobacteria;Epsilonproteobacteria;Campylobacterales;Helicobacteraceae;Sulfurovum;uncultured bacterium
g_test	py_mrc	New.CleanUp.ReferenceOTU329652	9.67131	0.00269288	4	4.37449e-05	3.25514e-05	2.15892e-06	2.35269e-06	0	0	0	Bacteria;Proteobacteria;Epsilonproteobacteria;Campylobacterales;Helicobacteraceae;Sulfurimonas;uncultured bacterium
g_test	py_mrc	JF738106.1.1522	9.54581	0.00287694	4	0	1.80841e-06	2.15892e-06	3.99957e-05	1.47468e-05	0	0	Bacteria;Proteobacteria;Zetaproteobacteria;Mariprofundales;Mariprofundaceae;Mariprofundus;uncultured bacterium
g_test	py_mrc	New.ReferenceOTU2526	9.26777	0.0033406	4	9.69995e-05	5.42523e-06	0	2.35269e-06	9.21674e-06	0	0	Bacteria;Proteobacteria;Epsilonproteobacteria;Campylobacterales;Helicobacteraceae;Sulfurovum;uncultured bacterium
g_test	py_mrc	New.CleanUp.ReferenceOTU132971	9.17119	0.00351377	4	8.55878e-05	3.61682e-06	0	4.70537e-06	3.6867e-06	0	0	Bacteria;Proteobacteria;Gammaproteobacteria;Thiotrichales;Piscirickettsiaceae;Thiomicrospira;uncultured bacterium
g_test	py_mrc	JQ712385.1.1383	9.08573	0.00367367	4	3.8039e-06	1.08505e-05	0	8.94021e-05	3.6867e-06	0	0	Bacteria;Proteobacteria;Epsilonproteobacteria;Campylobacterales;Helicobacteraceae;Sulfurimonas;uncultured bacterium
g_test	py_mrc	New.CleanUp.ReferenceOTU22432	8.95762	0.00393171	4	0.000239646	0	4.74962e-05	1.17634e-05	1.65901e-05	0	0	Bacteria;Proteobacteria;Deltaproteobacteria;Desulfobacterales;Desulfobulbaceae;Desulfobulbus;uncultured bacterium
g_test	py_mrc	FJ640814.1.1486	8.64763	0.00464959	4	0	0	0	3.05849e-05	0.00567751	0.00444458	0.0191125	Bacteria;Bacteroidetes;Cytophagia;Cytophagales;Flammeovirgaceae;Reichenbachiella;uncultured Bacteroidetes bacterium
g_test	py_mrc	JQ712439.1.1383	8.52984	0.00494942	6	7.6078e-06	2.71261e-05	2.15892e-06	9.41075e-05	2.94936e-05	0	1.61015e-05	Bacteria;Proteobacteria;Epsilonproteobacteria;Campylobacterales;Helicobacteraceae;Sulfurimonas;uncultured bacterium
g_test	py_mrc	New.ReferenceOTU433	8.49573	0.00503203	5	0.000336645	7.41448e-05	0	0.000105871	7.37339e-05	1.8366e-06	0	Bacteria;Proteobacteria;Gammaproteobacteria;Thiotrichales;Piscirickettsiaceae;Thiomicrospira;uncultured gamma proteobacterium
g_test	py_mrc	New.ReferenceOTU1930	8.40917	0.00526578	5	2.85293e-05	3.61682e-06	0	3.99957e-05	7.55773e-05	7.34642e-06	0	Bacteria;Proteobacteria;Gammaproteobacteria;Thiotrichales;Piscirickettsiaceae;Thiomicrospira;uncultured gamma proteobacterium
g_test	py_mrc	HE610326.1.1515	7.91817	0.00688796	4	6.84702e-05	0	0	9.64601e-05	6.63605e-05	1.8366e-06	0	Bacteria;Fusobacteria;Fusobacteriia;Fusobacteriales;Fusobacteriaceae;Psychrilyobacter
g_test	py_mrc	EU265970.1.1470	7.85329	0.00712404	6	0.000184489	0.000171799	0	0.000112929	4.79271e-05	1.8366e-06	1.61015e-05	Bacteria;Proteobacteria;Epsilonproteobacteria;Campylobacterales;Helicobacteraceae;Sulfurimonas;uncultured bacterium
g_test	py_mrc	JQ712421.1.1380	7.81709	0.00725234	5	6.46663e-05	4.52102e-05	1.07946e-05	0	9.21674e-06	1.8366e-06	0	Bacteria;Proteobacteria;Epsilonproteobacteria;Campylobacterales;Helicobacteraceae;Sulfurovum;uncultured epsilon proteobacterium
g_test	py_mrc	GQ848466.1.1517	7.42395	0.00899945	5	0.000106509	3.61682e-06	0	1.64688e-05	7.37339e-06	0	4.83045e-05	Bacteria;Proteobacteria;Gammaproteobacteria;Alteromonadales;Colwelliaceae;Colwellia;uncultured bacterium
g_test	py_mrc	New.CleanUp.ReferenceOTU194132	7.21444	0.0100903	4	2.85293e-05	1.80841e-06	0	9.41075e-05	1.29034e-05	0	0	Bacteria;Bacteroidetes;Flavobacteriia;Flavobacteriales;Flavobacteriaceae;Lutibacter;uncultured bacterium
g_test	py_mrc	New.ReferenceOTU2187	7.0968	0.0107511	5	9.31956e-05	1.80841e-06	0	7.05806e-06	1.29034e-05	0	0.000112711	Bacteria;Proteobacteria;Gammaproteobacteria;Alteromonadales;Colwelliaceae;Colwellia
g_test	py_mrc	AY225614.1.1436	6.90957	0.0119062	4	6.27644e-05	9.76541e-05	1.94303e-05	3.29376e-05	0	0	0	Bacteria;Proteobacteria;Epsilonproteobacteria;Campylobacterales;Helicobacteraceae;Sulfurovum;uncultured epsilon proteobacterium
g_test	py_mrc	New.ReferenceOTU2436	6.90642	0.0119062	4	6.27644e-05	1.08505e-05	4.31784e-06	4.70537e-06	0	0	0	Bacteria;Proteobacteria;Epsilonproteobacteria;Campylobacterales;Campylobacteraceae;Thiofractor;uncultured bacterium
g_test	py_mrc	New.ReferenceOTU805	6.69632	0.0133643	4	1.90195e-06	1.80841e-05	0	4.4701e-05	3.50236e-05	0	0	Bacteria;Proteobacteria;Gammaproteobacteria;Thiotrichales;Piscirickettsiaceae;Thiomicrospira;uncultured gamma proteobacterium
g_test	py_mrc	AB842286.1.1461	6.6837	0.0134305	5	7.6078e-06	0	0	0.000214094	0.00100278	0.000168968	0.00887193	Bacteria;Verrucomicrobia;Verrucomicrobiae;Verrucomicrobiales;DEV007;uncultured bacterium;uncultured bacterium
g_test	py_mrc	GU235798.1.1298	6.67637	0.0134571	4	0	1.80841e-06	0	9.41075e-06	0.000125348	0	0.000579654	Bacteria;Proteobacteria;Alphaproteobacteria;Rhodobacterales;Rhodobacteraceae;Roseobacter clade NAC11-7 lineage
g_test	py_mrc	GQ261792.1.1462	6.63219	0.0137655	4	0	0	0	1.41161e-05	3.31803e-05	1.8366e-06	3.2203e-05	Bacteria;Proteobacteria;Epsilonproteobacteria;Campylobacterales;Helicobacteraceae;Sulfurimonas;uncultured epsilon proteobacterium
g_test	py_mrc	New.ReferenceOTU1047	6.5328	0.0145251	4	0.000684702	0.000338173	0.000604497	3.05849e-05	0	0	0	Bacteria;Aquificae;Aquificae;Aquificales;Desulfurobacteriaceae;Thermovibrio
g_test	py_mrc	New.CleanUp.ReferenceOTU157005	6.28692	0.0166472	4	0.000157862	1.62757e-05	0	0.000167041	0.000108758	0	0	Bacteria;BD1-5
g_test	py_mrc	New.CleanUp.ReferenceOTU495270	6.06964	0.018777	4	5.89605e-05	1.44673e-05	8.63567e-06	2.35269e-06	0	0	0	Bacteria;Proteobacteria;Epsilonproteobacteria;Campylobacterales;Helicobacteraceae;Sulfurovum
g_test	py_mrc	New.ReferenceOTU2030	6.06643	0.018777	4	1.52156e-05	1.80841e-06	0	4.23484e-05	2.76502e-05	0	0	Bacteria;Proteobacteria;Epsilonproteobacteria;Campylobacterales;Helicobacteraceae;Sulfurovum
g_test	py_mrc	AY225618.1.1425	5.70841	0.0229619	5	8.36858e-05	8.13784e-05	1.29535e-05	4.70537e-05	1.84335e-06	0	0	Bacteria;Proteobacteria;Epsilonproteobacteria;Campylobacterales;Helicobacteraceae;Sulfurovum;uncultured epsilon proteobacterium
g_test	py_mrc	New.ReferenceOTU1749	5.65319	0.0236464	4	0	0	2.15892e-06	2.82322e-05	7.37339e-06	1.8366e-06	0	Bacteria;Proteobacteria;Zetaproteobacteria;Mariprofundales;Mariprofundaceae;Mariprofundus;uncultured bacterium
g_test	py_mrc	New.CleanUp.ReferenceOTU865726	5.50372	0.0256992	6	4.18429e-05	5.42523e-06	2.15892e-06	4.4701e-05	6.26739e-05	1.8366e-06	0	Bacteria;Proteobacteria;Gammaproteobacteria;Thiotrichales;Piscirickettsiaceae;Thiomicrospira;uncultured gamma proteobacterium
g_test	py_mrc	New.CleanUp.ReferenceOTU1114162	5.31337	0.0286002	4	3.8039e-05	1.80841e-05	0	4.70537e-06	1.84335e-06	0	0	Bacteria;Proteobacteria;Epsilonproteobacteria;Campylobacterales;Helicobacteraceae;Sulfurimonas;uncultured bacterium
g_test	py_mrc	New.CleanUp.ReferenceOTU927414	5.30347	0.0287032	6	4.75488e-05	7.23364e-06	2.15892e-06	0.000103518	2.39635e-05	1.8366e-06	0	Bacteria;Proteobacteria;Gammaproteobacteria;Thiotrichales;Piscirickettsiaceae;Thiomicrospira;uncultured bacterium
g_test	py_mrc	DQ270624.1.1491	5.22075	0.0300375	4	0.000313822	5.42523e-06	0	0.000357608	8.29507e-05	0	0	Bacteria;Proteobacteria;Gammaproteobacteria;Thiotrichales;Piscirickettsiaceae;Thiomicrospira;uncultured gamma proteobacterium
g_test	py_mrc	FN553949.1.1479	4.97373	0.0345632	4	0	0	0	2.35269e-06	0.000558535	3.67321e-06	0.00460503	Bacteria;Bacteroidetes;Cytophagia;Cytophagales;Flammeovirgaceae;uncultured;uncultured bacterium
g_test	py_mrc	New.CleanUp.ReferenceOTU15196	4.70192	0.0403803	4	0	0	2.15892e-06	3.99957e-05	1.84335e-06	0	4.83045e-05	Bacteria;Bacteroidetes;Flavobacteriia;Flavobacteriales;Flavobacteriaceae;Ulvibacter;uncultured Bacteroidetes bacterium
g_test	py_mrc	AY531597.1.1476	4.63612	0.0418705	5	6.08624e-05	7.23364e-06	5.1814e-05	6.58752e-05	1.84335e-05	0	0	Bacteria;Proteobacteria;Epsilonproteobacteria;Campylobacterales;Helicobacteraceae;Sulfurovum;uncultured bacterium
g_test	py_mrc	JN662103.1.1356	4.51113	0.0449464	4	7.6078e-06	0	0	4.70537e-05	3.6867e-06	1.8366e-06	0	Bacteria;Proteobacteria;Epsilonproteobacteria;Campylobacterales;Campylobacteraceae;Campylobacter;uncultured bacterium
g_test	py_mrc	New.CleanUp.ReferenceOTU522366	4.38488	0.0482954	4	0	0	0	9.41075e-06	6.82039e-05	3.30589e-05	1.61015e-05	Bacteria;Verrucomicrobia;Verrucomicrobiae;Verrucomicrobiales;DEV007;uncultured bacterium;uncultured bacterium
py/mrc=pyrite/marcasite (FeS2)

## Sheet: Bac sp
Supplementary Table S6: significant differences between counts in distinct bacterial and archaeal groups found in relation to mineralogy.
						active chimneys			inactive chimneys
Test	Variable	#OTU ID	Test-Statistic	FDR_P	n_sites	S5	S6	S8	S7	S1	S2	S4	taxonomy
g_test	sp	AB858534.1.1408	469568	0	4	0	0	0	0.00012234	0.000453464	0.393849	0.000788974	Bacteria;Proteobacteria;Deltaproteobacteria;Desulfobacterales;Desulfobulbaceae;Desulfobulbus;uncultured bacterium
g_test	sp	GQ867408.1.1451	448995	0	7	3.04312e-05	3.25514e-05	0.00261877	4.70537e-06	0.000116131	0.379116	0.00053135	Bacteria;Proteobacteria;Gammaproteobacteria;Enterobacteriales;Enterobacteriaceae;Escherichia-Shigella
g_test	sp	FJ820437.1.1482	115775	0	6	0.025412	0.473491	0.000157601	0.00813324	9.40108e-05	0	8.05075e-05	Bacteria;Proteobacteria;Epsilonproteobacteria;Campylobacterales;Helicobacteraceae;Sulfurimonas;uncultured bacterium
g_test	sp	JQ712402.1.1377	81462.9	0	7	0.173901	0.0226395	0.00674014	0.000178804	0.000110601	1.10196e-05	4.83045e-05	Bacteria;Proteobacteria;Epsilonproteobacteria;Campylobacterales;Helicobacteraceae;Sulfurovum;uncultured bacterium
g_test	sp	AY531584.1.1473	71152.4	0	5	0.000197803	4.52102e-05	0.282332	8.46967e-05	0	5.50981e-06	0	Bacteria;Proteobacteria;Epsilonproteobacteria;Nautiliales;Nautiliaceae;Nitratifractor;uncultured bacterium
g_test	sp	HM557570.1.1378	35232.1	0	6	3.8039e-06	1.80841e-06	0.0002785	0	1.10601e-05	0.0298448	8.05075e-05	Bacteria;Proteobacteria;Gammaproteobacteria;Xanthomonadales;Xanthomonadaceae;Stenotrophomonas
g_test	sp	New.ReferenceOTU1843	23295.1	0	6	2.47254e-05	1.08505e-05	0.0918792	0.000211742	3.31803e-05	5.50981e-06	0	Bacteria;Proteobacteria;Deltaproteobacteria;Desulfobacterales;Desulfobulbaceae;Desulfobulbus
g_test	sp	New.ReferenceOTU2026	22857	0	5	7.6078e-06	9.04205e-06	0.0012349	0.0963919	0.000234105	0	0	Bacteria;Proteobacteria;Gammaproteobacteria;Methylococcales;Marine Methylotrophic Group 2;uncultured gamma proteobacterium;uncultured gamma proteobacterium
g_test	sp	New.ReferenceOTU190	21761.4	0	5	0	0	1.94303e-05	0.00118811	7.18906e-05	0.0192274	0.000144914	Bacteria;Proteobacteria;Deltaproteobacteria;Desulfobacterales;Desulfobulbaceae;Desulfobulbus;uncultured bacterium
g_test	sp	JQ287449.1.1504	21185.4	0	7	0.0558736	0.00882866	0.000781528	0.06492	0.130201	0.00526555	4.83045e-05	Bacteria;Proteobacteria;Gammaproteobacteria;Thiotrichales;Piscirickettsiaceae;Thiomicrospira;uncultured gamma proteobacterium
g_test	sp	KC294233.1.1370	20488	0	4	0	0	2.15892e-06	0	7.37339e-06	0.0171667	4.83045e-05	Bacteria;Actinobacteria;Actinobacteria;Micrococcales;Micrococcaceae;Kocuria
g_test	sp	AY531572.1.1473	20213.9	0	6	0.0477789	0.00598222	0.00199916	0.00793091	0.000923518	9.18302e-06	0	Bacteria;Proteobacteria;Epsilonproteobacteria;Campylobacterales;Helicobacteraceae;Sulfurovum;uncultured bacterium
g_test	sp	EF444735.1.1240	20033.4	0	5	0.0351842	0.000160948	1.07946e-05	9.41075e-06	1.84335e-06	0	0	Bacteria;Proteobacteria;Epsilonproteobacteria;Campylobacterales;Helicobacteraceae;Sulfurimonas;uncultured bacterium
g_test	sp	AY531587.1.1446	19966.6	0	6	0.0272131	0.00260954	0.0990274	0.0164853	0.0077734	4.40785e-05	0	Bacteria;Proteobacteria;Epsilonproteobacteria;Campylobacterales;Helicobacteraceae;Sulfurovum;uncultured bacterium
g_test	sp	DQ456289.1.1457	19636	0	6	1.90195e-06	3.61682e-06	0.000142489	0	1.47468e-05	0.016647	8.05075e-05	Bacteria;Proteobacteria;Gammaproteobacteria;Enterobacteriales;Enterobacteriaceae;Enterobacter;uncultured bacterium
g_test	sp	FN562856.1.1370	17978	0	7	0.0319376	0.0332567	0.0242706	0.0454704	0.00424708	1.8366e-05	8.05075e-05	Bacteria;Proteobacteria;Epsilonproteobacteria;Campylobacterales;Helicobacteraceae;Sulfurovum;uncultured epsilon proteobacterium
g_test	sp	AY327884.1.1457	17608.4	0	7	1.90195e-05	3.61682e-06	0.000751303	0.0685549	0.00510239	1.8366e-06	4.83045e-05	Bacteria;Bacteroidetes;Flavobacteriia;Flavobacteriales;Flavobacteriaceae;Lutibacter;uncultured bacterium
g_test	sp	New.ReferenceOTU1163	17349.8	0	5	0.0316884	0.000672728	0.000144648	7.05806e-06	0	1.8366e-06	0	Bacteria;Proteobacteria;Epsilonproteobacteria;Nautiliales;Nautiliaceae;Thioreductor
g_test	sp	EU574671.1.1438	16720	0	6	0.00548142	0.0712278	6.26086e-05	0.00243738	0.000114288	0	3.2203e-05	Bacteria;Proteobacteria;Epsilonproteobacteria;Campylobacterales;Helicobacteraceae;Sulfurimonas
g_test	sp	FJ905684.1.1378	15822	0	7	0.00127431	0.00059135	0.000680059	0.0612663	0.0120629	3.67321e-05	0.000692365	Bacteria;Proteobacteria;Epsilonproteobacteria;Campylobacterales;Helicobacteraceae;Sulfurovum;uncultured bacterium
g_test	sp	New.ReferenceOTU633	14336.1	0	4	0.0248889	3.61682e-06	1.07946e-05	7.05806e-06	0	0	0	Bacteria;Caldiserica;Caldisericia;Caldisericales;Caldisericaceae;Caldisericum
g_test	sp	AY251057.1.1427	13579.3	0	6	0.0360667	0.0441596	0.00537786	1.17634e-05	5.53005e-06	3.67321e-06	0	Bacteria;Proteobacteria;Epsilonproteobacteria;Nautiliales;Nautiliaceae;uncultured
g_test	sp	New.ReferenceOTU9	12800.9	0	5	0.000401312	0.0448594	5.1814e-05	4.70537e-06	9.21674e-06	0	0	Bacteria;Proteobacteria;Epsilonproteobacteria;Nautiliales;Nautiliaceae;uncultured
g_test	sp	AY225615.1.1425	12416.1	0	7	0.0338015	0.0382858	2.15892e-05	0.000519944	9.03241e-05	1.8366e-06	1.61015e-05	Bacteria;Proteobacteria;Epsilonproteobacteria;Campylobacterales;Helicobacteraceae;Sulfurimonas;uncultured bacterium
g_test	sp	JF155704.1.1375	11003	0	4	0	0	4.74962e-05	0	5.53005e-06	0.00927485	1.61015e-05	Bacteria;Proteobacteria;Gammaproteobacteria;Pseudomonadales;Moraxellaceae;Enhydrobacter
g_test	sp	JF076235.1.1372	10568.9	0	5	7.6078e-06	0	0.000146806	0	3.6867e-06	0.00903426	3.2203e-05	Bacteria;Firmicutes;Bacilli;Bacillales;Staphylococcaceae;Staphylococcus
g_test	sp	New.ReferenceOTU2391	10502.9	0	5	0.018797	9.40373e-05	0.000172713	7.05806e-06	2.21202e-05	0	0	Bacteria;Proteobacteria;Deltaproteobacteria;Desulfurellales;Desulfurellaceae;Hippea
g_test	sp	New.ReferenceOTU1895	10459	0	4	0.0183881	8.13784e-05	1.07946e-05	1.41161e-05	0	0	0	Bacteria;Proteobacteria;Epsilonproteobacteria;Campylobacterales;Helicobacteraceae;Sulfurimonas;uncultured bacterium
g_test	sp	AY251062.1.1454	10420	0	6	0.00704102	0.00105973	0.0595408	4.23484e-05	8.11073e-05	5.50981e-06	0	Bacteria;Proteobacteria;Epsilonproteobacteria;Nautiliales;Nautiliaceae;Nitratifractor;uncultured bacterium
g_test	sp	JF214014.1.1341	10307.3	0	4	0	0	9.71513e-05	0	3.6867e-06	0.0087404	1.61015e-05	Bacteria;Actinobacteria;Actinobacteria;Propionibacteriales;Propionibacteriaceae;Propionibacterium;uncultured bacterium
g_test	sp	AB476182.1.1462	10182	0	7	0.000273881	3.61682e-06	0.000371334	0.0343186	0.0090748	3.67321e-06	1.61015e-05	Bacteria;Proteobacteria;Gammaproteobacteria;Thiotrichales;Thiotrichaceae;uncultured;uncultured bacterium
g_test	sp	DQ270642.1.1451	9471.89	0	5	5.70585e-06	1.80841e-06	0.000170555	0.0378336	0.0020793	0	0	Bacteria;Proteobacteria;Alphaproteobacteria;SB1-18;uncultured bacterium;uncultured bacterium;uncultured bacterium
g_test	sp	New.ReferenceOTU79	9451	0	4	0	0	0	5.64645e-05	0.0366255	0.000462824	1.61015e-05	Bacteria;Proteobacteria;Gammaproteobacteria;Thiotrichales;Piscirickettsiaceae;endosymbionts;uncultured bacterium
g_test	sp	FJ497650.1.1461	9104.77	0	4	0	0	0	1.88215e-05	0.000383416	3.30589e-05	0.143158	Bacteria;Proteobacteria;Gammaproteobacteria;Thiotrichales;Thiotrichaceae;uncultured;uncultured sediment bacterium
g_test	sp	New.ReferenceOTU2421	9079.18	0	5	7.6078e-06	1.80841e-06	0.035566	0.000207036	4.2397e-05	0	0	Bacteria;Aquificae;Aquificae;Aquificales;Desulfurobacteriaceae;Desulfurobacterium
g_test	sp	FJ192817.1.1458	8466.13	0	4	0	0	0.000222369	0	1.84335e-06	0.00730601	3.2203e-05	Bacteria;Proteobacteria;Betaproteobacteria;Burkholderiales;Comamonadaceae;Delftia;Delftia tsuruhatensis
g_test	sp	New.ReferenceOTU2480	8434.69	0	7	0.00247063	0.000247752	0.000205097	0.0178687	0.0227101	1.8366e-06	1.61015e-05	Bacteria;Proteobacteria;Epsilonproteobacteria;Campylobacterales;Helicobacteraceae;Sulfurimonas;uncultured bacterium
g_test	sp	CP002683.864391.865952	8429.34	0	5	9.50975e-06	7.23364e-06	0.0331739	7.76387e-05	2.02768e-05	0	0	Bacteria;Thermodesulfobacteria;Thermodesulfobacteria;Thermodesulfobacteriales;Thermodesulfobacteriaceae;Thermodesulfatator
g_test	sp	New.ReferenceOTU1168	8301.88	0	5	1.14117e-05	1.80841e-06	0.000606656	0.0277099	0.00577521	0	0	Bacteria;Bacteroidetes;Flavobacteriia;Flavobacteriales;Flavobacteriaceae
g_test	sp	JQ712373.1.1376	8298.73	0	7	5.70585e-06	3.61682e-06	0.000371334	0.0359138	0.000975131	1.8366e-06	0.00169066	Bacteria;Proteobacteria;Epsilonproteobacteria;Campylobacterales;Helicobacteraceae;Sulfurimonas;uncultured bacterium
g_test	sp	New.ReferenceOTU2516	8195.75	0	7	0.000412723	5.42523e-06	0.000265547	0.0255972	0.0195008	0.001214	0.000466944	Bacteria;Bacteroidetes;Flavobacteriia;Flavobacteriales;Flavobacteriaceae;Lutibacter;uncultured bacterium
g_test	sp	FN562844.1.1365	8006.13	0	7	0.0215472	0.00649581	0.000610974	0.00408191	0.00180832	4.22419e-05	8.05075e-05	Bacteria;Proteobacteria;Epsilonproteobacteria;Campylobacterales;Helicobacteraceae;Sulfurovum;uncultured epsilon proteobacterium
g_test	sp	New.ReferenceOTU883	7873.7	0	5	0.0137074	3.61682e-06	6.47675e-06	4.70537e-06	0	1.8366e-06	0	Bacteria;Proteobacteria;Epsilonproteobacteria;Nautiliales;Nautiliaceae;Caminibacter
g_test	sp	AB095118.1.1050	7821.22	0	4	1.90195e-06	0.000231476	0.0304774	2.82322e-05	0	0	0	Archaea;Euryarchaeota;Methanococci;Methanococcales;Methanocaldococcaceae;Methanocaldococcus
g_test	sp	JN662285.1.1386	7801.87	0	6	0.0157386	0.00113026	0.000507346	4.94064e-05	2.21202e-05	1.8366e-06	0	Bacteria;Proteobacteria;Epsilonproteobacteria;Campylobacterales;Helicobacteraceae;Sulfurovum
g_test	sp	JQ287020.1.1482	7568.21	0	6	3.8039e-06	1.80841e-06	0.000274183	0.0334293	0.00620655	0.000920139	0	Bacteria;Bacteroidetes;Cytophagia;Cytophagales;Flammeovirgaceae;Flexithrix
g_test	sp	New.ReferenceOTU1615	7415.97	0	5	1.14117e-05	1.80841e-06	0.0292555	1.64688e-05	3.6867e-05	0	0	Bacteria;Thermodesulfobacteria;Thermodesulfobacteria;Thermodesulfobacteriales;Thermodesulfobacteriaceae;Thermodesulfatator
g_test	sp	JN662209.1.1349	7383.9	0	7	0.0040968	0.0276144	1.29535e-05	0.00971189	0.000224889	5.50981e-06	0.000837278	Bacteria;Proteobacteria;Epsilonproteobacteria;Campylobacterales;Helicobacteraceae;Sulfurimonas;uncultured bacterium
g_test	sp	AB100010.1.1315	7334.04	0	5	9.12936e-05	0	0	0.000101166	0.0393223	0.00677156	4.83045e-05	Bacteria;Bacteroidetes;VC2,1 Bac22;uncultured alpha proteobacterium;uncultured alpha proteobacterium;uncultured alpha proteobacterium;uncultured alpha proteobacterium
g_test	sp	FJ497620.1.1420	7158.78	0	5	0.0182777	0.0269996	1.51124e-05	0.000232916	0.00111338	0	0	Bacteria;Proteobacteria;Epsilonproteobacteria;Campylobacterales;Campylobacteraceae;Sulfurospirillum;uncultured bacterium
g_test	sp	HQ757403.1.1452	7155.84	0	5	1.90195e-06	0	1.29535e-05	0	3.6867e-06	0.00602039	1.61015e-05	Bacteria;Proteobacteria;Gammaproteobacteria;Enterobacteriales;Enterobacteriaceae;Enterobacter
g_test	sp	AB842295.1.1433	7094.68	0	6	0.019651	0.0148	0.000103628	0.00315495	0.000291249	9.18302e-06	0	Bacteria;Proteobacteria;Epsilonproteobacteria;Campylobacterales;Helicobacteraceae;Sulfurovum;uncultured bacterium
g_test	sp	FR852972.1.1536	7076.69	0	5	7.6078e-06	6.69112e-05	0.0280098	7.05806e-06	0	5.50981e-06	0	Bacteria;Proteobacteria;Deltaproteobacteria;Desulfovibrionales;Desulfohalobiaceae;Desulfothermus
g_test	sp	JQ287102.1.1446	7045.41	0	5	1.90195e-06	0	0	0.000585819	0.0250677	1.10196e-05	0.00196438	Bacteria;Proteobacteria;Alphaproteobacteria;Rhizobiales;Hyphomicrobiaceae;uncultured;uncultured bacterium
g_test	sp	New.ReferenceOTU1465	7004.52	0	4	0	0	0	0.0016163	0.0358015	0.00388442	1.61015e-05	Bacteria;Proteobacteria;Gammaproteobacteria;Xanthomonadales;uncultured
g_test	sp	AY531562.1.1495	6969.67	0	4	0.0124825	0.000162757	0	2.35269e-06	1.65901e-05	0	0	Bacteria;Bacteroidetes;Flavobacteriia;Flavobacteriales;R103-B20;uncultured bacterium;uncultured bacterium
g_test	sp	GU940889.1.1356	6767.21	0	6	7.6078e-06	9.04205e-06	0.000131694	0	3.6867e-06	0.00584775	6.4406e-05	Bacteria;Proteobacteria;Gammaproteobacteria;Pseudomonadales;Pseudomonadaceae;uncultured;uncultured bacterium
g_test	sp	JQ611151.1.1378	6748.17	0	4	1.71176e-05	3.61682e-06	0.0267447	7.05806e-06	0	0	0	Bacteria;Proteobacteria;Epsilonproteobacteria;Nautiliales;Nautiliaceae;Nitratifractor;uncultured bacterium
g_test	sp	New.ReferenceOTU2465	6703.88	0	4	0.0116418	3.61682e-06	4.31784e-06	2.35269e-06	0	0	0	Bacteria;Proteobacteria;Epsilonproteobacteria;Campylobacterales;Helicobacteraceae;Sulfurimonas;uncultured bacterium
g_test	sp	FR852970.1.1474	6701.68	0	6	0.016935	0.00754469	4.74962e-05	5.41118e-05	7.37339e-06	1.8366e-06	0	Bacteria;Proteobacteria;Epsilonproteobacteria;Campylobacterales;Helicobacteraceae;Sulfurovum;uncultured bacterium
g_test	sp	DQ228627.1.1360	6437.84	0	4	0.00959534	0.0274734	0.00721726	2.11742e-05	0	0	0	Archaea;Euryarchaeota;Archaeoglobi;Archaeoglobales;Archaeoglobaceae;uncultured;uncultured archaeon
g_test	sp	JQ287054.1.1513	6181.58	0	5	0	3.61682e-06	0	9.88128e-05	0.0216243	5.69347e-05	1.61015e-05	Bacteria;Proteobacteria;Gammaproteobacteria
g_test	sp	New.ReferenceOTU1263	6090.96	0	4	0.0113451	0.000164565	0.00031952	0	5.53005e-06	0	0	Bacteria;Proteobacteria;Epsilonproteobacteria;Nautiliales;Nautiliaceae;Nitratifractor;uncultured bacterium
g_test	sp	DQ146934.1.1433	5791.34	0	4	0	1.80841e-06	0	0	3.6867e-06	0.00487068	4.83045e-05	Bacteria;Proteobacteria;Gammaproteobacteria;Vibrionales;Vibrionaceae;Photobacterium;Photobacterium leiognathi
g_test	sp	JN662233.1.1483	5786.96	0	6	0.000119823	0	2.37481e-05	0.000717569	0.00207192	5.50981e-06	0.107542	Bacteria;Bacteroidetes;Flavobacteriia;Flavobacteriales;Flavobacteriaceae;uncultured Bacteroidetes bacterium;uncultured Bacteroidetes bacterium
g_test	sp	New.ReferenceOTU1674	5759.81	0	5	1.90195e-06	1.80841e-06	0.0226384	0.000105871	0	1.8366e-06	0	Bacteria;Aquificae;Aquificae;Aquificales;Desulfurobacteriaceae;Desulfurobacterium
g_test	sp	AB842284.1.1464	5735.22	0	6	1.90195e-06	1.80841e-06	0	0.00100224	0.0212557	0.000112033	0.00141693	Bacteria;Proteobacteria;Gammaproteobacteria;Order Incertae Sedis;Family Incertae Sedis;Marinicella;uncultured bacterium
g_test	sp	FN562914.1.1348	5657.92	0	6	0.000368978	3.61682e-06	0	0.00212918	0.0575291	0.00408645	0.0536019	Bacteria;Bacteroidetes;Cytophagia;Cytophagales;Flammeovirgaceae;uncultured;uncultured bacterium
g_test	sp	New.ReferenceOTU2137	5447.22	0	4	0.0106072	0.000698046	8.20389e-05	4.70537e-06	0	0	0	Unassigned
g_test	sp	GQ349546.1.1352	5354.64	0	7	0.00993008	0.0261406	8.63567e-06	0.000985776	0.000248852	1.8366e-06	0.000434741	Bacteria;Proteobacteria;Epsilonproteobacteria;Campylobacterales;Helicobacteraceae;Sulfurimonas;uncultured epsilon proteobacterium
g_test	sp	AY280410.1.1408	5329.83	0	5	0.011988	0.00278676	6.47675e-06	9.41075e-06	3.6867e-06	0	0	Bacteria;Proteobacteria;Epsilonproteobacteria;Campylobacterales;Campylobacteraceae;Thiofractor;uncultured bacterium
g_test	sp	AB057722.1.1392	5282.98	0	4	5.70585e-06	0	0.0208336	1.64688e-05	5.53005e-06	0	0	Archaea;Euryarchaeota;Methanococci;Methanococcales;Methanococcaceae;uncultured
g_test	sp	New.ReferenceOTU2022	5191	0	5	1.90195e-06	1.80841e-06	8.85156e-05	0.021193	0.00077052	0	0	Bacteria;Actinobacteria;Acidimicrobiia;Acidimicrobiales;uncultured;uncultured bacterium;uncultured bacterium
g_test	sp	JN662083.1.1394	5095.44	0	4	1.90195e-06	0	0.00019862	0.0210824	0.000444247	0	0	Bacteria;Proteobacteria;Gammaproteobacteria;Methylococcales;Marine Methylotrophic Group 2
g_test	sp	New.CleanUp.ReferenceOTU506940	4943.24	0	4	0	0	2.15892e-06	0.00124928	0.0182307	0.00618936	0	Bacteria;Proteobacteria;Gammaproteobacteria;Thiotrichales;Piscirickettsiaceae;endosymbionts;uncultured bacterium
g_test	sp	JQ287480.1.1461	4917.96	0	4	0	0	0	3.29376e-05	0.00907112	9.18302e-06	0.113049	Bacteria;Proteobacteria;Alphaproteobacteria;SB1-18;uncultured bacterium;uncultured bacterium;uncultured bacterium
g_test	sp	New.ReferenceOTU1489	4876.32	0	4	0.00898101	0.000269453	8.63567e-06	0	1.84335e-06	0	0	Bacteria;Proteobacteria;Epsilonproteobacteria;Nautiliales;Nautiliaceae;Nitratifractor
g_test	sp	AY251063.1.1482	4705.02	0	5	0.00910654	0.000311046	0.000287136	2.35269e-06	0	5.50981e-06	0	Bacteria;Proteobacteria;Epsilonproteobacteria;Nautiliales;Nautiliaceae;Nitratifractor;uncultured bacterium
g_test	sp	AY370187.1.1454	4687.78	0	5	0	5.42523e-06	7.988e-05	0	5.53005e-06	0.00402033	1.61015e-05	Bacteria;Proteobacteria;Alphaproteobacteria;Rhizobiales;Brucellaceae
g_test	sp	New.ReferenceOTU1473	4458.75	0	4	0	0	0	7.76387e-05	0.0236354	0.00328752	1.61015e-05	Bacteria;Proteobacteria;Gammaproteobacteria;Xanthomonadales;JTB255 marine benthic group
g_test	sp	JQ287080.1.1521	4456.37	0	4	0.000117921	0	0	0.000185862	0.0250695	0.00367137	0	Bacteria;Proteobacteria;Deltaproteobacteria;Desulfobacterales;Desulfobulbaceae;Desulfobulbus;uncultured bacterium
g_test	sp	New.ReferenceOTU677	4359.3	0	5	0.00987112	0.00217913	6.04497e-05	7.05806e-06	0	7.34642e-06	0	Bacteria;Proteobacteria;Epsilonproteobacteria;Nautiliales;Nautiliaceae;Thioreductor
g_test	sp	AF367495.1.1329	4258.41	0	6	0.00373733	0.0078051	3.67016e-05	0.00611228	0.00929232	3.67321e-06	0	Bacteria;Proteobacteria;Epsilonproteobacteria;Campylobacterales;Helicobacteraceae;Sulfurimonas;uncultured epsilon proteobacterium
g_test	sp	AB476216.1.1305	4164.63	0	4	0	0	0	0.00152219	0.0238198	0.00337568	0.00202879	Bacteria;Proteobacteria;Alphaproteobacteria;Rhizobiales;Phyllobacteriaceae
g_test	sp	EU774572.1.1342	4101.95	0	4	5.70585e-06	0	9.06746e-05	0	1.84335e-06	0.00353914	0	Bacteria;Cyanobacteria;Chloroplast
g_test	sp	AX039566.8.1529	4022.43	0	5	0	1.80841e-06	6.69265e-05	0	7.37339e-06	0.00344914	1.61015e-05	Bacteria;Proteobacteria;Gammaproteobacteria;Enterobacteriales;Enterobacteriaceae;Escherichia-Shigella
g_test	sp	AF332514.1.1497	4000.7	0	4	9.50975e-06	0.00878164	0.00535196	2.35269e-05	0	0	0	Bacteria;Thermodesulfobacteria;Thermodesulfobacteria;Thermodesulfobacteriales;Thermodesulfobacteriaceae;Caldimicrobium
g_test	sp	FN562824.1.1388	3964.49	0	4	0	0	0	0.000103518	0.013427	3.67321e-06	8.05075e-05	Bacteria;Proteobacteria;Gammaproteobacteria;Order Incertae Sedis;Family Incertae Sedis;Marinicella;uncultured gamma proteobacterium
g_test	sp	New.ReferenceOTU1008	3959.33	0	5	0.000131235	2.71261e-05	0	0.00281617	0.0120186	1.8366e-06	0	Bacteria;Proteobacteria;Gammaproteobacteria;Order Incertae Sedis;Family Incertae Sedis;Marinicella;uncultured bacterium
g_test	sp	New.ReferenceOTU911	3888.34	0	5	0.006925	9.04205e-06	4.31784e-06	2.35269e-06	6.63605e-05	0	0	Bacteria;Proteobacteria;Deltaproteobacteria;Desulfobacterales;Desulfobulbaceae;Desulfobulbus;uncultured delta proteobacterium
g_test	sp	New.ReferenceOTU1912	3819.03	0	7	1.14117e-05	9.04205e-06	2.15892e-06	0.00331494	0.0115449	7.34642e-06	0.00146524	Bacteria;Proteobacteria;Alphaproteobacteria;Rhodobacterales;Rhodobacteraceae
g_test	sp	DQ395426.1.1417	3581.86	0	4	0	0	0	0.000112929	0.0123762	1.8366e-06	0.000386436	Bacteria;Proteobacteria;Alphaproteobacteria;Caulobacterales;Hyphomonadaceae;uncultured
g_test	sp	New.ReferenceOTU2355	3573.37	0	4	0	0	0	1.41161e-05	0.00204796	0.00395237	8.05075e-05	Bacteria;Bacteroidetes;Sphingobacteriia;Sphingobacteriales;Saprospiraceae;Lewinella;uncultured bacterium
g_test	sp	AF449223.1.1378	3567.2	0	5	6.08624e-05	3.61682e-06	0	0.0141938	0.00137698	0	4.83045e-05	Bacteria;Proteobacteria;Alphaproteobacteria;Rhodobacterales;Rhodobacteraceae;Roseobacter clade NAC11-7 lineage;uncultured alpha proteobacterium
g_test	sp	New.ReferenceOTU1045	3530.35	0	5	5.32546e-05	0	0	0.00112458	0.0138528	1.8366e-06	0.0053135	Bacteria;Bacteroidetes;Flavobacteriia;Flavobacteriales;Flavobacteriaceae;uncultured;uncultured Bacteroidetes bacterium
g_test	sp	JX527407.1.1423	3516.56	0	6	1.90195e-06	1.80841e-06	0.00019862	0.0140385	0.000683882	0	1.61015e-05	Bacteria;Bacteroidetes;Flavobacteriia;Flavobacteriales;Flavobacteriaceae;uncultured
g_test	sp	JQ712381.1.1383	3482.94	0	6	0.00947362	0.00217009	0.000129535	0.00549588	0.00547106	5.50981e-06	0	Bacteria;Proteobacteria;Epsilonproteobacteria;Campylobacterales;Helicobacteraceae;Sulfurimonas;uncultured epsilon proteobacterium
g_test	sp	New.ReferenceOTU1840	3402.14	0	6	1.90195e-06	0	0.000174872	0.00725333	0.00568673	1.8366e-06	1.61015e-05	Bacteria;Proteobacteria;Gammaproteobacteria;Methylococcales
g_test	sp	FR852993.1.1458	3381.92	0	6	0.00772002	0.00158055	0.000200779	2.58796e-05	3.6867e-06	9.18302e-06	0	Bacteria;Proteobacteria;Epsilonproteobacteria;Campylobacterales;Helicobacteraceae;Sulfurovum
g_test	sp	DQ832646.1.1381	3308.75	0	7	0.00138652	1.26589e-05	0.000213733	0.0189462	0.0186086	0.00386054	0.0100312	Bacteria;Proteobacteria;Alphaproteobacteria;Rhodobacterales;Rhodobacteraceae;uncultured;uncultured bacterium
g_test	sp	New.ReferenceOTU979	3203.56	0	5	3.8039e-06	0	8.20389e-05	0.00523943	0.00666739	0	3.2203e-05	Bacteria;Proteobacteria;Gammaproteobacteria;Thiotrichales;Piscirickettsiaceae;Marine Methylotrophic Group 3;uncultured gamma proteobacterium
g_test	sp	GQ433956.1.1444	3161.44	0	5	0.00581046	3.61682e-06	2.15892e-06	9.41075e-06	0.000162215	0	0	Bacteria;Bacteroidetes;VC2,1 Bac22;uncultured bacterium;uncultured bacterium;uncultured bacterium;uncultured bacterium
g_test	sp	GU220765.1.1464	3155.82	0	5	0	1.80841e-06	0	4.70537e-05	0.00165348	5.50981e-06	0.0607349	Bacteria;Proteobacteria;Alphaproteobacteria;OCS116 clade;uncultured bacterium;uncultured bacterium;uncultured bacterium
g_test	sp	FN554145.1.1470	3110.79	0	6	0.00591697	3.9785e-05	0.000114423	0.000176451	2.58069e-05	1.8366e-06	0	Bacteria;Proteobacteria;Epsilonproteobacteria;Campylobacterales;Helicobacteraceae;Sulfurovum
g_test	sp	New.ReferenceOTU2439	3078.77	0	5	0.00833054	8.68037e-05	0.00712875	3.7643e-05	5.53005e-06	0	0	Bacteria;Bacteroidetes;Flavobacteriia;Flavobacteriales;R103-B20;uncultured bacterium;uncultured bacterium
g_test	sp	New.ReferenceOTU1032	2985.86	0	5	0	0	0.000138171	0.000766976	0.0135652	1.8366e-06	0.0127363	Bacteria;Bacteroidetes;Flavobacteriia;Flavobacteriales;Flavobacteriaceae
g_test	sp	New.ReferenceOTU1185	2982.66	0	4	3.8039e-06	0	0	0.000291733	0.00518534	0.0038734	0	Bacteria;Bacteroidetes;BD2-2;uncultured bacterium;uncultured bacterium;uncultured bacterium;uncultured bacterium
g_test	sp	CP001857.1049930.1051439	2957.54	0	5	1.90195e-06	0.00236359	0.00879759	2.35269e-05	1.65901e-05	0	0	Archaea;Euryarchaeota;Archaeoglobi;Archaeoglobales;Archaeoglobaceae;Archaeoglobus
g_test	sp	FR853025.1.1494	2930.04	0	5	0.00800721	0.000256794	0.00759507	7.05806e-06	1.84335e-06	0	0	Bacteria;Deinococcus-Thermus;Deinococci;Thermales;Thermaceae;Oceanithermus;uncultured bacterium
g_test	sp	New.ReferenceOTU1543	2914.24	0	4	0	0	0	2.35269e-05	0.00983979	1.8366e-06	1.61015e-05	Bacteria;Proteobacteria;Gammaproteobacteria;Methylococcales;Marine Methylotrophic Group 2
g_test	sp	AB476212.1.1464	2880.02	0	4	0	0	0	8.46967e-05	0.00362218	9.18302e-06	0.0635043	Bacteria;Planctomycetes;Planctomycetacia;Planctomycetales;Planctomycetaceae;Bythopirellula;uncultured bacterium
g_test	sp	KC682271.1.1447	2834.25	0	5	0.000121725	1.80841e-06	0.000105787	0.0093284	0.00290696	0	0	Bacteria;Proteobacteria;Alphaproteobacteria;Rhodobacterales;Rhodobacteraceae;Roseobacter clade NAC11-7 lineage;uncultured alpha proteobacterium
g_test	sp	EU772607.1.1332	2803.94	0	5	1.90195e-06	0	3.45427e-05	0	1.84335e-06	0.00239677	1.61015e-05	Bacteria;Proteobacteria;Gammaproteobacteria;Enterobacteriales;Enterobacteriaceae;Enterobacter;uncultured bacterium
g_test	sp	New.ReferenceOTU37	2697.61	0	6	5.70585e-06	0	0.000155442	0.0114764	9.95408e-05	1.8366e-06	4.83045e-05	Bacteria;Proteobacteria;Gammaproteobacteria;Thiotrichales;Thiotrichaceae;uncultured;uncultured bacterium
g_test	sp	New.ReferenceOTU1738	2685.21	0	5	0.00630306	0.00126046	0.000630404	2.35269e-06	0	3.67321e-06	0	Bacteria;Proteobacteria;Epsilonproteobacteria;Nautiliales;Nautiliaceae;Thioreductor
g_test	sp	New.ReferenceOTU672	2505.63	0	4	1.90195e-06	1.80841e-06	0.00987273	9.41075e-06	0	0	0	Bacteria;Thermodesulfobacteria;Thermodesulfobacteria;Thermodesulfobacteriales;Thermodesulfobacteriaceae;uncultured Thermodesulfobacteriaceae bacterium;uncultured Thermodesulfobacteriaceae bacterium
g_test	sp	AB440165.1.1431	2493.35	0	6	0.000102705	2.89346e-05	4.31784e-06	0.00663458	0.00405168	0	0.000434741	Bacteria;Proteobacteria;Epsilonproteobacteria;Campylobacterales;Helicobacteraceae;Sulfurovum;uncultured bacterium
g_test	sp	KC682834.1.1417	2459.96	0	4	0	0	4.31784e-06	0.00110106	0.00869876	0	0.0021737	Bacteria;Proteobacteria;Alphaproteobacteria;Caulobacterales;Hyphomonadaceae;Robiginitomaculum;uncultured bacterium
g_test	sp	New.ReferenceOTU1253	2456.98	0	5	3.8039e-06	3.0743e-05	0.00972593	9.41075e-06	0	1.8366e-06	0	Bacteria;Proteobacteria;Deltaproteobacteria;Desulfovibrionales;Desulfohalobiaceae;Desulfothermus
g_test	sp	DQ395479.1.1517	2383.16	0	4	0	0	0	1.88215e-05	0.000105071	0.002248	0.000676263	Bacteria;Proteobacteria;Alphaproteobacteria;Rickettsiales;Rickettsiaceae;Rickettsia
g_test	sp	GQ452887.1.1498	2374.11	0	5	0	1.80841e-06	0	0.000336434	0.00393924	0.00354832	0.00193218	Bacteria;Verrucomicrobia;Verrucomicrobiae;Verrucomicrobiales;DEV007;uncultured bacterium;uncultured bacterium
g_test	sp	New.ReferenceOTU105	2342.96	0	5	3.8039e-06	3.61682e-06	0.00920779	5.88172e-05	1.84335e-06	0	0	Bacteria;Proteobacteria;Epsilonproteobacteria;Campylobacterales;Helicobacteraceae;Sulfurovum;uncultured bacterium
g_test	sp	New.ReferenceOTU544	2337.58	0	4	0.000523036	0.00958276	2.15892e-06	0.000174099	0	0	0	Bacteria;Proteobacteria;Epsilonproteobacteria;Campylobacterales;Helicobacteraceae;Sulfurimonas;uncultured bacterium
g_test	sp	AB238959.1.1410	2251.3	0	4	0	0	4.10194e-05	0.00171981	0.00622314	1.8366e-06	0	Bacteria;Proteobacteria;Gammaproteobacteria;BD7-8 marine group
g_test	sp	New.ReferenceOTU1938	2229.99	0	5	1.90195e-06	3.61682e-06	0.00874578	4.23484e-05	9.21674e-06	0	0	Bacteria;Aquificae;Aquificae;Aquificales;Desulfurobacteriaceae;Desulfurobacterium
g_test	sp	New.ReferenceOTU1053	2227.38	0	5	0	3.61682e-06	0	0.000256443	0.0134601	0.00367505	0.00449232	Bacteria;Proteobacteria;Gammaproteobacteria;Chromatiales;Ectothiorhodospiraceae;Acidiferrobacter;uncultured bacterium
g_test	sp	JX310176.1.1425	2225.3	0	4	0	0	0	1.17634e-05	2.94936e-05	1.8366e-06	0.033636	Bacteria;Proteobacteria;Alphaproteobacteria;Rhodobacterales;Rhodobacteraceae
g_test	sp	FJ937713.1.1224	2201.36	0	5	1.90195e-06	0	0.000123058	0.007091	0.00177699	0	1.61015e-05	Bacteria;Proteobacteria;Gammaproteobacteria;Methylococcales;Marine Methylotrophic Group 2;uncultured bacterium;uncultured bacterium
g_test	sp	DQ071079.1.1438	2177.37	0	6	0.000941466	0.00750128	0	0.00308908	0.000200925	3.67321e-06	0.000144914	Bacteria;Proteobacteria;Epsilonproteobacteria;Campylobacterales;Helicobacteraceae;Sulfurimonas;uncultured bacterium
g_test	sp	AB181499.1.1451	2165.19	0	6	0.00123437	9.04205e-05	7.988e-05	0.00619933	0.00583973	1.46928e-05	0	Bacteria;Proteobacteria;Epsilonproteobacteria;Campylobacterales;Helicobacteraceae;Sulfurimonas;uncultured bacterium
g_test	sp	New.ReferenceOTU2005	2134.78	0	4	0	0	0	0.00942957	5.53005e-05	1.8366e-06	0.000225421	Bacteria;Bacteroidetes;Flavobacteriia;Flavobacteriales;Flavobacteriaceae;Tenacibaculum
g_test	sp	New.ReferenceOTU1662	2110.85	0	4	1.90195e-06	1.80841e-06	0.00829456	3.7643e-05	0	0	0	Unassigned
g_test	sp	AB476180.1.1417	2096.37	0	5	3.8039e-06	0	0	0.000265854	0.0101974	1.8366e-06	0.0374682	Bacteria;Proteobacteria;Alphaproteobacteria;OCS116 clade;uncultured bacterium;uncultured bacterium;uncultured bacterium
g_test	sp	New.ReferenceOTU1525	2072.23	0	5	0	0	3.88605e-05	0.00172687	0.00869876	0.00217087	1.61015e-05	Bacteria;Bacteroidetes;Cytophagia;Cytophagales;Flammeovirgaceae
g_test	sp	GQ903355.1.1494	2068.57	0	4	1.90195e-06	0	9.06746e-05	0.00223976	0.00513926	0	0	Bacteria;Proteobacteria;Gammaproteobacteria;Thiotrichales;Piscirickettsiaceae;endosymbionts;uncultured bacterium
g_test	sp	New.ReferenceOTU1138	2067.84	0	5	0	0	7.55621e-05	0.00128457	0.00963334	0.00191558	4.83045e-05	Bacteria;Proteobacteria;Gammaproteobacteria;Chromatiales;Ectothiorhodospiraceae;Acidiferrobacter;uncultured bacterium
g_test	sp	AB293244.1.1335	2030.69	0	4	0	0.00205074	0.00558728	4.70537e-06	0	1.8366e-06	0	Archaea;Crenarchaeota;Thermoprotei;Thermoproteales;Thermoproteaceae;uncultured;uncultured archaeon
g_test	sp	FM165250.1.1493	2028.11	0	4	0	0	4.31784e-06	0.000348198	0.00720934	0	0.000933887	Bacteria;Bacteroidetes;Flavobacteriia;Flavobacteriales;Flavobacteriaceae;Lutibacter
g_test	sp	HQ153930.1.1376	1991.16	0	4	1.90195e-06	0	2.15892e-06	0.00682985	0.00135855	0	0	Bacteria;Proteobacteria;Alphaproteobacteria;Rhizobiales
g_test	sp	EU050874.1.1386	1985	0	4	0	0	0	2.35269e-06	0.00102859	1.8366e-06	0.0378707	Bacteria;Planctomycetes;Phycisphaerae;Phycisphaerales;Phycisphaeraceae;Phycisphaera;uncultured bacterium
g_test	sp	New.ReferenceOTU2268	1981.63	0	5	0.00532927	0.000815593	2.15892e-06	0.00273147	0.00077605	0	0	Bacteria;Proteobacteria;Gammaproteobacteria;Thiotrichales;Piscirickettsiaceae;Thiomicrospira;uncultured bacterium
g_test	sp	FJ497575.1.1344	1948.98	0	4	0	0	0	3.05849e-05	3.6867e-06	5.50981e-06	0.0296751	Bacteria;Proteobacteria;Alphaproteobacteria;Rhodobacterales;Rhodobacteraceae;Pacificibacter;uncultured alpha proteobacterium
g_test	sp	New.ReferenceOTU2432	1936.71	0	4	9.50975e-06	0.000457528	0.00718056	0	3.6867e-06	0	0	Bacteria;Proteobacteria;Epsilonproteobacteria;Nautiliales;Nautiliaceae;Nautilia
g_test	sp	JF320726.1.1466	1895.16	0	5	3.8039e-06	0	0	0.000715217	0.00811811	1.8366e-06	0.00592535	Bacteria;Proteobacteria;Gammaproteobacteria;Order Incertae Sedis;Family Incertae Sedis;Marinicella;uncultured bacterium
g_test	sp	New.ReferenceOTU331	1890.76	0	4	3.8039e-06	0	7.988e-05	0.00797796	7.55773e-05	0	0	Bacteria;Bacteroidetes;Flavobacteriia;Flavobacteriales;Flavobacteriaceae;Lutibacter
g_test	sp	JQ287071.1.1470	1870.73	0	7	0.000880603	0.000963882	0.000103628	0.00996833	5.53005e-06	1.8366e-06	4.83045e-05	Bacteria;Proteobacteria;Epsilonproteobacteria;Campylobacterales;Helicobacteraceae;Sulfurovum;uncultured epsilon proteobacterium
g_test	sp	EU491713.1.1444	1866.53	0	4	0	0	0	3.05849e-05	0.00999464	0.000830145	0.000225421	Bacteria;Bacteroidetes;Flavobacteriia;Flavobacteriales;Flavobacteriaceae;Maritimimonas
g_test	sp	New.ReferenceOTU1257	1859.82	0	5	1.90195e-06	0	0.000196462	0.00631226	0.00132721	9.18302e-06	0	Bacteria;Proteobacteria;Gammaproteobacteria;Methylococcales;IheB2-23;uncultured bacterium;uncultured bacterium
g_test	sp	JN662165.1.1232	1821.83	0	5	0.00385525	0.000421359	0.000110105	0	1.84335e-06	5.50981e-06	0	Bacteria;Proteobacteria;Epsilonproteobacteria;Campylobacterales;Helicobacteraceae;Sulfurovum;uncultured epsilon proteobacterium
g_test	sp	HQ807406.1.1453	1760.31	0	4	0	0	1.29535e-05	0	5.53005e-06	0.00150051	1.61015e-05	Bacteria;Proteobacteria;Gammaproteobacteria;Enterobacteriales;Enterobacteriaceae;Escherichia-Shigella
g_test	sp	JQ287290.1.1486	1750.74	0	6	3.8039e-06	1.80841e-06	0	0.000291733	0.00532359	3.67321e-06	0.0409783	Bacteria;Bacteroidetes;Flavobacteriia;Flavobacteriales;Flavobacteriaceae
g_test	sp	JQ287017.1.1510	1724.75	0	4	0	0	0	0.000559939	0.00682039	1.8366e-06	0.0369207	Bacteria;Verrucomicrobia;Verrucomicrobiae;Verrucomicrobiales;DEV007;uncultured bacterium;uncultured bacterium
g_test	sp	New.ReferenceOTU2365	1714.74	0	4	1.52156e-05	9.04205e-06	0.00689558	2.35269e-06	0	0	0	Bacteria;Proteobacteria;Epsilonproteobacteria;Nautiliales;Nautiliaceae;Nitratifractor;uncultured bacterium
g_test	sp	FN554151.1.1500	1670.36	0	4	0	0	0	2.35269e-06	5.89872e-05	1.8366e-06	0.0257785	Bacteria;Proteobacteria;Gammaproteobacteria;Thiotrichales;Thiotrichaceae;uncultured;uncultured sediment bacterium
g_test	sp	GU061224.1.1423	1645.91	0	6	0.000100803	1.98925e-05	3.23838e-05	0.0036302	0.00327379	0	8.05075e-05	Bacteria;Bacteroidetes;Flavobacteriia;Flavobacteriales;Cryomorphaceae;Fluviicola;uncultured bacterium
g_test	sp	New.ReferenceOTU2264	1581.46	0	5	0.00365175	0.000495504	0.000535412	4.70537e-06	0	1.8366e-06	0	Bacteria;Proteobacteria;Epsilonproteobacteria;Nautiliales;Nautiliaceae;Caminibacter
g_test	sp	New.ReferenceOTU2098	1577.98	0	4	0.00330179	0.00012478	0.000408035	2.35269e-06	0	0	0	Bacteria;Proteobacteria;Epsilonproteobacteria;Nautiliales;Nautiliaceae;Caminibacter;uncultured bacterium
g_test	sp	AJ431251.1.1522	1569.81	0	4	0.00336265	8.13784e-05	0.00057859	2.35269e-06	0	0	0	Bacteria;Firmicutes;Clostridia;Thermoanaerobacterales;Thermodesulfobiaceae;Coprothermobacter
g_test	sp	New.ReferenceOTU1042	1550.32	0	4	1.90195e-06	0	8.63567e-06	0.00644166	0.000176961	0	0	Bacteria;Proteobacteria;Deltaproteobacteria;Desulfobacterales;Desulfobulbaceae;MSBL7
g_test	sp	AF449251.1.1429	1528.59	0	6	0.00286814	1.08505e-05	2.15892e-06	8.70494e-05	3.6867e-06	5.50981e-06	0	Bacteria;Proteobacteria;Epsilonproteobacteria;Campylobacterales;Helicobacteraceae;Sulfurovum
g_test	sp	FJ792087.1.1341	1520.02	0	4	0.00417098	0.00405626	0	7.05806e-05	1.10601e-05	0	0	Bacteria;BD1-5;uncultured bacterium;uncultured bacterium;uncultured bacterium;uncultured bacterium;uncultured bacterium
g_test	sp	KC682597.1.1256	1503.17	0	6	1.52156e-05	7.23364e-06	0	0.000985776	0.00446275	1.8366e-06	1.61015e-05	Bacteria;Proteobacteria;Alphaproteobacteria;Rhodobacterales;Rhodobacteraceae
g_test	sp	FJ640814.1.1486	1496.37	0	4	0	0	0	3.05849e-05	0.00567751	0.00444458	0.0191125	Bacteria;Bacteroidetes;Cytophagia;Cytophagales;Flammeovirgaceae;Reichenbachiella;uncultured Bacteroidetes bacterium
g_test	sp	New.ReferenceOTU1608	1468.47	0	4	0	0	0	3.29376e-05	0.00565171	1.8366e-06	0.001111	Bacteria;Proteobacteria;Alphaproteobacteria;DB1-14;uncultured bacterium;uncultured bacterium;uncultured bacterium
g_test	sp	DQ270646.1.1488	1409.32	0	4	0	0	0	0.000348198	0.00458072	3.67321e-06	3.2203e-05	Bacteria;Proteobacteria;Alphaproteobacteria;Rhizobiales;Phyllobacteriaceae;Pseudahrensia;uncultured bacterium
g_test	sp	New.ReferenceOTU234	1369.56	0	5	3.8039e-06	1.80841e-06	0.00538218	5.41118e-05	3.6867e-06	0	0	Bacteria;Proteobacteria;Epsilonproteobacteria;Campylobacterales;Helicobacteraceae;Sulfurovum;uncultured bacterium
g_test	sp	JN662133.1.1359	1358.27	0	6	0.00291759	0.000311046	2.5907e-05	0.000119987	4.42404e-05	1.8366e-06	0	Bacteria;Proteobacteria;Epsilonproteobacteria;Campylobacterales;Helicobacteraceae;Sulfurovum;uncultured bacterium
g_test	sp	AB476274.1.1400	1348.86	0	4	0	0	0.000168396	0.00515003	0.000376043	0	1.61015e-05	Bacteria;Proteobacteria;Alphaproteobacteria;Caulobacterales;Hyphomonadaceae;Robiginitomaculum;uncultured bacterium
g_test	sp	New.ReferenceOTU2142	1332.54	0	4	0.00261328	0.000179033	4.31784e-06	0	0	1.8366e-06	0	Bacteria;Proteobacteria;Epsilonproteobacteria;Nautiliales;Nautiliaceae;Thioreductor
g_test	sp	HQ153847.1.1358	1330.31	0	5	1.52156e-05	9.04205e-06	0.0054599	9.41075e-06	0	3.67321e-06	0	Bacteria;Proteobacteria;Epsilonproteobacteria;Campylobacterales;Helicobacteraceae;Sulfurovum;uncultured bacterium
g_test	sp	New.CleanUp.ReferenceOTU427269	1302.2	0	4	1.90195e-06	0	6.90854e-05	0.0053406	0.000154841	0	0	Bacteria;Bacteroidetes;Flavobacteriia;Flavobacteriales;Flavobacteriaceae;Lutibacter;uncultured bacterium
g_test	sp	JN873958.1.1467	1236.16	0	6	0.000182587	0.000106696	6.26086e-05	0.00443952	0.00137145	0	8.05075e-05	Bacteria;Proteobacteria;Epsilonproteobacteria;Campylobacterales;Helicobacteraceae;Sulfurovum;uncultured bacterium
g_test	sp	New.ReferenceOTU1966	1226.06	0	4	0.00220246	0	2.80659e-05	2.35269e-06	9.21674e-06	0	0	Bacteria;Bacteroidetes;VC2,1 Bac22
g_test	sp	New.ReferenceOTU1380	1216.57	0	4	0.0028282	0.000781233	2.37481e-05	2.35269e-06	0	0	0	Bacteria;Proteobacteria;Epsilonproteobacteria;Campylobacterales;Helicobacteraceae;Sulfurovum
g_test	sp	New.ReferenceOTU1672	1205.12	0	4	0	0	2.80659e-05	0.0022727	0.002424	0	0.000193218	Bacteria;Proteobacteria;Alphaproteobacteria;Rhizobiales;Hyphomicrobiaceae;Filomicrobium;uncultured bacterium
g_test	sp	New.ReferenceOTU2002	1201.56	0	4	0	0	0	0.000223505	0.00616416	0.00103585	3.2203e-05	Bacteria;Proteobacteria;Gammaproteobacteria;Order Incertae Sedis;Family Incertae Sedis;Marinicella;uncultured bacterium
g_test	sp	New.ReferenceOTU2518	1185.71	0	5	1.90195e-06	0	0	4.94064e-05	0.00481114	7.53008e-05	9.6609e-05	Bacteria;Proteobacteria;Gammaproteobacteria;Order Incertae Sedis;Family Incertae Sedis;Marinicella
g_test	sp	JN662191.1.1362	1152.76	0	6	0.0022424	8.86121e-05	7.34032e-05	1.17634e-05	3.6867e-06	0	3.2203e-05	Bacteria;Proteobacteria;Epsilonproteobacteria;Campylobacterales;Helicobacteraceae;Sulfurovum;uncultured bacterium
g_test	sp	FJ205286.1.1488	1147.62	0	4	0	3.61682e-06	0	0	1.84335e-06	1.8366e-06	0.0171642	Bacteria;Proteobacteria;Gammaproteobacteria;Thiotrichales;Thiotrichaceae;uncultured
g_test	sp	JN662115.1.1362	1143.58	0	4	1.52156e-05	0	0	0.000159983	0.00387103	0	3.2203e-05	Bacteria;Proteobacteria;Epsilonproteobacteria;Campylobacterales;Helicobacteraceae;Sulfurovum;uncultured bacterium
g_test	sp	New.CleanUp.ReferenceOTU474543	1124.62	0	5	0.00206362	3.43598e-05	2.15892e-06	1.41161e-05	1.10601e-05	0	0	Bacteria;Proteobacteria;Epsilonproteobacteria;Campylobacterales;Helicobacteraceae;Sulfurovum;uncultured bacterium
g_test	sp	JN662174.1.1366	1119.6	0	4	6.84702e-05	0	0.00482302	3.29376e-05	2.39635e-05	0	0	Bacteria;Proteobacteria;Epsilonproteobacteria;Campylobacterales;Helicobacteraceae;Sulfurovum;uncultured bacterium
g_test	sp	EF687341.1.1355	1115.26	0	6	0.000601016	0.000220626	1.29535e-05	0.00552881	0.000855314	1.8366e-06	0	Bacteria;Proteobacteria;Epsilonproteobacteria;Campylobacterales;Helicobacteraceae;Sulfurimonas;uncultured sediment bacterium
g_test	sp	HM185888.1.1371	1114.6	0	4	0	1.80841e-06	1.72713e-05	0	0	0.000958708	1.61015e-05	Bacteria;Proteobacteria;Gammaproteobacteria;Enterobacteriales;Enterobacteriaceae
g_test	sp	AY263403.1.1472	1111.73	0	5	0.0027274	0.00202361	0.00330746	7.05806e-05	0	1.8366e-06	0	Bacteria;Aquificae;Aquificae;Aquificales;Desulfurobacteriaceae;Thermovibrio
g_test	sp	JQ287046.1.1504	1088.77	0	5	0	1.80841e-06	4.10194e-05	0.000487006	0.00328116	1.8366e-06	0	Bacteria;Proteobacteria;Gammaproteobacteria;Thiotrichales;Thiotrichaceae;uncultured;uncultured bacterium
g_test	sp	AY251060.1.1475	1076.03	0	5	0.00295373	0.0016764	0.00123058	2.82322e-05	3.6867e-06	0	0	Bacteria;Proteobacteria;Epsilonproteobacteria;Campylobacterales;Campylobacteraceae;Thiofractor;uncultured bacterium
g_test	sp	JQ287230.1.1441	1061.46	0	4	0	0	3.02249e-05	0.00314554	0.00132537	0	0.000305929	Bacteria;Proteobacteria;Alphaproteobacteria;Caulobacterales;Hyphomonadaceae;Robiginitomaculum;uncultured bacterium
g_test	sp	GU061084.1.1385	1054.08	0	4	2.09215e-05	1.44673e-05	0	0.000141161	0.00357978	0	0	Bacteria;Proteobacteria;Alphaproteobacteria;Rhodobacterales;Rhodobacteraceae
g_test	sp	FJ628316.1.1523	1041.85	0	4	1.33137e-05	0	2.15892e-06	0.00404192	0.00044609	0	0	Bacteria;Proteobacteria;Deltaproteobacteria;Desulfobacterales;Desulfobulbaceae;Desulfocapsa;uncultured delta proteobacterium
g_test	sp	AY531558.1.1384	1026.46	0	6	0.00236222	7.0528e-05	7.988e-05	0.000531707	4.05537e-05	1.8366e-06	0	Bacteria;Bacteroidetes;Flavobacteriia;Flavobacteriales;Flavobacteriaceae;Maritimimonas
g_test	sp	New.ReferenceOTU929	1025.16	0	5	0.00186772	1.44673e-05	0	7.05806e-06	2.58069e-05	0	1.61015e-05	Bacteria;Bacteroidetes;VC2,1 Bac22;uncultured bacterium;uncultured bacterium;uncultured bacterium;uncultured bacterium
g_test	sp	FR744471.1.1447	1022.54	0	5	4.37449e-05	1.80841e-06	0	0.000329376	0.00361849	0	0.000305929	Bacteria;Bacteroidetes;Flavobacteriia;Flavobacteriales;Flavobacteriaceae;uncultured
g_test	sp	EF441900.1.1412	1016	0	7	0.000958583	0.000372532	8.63567e-05	0.00547705	0.000774206	9.18302e-06	1.61015e-05	Bacteria;Proteobacteria;Epsilonproteobacteria;Campylobacterales;Helicobacteraceae;Sulfurimonas
g_test	sp	New.ReferenceOTU1287	1013.62	0	5	0.0027312	0.000717939	0.00312611	9.41075e-06	2.76502e-05	0	0	Bacteria;BD1-5
g_test	sp	CP002205.2120484.2121990	999.702	0	6	0.00220816	0.00463315	2.15892e-06	2.82322e-05	1.10601e-05	0	0.000128812	Bacteria;Proteobacteria;Epsilonproteobacteria;Campylobacterales;Helicobacteraceae;Sulfurimonas
g_test	sp	HQ588379.1.1373	993.413	0	5	8.17839e-05	5.42523e-06	0.00410842	0.000261148	6.63605e-05	0	0	Bacteria;Proteobacteria;Epsilonproteobacteria;Campylobacterales;Helicobacteraceae;Sulfurovum;uncultured bacterium
g_test	sp	FJ905673.1.1406	985.882	0	4	0	0	2.15892e-05	0.00339963	0.00198897	0.00106523	0	Bacteria;Proteobacteria;Zetaproteobacteria;Mariprofundales;Mariprofundaceae;Mariprofundus;uncultured bacterium
g_test	sp	AB476192.1.1399	982.836	0	4	0	0	1.94303e-05	0.000298791	0.00323508	0	0.00020932	Bacteria;Proteobacteria;Alphaproteobacteria;Caulobacterales;Hyphomonadaceae;Robiginitomaculum;uncultured bacterium
g_test	sp	New.ReferenceOTU1347	978.114	0	4	0.00266653	0.00125684	0.00102117	2.35269e-06	0	0	0	Bacteria;Caldiserica;Caldisericia;Caldisericales;Caldisericaceae;Caldisericum
g_test	sp	AB842279.1.1433	973.514	0	7	2.28234e-05	1.98925e-05	9.93102e-05	0.00403486	0.000289406	5.50981e-06	1.61015e-05	Bacteria;Proteobacteria;Epsilonproteobacteria;Campylobacterales;Helicobacteraceae;Sulfurovum;uncultured Sulfurovum sp,
g_test	sp	CP001899.1403988.1405498	963.036	0	4	1.90195e-06	0.000745065	0.00292317	0	3.6867e-06	0	0	Archaea;Euryarchaeota;Archaeoglobi;Archaeoglobales;Archaeoglobaceae;Archaeoglobus
g_test	sp	New.ReferenceOTU2231	955.466	0	5	4.75488e-05	0	2.5907e-05	0.00303967	0.00244981	0.000202027	0	Bacteria;Bacteroidetes;Flavobacteriia;Flavobacteriales;Flavobacteriaceae;uncultured
g_test	sp	AY531606.1.1440	951.244	0	6	1.90195e-06	0	0.000431784	0.0002188	0.00273737	1.8366e-06	1.61015e-05	Bacteria;Proteobacteria;Epsilonproteobacteria;Campylobacterales;Campylobacteraceae;Campylobacter;uncultured bacterium
g_test	sp	FM165259.1.1482	950.734	0	5	8.55878e-05	0.000137439	0.00113559	0.0030632	0.000140094	0	0	Bacteria;Proteobacteria;Epsilonproteobacteria;Campylobacterales;Helicobacteraceae;Sulfurovum;uncultured bacterium
g_test	sp	New.ReferenceOTU761	948.022	0	5	1.14117e-05	1.80841e-06	0.000183508	0.00243738	0.00121661	0	0	Bacteria;Bacteroidetes;Flavobacteriia;Flavobacteriales;Flavobacteriaceae;uncultured Bacteroidetes bacterium;uncultured Bacteroidetes bacterium
g_test	sp	EU050875.1.1358	938.481	0	4	0	0	0	0.000425836	0.00425076	1.8366e-06	0.00436351	Bacteria;Planctomycetes;Phycisphaerae;Phycisphaerales;Phycisphaeraceae;SM1A02;uncultured bacterium
g_test	sp	New.ReferenceOTU782	931.189	0	4	0.00196662	0.000245944	6.04497e-05	2.35269e-06	0	0	0	Bacteria;Proteobacteria;Epsilonproteobacteria;Campylobacterales;Helicobacteraceae;Sulfurovum
g_test	sp	JQ287110.1.1470	890.222	0	6	0.00240977	0.000924097	1.72713e-05	0.000771681	1.84335e-05	1.8366e-06	0	Bacteria;Proteobacteria;Epsilonproteobacteria;Campylobacterales;Helicobacteraceae;Sulfurovum;uncultured bacterium
g_test	sp	New.CleanUp.ReferenceOTU572128	884.169	0	4	0.00202938	0	0.000343268	0.000108224	0.000165901	0	0	Bacteria;Proteobacteria;Deltaproteobacteria;Desulfobacterales;Desulfobulbaceae;Desulfobulbus;uncultured bacterium
g_test	sp	New.ReferenceOTU1933	882.371	0	4	0	0.00199829	0.00107082	7.05806e-06	9.21674e-06	0	0	Bacteria;Aquificae;Aquificae;Aquificales;Desulfurobacteriaceae;Desulfurobacterium
g_test	sp	AB095133.1.1040	867.855	0	4	0	0.00124961	0.00196246	9.41075e-06	0	1.8366e-06	0	Archaea;Euryarchaeota;Halobacteria;Halobacteriales;Miscellaneous Euryarchaeotic Group(MEG);uncultured archaeon;uncultured archaeon
g_test	sp	New.ReferenceOTU1676	860.901	0	5	0.000102705	0	3.45427e-05	0.00242797	0.00297701	0.000238759	0	Bacteria;Bacteroidetes;Flavobacteriia;Flavobacteriales;Flavobacteriaceae;uncultured;uncultured bacterium
g_test	sp	New.ReferenceOTU2322	849.745	0	4	0	0	0	2.35269e-06	0.000127191	1.8366e-06	0.0142659	Bacteria;Proteobacteria;Gammaproteobacteria;Chromatiales;Ectothiorhodospiraceae;Acidiferrobacter;uncultured bacterium
g_test	sp	AY268936.1.1506	843.212	0	5	1.90195e-06	9.94625e-05	0.00327076	2.35269e-06	0	1.8366e-06	0	Bacteria;Aquificae;Aquificae;Aquificales;Desulfurobacteriaceae
g_test	sp	New.ReferenceOTU2124	840.444	0	5	0.000346155	3.61682e-06	1.07946e-05	0.00161865	0.00260465	0	0	Bacteria;Bacteroidetes;Flavobacteriia;Flavobacteriales;Flavobacteriaceae;uncultured
g_test	sp	JN232988.1.1444	839.511	0	6	2.28234e-05	1.80841e-06	0	0.00162806	0.00311895	0.00100462	0.000112711	Bacteria;Bacteroidetes;Flavobacteriia;Flavobacteriales;Flavobacteriaceae;Polaribacter
g_test	sp	New.CleanUp.ReferenceOTU234817	826.791	0	5	0	0	3.88605e-05	0.00124928	0.0018286	1.8366e-06	1.61015e-05	Bacteria;Proteobacteria;Gammaproteobacteria;Thiotrichales;Piscirickettsiaceae;endosymbionts;uncultured bacterium
g_test	sp	New.ReferenceOTU1982	819.325	0	4	0.00151395	5.42523e-06	0	1.64688e-05	3.13369e-05	0	0	Bacteria;Bacteroidetes;Sphingobacteriia;Sphingobacteriales;WCHB1-69
g_test	sp	New.ReferenceOTU439	800.26	0	4	3.42351e-05	0	0	0.00353138	0.000173275	0	4.83045e-05	Bacteria;Bacteroidetes;Flavobacteriia;Flavobacteriales;Flavobacteriaceae;Lutibacter;uncultured Bacteroidetes bacterium
g_test	sp	New.CleanUp.ReferenceOTU484698	792.685	0	5	0.00218915	0.00241784	2.15892e-06	0.000171746	0	1.8366e-06	0	Bacteria;Proteobacteria;Epsilonproteobacteria;Campylobacterales;Helicobacteraceae;Sulfurimonas;uncultured bacterium
g_test	sp	New.ReferenceOTU2448	778.083	0	4	0	0	0	0.000651694	0.00216593	1.8366e-06	1.61015e-05	Unassigned
g_test	sp	DQ415790.1.1470	758.624	0	5	1.71176e-05	1.80841e-05	6.04497e-05	0.00264677	0.000536414	0	0	Bacteria;Proteobacteria;Epsilonproteobacteria;Campylobacterales;Helicobacteraceae;Sulfurovum;uncultured bacterium
g_test	sp	JN662076.1.1367	758.071	0	4	0.00203889	0.000708897	0	0.000654047	0.000193552	0	0	Bacteria;Proteobacteria;Epsilonproteobacteria;Campylobacterales;Helicobacteraceae;Sulfurimonas
g_test	sp	AB476228.1.1464	752.837	0	5	4.94507e-05	5.42523e-06	6.47675e-06	0.00218565	0.00109495	0	0	Bacteria;Proteobacteria;Gammaproteobacteria;Thiotrichales;Thiotrichaceae;uncultured;uncultured bacterium
g_test	sp	EU775002.1.1308	751.685	0	4	0	0	8.63567e-06	0	1.84335e-06	0.000646485	1.61015e-05	Bacteria;Proteobacteria;Gammaproteobacteria;Enterobacteriales;Enterobacteriaceae;Escherichia-Shigella
g_test	sp	AB858629.1.1389	742.151	0	4	0.000203509	1.80841e-06	0	0.000755212	0.00264152	0	0	Bacteria;Spirochaetae;Spirochaetes;Spirochaetales;Spirochaetaceae;Spirochaeta;uncultured bacterium
g_test	sp	New.ReferenceOTU1310	736.299	0	6	0.00197422	0.000399659	4.31784e-06	0.000757565	0.00194842	3.67321e-06	0	Bacteria;Proteobacteria;Gammaproteobacteria;Thiotrichales;Piscirickettsiaceae;Thiomicrospira;uncultured gamma proteobacterium
g_test	sp	FM165252.1.1474	734.696	0	4	0	0	0	1.17634e-05	0.00153551	3.67321e-06	0.0173896	Bacteria;Proteobacteria;Alphaproteobacteria;Rhizobiales;Hyphomicrobiaceae;uncultured;uncultured bacterium
g_test	sp	FJ628226.1.1466	719.293	0	5	0.000445056	0.000376149	7.7721e-05	0.00369372	0.000191708	0	0	Bacteria;Proteobacteria;Epsilonproteobacteria;Campylobacterales;Helicobacteraceae;Sulfurovum;uncultured bacterium
g_test	sp	JN874001.1.1481	683.974	0	5	0.0015577	3.61682e-06	0.00361187	6.11698e-05	6.26739e-05	0	0	Bacteria;Proteobacteria;Epsilonproteobacteria;Campylobacterales;Helicobacteraceae;Sulfurovum;uncultured epsilon proteobacterium
g_test	sp	New.ReferenceOTU2318	672.126	0	5	1.90195e-06	0	0	0.000162335	0.00256225	5.50981e-06	0.000515248	Bacteria;Proteobacteria;Alphaproteobacteria;Caulobacterales;Hyphomonadaceae;Robiginitomaculum;uncultured bacterium
g_test	sp	AF356635.1.1411	664.836	0	5	9.50975e-06	2.53177e-05	0.00267274	2.35269e-06	5.53005e-06	0	0	Archaea;Euryarchaeota;Thermoplasmata;Thermoplasmatales;Deep Sea Hydrothermal Vent Gp 2(DHVEG-2);uncultured archaeon;uncultured archaeon
g_test	sp	JQ195940.1.1350	650.745	0	4	7.03722e-05	5.42523e-06	0	0.000809324	0.00190234	0	0	Bacteria;Bacteroidetes;Flavobacteriia;Flavobacteriales;Cryomorphaceae;Fluviicola;uncultured bacterium
g_test	sp	AY280425.1.1435	628.869	0	5	0.00158242	0.000524439	0.00240503	7.05806e-06	1.65901e-05	0	0	Bacteria;BHI80-139
g_test	sp	New.ReferenceOTU1298	627.563	0	6	0.0012667	1.08505e-05	6.47675e-06	2.35269e-06	5.53005e-06	2.02027e-05	0	Bacteria;Proteobacteria;Epsilonproteobacteria;Campylobacterales;Helicobacteraceae;Sulfurovum;uncultured epsilon proteobacterium
g_test	sp	New.ReferenceOTU2430	623.979	0	4	0.000138842	0	0.0030635	2.58796e-05	9.21674e-06	0	0	Bacteria;Bacteroidetes;Flavobacteriia;Flavobacteriales;R103-B20;uncultured bacterium;uncultured bacterium
g_test	sp	New.ReferenceOTU2573	620.969	0	4	2.66273e-05	0.000815593	0.00172066	0	0	1.8366e-06	0	Bacteria;Proteobacteria;Epsilonproteobacteria;Nautiliales;Nautiliaceae;Caminibacter;uncultured bacterium
g_test	sp	JQ712413.1.1383	618.883	0	5	0.000753172	0.00270176	2.15892e-06	0.00059523	6.26739e-05	0	0	Bacteria;Proteobacteria;Epsilonproteobacteria;Campylobacterales;Helicobacteraceae;Sulfurimonas;uncultured epsilon proteobacterium
g_test	sp	New.ReferenceOTU2614	608.273	0	5	9.69995e-05	1.80841e-06	0.00289079	4.70537e-06	1.84335e-06	0	0	Bacteria;Candidate division OP9;uncultured bacterium;uncultured bacterium;uncultured bacterium;uncultured bacterium;uncultured bacterium
g_test	sp	JN873940.1.1483	602.644	0	5	0.000739859	0.00015914	6.47675e-06	0.00382312	3.6867e-05	0	0	Bacteria;Proteobacteria;Epsilonproteobacteria;Campylobacterales;Helicobacteraceae;Sulfurimonas;uncultured bacterium
g_test	sp	JN874221.1.1469	588.544	0	5	0.000669487	0.000837294	0.000727555	0.00195508	0.000105071	0	0	Bacteria;Proteobacteria;Epsilonproteobacteria;Campylobacterales;Helicobacteraceae;Sulfurovum;uncultured bacterium
g_test	sp	DQ223020.1.1315	588.391	0	4	0	1.80841e-06	0	0	5.53005e-06	1.8366e-06	0.00896854	Bacteria;Proteobacteria;Alphaproteobacteria;Rhodobacterales;Rhodobacteraceae;Tateyamaria
g_test	sp	New.ReferenceOTU40	574.288	0	5	0.00149874	0.000491887	0.000284977	0.000115282	7.37339e-06	0	0	Bacteria;Proteobacteria;Epsilonproteobacteria;Campylobacterales;Helicobacteraceae;Sulfurovum;uncultured bacterium
g_test	sp	New.ReferenceOTU224	570.26	0	4	1.90195e-06	0	0.00226039	9.41075e-06	1.84335e-06	0	0	Bacteria;Aquificae;Aquificae;Aquificales;Desulfurobacteriaceae
g_test	sp	New.ReferenceOTU1769	569.219	0	6	0.00183538	0.000287537	8.63567e-06	0.00122104	0.00175487	4.04053e-05	0	Bacteria;Proteobacteria;Gammaproteobacteria;Thiotrichales;Piscirickettsiaceae;Thiomicrospira;uncultured gamma proteobacterium
g_test	sp	JN662112.1.1361	567.692	0	4	0.00100803	3.61682e-06	2.15892e-06	4.70537e-06	0	0	0	Bacteria;Proteobacteria;Epsilonproteobacteria;Campylobacterales;Helicobacteraceae;Sulfurovum;uncultured bacterium
g_test	sp	New.ReferenceOTU1479	563.654	0	4	0	0	0	0.000141161	0.00274659	0.000123053	0.00020932	Bacteria;Bacteroidetes;Cytophagia;Cytophagales;Flammeovirgaceae;uncultured;uncultured bacterium
g_test	sp	KF746349.99245.100735	557.163	0	4	1.90195e-06	0	8.63567e-06	0	1.84335e-06	0.000483027	0	Bacteria;Cyanobacteria;Chloroplast;uncultured bacterium;uncultured bacterium;uncultured bacterium;uncultured bacterium
g_test	sp	New.ReferenceOTU2434	555.394	0	4	0.000195901	0	0.00285193	7.05806e-06	7.00472e-05	0	0	Bacteria;Chloroflexi;Anaerolineae;Anaerolineales;Anaerolineaceae;uncultured;uncultured organism
g_test	sp	New.ReferenceOTU128	536.45	0	5	0	1.80841e-06	0	0.000230563	0.0024664	7.34642e-06	0.0113677	Bacteria;Proteobacteria;Gammaproteobacteria;Thiotrichales;Piscirickettsiaceae;uncultured;uncultured bacterium
g_test	sp	JN873951.1.1482	528.697	0	5	4.75488e-05	1.80841e-06	0.00230357	6.11698e-05	1.47468e-05	0	0	Bacteria;Proteobacteria;Epsilonproteobacteria;Campylobacterales;Helicobacteraceae;Sulfurovum;uncultured bacterium
g_test	sp	GQ357037.1.1474	527.678	0	5	0.00138652	0.000119355	0	5.41118e-05	0.000694942	0	8.05075e-05	Bacteria;Proteobacteria;Epsilonproteobacteria;Campylobacterales;Helicobacteraceae;Sulfurimonas;uncultured bacterium
g_test	sp	New.CleanUp.ReferenceOTU192371	524.709	0	5	0.00106509	0.000104888	2.15892e-06	9.41075e-06	1.84335e-06	0	0	Bacteria;Proteobacteria;Epsilonproteobacteria;Campylobacterales;Helicobacteraceae;Sulfurovum;uncultured bacterium
g_test	sp	GU220732.1.1474	522.26	0	6	2.09215e-05	5.42523e-06	0	0.00249855	3.13369e-05	1.8366e-06	0.000112711	Bacteria;Proteobacteria;Epsilonproteobacteria;Campylobacterales;Helicobacteraceae;Sulfurovum;uncultured bacterium
g_test	sp	AY531602.1.1475	515.21	0	6	0.000323332	2.35093e-05	1.29535e-05	0.00041172	0.00219174	0	8.05075e-05	Bacteria;Proteobacteria;Epsilonproteobacteria;Campylobacterales;Helicobacteraceae;Sulfurovum;uncultured bacterium
g_test	sp	FN562908.1.1347	509.916	0	4	0	0	4.31784e-06	0.000832851	0.00138067	0	0.000579654	Bacteria;Bacteroidetes;Flavobacteriia;Flavobacteriales;Flavobacteriaceae;uncultured
g_test	sp	New.ReferenceOTU787	509.438	0	4	0.00130474	0.000620285	1.29535e-05	1.17634e-05	0	0	0	Bacteria;Proteobacteria;Epsilonproteobacteria;Campylobacterales;Campylobacteraceae;Arcobacter;uncultured epsilon proteobacterium
g_test	sp	AB476196.1.1434	504.801	0	5	0.000232038	0.000294771	0.000615292	0.00189627	6.26739e-05	0	0	Bacteria;Proteobacteria;Epsilonproteobacteria;Campylobacterales;Helicobacteraceae;Sulfurovum;uncultured bacterium
g_test	sp	AF068783.1.1439	483.974	0	4	0.00105939	9.94625e-05	9.06746e-05	0	0	1.8366e-06	0	Bacteria;Proteobacteria;Epsilonproteobacteria;Campylobacterales;Helicobacteraceae;Sulfurovum
g_test	sp	New.ReferenceOTU934	481.172	0	5	0	1.80841e-06	2.80659e-05	0.00151278	0.000534571	9.18302e-06	0	Bacteria;Proteobacteria;Zetaproteobacteria;Mariprofundales;Mariprofundaceae;Mariprofundus;uncultured bacterium
g_test	sp	FR853023.1.1523	472.871	0	5	0.00118682	1.80841e-06	0.000282818	5.88172e-05	0.000237792	0	0	Bacteria;Proteobacteria;Deltaproteobacteria;Desulfobacterales;Desulfobulbaceae;Desulfobulbus;uncultured bacterium
g_test	sp	New.ReferenceOTU2209	464.809	0	4	3.8039e-06	0	6.90854e-05	0.00182333	0.000112444	0	0	Bacteria;Proteobacteria;Gammaproteobacteria;Thiotrichales;Thiotrichaceae;uncultured
g_test	sp	JQ611114.1.1326	457.418	0	7	0.0012648	6.69112e-05	0.000207256	3.52903e-05	0.000442404	5.50981e-06	4.83045e-05	Bacteria;Proteobacteria;Epsilonproteobacteria;Campylobacterales;Helicobacteraceae;Sulfurovum;uncultured epsilon proteobacterium
g_test	sp	JQ712408.1.1373	445.632	0	7	0.00135799	0.000620285	0.000172713	5.64645e-05	0.000156685	1.28562e-05	1.61015e-05	Bacteria;Proteobacteria;Epsilonproteobacteria;Campylobacterales;Helicobacteraceae;Sulfurovum;uncultured epsilon proteobacterium
g_test	sp	New.ReferenceOTU1127	444.157	0	5	0.000793113	3.61682e-06	2.15892e-06	2.35269e-06	1.84335e-06	0	0	Bacteria;Proteobacteria;Epsilonproteobacteria;Campylobacterales;Helicobacteraceae;Sulfurimonas;uncultured bacterium
g_test	sp	KC682623.1.1471	443.684	0	5	0	1.80841e-06	4.31784e-06	0.00184686	0.000145625	7.34642e-06	0	Bacteria;Bacteroidetes;Flavobacteriia;Flavobacteriales;Flavobacteriaceae;Lutibacter;uncultured bacterium
g_test	sp	New.ReferenceOTU781	438.313	0	4	0	0	0	4.23484e-05	0.00146546	1.8366e-06	0.0103211	Bacteria;Planctomycetes;Planctomycetacia;Planctomycetales;Planctomycetaceae;Bythopirellula;uncultured bacterium
g_test	sp	AB476178.1.1453	429.266	0	4	7.6078e-06	0	4.31784e-06	0.0013975	0.00040738	0	0	Bacteria;Proteobacteria;Gammaproteobacteria;Thiotrichales;Thiotrichaceae;Cocleimonas
g_test	sp	FJ535305.1.1335	427.519	0	4	0.000895819	0.000119355	0	7.05806e-06	1.84335e-06	0	0	Bacteria;Proteobacteria;Epsilonproteobacteria;Campylobacterales;Helicobacteraceae;Sulfurimonas;uncultured epsilon proteobacterium
g_test	sp	FJ792357.1.1332	425.207	0	5	0.000239646	0.000788467	6.47675e-06	0.00146102	0.000108758	0	0	Bacteria;Proteobacteria;Epsilonproteobacteria;Campylobacterales;Campylobacteraceae;Sulfurospirillum;uncultured bacterium
g_test	sp	New.ReferenceOTU556	423.248	0	4	3.8039e-06	3.61682e-06	1.72713e-05	0.0018398	0	0	0	Bacteria;Bacteroidetes;Flavobacteriia;Flavobacteriales;Flavobacteriaceae;Lutibacter;uncultured bacterium
g_test	sp	JX529976.1.1421	420.312	0	4	2.47254e-05	1.80841e-06	0	0.000936369	0.000827664	0	0	Bacteria;Bacteroidetes;Flavobacteriia;Flavobacteriales;Cryomorphaceae;Crocinitomix;uncultured Crocinitomix sp,
g_test	sp	JN874212.1.1472	416.279	0	6	0.0010708	7.59532e-05	0.0002785	0.000152925	3.31803e-05	1.8366e-06	0	Bacteria;Proteobacteria;Epsilonproteobacteria;Campylobacterales;Helicobacteraceae;Sulfurovum;uncultured epsilon proteobacterium
g_test	sp	New.CleanUp.ReferenceOTU827390	415.464	0	4	0	3.61682e-06	2.15892e-06	0.00172922	3.87103e-05	0	0	Bacteria;Bacteroidetes;Flavobacteriia;Flavobacteriales;Flavobacteriaceae;uncultured
g_test	sp	AY531570.1.1473	415.448	0	6	0.00119252	0.000439444	3.88605e-05	0.000207036	1.29034e-05	9.18302e-06	0	Bacteria;Proteobacteria;Epsilonproteobacteria;Campylobacterales;Helicobacteraceae;Sulfurovum;uncultured bacterium
g_test	sp	New.ReferenceOTU2205	415.382	0	4	0	0	0	0.000136456	0.00143044	7.34642e-06	3.2203e-05	Bacteria;Proteobacteria;Gammaproteobacteria;Order Incertae Sedis;Family Incertae Sedis;Marinicella;uncultured bacterium
g_test	sp	New.ReferenceOTU2233	390.663	0	4	0.000315724	0.000553373	0	0.00167041	0.000121661	0	0	Bacteria;Proteobacteria;Epsilonproteobacteria;Campylobacterales;Helicobacteraceae;Sulfurimonas;uncultured bacterium
g_test	sp	New.ReferenceOTU1161	390.098	0	4	6.65683e-05	0	0	0.000145867	0.0016074	0	0.000418639	Bacteria;Proteobacteria;Gammaproteobacteria;Order Incertae Sedis;Family Incertae Sedis;Marinicella;uncultured bacterium
g_test	sp	New.ReferenceOTU2017	387.043	0	5	1.14117e-05	3.61682e-06	0	0.000150572	0.00128297	0	3.2203e-05	Bacteria;Proteobacteria;Gammaproteobacteria;Order Incertae Sedis;Family Incertae Sedis;Marinicella;uncultured bacterium
g_test	sp	FJ717155.1.1348	371.454	0	5	0.000842564	0.00011393	4.53373e-05	6.11698e-05	5.53005e-06	0	0	Bacteria;Proteobacteria;Epsilonproteobacteria;Campylobacterales;Helicobacteraceae;Sulfurovum;uncultured epsilon proteobacterium
g_test	sp	HM799090.1.1392	364.537	0	4	0	0	0	0.000237621	2.21202e-05	1.8366e-06	0.00719737	Bacteria;Proteobacteria;Alphaproteobacteria;Rhodobacterales;Rhodobacteraceae;Roseobacter clade NAC11-7 lineage;uncultured alpha proteobacterium
g_test	sp	New.ReferenceOTU2184	364.498	0	4	0.000100803	2.35093e-05	0	0.00198802	1.10601e-05	0	0	Bacteria;Bacteroidetes;Flavobacteriia;Flavobacteriales;Flavobacteriaceae
g_test	sp	New.ReferenceOTU2295	362.407	0	6	0.000905329	0.000132014	6.26086e-05	0.00168923	0.000304153	5.50981e-06	0	Bacteria;Proteobacteria;Gammaproteobacteria;Thiotrichales;Piscirickettsiaceae;Thiomicrospira;uncultured gamma proteobacterium
g_test	sp	AB095131.1.1049	358.035	0	4	0.000543958	0.00150279	0.000429625	4.70537e-06	0	0	0	Archaea;Euryarchaeota;Archaeoglobi;Archaeoglobales;Archaeoglobaceae;uncultured;uncultured archaeon
g_test	sp	FJ905650.1.1392	357.186	0	4	0	0	0	0.000181157	0.00176224	1.8366e-06	0.00276946	Bacteria;Planctomycetes;Planctomycetacia;Planctomycetales;Planctomycetaceae;Planctomyces;uncultured bacterium
g_test	sp	AY327886.1.1491	356.43	0	5	0.000642859	1.80841e-06	0.00214381	1.17634e-05	1.10601e-05	0	0	Bacteria;Proteobacteria;Deltaproteobacteria;Desulfobacterales;Desulfobulbaceae;Desulfobulbus;uncultured bacterium
g_test	sp	New.ReferenceOTU1055	346.117	0	4	0.000949073	0.000609434	0.000224527	1.88215e-05	0	0	0	Bacteria;Candidate division SR1;uncultured bacterium;uncultured bacterium;uncultured bacterium;uncultured bacterium;uncultured bacterium
g_test	sp	New.ReferenceOTU1165	341.481	0	5	0.000775996	0.000132014	4.31784e-05	0.00175746	5.34571e-05	0	0	Bacteria;Proteobacteria;Epsilonproteobacteria;Campylobacterales;Helicobacteraceae;Sulfurovum;uncultured bacterium
g_test	sp	New.ReferenceOTU1139	334.647	0	4	0.000918642	0.000764957	0	0.000145867	6.45172e-05	0	0	Bacteria;Proteobacteria;Epsilonproteobacteria;Campylobacterales;Helicobacteraceae;Sulfurimonas;uncultured epsilon proteobacterium
g_test	sp	AF420346.1.1474	332.833	0	4	0.000726545	0.000119355	1.94303e-05	2.35269e-06	0	0	0	Bacteria;Proteobacteria;Epsilonproteobacteria;Campylobacterales;Helicobacteraceae;Sulfurovum;uncultured bacterium
g_test	sp	New.ReferenceOTU754	330.905	0	5	1.90195e-06	0	6.47675e-06	0.000936369	0.000409223	0	1.61015e-05	Bacteria;Proteobacteria;Gammaproteobacteria;Thiotrichales;Thiotrichaceae;uncultured;uncultured bacterium
g_test	sp	New.ReferenceOTU1353	329.059	0	4	0.000699918	0.00124599	0.000395082	0	5.53005e-06	0	0	Bacteria;Proteobacteria;Deltaproteobacteria;Desulfurellales;Desulfurellaceae;Hippea
g_test	sp	New.ReferenceOTU389	320.847	0	5	8.55878e-05	5.60607e-05	2.15892e-06	0.00151748	0.000147468	0	0	Bacteria;Proteobacteria;Epsilonproteobacteria;Campylobacterales;Helicobacteraceae;Sulfurovum;uncultured bacterium
g_test	sp	New.CleanUp.ReferenceOTU405768	319.439	0	4	3.8039e-06	0	2.15892e-06	0.00131986	7.37339e-05	0	0	Bacteria;Proteobacteria;Gammaproteobacteria;Methylococcales;Marine Methylotrophic Group 2
g_test	sp	New.CleanUp.ReferenceOTU363246	316.83	0	4	7.6078e-05	0.000128397	0.00143136	7.05806e-06	0	0	0	Archaea;Nanoarchaeota;Nanoarchaeota Incertae Sedis;Unknown Order;Unknown Family;Nanoarchaeum;uncultured nanoarchaeote
g_test	sp	New.CleanUp.ReferenceOTU23903	314.604	0	4	0	0	0	0.000421131	0.00080923	1.8366e-06	4.83045e-05	Bacteria;Proteobacteria;Alphaproteobacteria;Rhizobiales;Phyllobacteriaceae;Pseudahrensia;uncultured bacterium
g_test	sp	FN562850.1.1368	311.655	0	7	0.00105368	7.77616e-05	0.00147454	4.4701e-05	5.34571e-05	2.20393e-05	4.83045e-05	Bacteria;Proteobacteria;Epsilonproteobacteria;Campylobacterales;Helicobacteraceae;Sulfurovum;uncultured epsilon proteobacterium
g_test	sp	New.ReferenceOTU1549	309.728	0	5	0.000823545	0.000452102	2.15892e-06	5.41118e-05	1.65901e-05	0	0	Bacteria;Proteobacteria;Epsilonproteobacteria;Campylobacterales;Helicobacteraceae;Sulfurimonas
g_test	sp	FN562878.1.1304	284.564	0	6	0.000625742	0.000222434	0.000427466	0.000414073	0.00044056	0	6.4406e-05	Bacteria;BD1-5;uncultured bacterium;uncultured bacterium;uncultured bacterium;uncultured bacterium;uncultured bacterium
g_test	sp	EF219007.1.1376	279.048	0	4	7.22741e-05	0.00116823	0	2.11742e-05	1.84335e-06	0	0	Bacteria;Proteobacteria;Epsilonproteobacteria;Campylobacterales;Helicobacteraceae;Sulfurimonas;uncultured bacterium
g_test	sp	New.ReferenceOTU2528	278.042	0	4	5.70585e-05	0.00113568	2.15892e-06	1.17634e-05	0	0	0	Bacteria;Proteobacteria;Epsilonproteobacteria;Campylobacterales;Helicobacteraceae;Sulfurimonas;uncultured bacterium
g_test	sp	New.ReferenceOTU520	277.521	0	4	0.000694212	0.000287537	2.15892e-06	7.05806e-06	0	0	0	Bacteria;Proteobacteria;Epsilonproteobacteria;Campylobacterales;Campylobacteraceae;Thiofractor;uncultured bacterium
g_test	sp	New.ReferenceOTU2402	276.818	0	5	1.90195e-05	3.61682e-06	0	0.000444658	0.00077052	5.50981e-06	0	Bacteria;Proteobacteria;Gammaproteobacteria;Thiotrichales;Piscirickettsiaceae;Thiomicrospira;uncultured gamma proteobacterium
g_test	sp	FN562904.1.1341	271.173	0	4	5.32546e-05	5.42523e-06	0	0.00103989	0.000313369	0	0	Bacteria;Bacteroidetes;Flavobacteriia;Flavobacteriales;Flavobacteriaceae;uncultured;uncultured bacterium
g_test	sp	JQ611102.1.1398	270.196	0	5	0.000694212	0.000224243	2.15892e-06	0.000785797	0.000234105	0	0	Bacteria;Bacteroidetes;Flavobacteriia;Flavobacteriales;Flavobacteriaceae;Lutibacter;uncultured bacterium
g_test	sp	New.CleanUp.ReferenceOTU634501	268.714	0	4	0	0	0	9.41075e-06	0.000949325	1.8366e-06	1.61015e-05	Bacteria;Bacteroidetes;Flavobacteriia;Flavobacteriales;Flavobacteriaceae;Lutibacter;uncultured Bacteroidetes bacterium
g_test	sp	New.ReferenceOTU1637	260.166	0	4	0.000648565	5.96775e-05	0	0.000959896	0.000287562	0	0	Unassigned
g_test	sp	New.CleanUp.ReferenceOTU436199	257.248	0	4	0.000454566	0	0	2.35269e-06	5.53005e-06	0	8.05075e-05	Bacteria;Proteobacteria;Gammaproteobacteria;Alteromonadales;Colwelliaceae;Colwellia
g_test	sp	New.ReferenceOTU1047	254.794	0	4	0.000684702	0.000338173	0.000604497	3.05849e-05	0	0	0	Bacteria;Aquificae;Aquificae;Aquificales;Desulfurobacteriaceae;Thermovibrio
g_test	sp	New.CleanUp.ReferenceOTU815040	245.92	0	4	1.90195e-06	3.61682e-06	0.000986626	2.35269e-06	0	0	0	Bacteria;Proteobacteria;Epsilonproteobacteria;Nautiliales;Nautiliaceae;Nitratifractor;uncultured bacterium
g_test	sp	FN562851.1.1351	245.636	0	5	0.000606722	0.00108866	6.47675e-06	6.35225e-05	0	1.8366e-06	0	Bacteria;Proteobacteria;Epsilonproteobacteria;Campylobacterales;Helicobacteraceae;Sulfurovum;uncultured bacterium
g_test	sp	New.ReferenceOTU2307	242.329	0	5	9.31956e-05	0.000763149	0.000371334	4.70537e-06	1.29034e-05	0	0	Bacteria;Proteobacteria;Epsilonproteobacteria;Nautiliales;Nautiliaceae;Nitratifractor
g_test	sp	AB611366.1.906	242.104	0	4	4.94507e-05	0.000130206	0.00103196	4.70537e-06	0	0	0	Archaea;Nanoarchaeota;Nanoarchaeota Incertae Sedis;Unknown Order;Unknown Family;Nanoarchaeum;uncultured nanoarchaeote
g_test	sp	KF624439.1.1297	240.76	0	5	0.00016547	0.000526247	6.47675e-06	0.000795208	3.87103e-05	0	0	Bacteria;Proteobacteria;Epsilonproteobacteria;Campylobacterales;Helicobacteraceae;Sulfurimonas;uncultured bacterium
g_test	sp	FJ348469.1.1394	238.715	0	4	0	0	0	4.70537e-06	0.00131246	1.8366e-06	0.00228641	Bacteria;Bacteroidetes;Flavobacteriia;Flavobacteriales;Flavobacteriaceae
g_test	sp	HE576793.1.1403	236.886	0	5	0.000517331	1.62757e-05	0	0.000181157	0.00107099	1.8366e-06	0	Bacteria;Bacteroidetes;Flavobacteriia;Flavobacteriales;Flavobacteriaceae;uncultured;uncultured Bacteroidetes bacterium
g_test	sp	New.ReferenceOTU1385	223.385	0	4	0.000410821	1.80841e-06	0	2.35269e-06	7.37339e-06	0	0	Bacteria;Proteobacteria;Gammaproteobacteria;Thiotrichales;Piscirickettsiaceae;Thiomicrospira;uncultured gamma proteobacterium
g_test	sp	AJ535243.1.1522	219.148	0	4	6.46663e-05	0	1.29535e-05	0.00117399	3.6867e-05	0	0	Bacteria;Proteobacteria;Deltaproteobacteria;Desulfobacterales;Desulfobulbaceae;uncultured
g_test	sp	AB476198.1.1452	218.027	0	5	1.90195e-06	3.61682e-06	1.72713e-05	0.000167041	0.000604618	0	0	Bacteria;Proteobacteria;Gammaproteobacteria;Thiotrichales;Thiotrichaceae;uncultured
g_test	sp	FR853007.1.1516	216.019	0	5	0.000475488	5.42523e-06	5.1814e-05	3.05849e-05	2.21202e-05	0	0	Bacteria;Proteobacteria;Deltaproteobacteria;Desulfobacterales;Desulfobulbaceae;Desulfobulbus;uncultured delta proteobacterium
g_test	sp	FN553958.1.1484	209.605	0	5	0.00038039	0.000132014	1.29535e-05	0.00103283	0.000134564	0	0	Bacteria;Proteobacteria;Epsilonproteobacteria;Campylobacterales;Helicobacteraceae;Sulfurimonas
g_test	sp	New.CleanUp.ReferenceOTU203232	205.603	0	4	0.000439351	3.61682e-06	0	3.05849e-05	4.42404e-05	0	0	Bacteria;Bacteroidetes;Bacteroidia;Bacteroidales;Marinilabiaceae;uncultured
g_test	sp	JQ712374.1.1378	203.457	0	4	0.000378488	3.61682e-06	2.15892e-06	9.41075e-06	0	0	0	Bacteria;Proteobacteria;Epsilonproteobacteria;Campylobacterales;Campylobacteraceae;Arcobacter;uncultured epsilon proteobacterium
g_test	sp	New.ReferenceOTU403	201.339	0	4	3.8039e-05	0.000806551	2.15892e-06	1.88215e-05	0	0	0	Bacteria;Proteobacteria;Epsilonproteobacteria;Campylobacterales;Helicobacteraceae;Sulfurimonas;uncultured bacterium
g_test	sp	New.CleanUp.ReferenceOTU52031	201.115	0	4	0.000270077	0.000213392	0	3.52903e-05	0.000827664	0	0	Bacteria;BD1-5;uncultured bacterium;uncultured bacterium;uncultured bacterium;uncultured bacterium;uncultured bacterium
g_test	sp	GU291345.1.1506	198.815	0	4	3.8039e-06	0	0	5.17591e-05	0.0003742	0.000273654	0	Bacteria;Proteobacteria;Deltaproteobacteria;Desulfuromonadales;Desulfuromonadaceae;Desulfuromusa;uncultured bacterium
g_test	sp	JX525515.1.1426	198.348	0	4	1.90195e-06	0	2.15892e-06	0.000444658	0.000337333	0	0	Bacteria;Bacteroidetes;Flavobacteriia;Flavobacteriales;Flavobacteriaceae;uncultured
g_test	sp	New.ReferenceOTU2265	197.712	0	4	7.6078e-06	0	0.000829024	9.41075e-06	3.6867e-06	0	0	Bacteria;Proteobacteria;Epsilonproteobacteria;Nautiliales;Nautiliaceae;Nitratifractor;uncultured bacterium
g_test	sp	FN562823.1.1291	193.903	0	4	0.000110313	1.80841e-05	0	0.00028938	0.000698629	0	0	Bacteria;Proteobacteria;Gammaproteobacteria;Thiotrichales;Thiotrichaceae;uncultured;uncultured bacterium
g_test	sp	New.ReferenceOTU985	189.449	0	5	2.28234e-05	0	0.000882997	3.05849e-05	5.53005e-06	1.8366e-06	0	Bacteria;Proteobacteria;Epsilonproteobacteria;Campylobacterales;Helicobacteraceae;Sulfurovum;uncultured epsilon proteobacterium
g_test	sp	New.ReferenceOTU440	189.303	0	4	1.90195e-05	3.25514e-05	0.000822548	0	1.84335e-06	0	0	Bacteria;Proteobacteria;Epsilonproteobacteria;Campylobacterales;Campylobacteraceae;Campylobacter;uncultured epsilon proteobacterium
g_test	sp	New.ReferenceOTU446	186.488	0	4	0.00044886	0	8.63567e-06	2.58796e-05	0.000127191	0	0	Bacteria;Proteobacteria;Deltaproteobacteria;Desulfobacterales;Desulfobulbaceae;Desulfobulbus
g_test	sp	New.CleanUp.ReferenceOTU886493	186.462	0	5	0.000329037	0.000920481	2.15892e-06	3.7643e-05	5.53005e-06	0	0	Bacteria;Proteobacteria;Epsilonproteobacteria;Campylobacterales;Helicobacteraceae;Sulfurimonas;uncultured bacterium
g_test	sp	New.ReferenceOTU1609	184.53	0	4	0.000349959	1.08505e-05	0	2.35269e-06	3.6867e-06	0	0	Bacteria;Proteobacteria;Deltaproteobacteria;Bdellovibrionales;Bdellovibrionaceae;Bdellovibrio;uncultured bacterium
g_test	sp	New.ReferenceOTU36	183.763	0	5	0.000505919	1.98925e-05	8.63567e-05	0.000442305	4.79271e-05	0	0	Bacteria;BD1-5;uncultured bacterium;uncultured bacterium;uncultured bacterium;uncultured bacterium;uncultured bacterium
g_test	sp	EU107485.1.1485	182.455	0	4	0	0	0	7.99913e-05	0.00076499	1.8366e-06	0.000402538	Bacteria;Proteobacteria;Gammaproteobacteria;Thiotrichales;Thiotrichaceae;Thiothrix;uncultured bacterium
g_test	sp	New.CleanUp.ReferenceOTU934045	181.691	0	4	0.000329037	1.80841e-06	2.15892e-06	2.35269e-06	0	0	0	Bacteria;Proteobacteria;Epsilonproteobacteria;Campylobacterales;Helicobacteraceae;Sulfurimonas;uncultured bacterium
g_test	sp	New.ReferenceOTU1434	180.997	0	7	4.18429e-05	3.61682e-06	2.15892e-06	0.000769328	0.000700472	8.44838e-05	0.000161015	Bacteria;Proteobacteria;Alphaproteobacteria;Rhodobacterales;Rhodobacteraceae;uncultured;uncultured bacterium
g_test	sp	FN553949.1.1479	179.475	0	4	0	0	0	2.35269e-06	0.000558535	3.67321e-06	0.00460503	Bacteria;Bacteroidetes;Cytophagia;Cytophagales;Flammeovirgaceae;uncultured;uncultured bacterium
g_test	sp	New.ReferenceOTU1731	178.825	0	6	4.94507e-05	1.80841e-06	2.15892e-06	0.0002188	0.000643329	1.8366e-06	0	Bacteria;Proteobacteria;Gammaproteobacteria;Thiotrichales;Piscirickettsiaceae;Thiomicrospira;uncultured gamma proteobacterium
g_test	sp	AY548973.1.1343	177.443	0	5	0.000182587	8.49953e-05	3.23838e-05	0.00103753	5.53005e-06	0	0	Bacteria;Proteobacteria;Epsilonproteobacteria;Campylobacterales;Campylobacteraceae;Sulfurospirillum;uncultured bacterium
g_test	sp	AJ441200.1.1419	177.286	0	5	0.000365175	0.000840911	2.15892e-06	1.88215e-05	1.10601e-05	0	0	Bacteria;Proteobacteria;Epsilonproteobacteria;Campylobacterales;Helicobacteraceae;Sulfurimonas
g_test	sp	New.ReferenceOTU1277	176.491	0	4	0.000150254	2.89346e-05	0	0.000432894	0.000540101	0	0	Unassigned
g_test	sp	New.ReferenceOTU503	176.422	0	4	0.000403214	6.14859e-05	1.29535e-05	0	0	1.8366e-06	0	Bacteria;Proteobacteria;Epsilonproteobacteria;Campylobacterales;Helicobacteraceae;Sulfurovum;uncultured bacterium
g_test	sp	New.CleanUp.ReferenceOTU931727	175.583	0	6	1.90195e-06	0	1.07946e-05	0.00059523	0.000576968	9.18302e-06	0.00120761	Bacteria;Proteobacteria;Alphaproteobacteria;Rhodobacterales;Rhodobacteraceae;uncultured;uncultured bacterium
g_test	sp	New.ReferenceOTU1871	173.572	0	4	0.00047739	0.000321897	0	9.88128e-05	2.39635e-05	0	0	Bacteria;Proteobacteria;Epsilonproteobacteria;Campylobacterales;Helicobacteraceae;Sulfurimonas
g_test	sp	AJ704703.1.1485	172.867	0	4	0	0	0	7.05806e-06	0.000683882	1.8366e-06	0.000112711	Bacteria;Bacteroidetes;Flavobacteriia;Flavobacteriales;Flavobacteriaceae
g_test	sp	New.ReferenceOTU1488	172.347	0	4	0	0	0	9.41075e-06	0.000777893	1.8366e-06	0.000386436	Bacteria;Proteobacteria;Alphaproteobacteria;DB1-14;uncultured bacterium;uncultured bacterium;uncultured bacterium
g_test	sp	New.CleanUp.ReferenceOTU92057	170.61	0	4	0	0	0	2.35269e-06	0.000707846	1.8366e-06	0.000177117	Bacteria;Bacteroidetes;Flavobacteriia;Flavobacteriales;Flavobacteriaceae
g_test	sp	New.CleanUp.ReferenceOTU676157	168.303	0	4	1.90195e-06	0	8.63567e-06	0.000689337	3.87103e-05	0	0	Bacteria;Bacteroidetes;Sphingobacteriia;Sphingobacteriales;Chitinophagaceae;uncultured;uncultured bacterium
g_test	sp	KF545018.1.1466	167.874	0	4	3.9941e-05	0.000325514	0	0.000482301	1.10601e-05	0	0	Bacteria;Proteobacteria;Epsilonproteobacteria;Campylobacterales;Helicobacteraceae;Sulfurovum;uncultured bacterium
g_test	sp	JQ287298.1.1469	167.805	0	4	0.000412723	0.000690813	0	9.41075e-06	1.47468e-05	0	0	Bacteria;Proteobacteria;Epsilonproteobacteria;Campylobacterales;Campylobacteraceae;Sulfurospirillum;uncultured bacterium
g_test	sp	FJ535264.1.1335	167.643	0	5	5.70585e-06	1.80841e-06	4.31784e-06	0.000705806	4.79271e-05	0	0	Bacteria;Proteobacteria;Epsilonproteobacteria;Campylobacterales;Helicobacteraceae;Sulfurovum;uncultured bacterium
g_test	sp	New.ReferenceOTU2287	166.932	0	6	2.47254e-05	0	2.15892e-06	0.000708159	0.000392633	1.8366e-05	0.000273726	Bacteria;Proteobacteria;Alphaproteobacteria;Rhodobacterales;Rhodobacteraceae;uncultured;uncultured bacterium
g_test	sp	New.ReferenceOTU639	166.402	0	5	0.000367076	0.000748682	2.15892e-06	4.23484e-05	1.84335e-06	0	0	Bacteria;Proteobacteria;Epsilonproteobacteria;Campylobacterales;Helicobacteraceae;Sulfurovum;uncultured epsilon proteobacterium
g_test	sp	New.CleanUp.ReferenceOTU90435	160.779	0	4	4.37449e-05	0	0	5.64645e-05	0.000693099	1.8366e-06	0	Bacteria;Bacteroidetes;VC2,1 Bac22;uncultured bacterium;uncultured bacterium;uncultured bacterium;uncultured bacterium
g_test	sp	GQ848454.1.1457	160.115	0	4	0	0	2.15892e-06	0.000689337	1.65901e-05	0	1.61015e-05	Bacteria;Proteobacteria;Epsilonproteobacteria;Campylobacterales;Helicobacteraceae;Sulfurimonas;uncultured epsilon proteobacterium
g_test	sp	AB476234.1.1464	160.115	0	4	1.90195e-06	0	1.29535e-05	0.000609346	7.00472e-05	0	0	Bacteria;Proteobacteria;Gammaproteobacteria;Methylococcales;Marine Methylotrophic Group 2;uncultured bacterium;uncultured bacterium
g_test	sp	New.ReferenceOTU870	158.653	0	5	0	0	8.63567e-06	0.00012234	0.00076499	8.63204e-05	1.61015e-05	Bacteria;Proteobacteria;Gammaproteobacteria;Chromatiales;Ectothiorhodospiraceae;Acidiferrobacter;uncultured bacterium
g_test	sp	AF449231.1.1429	157.247	0	5	0.000346155	1.98925e-05	4.31784e-06	2.82322e-05	0	1.8366e-06	0	Bacteria;Proteobacteria;Epsilonproteobacteria;Campylobacterales;Helicobacteraceae;Sulfurovum;uncultured bacterium
g_test	sp	EU652527.1.1506	153.641	0	4	0	3.61682e-06	0	0	1.84335e-06	1.8366e-06	0.00249573	Bacteria;Proteobacteria;Gammaproteobacteria;Xanthomonadales;JTB255 marine benthic group;uncultured bacterium;uncultured bacterium
g_test	sp	KF545063.1.1478	151.185	0	5	3.8039e-06	3.61682e-06	1.29535e-05	0.000585819	6.63605e-05	0	0	Bacteria;Proteobacteria;Epsilonproteobacteria;Campylobacterales;Helicobacteraceae;Sulfurovum;uncultured Sulfurovum sp,
g_test	sp	AY672499.1.1488	149.986	0	6	0.000414625	0.000578691	1.29535e-05	3.05849e-05	9.21674e-06	1.8366e-06	0	Bacteria;Proteobacteria;Epsilonproteobacteria;Campylobacterales;Helicobacteraceae;Sulfurovum;uncultured bacterium
g_test	sp	GQ261309.1.1421	148.474	0	5	3.8039e-06	5.42523e-06	1.72713e-05	0.000155277	0.000388947	0	0	Bacteria;Proteobacteria;Epsilonproteobacteria;Campylobacterales;Helicobacteraceae;Sulfurovum;uncultured epsilon proteobacterium
g_test	sp	FJ792191.1.1357	147.919	0	5	1.33137e-05	1.80841e-06	8.63567e-06	0.000487006	0.000180648	0	0	Bacteria;Bacteroidetes;Sphingobacteriia;Sphingobacteriales;Chitinophagaceae;uncultured;uncultured bacterium
g_test	sp	New.ReferenceOTU1309	147.018	0	4	1.90195e-06	3.61682e-06	0	0.000383488	0.000210142	0	0	Bacteria;Bacteroidetes;Flavobacteriia;Flavobacteriales;Flavobacteriaceae;uncultured;uncultured bacterium
g_test	sp	EU050908.1.1396	144.199	0	4	3.8039e-06	0	0	0.000141161	0.000180648	0	0.00328471	Bacteria;Bacteroidetes;Cytophagia;Cytophagales;Flammeovirgaceae;Reichenbachiella;uncultured bacterium
g_test	sp	DQ270620.1.1452	143.988	0	4	0	0	2.15892e-06	3.7643e-05	0.000503234	3.67321e-06	0	Bacteria;Proteobacteria;Gammaproteobacteria;Methylococcales;IheB2-23;uncultured bacterium;uncultured bacterium
g_test	sp	New.ReferenceOTU330	140.694	0	4	3.04312e-05	3.61682e-06	0	0.000712864	3.50236e-05	0	0	Bacteria;Proteobacteria;Epsilonproteobacteria;Campylobacterales;Helicobacteraceae;Sulfurimonas;uncultured bacterium
g_test	sp	FJ535253.1.1337	137.035	0	4	7.6078e-06	5.42523e-06	0	0.000635225	7.37339e-06	0	0	Bacteria;Proteobacteria;Epsilonproteobacteria;Campylobacterales;Helicobacteraceae;Sulfurimonas;uncultured epsilon proteobacterium
g_test	sp	New.ReferenceOTU2188	135.472	0	4	0.000251057	1.80841e-06	0	4.70537e-06	1.84335e-06	0	0	Bacteria;Proteobacteria;Deltaproteobacteria;Desulfobacterales;Desulfobulbaceae;Desulfobulbus;uncultured delta proteobacterium
g_test	sp	New.ReferenceOTU1002	134.93	0	4	3.8039e-06	0	1.07946e-05	0.000543471	4.97704e-05	0	0	Bacteria;Bacteroidetes;Flavobacteriia;Flavobacteriales;Flavobacteriaceae
g_test	sp	JQ287089.1.1471	131.787	0	5	0.000102705	3.61682e-06	0	0.000806971	4.05537e-05	0	4.83045e-05	Bacteria;Proteobacteria;Epsilonproteobacteria;Campylobacterales;Helicobacteraceae;Sulfurovum;uncultured bacterium
g_test	sp	New.CleanUp.ReferenceOTU223912	131.193	0	5	3.04312e-05	3.61682e-06	4.31784e-06	0.000343492	0.000285719	0	0	Bacteria;Bacteroidetes;Flavobacteriia;Flavobacteriales;Cryomorphaceae;Fluviicola
g_test	sp	JX403051.1.1513	130.429	0	4	0.000359469	0.000343598	0	4.70537e-06	5.53005e-06	0	0	Bacteria;Proteobacteria;Epsilonproteobacteria;Campylobacterales;Helicobacteraceae;Sulfurovum;uncultured bacterium
g_test	sp	JN662118.1.1367	129.103	0	5	0.000123627	9.22289e-05	0.000200779	0.000465832	4.42404e-05	0	0	Bacteria;Proteobacteria;Epsilonproteobacteria;Campylobacterales;Helicobacteraceae;Sulfurovum;uncultured epsilon proteobacterium
g_test	sp	JX526682.1.1430	122.01	0	4	0	0	0	3.05849e-05	0.000444247	1.8366e-06	3.2203e-05	Bacteria;Bacteroidetes;Flavobacteriia;Flavobacteriales;Cryomorphaceae;Crocinitomix;uncultured bacterium
g_test	sp	New.ReferenceOTU126	121.4	0	4	0.000334743	3.61682e-06	0	0.000256443	0.000127191	0	0	Unassigned
g_test	sp	JQ287050.1.1446	120.569	0	4	0	0	0	1.88215e-05	0.000641485	4.59151e-05	3.2203e-05	Bacteria;Proteobacteria;Alphaproteobacteria;Rhizobiales;Phyllobacteriaceae;Pseudahrensia;uncultured bacterium
g_test	sp	AJ575988.1.1298	120.247	0	5	0.000329037	0	2.15892e-06	0.000103518	0.000267286	0	1.61015e-05	Bacteria;Bacteroidetes;Sphingobacteriia;Sphingobacteriales;WCHB1-69
g_test	sp	New.ReferenceOTU433	115.487	0	5	0.000336645	7.41448e-05	0	0.000105871	7.37339e-05	1.8366e-06	0	Bacteria;Proteobacteria;Gammaproteobacteria;Thiotrichales;Piscirickettsiaceae;Thiomicrospira;uncultured gamma proteobacterium
g_test	sp	DQ270624.1.1491	114.924	0	4	0.000313822	5.42523e-06	0	0.000357608	8.29507e-05	0	0	Bacteria;Proteobacteria;Gammaproteobacteria;Thiotrichales;Piscirickettsiaceae;Thiomicrospira;uncultured gamma proteobacterium
g_test	sp	FJ535273.1.1334	114.679	0	5	1.14117e-05	3.25514e-05	0.000142489	0.00035055	1.84335e-05	0	0	Bacteria;Proteobacteria;Epsilonproteobacteria;Campylobacterales;Helicobacteraceae;Sulfurovum;uncultured bacterium
g_test	sp	New.ReferenceOTU1118	110.991	0	4	0	0	0	7.05806e-06	0.000595402	1.8366e-06	0.000692365	Bacteria;Planctomycetes;Planctomycetacia;Planctomycetales;Planctomycetaceae;Pirellula
g_test	sp	New.ReferenceOTU1374	109.006	0	4	0	0	0	1.17634e-05	0.00149127	0.000110196	0.0021898	Bacteria;Bacteroidetes;Flavobacteriia;Flavobacteriales;Flavobacteriaceae;Maritimimonas
g_test	sp	New.CleanUp.ReferenceOTU1067318	106.939	0	4	0.000226332	1.80841e-05	0	9.41075e-06	7.37339e-06	0	0	Unassigned
g_test	sp	AB193955.1.1475	106.287	0	4	0	0	1.51124e-05	0.000348198	0.000101384	1.8366e-06	0	Bacteria;Proteobacteria;Epsilonproteobacteria;Campylobacterales;Helicobacteraceae;Sulfurovum;uncultured bacterium
g_test	sp	JQ611155.1.1358	105.251	0	4	0.000287195	0.000327322	0	2.35269e-06	5.53005e-06	0	0	Bacteria;Proteobacteria;Epsilonproteobacteria;Campylobacterales;Campylobacteraceae;Sulfurospirillum;uncultured bacterium
g_test	sp	New.ReferenceOTU2248	105.017	0	4	0	0	0	2.35269e-06	0.000442404	0.000343445	0.00170676	Bacteria;Bacteroidetes;Cytophagia;Cytophagales;Flammeovirgaceae;Reichenbachiella;uncultured bacterium
g_test	sp	New.ReferenceOTU881	103.613	0	5	0.000334743	9.22289e-05	2.15892e-06	0	1.84335e-06	1.46928e-05	0	Bacteria;Proteobacteria;Epsilonproteobacteria;Nautiliales;Nautiliaceae;uncultured;uncultured epsilon proteobacterium
g_test	sp	New.CleanUp.ReferenceOTU825255	103.382	0	4	0.000285293	0.000222434	0	6.11698e-05	9.21674e-06	0	0	Unassigned
g_test	sp	New.CleanUp.ReferenceOTU22432	102.992	0	4	0.000239646	0	4.74962e-05	1.17634e-05	1.65901e-05	0	0	Bacteria;Proteobacteria;Deltaproteobacteria;Desulfobacterales;Desulfobulbaceae;Desulfobulbus;uncultured bacterium
g_test	sp	JX403058.1.1513	102.967	0	4	0.000104607	0.000368916	0	0.000136456	5.89872e-05	0	0	Bacteria;Proteobacteria;Epsilonproteobacteria;Campylobacterales;Helicobacteraceae;Sulfurimonas
g_test	sp	AJ441204.1.1419	102.339	0	4	1.71176e-05	0	2.15892e-06	0.000515238	1.65901e-05	0	0	Bacteria;Proteobacteria;Epsilonproteobacteria;Campylobacterales;Helicobacteraceae;Sulfurovum;uncultured bacterium
g_test	sp	New.ReferenceOTU46	101.132	0	6	0.000114117	9.04205e-06	2.15892e-06	0.000228211	0.000422127	3.67321e-06	0	Bacteria;Proteobacteria;Gammaproteobacteria;Thiotrichales;Piscirickettsiaceae;Thiomicrospira;uncultured gamma proteobacterium
g_test	sp	AY531590.1.1473	99.984	0	4	1.90195e-06	0	0.000449055	0	1.47468e-05	3.67321e-06	0	Bacteria;Proteobacteria;Epsilonproteobacteria;Campylobacterales;Campylobacteraceae;Campylobacter;uncultured bacterium
g_test	sp	AB842286.1.1461	99.9746	0	5	7.6078e-06	0	0	0.000214094	0.00100278	0.000168968	0.00887193	Bacteria;Verrucomicrobia;Verrucomicrobiae;Verrucomicrobiales;DEV007;uncultured bacterium;uncultured bacterium
g_test	sp	New.ReferenceOTU1897	97.701	0	4	0.000228234	5.60607e-05	0	4.70537e-06	3.6867e-06	0	0	Bacteria;Proteobacteria;Epsilonproteobacteria;Campylobacterales;Campylobacteraceae;Sulfurospirillum;uncultured bacterium
g_test	sp	New.ReferenceOTU750	97.4233	0	4	0	1.80841e-06	0	0.000265854	0.000276502	0	0.000547451	Bacteria;Proteobacteria;Alphaproteobacteria;Rhodobacterales;Rhodobacteraceae;uncultured;uncultured bacterium
g_test	sp	New.CleanUp.ReferenceOTU617032	97.2337	0	4	0.000228234	3.9785e-05	0	3.05849e-05	1.84335e-06	0	0	Bacteria;Proteobacteria;Gammaproteobacteria;Thiotrichales;Piscirickettsiaceae;Thiomicrospira;uncultured gamma proteobacterium
g_test	sp	New.ReferenceOTU2533	96.2539	0	4	0.000220626	0.000320089	0	0.000134103	2.02768e-05	0	0	Bacteria;Proteobacteria;Epsilonproteobacteria;Campylobacterales;Helicobacteraceae;Sulfurovum;uncultured bacterium
g_test	sp	New.ReferenceOTU953	95.8212	0	4	0	1.80841e-06	0	6.82279e-05	0.000285719	0	1.61015e-05	Bacteria;Proteobacteria;Gammaproteobacteria;Order Incertae Sedis;Family Incertae Sedis;Marinicella;uncultured bacterium
g_test	sp	New.ReferenceOTU242	95.0491	0	4	0.000239646	0	2.80659e-05	7.29333e-05	2.39635e-05	0	0	Bacteria;Bacteroidetes;Sphingobacteriia;Sphingobacteriales;WCHB1-69;uncultured bacterium;uncultured bacterium
g_test	sp	New.CleanUp.ReferenceOTU301769	92.243	0	4	0	0	0	7.05806e-06	0.000475584	1.8366e-06	0.000418639	Unassigned
g_test	sp	HQ153866.1.1384	89.5053	0	5	0.000247254	0.000224243	8.63567e-06	7.05806e-06	1.84335e-06	0	0	Bacteria;Proteobacteria;Epsilonproteobacteria;Campylobacterales;Helicobacteraceae;Sulfurovum;uncultured bacterium
g_test	sp	New.CleanUp.ReferenceOTU815228	87.0951	0	4	7.6078e-06	1.80841e-06	0	0.00041172	1.29034e-05	0	0	Bacteria;Bacteroidetes;Flavobacteriia;Flavobacteriales;Flavobacteriaceae;Lutibacter;uncultured bacterium
g_test	sp	AB176113.1.1296	86.1243	0	5	3.8039e-05	1.80841e-06	2.15892e-06	0.000190568	0.000252539	0	0	Bacteria;Proteobacteria;Epsilonproteobacteria;Campylobacterales;Helicobacteraceae;Sulfurimonas;uncultured bacterium
g_test	sp	New.CleanUp.ReferenceOTU331555	82.2455	0	4	0	1.80841e-06	0	3.52903e-05	0.000265442	0	1.61015e-05	Bacteria;Proteobacteria;Gammaproteobacteria;Order Incertae Sedis;Family Incertae Sedis;Marinicella;uncultured bacterium
g_test	sp	New.ReferenceOTU478	81.7342	0	4	0	0	0	3.05849e-05	0.000129034	1.8366e-06	0.00204489	Bacteria;Proteobacteria;Alphaproteobacteria;OCS116 clade;uncultured bacterium;uncultured bacterium;uncultured bacterium
g_test	sp	New.ReferenceOTU1513	80.9567	0	4	0	7.23364e-06	2.15892e-06	0.000282322	4.60837e-05	0	0	Bacteria;Proteobacteria;Gammaproteobacteria;Thiotrichales;Piscirickettsiaceae;Thiomicrospira;uncultured gamma proteobacterium
g_test	sp	DQ071289.1.1344	80.8921	0	6	0.000116019	0.000406892	2.15892e-06	9.88128e-05	1.84335e-05	3.67321e-06	0	Bacteria;Proteobacteria;Epsilonproteobacteria;Campylobacterales;Campylobacteraceae;Arcobacter;uncultured epsilon proteobacterium
g_test	sp	New.ReferenceOTU2419	80.8365	0	4	0.000235842	3.61682e-06	0.000155442	0	0	1.8366e-06	0	Bacteria;Proteobacteria;Epsilonproteobacteria;Nautiliales;Nautiliaceae;Caminibacter
g_test	sp	HM481300.1.1434	77.5591	0	5	1.52156e-05	0.000303813	0	4.70537e-06	1.84335e-05	0	1.61015e-05	Bacteria;Proteobacteria;Epsilonproteobacteria;Campylobacterales;Helicobacteraceae;Sulfurimonas;uncultured bacterium
g_test	sp	New.CleanUp.ReferenceOTU407076	75.0784	0	4	0.000201607	0.000260411	2.15892e-06	2.35269e-06	0	0	0	Bacteria;Proteobacteria;Epsilonproteobacteria;Campylobacterales;Campylobacteraceae;Thiofractor;uncultured bacterium
g_test	sp	New.ReferenceOTU1092	74.7355	1.71991e-16	5	0.00022443	3.25514e-05	0	0.000164688	0.000138251	1.8366e-06	0	Bacteria;Proteobacteria;Gammaproteobacteria;Thiotrichales;Piscirickettsiaceae;Thiomicrospira;uncultured gamma proteobacterium
g_test	sp	New.CleanUp.ReferenceOTU813257	73.5713	1.71991e-16	4	1.90195e-06	0	6.47675e-06	0.000308202	1.84335e-05	0	0	Bacteria;Proteobacteria;Gammaproteobacteria;Thiotrichales;Piscirickettsiaceae;Thiomicrospira;uncultured gamma proteobacterium
g_test	sp	AY672518.1.1495	70.9133	6.8632e-16	4	0.000193999	5.42523e-06	0.000261229	2.35269e-06	0	0	0	Bacteria;Proteobacteria;Epsilonproteobacteria;Campylobacterales;Helicobacteraceae;Sulfurovum;uncultured epsilon proteobacterium
g_test	sp	New.CleanUp.ReferenceOTU1069314	70.3122	8.55852e-16	4	0.000192097	0.000115738	0	3.05849e-05	1.84335e-06	0	0	Bacteria;Proteobacteria;Gammaproteobacteria;Thiotrichales;Piscirickettsiaceae;Thiomicrospira;uncultured bacterium
g_test	sp	JQ712411.1.1367	67.0263	4.26907e-15	5	6.46663e-05	6.32943e-05	2.15892e-06	0.000164688	0.000156685	0	0	Bacteria;Proteobacteria;Epsilonproteobacteria;Campylobacterales;Helicobacteraceae;Sulfurimonas;uncultured epsilon proteobacterium
g_test	sp	New.CleanUp.ReferenceOTU650884	66.3721	5.9625e-15	4	0	0	1.51124e-05	0.00035055	6.63605e-05	0	0.00064406	Bacteria;Bacteroidetes;Flavobacteriia;Flavobacteriales;Flavobacteriaceae
g_test	sp	AB842287.1.1428	65.8326	7.81786e-15	4	0.00014645	1.44673e-05	0	7.05806e-06	9.21674e-06	0	0	Bacteria;Proteobacteria;Epsilonproteobacteria;Campylobacterales;Helicobacteraceae;Sulfurovum;uncultured bacterium
g_test	sp	EU265970.1.1470	65.1852	1.06818e-14	6	0.000184489	0.000171799	0	0.000112929	4.79271e-05	1.8366e-06	1.61015e-05	Bacteria;Proteobacteria;Epsilonproteobacteria;Campylobacterales;Helicobacteraceae;Sulfurimonas;uncultured bacterium
g_test	sp	New.CleanUp.ReferenceOTU229444	64.3955	1.59003e-14	4	0	0	0	8.70494e-05	0.000226732	1.8366e-06	9.6609e-05	Bacteria;Proteobacteria;Deltaproteobacteria;Bdellovibrionales;Bdellovibrionaceae;OM27 clade;uncultured bacterium
g_test	sp	New.CleanUp.ReferenceOTU157005	61.8906	5.51825e-14	4	0.000157862	1.62757e-05	0	0.000167041	0.000108758	0	0	Bacteria;BD1-5
g_test	sp	EU050905.1.1397	61.755	5.89252e-14	4	3.8039e-06	1.80841e-06	0	0.000134103	0.000127191	0	0	Bacteria;Bacteroidetes;Flavobacteriia;Flavobacteriales;Cryomorphaceae;Crocinitomix;uncultured bacterium
g_test	sp	JQ712429.1.1383	60.0483	1.38234e-13	4	1.90195e-06	1.80841e-06	0	2.35269e-06	0.000215672	0	0	Bacteria;Bacteroidetes;Flavobacteriia;Flavobacteriales;NS9 marine group
g_test	sp	New.ReferenceOTU106	59.995	1.41598e-13	4	0.000163568	0.000108505	4.31784e-06	4.70537e-06	0	0	0	Bacteria;Proteobacteria;Epsilonproteobacteria;Campylobacterales;Helicobacteraceae;Sulfurovum;uncultured bacterium
g_test	sp	KC001528.1.1315	58.4287	3.09117e-13	4	1.90195e-06	1.80841e-06	0	1.41161e-05	0.000200925	0	0	Bacteria;Proteobacteria;Alphaproteobacteria;Rhodobacterales;Rhodobacteraceae
g_test	sp	New.ReferenceOTU1467	57.117	5.94279e-13	4	0.000116019	9.04205e-06	0	7.05806e-05	0.000224889	0	0	Bacteria;Bacteroidetes;Flavobacteriia;Flavobacteriales;Flavobacteriaceae;uncultured;uncultured Bacteroidetes bacterium
g_test	sp	FM179903.1.1493	56.9678	6.38827e-13	4	0	0	2.15892e-06	0.000228211	3.6867e-05	1.8366e-06	0	Bacteria;Proteobacteria;Gammaproteobacteria;Methylococcales;Marine Methylotrophic Group 2;uncultured bacterium;uncultured bacterium
g_test	sp	EU555124.1.1480	55.7311	1.18272e-12	5	1.90195e-06	3.61682e-06	2.37481e-05	1.64688e-05	0.000167745	0	0	Bacteria;Proteobacteria;Gammaproteobacteria;Thiotrichales;Thiotrichaceae;uncultured;uncultured bacterium
g_test	sp	New.CleanUp.ReferenceOTU829988	55.6123	1.25221e-12	4	1.33137e-05	0	6.47675e-06	0.000287028	1.10601e-05	0	0	Bacteria;Proteobacteria;Epsilonproteobacteria;Campylobacterales;Helicobacteraceae;Sulfurovum;uncultured bacterium
g_test	sp	AY355296.1.1417	55.3449	1.42813e-12	5	0.000144548	1.62757e-05	6.47675e-05	2.35269e-06	1.84335e-06	0	0	Bacteria;Proteobacteria;Epsilonproteobacteria;Nautiliales;Nautiliaceae;Nitratifractor;uncultured bacterium
g_test	sp	New.CleanUp.ReferenceOTU859632	52.5294	5.82287e-12	4	1.90195e-06	0	0	0.000244679	2.39635e-05	1.8366e-06	0	Bacteria;Proteobacteria;Epsilonproteobacteria;Campylobacterales;Helicobacteraceae;Sulfurovum;uncultured bacterium
g_test	sp	New.CleanUp.ReferenceOTU549037	50.9161	1.30153e-11	4	0.000135038	1.98925e-05	0	0.000190568	2.39635e-05	0	0	Unassigned
g_test	sp	KF545024.1.1481	50.4226	1.66199e-11	6	5.70585e-06	5.42523e-06	8.63567e-06	0.000242327	3.6867e-05	3.67321e-06	0	Bacteria;Proteobacteria;Epsilonproteobacteria;Campylobacterales;Helicobacteraceae;Sulfurovum;uncultured bacterium
g_test	sp	New.ReferenceOTU226	50.082	1.96606e-11	4	0.000116019	1.26589e-05	1.72713e-05	2.35269e-06	0	0	0	Bacteria;Proteobacteria;Epsilonproteobacteria;Nautiliales;Nautiliaceae;Caminibacter
g_test	sp	GQ848466.1.1517	49.7633	2.30046e-11	5	0.000106509	3.61682e-06	0	1.64688e-05	7.37339e-06	0	4.83045e-05	Bacteria;Proteobacteria;Gammaproteobacteria;Alteromonadales;Colwelliaceae;Colwellia;uncultured bacterium
g_test	sp	KF465246.1.1307	49.1111	3.18015e-11	4	0.000116019	1.80841e-05	2.15892e-06	1.64688e-05	0	0	0	Bacteria;Proteobacteria;Epsilonproteobacteria;Campylobacterales;Helicobacteraceae;Sulfurovum;uncultured bacterium
g_test	sp	HQ153979.1.1370	48.7019	3.89323e-11	5	0.000135038	0.000112121	1.07946e-05	2.35269e-06	1.65901e-05	0	0	Bacteria;Proteobacteria;Epsilonproteobacteria;Campylobacterales;Helicobacteraceae;Sulfurovum;uncultured bacterium
g_test	sp	JF495273.1.1400	48.1232	5.18795e-11	5	0.000127431	7.23364e-06	8.63567e-06	2.35269e-05	3.87103e-05	0	0	Bacteria;Proteobacteria;Epsilonproteobacteria;Campylobacterales;Helicobacteraceae;Sulfurovum;uncultured bacterium
g_test	sp	New.ReferenceOTU2187	47.999	5.50767e-11	5	9.31956e-05	1.80841e-06	0	7.05806e-06	1.29034e-05	0	0.000112711	Bacteria;Proteobacteria;Gammaproteobacteria;Alteromonadales;Colwelliaceae;Colwellia
g_test	sp	New.ReferenceOTU1354	47.4955	7.06845e-11	7	0.000152156	1.26589e-05	1.94303e-05	7.05806e-06	3.87103e-05	3.67321e-06	1.61015e-05	Bacteria;Proteobacteria;Epsilonproteobacteria;Campylobacterales;Helicobacteraceae;Sulfurovum;uncultured epsilon proteobacterium
g_test	sp	New.CleanUp.ReferenceOTU695425	46.8014	9.97902e-11	4	9.50975e-05	1.80841e-06	0	5.17591e-05	0.000195395	0	0	Bacteria;Bacteroidetes;Flavobacteriia;Flavobacteriales;Cryomorphaceae;Owenweeksia;uncultured bacterium
g_test	sp	New.CleanUp.ReferenceOTU1088457	46.1834	1.35611e-10	6	0.00016547	6.14859e-05	2.15892e-06	7.05806e-05	0.000200925	7.34642e-06	0	Bacteria;Proteobacteria;Gammaproteobacteria;Thiotrichales;Piscirickettsiaceae;Thiomicrospira;uncultured gamma proteobacterium
g_test	sp	New.CleanUp.ReferenceOTU342190	45.7696	1.66414e-10	4	1.33137e-05	0	4.31784e-06	0.000171746	6.63605e-05	0	0	Bacteria;Proteobacteria;Epsilonproteobacteria;Campylobacterales;Helicobacteraceae;Sulfurovum;uncultured epsilon proteobacterium
g_test	sp	EF218989.1.1378	45.3247	2.07401e-10	4	3.8039e-06	0	6.47675e-06	0.000162335	4.42404e-05	0	0	Bacteria;Proteobacteria;Epsilonproteobacteria;Campylobacterales;Helicobacteraceae;Sulfurovum;uncultured bacterium
g_test	sp	New.CleanUp.ReferenceOTU429020	45.2703	2.12645e-10	4	7.6078e-06	0	0	4.70537e-05	0.000228575	1.10196e-05	0	Bacteria;Proteobacteria;Deltaproteobacteria;Desulfobacterales;Desulfobulbaceae;Desulfobulbus;uncultured bacterium
g_test	sp	New.ReferenceOTU2526	44.2911	3.46197e-10	4	9.69995e-05	5.42523e-06	0	2.35269e-06	9.21674e-06	0	0	Bacteria;Proteobacteria;Epsilonproteobacteria;Campylobacterales;Helicobacteraceae;Sulfurovum;uncultured bacterium
g_test	sp	FR852934.1.922	43.3662	5.48543e-10	4	0.000119823	1.80841e-06	0.000105787	0	3.6867e-06	0	0	Archaea;Euryarchaeota;Thermoplasmata;Thermoplasmatales;Deep Sea Hydrothermal Vent Gp 2(DHVEG-2);uncultured archaeon;uncultured archaeon
g_test	sp	KC682627.1.1220	42.1139	1.02369e-09	6	3.04312e-05	9.40373e-05	0	4.70537e-06	9.21674e-06	1.8366e-06	0.000901684	Bacteria;Proteobacteria;Epsilonproteobacteria;Campylobacterales;Helicobacteraceae;Sulfurimonas;uncultured bacterium
g_test	sp	KF799071.1.1479	41.991	1.0862e-09	4	0.000116019	1.80841e-06	0	4.23484e-05	5.71438e-05	0	0	Bacteria;Bacteroidetes;Flavobacteriia;Flavobacteriales;Cryomorphaceae;Owenweeksia;uncultured bacterium
g_test	sp	FN562906.1.1359	41.467	1.40843e-09	4	7.6078e-06	0	0	1.41161e-05	0.000173275	0	3.2203e-05	Bacteria;Bacteroidetes;Flavobacteriia;Flavobacteriales;Flavobacteriaceae;uncultured Bacteroidetes bacterium;uncultured Bacteroidetes bacterium
g_test	sp	AF449243.1.1429	41.1405	1.65452e-09	5	9.50975e-06	9.04205e-06	3.67016e-05	6.82279e-05	8.4794e-05	0	0	Bacteria;Proteobacteria;Epsilonproteobacteria;Campylobacterales;Helicobacteraceae;Sulfurovum;uncultured epsilon proteobacterium
g_test	sp	DQ925875.1.1395	40.5928	2.17096e-09	4	3.8039e-06	0.000153715	2.15892e-06	0	1.84335e-06	0	0	Bacteria;Proteobacteria;Epsilonproteobacteria;Campylobacterales;Campylobacteraceae;Campylobacter;uncultured epsilon proteobacterium
g_test	sp	New.CleanUp.ReferenceOTU132971	40.3895	2.39804e-09	4	8.55878e-05	3.61682e-06	0	4.70537e-06	3.6867e-06	0	0	Bacteria;Proteobacteria;Gammaproteobacteria;Thiotrichales;Piscirickettsiaceae;Thiomicrospira;uncultured bacterium
g_test	sp	FJ001805.1.1397	40.3232	2.47345e-09	4	0.000112215	9.22289e-05	0	9.41075e-06	1.29034e-05	0	0	Bacteria;BD1-5;uncultured bacterium;uncultured bacterium;uncultured bacterium;uncultured bacterium;uncultured bacterium
g_test	sp	New.ReferenceOTU1794	38.8352	5.19348e-09	4	7.22741e-05	0.000267645	6.47675e-06	0	0	3.67321e-06	0	Bacteria;Proteobacteria;Epsilonproteobacteria;Nautiliales;Nautiliaceae;Caminibacter;uncultured bacterium
g_test	sp	New.CleanUp.ReferenceOTU366342	38.2606	6.90687e-09	4	0	0	0	6.58752e-05	0.000178805	1.8366e-06	0.000273726	Bacteria;Proteobacteria;Alphaproteobacteria;DB1-14;uncultured bacterium;uncultured bacterium;uncultured bacterium
g_test	sp	AY280413.1.1402	36.6235	1.5626e-08	5	2.47254e-05	0.000141056	0	7.29333e-05	3.13369e-05	3.67321e-06	0	Bacteria;BD1-5;uncultured bacterium;uncultured bacterium;uncultured bacterium;uncultured bacterium;uncultured bacterium
g_test	sp	New.CleanUp.ReferenceOTU774117	35.9192	2.21739e-08	4	9.12936e-05	1.80841e-06	0	2.58796e-05	1.65901e-05	0	0	Unassigned
g_test	sp	New.ReferenceOTU2000	34.4509	4.61029e-08	5	9.12936e-05	5.42523e-06	1.94303e-05	7.05806e-06	2.21202e-05	0	0	Bacteria;Proteobacteria;Epsilonproteobacteria;Campylobacterales;Helicobacteraceae;Sulfurovum;uncultured epsilon proteobacterium
g_test	sp	New.CleanUp.ReferenceOTU986809	34.3467	4.84653e-08	4	0.000116019	8.68037e-05	0	0	3.31803e-05	1.8366e-06	0	Bacteria;Proteobacteria;Epsilonproteobacteria;Campylobacterales;Helicobacteraceae;Sulfurimonas;uncultured bacterium
g_test	sp	FR853018.1.1522	34.2642	5.03968e-08	4	1.90195e-06	0	7.55621e-05	2.35269e-06	6.45172e-05	0	0	Bacteria;Proteobacteria;Deltaproteobacteria;Desulfobacterales;Desulfobacteraceae;SEEP-SRB1
g_test	sp	DQ009101.1.2103	34.194	5.20839e-08	4	0	1.80841e-06	0	4.70537e-06	7.37339e-05	0	0.000805075	Bacteria;Bacteroidetes;Flavobacteriia;Flavobacteriales;Flavobacteriaceae
g_test	sp	AY704397.1.1475	33.01	9.39492e-08	4	2.66273e-05	0	2.15892e-06	7.29333e-05	0.000112444	0	0	Bacteria;Proteobacteria;Epsilonproteobacteria;Campylobacterales;Helicobacteraceae;Sulfurimonas;uncultured epsilon proteobacterium
g_test	sp	New.ReferenceOTU1978	32.7624	1.06101e-07	5	3.8039e-06	1.80841e-06	6.47675e-06	6.35225e-05	7.55773e-05	0	0	Bacteria;Proteobacteria;Epsilonproteobacteria;Campylobacterales;Helicobacteraceae;Sulfurovum;uncultured bacterium
g_test	sp	AY225618.1.1425	32.2996	1.33445e-07	5	8.36858e-05	8.13784e-05	1.29535e-05	4.70537e-05	1.84335e-06	0	0	Bacteria;Proteobacteria;Epsilonproteobacteria;Campylobacterales;Helicobacteraceae;Sulfurovum;uncultured epsilon proteobacterium
g_test	sp	HQ691997.1.1360	31.3807	2.10815e-07	4	0	0	0	2.35269e-06	1.84335e-06	3.48955e-05	3.2203e-05	Bacteria;Proteobacteria;Alphaproteobacteria;Rickettsiales;Rickettsiaceae;Rickettsia
g_test	sp	AB440164.1.1430	31.1637	2.34482e-07	6	2.28234e-05	5.42523e-06	2.15892e-06	0.000169393	4.79271e-05	1.8366e-06	0	Bacteria;Proteobacteria;Epsilonproteobacteria;Campylobacterales;Helicobacteraceae;Sulfurovum;uncultured bacterium
g_test	sp	New.CleanUp.ReferenceOTU664922	31.0226	2.51089e-07	4	4.75488e-05	3.79766e-05	0	9.88128e-05	5.16138e-05	0	0	Bacteria;Bacteroidetes;Flavobacteriia;Flavobacteriales;Flavobacteriaceae
g_test	sp	New.CleanUp.ReferenceOTU766858	30.284	3.62471e-07	4	7.22741e-05	1.44673e-05	0	0.000134103	2.02768e-05	0	0	Bacteria;Bacteroidetes;Flavobacteriia;Flavobacteriales;Flavobacteriaceae
g_test	sp	AY531594.1.1459	29.8774	4.43262e-07	5	3.23332e-05	9.04205e-06	4.31784e-06	0.000167041	1.65901e-05	0	0	Bacteria;Proteobacteria;Epsilonproteobacteria;Campylobacterales;Helicobacteraceae;Sulfurovum;uncultured bacterium
g_test	sp	JQ712439.1.1383	28.9007	7.19327e-07	6	7.6078e-06	2.71261e-05	2.15892e-06	9.41075e-05	2.94936e-05	0	1.61015e-05	Bacteria;Proteobacteria;Epsilonproteobacteria;Campylobacterales;Helicobacteraceae;Sulfurimonas;uncultured bacterium
g_test	sp	JQ033738.1.1381	28.9007	7.19327e-07	4	6.84702e-05	3.61682e-06	0	1.64688e-05	1.84335e-06	0	0	Bacteria;Proteobacteria;Epsilonproteobacteria;Campylobacterales;Helicobacteraceae;Sulfurovum;uncultured epsilon proteobacterium
g_test	sp	GU235798.1.1298	28.8671	7.29983e-07	4	0	1.80841e-06	0	9.41075e-06	0.000125348	0	0.000579654	Bacteria;Proteobacteria;Alphaproteobacteria;Rhodobacterales;Rhodobacteraceae;Roseobacter clade NAC11-7 lineage
g_test	sp	AY225614.1.1436	28.6679	8.04727e-07	4	6.27644e-05	9.76541e-05	1.94303e-05	3.29376e-05	0	0	0	Bacteria;Proteobacteria;Epsilonproteobacteria;Campylobacterales;Helicobacteraceae;Sulfurovum;uncultured epsilon proteobacterium
g_test	sp	New.ReferenceOTU618	28.3296	9.51063e-07	4	1.71176e-05	5.42523e-06	0	0.000141161	2.58069e-05	0	0	Bacteria;Bacteroidetes;Flavobacteriia;Flavobacteriales;Cryomorphaceae;Fluviicola
g_test	sp	EF441910.1.1412	27.2279	1.64639e-06	5	0.000108411	5.42523e-06	0	0.000145867	3.6867e-06	3.67321e-06	0	Bacteria;Proteobacteria;Epsilonproteobacteria;Campylobacterales;Campylobacteraceae;Arcobacter;uncultured epsilon proteobacterium
g_test	sp	JQ712391.1.1392	26.9324	1.90457e-06	4	7.41761e-05	2.17009e-05	0	8.2344e-05	5.53005e-06	0	0	Bacteria;Proteobacteria;Epsilonproteobacteria;Campylobacterales;Campylobacteraceae;Arcobacter;uncultured epsilon proteobacterium
g_test	sp	New.CleanUp.ReferenceOTU26971	26.7805	2.05057e-06	4	7.41761e-05	3.25514e-05	6.26086e-05	0	1.84335e-06	0	0	Bacteria;BD1-5;uncultured bacterium;uncultured bacterium;uncultured bacterium;uncultured bacterium;uncultured bacterium
g_test	sp	M93356.1.1475	26.7412	2.08696e-06	5	4.18429e-05	0	3.02249e-05	0	6.08305e-05	8.63204e-05	0.000193218	Bacteria;Proteobacteria;Gammaproteobacteria;Oceanospirillales;Halomonadaceae;Halomonas;uncultured Halomonas sp,
g_test	sp	FJ535261.1.1343	26.7002	2.12576e-06	6	8.36858e-05	9.04205e-06	4.31784e-06	2.11742e-05	5.53005e-06	1.8366e-06	0	Bacteria;Proteobacteria;Epsilonproteobacteria;Campylobacterales;Helicobacteraceae;Sulfurovum;uncultured bacterium
g_test	sp	DQ228645.1.1439	26.6784	2.14459e-06	4	1.90195e-06	0	0	9.41075e-06	0.000108758	0	3.2203e-05	Bacteria;Bacteroidetes;Flavobacteriia;Flavobacteriales;Flavobacteriaceae;uncultured;uncultured bacterium
g_test	sp	New.ReferenceOTU2436	26.0373	2.9489e-06	4	6.27644e-05	1.08505e-05	4.31784e-06	4.70537e-06	0	0	0	Bacteria;Proteobacteria;Epsilonproteobacteria;Campylobacterales;Campylobacteraceae;Thiofractor;uncultured bacterium
g_test	sp	HQ673054.1.1483	25.8529	3.22721e-06	4	6.65683e-05	1.62757e-05	0	3.05849e-05	6.82039e-05	0	0	Bacteria;Bacteroidetes;Flavobacteriia;Flavobacteriales;Cryomorphaceae;Fluviicola
g_test	sp	AY531597.1.1476	25.833	3.2527e-06	5	6.08624e-05	7.23364e-06	5.1814e-05	6.58752e-05	1.84335e-05	0	0	Bacteria;Proteobacteria;Epsilonproteobacteria;Campylobacterales;Helicobacteraceae;Sulfurovum;uncultured bacterium
g_test	sp	GQ901061.1.1314	25.2645	4.31336e-06	5	0	9.04205e-06	2.15892e-06	0	4.97704e-05	5.69347e-05	0.000161015	Bacteria;Proteobacteria;Gammaproteobacteria;Alteromonadales;Idiomarinaceae;Idiomarina
g_test	sp	AF420352.1.1472	24.6871	5.74503e-06	4	5.70585e-06	6.14859e-05	0	3.52903e-05	1.84335e-05	0	0	Bacteria;Proteobacteria;Epsilonproteobacteria;Campylobacterales;Helicobacteraceae;Sulfurimonas;uncultured bacterium
g_test	sp	New.ReferenceOTU360	24.546	6.15257e-06	5	8.36858e-05	3.61682e-06	0	9.88128e-05	0.000151155	7.34642e-06	0	Bacteria;Proteobacteria;Gammaproteobacteria;Thiotrichales;Piscirickettsiaceae;Thiomicrospira;uncultured gamma proteobacterium
g_test	sp	AJ441209.1.1426	23.6478	9.6209e-06	5	5.89605e-05	3.61682e-06	2.15892e-06	0.000105871	1.65901e-05	0	0	Bacteria;Proteobacteria;Epsilonproteobacteria;Campylobacterales;Helicobacteraceae;Sulfurovum;uncultured bacterium
g_test	sp	New.CleanUp.ReferenceOTU999189	23.4436	1.06334e-05	4	1.90195e-06	0	0	3.29376e-05	5.53005e-05	0	0.00053135	Bacteria;Bacteroidetes;Cytophagia;Cytophagales;Flammeovirgaceae;Reichenbachiella;uncultured bacterium
g_test	sp	New.CleanUp.ReferenceOTU495270	23.0847	1.26977e-05	4	5.89605e-05	1.44673e-05	8.63567e-06	2.35269e-06	0	0	0	Bacteria;Proteobacteria;Epsilonproteobacteria;Campylobacterales;Helicobacteraceae;Sulfurovum
g_test	sp	GU220741.1.1462	22.7942	1.46533e-05	5	1.33137e-05	1.26589e-05	4.96551e-05	6.35225e-05	9.21674e-06	0	0	Bacteria;Proteobacteria;Epsilonproteobacteria;Campylobacterales;Helicobacteraceae;Sulfurimonas;uncultured bacterium
g_test	sp	HE610326.1.1515	22.7873	1.46744e-05	4	6.84702e-05	0	0	9.64601e-05	6.63605e-05	1.8366e-06	0	Bacteria;Fusobacteria;Fusobacteriia;Fusobacteriales;Fusobacteriaceae;Psychrilyobacter
g_test	sp	New.CleanUp.ReferenceOTU492076	22.3177	1.85208e-05	4	5.70585e-05	1.44673e-05	0	5.17591e-05	4.05537e-05	0	0	Bacteria;Bacteroidetes;Flavobacteriia;Flavobacteriales;Cryomorphaceae;Owenweeksia;uncultured bacterium
g_test	sp	New.CleanUp.ReferenceOTU514357	22.225	1.93604e-05	5	3.8039e-05	1.80841e-06	0.000125217	7.05806e-06	5.53005e-06	0	0	Bacteria;Proteobacteria;Epsilonproteobacteria;Campylobacterales;Helicobacteraceae;Sulfurovum;uncultured bacterium
g_test	sp	FJ628247.1.1501	22.1494	2.00652e-05	5	3.8039e-06	0	0	0.000167041	2.02768e-05	5.50981e-06	4.83045e-05	Bacteria;Proteobacteria;Gammaproteobacteria;Oceanospirillales;SUP05 cluster;uncultured gamma proteobacterium;uncultured gamma proteobacterium
g_test	sp	New.ReferenceOTU805	22.0886	2.06431e-05	4	1.90195e-06	1.80841e-05	0	4.4701e-05	3.50236e-05	0	0	Bacteria;Proteobacteria;Gammaproteobacteria;Thiotrichales;Piscirickettsiaceae;Thiomicrospira;uncultured gamma proteobacterium
g_test	sp	New.ReferenceOTU1147	21.3555	2.97236e-05	4	9.50975e-06	1.80841e-06	0	9.41075e-05	2.76502e-05	0	0	Bacteria;Bacteroidetes;Flavobacteriia;Flavobacteriales;Flavobacteriaceae;Lutibacter;uncultured bacterium
g_test	sp	New.CleanUp.ReferenceOTU29644	20.9452	3.64197e-05	4	3.8039e-06	0	0	6.11698e-05	6.08305e-05	1.8366e-06	0	Bacteria;Proteobacteria;Alphaproteobacteria;Rhodobacterales;Rhodobacteraceae
g_test	sp	New.ReferenceOTU993	20.8319	3.8466e-05	4	8.93917e-05	0.000155523	0	0	0	5.50981e-06	1.61015e-05	Bacteria;Proteobacteria;Epsilonproteobacteria;Nautiliales;Nautiliaceae;Caminibacter;uncultured bacterium
g_test	sp	New.ReferenceOTU2219	20.8179	3.86591e-05	5	1.52156e-05	1.80841e-06	0	9.41075e-06	0.000184335	1.46928e-05	0	Bacteria;Proteobacteria;Gammaproteobacteria;Thiotrichales;Piscirickettsiaceae;Thiomicrospira;uncultured gamma proteobacterium
g_test	sp	AF420351.1.1472	20.6458	4.20505e-05	4	0	0	2.80659e-05	5.88172e-05	3.87103e-05	0	0.000144914	Bacteria;Proteobacteria;Epsilonproteobacteria;Campylobacterales;Helicobacteraceae;Sulfurovum;uncultured bacterium
g_test	sp	New.CleanUp.ReferenceOTU522366	20.6394	4.21017e-05	4	0	0	0	9.41075e-06	6.82039e-05	3.30589e-05	1.61015e-05	Bacteria;Verrucomicrobia;Verrucomicrobiae;Verrucomicrobiales;DEV007;uncultured bacterium;uncultured bacterium
g_test	sp	New.CleanUp.ReferenceOTU836964	20.5178	4.46511e-05	4	1.90195e-06	1.80841e-06	0	8.2344e-05	1.65901e-05	0	0	Bacteria;Proteobacteria;Epsilonproteobacteria;Campylobacterales;Helicobacteraceae;Sulfurimonas
g_test	sp	JN662291.1.1312	20.4636	4.57887e-05	5	4.56468e-05	1.80841e-06	2.15892e-06	2.35269e-06	1.84335e-06	0	0	Bacteria;Proteobacteria;Epsilonproteobacteria;Campylobacterales;Helicobacteraceae;Sulfurovum;uncultured bacterium
g_test	sp	New.CleanUp.ReferenceOTU380517	20.195	5.22678e-05	4	5.70585e-05	9.04205e-06	0	2.58796e-05	2.39635e-05	0	0	Bacteria;Proteobacteria;Gammaproteobacteria;Thiotrichales;Piscirickettsiaceae;Thiomicrospira;uncultured gamma proteobacterium
g_test	sp	EU265791.1.1505	19.9604	5.86556e-05	4	3.8039e-06	0	2.15892e-06	6.11698e-05	3.6867e-05	0	0	Bacteria;Proteobacteria;Gammaproteobacteria;Thiotrichales;Thiotrichaceae;uncultured;uncultured bacterium
g_test	sp	JQ712377.1.1376	19.9517	5.87974e-05	5	4.75488e-05	3.61682e-05	1.94303e-05	4.4701e-05	5.53005e-06	0	0	Bacteria;Proteobacteria;Epsilonproteobacteria;Campylobacterales;Helicobacteraceae;Sulfurovum;uncultured epsilon proteobacterium
g_test	sp	JQ712385.1.1383	19.4583	7.51012e-05	4	3.8039e-06	1.08505e-05	0	8.94021e-05	3.6867e-06	0	0	Bacteria;Proteobacteria;Epsilonproteobacteria;Campylobacterales;Helicobacteraceae;Sulfurimonas;uncultured bacterium
g_test	sp	AF354608.1.1499	19.2914	8.1478e-05	4	5.70585e-06	1.80841e-06	0	3.05849e-05	6.26739e-05	0	0	Bacteria;Proteobacteria;Gammaproteobacteria;Thiotrichales;Piscirickettsiaceae;Thiomicrospira;uncultured gamma proteobacterium
g_test	sp	FN562884.1.1223	18.8079	0.000103557	4	5.70585e-06	5.24439e-05	0	2.35269e-05	1.47468e-05	0	0	Bacteria;BD1-5;uncultured bacterium;uncultured bacterium;uncultured bacterium;uncultured bacterium;uncultured bacterium
g_test	sp	New.CleanUp.ReferenceOTU999629	18.7043	0.000108855	4	0	0	0	6.11698e-05	6.08305e-05	5.50981e-06	1.61015e-05	Bacteria;Proteobacteria;Alphaproteobacteria;Rhodobacterales;Rhodobacteraceae;Ruegeria
g_test	sp	New.CleanUp.ReferenceOTU396210	18.5153	0.000119408	4	2.28234e-05	1.80841e-06	0	5.64645e-05	5.53005e-05	0	0	Bacteria;Proteobacteria;Gammaproteobacteria;Thiotrichales;Piscirickettsiaceae;Thiomicrospira;uncultured gamma proteobacterium
g_test	sp	AJ441203.1.1422	18.1759	0.000141223	6	5.70585e-06	3.25514e-05	7.7721e-05	2.35269e-06	1.29034e-05	3.67321e-06	0	Bacteria;Proteobacteria;Epsilonproteobacteria;Campylobacterales;Helicobacteraceae;Sulfurovum;uncultured epsilon proteobacterium
g_test	sp	New.CleanUp.ReferenceOTU528763	17.9584	0.00015714	4	0	1.80841e-06	8.85156e-05	2.35269e-06	0	1.8366e-06	0	Bacteria;Proteobacteria;Epsilonproteobacteria;Nautiliales;Nautiliaceae;Nitratifractor;uncultured bacterium
g_test	sp	AB476174.1.1430	17.9132	0.000160423	5	1.90195e-06	1.80841e-06	4.31784e-06	7.76387e-05	7.37339e-06	0	0	Bacteria;Proteobacteria;Epsilonproteobacteria;Campylobacterales;Helicobacteraceae;Sulfurovum;uncultured bacterium
g_test	sp	FR852967.1.1523	17.831	0.000166834	4	4.94507e-05	0	6.69265e-05	4.70537e-06	1.84335e-06	0	0	Bacteria;Proteobacteria;Deltaproteobacteria;Desulfobacterales;Desulfobulbaceae;Desulfobulbus;uncultured bacterium
g_test	sp	New.CleanUp.ReferenceOTU22109	17.6521	0.000182094	4	4.56468e-05	9.04205e-06	0	6.82279e-05	1.29034e-05	0	0	Bacteria;Proteobacteria;Epsilonproteobacteria;Campylobacterales;Helicobacteraceae;Sulfurovum;uncultured bacterium
g_test	sp	JQ712421.1.1380	16.8148	0.000276233	5	6.46663e-05	4.52102e-05	1.07946e-05	0	9.21674e-06	1.8366e-06	0	Bacteria;Proteobacteria;Epsilonproteobacteria;Campylobacterales;Helicobacteraceae;Sulfurovum;uncultured epsilon proteobacterium
g_test	sp	New.CleanUp.ReferenceOTU194132	16.3036	0.000355994	4	2.85293e-05	1.80841e-06	0	9.41075e-05	1.29034e-05	0	0	Bacteria;Bacteroidetes;Flavobacteriia;Flavobacteriales;Flavobacteriaceae;Lutibacter;uncultured bacterium
g_test	sp	JQ032048.1.1222	16.2952	0.000356824	4	0	0	2.15892e-06	0	9.21674e-06	2.38759e-05	3.2203e-05	Bacteria;Proteobacteria;Gammaproteobacteria;Alteromonadales;Idiomarinaceae;Idiomarina
g_test	sp	New.CleanUp.ReferenceOTU927414	16.1542	0.00038214	6	4.75488e-05	7.23364e-06	2.15892e-06	0.000103518	2.39635e-05	1.8366e-06	0	Bacteria;Proteobacteria;Gammaproteobacteria;Thiotrichales;Piscirickettsiaceae;Thiomicrospira;uncultured bacterium
g_test	sp	GU369923.1.1384	15.8441	0.00044539	4	1.90195e-06	0	6.47675e-06	5.64645e-05	1.65901e-05	0	0	Bacteria;Proteobacteria;Epsilonproteobacteria;Campylobacterales;Helicobacteraceae;Sulfurovum;uncultured epsilon proteobacterium
g_test	sp	New.CleanUp.ReferenceOTU367834	15.4834	0.000532395	4	3.61371e-05	0	2.15892e-06	2.35269e-06	3.6867e-06	0	0	Bacteria;Proteobacteria;Epsilonproteobacteria;Campylobacterales;Helicobacteraceae;Sulfurimonas;uncultured bacterium
g_test	sp	New.CleanUp.ReferenceOTU329652	15.3899	0.000556843	4	4.37449e-05	3.25514e-05	2.15892e-06	2.35269e-06	0	0	0	Bacteria;Proteobacteria;Epsilonproteobacteria;Campylobacterales;Helicobacteraceae;Sulfurimonas;uncultured bacterium
g_test	sp	AB842296.1.1433	15.3449	0.000568418	4	4.18429e-05	3.61682e-06	0	6.11698e-05	7.37339e-06	0	0	Bacteria;Proteobacteria;Epsilonproteobacteria;Campylobacterales;Helicobacteraceae;Sulfurovum;uncultured bacterium
g_test	sp	FJ712477.1.1480	15.1365	0.000629646	5	4.18429e-05	1.08505e-05	4.31784e-06	7.05806e-06	5.53005e-06	0	0	Bacteria;Proteobacteria;Epsilonproteobacteria;Campylobacterales;Helicobacteraceae;Sulfurovum;uncultured bacterium
g_test	sp	New.CleanUp.ReferenceOTU865726	14.2344	0.000986663	6	4.18429e-05	5.42523e-06	2.15892e-06	4.4701e-05	6.26739e-05	1.8366e-06	0	Bacteria;Proteobacteria;Gammaproteobacteria;Thiotrichales;Piscirickettsiaceae;Thiomicrospira;uncultured gamma proteobacterium
g_test	sp	New.CleanUp.ReferenceOTU1114162	13.6628	0.00131063	4	3.8039e-05	1.80841e-05	0	4.70537e-06	1.84335e-06	0	0	Bacteria;Proteobacteria;Epsilonproteobacteria;Campylobacterales;Helicobacteraceae;Sulfurimonas;uncultured bacterium
g_test	sp	JF738106.1.1522	13.4981	0.00142045	4	0	1.80841e-06	2.15892e-06	3.99957e-05	1.47468e-05	0	0	Bacteria;Proteobacteria;Zetaproteobacteria;Mariprofundales;Mariprofundaceae;Mariprofundus;uncultured bacterium
g_test	sp	New.CleanUp.ReferenceOTU951997	13.4462	0.00145507	4	3.8039e-05	7.23364e-06	0	1.64688e-05	7.37339e-06	0	0	Bacteria;Proteobacteria;Gammaproteobacteria;Thiotrichales;Piscirickettsiaceae;Thiomicrospira;uncultured gamma proteobacterium
g_test	sp	AY531600.1.1460	13.2469	0.00160456	4	3.42351e-05	7.23364e-06	2.15892e-06	4.70537e-06	0	0	0	Bacteria;Proteobacteria;Epsilonproteobacteria;Campylobacterales;Helicobacteraceae;Sulfurovum;uncultured epsilon proteobacterium
g_test	sp	EF667896.1.1460	13.1913	0.00164667	4	0	0	0	7.05806e-06	1.29034e-05	2.75491e-05	9.6609e-05	Bacteria;Proteobacteria;Alphaproteobacteria;Rickettsiales;Rickettsiaceae;Rickettsia
g_test	sp	KC682649.1.1451	13.133	0.00169223	5	5.70585e-06	1.80841e-05	1.51124e-05	3.99957e-05	1.84335e-06	0	0	Bacteria;Proteobacteria;Epsilonproteobacteria;Campylobacterales;Helicobacteraceae;Sulfurovum;uncultured epsilon proteobacterium
g_test	sp	New.CleanUp.ReferenceOTU1129217	12.8154	0.0019798	4	3.61371e-05	3.61682e-06	0	4.23484e-05	7.37339e-06	0	0	Bacteria;Bacteroidetes;Flavobacteriia;Flavobacteriales;Flavobacteriaceae;Lutibacter;uncultured bacterium
g_test	sp	New.CleanUp.ReferenceOTU93138	12.2617	0.00260649	4	1.90195e-06	0	0	2.11742e-05	5.16138e-05	1.8366e-06	0	Unassigned
g_test	sp	GQ345764.1.1378	11.8687	0.00316646	6	1.90195e-06	0	2.15892e-06	1.88215e-05	2.94936e-05	2.38759e-05	1.61015e-05	Bacteria;Proteobacteria;Gammaproteobacteria;Oceanospirillales;SUP05 cluster;uncultured gamma proteobacterium;uncultured gamma proteobacterium
g_test	sp	New.CleanUp.ReferenceOTU596325	11.5485	0.00370943	4	1.52156e-05	2.35093e-05	0	4.4701e-05	5.53005e-06	0	0	Bacteria;Proteobacteria;Gammaproteobacteria;Thiotrichales;Piscirickettsiaceae;Thiomicrospira
g_test	sp	FR852995.1.1476	11.4057	0.00397665	5	3.23332e-05	3.61682e-06	2.15892e-06	4.70537e-06	1.29034e-05	0	0	Bacteria;Proteobacteria;Epsilonproteobacteria;Campylobacterales;Helicobacteraceae;Sulfurovum;uncultured bacterium
g_test	sp	AY280434.1.1402	11.3093	0.00416525	4	5.70585e-06	4.34018e-05	1.29535e-05	0	1.84335e-06	0	0	Bacteria;Proteobacteria;Epsilonproteobacteria;Campylobacterales;Campylobacteraceae;Campylobacter;uncultured epsilon proteobacterium
g_test	sp	New.ReferenceOTU2588	11.2178	0.00435233	4	1.71176e-05	4.88271e-05	0	1.41161e-05	1.84335e-06	0	0	Bacteria;Proteobacteria;Epsilonproteobacteria;Campylobacterales;Helicobacteraceae;Sulfurovum;uncultured bacterium
g_test	sp	New.ReferenceOTU2030	11.1964	0.00439099	4	1.52156e-05	1.80841e-06	0	4.23484e-05	2.76502e-05	0	0	Bacteria;Proteobacteria;Epsilonproteobacteria;Campylobacterales;Helicobacteraceae;Sulfurovum
g_test	sp	New.ReferenceOTU2182	11.0435	0.00472261	5	2.66273e-05	1.80841e-06	2.15892e-06	2.35269e-05	3.13369e-05	0	0	Bacteria;Proteobacteria;Gammaproteobacteria;Thiotrichales;Piscirickettsiaceae;Thiomicrospira;uncultured gamma proteobacterium
g_test	sp	DQ228650.1.1452	11.0435	0.00472261	4	2.66273e-05	2.89346e-05	0	2.11742e-05	7.37339e-06	0	0	Bacteria;Proteobacteria;Epsilonproteobacteria;Campylobacterales;Helicobacteraceae;Sulfurimonas;uncultured bacterium
g_test	sp	AJ441205.1.1430	11.0161	0.00477896	4	3.04312e-05	1.80841e-06	1.07946e-05	7.05806e-06	0	0	0	Bacteria;Proteobacteria;Epsilonproteobacteria;Campylobacterales;Helicobacteraceae;Sulfurovum;uncultured bacterium
g_test	sp	New.CleanUp.ReferenceOTU180193	10.8761	0.00511614	4	2.09215e-05	5.42523e-06	0	2.35269e-05	3.50236e-05	0	0	Bacteria;Proteobacteria
g_test	sp	New.CleanUp.ReferenceOTU575995	10.45	0.00631938	4	2.47254e-05	3.61682e-06	0	1.64688e-05	3.50236e-05	0	0	Bacteria;Proteobacteria;Gammaproteobacteria;Thiotrichales;Piscirickettsiaceae;Thiomicrospira;uncultured gamma proteobacterium
g_test	sp	New.CleanUp.ReferenceOTU260090	9.9524	0.00808993	4	2.85293e-05	5.42523e-06	0	7.05806e-06	9.21674e-06	0	0	Bacteria;Proteobacteria;Gammaproteobacteria;Thiotrichales;Piscirickettsiaceae;Thiomicrospira;uncultured gamma proteobacterium
g_test	sp	FN562827.1.1352	9.8799	0.00837337	5	2.85293e-05	7.23364e-06	4.31784e-06	1.17634e-05	1.84335e-06	0	0	Bacteria;Proteobacteria;Epsilonproteobacteria;Campylobacterales;Helicobacteraceae;Sulfurovum;uncultured epsilon proteobacterium
g_test	sp	New.CleanUp.ReferenceOTU1134356	9.78834	0.00874974	4	3.42351e-05	5.42523e-06	4.31784e-06	0	0	1.8366e-06	0	Bacteria;Proteobacteria;Epsilonproteobacteria;Nautiliales;Nautiliaceae;Nitratifractor;uncultured bacterium
g_test	sp	New.CleanUp.ReferenceOTU579852	9.29797	0.0111547	4	3.8039e-05	0	0	4.70537e-06	1.65901e-05	1.8366e-06	0	Bacteria;Bacteroidetes;Sphingobacteriia;Sphingobacteriales;Saprospiraceae;uncultured
g_test	sp	DQ395997.1.1462	9.29545	0.0111547	5	3.8039e-06	0	6.47675e-06	0	7.37339e-06	2.02027e-05	4.83045e-05	Bacteria;Proteobacteria;Alphaproteobacteria;Sphingomonadales;Erythrobacteraceae;Altererythrobacter;uncultured bacterium
g_test	sp	FN554146.1.1471	9.14527	0.0120029	4	2.66273e-05	1.62757e-05	0	4.70537e-06	1.84335e-06	0	0	Bacteria;Proteobacteria;Epsilonproteobacteria;Campylobacterales;Helicobacteraceae;Sulfurimonas;uncultured bacterium
g_test	sp	New.CleanUp.ReferenceOTU853745	9.12299	0.0121156	4	2.66273e-05	3.61682e-06	2.15892e-06	2.35269e-05	0	0	0	Bacteria;Proteobacteria;Epsilonproteobacteria;Campylobacterales;Helicobacteraceae;Sulfurovum;uncultured epsilon proteobacterium
g_test	sp	GQ337231.1.1435	9.10768	0.0121868	4	0	0	2.15892e-06	0	9.21674e-06	1.46928e-05	1.61015e-05	Bacteria;Proteobacteria;Alphaproteobacteria;SAR11 clade;Surface 1;uncultured bacterium;uncultured bacterium
g_test	sp	AM990660.1.1353	8.75188	0.0145336	5	1.90195e-06	0	2.15892e-06	0	2.02768e-05	2.20393e-05	6.4406e-05	Bacteria;Bacteroidetes;Flavobacteriia;Flavobacteriales;Flavobacteriaceae;Mesonia
g_test	sp	AY726843.1.1232	8.74227	0.0145776	7	5.70585e-06	1.44673e-05	4.31784e-06	4.70537e-06	4.05537e-05	3.12223e-05	8.05075e-05	Bacteria;Proteobacteria;Gammaproteobacteria;Alteromonadales;Alteromonadaceae;Alteromonas
g_test	sp	JQ287427.1.1435	8.43244	0.0169898	4	1.14117e-05	1.44673e-05	0	9.41075e-06	2.58069e-05	0	0	Bacteria;BD1-5;uncultured bacterium;uncultured bacterium;uncultured bacterium;uncultured bacterium;uncultured bacterium
g_test	sp	New.ReferenceOTU494	8.26984	0.0183959	4	3.8039e-05	1.44673e-05	2.37481e-05	0	0	1.8366e-06	0	Bacteria;BD1-5;uncultured bacterium;uncultured bacterium;uncultured bacterium;uncultured bacterium;uncultured bacterium
g_test	sp	New.CleanUp.ReferenceOTU654657	7.95314	0.021514	7	3.9941e-05	1.80841e-06	1.29535e-05	7.05806e-06	5.53005e-06	3.67321e-06	1.61015e-05	Bacteria;Proteobacteria;Epsilonproteobacteria;Campylobacterales;Helicobacteraceae;Sulfurovum;uncultured epsilon proteobacterium
g_test	sp	JN662200.1.1387	7.82644	0.0228803	4	2.28234e-05	1.80841e-06	1.29535e-05	4.70537e-06	0	0	0	Bacteria;Proteobacteria;Epsilonproteobacteria;Campylobacterales;Helicobacteraceae;Sulfurovum;uncultured bacterium
g_test	sp	New.ReferenceOTU2587	7.82072	0.0229053	4	1.33137e-05	1.80841e-06	0	5.17591e-05	1.84335e-06	0	0	Bacteria;Proteobacteria;Epsilonproteobacteria;Campylobacterales;Helicobacteraceae;Sulfurovum;uncultured bacterium
g_test	sp	FJ497539.1.1445	7.53334	0.026398	4	0	5.42523e-06	2.15892e-06	2.58796e-05	1.84335e-06	0	0	Bacteria;Proteobacteria;Epsilonproteobacteria;Campylobacterales;Helicobacteraceae;Sulfurimonas;uncultured epsilon proteobacterium
g_test	sp	New.CleanUp.ReferenceOTU887460	7.42091	0.0278753	4	1.52156e-05	0	2.15892e-06	1.41161e-05	2.76502e-05	0	0	Bacteria;Proteobacteria;Gammaproteobacteria;Thiotrichales;Piscirickettsiaceae;Thiomicrospira;uncultured gamma proteobacterium
g_test	sp	New.CleanUp.ReferenceOTU1058636	7.41016	0.0279761	4	1.14117e-05	9.04205e-06	0	2.82322e-05	1.10601e-05	0	0	Bacteria;Proteobacteria;Gammaproteobacteria;Thiotrichales;Piscirickettsiaceae;Thiomicrospira;uncultured gamma proteobacterium
g_test	sp	JN662225.1.1386	7.2123	0.0308311	4	1.33137e-05	1.80841e-06	0	3.29376e-05	1.29034e-05	0	0	Bacteria;Proteobacteria;Epsilonproteobacteria;Campylobacterales;Helicobacteraceae;Sulfurovum;uncultured epsilon proteobacterium
g_test	sp	New.CleanUp.ReferenceOTU297134	7.08361	0.0328225	5	5.70585e-06	0	2.15892e-06	3.7643e-05	9.21674e-06	0	4.83045e-05	Bacteria;Bacteroidetes;Flavobacteriia;Flavobacteriales;Cryomorphaceae;Fluviicola;uncultured bacterium
g_test	sp	New.ReferenceOTU1930	6.91912	0.0355737	5	2.85293e-05	3.61682e-06	0	3.99957e-05	7.55773e-05	7.34642e-06	0	Bacteria;Proteobacteria;Gammaproteobacteria;Thiotrichales;Piscirickettsiaceae;Thiomicrospira;uncultured gamma proteobacterium
g_test	sp	New.CleanUp.ReferenceOTU631736	6.45488	0.0447896	4	1.14117e-05	5.42523e-06	0	1.41161e-05	2.02768e-05	0	0	Bacteria;Proteobacteria;Epsilonproteobacteria;Campylobacterales;Helicobacteraceae;Sulfurimonas;uncultured bacterium
g_test	sp	New.CleanUp.ReferenceOTU178098	6.42529	0.0453778	4	0	0	0	2.35269e-06	2.02768e-05	1.28562e-05	1.61015e-05	Bacteria;Verrucomicrobia;Verrucomicrobiae;Verrucomicrobiales;DEV007;uncultured bacterium;uncultured bacterium
g_test	sp	AB697031.1.1407	6.34902	0.0470597	4	1.90195e-06	9.04205e-06	0	2.58796e-05	1.84335e-06	0	0	Bacteria;Proteobacteria;Epsilonproteobacteria;Campylobacterales;Helicobacteraceae;Sulfurimonas
g_test	sp	New.CleanUp.ReferenceOTU275937	6.28882	0.0484133	4	2.85293e-05	9.04205e-06	0	7.05806e-06	0	1.8366e-06	0	Bacteria;Proteobacteria;Epsilonproteobacteria;Campylobacterales;Helicobacteraceae;Sulfurovum;uncultured bacterium
g_test	sp	KF859552.1.1495	6.24449	0.0494124	6	3.8039e-06	0	8.63567e-06	2.35269e-06	3.87103e-05	2.57125e-05	9.6609e-05	Bacteria;Proteobacteria;Gammaproteobacteria;Oceanospirillales;Halomonadaceae;Halomonas;uncultured Halomonas sp,
sp=sphalerite (ZnS)

## Sheet: Arc ccp
Supplementary Table S6: significant differences between counts in distinct bacterial and archaeal groups found in relation to mineralogy.
						active chimneys			inactive chimneys
Test	Variable	#OTU ID	Test-Statistic	FDR_P	n_sites	AS5	AS6	AS8	AS7	AS1	AS4	taxonomy
g_test	ccp	FJ487519.1.1341	366268	0	4	0	2.47696e-06	7.19512e-06	0	0.058395	0.928792	Archaea; Thaumarchaeota; Marine Group I; Unknown Order; Unknown Family; Candidatus Nitrosopumilus; Ambiguous_taxa
g_test	ccp	AB095131.1.1049	236480	0	5	0.549196	0.358953	0.0489988	0.000788693	0.00130826	0	Archaea; Euryarchaeota; Archaeoglobi; Archaeoglobales; Archaeoglobaceae; uncultured
g_test	ccp	New.ReferenceOTU2259	197154	0	6	0.000350998	0.000156048	0.000194268	0.574293	0.144796	1.31999e-05	Unassigned
g_test	ccp	FR852956.1.939	89884.4	0	5	0.00190785	0.333545	0.226636	0.00320223	0.0208836	0	Archaea; Crenarchaeota; Thermoprotei; Desulfurococcales; Desulfurococcaceae; uncultured; uncultured archaeon
g_test	ccp	AB980092.1.1440	77610.2	0	6	0.00013587	5.44931e-05	7.91464e-05	0.239281	0.00941621	2.63998e-06	Bacteria; Actinobacteria; Acidimicrobiia; Acidimicrobiales; uncultured; uncultured bacterium; uncultured bacterium
g_test	ccp	JX507278.1.921	62769.3	0	5	0.0836055	0.000428514	0.000625976	4.97171e-05	0.000880246	0	Archaea; Euryarchaeota; Thermoplasmata; Thermoplasmatales; Deep Sea Hydrothermal Vent Gp 2(DHVEG-2); Ambiguous_taxa; Ambiguous_taxa
g_test	ccp	New.ReferenceOTU2803	45886	0	5	0.0594433	5.20161e-05	2.87805e-05	1.58191e-05	2.4227e-05	0	Unassigned
g_test	ccp	JQ678255.1.951	40423.5	0	5	0.067386	0.149232	0.00432427	0.00016949	3.23026e-05	0	Archaea; Euryarchaeota; Thermococci; Thermococcales; Thermococcaceae; Thermococcus; uncultured archaeon
g_test	ccp	New.ReferenceOTU1975	37703.8	0	4	0.048769	2.97235e-05	1.07927e-05	1.58191e-05	0	0	Archaea; Woesearchaeota (DHVEG-6); Ambiguous_taxa; Ambiguous_taxa; Ambiguous_taxa; Ambiguous_taxa; Ambiguous_taxa
g_test	ccp	New.ReferenceOTU812	25327.4	0	5	4.81207e-05	2.22926e-05	7.19512e-06	0.0693734	0.0345396	0	Unassigned
g_test	ccp	New.ReferenceOTU2137	23622.9	0	4	0	0	3.59756e-06	0.000772874	0.258251	1.58399e-05	Unassigned
g_test	ccp	FJ150826.1.1353	22784.2	0	4	2.83063e-06	0	0	2.25987e-06	0.00376325	0.0579132	Archaea; Thaumarchaeota; Marine Group I; Unknown Order; Unknown Family; Candidatus Nitrosopumilus; Ambiguous_taxa
g_test	ccp	FR852947.1.923	17808.7	0	5	0.0299085	0.00280887	0.00107927	0.00016497	0.00451429	0	Archaea; Euryarchaeota; Thermococci; Thermococcales; Thermococcaceae; Thermococcus
g_test	ccp	AB095117.1.953	16708.2	0	5	8.4919e-05	0.00139453	0.0924322	0.000237286	0.000331102	0	Archaea; Euryarchaeota; Methanococci; Methanococcales; Methanocaldococcaceae; Methanocaldococcus; Ambiguous_taxa
g_test	ccp	New.ReferenceOTU1646	15182.9	0	5	0.000251926	7.43087e-06	0.0784269	2.25987e-05	3.23026e-05	0	Unassigned
g_test	ccp	FR852950.1.924	12322.6	0	5	0.0277034	0.000795104	0.0391739	0.000244066	0.00533801	0	Archaea; Euryarchaeota; Thermoplasmata; Thermoplasmatales; Deep Sea Hydrothermal Vent Gp 2(DHVEG-2); uncultured archaeon; uncultured archaeon
g_test	ccp	DQ082935.1.1036	11879.9	0	5	0.0158176	2.47696e-06	3.59756e-06	0.000122033	0.000524917	0	Archaea; Euryarchaeota; Thermoplasmata; Thermoplasmatales; AMOS1A-4113-D04; uncultured archaeon; uncultured archaeon
g_test	ccp	AB247822.1.918	10251.7	0	5	0.0143173	5.20161e-05	0.000107927	5.87565e-05	0.0018251	0	Archaea; Euryarchaeota; Thermoplasmata; Thermoplasmatales; Deep Sea Hydrothermal Vent Gp 2(DHVEG-2); Ambiguous_taxa; Ambiguous_taxa
g_test	ccp	New.ReferenceOTU3339	8109.42	0	5	5.66126e-06	2.47696e-06	0	0.0239003	0.00453044	2.63998e-06	Unassigned
g_test	ccp	AB095120.1.1050	8068.57	0	5	8.4919e-06	2.47696e-06	0.0393537	0.000106214	0.000823717	0	Archaea; Euryarchaeota; Methanococci; Methanococcales; Methanococcaceae; uncultured; uncultured archaeon
g_test	ccp	AB057722.1.1392	8059.39	0	5	8.4919e-06	9.90783e-06	0.0391127	0.000431635	0.000331102	0	Archaea; Euryarchaeota; Methanococci; Methanococcales; Methanococcaceae; Methanothermococcus
g_test	ccp	AB175587.1.979	7958.16	0	6	0.00035949	0.0260031	0.0575034	0.00124745	0.00918202	5.27996e-06	Archaea; Euryarchaeota; Archaeoglobi; Archaeoglobales; Archaeoglobaceae; Archaeoglobus
g_test	ccp	New.ReferenceOTU2020	7923.29	0	6	1.41532e-05	1.73387e-05	7.19512e-06	0.0238868	0.00337562	5.27996e-06	Unassigned
g_test	ccp	AB293244.1.1335	7729.65	0	5	1.41532e-05	0.027301	0.0213443	5.19769e-05	0.000104983	0	Archaea; Crenarchaeota; Thermoprotei; Thermoproteales; Thermoproteaceae; uncultured
g_test	ccp	New.ReferenceOTU2610	6986.02	0	4	5.66126e-06	2.47696e-06	0.0344934	9.03947e-06	0	0	Unassigned
g_test	ccp	New.ReferenceOTU852	6764.84	0	4	0	2.47696e-06	0	0.000225987	0.0741183	7.91993e-06	Unassigned
g_test	ccp	New.ReferenceOTU3235	6498.09	0	4	0.00845793	9.90783e-06	0	2.25987e-06	5.65296e-05	0	Archaea; Euryarchaeota; Thermococci; Thermococcales; Thermococcaceae; Palaeococcus; Ambiguous_taxa
g_test	ccp	AY251065.1.1426	6039.67	0	5	0.00832206	3.96313e-05	7.55488e-05	2.25987e-05	0.000678355	0	Archaea; Euryarchaeota; Thermoplasmata; Thermoplasmatales; Deep Sea Hydrothermal Vent Gp 2(DHVEG-2); Ambiguous_taxa; Ambiguous_taxa
g_test	ccp	New.ReferenceOTU238	5921.19	0	4	5.66126e-06	0	0	0.00539656	0.0464269	2.63998e-06	Unassigned
g_test	ccp	New.ReferenceOTU1764	5864.83	0	5	0.00781821	6.44009e-05	3.59756e-06	2.25987e-06	0.000113059	0	Unassigned
g_test	ccp	New.ReferenceOTU1643	5476.62	0	5	8.4919e-06	0	3.59756e-06	0.00381239	0.0473799	5.27996e-06	Unassigned
g_test	ccp	JF935168.1.1350	5276.34	0	4	0.00687844	7.43087e-06	1.43902e-05	0	4.03783e-05	0	Archaea; Euryarchaeota; Thermococci; Thermococcales; Thermococcaceae; Palaeococcus; Ambiguous_taxa
g_test	ccp	AB095133.1.1040	5065.5	0	4	1.69838e-05	0.017792	0.0125159	0.000149151	0	0	Archaea; Miscellaneous Euryarchaeotic Group(MEG); uncultured archaeon; uncultured archaeon; uncultured archaeon; uncultured archaeon; uncultured archaeon
g_test	ccp	New.ReferenceOTU2252	4377.54	0	5	1.13225e-05	0	3.59756e-06	0.0110033	0.0095858	2.63998e-06	Unassigned
g_test	ccp	New.ReferenceOTU1983	4109.32	0	4	0	4.95392e-06	3.59756e-06	0.0112632	0.00523302	0	Unassigned
g_test	ccp	HQ636027.1.905	4072	0	5	1.98144e-05	2.47696e-06	0.020337	6.7796e-06	0.000177664	0	Archaea; Crenarchaeota; Thermoprotei; Fervidicoccales; Fervidicoccaceae; uncultured
g_test	ccp	New.ReferenceOTU3376	3746.97	0	5	2.83063e-06	2.47696e-06	3.59756e-06	0.00910952	0.0090205	0	Unassigned
g_test	ccp	DQ228529.1.1198	3576.51	0	5	2.83063e-06	5.20161e-05	0.0180274	4.51973e-06	0.000282648	0	Archaea; Crenarchaeota; Thermoprotei; Desulfurococcales; Desulfurococcaceae; uncultured; uncultured archaeon
g_test	ccp	New.ReferenceOTU1894	3090.89	0	4	0.00212297	0	0	0.00112767	0.0488254	5.27996e-06	Unassigned
g_test	ccp	AB095134.1.1060	2979.36	0	4	5.66126e-06	0	0.0145126	0.000133332	9.69078e-05	0	Archaea; Euryarchaeota; Methanococci; Methanococcales; Methanococcaceae; Methanothermococcus
g_test	ccp	New.ReferenceOTU1583	2731.58	0	5	2.83063e-06	2.47696e-06	0	0.0051073	0.0121942	2.63998e-06	Unassigned
g_test	ccp	AB629609.1.935	2548.02	0	5	1.69838e-05	2.72465e-05	0.0125447	0.000350279	3.23026e-05	0	Archaea; Crenarchaeota; Thermoprotei; Desulfurococcales; Desulfurococcaceae; Ignisphaera
g_test	ccp	New.ReferenceOTU3289	2535.59	0	5	2.83063e-06	4.95392e-06	0.0125411	3.3898e-05	8.07565e-06	0	Unassigned
g_test	ccp	AB019735.1.1417	2316.13	0	5	0.00655291	0.00543692	0.000920976	9.49144e-05	0.00111444	0	Archaea; Euryarchaeota; Archaeoglobi; Archaeoglobales; Archaeoglobaceae; Archaeoglobus
g_test	ccp	New.ReferenceOTU1784	2156.53	0	4	0.00283346	4.95392e-06	0	2.25987e-06	4.84539e-05	0	Unassigned
g_test	ccp	New.ReferenceOTU1533	1905.92	0	5	0.00262683	1.73387e-05	1.43902e-05	1.12993e-05	0.00018574	0	Archaea; Euryarchaeota; Thermoplasmata; Thermoplasmatales; Deep Sea Hydrothermal Vent Gp 2(DHVEG-2); Ambiguous_taxa; Ambiguous_taxa
g_test	ccp	FR852925.1.919	1899.07	0	5	0.000141532	0.000319528	0.0120662	5.42368e-05	0.00114674	0	Archaea; Crenarchaeota; Thermoprotei; Desulfurococcales
g_test	ccp	FJ487499.1.1366	1823.93	0	4	0	2.47696e-06	3.59756e-06	0	0.00037148	0.00468068	Archaea; Thaumarchaeota; Marine Group I; Unknown Order; Unknown Family; Candidatus Nitrosopumilus; Ambiguous_taxa
g_test	ccp	AB235337.1.942	1679.57	0	5	0.000232112	0.00256117	0.015027	0.000944624	0.00012921	0	Archaea; Crenarchaeota; Thermoprotei; Thermoproteales; Thermofilaceae; Thermofilum; uncultured Thermoproteales archaeon
g_test	ccp	New.ReferenceOTU1485	1614.54	0	5	0.00585375	0.00140939	0.008555	0.000108474	3.23026e-05	0	Archaea; Nanoarchaeota; Nanoarchaeota Incertae Sedis; Unknown Order; Unknown Family; Nanoarchaeum; uncultured nanoarchaeote
g_test	ccp	New.ReferenceOTU2562	1558.87	0	4	5.66126e-06	0	3.59756e-06	0.00468696	0.000702582	0	Unassigned
g_test	ccp	New.ReferenceOTU2786	1477.82	0	4	2.83063e-06	0	0	0.0043299	0.00105791	2.63998e-06	Unassigned
g_test	ccp	DQ228530.1.1443	1461.46	0	5	2.83063e-06	0.000208064	0.00837153	2.25987e-06	0.000113059	0	Archaea; Crenarchaeota; Thermoprotei; Desulfurococcales; Desulfurococcaceae; uncultured; Ambiguous_taxa
g_test	ccp	New.ReferenceOTU247	1435.62	0	4	0.00201824	4.95392e-05	0	2.25987e-06	0.000104983	0	Unassigned
g_test	ccp	New.ReferenceOTU2278	1351.82	0	4	0.0018116	1.23848e-05	0	4.51973e-06	4.03783e-05	0	Unassigned
g_test	ccp	New.ReferenceOTU560	1069.3	0	4	0.00176348	8.66935e-05	0	1.58191e-05	0.000654128	0	Unassigned
g_test	ccp	FR852931.1.939	1066.44	0	5	3.39676e-05	0.00271227	0.00875647	0.000131072	4.84539e-05	0	Archaea; Crenarchaeota; Thermoprotei; Desulfurococcales; Desulfurococcaceae
g_test	ccp	JQ221004.1.915	1055.69	0	6	0.00320144	9.66014e-05	7.55488e-05	4.29375e-05	0.0466127	0.00212518	Archaea; Thaumarchaeota; Marine Group I
g_test	ccp	JQ221333.1.916	1014.81	0	6	0.00146627	0.000141187	3.95732e-05	9.03947e-06	0.0279337	0.000446156	Archaea; Thaumarchaeota; Marine Group I; uncultured marine archaeon; uncultured marine archaeon; uncultured marine archaeon; uncultured marine archaeon
g_test	ccp	AF068819.1.1419	999.405	0	4	0.00236924	0.00171406	0.000230244	2.25987e-06	0	0	Archaea; Euryarchaeota; Archaeoglobi; Archaeoglobales; Archaeoglobaceae; uncultured
g_test	ccp	AM749992.1.1368	941.611	0	4	0.000317031	0.00415881	0	8.13552e-05	0.00230964	0	Archaea; Euryarchaeota; Thermoplasmata; Thermoplasmatales; AMOS1A-4113-D04; uncultured archaeon; uncultured archaeon
g_test	ccp	FR852915.1.920	939.624	0	4	0	0	8.99391e-05	2.25987e-06	0.0102399	2.63998e-06	Archaea; Euryarchaeota; Thermoplasmata; Thermoplasmatales; 20c-4
g_test	ccp	JQ220653.1.915	922.564	0	6	0.00173801	3.22005e-05	5.7561e-05	0.000155931	0.0303725	0.000968872	Archaea; Thaumarchaeota; Marine Group I
g_test	ccp	AJ567653.1.908	908.254	0	4	0	2.47696e-06	3.59756e-06	0	0.00125173	0.00274558	Archaea; Thaumarchaeota; Marine Group I; Unknown Order; Unknown Family; Candidatus Nitrosopumilus; Ambiguous_taxa
g_test	ccp	EU559691.1.933	869.777	0	4	0	0.000183295	0.0051697	2.25987e-06	3.23026e-05	0	Archaea; Crenarchaeota; Thermoprotei; Desulfurococcales; Desulfurococcaceae; uncultured; uncultured archaeon
g_test	ccp	New.ReferenceOTU3389	835.704	0	4	0	4.95392e-06	0.000888598	2.03388e-05	0.00729231	0	Archaea; Euryarchaeota; Thermoplasmata; Thermoplasmatales; 20c-4; uncultured euryarchaeote; uncultured euryarchaeote
g_test	ccp	New.ReferenceOTU2272	825.477	0	5	1.41532e-05	0.00036659	0.00564817	1.12993e-05	6.46052e-05	0	Archaea; Nanoarchaeota; Nanoarchaeota Incertae Sedis; Unknown Order; Unknown Family; Nanoarchaeum; uncultured nanoarchaeote
g_test	ccp	KP091000.1.1463	813.894	0	4	0	0.00216238	0.00570933	0.000135592	5.65296e-05	0	Archaea; Euryarchaeota; Archaeoglobi; Archaeoglobales; Archaeoglobaceae; Archaeoglobus
g_test	ccp	New.ReferenceOTU3454	789.395	0	5	1.69838e-05	0.0029129	0.00188153	2.48585e-05	0.00018574	0	Archaea; Crenarchaeota; Thermoprotei; Desulfurococcales; Desulfurococcaceae; uncultured; uncultured archaeon
g_test	ccp	New.ReferenceOTU2297	761.861	0	4	0.00101903	7.43087e-06	7.19512e-06	0	8.07565e-06	0	Unassigned
g_test	ccp	KJ622296.1.1446	748.104	0	5	2.83063e-06	0.00222679	0.00510134	9.49144e-05	4.03783e-05	0	Archaea; Euryarchaeota; Archaeoglobi; Archaeoglobales; Archaeoglobaceae; Archaeoglobus
g_test	ccp	JQ220978.1.916	703.856	0	6	0.00200126	4.95392e-06	1.07927e-05	2.25987e-06	0.00644437	0.000261358	Archaea; Thaumarchaeota; Marine Group I; uncultured marine archaeon; uncultured marine archaeon; uncultured marine archaeon; uncultured marine archaeon
g_test	ccp	KF278499.1.1249	648.984	0	5	2.83063e-06	2.47696e-06	0.00231323	0.000144631	0.00165551	0	Archaea; Crenarchaeota; Thermoprotei; Desulfurococcales; Desulfurococcaceae
g_test	ccp	New.ReferenceOTU1002	643.424	0	5	0.00157383	0.0011394	0.000176281	9.03947e-06	8.07565e-06	0	Archaea; Euryarchaeota; Archaeoglobi; Archaeoglobales; Archaeoglobaceae; uncultured
g_test	ccp	FR852944.1.922	624.644	0	5	0.0192738	0.0410358	0.10606	0.000623723	0.00290723	0	Archaea; Euryarchaeota; Thermococci; Thermococcales; Thermococcaceae; Thermococcus; uncultured archaeon
g_test	ccp	AB611366.1.906	567.344	0	5	0.00222771	0.000693548	0.0027989	4.74572e-05	8.07565e-06	0	Archaea; Nanoarchaeota; Nanoarchaeota Incertae Sedis; Unknown Order; Unknown Family; Nanoarchaeum; uncultured nanoarchaeote
g_test	ccp	New.CleanUp.ReferenceOTU1314845	536.243	0	4	5.66126e-06	0	3.59756e-06	0.000314121	0.0050069	0	Unassigned
g_test	ccp	AB301877.1.932	531.003	0	6	7.92577e-05	7.18318e-05	0.000647561	6.7796e-06	0.00694506	2.63998e-06	Archaea; Euryarchaeota; Archaeoglobi; Archaeoglobales; Archaeoglobaceae; uncultured; uncultured archaeon
g_test	ccp	AB293231.1.1321	495.215	0	5	0.00114074	3.71544e-05	0.00198226	4.51973e-06	0.00104983	0	Archaea; Euryarchaeota; Thermoplasmata; Thermoplasmatales; Deep Sea Hydrothermal Vent Gp 2(DHVEG-2)
g_test	ccp	New.ReferenceOTU1087	447.532	0	5	8.4919e-06	0.000190726	0.00303994	2.03388e-05	2.4227e-05	0	Unassigned
g_test	ccp	KP091001.1.1481	440.938	0	5	5.66126e-06	0.001397	0.00301476	6.10164e-05	3.23026e-05	0	Archaea; Euryarchaeota; Archaeoglobi; Archaeoglobales; Archaeoglobaceae; Archaeoglobus
g_test	ccp	New.ReferenceOTU3381	412.7	0	4	5.09514e-05	2.47696e-06	0.00249311	6.7796e-06	0	0	Unassigned
g_test	ccp	JN856413.1.1453	361.805	0	5	2.83063e-06	2.47696e-05	0.00115482	0.000528809	2.4227e-05	0	Bacteria; Aquificae; Aquificae; Aquificales; Desulfurobacteriaceae; Desulfurobacterium; Ambiguous_taxa
g_test	ccp	GM015171.2023506.2024981	318.165	0	5	0.000730303	0.000735657	3.59756e-05	2.25987e-06	2.4227e-05	0	Archaea; Euryarchaeota; Thermococci; Thermococcales; Thermococcaceae; Thermococcus; uncultured archaeon
g_test	ccp	New.ReferenceOTU688	293.37	0	4	0.00040478	4.95392e-06	0	2.25987e-06	1.61513e-05	0	Unassigned
g_test	ccp	EU428002.1.942	286.382	0	4	1.98144e-05	0.00112949	0.00203262	1.58191e-05	0	0	Archaea; Crenarchaeota; Thermoprotei; Desulfurococcales; Pyrodictiaceae
g_test	ccp	New.ReferenceOTU584	273.34	0	4	2.83063e-06	0.00099326	0.000726708	0	6.46052e-05	0	Unassigned
g_test	ccp	FJ957443.1.1492	273.013	0	6	0.00080673	1.73387e-05	0.00104329	2.71184e-05	0.00144554	8.97593e-05	Bacteria; Actinobacteria; Actinobacteria; Propionibacteriales; Propionibacteriaceae; Propionibacterium; uncultured bacterium
g_test	ccp	New.CleanUp.ReferenceOTU704463	261.603	0	5	0.000249096	0.000577131	0.00392134	0.000151411	0.000113059	0	Unassigned
g_test	ccp	KM221248.1.942	254.226	0	5	8.4919e-06	0.000527592	0.00202903	8.36151e-05	7.26809e-05	0	Archaea; Crenarchaeota; Thermoprotei; Desulfurococcales; Desulfurococcaceae
g_test	ccp	New.ReferenceOTU1753	249.075	0	4	0.000840698	0.000183295	0.00111884	4.51973e-06	0	0	Archaea; Nanoarchaeota; Nanoarchaeota Incertae Sedis; Unknown Order; Unknown Family; Nanoarchaeum; uncultured nanoarchaeote
g_test	ccp	New.ReferenceOTU3041	231.094	0	4	2.83063e-06	0	0.0011764	2.25987e-06	1.61513e-05	0	Unassigned
g_test	ccp	AB193988.1.1441	221.686	0	6	0.00108979	0.000193203	3.59756e-05	1.80789e-05	0.0167166	0.00115631	Archaea; Thaumarchaeota; Marine Group I
g_test	ccp	AF068814.1.1423	205.258	0	4	5.66126e-06	0	0.00107567	2.25987e-06	2.4227e-05	0	Archaea; Euryarchaeota; Archaeoglobi; Archaeoglobales; Archaeoglobaceae; Archaeoglobus
g_test	ccp	New.ReferenceOTU2098	188.429	0	5	8.4919e-06	0.000725749	0.000431707	9.03947e-06	4.03783e-05	0	Archaea; Crenarchaeota; Thermoprotei; Desulfurococcales; Desulfurococcaceae; uncultured; uncultured archaeon
g_test	ccp	EU428004.1.940	180.952	0	5	5.66126e-06	1.73387e-05	0.00102531	1.12993e-05	8.88322e-05	0	Archaea; Crenarchaeota; Thermoprotei; Desulfurococcales
g_test	ccp	New.ReferenceOTU3365	163.216	0	4	0	0.000544931	0.000287805	2.25987e-06	2.4227e-05	0	Archaea; Crenarchaeota; Thermoprotei; Desulfurococcales; Desulfurococcaceae; uncultured; uncultured archaeon
g_test	ccp	New.ReferenceOTU1319	150.278	0	5	2.83063e-06	6.93548e-05	0.0010397	2.25987e-06	1.61513e-05	0	Unassigned
g_test	ccp	New.CleanUp.ReferenceOTU900806	148.621	0	5	2.83063e-06	0.000535023	0.000298598	6.7796e-06	2.4227e-05	0	Archaea; Crenarchaeota; Thermoprotei; Desulfurococcales; Desulfurococcaceae; uncultured; uncultured archaeon
g_test	ccp	New.ReferenceOTU1246	127.888	0	5	8.4919e-06	0.000520161	0.000345366	6.7796e-06	1.61513e-05	0	Archaea; Crenarchaeota; Thermoprotei; Desulfurococcales; Desulfurococcaceae; uncultured; uncultured archaeon
g_test	ccp	New.CleanUp.ReferenceOTU1303812	123.199	0	4	0.000198144	9.90783e-06	0	2.25987e-06	4.84539e-05	0	Archaea; Euryarchaeota; Thermococci; Thermococcales; Thermococcaceae; Palaeococcus
g_test	ccp	New.CleanUp.ReferenceOTU1661470	118.782	0	4	0	3.96313e-05	0.0007375	9.03947e-06	8.07565e-06	0	Archaea; Nanoarchaeota; Nanoarchaeota Incertae Sedis; Unknown Order; Unknown Family; Nanoarchaeum; uncultured nanoarchaeote
g_test	ccp	JQ220612.1.914	118.709	0	4	5.66126e-06	2.47696e-06	0	0	0.00209967	0.000427676	Archaea; Thaumarchaeota; Marine Group I; Ambiguous_taxa; Ambiguous_taxa; Ambiguous_taxa; Ambiguous_taxa
g_test	ccp	New.ReferenceOTU1088	94.8117	0	4	0.000390627	0.000106509	0.000820244	2.25987e-06	0	0	Archaea; Nanoarchaeota; Nanoarchaeota Incertae Sedis; Unknown Order; Unknown Family; Nanoarchaeum; uncultured nanoarchaeote
g_test	ccp	New.ReferenceOTU3450	86.7331	0	4	0	0.000312097	0.000330976	2.25987e-06	2.4227e-05	0	Archaea; Crenarchaeota; Thermoprotei; Desulfurococcales; Desulfurococcaceae; uncultured; uncultured archaeon
g_test	ccp	JF738097.1.941	82.452	0	4	0	0.00028485	0.000183476	2.25987e-06	8.07565e-06	0	Archaea; Crenarchaeota; Thermoprotei; Desulfurococcales; Desulfurococcaceae; uncultured; uncultured archaeon
g_test	ccp	New.CleanUp.ReferenceOTU599552	80.1896	0	4	2.83063e-06	0.000319528	0.000284207	0	6.46052e-05	0	Archaea; Crenarchaeota; Thermoprotei; Desulfurococcales; Desulfurococcaceae; uncultured; uncultured archaeon
g_test	ccp	New.ReferenceOTU260	78.9999	0	4	0.000152854	0	0	0.000119773	0.000912549	5.27996e-06	Unassigned
g_test	ccp	KF083453.1.1354	62.6677	3.82141e-14	5	0.000152854	0	0.000183476	2.25987e-06	0.000226118	7.91993e-06	Bacteria; Actinobacteria; Actinobacteria; Propionibacteriales; Propionibacteriaceae; Propionibacterium; uncultured bacterium
g_test	ccp	New.CleanUp.ReferenceOTU1322108	59.7788	1.60507e-13	4	0.000138701	4.95392e-06	0	9.03947e-06	0.000444161	0	Unassigned
g_test	ccp	FM242727.1.1145	56.9988	6.38948e-13	4	5.66126e-06	4.95392e-06	7.55488e-05	0	0.000670279	0	Archaea; Euryarchaeota; Archaeoglobi; Archaeoglobales; Archaeoglobaceae; Geoglobus; Ambiguous_taxa
g_test	ccp	New.CleanUp.ReferenceOTU721939	50.5674	1.57795e-11	4	0	0.000175864	0.000111524	2.25987e-06	8.07565e-06	0	Archaea; Crenarchaeota; Thermoprotei; Desulfurococcales; Desulfurococcaceae; uncultured; uncultured archaeon
g_test	ccp	New.ReferenceOTU2726	46.3852	1.26588e-10	5	0.000104733	2.47696e-06	0.000165488	2.25987e-06	8.07565e-06	0	Archaea; Euryarchaeota; Thermococci; Thermococcales; Thermococcaceae; Thermococcus
g_test	ccp	AJ431248.1.1498	42.2237	1.00515e-09	4	0.000138701	6.44009e-05	5.39634e-05	1.35592e-05	0	0	Bacteria; Thermotogae; Thermotogae; Mesoaciditogales; Mesoaciditogaceae; uncultured
g_test	ccp	New.CleanUp.ReferenceOTU822827	39.3426	4.20784e-09	4	5.66126e-05	0	3.95732e-05	9.03947e-06	0.000549144	0	Unassigned
g_test	ccp	JQ221323.1.914	34.7656	4.11318e-08	5	2.83063e-06	5.697e-05	0	2.25987e-06	0.000218043	9.50392e-05	Archaea; Thaumarchaeota; Marine Group I
g_test	ccp	FN562828.1.1271	33.455	7.85295e-08	4	2.83063e-06	0	1.43902e-05	9.71743e-05	6.46052e-05	0	Bacteria; Proteobacteria; Epsilonproteobacteria; Campylobacterales; Helicobacteraceae; Sulfurovum; uncultured Epsilonproteobacteria bacterium
g_test	ccp	New.ReferenceOTU24	31.4771	2.09331e-07	4	8.20883e-05	0.000123848	0.000647561	9.03947e-05	0	0	Archaea; Crenarchaeota; Thermoprotei; Desulfurococcales; Desulfurococcaceae; Ignicoccus
g_test	ccp	New.ReferenceOTU1168	30.8496	2.84078e-07	4	5.66126e-06	0	7.19512e-06	0	0.000581447	1.58399e-05	Unassigned
g_test	ccp	New.ReferenceOTU171	29.3331	6.01314e-07	4	5.94433e-05	0	6.11586e-05	6.7796e-06	8.07565e-06	0	Archaea; Euryarchaeota; Thermococci; Thermococcales; Thermococcaceae; Thermococcus
g_test	ccp	New.ReferenceOTU2651	25.4176	4.22412e-06	4	2.83063e-06	0.000116417	0.000100732	0	1.61513e-05	0	Archaea; Crenarchaeota; Thermoprotei; Desulfurococcales; Desulfurococcaceae; uncultured; uncultured archaeon
g_test	ccp	New.CleanUp.ReferenceOTU1657142	24.8933	5.44515e-06	4	0	2.47696e-06	0.000136707	2.25987e-06	8.07565e-06	0	Unassigned
g_test	ccp	AB193980.1.1441	24.6967	5.95894e-06	5	8.4919e-06	1.73387e-05	3.59756e-06	0	0.000702582	5.54395e-05	Archaea; Thaumarchaeota; Marine Group I; uncultured marine archaeon; uncultured marine archaeon; uncultured marine archaeon; uncultured marine archaeon
g_test	ccp	New.CleanUp.ReferenceOTU1045475	20.8768	3.9914e-05	4	0	7.18318e-05	3.23781e-05	2.25987e-06	8.07565e-06	0	Archaea; Crenarchaeota; Thermoprotei; Desulfurococcales; Desulfurococcaceae; uncultured; uncultured archaeon
g_test	ccp	AB111029.1.1388	20.494	4.79475e-05	4	0	6.93548e-05	0.000111524	6.7796e-06	8.07565e-06	0	Archaea; Euryarchaeota; Archaeoglobi; Archaeoglobales; Archaeoglobaceae; Geoglobus
g_test	ccp	FM242729.1.1163	19.9463	6.23134e-05	5	6.79352e-05	2.22926e-05	0.000219451	4.29375e-05	8.07565e-06	0	Archaea; Euryarchaeota; Thermococci; Thermococcales; Thermococcaceae; Thermococcus; Ambiguous_taxa
g_test	ccp	New.ReferenceOTU944	19.9381	6.23134e-05	5	0	2.47696e-06	3.59756e-06	7.68355e-05	1.61513e-05	5.27996e-06	Unassigned
g_test	ccp	AJ419869.1.1482	19.2399	8.76565e-05	4	4.81207e-05	2.47696e-06	8.99391e-05	4.51973e-06	0	0	Archaea; Euryarchaeota; Thermococci; Thermococcales; Thermococcaceae; Thermococcus
g_test	ccp	New.CleanUp.ReferenceOTU247619	15.8803	0.00046659	4	2.83063e-06	5.697e-05	3.59756e-06	0	8.07565e-06	0	Archaea; Nanoarchaeota; Nanoarchaeota Incertae Sedis; Unknown Order; Unknown Family; Nanoarchaeum; uncultured nanoarchaeote
g_test	ccp	U82237.1.1396	15.2834	0.000624031	4	3.96288e-05	2.47696e-06	6.47561e-05	6.7796e-06	0	0	Archaea; Euryarchaeota; Thermococci; Thermococcales; Thermococcaceae; Thermococcus
g_test	ccp	New.ReferenceOTU1000	14.0216	0.00116377	4	6.51045e-05	6.44009e-05	0.000348964	4.74572e-05	0	0	Archaea; Crenarchaeota; Thermoprotei; Desulfurococcales; Desulfurococcaceae; Ignicoccus
g_test	ccp	New.CleanUp.ReferenceOTU1332294	13.8567	0.00125419	4	2.83063e-06	6.68779e-05	3.23781e-05	0	1.61513e-05	0	Archaea; Crenarchaeota; Thermoprotei; Desulfurococcales; Desulfurococcaceae; uncultured; uncultured archaeon
g_test	ccp	GQ261797.1.1462	13.0921	0.00182442	4	4.52901e-05	8.17396e-05	0	1.35592e-05	1.61513e-05	0	Bacteria; Proteobacteria; Epsilonproteobacteria; Campylobacterales; Helicobacteraceae; Sulfurimonas; uncultured bacterium
g_test	ccp	HQ529898.1.916	12.3952	0.00256571	4	5.66126e-06	0	0	2.25987e-06	0.00024227	2.63998e-06	Archaea; Thaumarchaeota; Marine Group I
g_test	ccp	AB235330.1.1100	12.1904	0.00282126	5	3.1137e-05	0.000151094	0.000125915	2.25987e-06	8.07565e-06	0	Archaea; Crenarchaeota; Thermoprotei; Desulfurococcales; Desulfurococcaceae; uncultured; Ambiguous_taxa
g_test	ccp	KJ563960.1.906	11.6026	0.00375728	4	3.1137e-05	2.47696e-06	4.31707e-05	2.25987e-06	0	0	Archaea; Euryarchaeota; Thermoplasmata; Thermoplasmatales; Deep Sea Hydrothermal Vent Gp 2(DHVEG-2); uncultured archaeon; uncultured archaeon
g_test	ccp	New.ReferenceOTU1942	10.8089	0.0055468	4	2.26451e-05	0	5.03659e-05	2.25987e-06	8.07565e-06	0	Archaea; Euryarchaeota; Thermococci; Thermococcales; Thermococcaceae; Thermococcus
g_test	ccp	New.CleanUp.ReferenceOTU976788	10.4152	0.00670448	4	2.83063e-05	2.47696e-06	3.23781e-05	4.51973e-06	0	0	Archaea; Nanoarchaeota; Nanoarchaeota Incertae Sedis; Unknown Order; Unknown Family; Nanoarchaeum; uncultured nanoarchaeote
g_test	ccp	New.CleanUp.ReferenceOTU1752232	9.40907	0.0110083	4	3.1137e-05	4.95392e-06	5.7561e-05	2.25987e-06	0	0	Archaea; Euryarchaeota; Thermococci; Thermococcales; Thermococcaceae; Thermococcus
g_test	ccp	AB019239.1.1409	8.76579	0.0150762	4	2.83063e-05	9.66014e-05	5.39634e-05	0	8.07565e-06	0	Archaea; Euryarchaeota; Thermococci; Thermococcales; Thermococcaceae; Palaeococcus
g_test	ccp	New.CleanUp.ReferenceOTU155450	8.63625	0.0159709	4	2.83063e-06	4.95392e-05	3.59756e-05	2.25987e-06	0	0	Archaea; Crenarchaeota; Thermoprotei; Desulfurococcales; Desulfurococcaceae; uncultured; uncultured archaeon
g_test	ccp	New.CleanUp.ReferenceOTU1548394	6.69633	0.0418319	4	2.83063e-06	1.48617e-05	5.03659e-05	2.48585e-05	0	0	Archaea; Crenarchaeota; Thermoprotei; Desulfurococcales; Desulfurococcaceae; Ignicoccus
ccp=chalcoyprite (CuFeS2)

## Sheet: Arc py mrc
Supplementary Table S6: significant differences between counts in distinct bacterial and archaeal groups found in relation to mineralogy.
						active chimneys			inactive chimneys
Test	Variable	#OTU ID	Test-Statistic	FDR_P	n_sites	AS5	AS6	AS8	AS7	AS1	AS4	taxonomy
g_test	py/mrc	FJ487519.1.1341	142315	0	4	0	2.47696e-06	7.19512e-06	0	0.058395	0.928792	Archaea; Thaumarchaeota; Marine Group I; Unknown Order; Unknown Family; Candidatus Nitrosopumilus; Ambiguous_taxa
g_test	py/mrc	New.ReferenceOTU2259	124773	0	6	0.000350998	0.000156048	0.000194268	0.574293	0.144796	1.31999e-05	Unassigned
g_test	py/mrc	AB095131.1.1049	123603	0	5	0.549196	0.358953	0.0489988	0.000788693	0.00130826	0	Archaea; Euryarchaeota; Archaeoglobi; Archaeoglobales; Archaeoglobaceae; uncultured
g_test	py/mrc	AB980092.1.1440	49115.7	0	6	0.00013587	5.44931e-05	7.91464e-05	0.239281	0.00941621	2.63998e-06	Bacteria; Actinobacteria; Acidimicrobiia; Acidimicrobiales; uncultured; uncultured bacterium; uncultured bacterium
g_test	py/mrc	JQ678255.1.951	34999.1	0	5	0.067386	0.149232	0.00432427	0.00016949	3.23026e-05	0	Archaea; Euryarchaeota; Thermococci; Thermococcales; Thermococcaceae; Thermococcus; uncultured archaeon
g_test	py/mrc	New.ReferenceOTU812	16031.9	0	5	4.81207e-05	2.22926e-05	7.19512e-06	0.0693734	0.0345396	0	Unassigned
g_test	py/mrc	New.ReferenceOTU2137	14899.6	0	4	0	0	3.59756e-06	0.000772874	0.258251	1.58399e-05	Unassigned
g_test	py/mrc	JX507278.1.921	12733.4	0	5	0.0836055	0.000428514	0.000625976	4.97171e-05	0.000880246	0	Archaea; Euryarchaeota; Thermoplasmata; Thermoplasmatales; Deep Sea Hydrothermal Vent Gp 2(DHVEG-2); Ambiguous_taxa; Ambiguous_taxa
g_test	py/mrc	AB095117.1.953	10321.6	0	5	8.4919e-05	0.00139453	0.0924322	0.000237286	0.000331102	0	Archaea; Euryarchaeota; Methanococci; Methanococcales; Methanocaldococcaceae; Methanocaldococcus; Ambiguous_taxa
g_test	py/mrc	New.ReferenceOTU1646	9725.19	0	5	0.000251926	7.43087e-06	0.0784269	2.25987e-05	3.23026e-05	0	Unassigned
g_test	py/mrc	New.ReferenceOTU2803	9624.64	0	5	0.0594433	5.20161e-05	2.87805e-05	1.58191e-05	2.4227e-05	0	Unassigned
g_test	py/mrc	FJ150826.1.1353	8839.57	0	4	2.83063e-06	0	0	2.25987e-06	0.00376325	0.0579132	Archaea; Thaumarchaeota; Marine Group I; Unknown Order; Unknown Family; Candidatus Nitrosopumilus; Ambiguous_taxa
g_test	py/mrc	New.ReferenceOTU1975	7914.61	0	4	0.048769	2.97235e-05	1.07927e-05	1.58191e-05	0	0	Archaea; Woesearchaeota (DHVEG-6); Ambiguous_taxa; Ambiguous_taxa; Ambiguous_taxa; Ambiguous_taxa; Ambiguous_taxa
g_test	py/mrc	FR852956.1.939	7845.88	0	5	0.00190785	0.333545	0.226636	0.00320223	0.0208836	0	Archaea; Crenarchaeota; Thermoprotei; Desulfurococcales; Desulfurococcaceae; uncultured; uncultured archaeon
g_test	py/mrc	New.ReferenceOTU3339	5123.73	0	5	5.66126e-06	2.47696e-06	0	0.0239003	0.00453044	2.63998e-06	Unassigned
g_test	py/mrc	AB095120.1.1050	5101.1	0	5	8.4919e-06	2.47696e-06	0.0393537	0.000106214	0.000823717	0	Archaea; Euryarchaeota; Methanococci; Methanococcales; Methanococcaceae; uncultured; uncultured archaeon
g_test	py/mrc	AB057722.1.1392	5094.63	0	5	8.4919e-06	9.90783e-06	0.0391127	0.000431635	0.000331102	0	Archaea; Euryarchaeota; Methanococci; Methanococcales; Methanococcaceae; Methanothermococcus
g_test	py/mrc	New.ReferenceOTU2020	5012.69	0	6	1.41532e-05	1.73387e-05	7.19512e-06	0.0238868	0.00337562	5.27996e-06	Unassigned
g_test	py/mrc	New.ReferenceOTU2610	4415	0	4	5.66126e-06	2.47696e-06	0.0344934	9.03947e-06	0	0	Unassigned
g_test	py/mrc	New.ReferenceOTU852	4265.17	0	4	0	2.47696e-06	0	0.000225987	0.0741183	7.91993e-06	Unassigned
g_test	py/mrc	New.ReferenceOTU238	3742.98	0	4	5.66126e-06	0	0	0.00539656	0.0464269	2.63998e-06	Unassigned
g_test	py/mrc	FR852947.1.923	3619.36	0	5	0.0299085	0.00280887	0.00107927	0.00016497	0.00451429	0	Archaea; Euryarchaeota; Thermococci; Thermococcales; Thermococcaceae; Thermococcus
g_test	py/mrc	New.ReferenceOTU1643	3465.04	0	5	8.4919e-06	0	3.59756e-06	0.00381239	0.0473799	5.27996e-06	Unassigned
g_test	py/mrc	New.ReferenceOTU2252	2773.55	0	5	1.13225e-05	0	3.59756e-06	0.0110033	0.0095858	2.63998e-06	Unassigned
g_test	py/mrc	New.ReferenceOTU1983	2591.31	0	4	0	4.95392e-06	3.59756e-06	0.0112632	0.00523302	0	Unassigned
g_test	py/mrc	HQ636027.1.905	2586.46	0	5	1.98144e-05	2.47696e-06	0.020337	6.7796e-06	0.000177664	0	Archaea; Crenarchaeota; Thermoprotei; Fervidicoccales; Fervidicoccaceae; uncultured
g_test	py/mrc	New.ReferenceOTU3376	2367.77	0	5	2.83063e-06	2.47696e-06	3.59756e-06	0.00910952	0.0090205	0	Unassigned
g_test	py/mrc	DQ082935.1.1036	2249.39	0	5	0.0158176	2.47696e-06	3.59756e-06	0.000122033	0.000524917	0	Archaea; Euryarchaeota; Thermoplasmata; Thermoplasmatales; AMOS1A-4113-D04; uncultured archaeon; uncultured archaeon
g_test	py/mrc	DQ228529.1.1198	2247.75	0	5	2.83063e-06	5.20161e-05	0.0180274	4.51973e-06	0.000282648	0	Archaea; Crenarchaeota; Thermoprotei; Desulfurococcales; Desulfurococcaceae; uncultured; uncultured archaeon
g_test	py/mrc	AB095134.1.1060	1885.65	0	4	5.66126e-06	0	0.0145126	0.000133332	9.69078e-05	0	Archaea; Euryarchaeota; Methanococci; Methanococcales; Methanococcaceae; Methanothermococcus
g_test	py/mrc	New.ReferenceOTU1894	1757.73	0	4	0.00212297	0	0	0.00112767	0.0488254	5.27996e-06	Unassigned
g_test	py/mrc	AB247822.1.918	1740.2	0	5	0.0143173	5.20161e-05	0.000107927	5.87565e-05	0.0018251	0	Archaea; Euryarchaeota; Thermoplasmata; Thermoplasmatales; Deep Sea Hydrothermal Vent Gp 2(DHVEG-2); Ambiguous_taxa; Ambiguous_taxa
g_test	py/mrc	New.ReferenceOTU1583	1726.54	0	5	2.83063e-06	2.47696e-06	0	0.0051073	0.0121942	2.63998e-06	Unassigned
g_test	py/mrc	AB629609.1.935	1619.8	0	5	1.69838e-05	2.72465e-05	0.0125447	0.000350279	3.23026e-05	0	Archaea; Crenarchaeota; Thermoprotei; Desulfurococcales; Desulfurococcaceae; Ignisphaera
g_test	py/mrc	New.ReferenceOTU3289	1602.84	0	5	2.83063e-06	4.95392e-06	0.0125411	3.3898e-05	8.07565e-06	0	Unassigned
g_test	py/mrc	New.ReferenceOTU3235	1348.68	0	4	0.00845793	9.90783e-06	0	2.25987e-06	5.65296e-05	0	Archaea; Euryarchaeota; Thermococci; Thermococcales; Thermococcaceae; Palaeococcus; Ambiguous_taxa
g_test	py/mrc	AB019735.1.1417	1301.74	0	5	0.00655291	0.00543692	0.000920976	9.49144e-05	0.00111444	0	Archaea; Euryarchaeota; Archaeoglobi; Archaeoglobales; Archaeoglobaceae; Archaeoglobus
g_test	py/mrc	FR852925.1.919	1231.01	0	5	0.000141532	0.000319528	0.0120662	5.42368e-05	0.00114674	0	Archaea; Crenarchaeota; Thermoprotei; Desulfurococcales
g_test	py/mrc	New.ReferenceOTU1764	1229.32	0	5	0.00781821	6.44009e-05	3.59756e-06	2.25987e-06	0.000113059	0	Unassigned
g_test	py/mrc	AY251065.1.1426	1091.52	0	5	0.00832206	3.96313e-05	7.55488e-05	2.25987e-05	0.000678355	0	Archaea; Euryarchaeota; Thermoplasmata; Thermoplasmatales; Deep Sea Hydrothermal Vent Gp 2(DHVEG-2); Ambiguous_taxa; Ambiguous_taxa
g_test	py/mrc	JF935168.1.1350	1088.17	0	4	0.00687844	7.43087e-06	1.43902e-05	0	4.03783e-05	0	Archaea; Euryarchaeota; Thermococci; Thermococcales; Thermococcaceae; Palaeococcus; Ambiguous_taxa
g_test	py/mrc	New.ReferenceOTU2562	988.647	0	4	5.66126e-06	0	3.59756e-06	0.00468696	0.000702582	0	Unassigned
g_test	py/mrc	New.ReferenceOTU2786	935.579	0	4	2.83063e-06	0	0	0.0043299	0.00105791	2.63998e-06	Unassigned
g_test	py/mrc	DQ228530.1.1443	875.375	0	5	2.83063e-06	0.000208064	0.00837153	2.25987e-06	0.000113059	0	Archaea; Crenarchaeota; Thermoprotei; Desulfurococcales; Desulfurococcaceae; uncultured; Ambiguous_taxa
g_test	py/mrc	AB235337.1.942	763.187	0	5	0.000232112	0.00256117	0.015027	0.000944624	0.00012921	0	Archaea; Crenarchaeota; Thermoprotei; Thermoproteales; Thermofilaceae; Thermofilum; uncultured Thermoproteales archaeon
g_test	py/mrc	FJ487499.1.1366	695.397	0	4	0	2.47696e-06	3.59756e-06	0	0.00037148	0.00468068	Archaea; Thaumarchaeota; Marine Group I; Unknown Order; Unknown Family; Candidatus Nitrosopumilus; Ambiguous_taxa
g_test	py/mrc	JQ221004.1.915	658.453	0	6	0.00320144	9.66014e-05	7.55488e-05	4.29375e-05	0.0466127	0.00212518	Archaea; Thaumarchaeota; Marine Group I
g_test	py/mrc	JQ221333.1.916	638.875	0	6	0.00146627	0.000141187	3.95732e-05	9.03947e-06	0.0279337	0.000446156	Archaea; Thaumarchaeota; Marine Group I; uncultured marine archaeon; uncultured marine archaeon; uncultured marine archaeon; uncultured marine archaeon
g_test	py/mrc	JQ220653.1.915	597.998	0	6	0.00173801	3.22005e-05	5.7561e-05	0.000155931	0.0303725	0.000968872	Archaea; Thaumarchaeota; Marine Group I
g_test	py/mrc	FR852915.1.920	592.287	0	4	0	0	8.99391e-05	2.25987e-06	0.0102399	2.63998e-06	Archaea; Euryarchaeota; Thermoplasmata; Thermoplasmatales; 20c-4
g_test	py/mrc	AB175587.1.979	590.925	0	6	0.00035949	0.0260031	0.0575034	0.00124745	0.00918202	5.27996e-06	Archaea; Euryarchaeota; Archaeoglobi; Archaeoglobales; Archaeoglobaceae; Archaeoglobus
g_test	py/mrc	AF068819.1.1419	554.975	0	4	0.00236924	0.00171406	0.000230244	2.25987e-06	0	0	Archaea; Euryarchaeota; Archaeoglobi; Archaeoglobales; Archaeoglobaceae; uncultured
g_test	py/mrc	New.ReferenceOTU3389	525.999	0	4	0	4.95392e-06	0.000888598	2.03388e-05	0.00729231	0	Archaea; Euryarchaeota; Thermoplasmata; Thermoplasmatales; 20c-4; uncultured euryarchaeote; uncultured euryarchaeote
g_test	py/mrc	AB293244.1.1335	509.39	0	5	1.41532e-05	0.027301	0.0213443	5.19769e-05	0.000104983	0	Archaea; Crenarchaeota; Thermoprotei; Thermoproteales; Thermoproteaceae; uncultured
g_test	py/mrc	EU559691.1.933	502.959	0	4	0	0.000183295	0.0051697	2.25987e-06	3.23026e-05	0	Archaea; Crenarchaeota; Thermoprotei; Desulfurococcales; Desulfurococcaceae; uncultured; uncultured archaeon
g_test	py/mrc	New.ReferenceOTU2272	456.693	0	5	1.41532e-05	0.00036659	0.00564817	1.12993e-05	6.46052e-05	0	Archaea; Nanoarchaeota; Nanoarchaeota Incertae Sedis; Unknown Order; Unknown Family; Nanoarchaeum; uncultured nanoarchaeote
g_test	py/mrc	New.ReferenceOTU1784	438.216	0	4	0.00283346	4.95392e-06	0	2.25987e-06	4.84539e-05	0	Unassigned
g_test	py/mrc	AB095133.1.1040	420.609	0	4	1.69838e-05	0.017792	0.0125159	0.000149151	0	0	Archaea; Miscellaneous Euryarchaeotic Group(MEG); uncultured archaeon; uncultured archaeon; uncultured archaeon; uncultured archaeon; uncultured archaeon
g_test	py/mrc	KF278499.1.1249	412.183	0	5	2.83063e-06	2.47696e-06	0.00231323	0.000144631	0.00165551	0	Archaea; Crenarchaeota; Thermoprotei; Desulfurococcales; Desulfurococcaceae
g_test	py/mrc	AM749992.1.1368	374.883	0	4	0.000317031	0.00415881	0	8.13552e-05	0.00230964	0	Archaea; Euryarchaeota; Thermoplasmata; Thermoplasmatales; AMOS1A-4113-D04; uncultured archaeon; uncultured archaeon
g_test	py/mrc	AB301877.1.932	356.838	0	6	7.92577e-05	7.18318e-05	0.000647561	6.7796e-06	0.00694506	2.63998e-06	Archaea; Euryarchaeota; Archaeoglobi; Archaeoglobales; Archaeoglobaceae; uncultured; uncultured archaeon
g_test	py/mrc	New.ReferenceOTU1533	352.612	0	5	0.00262683	1.73387e-05	1.43902e-05	1.12993e-05	0.00018574	0	Archaea; Euryarchaeota; Thermoplasmata; Thermoplasmatales; Deep Sea Hydrothermal Vent Gp 2(DHVEG-2); Ambiguous_taxa; Ambiguous_taxa
g_test	py/mrc	New.ReferenceOTU1002	351.365	0	5	0.00157383	0.0011394	0.000176281	9.03947e-06	8.07565e-06	0	Archaea; Euryarchaeota; Archaeoglobi; Archaeoglobales; Archaeoglobaceae; uncultured
g_test	py/mrc	New.CleanUp.ReferenceOTU1314845	342.19	0	4	5.66126e-06	0	3.59756e-06	0.000314121	0.0050069	0	Unassigned
g_test	py/mrc	New.ReferenceOTU247	298.224	0	4	0.00201824	4.95392e-05	0	2.25987e-06	0.000104983	0	Unassigned
g_test	py/mrc	FR852944.1.922	283.905	0	5	0.0192738	0.0410358	0.10606	0.000623723	0.00290723	0	Archaea; Euryarchaeota; Thermococci; Thermococcales; Thermococcaceae; Thermococcus; uncultured archaeon
g_test	py/mrc	New.ReferenceOTU2278	274.855	0	4	0.0018116	1.23848e-05	0	4.51973e-06	4.03783e-05	0	Unassigned
g_test	py/mrc	New.ReferenceOTU3381	271.381	0	4	5.09514e-05	2.47696e-06	0.00249311	6.7796e-06	0	0	Unassigned
g_test	py/mrc	New.ReferenceOTU1087	250.361	0	5	8.4919e-06	0.000190726	0.00303994	2.03388e-05	2.4227e-05	0	Unassigned
g_test	py/mrc	AJ567653.1.908	243.995	0	4	0	2.47696e-06	3.59756e-06	0	0.00125173	0.00274558	Archaea; Thaumarchaeota; Marine Group I; Unknown Order; Unknown Family; Candidatus Nitrosopumilus; Ambiguous_taxa
g_test	py/mrc	JN856413.1.1453	226.138	0	5	2.83063e-06	2.47696e-05	0.00115482	0.000528809	2.4227e-05	0	Bacteria; Aquificae; Aquificae; Aquificales; Desulfurobacteriaceae; Desulfurobacterium; Ambiguous_taxa
g_test	py/mrc	GM015171.2023506.2024981	218.562	0	5	0.000730303	0.000735657	3.59756e-05	2.25987e-06	2.4227e-05	0	Archaea; Euryarchaeota; Thermococci; Thermococcales; Thermococcaceae; Thermococcus; uncultured archaeon
g_test	py/mrc	FR852931.1.939	183.558	0	5	3.39676e-05	0.00271227	0.00875647	0.000131072	4.84539e-05	0	Archaea; Crenarchaeota; Thermoprotei; Desulfurococcales; Desulfurococcaceae
g_test	py/mrc	New.CleanUp.ReferenceOTU704463	171.358	0	5	0.000249096	0.000577131	0.00392134	0.000151411	0.000113059	0	Unassigned
g_test	py/mrc	New.ReferenceOTU560	163.94	0	4	0.00176348	8.66935e-05	0	1.58191e-05	0.000654128	0	Unassigned
g_test	py/mrc	AB193988.1.1441	161.462	0	6	0.00108979	0.000193203	3.59756e-05	1.80789e-05	0.0167166	0.00115631	Archaea; Thaumarchaeota; Marine Group I
g_test	py/mrc	New.ReferenceOTU2297	156.885	0	4	0.00101903	7.43087e-06	7.19512e-06	0	8.07565e-06	0	Unassigned
g_test	py/mrc	New.ReferenceOTU3041	147.751	0	4	2.83063e-06	0	0.0011764	2.25987e-06	1.61513e-05	0	Unassigned
g_test	py/mrc	AF068814.1.1423	132.258	0	4	5.66126e-06	0	0.00107567	2.25987e-06	2.4227e-05	0	Archaea; Euryarchaeota; Archaeoglobi; Archaeoglobales; Archaeoglobaceae; Archaeoglobus
g_test	py/mrc	EU428004.1.940	115.543	0	5	5.66126e-06	1.73387e-05	0.00102531	1.12993e-05	8.88322e-05	0	Archaea; Crenarchaeota; Thermoprotei; Desulfurococcales
g_test	py/mrc	New.ReferenceOTU1319	83.0329	0	5	2.83063e-06	6.93548e-05	0.0010397	2.25987e-06	1.61513e-05	0	Unassigned
g_test	py/mrc	KP091000.1.1463	81.7432	0	4	0	0.00216238	0.00570933	0.000135592	5.65296e-05	0	Archaea; Euryarchaeota; Archaeoglobi; Archaeoglobales; Archaeoglobaceae; Archaeoglobus
g_test	py/mrc	New.ReferenceOTU3454	76.5109	0	5	1.69838e-05	0.0029129	0.00188153	2.48585e-05	0.00018574	0	Archaea; Crenarchaeota; Thermoprotei; Desulfurococcales; Desulfurococcaceae; uncultured; uncultured archaeon
g_test	py/mrc	New.CleanUp.ReferenceOTU1661470	65.475	1.11683e-15	4	0	3.96313e-05	0.0007375	9.03947e-06	8.07565e-06	0	Archaea; Nanoarchaeota; Nanoarchaeota Incertae Sedis; Unknown Order; Unknown Family; Nanoarchaeum; uncultured nanoarchaeote
g_test	py/mrc	KM221248.1.942	65.1499	1.32443e-15	5	8.4919e-06	0.000527592	0.00202903	8.36151e-05	7.26809e-05	0	Archaea; Crenarchaeota; Thermoprotei; Desulfurococcales; Desulfurococcaceae
g_test	py/mrc	New.ReferenceOTU688	58.0256	5.0834e-14	4	0.00040478	4.95392e-06	0	2.25987e-06	1.61513e-05	0	Unassigned
g_test	py/mrc	KJ622296.1.1446	45.4022	3.11684e-11	5	2.83063e-06	0.00222679	0.00510134	9.49144e-05	4.03783e-05	0	Archaea; Euryarchaeota; Archaeoglobi; Archaeoglobales; Archaeoglobaceae; Archaeoglobus
g_test	py/mrc	FM242727.1.1145	37.9736	1.37711e-09	4	5.66126e-06	4.95392e-06	7.55488e-05	0	0.000670279	0	Archaea; Euryarchaeota; Archaeoglobi; Archaeoglobales; Archaeoglobaceae; Geoglobus; Ambiguous_taxa
g_test	py/mrc	FR852950.1.924	36.8215	2.45821e-09	5	0.0277034	0.000795104	0.0391739	0.000244066	0.00533801	0	Archaea; Euryarchaeota; Thermoplasmata; Thermoplasmatales; Deep Sea Hydrothermal Vent Gp 2(DHVEG-2); uncultured archaeon; uncultured archaeon
g_test	py/mrc	New.ReferenceOTU24	22.9534	3.11668e-06	4	8.20883e-05	0.000123848	0.000647561	9.03947e-05	0	0	Archaea; Crenarchaeota; Thermoprotei; Desulfurococcales; Desulfurococcaceae; Ignicoccus
g_test	py/mrc	New.ReferenceOTU2098	22.3955	4.12082e-06	5	8.4919e-06	0.000725749	0.000431707	9.03947e-06	4.03783e-05	0	Archaea; Crenarchaeota; Thermoprotei; Desulfurococcales; Desulfurococcaceae; uncultured; uncultured archaeon
g_test	py/mrc	FN562828.1.1271	21.9454	5.15294e-06	4	2.83063e-06	0	1.43902e-05	9.71743e-05	6.46052e-05	0	Bacteria; Proteobacteria; Epsilonproteobacteria; Campylobacterales; Helicobacteraceae; Sulfurovum; uncultured Epsilonproteobacteria bacterium
g_test	py/mrc	KP091001.1.1481	21.4651	6.54802e-06	5	5.66126e-06	0.001397	0.00301476	6.10164e-05	3.23026e-05	0	Archaea; Euryarchaeota; Archaeoglobi; Archaeoglobales; Archaeoglobaceae; Archaeoglobus
g_test	py/mrc	AB293231.1.1321	21.442	6.5569e-06	5	0.00114074	3.71544e-05	0.00198226	4.51973e-06	0.00104983	0	Archaea; Euryarchaeota; Thermoplasmata; Thermoplasmatales; Deep Sea Hydrothermal Vent Gp 2(DHVEG-2)
g_test	py/mrc	New.CleanUp.ReferenceOTU1303812	21.1528	7.54431e-06	4	0.000198144	9.90783e-06	0	2.25987e-06	4.84539e-05	0	Archaea; Euryarchaeota; Thermococci; Thermococcales; Thermococcaceae; Palaeococcus
g_test	py/mrc	New.ReferenceOTU3365	20.9148	8.45301e-06	4	0	0.000544931	0.000287805	2.25987e-06	2.4227e-05	0	Archaea; Crenarchaeota; Thermoprotei; Desulfurococcales; Desulfurococcaceae; uncultured; uncultured archaeon
g_test	py/mrc	New.ReferenceOTU584	20.3716	1.11105e-05	4	2.83063e-06	0.00099326	0.000726708	0	6.46052e-05	0	Unassigned
g_test	py/mrc	New.ReferenceOTU1168	20.0489	1.30178e-05	4	5.66126e-06	0	7.19512e-06	0	0.000581447	1.58399e-05	Unassigned
g_test	py/mrc	New.ReferenceOTU260	18.8685	2.39071e-05	4	0.000152854	0	0	0.000119773	0.000912549	5.27996e-06	Unassigned
g_test	py/mrc	New.CleanUp.ReferenceOTU900806	18.3184	3.15843e-05	5	2.83063e-06	0.000535023	0.000298598	6.7796e-06	2.4227e-05	0	Archaea; Crenarchaeota; Thermoprotei; Desulfurococcales; Desulfurococcaceae; uncultured; uncultured archaeon
g_test	py/mrc	New.CleanUp.ReferenceOTU1657142	15.2538	0.000157268	4	0	2.47696e-06	0.000136707	2.25987e-06	8.07565e-06	0	Unassigned
g_test	py/mrc	New.CleanUp.ReferenceOTU822827	13.599	0.000374968	4	5.66126e-05	0	3.95732e-05	9.03947e-06	0.000549144	0	Unassigned
g_test	py/mrc	New.ReferenceOTU1246	13.5494	0.000381256	5	8.4919e-06	0.000520161	0.000345366	6.7796e-06	1.61513e-05	0	Archaea; Crenarchaeota; Thermoprotei; Desulfurococcales; Desulfurococcaceae; uncultured; uncultured archaeon
g_test	py/mrc	AB611366.1.906	12.7614	0.000575001	5	0.00222771	0.000693548	0.0027989	4.74572e-05	8.07565e-06	0	Archaea; Nanoarchaeota; Nanoarchaeota Incertae Sedis; Unknown Order; Unknown Family; Nanoarchaeum; uncultured nanoarchaeote
g_test	py/mrc	New.ReferenceOTU944	10.969	0.0014912	5	0	2.47696e-06	3.59756e-06	7.68355e-05	1.61513e-05	5.27996e-06	Unassigned
g_test	py/mrc	GQ261797.1.1462	10.6466	0.00175811	4	4.52901e-05	8.17396e-05	0	1.35592e-05	1.61513e-05	0	Bacteria; Proteobacteria; Epsilonproteobacteria; Campylobacterales; Helicobacteraceae; Sulfurimonas; uncultured bacterium
g_test	py/mrc	AJ431248.1.1498	10.5756	0.00180987	4	0.000138701	6.44009e-05	5.39634e-05	1.35592e-05	0	0	Bacteria; Thermotogae; Thermotogae; Mesoaciditogales; Mesoaciditogaceae; uncultured
g_test	py/mrc	FJ957443.1.1492	9.96699	0.00249387	6	0.00080673	1.73387e-05	0.00104329	2.71184e-05	0.00144554	8.97593e-05	Bacteria; Actinobacteria; Actinobacteria; Propionibacteriales; Propionibacteriaceae; Propionibacterium; uncultured bacterium
g_test	py/mrc	New.ReferenceOTU1000	9.70654	0.00284684	4	6.51045e-05	6.44009e-05	0.000348964	4.74572e-05	0	0	Archaea; Crenarchaeota; Thermoprotei; Desulfurococcales; Desulfurococcaceae; Ignicoccus
g_test	py/mrc	AB193980.1.1441	9.3673	0.00339368	5	8.4919e-06	1.73387e-05	3.59756e-06	0	0.000702582	5.54395e-05	Archaea; Thaumarchaeota; Marine Group I; uncultured marine archaeon; uncultured marine archaeon; uncultured marine archaeon; uncultured marine archaeon
g_test	py/mrc	HQ529898.1.916	8.56876	0.00520673	4	5.66126e-06	0	0	2.25987e-06	0.00024227	2.63998e-06	Archaea; Thaumarchaeota; Marine Group I
g_test	py/mrc	JF738097.1.941	7.74118	0.00814453	4	0	0.00028485	0.000183476	2.25987e-06	8.07565e-06	0	Archaea; Crenarchaeota; Thermoprotei; Desulfurococcales; Desulfurococcaceae; uncultured; uncultured archaeon
g_test	py/mrc	JQ220612.1.914	7.11348	0.0114421	4	5.66126e-06	2.47696e-06	0	0	0.00209967	0.000427676	Archaea; Thaumarchaeota; Marine Group I; Ambiguous_taxa; Ambiguous_taxa; Ambiguous_taxa; Ambiguous_taxa
g_test	py/mrc	New.CleanUp.ReferenceOTU247619	6.91499	0.0126714	4	2.83063e-06	5.697e-05	3.59756e-06	0	8.07565e-06	0	Archaea; Nanoarchaeota; Nanoarchaeota Incertae Sedis; Unknown Order; Unknown Family; Nanoarchaeum; uncultured nanoarchaeote
g_test	py/mrc	FM242729.1.1163	6.86124	0.0129447	5	6.79352e-05	2.22926e-05	0.000219451	4.29375e-05	8.07565e-06	0	Archaea; Euryarchaeota; Thermococci; Thermococcales; Thermococcaceae; Thermococcus; Ambiguous_taxa
g_test	py/mrc	AB019239.1.1409	5.72131	0.0244179	4	2.83063e-05	9.66014e-05	5.39634e-05	0	8.07565e-06	0	Archaea; Euryarchaeota; Thermococci; Thermococcales; Thermococcaceae; Palaeococcus
g_test	py/mrc	New.CleanUp.ReferenceOTU721939	4.66976	0.0443418	4	0	0.000175864	0.000111524	2.25987e-06	8.07565e-06	0	Archaea; Crenarchaeota; Thermoprotei; Desulfurococcales; Desulfurococcaceae; uncultured; uncultured archaeon
py/mrc=pyrite/marcasite (FeS2)

## Sheet: Arc sp
Supplementary Table S6: significant differences between counts in distinct bacterial and archaeal groups found in relation to mineralogy.
						active chimneys			inactive chimneys
Test	Variable	#OTU ID	Test-Statistic	FDR_P	n_sites	AS5	AS6	AS8	AS7	AS1	AS4	taxonomy
g_test	sp	FJ487519.1.1341	226176	0	4	0	2.47696e-06	7.19512e-06	0	0.058395	0.928792	Archaea; Thaumarchaeota; Marine Group I; Unknown Order; Unknown Family; Candidatus Nitrosopumilus; Ambiguous_taxa
g_test	sp	New.ReferenceOTU2259	93390	0	6	0.000350998	0.000156048	0.000194268	0.574293	0.144796	1.31999e-05	Unassigned
g_test	sp	FR852956.1.939	66304.6	0	5	0.00190785	0.333545	0.226636	0.00320223	0.0208836	0	Archaea; Crenarchaeota; Thermoprotei; Desulfurococcales; Desulfurococcaceae; uncultured; uncultured archaeon
g_test	sp	AB980092.1.1440	36757	0	6	0.00013587	5.44931e-05	7.91464e-05	0.239281	0.00941621	2.63998e-06	Bacteria; Actinobacteria; Acidimicrobiia; Acidimicrobiales; uncultured; uncultured bacterium; uncultured bacterium
g_test	sp	AB095131.1.1049	24715.5	0	5	0.549196	0.358953	0.0489988	0.000788693	0.00130826	0	Archaea; Euryarchaeota; Archaeoglobi; Archaeoglobales; Archaeoglobaceae; uncultured
g_test	sp	JX507278.1.921	19246.6	0	5	0.0836055	0.000428514	0.000625976	4.97171e-05	0.000880246	0	Archaea; Euryarchaeota; Thermoplasmata; Thermoplasmatales; Deep Sea Hydrothermal Vent Gp 2(DHVEG-2); Ambiguous_taxa; Ambiguous_taxa
g_test	sp	New.ReferenceOTU2803	14413.3	0	5	0.0594433	5.20161e-05	2.87805e-05	1.58191e-05	2.4227e-05	0	Unassigned
g_test	sp	FJ150826.1.1353	14072	0	4	2.83063e-06	0	0	2.25987e-06	0.00376325	0.0579132	Archaea; Thaumarchaeota; Marine Group I; Unknown Order; Unknown Family; Candidatus Nitrosopumilus; Ambiguous_taxa
g_test	sp	New.ReferenceOTU812	12001.4	0	5	4.81207e-05	2.22926e-05	7.19512e-06	0.0693734	0.0345396	0	Unassigned
g_test	sp	New.ReferenceOTU1975	11857.2	0	4	0.048769	2.97235e-05	1.07927e-05	1.58191e-05	0	0	Archaea; Woesearchaeota (DHVEG-6); Ambiguous_taxa; Ambiguous_taxa; Ambiguous_taxa; Ambiguous_taxa; Ambiguous_taxa
g_test	sp	New.ReferenceOTU2137	11152	0	4	0	0	3.59756e-06	0.000772874	0.258251	1.58399e-05	Unassigned
g_test	sp	AB175587.1.979	9117.1	0	6	0.00035949	0.0260031	0.0575034	0.00124745	0.00918202	5.27996e-06	Archaea; Euryarchaeota; Archaeoglobi; Archaeoglobales; Archaeoglobaceae; Archaeoglobus
g_test	sp	AB095117.1.953	8957.71	0	5	8.4919e-05	0.00139453	0.0924322	0.000237286	0.000331102	0	Archaea; Euryarchaeota; Methanococci; Methanococcales; Methanocaldococcaceae; Methanocaldococcus; Ambiguous_taxa
g_test	sp	New.ReferenceOTU1646	7104.91	0	5	0.000251926	7.43087e-06	0.0784269	2.25987e-05	3.23026e-05	0	Unassigned
g_test	sp	AB293244.1.1335	5849.22	0	5	1.41532e-05	0.027301	0.0213443	5.19769e-05	0.000104983	0	Archaea; Crenarchaeota; Thermoprotei; Thermoproteales; Thermoproteaceae; uncultured
g_test	sp	FR852944.1.922	4792.61	0	5	0.0192738	0.0410358	0.10606	0.000623723	0.00290723	0	Archaea; Euryarchaeota; Thermococci; Thermococcales; Thermococcaceae; Thermococcus; uncultured archaeon
g_test	sp	FR852947.1.923	4555.59	0	5	0.0299085	0.00280887	0.00107927	0.00016497	0.00451429	0	Archaea; Euryarchaeota; Thermococci; Thermococcales; Thermococcaceae; Thermococcus
g_test	sp	New.ReferenceOTU3339	3835.95	0	5	5.66126e-06	2.47696e-06	0	0.0239003	0.00453044	2.63998e-06	Unassigned
g_test	sp	AB057722.1.1392	3825.56	0	5	8.4919e-06	9.90783e-06	0.0391127	0.000431635	0.000331102	0	Archaea; Euryarchaeota; Methanococci; Methanococcales; Methanococcaceae; Methanothermococcus
g_test	sp	AB095120.1.1050	3818.98	0	5	8.4919e-06	2.47696e-06	0.0393537	0.000106214	0.000823717	0	Archaea; Euryarchaeota; Methanococci; Methanococcales; Methanococcaceae; uncultured; uncultured archaeon
g_test	sp	New.ReferenceOTU2020	3761.77	0	6	1.41532e-05	1.73387e-05	7.19512e-06	0.0238868	0.00337562	5.27996e-06	Unassigned
g_test	sp	AB095133.1.1040	3674.74	0	4	1.69838e-05	0.017792	0.0125159	0.000149151	0	0	Archaea; Miscellaneous Euryarchaeotic Group(MEG); uncultured archaeon; uncultured archaeon; uncultured archaeon; uncultured archaeon; uncultured archaeon
g_test	sp	DQ082935.1.1036	3579.97	0	5	0.0158176	2.47696e-06	3.59756e-06	0.000122033	0.000524917	0	Archaea; Euryarchaeota; Thermoplasmata; Thermoplasmatales; AMOS1A-4113-D04; uncultured archaeon; uncultured archaeon
g_test	sp	New.ReferenceOTU2610	3307.81	0	4	5.66126e-06	2.47696e-06	0.0344934	9.03947e-06	0	0	Unassigned
g_test	sp	New.ReferenceOTU852	3192.22	0	4	0	2.47696e-06	0	0.000225987	0.0741183	7.91993e-06	Unassigned
[truncated: 99 more rows]
