# Supplementary material for: Hydrothermal chimneys host habitat-specific microbial communities: analogues for studying the possible impact of mining seafloor massive sulfide deposits
Source: Sci Rep. 2018 Jul 10;8:10386. doi: 10.1038/s41598-018-28613-5 (PMC6039533; doi:10.1038/s41598-018-28613-5)
Supplement: Supplementary file 7 — Supplementary table S7: rare species in Kairei and Pelagia fields. [file 41598_2018_28613_MOESM7_ESM.xlsx]

## Sheet: exclusive rare Bac_Chim_S_talus
Supplementary table S7: rare species in Kairei and Pelagia fields.
Supplementary table S7.1: exclusive rare bacterial species in chimneys and sulfide talus.
	open ocean		plume		sulfide talus	vent fluids		active chimney			inactive chimney
#OTU ID	RF4	RF1	F9	F5	S3	F6	F1	S5	S6	S8	S7	S1	S2	S4
Bacteria;Actinobacteria;Actinobacteria;Micrococcales;Bogoriellaceae;Georgenia	0	0	0	0	0	0	0	0	0	2.02772e-05	0	0	0	0
Bacteria;Actinobacteria;Actinobacteria;Micrococcales;Intrasporangiaceae;Janibacter	0	0	0	0	0	0	0	0	0	3.68677e-06	0	0	0	0
Bacteria;Actinobacteria;Actinobacteria;Micrococcales;Intrasporangiaceae;Tetrasphaera	0	0	0	0	0	0	0	0	0	0	0	2.1733e-06	0	0
Bacteria;Actinobacteria;Actinobacteria;Micromonosporales;Micromonosporaceae;Pilimelia	0	0	0	0	0	0	0	0	0	0	0	0	0	2.78864e-06
Bacteria;Actinobacteria;Coriobacteriia;Coriobacteriales;Coriobacteriaceae;Atopobium	0	0	0	0	0	0	0	0	0	5.53016e-06	0	0	0	0
Bacteria;Bacteroidetes;Cytophagia;Cytophagales;Cytophagaceae;Dyadobacter	0	0	0	0	0	0	0	0	0	1.10603e-05	0	0	0	0
Bacteria;Bacteroidetes;Flavobacteriia;Flavobacteriales;Flavobacteriaceae;Aequorivita	0	0	0	0	0	0	0	0	0	0	3.47769e-06	0	0	0
Bacteria;Bacteroidetes;Flavobacteriia;Flavobacteriales;Flavobacteriaceae;Aestuariicola	0	0	0	0	1.08473e-05	0	0	0	0	0	0	5.43326e-06	0	4.18296e-06
Bacteria;Bacteroidetes;Flavobacteriia;Flavobacteriales;Flavobacteriaceae;Algibacter	0	0	0	0	0	0	0	0	0	0	0	1.08665e-05	0	0
Bacteria;Bacteroidetes;Flavobacteriia;Flavobacteriales;Flavobacteriaceae;Bizionia	0	0	0	0	2.27794e-05	0	0	0	0	0	5.21653e-06	3.15129e-05	0	2.78864e-05
Bacteria;Bacteroidetes;Flavobacteriia;Flavobacteriales;Flavobacteriaceae;Dokdonia	0	0	0	0	0	0	0	0	0	0	6.95537e-06	0	0	0
Bacteria;Bacteroidetes;Flavobacteriia;Flavobacteriales;Flavobacteriaceae;Flavobacteriaceae bacterium 'BSD RB 42'	0	0	0	0	0	0	0	0	0	0	0	2.1733e-06	0	0
Bacteria;Bacteroidetes;Flavobacteriia;Flavobacteriales;Flavobacteriaceae;Lutimonas	0	0	0	0	0	0	0	0	0	0	0	4.34661e-06	0	0
Bacteria;Bacteroidetes;Flavobacteriia;Flavobacteriales;Flavobacteriaceae;Marixanthomonas	0	0	0	0	5.42367e-05	0	0	0	0	0	0	0	0	0
Bacteria;Bacteroidetes;Flavobacteriia;Flavobacteriales;Flavobacteriaceae;NS3a marine group	0	0	0	0	0	0	0	0	0	0	0	2.1733e-06	0	0
Bacteria;Bacteroidetes;Flavobacteriia;Flavobacteriales;Flavobacteriaceae;Pricia	0	0	0	0	0	0	0	0	0	0	3.47769e-06	0	0	0
Bacteria;Candidate division WS3;saltmarsh clone LCP-67;saltmarsh clone LCP-67;saltmarsh clone LCP-67;saltmarsh clone LCP-67	0	0	0	0	0	0	0	0	0	0	3.47769e-06	0	0	0
Bacteria;Cyanobacteria;Chloroplast;Gerbera hybrid cultivar;Gerbera hybrid cultivar;Gerbera hybrid cultivar	0	0	0	0	0	0	0	0	0	1.84339e-06	0	0	0.000167885	0
Bacteria;Elusimicrobia;Elusimicrobia;Elusimicrobiales;Elusimicrobiaceae;Elusimicrobium	0	0	0	0	0	0	0	0	0	0	0	0	0	2.78864e-06
Bacteria;Firmicutes;Bacilli;Bacillales;Bacillaceae;Geobacillus	0	0	0	0	0	0	0	0	0	1.47471e-05	0	0	0	0
Bacteria;Planctomycetes;Planctomycetacia;Brocadiales;Brocadiaceae;Candidatus Scalindua	0	0	0	0	0.000145354	0	0	0	0	0	0	0	0	8.36593e-06
Bacteria;Proteobacteria;Alphaproteobacteria;Rhizobiales;Brucellaceae;Daeguia	0	0	0	0	0	0	0	0	0	1.10603e-05	0	0	0	0
Bacteria;Proteobacteria;Alphaproteobacteria;Rhizobiales;Brucellaceae;Ochrobactrum	0	0	0	0	0	0	0	0	0	0	0	3.25996e-06	1.45285e-05	2.78864e-06
Bacteria;Proteobacteria;Alphaproteobacteria;Rhizobiales;Hyphomicrobiaceae;Rhodomicrobium	0	0	0	0	2.06099e-05	0	0	0	0	0	0	0	0	2.78864e-05
Bacteria;Proteobacteria;Alphaproteobacteria;Rhizobiales;Methylocystaceae;Pleomorphomonas	0	0	0	0	0	0	0	0	0	0	0	5.43326e-06	0	0
Bacteria;Proteobacteria;Alphaproteobacteria;Rhizobiales;Phyllobacteriaceae;Ahrensia	0	0	0	0	5.42367e-06	0	0	0	0	0	0	2.93396e-05	0	0
Bacteria;Proteobacteria;Alphaproteobacteria;Rhizobiales;Phyllobacteriaceae;Aquamicrobium	0	0	0	0	2.16947e-05	0	0	0	0	0	2.43438e-05	6.84591e-05	0	5.57728e-06
Bacteria;Proteobacteria;Alphaproteobacteria;Rhizobiales;Phyllobacteriaceae;Pseudaminobacter	0	0	0	0	0	0	0	0	0	0	0	2.1733e-06	0	0
Bacteria;Proteobacteria;Alphaproteobacteria;Rhodobacterales;Rhodobacteraceae;Candidatus Planktomarina (DC5-80-3 lineage)	0	0	0	0	3.2542e-06	0	0	0	0	0	0	0	0	3.34637e-05
Bacteria;Proteobacteria;Alphaproteobacteria;Rhodobacterales;Rhodobacteraceae;Celeribacter	0	0	0	0	2.16947e-06	0	0	0	0	0	0	0	0	2.78864e-06
Bacteria;Proteobacteria;Alphaproteobacteria;Rhodobacterales;Rhodobacteraceae;Dinoroseobacter	0	0	0	0	2.16947e-06	0	0	0	0	0	1.91273e-05	4.78127e-05	0	0
Bacteria;Proteobacteria;Alphaproteobacteria;Rhodobacterales;Rhodobacteraceae;Jannaschia	0	0	0	0	2.16947e-06	0	0	0	0	0	2.08661e-05	5.43326e-06	0	0
Bacteria;Proteobacteria;Alphaproteobacteria;Rhodobacterales;Rhodobacteraceae;Lentibacter	0	0	0	0	0	0	0	0	0	0	0	8.69321e-06	0	0
Bacteria;Proteobacteria;Alphaproteobacteria;Rhodobacterales;Rhodobacteraceae;Litoreibacter	0	0	0	0	0	0	0	0	0	0	0	3.25996e-06	0	0
Bacteria;Proteobacteria;Alphaproteobacteria;Rhodobacterales;Rhodobacteraceae;Oceanicella	0	0	0	0	0	0	0	0	0	0	0	3.25996e-06	0	0
Bacteria;Proteobacteria;Alphaproteobacteria;Rhodobacterales;Rhodobacteraceae;Planktotalea	0	0	0	0	0	0	0	0	0	0	1.39107e-05	0	0	0
Bacteria;Proteobacteria;Alphaproteobacteria;Rhodobacterales;Rhodobacteraceae;Profundibacterium	0	0	0	0	3.2542e-06	0	0	0	0	0	0	0	0	0
Bacteria;Proteobacteria;Alphaproteobacteria;Rhodobacterales;Rhodobacteraceae;Pseudovibrio	0	0	0	0	1.08473e-05	0	0	0	0	0	2.95603e-05	9.77987e-06	0	2.78864e-06
Bacteria;Proteobacteria;Alphaproteobacteria;Rhodobacterales;Rhodobacteraceae;Rubellimicrobium	0	0	0	0	0	0	0	0	0	1.47471e-05	0	0	0	0
Bacteria;Proteobacteria;Alphaproteobacteria;Rhodobacterales;Rhodobacteraceae;Stappia	0	0	0	0	0	0	0	0	0	0	1.73884e-05	0	0	0
Bacteria;Proteobacteria;Alphaproteobacteria;Rhodospirillales;Rhodospirillaceae;Azospirillum	0	0	0	0	0	0	0	0	0	0	0	0	0	2.78864e-06
Bacteria;Proteobacteria;Alphaproteobacteria;Rhodospirillales;Rhodospirillaceae;Dongia	0	0	0	0	3.2542e-06	0	0	0	0	0	0	0	0	0
Bacteria;Proteobacteria;Alphaproteobacteria;Rhodospirillales;Rhodospirillaceae;Tistlia	0	0	0	0	0	0	0	0	0	0	0	0	0	4.18296e-06
Bacteria;Proteobacteria;Alphaproteobacteria;Rickettsiales;Holosporaceae;Candidatus Gortzia	0	0	0	0	0	0	0	0	0	0	0	1.62998e-05	0	0
Bacteria;Proteobacteria;Alphaproteobacteria;SB1-18;carbazole-degrading bacterium OC13S;carbazole-degrading bacterium OC13S	0	0	0	0	0	0	0	0	0	0	0	0	0	2.78864e-06
Bacteria;Proteobacteria;Alphaproteobacteria;Sphingomonadales;Sphingomonadales Incertae Sedis;Kiloniella	0	0	0	0	0	0	0	0	0	0	0	3.25996e-06	0	0
Bacteria;Proteobacteria;Betaproteobacteria;Hydrogenophilales;Hydrogenophilaceae;Sulfuricella	0	0	0	0	9.54566e-05	0	0	0	0	0	0	0	0	1.67319e-05
Bacteria;Proteobacteria;Betaproteobacteria;Hydrogenophilales;Hydrogenophilaceae;Tepidiphilus	0	0	0	0	0	0	0	0	0	7.37354e-06	0	0	0	0
Bacteria;Proteobacteria;Betaproteobacteria;Neisseriales;Neisseriaceae;Aquitalea	0	0	0	0	0	0	0	0	0	7.37354e-06	0	0	0	0
Bacteria;Proteobacteria;Betaproteobacteria;Rhodocyclales;Rhodocyclaceae;Azospira	0	0	0	0	2.16947e-06	0	0	0	0	0	0	0	0	0
Bacteria;Proteobacteria;Betaproteobacteria;Rhodocyclales;Rhodocyclaceae;Propionivibrio	0	0	0	0	0	0	0	0	0	0	0	2.1733e-06	0	0
Bacteria;Proteobacteria;Deltaproteobacteria;Desulfobacterales;Desulfobacteraceae;Desulfosalsimonas	0	0	0	0	0	0	0	0	0	0	0	3.25996e-06	0	0
Bacteria;Proteobacteria;Deltaproteobacteria;Desulfobacterales;Desulfobulbaceae;Desulfofustis	0	0	0	0	0	0	0	0	0	0	6.95537e-06	0	0	0
Bacteria;Proteobacteria;Deltaproteobacteria;Desulfovibrionales;Desulfohalobiaceae;Desulfonatronospira	0	0	0	0	0	0	0	0	0	1.10603e-05	0	0	0	0
Bacteria;Proteobacteria;Deltaproteobacteria;Myxococcales;Sandaracinaceae;myxobacterium SIBN-17	0	0	0	0	0	0	0	0	0	0	0	6.51991e-06	0	0
Bacteria;Proteobacteria;Gammaproteobacteria;Acidithiobacillales;Acidithiobacillaceae;Acidithiobacillus	0	0	0	0	1.73557e-05	0	0	0	0	0	0	0	0	1.25489e-05
Bacteria;Proteobacteria;Gammaproteobacteria;Alteromonadales;Alteromonadaceae;Gilvimarinus	0	0	0	0	3.2542e-06	0	0	0	0	0	0	0	0	0
Bacteria;Proteobacteria;Gammaproteobacteria;Chromatiales;Chromatiaceae;Thiohalocapsa	0	0	0	0	2.16947e-06	0	0	0	0	0	0	0	0	0
Bacteria;Proteobacteria;Gammaproteobacteria;Chromatiales;Ectothiorhodospiraceae;Spiribacter	0	0	0	0	0	0	0	0	0	0	0	0	0	1.81262e-05
Bacteria;Proteobacteria;Gammaproteobacteria;Xanthomonadales;Xanthomonadaceae;Aquimonas	0	0	0	0	5.42367e-06	0	0	0	0	0	0	0	0	0
Bacteria;Proteobacteria;Gammaproteobacteria;Xanthomonadales;Xanthomonadaceae;Arenimonas	0	0	0	0	5.42367e-06	0	0	0	0	0	0	0	0	0
Bacteria;Proteobacteria;Gammaproteobacteria;Xanthomonadales;Xanthomonadaceae;Dokdonella	0	0	0	0	3.2542e-06	0	0	0	0	0	0	0	0	4.18296e-06
Bacteria;Proteobacteria;Gammaproteobacteria;Xanthomonadales;Xanthomonadaceae;Metallibacterium	0	0	0	0	0.000155117	0	0	0	0	0	0	0	1.61428e-06	0.000124095
Bacteria;Proteobacteria;Gammaproteobacteria;Xanthomonadales;Xanthomonadaceae;Pseudofulvimonas	0	0	0	0	2.38641e-05	0	0	0	0	0	0	0	0	8.36593e-06
Bacteria;Proteobacteria;Gammaproteobacteria;Xanthomonadales;Xanthomonadaceae;Rhodanobacter	0	0	0	0	2.16947e-05	0	0	0	0	0	0	0	0	7.66877e-05

## Sheet: rare Bac
Supplementary table S7: rare species in Kairei and Pelagia fields.
Supplementary table S7.2: rare bacterial species in chimneys, sulfide talus and also other sites.
	open ocean		plume		sulfide talus	vent fluids		active chimney			inactive chimney
#OTU ID	RF4	RF1	F9	F5	S3	F6	F1	S5	S6	S8	S7	S1	S2	S4
Bacteria;Acidobacteria;Acidobacteria;Acidobacteriales;Acidobacteriaceae (Subgroup 1);Granulicella	0	0	0	0	0.000303726	2.34629e-05	6.59963e-06	0	0	0	0	0	0.000104319	0.000330454
Bacteria;Acidobacteria;Acidobacteria;Subgroup 4;Unknown Family;Blastocatella	4.4123e-06	0	1.22515e-05	0	0.000295048	0	0	0	0	0	0	0	6.51991e-06	9.76025e-06
Bacteria;Actinobacteria;Acidimicrobiia;Acidimicrobiales;Acidimicrobiaceae;Ilumatobacter	0	0	6.68265e-06	0	0	5.10064e-06	7.52358e-05	0	0	0	0	0	4.56394e-05	0
Bacteria;Actinobacteria;Acidimicrobiia;Acidimicrobiales;Acidimicrobiales Incertae Sedis;Candidatus Microthrix	0	0	2.22755e-06	0	0	0	5.27971e-06	0	0	0	0	0	0	6.9716e-06
Bacteria;Actinobacteria;Acidimicrobiia;Acidimicrobiales;Iamiaceae;Iamia	0	0	0	0	7.59314e-06	0	3.95978e-06	0	0	0	0	0	6.73724e-05	0
Bacteria;Actinobacteria;Actinobacteria;Actinomycetales;Actinomycetaceae;Actinomyces	0	3.16511e-06	4.4551e-06	2.45309e-06	0	0	1.31993e-06	0	0	3.68677e-05	0	0	0	0
Bacteria;Actinobacteria;Actinobacteria;Bifidobacteriales;Bifidobacteriaceae;Bifidobacterium	0	1.26604e-05	3.34133e-06	4.90619e-06	0	0	0	0	0	2.94942e-05	0	0	0	0
Bacteria;Actinobacteria;Actinobacteria;Corynebacteriales;Nocardiaceae;Rhodococcus	0	0	0	0	0	2.04026e-06	0	0	0	0	0	6.45712e-06	0	0
Bacteria;Actinobacteria;Actinobacteria;Micrococcales;Bogoriellaceae;Georgenia	0	0	0	0	0	0	0	0	0	2.02772e-05	0	0	0	0
Bacteria;Actinobacteria;Actinobacteria;Micrococcales;Intrasporangiaceae;Janibacter	0	0	0	0	0	0	0	0	0	3.68677e-06	0	0	0	0
Bacteria;Actinobacteria;Actinobacteria;Micrococcales;Intrasporangiaceae;Tetrasphaera	0	0	0	0	0	0	0	0	0	0	0	0	2.1733e-06	0
Bacteria;Actinobacteria;Actinobacteria;Micrococcales;Microbacteriaceae;Microbacterium	0	3.16511e-06	0	0	0	0	0	0	0	0	0	8.0714e-05	0	0
Bacteria;Actinobacteria;Actinobacteria;Micrococcales;Micrococcaceae;Micrococcus	8.82459e-06	2.8486e-05	1.22515e-05	3.31168e-05	0	0	2.63985e-06	0	0	0	0	0.000590827	0	0
Bacteria;Actinobacteria;Actinobacteria;Micrococcales;Micrococcaceae;Nesterenkonia	0	1.26604e-05	0	2.45309e-06	0	0	0	0	0	0	0	1.61428e-06	0	4.18296e-06
Bacteria;Actinobacteria;Actinobacteria;Micromonosporales;Micromonosporaceae;Pilimelia	0	0	0	0	0	0	0	0	0	0	0	0	0	2.78864e-06
Bacteria;Actinobacteria;Actinobacteria;Propionibacteriales;Nocardioidaceae;Nocardioides	0	0	2.22755e-06	0	0	0	0	0	0	7.37354e-06	0	0	0	0
Bacteria;Actinobacteria;Coriobacteriia;Coriobacteriales;Coriobacteriaceae;Atopobium	0	0	0	0	0	0	0	0	0	5.53016e-06	0	0	0	0
Bacteria;Aquificae;Aquificae;Aquificales;Aquificaceae;Aquifex	0	0	2.56168e-05	0	0	0.00233405	2.77185e-05	6.27356e-06	0	7.00487e-05	0	0	0	0
Bacteria;Aquificae;Aquificae;Aquificales;Aquificaceae;Hydrogenivirga	0	0	0	0	0	2.34629e-05	6.07166e-05	0	1.66418e-06	0	0	0	4.34661e-06	0
Bacteria;Aquificae;Aquificae;Aquificales;Desulfurobacteriaceae;Balnearium	0	0	5.56888e-06	1.22655e-06	0	0.0014649	9.76746e-05	0.000134881	4.16046e-05	7.37354e-06	0	1.61428e-06	0	0
Bacteria;Aquificae;Aquificae;Aquificales;Hydrogenothermaceae;Hydrogenothermus	0	1.58255e-06	1.22515e-05	0	0	0.000145878	0.000394658	0	0	0	1.73884e-06	0	1.08665e-06	0
Bacteria;Aquificae;Aquificae;Aquificales;Hydrogenothermaceae;Persephonella	0	0	4.56648e-05	1.22655e-06	0	0.000376427	7.2596e-05	0	1.66418e-06	0	0	0	0	0
Bacteria;Aquificae;Aquificae;Aquificales;Hydrogenothermaceae;Sulfurihydrogenibium	0	0	2.22755e-06	0	0	3.46844e-05	3.5638e-05	1.56839e-06	4.82613e-05	1.47471e-05	0	0	0	0
Bacteria;Bacteroidetes;Bacteroidia;Bacteroidales;Marinilabiaceae;Marinifilum	0	0	0.000179318	0	0	8.16103e-05	5.27971e-05	0	0	0	1.21719e-05	0	0	0
Bacteria;Bacteroidetes;Bacteroidia;Bacteroidales;Porphyromonadaceae;Porphyromonas	2.94153e-06	0	0	0	0	0	0	0	0	3.68677e-06	0	0	0	0
Bacteria;Bacteroidetes;Bacteroidia;Bacteroidales;Prevotellaceae;Alloprevotella	0	0	0	1.22655e-05	0	0	0	0	3.32837e-06	8.66391e-05	0	0	0	0
Bacteria;Bacteroidetes;Bacteroidia;Bacteroidales;Prevotellaceae;Prevotella	0	4.74766e-06	0	0	0	0	0	0	0	0	3.47769e-06	0	0	0
Bacteria;Bacteroidetes;Cytophagia;Cytophagales;Cytophagaceae;Dyadobacter	0	0	0	0	0	0	0	0	0	1.10603e-05	0	0	0	0
Bacteria;Bacteroidetes;Cytophagia;Cytophagales;Cytophagaceae;Hymenobacter	0	0	2.22755e-06	0	2.71183e-05	0	0	0	0	7.37354e-06	0	0	0	5.57728e-06
Bacteria;Bacteroidetes;Cytophagia;Cytophagales;Flammeovirgaceae;Candidatus Amoebophilus	2.5003e-05	0	0	0	2.16947e-06	0	0	0	0	0	0	0	1.08665e-06	9.76025e-06
Bacteria;Bacteroidetes;Cytophagia;Cytophagales;Flammeovirgaceae;Fabibacter	1.47077e-06	6.33022e-06	1.33653e-05	8.58583e-06	0.000149693	1.83623e-05	1.8479e-05	0	4.99255e-06	0	0	0	0.000109752	5.43785e-05
Bacteria;Bacteroidetes;Cytophagia;Cytophagales;Flammeovirgaceae;Fulvivirga	0	0	0	0	6.39993e-05	3.06038e-06	0	0	0	0	7.82479e-05	1.77571e-05	6.73724e-05	0.000242612
Bacteria;Bacteroidetes;Cytophagia;Cytophagales;Flammeovirgaceae;Marinoscillum	0.000226498	6.64673e-05	5.68026e-05	8.58583e-05	0.000152947	0	1.58391e-05	0	0	0	5.21653e-06	0	1.52131e-05	0.000359735
Bacteria;Bacteroidetes;Flavobacteriia;Flavobacteriales;Cryomorphaceae;Brumimicrobium	0	0	0	0	0	0	2.63985e-06	0	0	0	1.73884e-06	0	1.95597e-05	0
Bacteria;Bacteroidetes;Flavobacteriia;Flavobacteriales;Cryomorphaceae;Salinirepens	0	0	7.79643e-06	2.45309e-06	0	3.06038e-06	0	0	0	0	0	0	2.1733e-06	0
Bacteria;Bacteroidetes;Flavobacteriia;Flavobacteriales;Flavobacteriaceae;Actibacter	0	1.58255e-06	6.68265e-06	0	6.5084e-06	0	0.000192709	6.27356e-06	0	0	0.000283431	0	0.000166258	0
Bacteria;Bacteroidetes;Flavobacteriia;Flavobacteriales;Flavobacteriaceae;Aequorivita	0	0	0	0	0	0	0	0	0	0	3.47769e-06	0	0	0
Bacteria;Bacteroidetes;Flavobacteriia;Flavobacteriales;Flavobacteriaceae;Aestuariicola	0	0	0	0	1.08473e-05	0	0	0	0	0	0	0	5.43326e-06	4.18296e-06
Bacteria;Bacteroidetes;Flavobacteriia;Flavobacteriales;Flavobacteriaceae;Algibacter	0	0	0	0	0	0	0	0	0	0	0	0	1.08665e-05	0
Bacteria;Bacteroidetes;Flavobacteriia;Flavobacteriales;Flavobacteriaceae;Bizionia	0	0	0	0	2.27794e-05	0	0	0	0	0	5.21653e-06	0	3.15129e-05	2.78864e-05
Bacteria;Bacteroidetes;Flavobacteriia;Flavobacteriales;Flavobacteriaceae;Dokdonia	0	0	0	0	0	0	0	0	0	0	6.95537e-06	0	0	0
Bacteria;Bacteroidetes;Flavobacteriia;Flavobacteriales;Flavobacteriaceae;Flavobacteriaceae bacterium 'BSD RB 42'	0	0	0	0	0	0	0	0	0	0	0	0	2.1733e-06	0
Bacteria;Bacteroidetes;Flavobacteriia;Flavobacteriales;Flavobacteriaceae;Formosa	4.4123e-06	0	0	0	0	0	1.18793e-05	0	0	0	0	0	2.93396e-05	0
Bacteria;Bacteroidetes;Flavobacteriia;Flavobacteriales;Flavobacteriaceae;Gangjinia	0	0	0	0	0	0	3.95978e-06	0	0	0	1.73884e-06	0	0	0
Bacteria;Bacteroidetes;Flavobacteriia;Flavobacteriales;Flavobacteriaceae;Gilvibacter	0	0	3.11857e-05	0	0.000511994	1.02013e-06	1.05594e-05	0	0	0	0	0	4.34661e-06	0.000210542
Bacteria;Bacteroidetes;Flavobacteriia;Flavobacteriales;Flavobacteriaceae;Kordia	0	4.74766e-06	0	0	0.000158371	2.04026e-06	2.63985e-06	0	0	0	0.000205183	0	1.52131e-05	0
Bacteria;Bacteroidetes;Flavobacteriia;Flavobacteriales;Flavobacteriaceae;Leeuwenhoekiella	0.00282828	0.000238966	0.0245064	0.000101803	8.67787e-06	4.99863e-05	3.95978e-06	0	0	0	0	1.93714e-05	8.69321e-06	1.39432e-06
Bacteria;Bacteroidetes;Flavobacteriia;Flavobacteriales;Flavobacteriaceae;Lutimonas	0	0	0	0	0	0	0	0	0	0	0	0	4.34661e-06	0
Bacteria;Bacteroidetes;Flavobacteriia;Flavobacteriales;Flavobacteriaceae;Maribacter	0	0	0	0	1.30168e-05	1.02013e-05	9.23948e-06	0	0	0	0.000201706	0	0.000145611	6.9716e-06
Bacteria;Bacteroidetes;Flavobacteriia;Flavobacteriales;Flavobacteriaceae;Marixanthomonas	0	0	0	0	5.42367e-05	0	0	0	0	0	0	0	0	0
Bacteria;Bacteroidetes;Flavobacteriia;Flavobacteriales;Flavobacteriaceae;Mesoflavibacter	0	0	0	0	2.16947e-06	0	3.95978e-06	0	0	0	0	0	0	0
Bacteria;Bacteroidetes;Flavobacteriia;Flavobacteriales;Flavobacteriaceae;Mesonia	0.0129957	0.00050167	0.0310109	0.00973756	4.33894e-06	0.00173626	6.86362e-05	1.56839e-06	0	1.84339e-06	0	2.09856e-05	1.19532e-05	5.57728e-06
Bacteria;Bacteroidetes;Flavobacteriia;Flavobacteriales;Flavobacteriaceae;Muricauda	0.00443877	0.01339	0.00150694	0.00209617	0	0.000789579	0.000308863	0	0	0	0	0	0	1.39432e-06
Bacteria;Bacteroidetes;Flavobacteriia;Flavobacteriales;Flavobacteriaceae;NS2b marine group	9.26582e-05	3.79813e-05	0	2.08513e-05	0	0	0	0	0	0	1.73884e-06	0	0.000117358	0
Bacteria;Bacteroidetes;Flavobacteriia;Flavobacteriales;Flavobacteriaceae;NS3a marine group	0	0	0	0	0	0	0	0	0	0	0	0	2.1733e-06	0
Bacteria;Bacteroidetes;Flavobacteriia;Flavobacteriales;Flavobacteriaceae;NS4 marine group	0.000692731	0.000519078	4.12097e-05	0.000349566	0	3.06038e-05	1.45192e-05	0	0	0	0	0	3.25996e-06	0
Bacteria;Bacteroidetes;Flavobacteriia;Flavobacteriales;Flavobacteriaceae;Pibocella	0	0	5.4575e-05	0	0.000414368	3.06038e-06	1.58391e-05	0	0	0	0.00013563	0	0.000693284	0
Bacteria;Bacteroidetes;Flavobacteriia;Flavobacteriales;Flavobacteriaceae;Pricia	0	0	0	0	0	0	0	0	0	0	3.47769e-06	0	0	0
Bacteria;Bacteroidetes;Flavobacteriia;Flavobacteriales;Flavobacteriaceae;Psychroserpens	0	0	0	0	0.000105219	2.04026e-06	0.000124073	0	0	0	4.86876e-05	0	0.000400975	1.39432e-05
Bacteria;Bacteroidetes;Flavobacteriia;Flavobacteriales;Flavobacteriaceae;Salegentibacter	0.0189214	0.00112045	0.00324443	6.13273e-06	0	5.10064e-06	5.27971e-06	0	0	0	0	3.22856e-06	3.25996e-06	0
Bacteria;Bacteroidetes;Flavobacteriia;Flavobacteriales;Flavobacteriaceae;Subsaxibacter	2.94153e-06	0	0	0	0	0	0	0	0	0	0	0	0	2.78864e-06
Bacteria;Bacteroidetes;Flavobacteriia;Flavobacteriales;Flavobacteriaceae;Sufflavibacter	0.000198553	0.00163794	1.0024e-05	0.000566665	1.30168e-05	3.06038e-06	6.59963e-06	0	0	0	3.47769e-06	0	1.52131e-05	0
Bacteria;Bacteroidetes;Flavobacteriia;Flavobacteriales;Flavobacteriaceae;Zobellia	0	0	0	0	2.16947e-06	3.06038e-06	1.31993e-06	0	0	0	0	0	0	0
Bacteria;Bacteroidetes;Flavobacteriia;Flavobacteriales;Flavobacteriaceae;Zunongwangia	0.000247089	4.90592e-05	2.11617e-05	0.180558	0	0.000111194	0	0	0	0	0	0	2.1733e-05	0
Bacteria;Bacteroidetes;Sphingobacteriia;Sphingobacteriales;Chitinophagaceae;Sediminibacterium	0	0	0	3.67964e-06	2.16947e-06	0	0	0	0	0	0	0	0	0
Bacteria;Bacteroidetes;Sphingobacteriia;Sphingobacteriales;Saprospiraceae;Aureispira	0.000136781	8.38754e-05	0.000110264	9.56707e-05	7.81008e-05	1.02013e-05	1.97989e-05	0	0	0	1.91273e-05	1.61428e-06	3.25996e-05	0.000168713
Bacteria;Candidate division WS3;saltmarsh clone LCP-67;saltmarsh clone LCP-67;saltmarsh clone LCP-67;saltmarsh clone LCP-67	0	0	0	0	0	0	0	0	0	0	3.47769e-06	0	0	0
Bacteria;Chlamydiae;Chlamydiae;Chlamydiales;Chlamydiales Incertae Sedis;Criblamydia	0	0	0	0	4.12199e-05	0	1.05594e-05	0	0	0	0	0	0	9.34195e-05
Bacteria;Chlamydiae;Chlamydiae;Chlamydiales;Parachlamydiaceae;Candidatus Protochlamydia	1.17661e-05	3.16511e-06	0	0	0	3.06038e-06	1.45192e-05	0	0	0	0	0	6.51991e-06	0
Bacteria;Chlamydiae;Chlamydiae;Chlamydiales;Parachlamydiaceae;Neochlamydia	0	0	4.4551e-06	0	2.38641e-05	3.06038e-06	7.91956e-06	0	0	0	0	0	0	1.25489e-05
Bacteria;Chlamydiae;Chlamydiae;Chlamydiales;Parachlamydiaceae;Parachlamydia	1.47077e-05	0	0	3.67964e-06	3.47115e-05	0	2.63985e-06	0	0	0	0	0	2.4993e-05	0.000126883
Bacteria;Chlamydiae;Chlamydiae;Chlamydiales;Simkaniaceae;Candidatus Fritschea	2.64738e-05	6.33022e-06	8.9102e-06	6.13273e-06	7.81008e-05	2.04026e-06	3.95978e-06	0	0	0	0	0	0.000105405	0.000404353
Bacteria;Chlamydiae;Chlamydiae;Chlamydiales;Simkaniaceae;Candidatus Rhabdochlamydia	0	0	0	0	5.3152e-05	2.04026e-06	0	0	0	0	0	1.61428e-06	1.08665e-05	0.000507533
Bacteria;Chlamydiae;Chlamydiae;Chlamydiales;Simkaniaceae;Simkania	0	0	0	7.35928e-06	1.73557e-05	0	0	0	0	0	0	0	0	0.000147798
Bacteria;Chlamydiae;Chlamydiae;Chlamydiales;Waddliaceae;Waddlia	1.02954e-05	1.89906e-05	0	1.10389e-05	7.59314e-06	0	9.23948e-06	0	0	0	0	0	0	5.57728e-06
Bacteria;Cyanobacteria;Chloroplast;Gerbera hybrid cultivar;Gerbera hybrid cultivar;Gerbera hybrid cultivar	0	0	0	0	0	0	0	0	0	1.84339e-06	0	0.000167885	0	0
Bacteria;Cyanobacteria;Cyanobacteria;SubsectionI;FamilyI;Synechococcus	0.000167667	0.000117109	1.78204e-05	3.43433e-05	0	5.10064e-06	6.59963e-06	0	1.66418e-06	0	0	1.61428e-06	0	0
Bacteria;Deferribacteres;Deferribacteres;Deferribacterales;Deferribacterales Incertae Sedis;Caldithrix	0.000141193	0.000194654	0.000193797	8.95379e-05	0.000547791	0.000533527	0.000329982	0.00019448	0	0.000912476	1.04331e-05	0	3.58595e-05	0.000563306
Bacteria;Deinococcus-Thermus;Deinococci;Deinococcales;Trueperaceae;Truepera	0	7.91277e-05	0	1.59451e-05	6.5084e-06	7.54895e-05	0.000167631	1.56839e-06	0	0	0	0	0.000218417	1.39432e-06
Bacteria;Deinococcus-Thermus;Deinococci;Thermales;Thermaceae;Meiothermus	0	0	0	2.45309e-06	0.000247319	0	0	0	0	0	0	0	0	4.74069e-05
Bacteria;Deinococcus-Thermus;Deinococci;Thermales;Thermaceae;Vulcanithermus	0	0	1.11378e-06	0	0	2.04026e-05	5.27971e-06	0	4.99255e-06	0.000110603	0	0	0	0
Bacteria;Elusimicrobia;Elusimicrobia;Elusimicrobiales;Elusimicrobiaceae;Elusimicrobium	0	0	0	0	0	0	0	0	0	0	0	0	0	2.78864e-06
Bacteria;Fibrobacteres;Fibrobacteria;Fibrobacteria Incertae Sedis;Unknown Family;possible genus 03	1.47077e-06	0	3.34133e-05	1.22655e-05	4.33894e-06	0.00103339	0.00261873	0	0	0	3.12992e-05	0	4.23794e-05	0
Bacteria;Firmicutes;Bacilli;Bacillales;Bacillaceae;Bacillus	4.4123e-06	9.49532e-06	7.79643e-06	0	2.16947e-06	7.1409e-06	0	0	0	0	0	0	0	0
Bacteria;Firmicutes;Bacilli;Bacillales;Bacillaceae;Geobacillus	0	0	0	0	0	0	0	0	0	1.47471e-05	0	0	0	0
Bacteria;Firmicutes;Bacilli;Bacillales;Paenibacillaceae;Brevibacillus	0	0	0	0	0	1.02013e-06	0	0	0	0	0	0.00032447	0	0
Bacteria;Firmicutes;Bacilli;Bacillales;Paenibacillaceae;Paenibacillus	0	3.16511e-06	1.11378e-06	2.33044e-05	9.76261e-06	6.12077e-06	1.31993e-05	0	0	0	0	0	8.69321e-06	0
Bacteria;Firmicutes;Bacilli;Lactobacillales;Carnobacteriaceae;Granulicatella	0	0	0	0	0	2.04026e-06	0	0	0	3.68677e-05	0	0	0	0
Bacteria;Firmicutes;Bacilli;Lactobacillales;Lactobacillaceae;Lactobacillus	0	0	1.11378e-05	1.3492e-05	0	0	0	0	0	1.84339e-05	0	0	0	0
Bacteria;Firmicutes;Clostridia;Clostridiales;Family XII;Fusibacter	0	0	1.33653e-05	0	3.2542e-06	0.000136697	0.000315462	6.27356e-06	0	0	0	0	2.1733e-06	0
Bacteria;Firmicutes;Clostridia;Clostridiales;Lachnospiraceae;Incertae Sedis	0	0	2.22755e-06	0	1.08473e-06	0	0	0	0	0	0	6.45712e-05	0	0
Bacteria;Firmicutes;Clostridia;Clostridiales;Ruminococcaceae;Acetanaerobacterium	0	0	0	0	0	0	6.59963e-06	0	0	0	0	0	3.36862e-05	0
Bacteria;Fusobacteria;Fusobacteriia;Fusobacteriales;Fusobacteriaceae;Psychrilyobacter	1.76492e-05	1.58255e-05	0.00036866	2.45309e-06	4.33894e-06	0.0102951	0.0319277	6.11672e-05	0	0	0.000243438	3.22856e-06	0.000929087	0
Bacteria;Lentisphaerae;Lentisphaeria;Lentisphaerales;Lentisphaeraceae;Lentisphaera	0.000205907	0.000121857	8.68745e-05	0.000100577	0.000149693	2.85636e-05	5.14771e-05	0	0	0	3.12992e-05	0	0.000109752	1.81262e-05
Bacteria;Lentisphaerae;Lentisphaeria;Victivallales;Victivallaceae;Victivallis	1.47077e-06	6.33022e-06	3.34133e-06	4.90619e-06	7.26772e-05	0.000348884	0.000113514	4.07781e-05	0	0	0	0	4.34661e-06	7.66877e-05
Bacteria;Nitrospirae;Nitrospira;Nitrospirales;Nitrospiraceae;Nitrospira	4.4123e-05	4.74766e-06	4.23235e-05	0	0.00044908	1.02013e-06	3.95978e-06	0	0	0	0	0	2.1733e-06	0.000435028
Bacteria;Nitrospirae;Nitrospira;Nitrospirales;Nitrospiraceae;Thermodesulfovibrio	2.94153e-06	0	0	0	0	0	7.91956e-05	0	0	0	0	0	3.25996e-06	0
Bacteria;Planctomycetes;Phycisphaerae;Phycisphaerales;Phycisphaeraceae;JL-ETNP-F27	0.00478734	0.00349111	0.00332128	0.00251074	5.42367e-06	0.000149959	7.39159e-05	0	1.66418e-06	0	0	4.84284e-06	2.1733e-06	4.18296e-06
Bacteria;Planctomycetes;Phycisphaerae;Phycisphaerales;Phycisphaeraceae;Urania-1B-19 marine sediment group	0.000225027	0.000253209	0.000167066	0.000130014	0.000267929	1.02013e-05	1.7159e-05	0	0	0	0	0	3.25996e-06	8.92365e-05
Bacteria;Planctomycetes;Planctomycetacia;Brocadiales;Brocadiaceae;Candidatus Scalindua	0	0	0	0	0.000145354	0	0	0	0	0	0	0	0	8.36593e-06
Bacteria;Planctomycetes;Planctomycetacia;Planctomycetales;Planctomycetaceae;Pirellula	1.47077e-06	7.91277e-06	2.0048e-05	2.45309e-05	0.00073545	1.32617e-05	0.00017555	0	0	0	5.21653e-06	1.61428e-06	0.000361855	0.000468492
Bacteria;Proteobacteria;Alphaproteobacteria;Caulobacterales;Caulobacteraceae;Brevundimonas	0	3.16511e-06	0	0	5.42367e-06	0	0	0	0	1.10603e-05	0	0	0	0
Bacteria;Proteobacteria;Alphaproteobacteria;Caulobacterales;Hyphomonadaceae;Henriciella	2.94153e-06	0.00126604	0.000133653	1.83982e-05	7.05077e-05	0.000547809	0.000472534	0	0	0	0	0	4.34661e-06	0.000131066
Bacteria;Proteobacteria;Alphaproteobacteria;Caulobacterales;Hyphomonadaceae;Hyphomonas	0	0	8.9102e-06	0	4.23046e-05	0.000213207	0.000344501	0	0	0	0	0	0.000299916	5.85615e-05
Bacteria;Proteobacteria;Alphaproteobacteria;Kordiimonadales;Kordiimonadaceae;Kordiimonas	0	0	1.11378e-05	0	2.06099e-05	6.12077e-06	1.31993e-06	0	0	0	0	0	0	5.15899e-05
Bacteria;Proteobacteria;Alphaproteobacteria;Rhizobiales;Brucellaceae;Daeguia	0	0	0	0	0	0	0	0	0	1.10603e-05	0	0	0	0
Bacteria;Proteobacteria;Alphaproteobacteria;Rhizobiales;Brucellaceae;Ochrobactrum	0	0	0	0	0	0	0	0	0	0	0	1.45285e-05	3.25996e-06	2.78864e-06
Bacteria;Proteobacteria;Alphaproteobacteria;Rhizobiales;Hyphomicrobiaceae;Devosia	0	0	0	0	2.16947e-05	0	3.95978e-06	0	0	0	8.69422e-06	0	2.60796e-05	1.81262e-05
Bacteria;Proteobacteria;Alphaproteobacteria;Rhizobiales;Hyphomicrobiaceae;Hyphomicrobium	0	0	2.22755e-06	0	5.42367e-06	0	6.59963e-06	0	0	0	0	0	2.1733e-06	0
Bacteria;Proteobacteria;Alphaproteobacteria;Rhizobiales;Hyphomicrobiaceae;Pelagibacterium	0	0	0	0	2.49489e-05	0	6.59963e-06	0	0	0	0	0	2.1733e-06	4.60126e-05
Bacteria;Proteobacteria;Alphaproteobacteria;Rhizobiales;Hyphomicrobiaceae;Rhodomicrobium	0	0	0	0	2.06099e-05	0	0	0	0	0	0	0	0	2.78864e-05
Bacteria;Proteobacteria;Alphaproteobacteria;Rhizobiales;Methylocystaceae;Pleomorphomonas	0	0	0	0	0	0	0	0	0	0	0	0	5.43326e-06	0
Bacteria;Proteobacteria;Alphaproteobacteria;Rhizobiales;Phyllobacteriaceae;Ahrensia	0	0	0	0	5.42367e-06	0	0	0	0	0	0	0	2.93396e-05	0
Bacteria;Proteobacteria;Alphaproteobacteria;Rhizobiales;Phyllobacteriaceae;Aquamicrobium	0	0	0	0	2.16947e-05	0	0	0	0	0	2.43438e-05	0	6.84591e-05	5.57728e-06
Bacteria;Proteobacteria;Alphaproteobacteria;Rhizobiales;Phyllobacteriaceae;Hoeflea	0	0	0	0	0.000129083	1.02013e-06	0	0	0	0	0	0	0.000111925	1.39432e-06
Bacteria;Proteobacteria;Alphaproteobacteria;Rhizobiales;Phyllobacteriaceae;Mesorhizobium	0	0	0	0	5.42367e-06	1.02013e-06	1.31993e-06	0	0	9.21693e-06	3.47769e-06	6.29569e-05	4.6726e-05	0
Bacteria;Proteobacteria;Alphaproteobacteria;Rhizobiales;Phyllobacteriaceae;Nitratireductor	0	0	0	3.67964e-06	9.76261e-06	7.1409e-06	9.23948e-05	0	0	0	0.000139107	0	3.91195e-05	6.9716e-06
Bacteria;Proteobacteria;Alphaproteobacteria;Rhizobiales;Phyllobacteriaceae;Phyllobacterium	5.88306e-06	0	2.22755e-06	6.13273e-06	0	0	0	0	0	0	0	0	0	4.18296e-06
Bacteria;Proteobacteria;Alphaproteobacteria;Rhizobiales;Phyllobacteriaceae;Pseudaminobacter	0	0	0	0	0	0	0	0	0	0	0	0	2.1733e-06	0
Bacteria;Proteobacteria;Alphaproteobacteria;Rhizobiales;Rhizobiales Incertae Sedis;Rhizomicrobium	0	3.16511e-06	0	0	0	0	0	0	0	0	0	0	0	2.78864e-06
Bacteria;Proteobacteria;Alphaproteobacteria;Rhizobiales;Rhodobiaceae;Anderseniella	0	0	3.34133e-06	0	3.2542e-06	0	0	0	0	0	0	0	0	0
Bacteria;Proteobacteria;Alphaproteobacteria;Rhodobacterales;Rhodobacteraceae;Candidatus Planktomarina (DC5-80-3 lineage)	0	0	0	0	3.2542e-06	0	0	0	0	0	0	0	0	3.34637e-05
Bacteria;Proteobacteria;Alphaproteobacteria;Rhodobacterales;Rhodobacteraceae;Celeribacter	0	0	0	0	2.16947e-06	0	0	0	0	0	0	0	0	2.78864e-06
Bacteria;Proteobacteria;Alphaproteobacteria;Rhodobacterales;Rhodobacteraceae;Defluviimonas	0	8.70405e-05	2.56168e-05	1.22655e-06	5.85756e-05	3.06038e-05	6.86362e-05	3.13678e-06	0	0	0.000231266	1.61428e-06	0.000427054	0.000147798
Bacteria;Proteobacteria;Alphaproteobacteria;Rhodobacterales;Rhodobacteraceae;Dinoroseobacter	0	0	0	0	2.16947e-06	0	0	0	0	0	1.91273e-05	0	4.78127e-05	0
Bacteria;Proteobacteria;Alphaproteobacteria;Rhodobacterales;Rhodobacteraceae;Jannaschia	0	0	0	0	2.16947e-06	0	0	0	0	0	2.08661e-05	0	5.43326e-06	0
Bacteria;Proteobacteria;Alphaproteobacteria;Rhodobacterales;Rhodobacteraceae;Lentibacter	0	0	0	0	0	0	0	0	0	0	0	0	8.69321e-06	0
Bacteria;Proteobacteria;Alphaproteobacteria;Rhodobacterales;Rhodobacteraceae;Litoreibacter	0	0	0	0	0	0	0	0	0	0	0	0	3.25996e-06	0
Bacteria;Proteobacteria;Alphaproteobacteria;Rhodobacterales;Rhodobacteraceae;Loktanella	0	0	7.68505e-05	0	0	0	1.31993e-06	0	0	0	4.17322e-05	0	2.82529e-05	2.78864e-06
Bacteria;Proteobacteria;Alphaproteobacteria;Rhodobacterales;Rhodobacteraceae;Maritimibacter	0	0	1.11378e-06	0	0	0	0	0	0	0	0	0	0	6.9716e-06
Bacteria;Proteobacteria;Alphaproteobacteria;Rhodobacterales;Rhodobacteraceae;Oceanicella	0	0	0	0	0	0	0	0	0	0	0	0	3.25996e-06	0
Bacteria;Proteobacteria;Alphaproteobacteria;Rhodobacterales;Rhodobacteraceae;Oceanicola	0	0	0.000431031	4.90619e-06	0	0.00339091	0.000154431	0	0	0	0	3.22856e-06	0	0
Bacteria;Proteobacteria;Alphaproteobacteria;Rhodobacterales;Rhodobacteraceae;Oceaniovalibus	0	4.74766e-06	6.4599e-05	0	0	0	0	0	0	0	0	0	3.25996e-06	0
Bacteria;Proteobacteria;Alphaproteobacteria;Rhodobacterales;Rhodobacteraceae;Octadecabacter	0	0	0	0	6.5084e-06	0	9.23948e-06	0	0	0	0.000306036	0	0.000185817	2.78864e-06
Bacteria;Proteobacteria;Alphaproteobacteria;Rhodobacterales;Rhodobacteraceae;Paracoccus	3.38276e-05	0.0240833	0.00093223	0.000975105	0	2.75435e-05	2.90384e-05	0	0	0.000164061	0	0	3.25996e-06	0
Bacteria;Proteobacteria;Alphaproteobacteria;Rhodobacterales;Rhodobacteraceae;Pelagicola	0	0	4.23235e-05	0	0.000107389	2.04026e-06	0.000147832	0	0	0	0.000140846	0	0.000896488	2.92807e-05
Bacteria;Proteobacteria;Alphaproteobacteria;Rhodobacterales;Rhodobacteraceae;Phaeobacter	0	1.4243e-05	7.12816e-05	0	0	0.000328481	1.97989e-05	3.13678e-06	0	0	0	0	5.43326e-06	8.36593e-06
Bacteria;Proteobacteria;Alphaproteobacteria;Rhodobacterales;Rhodobacteraceae;Planktotalea	0	0	0	0	0	0	0	0	0	0	1.39107e-05	0	0	0
Bacteria;Proteobacteria;Alphaproteobacteria;Rhodobacterales;Rhodobacteraceae;Profundibacterium	0	0	0	0	3.2542e-06	0	0	0	0	0	0	0	0	0
Bacteria;Proteobacteria;Alphaproteobacteria;Rhodobacterales;Rhodobacteraceae;Pseudovibrio	0	0	0	0	1.08473e-05	0	0	0	0	0	2.95603e-05	0	9.77987e-06	2.78864e-06
Bacteria;Proteobacteria;Alphaproteobacteria;Rhodobacterales;Rhodobacteraceae;Rhodovulum	0	0	0	0	5.20672e-05	2.85636e-05	5.93967e-05	0	0	0	1.73884e-06	0	7.60656e-06	8.22649e-05
Bacteria;Proteobacteria;Alphaproteobacteria;Rhodobacterales;Rhodobacteraceae;Roseibacterium	0	0	5.56888e-06	0	0	0	0	0	0	0	0	0	0	6.9716e-06
Bacteria;Proteobacteria;Alphaproteobacteria;Rhodobacterales;Rhodobacteraceae;Roseovarius	7.64798e-05	9.49532e-06	3.00719e-05	0	3.2542e-06	5.30467e-05	3.69579e-05	0	1.66418e-06	0	2.95603e-05	0	3.36862e-05	3.4858e-05
Bacteria;Proteobacteria;Alphaproteobacteria;Rhodobacterales;Rhodobacteraceae;Rubellimicrobium	0	0	0	0	0	0	0	0	0	1.47471e-05	0	0	0	0
Bacteria;Proteobacteria;Alphaproteobacteria;Rhodobacterales;Rhodobacteraceae;Ruegeria	8.67752e-05	0	0.00116501	0	1.08473e-05	9.38518e-05	7.2596e-05	9.41033e-06	1.66418e-06	0	0.000130413	6.45712e-06	0.000124965	1.25489e-05
Bacteria;Proteobacteria;Alphaproteobacteria;Rhodobacterales;Rhodobacteraceae;Stappia	0	0	0	0	0	0	0	0	0	0	1.73884e-05	0	0	0
Bacteria;Proteobacteria;Alphaproteobacteria;Rhodobacterales;Rhodobacteraceae;Sulfitobacter	7.35383e-06	0	2.22755e-06	0	0	1.02013e-06	3.03583e-05	0	0	0	1.73884e-06	0	8.69321e-06	2.50978e-05
Bacteria;Proteobacteria;Alphaproteobacteria;Rhodobacterales;Rhodobacteraceae;Tateyamaria	0	1.58255e-06	0.00122181	0	3.2542e-05	0	0	0	1.66418e-06	0	0	1.61428e-06	3.25996e-06	0.000778031
Bacteria;Proteobacteria;Alphaproteobacteria;Rhodobacterales;Rhodobacteraceae;Thalassobius	0	0	1.78204e-05	6.13273e-06	0	4.08051e-06	1.31993e-06	0	0	0	8.69422e-06	0	5.43326e-06	0
Bacteria;Proteobacteria;Alphaproteobacteria;Rhodobacterales;Rhodobacteraceae;Tropicimonas	0	0	0.00022721	0	3.2542e-06	0	0	0	0	0	0	0	0	1.25489e-05
Bacteria;Proteobacteria;Alphaproteobacteria;Rhodospirillales;Rhodospirillaceae;AEGEAN-169 marine group	0.0100644	0.0153872	0.00629506	0.0097719	2.49489e-05	0.00023565	0.000219108	0	0	1.84339e-06	1.73884e-06	6.45712e-06	0.000464	6.9716e-06
Bacteria;Proteobacteria;Alphaproteobacteria;Rhodospirillales;Rhodospirillaceae;Azospirillum	0	0	0	0	0	0	0	0	0	0	0	0	0	2.78864e-06
Bacteria;Proteobacteria;Alphaproteobacteria;Rhodospirillales;Rhodospirillaceae;Dongia	0	0	0	0	3.2542e-06	0	0	0	0	0	0	0	0	0
Bacteria;Proteobacteria;Alphaproteobacteria;Rhodospirillales;Rhodospirillaceae;OM75 clade	2.94153e-05	3.48162e-05	2.78444e-05	1.3492e-05	0	0	1.31993e-06	0	0	0	0	0	0	2.78864e-06
Bacteria;Proteobacteria;Alphaproteobacteria;Rhodospirillales;Rhodospirillaceae;Pelagibius	0	0	3.22995e-05	0	7.59314e-06	0	0	0	0	0	0	0	0	1.25489e-05
Bacteria;Proteobacteria;Alphaproteobacteria;Rhodospirillales;Rhodospirillaceae;Tistlia	0	0	0	0	0	0	0	0	0	0	0	0	0	4.18296e-06
Bacteria;Proteobacteria;Alphaproteobacteria;Rhodospirillales;Rhodospirillales Incertae Sedis;Candidatus Alysiosphaera	0	0	0	0	0	0	1.05594e-05	0	0	0	0	0	2.1733e-06	6.9716e-06
Bacteria;Proteobacteria;Alphaproteobacteria;Rickettsiales;Holosporaceae;Candidatus Gortzia	0	0	0	0	0	0	0	0	0	0	0	0	1.62998e-05	0
Bacteria;Proteobacteria;Alphaproteobacteria;Rickettsiales;Holosporaceae;Holospora	0	0	0	0	0	0	9.23948e-06	0	0	0	0	0	3.25996e-06	4.18296e-06
Bacteria;Proteobacteria;Alphaproteobacteria;Rickettsiales;Rickettsiaceae;Orientia	0	0	0	0	0	0	1.31993e-06	0	0	0	0	0	6.51991e-06	0
Bacteria;Proteobacteria;Alphaproteobacteria;Rickettsiales;Rickettsiales Incertae Sedis;Candidatus Captivus	0	0	3.34133e-06	0	2.38641e-05	2.04026e-06	3.16782e-05	0	0	0	8.69422e-06	0	3.80328e-05	2.78864e-06
Bacteria;Proteobacteria;Alphaproteobacteria;Rickettsiales;Rickettsiales Incertae Sedis;Candidatus Hepatincola	0	0	3.34133e-06	0	8.67787e-06	0	0	0	0	0	0	0	0	4.18296e-06
Bacteria;Proteobacteria;Alphaproteobacteria;Rickettsiales;Rickettsiales Incertae Sedis;Candidatus Lariskella	1.76492e-05	0	0	0	3.03726e-05	0	1.05594e-05	0	0	0	3.47769e-06	0	9.77987e-06	1.39432e-05
Bacteria;Proteobacteria;Alphaproteobacteria;Rickettsiales;Rickettsiales Incertae Sedis;Candidatus Odyssella	0	1.10779e-05	0	0	4.33894e-06	1.02013e-06	3.95978e-06	0	0	0	3.47769e-06	0	4.34661e-06	1.67319e-05
Bacteria;Proteobacteria;Alphaproteobacteria;SB1-18;carbazole-degrading bacterium OC13S;carbazole-degrading bacterium OC13S	0	0	0	0	0	0	0	0	0	0	0	0	0	2.78864e-06
Bacteria;Proteobacteria;Alphaproteobacteria;Sneathiellales;Sneathiellaceae;Sneathiella	4.4123e-05	2.21558e-05	1.89342e-05	1.22655e-05	2.60336e-05	0	2.37587e-05	0	0	0	3.47769e-06	0	6.08525e-05	0.000158953
Bacteria;Proteobacteria;Alphaproteobacteria;Sphingomonadales;Erythrobacteraceae;Altererythrobacter	0.0106042	0.0137413	0.0164883	0.00403779	5.42367e-06	0.00190866	0.00166707	3.13678e-06	0	5.53016e-06	0	1.77571e-05	5.43326e-06	4.18296e-06
Bacteria;Proteobacteria;Alphaproteobacteria;Sphingomonadales;Erythrobacteraceae;Erythrobacter	9.85413e-05	0.000110779	0.000214959	1.96248e-05	1.08473e-05	3.26441e-05	0.000100314	0	0	0	0	0	6.51991e-06	0
Bacteria;Proteobacteria;Alphaproteobacteria;Sphingomonadales;Sphingomonadaceae;Novosphingobium	8.82459e-06	0	2.56168e-05	0	0.000229964	1.12214e-05	1.58391e-05	0	0	0	0	0	5.43326e-06	6.9716e-06
Bacteria;Proteobacteria;Alphaproteobacteria;Sphingomonadales;Sphingomonadaceae;Sphingomonas	2.94153e-06	0.000129769	6.68265e-06	1.22655e-06	0	4.59058e-05	1.8479e-05	0	0	7.37354e-06	0	0.000188871	2.1733e-06	1.39432e-06
Bacteria;Proteobacteria;Alphaproteobacteria;Sphingomonadales;Sphingomonadaceae;Sphingopyxis	0	1.58255e-05	1.11378e-05	0	6.5084e-06	4.89662e-05	7.91956e-06	0	0	0	0	0	0	0
Bacteria;Proteobacteria;Alphaproteobacteria;Sphingomonadales;Sphingomonadales Incertae Sedis;Kiloniella	0	0	0	0	0	0	0	0	0	0	0	0	3.25996e-06	0
Bacteria;Proteobacteria;Betaproteobacteria;Burkholderiales;Burkholderiaceae;Cupriavidus	7.35383e-05	7.91277e-06	0	0	0	0	0	0	0	1.84339e-06	0	0	0	1.39432e-06
Bacteria;Proteobacteria;Betaproteobacteria;Burkholderiales;Comamonadaceae;Variovorax	8.38336e-05	2.37383e-05	6.23714e-05	1.10389e-05	0	0	2.63985e-06	0	0	0	0	1.45285e-05	0	1.39432e-05
Bacteria;Proteobacteria;Betaproteobacteria;Burkholderiales;Oxalobacteraceae;Massilia	2.5003e-05	0.000128187	7.79643e-06	1.47186e-05	2.16947e-06	3.06038e-06	2.63985e-06	0	0	0	0	0	0	0
Bacteria;Proteobacteria;Betaproteobacteria;Hydrogenophilales;Hydrogenophilaceae;Sulfuricella	0	0	0	0	9.54566e-05	0	0	0	0	0	0	0	0	1.67319e-05
Bacteria;Proteobacteria;Betaproteobacteria;Hydrogenophilales;Hydrogenophilaceae;Tepidiphilus	0	0	0	0	0	0	0	0	0	7.37354e-06	0	0	0	0
Bacteria;Proteobacteria;Betaproteobacteria;Hydrogenophilales;Hydrogenophilaceae;Thiobacillus	2.94153e-06	0	3.34133e-06	0	0	0	1.45192e-05	0	0	0	6.95537e-06	0	0.000122792	0
Bacteria;Proteobacteria;Betaproteobacteria;Neisseriales;Neisseriaceae;Aquitalea	0	0	0	0	0	0	0	0	0	7.37354e-06	0	0	0	0
Bacteria;Proteobacteria;Betaproteobacteria;Nitrosomonadales;Gallionellaceae;Candidatus Nitrotoga	0	0	0	0	0	0	5.27971e-06	0	0	0	0	0	2.1733e-06	0
Bacteria;Proteobacteria;Betaproteobacteria;Nitrosomonadales;Nitrosomonadaceae;Nitrosospira	1.17661e-05	0	1.67066e-05	0	3.2542e-06	0	0	0	0	0	0	0	0	1.25489e-05
Bacteria;Proteobacteria;Betaproteobacteria;Rhodocyclales;Rhodocyclaceae;Azospira	0	0	0	0	2.16947e-06	0	0	0	0	0	0	0	0	0
Bacteria;Proteobacteria;Betaproteobacteria;Rhodocyclales;Rhodocyclaceae;Propionivibrio	0	0	0	0	0	0	0	0	0	0	0	0	2.1733e-06	0
Bacteria;Proteobacteria;Deltaproteobacteria;Bdellovibrionales;Bacteriovoracaceae;Bacteriovorax	1.02954e-05	5.38068e-05	3.11857e-05	1.83982e-05	9.22024e-05	0.000277475	9.10749e-05	0	0	0	6.95537e-06	0	1.62998e-05	6.9716e-06
Bacteria;Proteobacteria;Deltaproteobacteria;Bdellovibrionales;Bacteriovoracaceae;Deferrisoma	0	0	0	0	0	1.32617e-05	7.91956e-06	0	0	0	8.69422e-06	0	2.1733e-06	0
Bacteria;Proteobacteria;Deltaproteobacteria;Bdellovibrionales;Bacteriovoracaceae;HotSeep-1	0	0	0	0	0	5.10064e-05	3.95978e-06	7.84194e-06	0	0	0	0	0	0
Bacteria;Proteobacteria;Deltaproteobacteria;Bdellovibrionales;Bacteriovoracaceae;Peredibacter	5.44183e-05	5.85545e-05	4.00959e-05	5.88743e-05	0.000606366	0.000116295	0.000244186	0	0	0	0.00013563	0	0.000139091	5.99558e-05
Bacteria;Proteobacteria;Deltaproteobacteria;Bdellovibrionales;Bdellovibrionaceae;Bdellovibrio	7.35383e-06	9.49532e-06	0.000502313	6.13273e-06	0.000763653	0.000762036	0.000575488	0.000439149	9.98511e-06	0	0.000415584	1.61428e-06	0.000346642	0.000550757
Bacteria;Proteobacteria;Deltaproteobacteria;Desulfobacterales;Desulfobacteraceae;Desulfobacula	0	0	1.11378e-06	0	0	4.28454e-05	0.000335261	0	0	0	1.21719e-05	0	8.47588e-05	0
Bacteria;Proteobacteria;Deltaproteobacteria;Desulfobacterales;Desulfobacteraceae;Desulfosalsimonas	0	0	0	0	0	0	0	0	0	0	0	0	3.25996e-06	0
Bacteria;Proteobacteria;Deltaproteobacteria;Desulfobacterales;Desulfobacteraceae;SEEP-SRB1	0	0	0	0	0	2.34629e-05	0.00018347	1.56839e-06	0	0.000158531	5.21653e-06	0	4.45527e-05	0
Bacteria;Proteobacteria;Deltaproteobacteria;Desulfobacterales;Desulfobacteraceae;Sva0081 sediment group	0	0	0	0	0	0	6.07166e-05	0	0	0	6.95537e-06	0	1.19532e-05	0
Bacteria;Proteobacteria;Deltaproteobacteria;Desulfobacterales;Desulfobulbaceae;Desulfofustis	0	0	0	0	0	0	0	0	0	0	6.95537e-06	0	0	0
Bacteria;Proteobacteria;Deltaproteobacteria;Desulfobacterales;Desulfobulbaceae;Desulfopila	0	0	0	0	0	0	2.63985e-06	0	0	0	3.47769e-06	0	7.60656e-06	0
Bacteria;Proteobacteria;Deltaproteobacteria;Desulfobacterales;Desulfobulbaceae;Desulfurivibrio	0	0	0	0	0	6.12077e-06	0	0	0	0	6.95537e-06	0	4.9986e-05	0
Bacteria;Proteobacteria;Deltaproteobacteria;Desulfobacterales;Desulfobulbaceae;SEEP-SRB2	0	0	5.56888e-06	0	0	0.000338683	0.000149152	1.88207e-05	0	0.000481124	0	0	3.25996e-06	0
Bacteria;Proteobacteria;Deltaproteobacteria;Desulfovibrionales;Desulfohalobiaceae;Desulfonatronospira	0	0	0	0	0	0	0	0	0	1.10603e-05	0	0	0	0
Bacteria;Proteobacteria;Deltaproteobacteria;Desulfovibrionales;Desulfovibrionaceae;Desulfovibrio	0	0	3.34133e-06	0	2.27794e-05	2.65233e-05	1.7159e-05	0	0	0	5.21653e-06	0	3.58595e-05	0
Bacteria;Proteobacteria;Deltaproteobacteria;Desulfuromonadales;Desulfuromonadaceae;Desulfuromonas	0	0	1.0024e-05	0	0	5.20265e-05	0.00017423	0	0	0	6.95537e-06	0	5.43326e-06	0
Bacteria;Proteobacteria;Deltaproteobacteria;Desulfuromonadales;Desulfuromonadaceae;Malonomonas	0	0	0	0	0	1.02013e-06	1.45192e-05	0	0	0	8.69422e-06	0	3.25996e-06	0
Bacteria;Proteobacteria;Deltaproteobacteria;Desulfuromonadales;Desulfuromonadaceae;Pelobacter	0	0	0	0	0	2.44831e-05	0.00035902	1.88207e-05	0	0	0.000149541	0	6.95457e-05	0
Bacteria;Proteobacteria;Deltaproteobacteria;Desulfuromonadales;Geobacteraceae;Geobacter	1.61784e-05	0	0	0	3.6881e-05	2.04026e-06	1.31993e-05	0	0	0	0	0	2.39063e-05	8.36593e-06
Bacteria;Proteobacteria;Deltaproteobacteria;Desulfuromonadales;Geobacteraceae;Geothermobacter	2.94153e-06	0	5.56888e-06	0	0	3.06038e-06	2.90384e-05	0	0	0	5.21653e-06	0	4.34661e-06	0
Bacteria;Proteobacteria;Deltaproteobacteria;Myxococcales;Nannocystaceae;Enhygromyxa	0	0	8.9102e-06	0	3.57962e-05	0	0	0	0	0	0	0	1.08665e-06	0.000515899
Bacteria;Proteobacteria;Deltaproteobacteria;Myxococcales;Phaselicystidaceae;Phaselicystis	3.67691e-05	6.33022e-06	8.9102e-06	0	3.2542e-06	1.42818e-05	2.90384e-05	0	0	0	5.21653e-06	0	2.1733e-06	0
Bacteria;Proteobacteria;Deltaproteobacteria;Myxococcales;Sandaracinaceae;myxobacterium SIBN-17	0	0	0	0	0	0	0	0	0	0	0	0	6.51991e-06	0
Bacteria;Proteobacteria;Deltaproteobacteria;Syntrophobacterales;Syntrophaceae;Desulfomonile	0	0	0	0	0	0	2.63985e-06	0	0	0	3.47769e-06	0	0	0
Bacteria;Proteobacteria;Deltaproteobacteria;Syntrophobacterales;Syntrophaceae;Smithella	0	0	0	0	1.6271e-05	0	1.97989e-05	0	0	0	0	0	2.1733e-06	1.39432e-06
Bacteria;Proteobacteria;Deltaproteobacteria;Syntrophobacterales;Syntrophobacteraceae;Thermodesulforhabdus	0	0	0	0	0	3.46844e-05	5.27971e-06	0	0	0.000949344	3.47769e-06	0	0	0
Bacteria;Proteobacteria;Epsilonproteobacteria;Campylobacterales;Hydrogenimonaceae;Hydrogenimonas	1.47077e-06	0	1.22515e-05	0	0	0.000484561	0.00207624	0	1.33135e-05	0	3.47769e-06	0	0	0
Bacteria;Proteobacteria;Epsilonproteobacteria;Nautiliales;Nautiliaceae;Lebetimonas	0	0	7.12816e-05	4.90619e-06	0	0.00514553	0.000101634	0.000868887	6.3239e-05	3.68677e-05	0	1.61428e-06	0	0
Bacteria;Proteobacteria;Epsilonproteobacteria;Nautiliales;Nautiliaceae;Nitratiruptor	0	0	0.000373115	3.67964e-06	1.08473e-06	0.00424169	0.000203269	7.84194e-06	0.000284576	0	5.21653e-06	0	0	0
Bacteria;Proteobacteria;Gammaproteobacteria;Acidithiobacillales;Acidithiobacillaceae;Acidithiobacillus	0	0	0	0	1.73557e-05	0	0	0	0	0	0	0	0	1.25489e-05
Bacteria;Proteobacteria;Gammaproteobacteria;Aeromonadales;Aeromonadaceae;Aeromonas	0	0	0	0	0	9.18115e-06	2.63985e-06	0	0	0	0	3.22856e-06	0	0
Bacteria;Proteobacteria;Gammaproteobacteria;Alteromonadales;Alteromonadaceae;Aestuariibacter	0.000108837	3.16511e-06	0.00041878	3.67964e-05	0	0.000103033	1.18793e-05	0	1.16493e-05	0	0	1.61428e-06	2.1733e-06	0
Bacteria;Proteobacteria;Gammaproteobacteria;Alteromonadales;Alteromonadaceae;Alteromonas	0.0473822	0.00266502	0.0370475	0.0838296	1.19321e-05	0.0291165	0.00397034	1.09787e-05	1.49777e-05	3.68677e-06	3.47769e-06	3.55142e-05	3.36862e-05	1.25489e-05
Bacteria;Proteobacteria;Gammaproteobacteria;Alteromonadales;Alteromonadaceae;BD1-7 clade	0.000110307	3.63987e-05	1.33653e-05	2.08513e-05	3.36268e-05	3.06038e-06	0.000326022	0	0	0	5.21653e-06	0	9.77987e-06	1.11546e-05
Bacteria;Proteobacteria;Gammaproteobacteria;Alteromonadales;Alteromonadaceae;C1-B045	0	0	3.34133e-06	0	1.08473e-05	0	3.95978e-06	0	0	0	0	0	0	0
Bacteria;Proteobacteria;Gammaproteobacteria;Alteromonadales;Alteromonadaceae;Dasania	2.5003e-05	0.000156673	7.79643e-05	3.67964e-05	4.33894e-06	3.06038e-06	0.000170271	0	0	0	5.91207e-05	0	0.000406408	1.39432e-05
Bacteria;Proteobacteria;Gammaproteobacteria;Alteromonadales;Alteromonadaceae;Gilvimarinus	0	0	0	0	3.2542e-06	0	0	0	0	0	0	0	0	0
Bacteria;Proteobacteria;Gammaproteobacteria;Alteromonadales;Alteromonadaceae;Haliea	2.94153e-06	0	2.45031e-05	6.13273e-06	0.000564062	3.06038e-06	0.00017423	0	0	0	1.73884e-06	0	0.000149958	5.57728e-06
Bacteria;Proteobacteria;Gammaproteobacteria;Alteromonadales;Alteromonadaceae;Marinobacter	0.0078583	0.00216177	0.0185533	0.0096333	3.47115e-05	0.012975	0.0491633	4.70517e-06	4.99255e-06	2.58074e-05	5.21653e-06	1.93714e-05	1.30398e-05	8.36593e-06
Bacteria;Proteobacteria;Gammaproteobacteria;Alteromonadales;Alteromonadaceae;Microbulbifer	0	0	1.44791e-05	0	0	0	0	0	0	0	0	0	2.1733e-06	0
Bacteria;Proteobacteria;Gammaproteobacteria;Alteromonadales;Alteromonadaceae;Porticoccus	0	0	0.000619259	0	0	0	3.95978e-06	0	0	0	0	1.61428e-06	4.34661e-06	0
Bacteria;Proteobacteria;Gammaproteobacteria;Alteromonadales;Alteromonadaceae;Spongiibacter	0	3.16511e-06	0.000298492	0	3.2542e-05	0.00122517	2.63985e-06	0	0	0	0	1.61428e-06	2.4993e-05	1.53375e-05
Bacteria;Proteobacteria;Gammaproteobacteria;Alteromonadales;Colwelliaceae;Colwellia	0.000342688	0.000104449	0.000158156	6.62335e-05	0.000932871	0.000570252	0.0032193	0.000809289	0.000113165	0	5.39041e-05	0	2.60796e-05	0.000281653
Bacteria;Proteobacteria;Gammaproteobacteria;Alteromonadales;Idiomarinaceae;Idiomarina	0.0997826	0.013947	0.157957	0.0565107	3.14573e-05	0.00543014	0.00184922	0	8.32092e-06	5.53016e-06	0	0.000156585	8.04122e-05	3.4858e-05
Bacteria;Proteobacteria;Gammaproteobacteria;Alteromonadales;Pseudoalteromonadaceae;Pseudoalteromonas	0.000391224	4.74766e-06	0.00089102	0.00111493	4.77283e-05	0.00172912	0.000220428	6.27356e-06	4.99255e-06	0	1.73884e-06	1.61428e-06	1.08665e-06	4.18296e-06
Bacteria;Proteobacteria;Gammaproteobacteria;Alteromonadales;Psychromonadaceae;Psychromonas	1.32369e-05	1.58255e-06	0.000220528	2.45309e-06	3.2542e-06	0.00777236	0.00230459	0	0	0	5.21653e-06	1.61428e-06	6.51991e-06	2.64921e-05
Bacteria;Proteobacteria;Gammaproteobacteria;Alteromonadales;Shewanellaceae;Shewanella	3.97107e-05	8.8623e-05	2.0048e-05	8.09521e-05	0	2.24428e-05	6.59963e-06	3.13678e-06	0	0	0	0	0	9.76025e-06
Bacteria;Proteobacteria;Gammaproteobacteria;BD7-8 marine group;endosymbiont of Ifremeria nautilei;endosymbiont of Ifremeria nautilei	0	0	0	0	0	0	2.63985e-06	0	0	0	5.21653e-06	0	7.60656e-06	0
Bacteria;Proteobacteria;Gammaproteobacteria;BD7-8 marine group;gamma proteobacterium Hiromi1;gamma proteobacterium Hiromi1	0	0	0	0	0	0	3.95978e-06	0	0	0	2.2605e-05	0	0	0
Bacteria;Proteobacteria;Gammaproteobacteria;Chromatiales;Chromatiaceae;Halochromatium	0	0	0	0	2.16947e-06	2.04026e-06	0	0	0	0	0	0	0	0
Bacteria;Proteobacteria;Gammaproteobacteria;Chromatiales;Chromatiaceae;Thiohalocapsa	0	0	0	0	2.16947e-06	0	0	0	0	0	0	0	0	0
Bacteria;Proteobacteria;Gammaproteobacteria;Chromatiales;Ectothiorhodospiraceae;Aquisalimonas	0	0	3.34133e-06	0	0	0	0	0	0	0	0	1.61428e-06	0	5.57728e-06
Bacteria;Proteobacteria;Gammaproteobacteria;Chromatiales;Ectothiorhodospiraceae;Spiribacter	0	0	0	0	0	0	0	0	0	0	0	0	0	1.81262e-05
Bacteria;Proteobacteria;Gammaproteobacteria;Chromatiales;Ectothiorhodospiraceae;Thiorhodospira	0	0	2.22755e-06	0	0	0	2.50786e-05	0	0	0	1.73884e-06	0	8.69321e-05	0
Bacteria;Proteobacteria;Gammaproteobacteria;Gammaproteobacteria Incertae Sedis;Unknown Family;Sedimenticola	8.82459e-06	3.16511e-06	2.0048e-05	6.13273e-06	7.91856e-05	4.89662e-05	0.000260026	2.35258e-05	0	0	0.000109547	0	0.000469434	7.3899e-05
Bacteria;Proteobacteria;Gammaproteobacteria;Gammaproteobacteria Incertae Sedis;Unknown Family;Thiohalomonas	0	0	5.56888e-06	0	0.000575994	0.000328481	0.000323382	0	0	0	0	0	2.82529e-05	4.18296e-06
Bacteria;Proteobacteria;Gammaproteobacteria;Legionellales;Coxiellaceae;Aquicella	0	0	0	0	1.08473e-06	6.12077e-06	9.23948e-06	0	0	0	0	0	0	0.000100391
Bacteria;Proteobacteria;Gammaproteobacteria;Legionellales;Coxiellaceae;Coxiella	0.000430934	0.00101442	0.000321881	0.000371644	0.000254912	1.73422e-05	1.97989e-05	0	0	0	0	1.61428e-06	5.54192e-05	0.000197994
Bacteria;Proteobacteria;Gammaproteobacteria;Legionellales;Legionellaceae;Legionella	0	6.33022e-06	0	0	9.76261e-06	2.04026e-06	1.97989e-05	0	0	0	0	0	3.25996e-06	2.78864e-05
Bacteria;Proteobacteria;Gammaproteobacteria;Methylococcales;Crenotrichaceae;Crenothrix	0	0	0	0	0	0	4.75174e-05	0	0	0	4.34711e-05	0	3.15129e-05	0
Bacteria;Proteobacteria;Gammaproteobacteria;Methylococcales;Methylococcaceae;Methylobacter	0	0	3.00719e-05	0	0	0	0	0	0	0	6.95537e-06	0	0	0
Bacteria;Proteobacteria;Gammaproteobacteria;Methylococcales;Methylococcaceae;Methylocaldum	1.912e-05	3.16511e-05	0	1.83982e-05	0	5.40668e-05	2.24387e-05	0	0	0	0	0	4.45527e-05	0
Bacteria;Proteobacteria;Gammaproteobacteria;Methylococcales;Methylococcaceae;Methylomonas	0	0	0	0	0	0	3.16782e-05	0	0	0	1.04331e-05	1.61428e-06	2.39063e-05	0
Bacteria;Proteobacteria;Gammaproteobacteria;Oceanospirillales;Alcanivoracaceae;Alcanivorax	0.00851573	0.0360712	0.0218356	0.00803266	5.42367e-06	0.0221021	0.00798687	0	0	0	0	2.74428e-05	1.41265e-05	2.78864e-06
Bacteria;Proteobacteria;Gammaproteobacteria;Oceanospirillales;Hahellaceae;Kistimonas	0	1.58255e-06	5.90301e-05	0	2.71183e-05	0.0043284	0.00447191	0	0	0	2.78215e-05	0	4.88993e-05	0
Bacteria;Proteobacteria;Gammaproteobacteria;Oceanospirillales;Halomonadaceae;Chromohalobacter	1.02954e-05	9.81183e-05	6.68265e-06	0.170068	0	9.18115e-05	1.45192e-05	0	0	0	0	0	2.39063e-05	0
Bacteria;Proteobacteria;Gammaproteobacteria;Oceanospirillales;Halomonadaceae;Halomonas	0.13952	0.268396	0.110267	0.0674773	3.03726e-05	0.00889144	0.000328662	4.54833e-05	0	3.50243e-05	3.47769e-06	0.000117842	6.73724e-05	3.20694e-05
Bacteria;Proteobacteria;Gammaproteobacteria;Oceanospirillales;Litoricolaceae;Litoricola	2.05907e-05	7.91277e-06	3.34133e-06	3.67964e-06	1.95252e-05	0	2.63985e-06	0	0	0	0	0	2.1733e-06	1.11546e-05
Bacteria;Proteobacteria;Gammaproteobacteria;Oceanospirillales;Oceanospirillaceae;Marinobacterium	0	3.16511e-06	0.00316312	0	3.79657e-05	4.89662e-05	1.18793e-05	0	0	0	0	4.84284e-06	1.41265e-05	4.18296e-06
Bacteria;Proteobacteria;Gammaproteobacteria;Oceanospirillales;Oceanospirillaceae;Marinomonas	0	0	2.22755e-06	0	2.16947e-06	0	0	0	0	0	0	0	0	0
Bacteria;Proteobacteria;Gammaproteobacteria;Oceanospirillales;Oceanospirillaceae;Neptuniibacter	0	0	0.000807487	0	0	0	0	0	0	0	0	0	2.1733e-06	1.39432e-06
Bacteria;Proteobacteria;Gammaproteobacteria;Oceanospirillales;Oceanospirillaceae;Neptunomonas	0	1.10779e-05	4.4551e-06	0	3.2542e-06	0	2.63985e-06	0	0	0	3.47769e-06	0	4.34661e-06	1.39432e-06
Bacteria;Proteobacteria;Gammaproteobacteria;Oceanospirillales;Oceanospirillaceae;Oleispira	7.35383e-06	1.58255e-06	3.34133e-06	0	0	1.32617e-05	0.000154431	0	0	0	8.69422e-06	0	0	2.78864e-06
Bacteria;Proteobacteria;Gammaproteobacteria;Oceanospirillales;Oceanospirillaceae;Pseudospirillum	0.00147224	0.00168542	0.00104472	0.00116522	0.0001421	0.000695727	0.000117473	0	0	0	0	0	7.28057e-05	0.000524265
Bacteria;Proteobacteria;Gammaproteobacteria;Oceanospirillales;Oceanospirillaceae;Reinekea	0	0	0	0	0	0	2.63985e-06	0	0	0	0	0	0	4.18296e-06
Bacteria;Proteobacteria;Gammaproteobacteria;Oceanospirillales;Oleiphilaceae;Oleiphilus	8.82459e-06	0	1.33653e-05	0	0.000124744	1.73422e-05	1.45192e-05	0	0	0	0	0	2.1733e-06	0.000355552
Bacteria;Proteobacteria;Gammaproteobacteria;Salinisphaerales;Salinisphaeraceae;Salinisphaera	1.47077e-06	2.05732e-05	0.000829763	3.31168e-05	0	2.04026e-06	0	0	0	0	0	1.61428e-06	1.08665e-06	0
Bacteria;Proteobacteria;Gammaproteobacteria;Salinisphaerales;Salinisphaeraceae;ZD0417 marine group	0.00620663	0.00931491	0.00535169	0.00567769	6.5084e-06	0.000171382	8.9755e-05	0	0	0	0	4.84284e-06	3.25996e-06	1.39432e-06
Bacteria;Proteobacteria;Gammaproteobacteria;Thiotrichales;Francisellaceae;Francisella	2.35322e-05	0.000235801	1.89342e-05	0.000262481	3.14573e-05	2.95837e-05	4.88373e-05	0	0	0	3.47769e-06	0	3.25996e-06	8.36593e-06
Bacteria;Proteobacteria;Gammaproteobacteria;Thiotrichales;Piscirickettsiaceae;Hydrogenovibrio	0	0	0	0	0	0.000491702	1.31993e-06	0	0	2.02772e-05	0	0	0	0
Bacteria;Proteobacteria;Gammaproteobacteria;Thiotrichales;Piscirickettsiaceae;Methylophaga	0.000494177	0	0.000390935	1.59451e-05	4.33894e-06	0.00087833	0.00157863	0	0	0	0.00046601	3.22856e-06	0.00025319	0
Bacteria;Proteobacteria;Gammaproteobacteria;Thiotrichales;Thiotrichaceae;Candidatus Thiopilula	0	0	0	0	5.42367e-06	0.000117315	3.16782e-05	0	0	0	1.04331e-05	0	6.51991e-06	0
Bacteria;Proteobacteria;Gammaproteobacteria;Thiotrichales;Thiotrichales Incertae Sedis;Caedibacter	2.94153e-06	1.58255e-06	6.68265e-06	1.10389e-05	0	0	3.95978e-06	0	0	0	0	0	7.60656e-06	2.78864e-06
Bacteria;Proteobacteria;Gammaproteobacteria;Vibrionales;Vibrionaceae;Vibrio	0	7.438e-05	7.79643e-06	6.62335e-05	0	3.46844e-05	0.00017555	0	0	0	0	0	0	2.78864e-06
Bacteria;Proteobacteria;Gammaproteobacteria;Xanthomonadales;Xanthomonadaceae;Aquimonas	0	0	0	0	5.42367e-06	0	0	0	0	0	0	0	0	0
Bacteria;Proteobacteria;Gammaproteobacteria;Xanthomonadales;Xanthomonadaceae;Arenimonas	0	0	0	0	5.42367e-06	0	0	0	0	0	0	0	0	0
Bacteria;Proteobacteria;Gammaproteobacteria;Xanthomonadales;Xanthomonadaceae;Dokdonella	0	0	0	0	3.2542e-06	0	0	0	0	0	0	0	0	4.18296e-06
Bacteria;Proteobacteria;Gammaproteobacteria;Xanthomonadales;Xanthomonadaceae;Metallibacterium	0	0	0	0	0.000155117	0	0	0	0	0	0	1.61428e-06	0	0.000124095
Bacteria;Proteobacteria;Gammaproteobacteria;Xanthomonadales;Xanthomonadaceae;Pseudofulvimonas	0	0	0	0	2.38641e-05	0	0	0	0	0	0	0	0	8.36593e-06
Bacteria;Proteobacteria;Gammaproteobacteria;Xanthomonadales;Xanthomonadaceae;Rhodanobacter	0	0	0	0	2.16947e-05	0	0	0	0	0	0	0	0	7.66877e-05
Bacteria;Proteobacteria;Proteobacteria Incertae Sedis;Unknown Order;Unknown Family;Candidatus Thiobios	0	0	2.22755e-06	0	0	5.71272e-05	7.91956e-06	0	0	0	0	0	5.43326e-06	8.36593e-06
Bacteria;Spirochaetae;Spirochaetes;Spirochaetales;Leptospiraceae;Turneriella	5.88306e-06	0	0	0	0.000104134	0	2.11188e-05	0	0	0	1.73884e-06	0	4.34661e-05	0.000104574
Bacteria;Spirochaetae;Spirochaetes;Spirochaetales;Spirochaetaceae;Borrelia	0	0	3.34133e-06	0	0	8.87511e-05	2.11188e-05	0	0	0	0	0	5.43326e-06	0
Bacteria;Tenericutes;Mollicutes;Entomoplasmatales;Entomoplasmatales Incertae Sedis;Candidatus Hepatoplasma	1.47077e-06	0	7.79643e-06	0	1.08473e-06	0.000974222	0.000467254	0	0	0	8.69422e-06	0	2.06464e-05	0
Bacteria;Tenericutes;Mollicutes;Mycoplasmatales;Mycoplasmataceae;Candidatus Lumbricincola	4.4123e-06	0	7.79643e-06	0	0	8.97713e-05	0.000764237	0	0	0	5.21653e-06	0	3.91195e-05	0
Bacteria;Tenericutes;Mollicutes;Mycoplasmatales;Mycoplasmataceae;Mycoplasma	0	4.74766e-06	4.4551e-06	0	0	0.00103033	0.000246826	4.70517e-06	0	0	3.47769e-06	0	0	0
Bacteria;Thermodesulfobacteria;Thermodesulfobacteria;Thermodesulfobacteriales;Thermodesulfobacteriaceae;PS-B30	0	0	0	0	0	0.000133637	9.23948e-06	0.000196049	0	0	0	0	4.34661e-06	0
Bacteria;Thermodesulfobacteria;Thermodesulfobacteria;Thermodesulfobacteriales;Thermodesulfobacteriaceae;Thermodesulfobacterium	0	0	0	0	0	0	2.63985e-06	0	8.98659e-05	0	0	0	0	0
Bacteria;Thermotogae;Thermotogae;Thermotogales;Thermotogaceae;EM3	0	0	0	1.22655e-06	0	5.20265e-05	3.5638e-05	0	0	0.00047928	0	0	0	0
Bacteria;Thermotogae;Thermotogae;Thermotogales;Thermotogaceae;Thermosipho	0	0	0	0	0	1.83623e-05	1.31993e-05	0	0	5.53016e-06	0	0	0	0
Bacteria;Thermotogae;Thermotogae;Thermotogales;Thermotogaceae;Thermotoga	0	0	0	0	0	7.54895e-05	3.95978e-06	3.13678e-06	1.66418e-06	0.000226736	0	0	0	0
Bacteria;Verrucomicrobia;Opitutae;Opitutales;Opitutaceae;Diplosphaera	8.08921e-05	7.75451e-05	4.90061e-05	1.83982e-05	7.37619e-05	0	3.5638e-05	0	0	0	3.47769e-06	0	8.47588e-05	0.000302568
Bacteria;Verrucomicrobia;Opitutae;Opitutales;Opitutaceae;Opitutus	0	6.0137e-05	1.11378e-06	1.47186e-05	7.70161e-05	0	2.50786e-05	0	0	0	0	0	8.69321e-06	2.78864e-06
Bacteria;Verrucomicrobia;Opitutae;Puniceicoccales;Puniceicoccaceae;Lentimonas	0	4.74766e-06	0	1.10389e-05	2.16947e-06	7.1409e-06	6.59963e-06	0	0	0	3.47769e-05	0	0.000123878	0
Bacteria;Verrucomicrobia;Opitutae;Puniceicoccales;Puniceicoccaceae;Pelagicoccus	2.79445e-05	4.74766e-06	4.4551e-06	0	1.95252e-05	0	2.63985e-06	0	0	0	0	0	1.30398e-05	0.000133855
Bacteria;Verrucomicrobia;Verrucomicrobiae;Verrucomicrobiales;Rubritaleaceae;Rubritalea	5.0006e-05	9.49532e-06	6.4599e-05	2.08513e-05	0.000453419	0.000124456	0.00089359	0	0	0	3.47769e-06	0	0.000127138	1.25489e-05
Bacteria;Verrucomicrobia;Verrucomicrobiae;Verrucomicrobiales;Verrucomicrobiaceae;Haloferula	0	1.58255e-06	1.11378e-06	0	2.38641e-05	2.04026e-06	7.52358e-05	0	0	0	0	0	3.47729e-05	2.09148e-05
Bacteria;Verrucomicrobia;Verrucomicrobiae;Verrucomicrobiales;Verrucomicrobiaceae;Persicirhabdus	0	4.90592e-05	5.68026e-05	1.47186e-05	0.000322166	0.00153835	0.00599511	0.00013645	8.32092e-06	0	5.21653e-05	1.61428e-06	0.000206464	1.11546e-05
Bacteria;Verrucomicrobia;Verrucomicrobiae;Verrucomicrobiales;Verrucomicrobiaceae;Roseibacillus	0.000233852	0.000329171	0.00027733	6.01008e-05	3.2542e-06	3.06038e-06	1.31993e-05	0	0	0	0	0	0	0

## Sheet: exclusive rare Arc_Chim_S_talus
Supplementary table S7: rare species in Kairei and Pelagia fields.
Supplementary table S7.3: exclusive rare archaeal species in chimneys, sulfide talus and other sites.
	open ocean		plume		sulfide talus	vent fluids		active chimney			inactive chimney
#OTU ID	ARF1	ARF4	AF9	AF5	AS3	AF6	AF1	AS5	AS6	AS8	AS7	AS1	AS4
Archaea;Crenarchaeota;Thermoprotei;Desulfurococcales;Desulfurococcaceae;Thermosphaera	0	0	0	0	0	0	0	0	1.41983e-05	3.80604e-05	3.96438e-06	0	0
Archaea;Crenarchaeota;Thermoprotei;Thermoproteales;Thermoproteaceae;Thermoproteus	0	0	0	0	0	0	0	0	0	3.1717e-05	0	0	0

## Sheet: rare Arc
Supplementary table S7: rare species in Kairei and Pelagia fields.
Supplementary table S7.4: rare archaeal species in chimneys, sulfide talus and also other sites.
	open ocean		plume		sulfide talus	vent fluids		active chimney			inactive chimney
#OTU ID	ARF1	ARF4	AF9	AF5	AS3	AF6	AF1	AS5	AS6	AS8	AS7	AS1	AS4
Archaea;Aenigmarchaeota;Aenigmarchaeota Incertae Sedis;Unknown Order;Unknown Family;Candidatus Aenigmarchaeum	0	0	0	0	0	0.000755109	4.14768e-05	7.1426e-06	0	0	0	2.45415e-05	0
Archaea;Crenarchaeota;Thermoprotei;Desulfurococcales;Desulfurococcaceae;Aeropyrum	0	0	0	0	0	0.00115025	2.12701e-06	2.85704e-05	7.09916e-06	0	0	0	0
Archaea;Crenarchaeota;Thermoprotei;Desulfurococcales;Desulfurococcaceae;Staphylothermus	0	0	0	0	0	8.06829e-05	5.31754e-06	1.42852e-05	9.46555e-06	7.92926e-05	1.38753e-05	0.000122707	0
Archaea;Crenarchaeota;Thermoprotei;Desulfurococcales;Desulfurococcaceae;Thermodiscus	0	0	0	2.27327e-06	0	0.00119266	3.19052e-06	0	0.00011122	0.000241049	1.58575e-05	0	0
Archaea;Crenarchaeota;Thermoprotei;Desulfurococcales;Desulfurococcaceae;Thermogladius	0	0	0	0	0	4.13758e-06	2.12701e-06	0	0	0.000954683	0	0	0
Archaea;Crenarchaeota;Thermoprotei;Desulfurococcales;Desulfurococcaceae;Thermosphaera	0	0	0	0	0	0	0	0	1.41983e-05	3.80604e-05	3.96438e-06	0	0
Archaea;Crenarchaeota;Thermoprotei;Desulfurococcales;Pyrodictiaceae;Pyrodictium	0	0	0	0	0	6.51669e-05	0	0	7.09916e-06	6.66058e-05	0	0	0
Archaea;Crenarchaeota;Thermoprotei;Fervidicoccales;Fervidicoccaceae;Fervidicoccus	0	0	0	0	0	2.06879e-06	0	0	0	0.000256908	0	0	0
Archaea;Crenarchaeota;Thermoprotei;Thermoproteales;Thermoproteaceae;Thermoproteus	0	0	0	0	0	0	0	0	0	3.1717e-05	0	0	0
Archaea;Euryarchaeota;Archaeoglobi;Archaeoglobales;Archaeoglobaceae;Geoglobus	0	0	9.57747e-07	0	0	0.000215154	2.44607e-05	4.76173e-06	7.09916e-05	0.000193474	5.94658e-06	8.58951e-05	0
Archaea;Euryarchaeota;Methanococci;Methanococcales;Methanococcaceae;Methanococcus	0	0	0	0	0	0	0.000197812	0	0	6.34341e-06	0	0	0
Archaea;Thaumarchaeota;Marine Group I;Unknown Order;Unknown Family;Candidatus Nitrosoarchaeum	1.55918e-06	0	4.78874e-06	4.54654e-06	1.17203e-06	1.0344e-06	1.06351e-06	0	0	0	0	0	0
Archaea;Thaumarchaeota;Marine Group I;Unknown Order;Unknown Family;Candidatus Nitrosopelagicus	0.000491142	0.00058313	7.85353e-05	0.000352357	6.44618e-05	0.000295837	0.00196962	0	0	0	0	1.49002e-05	0.000322697
